# Supplementary material for: Assessment of Xenoestrogens in Jordanian Water System: Activity and Identification
Source: MDPI journal article supplement (doi:10.3390/toxics11010063), 2023-01-09
Supplement: s1 [file s1]

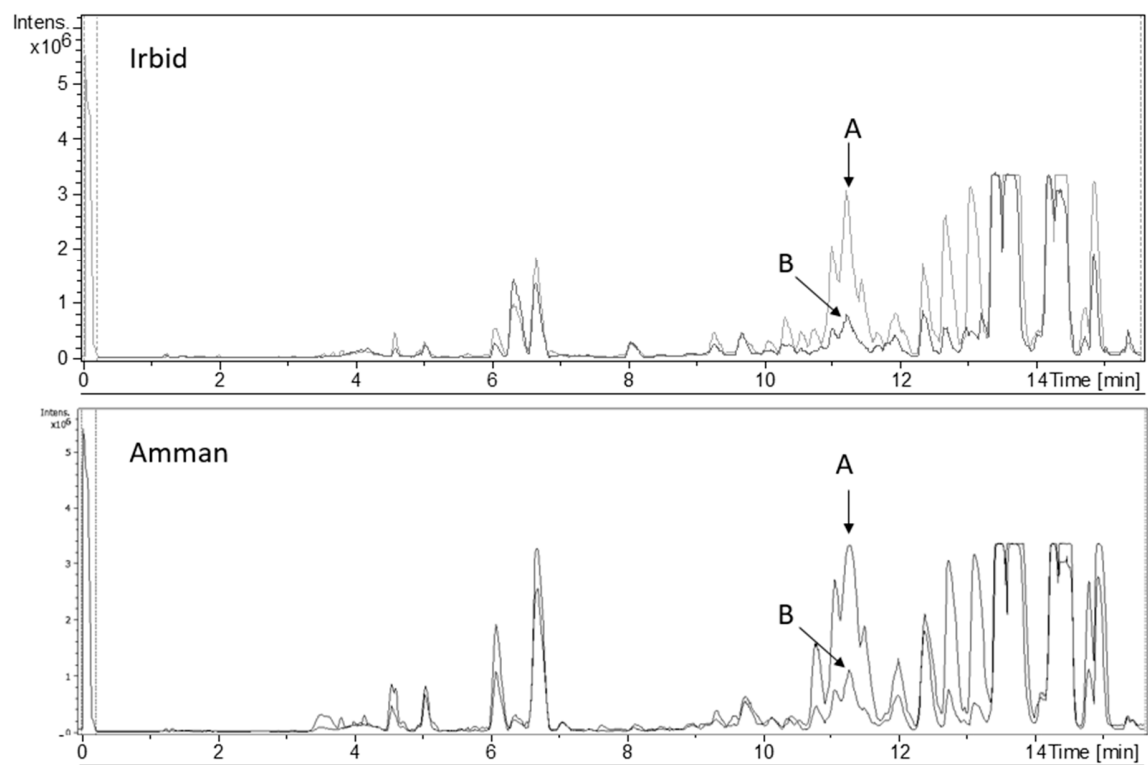

**Figure S1.** The base peak chromatogram for tap water samples from Irbid and Amman. A) All MS. B) Broadband collision-induced dissociation
