# Supplementary material for: Assessment of Xenoestrogens in Jordanian Water System: Activity and Identification
Source: MDPI journal article supplement (doi:10.3390/toxics11010063), 2023-01-09
Supplement: s1 [file s1]

Supplementary Material S4

List of Potential Xenoestrogens according to literature

| Naturally occurring                                                                         |                                                     |                                                               |        |                    |                                                                                                                                                                 |
|---------------------------------------------------------------------------------------------|-----------------------------------------------------|---------------------------------------------------------------|--------|--------------------|-----------------------------------------------------------------------------------------------------------------------------------------------------------------|
| Compound                                                                                    | Chemical Formula                                    | M.Wt                                                          | CAS #  | Occurrence and use |                                                                                                                                                                 |
| 1                                                                                           | 20S-Protopanaxadiol                                 | C <sub>30</sub> H <sub>52</sub> O <sub>3</sub>                | 460.7  | 30636-90-9         | Gastrointestinal metabolic product of ginsenosides<br>Metabolite of zearalenone, used as growth promoter in beef cattle in certain non-European Union countries |
| 2                                                                                           | Alpha-zearalenol                                    | C <sub>18</sub> H <sub>24</sub> O <sub>5</sub>                | 320.4  | 36455-71-7         | Flavonoid                                                                                                                                                       |
| 3                                                                                           | Apigenin                                            | C <sub>15</sub> H <sub>10</sub> O <sub>5</sub>                | 270.24 | 520-36-5           | phytoestrogen                                                                                                                                                   |
| 4                                                                                           | Ferutinine                                          | C <sub>22</sub> H <sub>30</sub> O <sub>4</sub>                | 358.5  | 41743-44-6         | Sesquiterpenoid, Umbelliferae family                                                                                                                            |
| 5                                                                                           | Formononetin                                        | C <sub>16</sub> H <sub>12</sub> O <sub>4</sub>                | 268.26 | 485-72-3           | Isoflavonoid, in red clover and soy extracts                                                                                                                    |
| 6                                                                                           | Genistein                                           | C <sub>15</sub> H <sub>10</sub> O <sub>5</sub>                | 270.24 | 446-72-0           | Isoflavonoid, in red clover and soy extracts                                                                                                                    |
| 7                                                                                           | Kaempferol                                          | C <sub>15</sub> H <sub>10</sub> O <sub>6</sub>                | 286.24 | 520-18-3           | Flavonoid phytoestrogen                                                                                                                                         |
| 8                                                                                           | 1,5-Dibromo-2-(2,4-dibromophenoxy)-3-methoxybenzene | C <sub>13</sub> H <sub>8</sub> Br <sub>4</sub> O <sub>2</sub> | 515.8  | 102739-99-1        | Occur naturally in marine organisms                                                                                                                             |
| 9                                                                                           | Zearalenone                                         | C <sub>18</sub> H <sub>22</sub> O <sub>5</sub>                | 318.4  | 17924-92-4         | Mycotoxin, food contaminant                                                                                                                                     |
| Industrial products and pollutants including organohalogens, plastic components, detergents |                                                     |                                                               |        |                    |                                                                                                                                                                 |
| 1                                                                                           | 3,9-Dihydroxy-benz[a]anthracene                     | C <sub>18</sub> H <sub>12</sub> O <sub>2</sub>                | 260.3  | 56614-97-2         | Potential metabolite of benz[a]anthracene                                                                                                                       |
| 2                                                                                           | 3-Methylcholanthrene                                | C <sub>21</sub> H <sub>16</sub>                               | 268.4  | 56-49-5            | PAH, mainly incomplete combustion                                                                                                                               |
| 3                                                                                           | 4-n-Octylphenol                                     | C <sub>14</sub> H <sub>22</sub> O                             | 206.32 | 1806-26-4          | Intermediate in production of and degradation product of octylphenol ethoxylates used to in rubber, in pesticides and paints                                    |

|    |                                 |                                                               |        |            |                                                                                                                           |
|----|---------------------------------|---------------------------------------------------------------|--------|------------|---------------------------------------------------------------------------------------------------------------------------|
| 4  | 4-Nonylphenol                   | C <sub>15</sub> H <sub>24</sub> O                             | 220.35 | 104-40-5   | Precursor to and degradation product of commercially important detergents                                                 |
| 5  | 4-n-Propylphenol                | C <sub>9</sub> H <sub>12</sub> O                              | 136.19 | 645-56-7   | Degradation product of surfactants                                                                                        |
| 6  | 4-Tert-butyl 2-methylphenol     | C <sub>11</sub> H <sub>16</sub> O                             | 164.24 | 98-27-1    | Industrial product and environmental contaminant                                                                          |
| 7  | 4-Tert-octylphenol              | C <sub>14</sub> H <sub>22</sub> O                             | 206.32 | 140-66-9   | Used in the manufacture of nonionic surfactants                                                                           |
| 8  | 7,12-Dimethyl-benz(a)anthracene | C <sub>20</sub> H <sub>15</sub> F                             | 274.3  | 737-22-4   | PAH, mainly < incomplete combustion                                                                                       |
| 9  | Benzotriazole                   | C <sub>6</sub> H <sub>5</sub> N <sub>3</sub>                  | 119.12 | 95-14-7    | Anticorrosive agent used in aircraft de-icing, antifreeze fluids, and dishwasher detergents                               |
| 10 | Benzyl butyl phthalate          | C <sub>19</sub> H <sub>20</sub> O <sub>4</sub>                | 312.4  | 85-68-7    | Plasticizer for polyvinyl chloride in vinyl floor tiles, vinyl foam, and carpet backing, in cellulosic resins             |
| 11 | Bisphenol A                     | C <sub>15</sub> H <sub>16</sub> O <sub>2</sub>                | 228.29 | 80-05-7    | Used in the production of polycarbonate plastic and epoxy resins used as coatings on the inside of food and beverage cans |
| 12 | Dibutylphthalate                | C <sub>16</sub> H <sub>22</sub> O <sub>4</sub>                | 278.34 | 84-74-2    | Mainly used as plasticiser, also in paints, inks, and cosmetics                                                           |
| 13 | Dichlorostyrene                 | C <sub>8</sub> H <sub>6</sub> Cl <sub>2</sub>                 | 173.04 | 50852-77-2 | Intermediate in chemical industry                                                                                         |
| 14 | Dodecylphenol                   | C <sub>18</sub> H <sub>30</sub> O                             | 262.4  | 27193-86-8 | Used in phenol resins in adhesives and paints                                                                             |
| 15 | Nonylphenols                    | C <sub>15</sub> H <sub>24</sub> O                             | 220.35 | 25154-52-3 | Precursor to and degradation product of commercially important detergents                                                 |
| 16 | Polybrominated diphenyl ether   | C <sub>12</sub> H <sub>4</sub> Br <sub>6</sub> O <sub>3</sub> | 675.6  | 80246-27-1 | Flame retardants used in plastics, foams, building materials, electronics,                                                |

|                                                  |                                     |           |        |             |                                                            |
|--------------------------------------------------|-------------------------------------|-----------|--------|-------------|------------------------------------------------------------|
|                                                  |                                     |           |        |             | furnishings, motor vehicles                                |
|                                                  | Polychlorinated biphenyl            | C12H4Cl6  | 360.9  | 32774-16-6  | Industrial products, used as dielectric and coolant fluids |
| <b>Substances used in personal care products</b> |                                     |           |        |             |                                                            |
|                                                  |                                     |           |        | 15087-24-8  | UV filters, used in sunscreens and cosmetics               |
| 1                                                | 3-Benzylidene camphor               | C17H20O   | 240.34 |             |                                                            |
|                                                  | 4,4-Dihydroxy-benzophenone          | C13H10O3  | 214.22 | 611-99-4    | UV filter, used in sunscreens and cosmetics                |
|                                                  | 4-Hydroxybenzoic acid n-butyl ester | C11H14O4  | 210.23 | 123910-88-3 | Preservatives in foods, drugs, and personal products       |
|                                                  | 4-hydroxybenzoic acid ethyl ester   | C9H10O3   | 166.17 | 120-47-8    | UV filter, used in sunscreens and cosmetics                |
|                                                  | 4-hydroxybenzoic acid propyl ester  | C10H12O3  | 180.2  | 94-13-3     | UV filter, used in sunscreens and cosmetics                |
|                                                  | 4-Hydroxybenzophenone               | C13H10O2  | 198.22 | 1137-42-4   | Metabolite of UV filter, used in sunscreens and cosmetics  |
|                                                  | 4-Methylbenzylidene camphor         | C18H22O   | 254.4  | 36861-47-9  | UV filters, used in sunscreens and cosmetics               |
|                                                  | Benzophenone-1                      | C13H10O3  | 214.22 | 131-56-6    | UV filter, used in sunscreens and cosmetics                |
|                                                  | Benzophenone-2                      | C13H10O5  | 246.21 | 131-55-5    | UV filter, used in sunscreens and cosmetics                |
|                                                  | Benzophenone-3                      | C14H12O3  | 228.24 | 131-57-7    | UV filter, used in sunscreens and cosmetics                |
|                                                  | Benzophenone-4                      | C14H12O6S | 308.31 | 4065-45-6   | UV filter, used in sunscreens and cosmetics                |
|                                                  | Benzyl salicylate                   | C14H12O3  | 228.24 | 118-58-1    | UV filter, used in sunscreens and cosmetics                |
| 13                                               | Ethoxylated ethyl 4-amino benzoate  |           |        |             | UV filter, used in sunscreens and cosmetics                |

|    |                                    |           |        |            |                                             |
|----|------------------------------------|-----------|--------|------------|---------------------------------------------|
| 14 | Ethyl-4-aminobenzoate              | C9H11NO2  | 165.19 | 94-09-7    | UV filter, used in sunscreens and cosmetics |
| 15 | Eusolex 2292,                      | C18H26O3  | 290.4  | 5466-77-3  | UV filter, used in sunscreens and cosmetics |
| 16 | Eusolex 6300,                      | C18H22O   | 254.4  | 36861-47-9 | UV filter, used in sunscreens and cosmetics |
| 17 | Eusolex 6007,                      | C17H27NO2 | 277.4  | 21245-02-3 | UV filter, used in sunscreens and cosmetics |
| 18 | Eusolex HMS                        |           |        |            | UV filter, used in sunscreens and cosmetics |
| 19 | Galaxolide (HHCB)                  | C18H26O   | 258.4  | 1222-05-5  | Fragrance, used in sunscreens and cosmetics |
| 20 | Homosalate                         | C16H22O3  | 262.34 | 118-56-9   | UV filter, used in sunscreens and cosmetics |
| 21 | Isopentyl-4-methoxycinnamate       | C15H20O3  | 248.32 | 71617-10-2 | UV filter, used in sunscreens and cosmetics |
| 22 | Octocrylene                        | C24H27NO2 | 361.5  | 6197-30-4  | UV filter, used in sunscreens and cosmetics |
| 23 | Octyl dimethyl para amino benzoate | C17H27NO2 | 277.4  | 58817-05-3 | UV filter, used in sunscreens and cosmetics |
| 24 | Octyl salicylate                   | C15H22O3  | 250.33 | 6969-49-9  | UV filter, used in sunscreens and cosmetics |
| 25 | Octyl-methoxycinnamate             | C18H26O3  | 290.4  | 83834-59-7 | UV filter, used in sunscreens and cosmetics |
| 26 | Para amino-benzoic acid            | C7H7NO2   | 137.14 | 150-13-0   | UV filter, used in sunscreens and cosmetics |
| 27 | Phenyl salicylate                  | C13H10O3  | 214.22 | 118-55-8   | UV filter, used in sunscreens and cosmetics |
| 28 | Tonalide (AHTN)                    | C18H26O   | 258.4  | 21145-77-7 | UV filter, used in sunscreens and cosmetics |

|  |                   |  |  |  |  |
|--|-------------------|--|--|--|--|
|  | <b>Pesticides</b> |  |  |  |  |
|--|-------------------|--|--|--|--|

|    |                                                                                                                     |               |        |                |                                                                                                                                 |
|----|---------------------------------------------------------------------------------------------------------------------|---------------|--------|----------------|---------------------------------------------------------------------------------------------------------------------------------|
| 1  | 2,4,5-Trichloro-<br>phenoxyacetic acid<br>3-(2,2-Dichlorovinyl)-<br>2,2-<br>dimethylcyclopropene<br>carboxylic acid | C8H5Cl3O3     | 255.5  | 93-76-5        | Herbicide, defoliant<br>used in Agent Orange in<br>Vietnam                                                                      |
| 2  |                                                                                                                     |               |        | 55701-<br>05-8 | Pyrethroid insecticide<br>metabolite                                                                                            |
| 3  | 3-Phenoxybenzoic acid                                                                                               | C13H10O3      | 214.22 | 3739-<br>38-6  | Pyrethroid insecticide<br>metabolite                                                                                            |
| 4  | Alachlor                                                                                                            | C14H20ClNO2   | 269.77 | 15972-<br>60-8 | Acid amide herbicide<br>against grasses and<br>broadleaf weeds. Use as<br>herbicide banned in<br>European Union (2006)          |
| 5  | Aldrin                                                                                                              | C12H8Cl6      | 364.9  | 309-00-<br>2   | Organochlorine<br>insecticide, widely used<br>until 1970s                                                                       |
| 6  | Atrazine                                                                                                            | C8H14ClN5     | 215.68 | 1912-<br>24-9  | Still widely used<br>triazine herbicide,<br>banned in the European<br>Union                                                     |
| 7  | Azinphos-methyl                                                                                                     | C10H12N3O3PS2 | 317.3  | 86-50-0        | Organophosphate<br>insecticide, banned in<br>the European Union<br>(2006)                                                       |
| 8  | Benomyl                                                                                                             | C14H18N4O3    | 290.32 | 17804-<br>35-2 | Carbamate fungicide<br>has been used on fruits                                                                                  |
| 9  | Bromopropylate                                                                                                      | C17H16Br2O3   | 428.1  | 18181-<br>80-1 | Carbinol acaricide, used<br>on fruits and legumes,<br>in viticulture                                                            |
| 10 | Carbaryl                                                                                                            | C12H11NO2     | 201.22 | 63-25-2        | Carbamate insecticide,<br>widely used in gardens,<br>agriculture, and forestry                                                  |
| 11 | Chlomethoxyfen                                                                                                      | C13H9Cl2NO4   | 314.12 | 32861-<br>85-1 | Diphenyl ether<br>herbicide, used on rice                                                                                       |
| 12 | Chlordane                                                                                                           | C10H6Cl8      | 409.8  | 12789-<br>03-6 | Organochlorine<br>pesticide, banned in<br>USA in 1988                                                                           |
| 13 | Chlordecone                                                                                                         | C10Cl10O      | 490.6  | 143-50-<br>0   | Organochlorine<br>insecticide and<br>fungicide, banned by<br>the Stockholm<br>Convention on<br>persistent organic<br>pollutants |
| 14 | Chlornitrofen                                                                                                       | C12H6Cl3NO3   | 318.5  | 1836-<br>77-7  | Diphenyl ether<br>herbicide                                                                                                     |

|    |               |               |        |             |                                                                                                                                                               |
|----|---------------|---------------|--------|-------------|---------------------------------------------------------------------------------------------------------------------------------------------------------------|
| 15 | Chlorpropham  | C10H12ClNO2   | 213.66 | 101-21-3    | Carbamate herbicide and plant growth regulator                                                                                                                |
| 16 | Chlorpyrifos  | C9H11Cl3NO3PS | 350.6  | 2921-88-2   | Organophosphorus insecticide, highly used on corn and fruit trees, still frequently used in Danish greenhouses in 2001                                        |
| 17 | Cycloprothrin | C26H21Cl2NO4  | 482.4  | 63935-38-6  | Pyrethroid insecticide used in agriculture                                                                                                                    |
| 18 | Cyfluthrin    | C22H18Cl2FNO3 | 434.3  | 68359-37-5  | Pyrethroid insecticide, agriculture, home, garden                                                                                                             |
| 19 | Cyhalothrin   | C23H19ClF3NO3 | 449.8  | 68085-85-8  | pyrethroid insecticide, agriculture, home, garden                                                                                                             |
| 20 | Cypermethrin  | C22H19Cl2NO3  | 416.3  | 52315-07-8  | Pyrethroid insecticide, in agriculture, home, garden                                                                                                          |
| 21 | Cyprodinil    | C14H15N3      | 225.29 | 121552-61-2 | Fungicide used in agriculture and on fruit                                                                                                                    |
| 22 | DDE           | C14H8Cl4      | 318    | 72-55-9     | DDT metabolite                                                                                                                                                |
| 23 | DDT,          | C14H9Cl5      | 354.5  | 50-29-3     | Organochlorine pesticide. Banned                                                                                                                              |
| 24 | Deltamethrin  | C22H19Br2NO3  | 505.2  | 52918-63-5  | Pyrethroid insecticide, widely used, still frequently used in Danish greenhouses in 2001                                                                      |
| 25 | Dichlorvos    | C4H7Cl2O4P    | 220.97 | 62-73-7     | Organophosphate insecticide widely used to control household pests, also on outdoor fruit, and vegetable crops. Frequently used in Danish greenhouses in 2001 |
| 26 | Dicofol       | C14H9Cl5O     | 370.5  | 115-32-2    | Organochlorine pesticide for mite control on agricultural crops, ornamentals, and around buildings                                                            |
| 27 | Dieldrin      | C12H8Cl6O     | 380.9  | 60-57-1     | Organochlorine pesticide, now banned in many countries                                                                                                        |

|    |               |                                                                  |        |             |                                                                                                                                                                                                                   |
|----|---------------|------------------------------------------------------------------|--------|-------------|-------------------------------------------------------------------------------------------------------------------------------------------------------------------------------------------------------------------|
| 28 | Dimethomorph  | C <sub>21</sub> H <sub>22</sub> ClNO <sub>4</sub>                | 387.9  | 110488-70-5 | Cinnamic acid fungicide, used in agriculture (potatoes)                                                                                                                                                           |
| 29 | Endosulfan,   | C <sub>9</sub> H <sub>6</sub> Cl <sub>6</sub> O <sub>3</sub> S   | 406.9  | 959-98-8    | Organochlorine insecticide, banned by the Stockholm Convention (2011)                                                                                                                                             |
| 30 | Endrin        | C <sub>12</sub> H <sub>8</sub> Cl <sub>6</sub> O                 | 380.9  | 72-20-8     | Organochlorine pesticide, used in agriculture. Now banned in many countries                                                                                                                                       |
| 31 | Ethoxyquin    | C <sub>14</sub> H <sub>19</sub> NO                               | 217.31 | 91-53-2     | Quinoline-based antioxidant used as a food preservative (E324) and a pesticide                                                                                                                                    |
| 32 | Etofenprox    | C <sub>25</sub> H <sub>28</sub> O <sub>3</sub>                   | 376.5  | 80844-07-1  | Pyrethroid insecticide used in homes (pet and foggers)                                                                                                                                                            |
| 33 | Fenarimol     | C <sub>17</sub> H <sub>12</sub> Cl <sub>2</sub> N <sub>2</sub> O | 331.2  | 60168-88-9  | Heterocyclic organochlorine fungicide, used on ornamentals, trees, horticulture (frequently used in Danish greenhouses in 2001)                                                                                   |
| 34 | Fenbuconazole | C <sub>19</sub> H <sub>17</sub> ClN <sub>4</sub>                 | 336.8  | 114369-43-6 | Triazole fungicide used in agriculture, fruit                                                                                                                                                                     |
| 35 | Fenhexamid    | C <sub>14</sub> H <sub>17</sub> Cl <sub>2</sub> NO <sub>2</sub>  | 302.2  | 126833-17-8 | Fungicide, used on fruit, ornamentals, trees                                                                                                                                                                      |
| 36 | Fenitrothion  | C <sub>9</sub> H <sub>12</sub> NO <sub>5</sub> PS                | 277.24 | 122-14-5    | Organophosphorus insecticide, agriculture, grain storage                                                                                                                                                          |
| 37 | Fenthion      | C <sub>10</sub> H <sub>15</sub> O <sub>3</sub> PS <sub>2</sub>   | 278.3  | 55-38-9     | Organothiophosphate insecticide, avicide, and acaricide, widely used in sugar cane, rice, field corn, beets, pome and stone fruit, citrus fruits, pistachio, cotton, olives, coffee, cocoa, vegetables, and vines |
| 38 | Fenvalerate   | C <sub>25</sub> H <sub>22</sub> ClNO <sub>3</sub>                | 419.9  | 51630-58-1  | Pyrethroid pesticide, agriculture, home, garden                                                                                                                                                                   |

|    |                   |                                                                              |        |             |                                                                                                                                               |
|----|-------------------|------------------------------------------------------------------------------|--------|-------------|-----------------------------------------------------------------------------------------------------------------------------------------------|
| 39 | Fludioxonil       | C <sub>12</sub> H <sub>6</sub> F <sub>2</sub> N <sub>2</sub> O <sub>2</sub>  | 248.18 | 131341-86-1 | Fungicide used on sowing-seed,vegetables, fruits, and ornamentals                                                                             |
| 40 | Imazalil          | C <sub>14</sub> H <sub>14</sub> Cl <sub>2</sub> N <sub>2</sub> O             | 297.2  | 35554-44-0  | Imidazole fungicide: sowing seed, potatoes, and fruits after harvesting                                                                       |
| 41 | Lindane           | C <sub>6</sub> H <sub>6</sub> Cl <sub>6</sub>                                | 290.8  | 319-84-6    | Organochlorine insecticide, used to treat lice and scabies                                                                                    |
| 42 | Linuron           | C <sub>9</sub> H <sub>10</sub> Cl <sub>2</sub> N <sub>2</sub> O <sub>2</sub> | 249.09 | 330-55-2    | Phenylureum herbicide: horticulture                                                                                                           |
| 43 | Methiocarb        | C <sub>11</sub> H <sub>15</sub> NO <sub>2</sub> S                            | 225.31 | 2032-65-7   | Carbamate insecticide, still frequently used in Danish greenhouses in 2001                                                                    |
| 44 | Methoxychlor      | C <sub>16</sub> H <sub>15</sub> Cl <sub>3</sub> O <sub>2</sub>               | 345.6  | 72-43-5     | Organochlorine pesticide, used on crops, ornamentals, livestock, and pets against insects. Banned in the USA (2003) and European Union (2002) |
| 45 | Metolachlor       | C <sub>15</sub> H <sub>22</sub> ClNO <sub>2</sub>                            | 283.79 | 51218-45-2  | Chloroacetanilide herbicide, grass and broadleaf weed control in agriculture                                                                  |
| 46 | O-Phenylphenol    | C <sub>12</sub> H <sub>10</sub> O                                            | 170.21 | 90-43-7     | Fungicide, generally applied after harvest; used for waxing citrus fruits. As a food additive, it has E number E231                           |
| 47 | Pentachlorophenol | C <sub>6</sub> Cl <sub>5</sub> OH                                            | 266.3  | 87-86-5     | Organochlorine pesticide: herbicide, insecticide, fungicide, antifouling paint, preservation of wood. Use now restricted                      |
| 48 | Permethrin        | C <sub>21</sub> H <sub>20</sub> Cl <sub>2</sub> O <sub>3</sub>               | 391.3  | 52645-53-1  | Pyrethroid insecticide, agriculture, home, garden                                                                                             |
| 49 | Pirimicarb        | C <sub>11</sub> H <sub>18</sub> N <sub>4</sub> O <sub>2</sub>                | 238.29 | 23103-98-2  | Carbamate insecticide: vegetable, cereal, and orchard crops                                                                                   |



|    |                   |               |        |             |                                                                                                                         |
|----|-------------------|---------------|--------|-------------|-------------------------------------------------------------------------------------------------------------------------|
|    |                   |               |        |             | Phosphorothioate insecticide: postharvest insecticide used on stored corn and sorghum grain and seed                    |
| 50 | Pirimiphos-methyl | C11H20N3O3PS  | 305.34 | 29232-93-7  | Imidazole-type foliar fungicide: gardening and agriculture, still frequently used in Danish greenhouses in 2001.        |
| 51 | Prochloraz        | C15H16Cl3N3O2 | 376.7  | 67747-09-5  | Dicarboximide fungicide: preharvest spray or postharvest dip of lupins, grapes, stone fruit, strawberries               |
| 52 | Procymidone       | C13H11Cl2NO2  | 284.13 | 32809-16-8  | Carbamate fungicide: horticulture, ornamentals, agriculture                                                             |
| 53 | Propamocarb       | C9H20N2O2     | 188.27 | 24579-73-5  | Benzoylpyrazole herbicide                                                                                               |
| 54 | Pyrazoxyfen       | C20H16Cl2N2O3 | 403.3  | 71561-11-0  | Fungicide: fruit, vineyards                                                                                             |
| 55 | Pyrimethanil      | C12H13N3      | 199.25 | 53112-28-0  | Fungicide: cereals, beets, strawberries, some berries                                                                   |
| 56 | Quinoxifen        | C15H8Cl2FNO   | 308.1  | 124495-18-7 | Triazole fungicide: agriculture. Assessed by the Swedish Chemicals Agency as potentially toxic;                         |
| 57 | Tebuconazole      | C16H22ClN3O   | 307.82 | 107534-96-3 | Pyrethroid insecticide: Primarily pressurized aerosols in household, industrial, commercial, and institutional settings |
| 58 | Tetramethrin      | C19H25NO4     | 331.4  | 7696-12-0   | Organophosphorous fungicide, still frequently used in Danish greenhouses in 2001                                        |
| 59 | Tolclofos-methyl  | C9H11Cl2O3PS  | 301.13 | 57018-04-9  | Organochlorine insecticide (banned in many countries)                                                                   |
| 60 | Toxaphene         | C10H8Cl8      | 411.8  | 8001-35-2   | Organochlorine insecticide: agriculture                                                                                 |
| 61 | Trans-nonachlor   | C10H5Cl9      | 444.2  | 5103-73-1   |                                                                                                                         |

|    |                   |                                                                   |        |             |                                                                                                                                         |
|----|-------------------|-------------------------------------------------------------------|--------|-------------|-----------------------------------------------------------------------------------------------------------------------------------------|
| 62 | tribenuron-methyl | C <sub>15</sub> H <sub>17</sub> N <sub>5</sub> O <sub>6</sub> S   | 395.4  | 101200-48-0 | Herbicide: grains; still frequently used in Danish greenhouses in 2001                                                                  |
| 63 | Triflumizole      | C <sub>15</sub> H <sub>15</sub> ClF <sub>3</sub> N <sub>3</sub> O | 345.75 | 68694-11-1  | Conazole fungicide: plant protection                                                                                                    |
| 64 | Vinclozolin       | C <sub>12</sub> H <sub>9</sub> Cl <sub>2</sub> NO <sub>3</sub>    | 286.11 | 50471-44-8  | Dicarboximide fungicide, used on fruits and vegetables, still frequently used in Danish greenhouses in 2001. Use now strictly regulated |
