# Supplementary material for: Assessment of Xenoestrogens in Jordanian Water System: Activity and Identification
Source: MDPI journal article supplement (doi:10.3390/toxics11010063), 2023-01-09
Supplement: s1 [file s1]

# Compound Spectrum List Report

Analysis Info 24\_August\_2021\_Dr\_Yazan alakam\_818

Acquisition Date 24/08/2021

Method Kailani\_MS/MS

Operator Demo User  
Instrument impact II 1825265.10265

## Acquisition Parameter

|             |          |                      |          |                |           |
|-------------|----------|----------------------|----------|----------------|-----------|
| Source Type | ESI      | Ion Polarity         | Positive | Set Nebulizer  | 2.0 Bar   |
| Focus       | Active   | Set Capillary        | 2500 V   | Set Dry Heater | 200 °C    |
| Scan Begin  | 30 m/z   | Set End Plate Offset | -500 V   | Set Dry Gas    | 8.0 l/min |
| Scan End    | 1000 m/z | Set Charging Voltage | 2000 V   |                |           |

## Cmpd 1, Dissect, 1.3 min

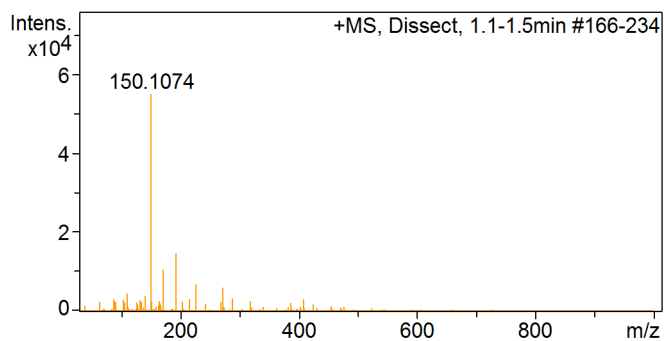

| #  | m/z      | Res.  | S/N   | I     | I %   | FWHM   |
|----|----------|-------|-------|-------|-------|--------|
| 1  | 88.0730  | 19475 | 56.0  | 3111  | 5.7   | 0.0045 |
| 2  | 110.0050 | 23135 | 84.7  | 4704  | 8.5   | 0.0048 |
| 3  | 141.1088 | 25035 | 72.6  | 4032  | 7.3   | 0.0056 |
| 4  | 150.1074 | 26797 | 990.3 | 55026 | 100.0 | 0.0056 |
| 5  | 172.0888 | 27659 | 189.8 | 10545 | 19.2  | 0.0062 |
| 6  | 194.1322 | 29162 | 267.4 | 14855 | 27.0  | 0.0067 |
| 7  | 216.1132 | 29457 | 56.8  | 3157  | 5.7   | 0.0073 |
| 8  | 226.9440 | 29782 | 122.8 | 6824  | 12.4  | 0.0076 |
| 9  | 272.9354 | 31539 | 110.4 | 6132  | 11.1  | 0.0087 |
| 10 | 288.9105 | 26880 | 59.2  | 3291  | 6.0   | 0.0107 |

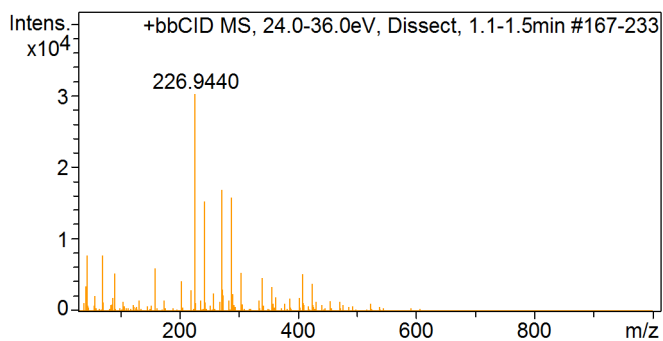

| #  | m/z      | Res.  | S/N   | I     | I %   | FWHM   |
|----|----------|-------|-------|-------|-------|--------|
| 1  | 45.0315  | 15870 | 258.7 | 7815  | 25.9  | 0.0028 |
| 2  | 70.0625  | 18033 | 257.5 | 7779  | 25.7  | 0.0039 |
| 3  | 90.9738  | 20076 | 176.3 | 5327  | 17.6  | 0.0045 |
| 4  | 158.9585 | 27357 | 200.0 | 6042  | 20.0  | 0.0058 |
| 5  | 226.9440 | 31109 | 999.9 | 30210 | 100.0 | 0.0073 |
| 6  | 242.9174 | 31068 | 506.1 | 15290 | 50.6  | 0.0078 |
| 7  | 272.9353 | 31624 | 558.2 | 16865 | 55.8  | 0.0086 |
| 8  | 288.9100 | 29401 | 522.2 | 15778 | 52.2  | 0.0098 |
| 9  | 304.8833 | 28283 | 179.4 | 5421  | 17.9  | 0.0108 |
| 10 | 408.9047 | 29592 | 172.1 | 5199  | 17.2  | 0.0138 |

# Compound Spectrum List Report

## Cmpd 2, Dissect, 1.4 min

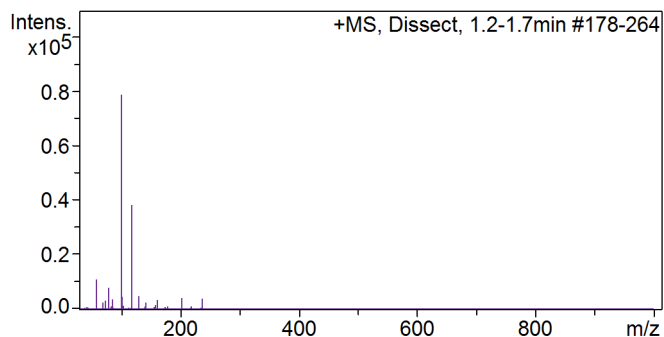

| #  | m/z      | Res.  | S/N   | I     | I %   | FWHM   |
|----|----------|-------|-------|-------|-------|--------|
| 1  | 59.0470  | 17209 | 141.3 | 11219 | 14.2  | 0.0034 |
| 2  | 79.0185  | 18846 | 100.9 | 8011  | 10.2  | 0.0042 |
| 3  | 86.0571  | 18790 | 48.9  | 3880  | 4.9   | 0.0046 |
| 4  | 101.0565 | 21385 | 992.1 | 78741 | 100.0 | 0.0047 |
| 5  | 102.0598 | 20497 | 61.3  | 4864  | 6.2   | 0.0050 |
| 6  | 118.0824 | 23203 | 480.4 | 38127 | 48.4  | 0.0051 |
| 7  | 130.1045 | 23657 | 62.0  | 4923  | 6.3   | 0.0055 |
| 8  | 162.1436 | 26315 | 44.8  | 3556  | 4.5   | 0.0062 |
| 9  | 203.0460 | 29448 | 53.6  | 4251  | 5.4   | 0.0069 |
| 10 | 238.1575 | 29142 | 51.7  | 4102  | 5.2   | 0.0082 |

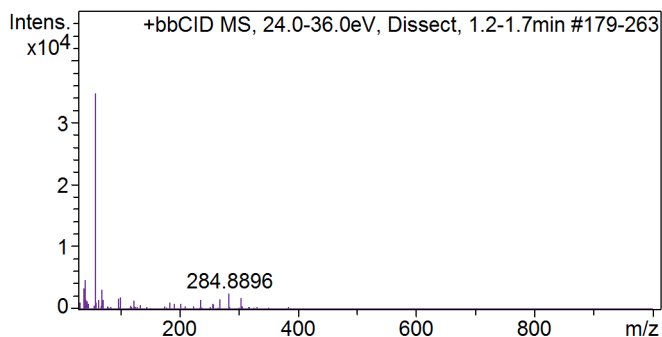

| #  | m/z      | Res.  | S/N   | I     | I %   | FWHM   |
|----|----------|-------|-------|-------|-------|--------|
| 1  | 38.9615  | 14728 | 98.0  | 3414  | 9.8   | 0.0026 |
| 2  | 41.0369  | 15275 | 138.2 | 4813  | 13.8  | 0.0027 |
| 3  | 59.0106  | 17230 | 76.8  | 2676  | 7.7   | 0.0034 |
| 4  | 59.0470  | 17096 | 998.0 | 34754 | 100.0 | 0.0035 |
| 5  | 69.0311  | 17007 | 91.6  | 3191  | 9.2   | 0.0041 |
| 6  | 97.0046  | 19324 | 51.6  | 1798  | 5.2   | 0.0050 |
| 7  | 101.0565 | 20704 | 57.9  | 2015  | 5.8   | 0.0049 |
| 8  | 268.9161 | 32671 | 48.1  | 1674  | 4.8   | 0.0082 |
| 9  | 284.8896 | 30705 | 76.0  | 2645  | 7.6   | 0.0093 |
| 10 | 304.8832 | 28167 | 55.5  | 1933  | 5.6   | 0.0108 |

## Cmpd 3, Dissect, 1.4 min

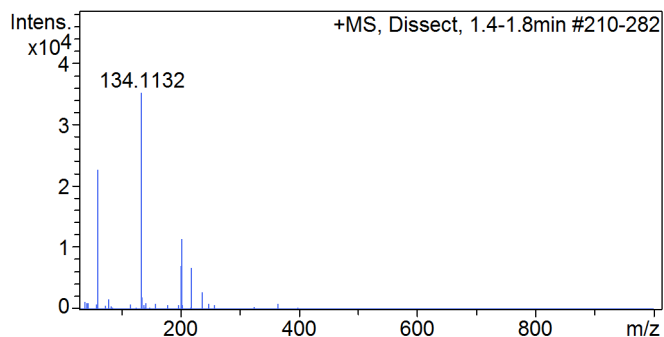

| #  | m/z      | Res.  | S/N   | I     | I %   | FWHM   |
|----|----------|-------|-------|-------|-------|--------|
| 1  | 61.0083  | 16961 | 48.2  | 1702  | 4.8   | 0.0036 |
| 2  | 61.0374  | 17040 | 643.2 | 22687 | 64.5  | 0.0036 |
| 3  | 79.0185  | 18890 | 48.1  | 1698  | 4.8   | 0.0042 |
| 4  | 134.1132 | 25038 | 996.9 | 35162 | 100.0 | 0.0054 |
| 5  | 135.1165 | 23415 | 56.6  | 1995  | 5.7   | 0.0058 |
| 6  | 202.0798 | 29417 | 67.0  | 2362  | 6.7   | 0.0069 |
| 7  | 202.1734 | 29324 | 201.2 | 7098  | 20.2  | 0.0069 |
| 8  | 203.0459 | 29459 | 325.7 | 11488 | 32.7  | 0.0069 |
| 9  | 219.0192 | 28987 | 191.5 | 6754  | 19.2  | 0.0076 |
| 10 | 238.1576 | 30232 | 81.3  | 2867  | 8.2   | 0.0079 |

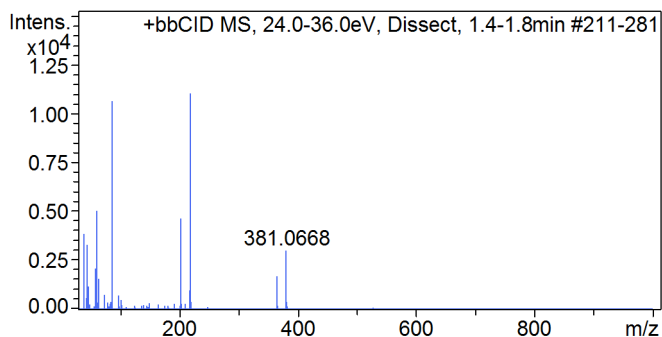

| #  | m/z      | Res.  | S/N   | I     | I %   | FWHM   |
|----|----------|-------|-------|-------|-------|--------|
| 1  | 38.9615  | 14845 | 348.8 | 3853  | 34.9  | 0.0026 |
| 2  | 44.0113  | 15065 | 299.3 | 3305  | 30.0  | 0.0029 |
| 3  | 58.0630  | 17028 | 189.5 | 2093  | 19.0  | 0.0034 |
| 4  | 61.0374  | 16746 | 454.9 | 5024  | 45.5  | 0.0036 |
| 5  | 63.9956  | 16682 | 144.3 | 1593  | 14.4  | 0.0038 |
| 6  | 86.0936  | 18852 | 963.6 | 10643 | 96.5  | 0.0046 |
| 7  | 203.0461 | 29308 | 420.0 | 4638  | 42.0  | 0.0069 |
| 8  | 219.0195 | 29768 | 999.0 | 11034 | 100.0 | 0.0074 |
| 9  | 365.0935 | 32023 | 154.3 | 1704  | 15.4  | 0.0114 |
| 10 | 381.0668 | 32101 | 273.3 | 3018  | 27.4  | 0.0119 |

# Compound Spectrum List Report

## Cmpd 4, Dissect, 1.5 min

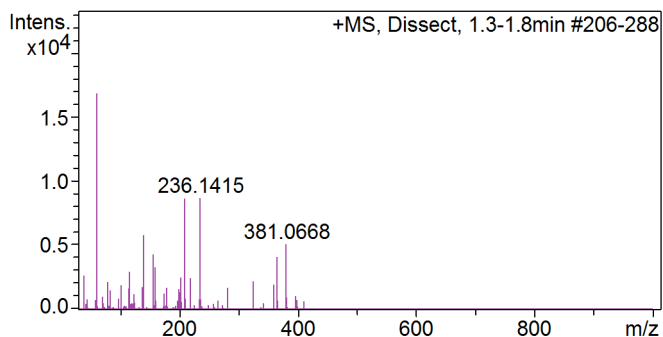

| #  | m/z      | Res.  | S/N   | I     | I %   | FWHM   |
|----|----------|-------|-------|-------|-------|--------|
| 1  | 38.9615  | 14617 | 159.1 | 2686  | 15.9  | 0.0027 |
| 2  | 61.0374  | 16790 | 998.9 | 16868 | 100.0 | 0.0036 |
| 3  | 116.0669 | 23418 | 175.3 | 2961  | 17.6  | 0.0050 |
| 4  | 139.0456 | 25562 | 342.7 | 5787  | 34.3  | 0.0054 |
| 5  | 156.1330 | 25860 | 253.6 | 4282  | 25.4  | 0.0060 |
| 6  | 159.0575 | 26843 | 196.2 | 3314  | 19.6  | 0.0059 |
| 7  | 210.1057 | 30150 | 511.0 | 8629  | 51.2  | 0.0070 |
| 8  | 236.1415 | 31051 | 513.2 | 8666  | 51.4  | 0.0076 |
| 9  | 365.0934 | 31845 | 244.3 | 4126  | 24.5  | 0.0115 |
| 10 | 381.0668 | 32259 | 302.7 | 5111  | 30.3  | 0.0118 |

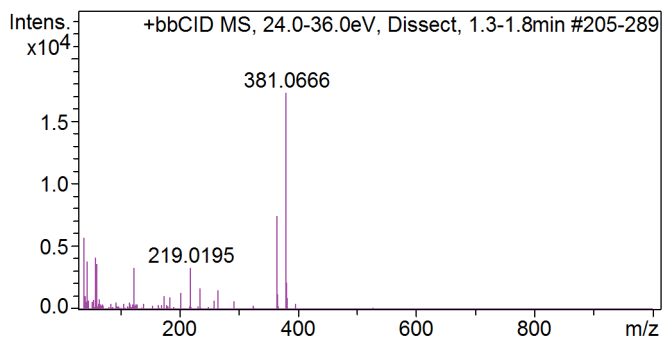

| #  | m/z      | Res.  | S/N   | I     | I %   | FWHM   |
|----|----------|-------|-------|-------|-------|--------|
| 1  | 38.9615  | 14763 | 329.5 | 5704  | 33.1  | 0.0026 |
| 2  | 44.0113  | 15404 | 220.6 | 3818  | 22.1  | 0.0029 |
| 3  | 58.0630  | 17162 | 239.8 | 4152  | 24.1  | 0.0034 |
| 4  | 61.0375  | 16493 | 211.1 | 3655  | 21.2  | 0.0037 |
| 5  | 122.9204 | 23229 | 167.0 | 2891  | 16.8  | 0.0053 |
| 6  | 123.0401 | 23138 | 191.6 | 3317  | 19.2  | 0.0053 |
| 7  | 219.0195 | 29177 | 192.4 | 3331  | 19.3  | 0.0075 |
| 8  | 365.0933 | 31164 | 430.2 | 7447  | 43.2  | 0.0117 |
| 9  | 381.0666 | 31909 | 997.0 | 17258 | 100.0 | 0.0119 |
| 10 | 382.0701 | 32701 | 124.7 | 2159  | 12.5  | 0.0117 |

## Cmpd 5, Dissect, 1.7 min

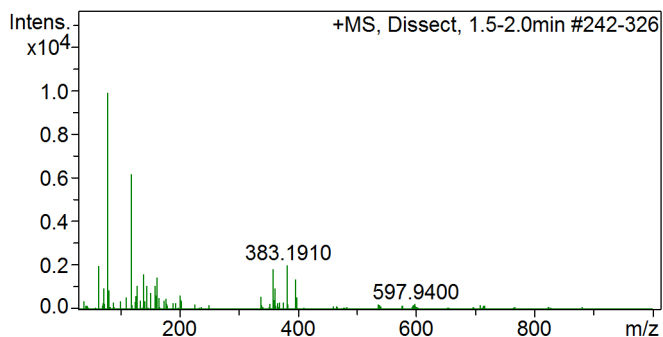

| #  | m/z      | Res.  | S/N   | I    | I %   | FWHM   |
|----|----------|-------|-------|------|-------|--------|
| 1  | 63.9956  | 16687 | 201.7 | 1998 | 20.2  | 0.0038 |
| 2  | 79.0185  | 18907 | 999.1 | 9900 | 100.0 | 0.0042 |
| 3  | 119.0565 | 23672 | 624.3 | 6186 | 62.5  | 0.0050 |
| 4  | 129.0482 | 23999 | 111.1 | 1101 | 11.1  | 0.0054 |
| 5  | 140.0884 | 25151 | 163.6 | 1621 | 16.4  | 0.0056 |
| 6  | 145.0599 | 25944 | 111.1 | 1101 | 11.1  | 0.0056 |
| 7  | 163.1174 | 27341 | 149.6 | 1482 | 15.0  | 0.0060 |
| 8  | 359.3032 | 31918 | 188.4 | 1867 | 18.9  | 0.0113 |
| 9  | 383.1910 | 32600 | 203.7 | 2018 | 20.4  | 0.0118 |
| 10 | 397.2581 | 31551 | 140.8 | 1396 | 14.1  | 0.0126 |

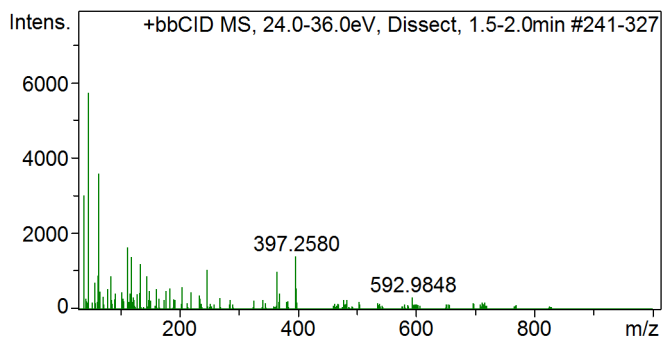

| #  | m/z      | Res.  | S/N   | I    | I %   | FWHM   |
|----|----------|-------|-------|------|-------|--------|
| 1  | 38.9615  | 14721 | 524.7 | 3007 | 52.5  | 0.0026 |
| 2  | 46.9930  | 16011 | 999.7 | 5729 | 100.0 | 0.0029 |
| 3  | 62.9877  | 16946 | 157.3 | 901  | 15.7  | 0.0037 |
| 4  | 63.9956  | 16462 | 625.0 | 3582 | 62.5  | 0.0039 |
| 5  | 112.8919 | 23196 | 286.2 | 1640 | 28.6  | 0.0049 |
| 6  | 119.0564 | 23571 | 243.4 | 1395 | 24.3  | 0.0051 |
| 7  | 134.0402 | 26445 | 210.2 | 1204 | 21.0  | 0.0051 |
| 8  | 248.0136 | 32277 | 184.0 | 1055 | 18.4  | 0.0077 |
| 9  | 365.0933 | 30646 | 176.5 | 1012 | 17.7  | 0.0119 |
| 10 | 397.2580 | 30656 | 244.7 | 1402 | 24.5  | 0.0130 |

# Compound Spectrum List Report

## Cmpd 6, Dissect, 1.8 min

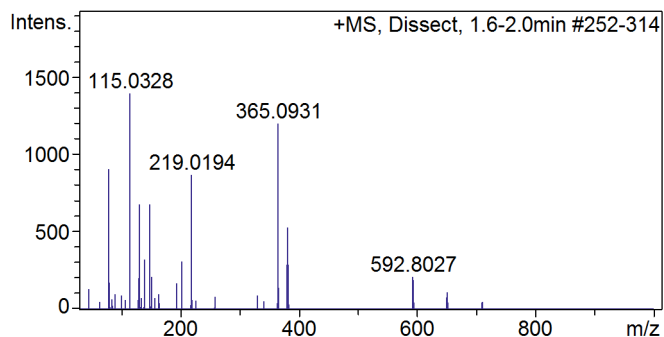

| #  | m/z      | Res.  | S/N   | I    | I %   | FWHM   |
|----|----------|-------|-------|------|-------|--------|
| 1  | 79.0185  | 19018 | 647.1 | 905  | 64.9  | 0.0042 |
| 2  | 115.0328 | 22750 | 997.7 | 1395 | 100.0 | 0.0051 |
| 3  | 131.0060 | 24151 | 483.8 | 676  | 48.5  | 0.0054 |
| 4  | 139.0456 | 25133 | 230.8 | 323  | 23.1  | 0.0055 |
| 5  | 148.0556 | 24892 | 485.2 | 678  | 48.6  | 0.0059 |
| 6  | 203.0460 | 29511 | 223.5 | 312  | 22.4  | 0.0069 |
| 7  | 219.0194 | 29754 | 620.3 | 867  | 62.2  | 0.0074 |
| 8  | 365.0931 | 32086 | 856.9 | 1198 | 85.9  | 0.0114 |
| 9  | 381.2842 | 32226 | 379.9 | 531  | 38.1  | 0.0118 |
| 10 | 383.1913 | 29901 | 208.5 | 292  | 20.9  | 0.0128 |

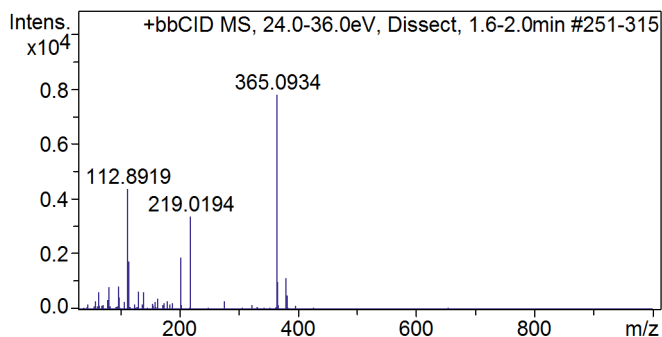

| #  | m/z      | Res.  | S/N    | I    | I %   | FWHM   |
|----|----------|-------|--------|------|-------|--------|
| 1  | 80.9451  | 19320 | 106.7  | 832  | 10.7  | 0.0042 |
| 2  | 96.9188  | 19686 | 109.1  | 851  | 10.9  | 0.0049 |
| 3  | 112.8919 | 23274 | 558.5  | 4358 | 55.9  | 0.0049 |
| 4  | 114.8892 | 22423 | 225.7  | 1761 | 22.6  | 0.0051 |
| 5  | 115.0325 | 24047 | 155.1  | 1210 | 15.5  | 0.0048 |
| 6  | 203.0461 | 29925 | 242.9  | 1895 | 24.3  | 0.0068 |
| 7  | 219.0194 | 29942 | 432.8  | 3378 | 43.3  | 0.0073 |
| 8  | 365.0934 | 30714 | 1000.0 | 7803 | 100.0 | 0.0119 |
| 9  | 366.0968 | 33273 | 128.0  | 999  | 12.8  | 0.0110 |
| 10 | 381.0667 | 29624 | 147.5  | 1151 | 14.8  | 0.0129 |

## Cmpd 7, Dissect, 1.9 min

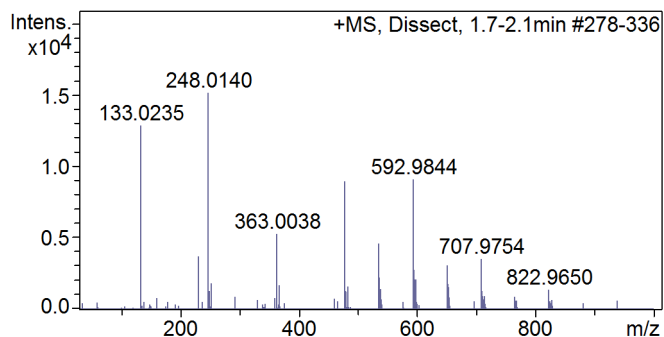

| #  | m/z      | Res.  | S/N   | I     | I %   | FWHM   |
|----|----------|-------|-------|-------|-------|--------|
| 1  | 133.0235 | 25398 | 847.1 | 12853 | 84.9  | 0.0052 |
| 2  | 230.9877 | 31314 | 244.6 | 3711  | 24.5  | 0.0074 |
| 3  | 248.0140 | 30940 | 998.0 | 15142 | 100.0 | 0.0080 |
| 4  | 363.0038 | 33010 | 348.4 | 5287  | 34.9  | 0.0110 |
| 5  | 477.9941 | 34689 | 589.2 | 8940  | 59.0  | 0.0138 |
| 6  | 535.4891 | 37661 | 304.8 | 4624  | 30.5  | 0.0142 |
| 7  | 592.9844 | 33449 | 598.7 | 9083  | 60.0  | 0.0177 |
| 8  | 593.9852 | 38676 | 182.9 | 2775  | 18.3  | 0.0154 |
| 9  | 650.4801 | 34002 | 205.2 | 3114  | 20.6  | 0.0191 |
| 10 | 707.9754 | 30952 | 234.2 | 3553  | 23.5  | 0.0229 |

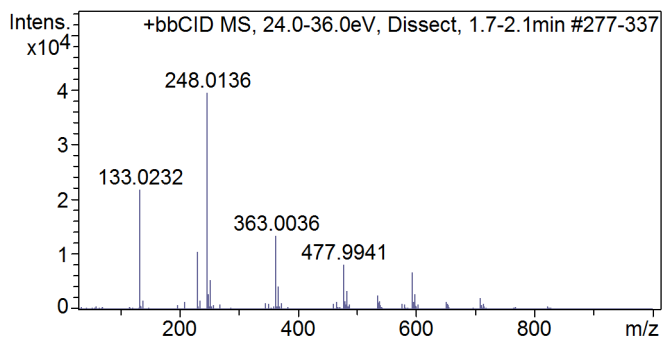

| #  | m/z      | Res.  | S/N   | I     | I %   | FWHM   |
|----|----------|-------|-------|-------|-------|--------|
| 1  | 133.0232 | 25298 | 551.6 | 21831 | 55.3  | 0.0053 |
| 2  | 230.9875 | 30017 | 265.4 | 10505 | 26.6  | 0.0077 |
| 3  | 248.0136 | 32343 | 996.8 | 39451 | 100.0 | 0.0077 |
| 4  | 252.9688 | 30634 | 136.1 | 5385  | 13.6  | 0.0083 |
| 5  | 363.0036 | 33344 | 340.3 | 13467 | 34.1  | 0.0109 |
| 6  | 367.9588 | 30290 | 108.6 | 4297  | 10.9  | 0.0121 |
| 7  | 477.9941 | 34141 | 207.0 | 8194  | 20.8  | 0.0140 |
| 8  | 482.9490 | 30628 | 86.1  | 3406  | 8.6   | 0.0158 |
| 9  | 592.9850 | 36090 | 173.2 | 6854  | 17.4  | 0.0164 |
| 10 | 597.9397 | 31175 | 71.6  | 2836  | 7.2   | 0.0192 |

# Compound Spectrum List Report

## Cmpd 8, Dissect, 2.0 min

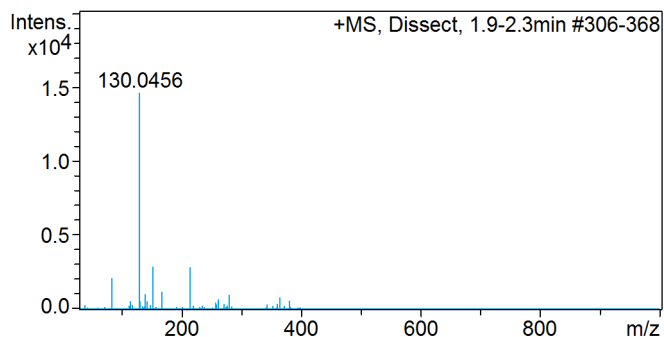

| #  | m/z      | Res.  | S/N   | I     | I %   | FWHM   |
|----|----------|-------|-------|-------|-------|--------|
| 1  | 84.0417  | 18294 | 146.5 | 2146  | 14.7  | 0.0046 |
| 2  | 130.0456 | 25156 | 999.0 | 14632 | 100.0 | 0.0052 |
| 3  | 139.0454 | 24866 | 72.2  | 1057  | 7.2   | 0.0056 |
| 4  | 152.0267 | 26024 | 200.0 | 2930  | 20.0  | 0.0058 |
| 5  | 168.0004 | 26807 | 82.5  | 1209  | 8.3   | 0.0063 |
| 6  | 215.0094 | 30210 | 195.4 | 2862  | 19.6  | 0.0071 |
| 7  | 262.8794 | 31229 | 48.0  | 702   | 4.8   | 0.0084 |
| 8  | 281.0652 | 29018 | 68.2  | 999   | 6.8   | 0.0097 |
| 9  | 365.0932 | 30708 | 57.9  | 848   | 5.8   | 0.0119 |
| 10 | 381.2846 | 28370 | 39.8  | 583   | 4.0   | 0.0134 |

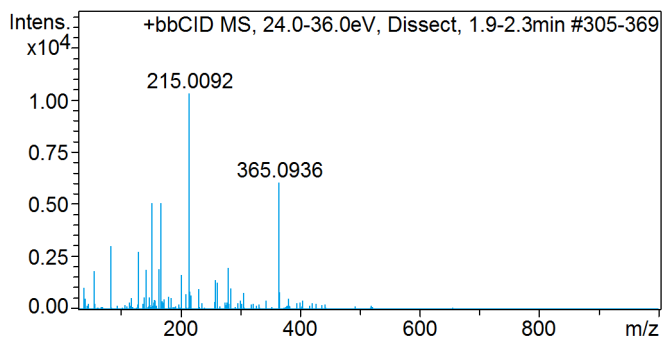

| #  | m/z      | Res.  | S/N   | I     | I %   | FWHM   |
|----|----------|-------|-------|-------|-------|--------|
| 1  | 56.0474  | 17285 | 178.1 | 1837  | 17.8  | 0.0032 |
| 2  | 84.0417  | 19004 | 294.7 | 3039  | 29.5  | 0.0044 |
| 3  | 130.0454 | 24986 | 267.3 | 2757  | 26.8  | 0.0052 |
| 4  | 142.9336 | 25998 | 184.3 | 1901  | 18.4  | 0.0055 |
| 5  | 152.0266 | 26783 | 491.5 | 5070  | 49.2  | 0.0057 |
| 6  | 164.9152 | 27135 | 188.8 | 1947  | 18.9  | 0.0061 |
| 7  | 168.0002 | 26785 | 492.1 | 5075  | 49.2  | 0.0063 |
| 8  | 215.0092 | 29411 | 999.2 | 10306 | 100.0 | 0.0073 |
| 9  | 281.0651 | 33013 | 193.8 | 1999  | 19.4  | 0.0085 |
| 10 | 365.0936 | 30758 | 585.4 | 6038  | 58.6  | 0.0119 |

## Cmpd 9, Dissect, 2.2 min

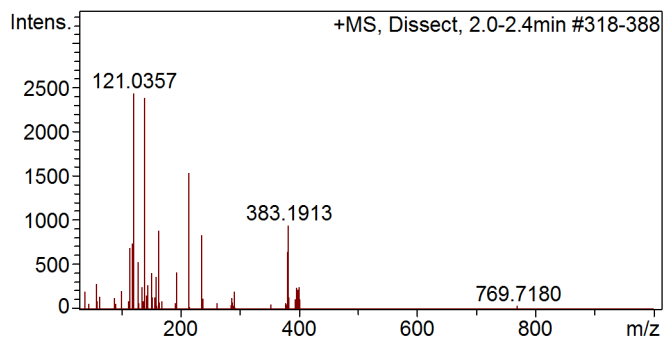

| #  | m/z      | Res.  | S/N   | I    | I %   | FWHM   |
|----|----------|-------|-------|------|-------|--------|
| 1  | 115.0329 | 23223 | 282.9 | 691  | 28.4  | 0.0050 |
| 2  | 119.0565 | 23684 | 306.2 | 748  | 30.7  | 0.0050 |
| 3  | 121.0357 | 23964 | 997.7 | 2436 | 100.0 | 0.0051 |
| 4  | 129.0481 | 23841 | 220.5 | 538  | 22.1  | 0.0054 |
| 5  | 139.0454 | 25538 | 975.9 | 2383 | 97.8  | 0.0054 |
| 6  | 164.9151 | 27637 | 364.9 | 891  | 36.6  | 0.0060 |
| 7  | 215.0092 | 29913 | 629.9 | 1538 | 63.1  | 0.0072 |
| 8  | 236.9904 | 30614 | 344.3 | 841  | 34.5  | 0.0077 |
| 9  | 381.2845 | 31874 | 267.2 | 652  | 26.8  | 0.0120 |
| 10 | 383.1913 | 29907 | 388.2 | 948  | 38.9  | 0.0128 |

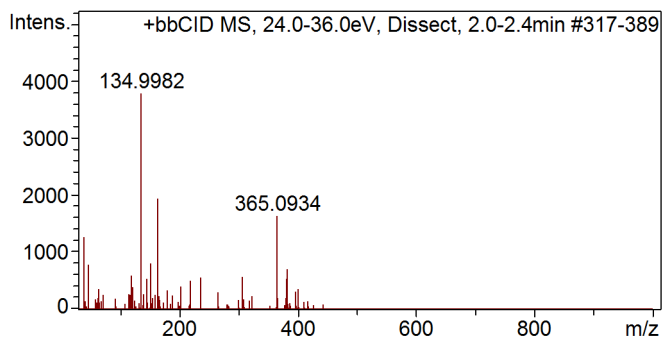

| #  | m/z      | Res.  | S/N   | I    | I %   | FWHM   |
|----|----------|-------|-------|------|-------|--------|
| 1  | 38.9615  | 14901 | 335.7 | 1272 | 33.6  | 0.0026 |
| 2  | 46.9931  | 15952 | 208.4 | 790  | 20.9  | 0.0029 |
| 3  | 119.0565 | 23326 | 157.4 | 597  | 15.7  | 0.0051 |
| 4  | 134.9982 | 25726 | 999.6 | 3788 | 100.0 | 0.0052 |
| 5  | 150.9718 | 25258 | 214.4 | 812  | 21.4  | 0.0060 |
| 6  | 164.9150 | 27372 | 510.9 | 1936 | 51.1  | 0.0060 |
| 7  | 236.9908 | 29569 | 150.2 | 569  | 15.0  | 0.0080 |
| 8  | 306.8416 | 32628 | 151.0 | 572  | 15.1  | 0.0094 |
| 9  | 365.0934 | 31841 | 432.1 | 1637 | 43.2  | 0.0115 |
| 10 | 383.1909 | 33409 | 188.3 | 713  | 18.8  | 0.0115 |

# Compound Spectrum List Report

## Cmpd 10, Dissect, 2.5 min

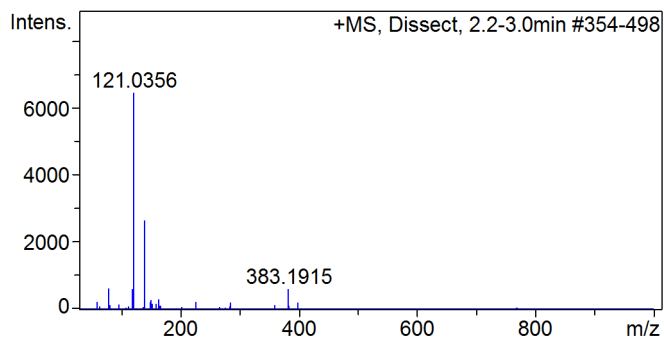

| #  | m/z      | Res.  | S/N   | I    | I %   | FWHM   |
|----|----------|-------|-------|------|-------|--------|
| 1  | 79.0185  | 18861 | 98.2  | 642  | 10.0  | 0.0042 |
| 2  | 119.0564 | 23762 | 95.4  | 623  | 9.7   | 0.0050 |
| 3  | 121.0356 | 23897 | 987.2 | 6450 | 100.0 | 0.0051 |
| 4  | 121.0612 | 21624 | 40.3  | 263  | 4.1   | 0.0056 |
| 5  | 139.0456 | 25138 | 405.2 | 2647 | 41.0  | 0.0055 |
| 6  | 140.0884 | 25340 | 86.9  | 568  | 8.8   | 0.0055 |
| 7  | 149.0138 | 24836 | 34.5  | 226  | 3.5   | 0.0060 |
| 8  | 150.0863 | 26546 | 40.8  | 267  | 4.1   | 0.0057 |
| 9  | 164.9150 | 27506 | 48.4  | 316  | 4.9   | 0.0060 |
| 10 | 383.1915 | 31335 | 95.6  | 625  | 9.7   | 0.0122 |

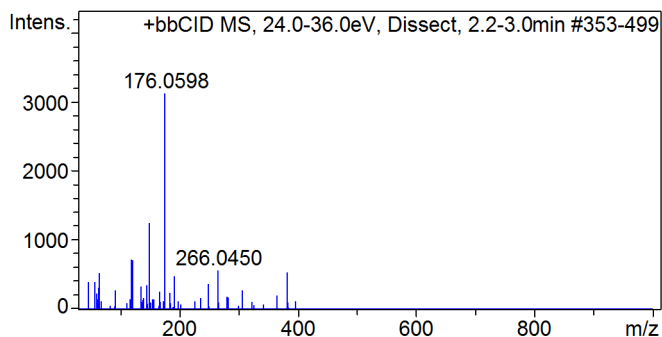

| #  | m/z      | Res.  | S/N   | I    | I %   | FWHM   |
|----|----------|-------|-------|------|-------|--------|
| 1  | 46.9931  | 15877 | 129.2 | 404  | 12.9  | 0.0030 |
| 2  | 57.0677  | 16910 | 128.2 | 401  | 12.8  | 0.0034 |
| 3  | 65.0364  | 17126 | 170.3 | 532  | 17.0  | 0.0038 |
| 4  | 119.0564 | 23574 | 231.5 | 724  | 23.2  | 0.0051 |
| 5  | 121.0357 | 23565 | 227.3 | 711  | 22.7  | 0.0051 |
| 6  | 149.0135 | 26209 | 401.0 | 1254 | 40.1  | 0.0057 |
| 7  | 176.0598 | 27804 | 999.7 | 3126 | 100.0 | 0.0063 |
| 8  | 192.0332 | 29032 | 155.2 | 485  | 15.5  | 0.0066 |
| 9  | 266.0450 | 33581 | 182.3 | 570  | 18.2  | 0.0079 |
| 10 | 383.1914 | 31380 | 171.8 | 537  | 17.2  | 0.0122 |

## Cmpd 11, Dissect, 2.7 min

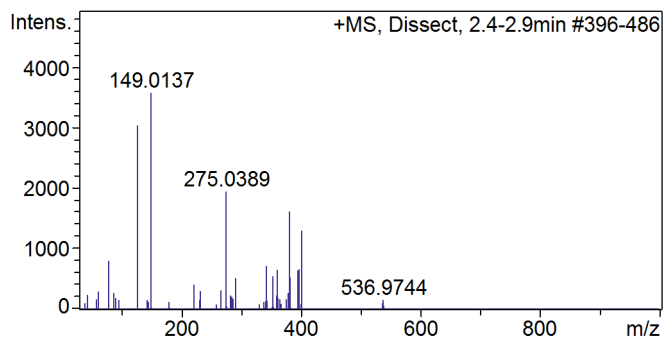

| #  | m/z      | Res.  | S/N   | I    | I %   | FWHM   |
|----|----------|-------|-------|------|-------|--------|
| 1  | 79.0185  | 18910 | 226.1 | 808  | 22.6  | 0.0042 |
| 2  | 127.0324 | 23896 | 846.5 | 3026 | 84.7  | 0.0053 |
| 3  | 149.0137 | 24750 | 999.2 | 3572 | 100.0 | 0.0060 |
| 4  | 275.0389 | 30849 | 544.0 | 1945 | 54.4  | 0.0089 |
| 5  | 343.0237 | 33805 | 200.5 | 717  | 20.1  | 0.0101 |
| 6  | 361.2101 | 32162 | 182.8 | 654  | 18.3  | 0.0112 |
| 7  | 381.2846 | 32177 | 451.1 | 1612 | 45.1  | 0.0118 |
| 8  | 395.0465 | 31364 | 181.4 | 648  | 18.2  | 0.0126 |
| 9  | 397.2580 | 30500 | 185.7 | 664  | 18.6  | 0.0130 |
| 10 | 401.0634 | 34342 | 364.3 | 1302 | 36.5  | 0.0117 |

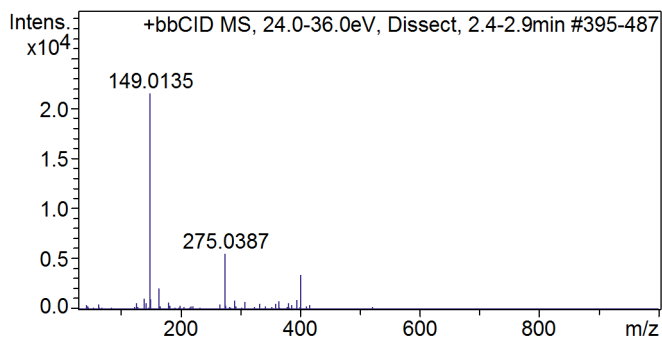

| #  | m/z      | Res.  | S/N   | I     | I %   | FWHM   |
|----|----------|-------|-------|-------|-------|--------|
| 1  | 139.9099 | 25674 | 51.6  | 1112  | 5.2   | 0.0054 |
| 2  | 149.0135 | 26457 | 998.0 | 21529 | 100.0 | 0.0056 |
| 3  | 150.0169 | 25399 | 48.4  | 1044  | 4.8   | 0.0059 |
| 4  | 164.9148 | 27526 | 54.4  | 1173  | 5.4   | 0.0060 |
| 5  | 164.9869 | 27566 | 98.3  | 2120  | 9.8   | 0.0060 |
| 6  | 275.0387 | 31488 | 258.6 | 5579  | 25.9  | 0.0087 |
| 7  | 291.0099 | 26139 | 40.5  | 874   | 4.1   | 0.0111 |
| 8  | 365.0931 | 32161 | 37.8  | 815   | 3.8   | 0.0114 |
| 9  | 395.0466 | 33073 | 45.0  | 971   | 4.5   | 0.0119 |
| 10 | 401.0636 | 30104 | 159.7 | 3444  | 16.0  | 0.0133 |

# Compound Spectrum List Report

## Cmpd 12, Dissect, 2.9 min

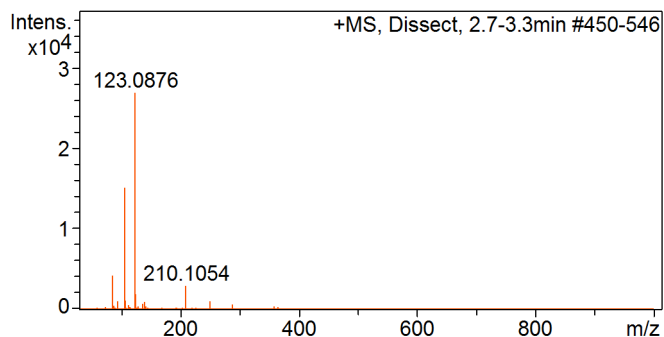

| #  | m/z      | Res.  | S/N   | I     | I %   | FWHM   |
|----|----------|-------|-------|-------|-------|--------|
| 1  | 86.0571  | 19002 | 157.1 | 4237  | 15.7  | 0.0045 |
| 2  | 94.0620  | 19088 | 35.9  | 969   | 3.6   | 0.0049 |
| 3  | 106.0616 | 22386 | 560.4 | 15118 | 56.1  | 0.0047 |
| 4  | 107.0657 | 20096 | 39.6  | 1068  | 4.0   | 0.0053 |
| 5  | 123.0876 | 23451 | 998.2 | 26929 | 100.0 | 0.0052 |
| 6  | 124.0908 | 22424 | 71.2  | 1920  | 7.1   | 0.0055 |
| 7  | 136.0569 | 24676 | 25.8  | 696   | 2.6   | 0.0055 |
| 8  | 140.0883 | 25309 | 34.6  | 934   | 3.5   | 0.0055 |
| 9  | 210.1054 | 29905 | 111.8 | 3016  | 11.2  | 0.0070 |
| 10 | 251.0564 | 30949 | 37.9  | 1021  | 3.8   | 0.0081 |

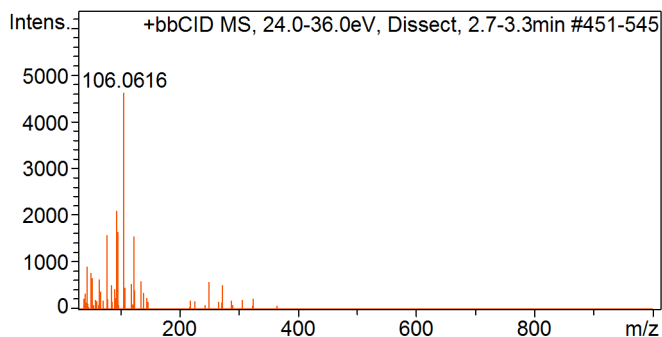

| #  | m/z      | Res.  | S/N   | I    | I %   | FWHM   |
|----|----------|-------|-------|------|-------|--------|
| 1  | 44.0113  | 15499 | 198.3 | 916  | 19.9  | 0.0028 |
| 2  | 44.0476  | 15368 | 154.7 | 715  | 15.5  | 0.0029 |
| 3  | 51.0210  | 16601 | 170.2 | 786  | 17.0  | 0.0031 |
| 4  | 53.0365  | 17057 | 146.6 | 677  | 14.7  | 0.0031 |
| 5  | 65.0364  | 17056 | 140.8 | 651  | 14.1  | 0.0038 |
| 6  | 78.0311  | 18767 | 343.3 | 1586 | 34.4  | 0.0042 |
| 7  | 94.0622  | 19765 | 454.7 | 2101 | 45.5  | 0.0048 |
| 8  | 96.0415  | 19939 | 357.5 | 1652 | 35.8  | 0.0048 |
| 9  | 106.0616 | 21847 | 998.7 | 4614 | 100.0 | 0.0049 |
| 10 | 123.0401 | 24379 | 336.9 | 1556 | 33.7  | 0.0050 |

## Cmpd 13, Dissect, 3.2 min

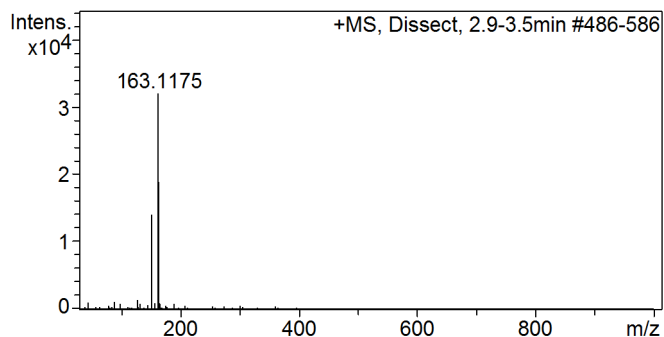

| #  | m/z      | Res.  | S/N   | I     | I %   | FWHM   |
|----|----------|-------|-------|-------|-------|--------|
| 1  | 45.0316  | 15850 | 32.3  | 1037  | 3.2   | 0.0028 |
| 2  | 89.0568  | 20035 | 33.3  | 1069  | 3.3   | 0.0044 |
| 3  | 128.1392 | 23736 | 44.9  | 1443  | 4.5   | 0.0054 |
| 4  | 151.0913 | 26170 | 437.4 | 14052 | 43.8  | 0.0058 |
| 5  | 157.0785 | 26104 | 27.0  | 867   | 2.7   | 0.0060 |
| 6  | 163.1175 | 27695 | 998.1 | 32065 | 100.0 | 0.0059 |
| 7  | 164.1014 | 27688 | 587.4 | 18873 | 58.9  | 0.0059 |
| 8  | 164.1207 | 26238 | 123.9 | 3982  | 12.4  | 0.0063 |
| 9  | 164.9150 | 26361 | 30.9  | 993   | 3.1   | 0.0063 |
| 10 | 165.1046 | 27771 | 27.7  | 891   | 2.8   | 0.0059 |

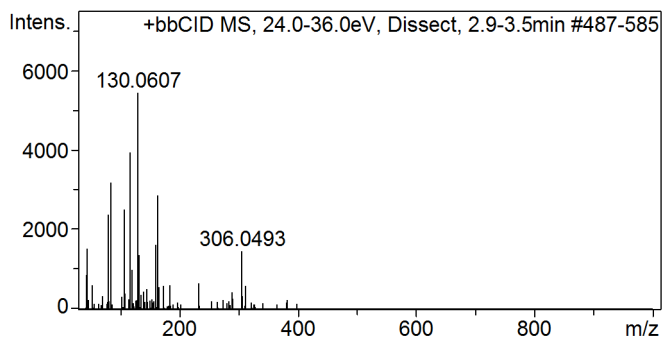

| #  | m/z      | Res.  | S/N   | I    | I %   | FWHM   |
|----|----------|-------|-------|------|-------|--------|
| 1  | 45.0316  | 15593 | 282.0 | 1537 | 28.3  | 0.0029 |
| 2  | 80.0467  | 18769 | 436.7 | 2381 | 43.8  | 0.0043 |
| 3  | 84.0779  | 19629 | 582.7 | 3177 | 58.4  | 0.0043 |
| 4  | 107.0693 | 21914 | 460.1 | 2509 | 46.1  | 0.0049 |
| 5  | 117.0533 | 23116 | 722.6 | 3940 | 72.5  | 0.0051 |
| 6  | 130.0607 | 25104 | 997.1 | 5436 | 100.0 | 0.0052 |
| 7  | 161.0131 | 27195 | 299.3 | 1632 | 30.0  | 0.0059 |
| 8  | 164.1014 | 27293 | 525.7 | 2866 | 52.7  | 0.0060 |
| 9  | 164.9150 | 27098 | 297.0 | 1619 | 29.8  | 0.0061 |
| 10 | 306.0493 | 30889 | 269.8 | 1471 | 27.1  | 0.0099 |

# Compound Spectrum List Report

## Cmpd 14, Dissect, 3.3 min

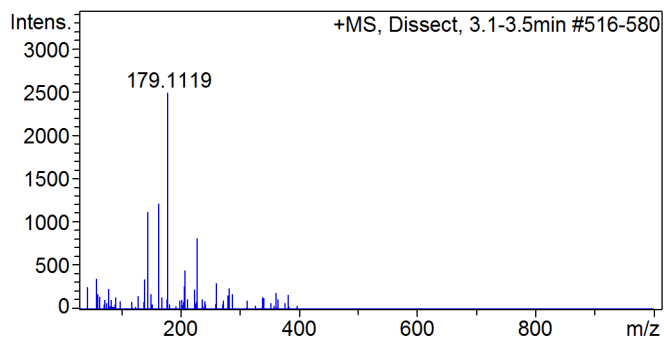

| #  | m/z      | Res.  | S/N   | I    | I %   | FWHM   |
|----|----------|-------|-------|------|-------|--------|
| 1  | 43.0159  | 15908 | 103.1 | 257  | 10.3  | 0.0027 |
| 2  | 58.0630  | 17176 | 141.7 | 353  | 14.2  | 0.0034 |
| 3  | 140.0884 | 25069 | 140.5 | 350  | 14.1  | 0.0056 |
| 4  | 145.0599 | 25888 | 448.1 | 1117 | 44.9  | 0.0056 |
| 5  | 164.1014 | 27549 | 488.0 | 1216 | 48.9  | 0.0060 |
| 6  | 179.1119 | 27295 | 998.8 | 2489 | 100.0 | 0.0066 |
| 7  | 207.1421 | 30082 | 106.8 | 266  | 10.7  | 0.0069 |
| 8  | 209.0952 | 29262 | 180.8 | 451  | 18.1  | 0.0071 |
| 9  | 229.1472 | 29314 | 327.0 | 815  | 32.7  | 0.0078 |
| 10 | 261.1722 | 30567 | 123.7 | 308  | 12.4  | 0.0085 |

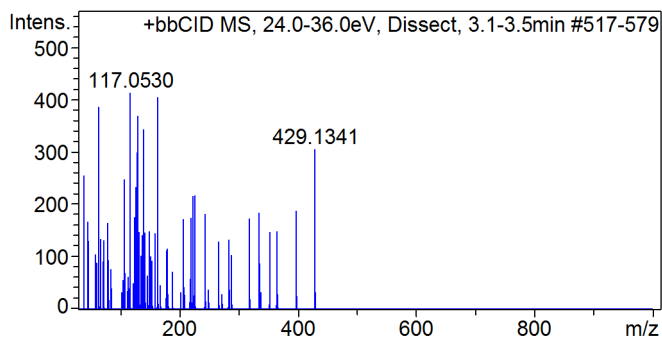

| #  | m/z      | Res.  | S/N   | I   | I %   | FWHM   |
|----|----------|-------|-------|-----|-------|--------|
| 1  | 38.9615  | 14677 | 616.6 | 254 | 61.7  | 0.0027 |
| 2  | 63.9955  | 16496 | 934.8 | 386 | 93.5  | 0.0039 |
| 3  | 107.0694 | 21175 | 600.8 | 248 | 60.1  | 0.0051 |
| 4  | 117.0530 | 23384 | 999.9 | 413 | 100.0 | 0.0050 |
| 5  | 129.0139 | 24637 | 723.7 | 299 | 72.4  | 0.0052 |
| 6  | 130.0608 | 25458 | 893.5 | 369 | 89.4  | 0.0051 |
| 7  | 139.9099 | 25219 | 828.9 | 342 | 82.9  | 0.0055 |
| 8  | 164.1012 | 27670 | 739.6 | 305 | 74.0  | 0.0059 |
| 9  | 164.9150 | 27508 | 981.1 | 405 | 98.1  | 0.0060 |
| 10 | 429.1341 | 39664 | 739.0 | 305 | 73.9  | 0.0108 |

## Cmpd 15, Dissect, 3.3 min

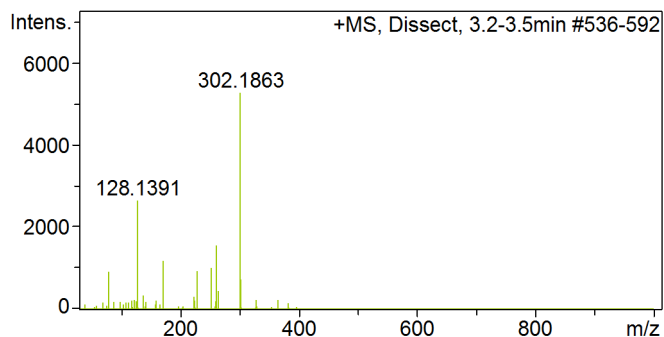

| #  | m/z      | Res.  | S/N   | I    | I %   | FWHM   |
|----|----------|-------|-------|------|-------|--------|
| 1  | 79.0185  | 18998 | 175.0 | 923  | 17.5  | 0.0042 |
| 2  | 128.1391 | 23835 | 503.6 | 2656 | 50.4  | 0.0054 |
| 3  | 172.0909 | 27495 | 225.2 | 1188 | 22.5  | 0.0063 |
| 4  | 172.1640 | 28596 | 85.7  | 452  | 8.6   | 0.0060 |
| 5  | 229.1472 | 30294 | 179.1 | 944  | 17.9  | 0.0076 |
| 6  | 253.1196 | 29688 | 191.9 | 1012 | 19.2  | 0.0085 |
| 7  | 261.1724 | 30131 | 295.1 | 1556 | 29.5  | 0.0087 |
| 8  | 265.0705 | 32160 | 86.2  | 455  | 8.6   | 0.0082 |
| 9  | 302.1863 | 31804 | 999.5 | 5271 | 100.0 | 0.0095 |
| 10 | 303.1894 | 30473 | 138.9 | 733  | 13.9  | 0.0099 |

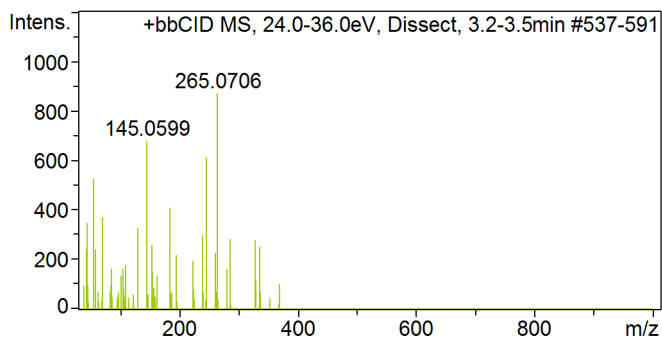

| #  | m/z      | Res.  | S/N   | I   | I %   | FWHM   |
|----|----------|-------|-------|-----|-------|--------|
| 1  | 44.0476  | 15644 | 400.6 | 349 | 40.1  | 0.0028 |
| 2  | 55.0521  | 17280 | 602.7 | 526 | 60.3  | 0.0032 |
| 3  | 70.0626  | 18466 | 426.5 | 372 | 42.7  | 0.0038 |
| 4  | 130.0608 | 25576 | 377.5 | 329 | 37.8  | 0.0051 |
| 5  | 145.0599 | 25689 | 777.3 | 678 | 77.7  | 0.0056 |
| 6  | 185.0746 | 28141 | 472.2 | 412 | 47.2  | 0.0066 |
| 7  | 240.0552 | 29772 | 343.0 | 299 | 34.3  | 0.0081 |
| 8  | 246.0631 | 29187 | 700.6 | 611 | 70.1  | 0.0084 |
| 9  | 265.0706 | 31633 | 999.9 | 872 | 100.0 | 0.0084 |
| 10 | 265.1069 | 27962 | 729.7 | 636 | 73.0  | 0.0095 |



# Compound Spectrum List Report

## Cmpd 16, Dissect, 3.4 min

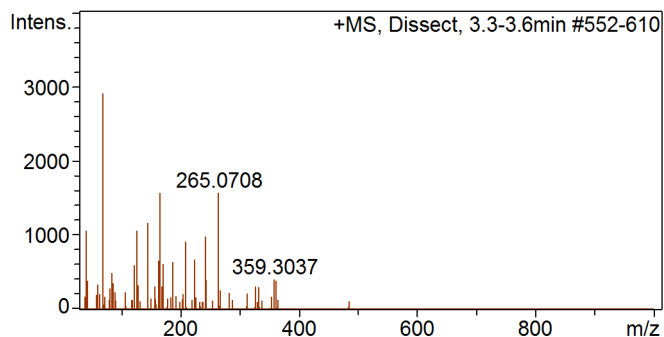

| #  | m/z      | Res.  | S/N   | I    | I %   | FWHM   |
|----|----------|-------|-------|------|-------|--------|
| 1  | 41.0368  | 15240 | 363.3 | 1060 | 36.4  | 0.0027 |
| 2  | 69.0675  | 17646 | 998.9 | 2914 | 100.0 | 0.0039 |
| 3  | 127.0695 | 22411 | 363.1 | 1059 | 36.3  | 0.0057 |
| 4  | 145.0600 | 26388 | 398.4 | 1162 | 39.9  | 0.0055 |
| 5  | 164.1016 | 27454 | 226.6 | 661  | 22.7  | 0.0060 |
| 6  | 166.0805 | 26531 | 537.7 | 1569 | 53.8  | 0.0063 |
| 7  | 210.0435 | 27916 | 313.1 | 914  | 31.3  | 0.0075 |
| 8  | 225.1024 | 27280 | 230.9 | 674  | 23.1  | 0.0083 |
| 9  | 243.1752 | 32801 | 338.2 | 987  | 33.9  | 0.0074 |
| 10 | 265.0708 | 31772 | 538.9 | 1572 | 54.0  | 0.0083 |

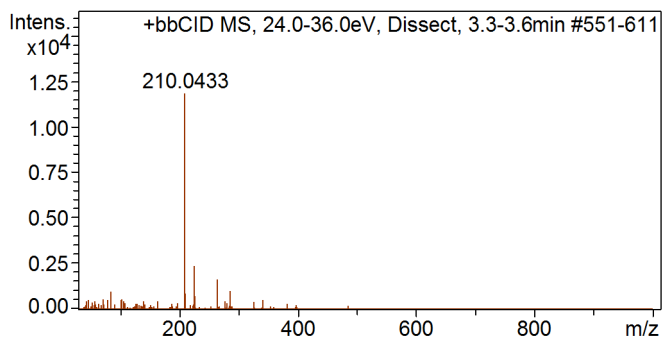

| #  | m/z      | Res.  | S/N   | I     | I %   | FWHM   |
|----|----------|-------|-------|-------|-------|--------|
| 1  | 46.9931  | 16024 | 47.2  | 558   | 4.7   | 0.0029 |
| 2  | 71.0828  | 19294 | 48.5  | 575   | 4.9   | 0.0037 |
| 3  | 84.0780  | 18925 | 84.5  | 1001  | 8.5   | 0.0044 |
| 4  | 103.0509 | 22211 | 48.2  | 570   | 4.8   | 0.0046 |
| 5  | 210.0433 | 29543 | 999.0 | 11830 | 100.0 | 0.0071 |
| 6  | 211.0466 | 26100 | 75.6  | 895   | 7.6   | 0.0081 |
| 7  | 226.0166 | 30903 | 203.0 | 2404  | 20.3  | 0.0073 |
| 8  | 226.9438 | 28892 | 64.9  | 768   | 6.5   | 0.0079 |
| 9  | 265.0706 | 30286 | 140.7 | 1666  | 14.1  | 0.0088 |
| 10 | 287.0522 | 30910 | 86.2  | 1020  | 8.6   | 0.0093 |

## Cmpd 17, Dissect, 3.6 min

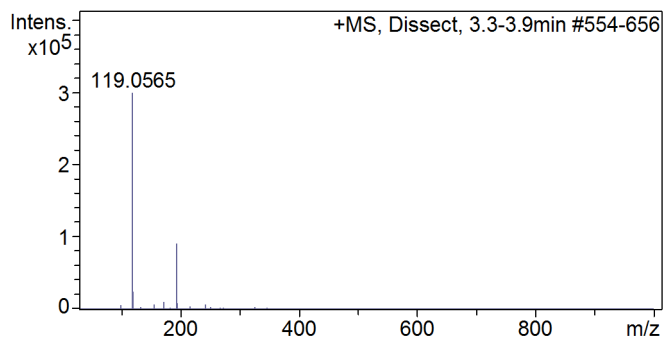

| #  | m/z      | Res.  | S/N   | I      | I %   | FWHM   |
|----|----------|-------|-------|--------|-------|--------|
| 1  | 100.0725 | 20812 | 19.7  | 6107   | 2.0   | 0.0048 |
| 2  | 119.0565 | 24336 | 965.8 | 299107 | 100.0 | 0.0049 |
| 3  | 120.0598 | 22965 | 79.9  | 24733  | 8.3   | 0.0052 |
| 4  | 156.0967 | 27217 | 21.7  | 6724   | 2.2   | 0.0057 |
| 5  | 156.1330 | 26759 | 16.0  | 4956   | 1.7   | 0.0058 |
| 6  | 173.1227 | 28202 | 33.4  | 10342  | 3.5   | 0.0061 |
| 7  | 195.1163 | 28764 | 295.4 | 91499  | 30.6  | 0.0068 |
| 8  | 196.1197 | 28034 | 28.1  | 8718   | 2.9   | 0.0070 |
| 9  | 217.0977 | 29187 | 11.6  | 3608   | 1.2   | 0.0074 |
| 10 | 243.1752 | 31902 | 22.1  | 6842   | 2.3   | 0.0076 |

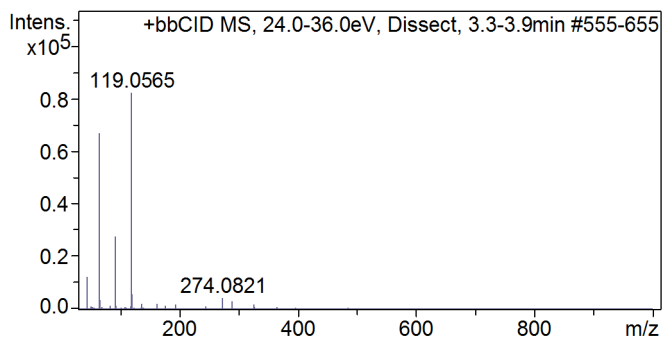

| #  | m/z      | Res.  | S/N   | I     | I %   | FWHM   |
|----|----------|-------|-------|-------|-------|--------|
| 1  | 45.0316  | 15946 | 151.0 | 12524 | 15.2  | 0.0028 |
| 2  | 65.0364  | 17422 | 804.7 | 66763 | 81.2  | 0.0037 |
| 3  | 66.0397  | 16979 | 46.7  | 3871  | 4.7   | 0.0039 |
| 4  | 92.0466  | 19524 | 333.3 | 27652 | 33.6  | 0.0047 |
| 5  | 119.0565 | 23466 | 990.9 | 82206 | 100.0 | 0.0051 |
| 6  | 120.0598 | 22758 | 71.0  | 5891  | 7.2   | 0.0053 |
| 7  | 136.0573 | 25802 | 25.3  | 2095  | 2.5   | 0.0053 |
| 8  | 163.0288 | 26799 | 24.6  | 2040  | 2.5   | 0.0061 |
| 9  | 274.0821 | 31132 | 53.7  | 4457  | 5.4   | 0.0088 |
| 10 | 290.0770 | 30341 | 36.7  | 3042  | 3.7   | 0.0096 |

# Compound Spectrum List Report

## Cmpd 18, Dissect, 3.7 min

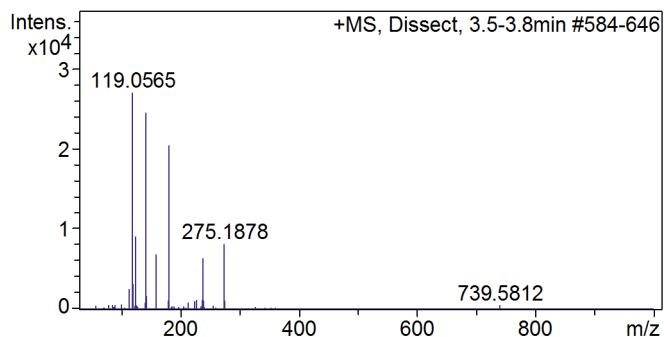

| #  | m/z      | Res.  | S/N   | I     | I %   | FWHM   |
|----|----------|-------|-------|-------|-------|--------|
| 1  | 114.0875 | 22381 | 96.1  | 2597  | 9.6   | 0.0051 |
| 2  | 119.0565 | 24296 | 998.5 | 26992 | 100.0 | 0.0049 |
| 3  | 120.0598 | 22897 | 118.1 | 3191  | 11.8  | 0.0052 |
| 4  | 125.0557 | 23369 | 335.9 | 9079  | 33.6  | 0.0054 |
| 5  | 142.0815 | 25629 | 906.3 | 24498 | 90.8  | 0.0055 |
| 6  | 142.1178 | 25357 | 118.4 | 3201  | 11.9  | 0.0056 |
| 7  | 160.0915 | 26389 | 253.7 | 6858  | 25.4  | 0.0061 |
| 8  | 182.0728 | 28105 | 755.4 | 20419 | 75.6  | 0.0065 |
| 9  | 239.1410 | 30861 | 235.9 | 6378  | 23.6  | 0.0077 |
| 10 | 275.1878 | 31767 | 301.6 | 8153  | 30.2  | 0.0087 |

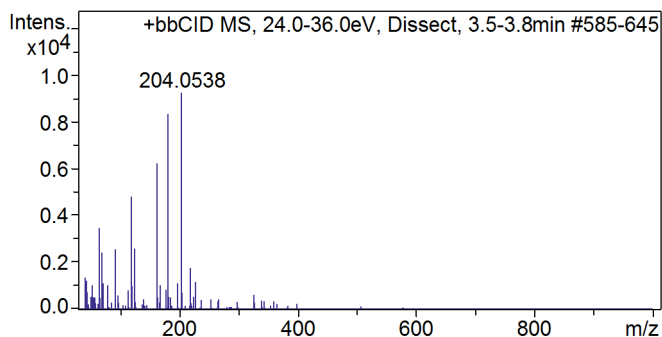

| #  | m/z      | Res.  | S/N   | I    | I %   | FWHM   |
|----|----------|-------|-------|------|-------|--------|
| 1  | 41.0368  | 15404 | 149.5 | 1383 | 15.0  | 0.0027 |
| 2  | 65.0363  | 17477 | 376.7 | 3485 | 37.7  | 0.0037 |
| 3  | 69.0673  | 17705 | 263.2 | 2435 | 26.3  | 0.0039 |
| 4  | 92.0466  | 19272 | 278.7 | 2579 | 27.9  | 0.0048 |
| 5  | 119.0565 | 23282 | 521.1 | 4821 | 52.1  | 0.0051 |
| 6  | 125.0553 | 24576 | 281.9 | 2608 | 28.2  | 0.0051 |
| 7  | 163.0287 | 26822 | 672.5 | 6222 | 67.3  | 0.0061 |
| 8  | 182.0727 | 27873 | 900.0 | 8326 | 90.0  | 0.0065 |
| 9  | 204.0538 | 28342 | 999.7 | 9249 | 100.0 | 0.0072 |
| 10 | 220.0275 | 28371 | 191.5 | 1772 | 19.2  | 0.0078 |

## Cmpd 19, Dissect, 3.7 min

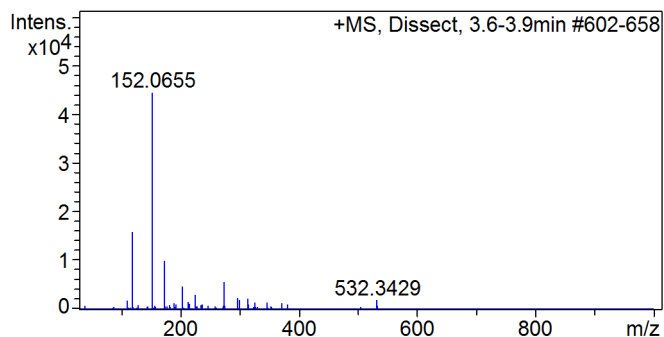

| #  | m/z      | Res.  | S/N   | I     | I %   | FWHM   |
|----|----------|-------|-------|-------|-------|--------|
| 1  | 119.0565 | 24124 | 359.2 | 15965 | 35.9  | 0.0049 |
| 2  | 152.0655 | 26743 | 999.2 | 44412 | 100.0 | 0.0057 |
| 3  | 153.0687 | 26014 | 59.0  | 2623  | 5.9   | 0.0059 |
| 4  | 174.0466 | 27846 | 225.0 | 10001 | 22.5  | 0.0063 |
| 5  | 204.1165 | 27971 | 107.7 | 4788  | 10.8  | 0.0073 |
| 6  | 226.0975 | 29764 | 69.2  | 3076  | 6.9   | 0.0076 |
| 7  | 275.1875 | 31679 | 129.6 | 5759  | 13.0  | 0.0087 |
| 8  | 297.1452 | 28537 | 53.2  | 2363  | 5.3   | 0.0104 |
| 9  | 300.1921 | 30629 | 45.1  | 2003  | 4.5   | 0.0098 |
| 10 | 314.1702 | 30580 | 52.7  | 2343  | 5.3   | 0.0103 |

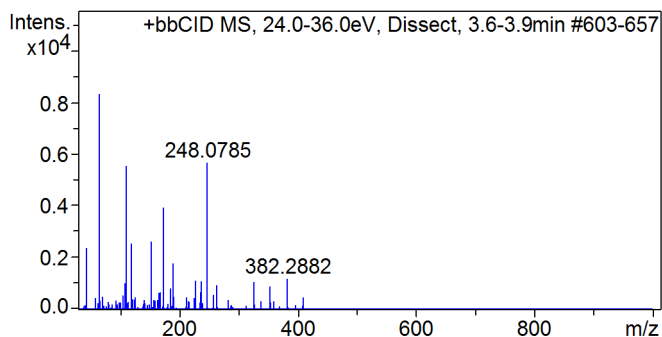

| #  | m/z      | Res.  | S/N   | I    | I %   | FWHM   |
|----|----------|-------|-------|------|-------|--------|
| 1  | 43.0161  | 15372 | 285.2 | 2376 | 28.6  | 0.0028 |
| 2  | 43.0524  | 15107 | 141.9 | 1182 | 14.2  | 0.0028 |
| 3  | 65.0363  | 17365 | 998.6 | 8319 | 100.0 | 0.0037 |
| 4  | 110.0565 | 21177 | 665.1 | 5541 | 66.6  | 0.0052 |
| 5  | 119.0565 | 23255 | 307.9 | 2565 | 30.8  | 0.0051 |
| 6  | 152.0655 | 26796 | 314.8 | 2623 | 31.5  | 0.0057 |
| 7  | 174.0467 | 28067 | 473.7 | 3947 | 47.4  | 0.0062 |
| 8  | 190.0199 | 28319 | 213.4 | 1778 | 21.4  | 0.0067 |
| 9  | 248.0785 | 29687 | 680.4 | 5669 | 68.1  | 0.0084 |
| 10 | 382.2882 | 33054 | 144.6 | 1204 | 14.5  | 0.0116 |

# Compound Spectrum List Report

## Cmpd 20, Dissect, 3.8 min

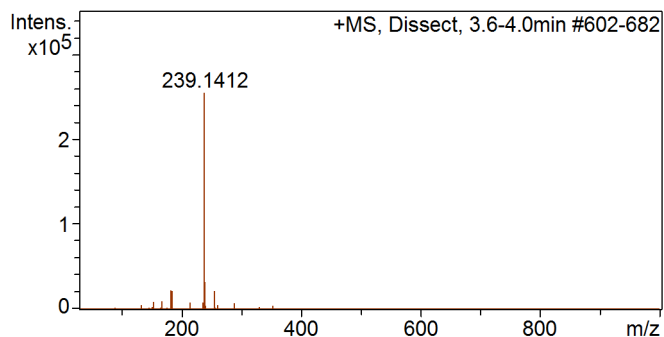

| #  | m/z      | Res.  | S/N   | I      | I %   | FWHM   |
|----|----------|-------|-------|--------|-------|--------|
| 1  | 153.0834 | 25443 | 34.6  | 8848   | 3.5   | 0.0060 |
| 2  | 168.0951 | 24962 | 35.7  | 9128   | 3.6   | 0.0067 |
| 3  | 183.0929 | 28810 | 90.2  | 23092  | 9.1   | 0.0064 |
| 4  | 186.1064 | 28465 | 85.9  | 21997  | 8.6   | 0.0065 |
| 5  | 215.1180 | 29490 | 31.8  | 8144   | 3.2   | 0.0073 |
| 6  | 237.0993 | 29316 | 30.8  | 7887   | 3.1   | 0.0081 |
| 7  | 239.1412 | 30556 | 995.8 | 254856 | 100.0 | 0.0078 |
| 8  | 240.1446 | 31692 | 127.2 | 32545  | 12.8  | 0.0076 |
| 9  | 256.1671 | 32761 | 85.2  | 21800  | 8.6   | 0.0078 |
| 10 | 289.1976 | 34532 | 28.8  | 7367   | 2.9   | 0.0084 |

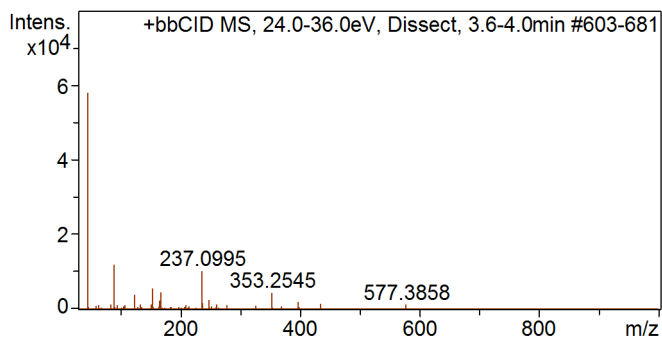

| #  | m/z      | Res.  | S/N   | I     | I %   | FWHM   |
|----|----------|-------|-------|-------|-------|--------|
| 1  | 45.0316  | 16004 | 997.7 | 57971 | 100.0 | 0.0028 |
| 2  | 89.0569  | 18635 | 207.2 | 12037 | 20.8  | 0.0048 |
| 3  | 123.0764 | 23155 | 70.1  | 4070  | 7.0   | 0.0053 |
| 4  | 153.0834 | 25898 | 97.7  | 5678  | 9.8   | 0.0059 |
| 5  | 166.0783 | 27191 | 40.0  | 2323  | 4.0   | 0.0061 |
| 6  | 168.0942 | 27930 | 79.6  | 4625  | 8.0   | 0.0060 |
| 7  | 237.0995 | 30299 | 177.2 | 10294 | 17.8  | 0.0078 |
| 8  | 249.0527 | 28753 | 46.6  | 2710  | 4.7   | 0.0087 |
| 9  | 353.2545 | 32249 | 76.4  | 4441  | 7.7   | 0.0110 |
| 10 | 397.2578 | 31411 | 34.4  | 1998  | 3.4   | 0.0126 |

## Cmpd 21, Dissect, 3.9 min

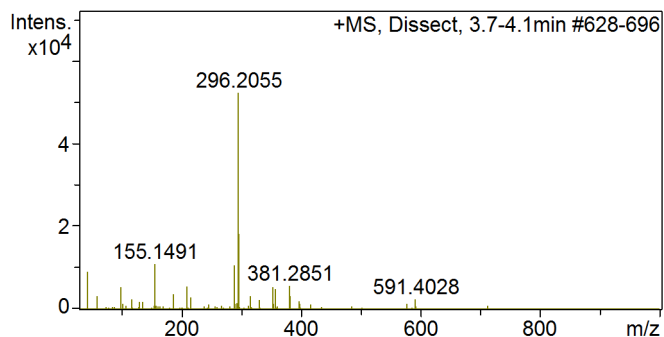

| #  | m/z      | Res.  | S/N   | I     | I %   | FWHM   |
|----|----------|-------|-------|-------|-------|--------|
| 1  | 43.0161  | 15577 | 173.9 | 9102  | 17.4  | 0.0028 |
| 2  | 99.0774  | 20682 | 104.6 | 5476  | 10.5  | 0.0048 |
| 3  | 155.1491 | 25954 | 211.9 | 11086 | 21.2  | 0.0060 |
| 4  | 210.1037 | 27705 | 107.2 | 5608  | 10.7  | 0.0076 |
| 5  | 289.1987 | 32876 | 204.6 | 10706 | 20.5  | 0.0088 |
| 6  | 296.2055 | 34300 | 998.8 | 52265 | 100.0 | 0.0086 |
| 7  | 296.7070 | 34638 | 349.4 | 18285 | 35.0  | 0.0086 |
| 8  | 353.2546 | 32744 | 103.8 | 5432  | 10.4  | 0.0108 |
| 9  | 358.1956 | 33099 | 95.0  | 4969  | 9.5   | 0.0108 |
| 10 | 381.2851 | 35216 | 111.5 | 5835  | 11.2  | 0.0108 |

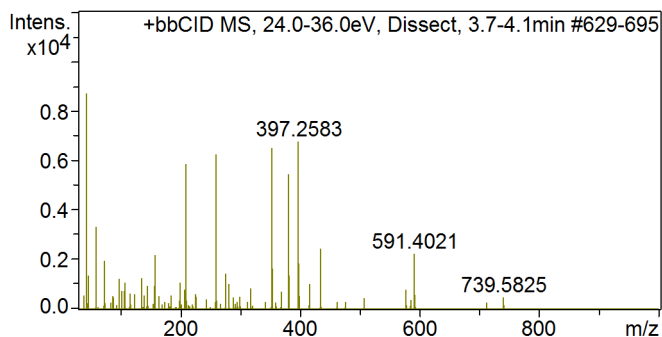

| #  | m/z      | Res.  | S/N   | I    | I %   | FWHM   |
|----|----------|-------|-------|------|-------|--------|
| 1  | 43.0161  | 15354 | 999.4 | 8707 | 100.0 | 0.0028 |
| 2  | 43.0524  | 15441 | 255.4 | 2225 | 25.6  | 0.0028 |
| 3  | 59.0469  | 17276 | 381.8 | 3326 | 38.2  | 0.0034 |
| 4  | 210.1032 | 29098 | 672.5 | 5859 | 67.3  | 0.0072 |
| 5  | 260.0784 | 29940 | 716.5 | 6242 | 71.7  | 0.0087 |
| 6  | 353.2546 | 30990 | 746.8 | 6506 | 74.7  | 0.0114 |
| 7  | 381.2847 | 36191 | 625.5 | 5449 | 62.6  | 0.0105 |
| 8  | 397.2583 | 33405 | 776.3 | 6763 | 77.7  | 0.0119 |
| 9  | 434.2970 | 30310 | 282.7 | 2463 | 28.3  | 0.0143 |
| 10 | 591.4021 | 31572 | 257.5 | 2244 | 25.8  | 0.0187 |

# Compound Spectrum List Report

## Cmpd 22, Dissect, 4.0 min

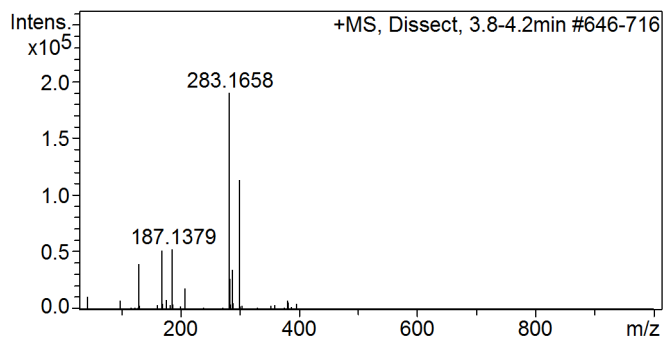

| #  | m/z      | Res.  | S/N   | I      | I %   | FWHM   |
|----|----------|-------|-------|--------|-------|--------|
| 1  | 130.1546 | 24278 | 210.7 | 40199  | 21.2  | 0.0054 |
| 2  | 170.1118 | 27729 | 271.2 | 51738  | 27.2  | 0.0061 |
| 3  | 170.1482 | 26677 | 63.5  | 12120  | 6.4   | 0.0064 |
| 4  | 187.1379 | 29027 | 278.8 | 53173  | 28.0  | 0.0064 |
| 5  | 209.1192 | 29348 | 99.1  | 18904  | 10.0  | 0.0071 |
| 6  | 283.1658 | 31767 | 995.6 | 189915 | 100.0 | 0.0089 |
| 7  | 284.1692 | 32130 | 142.3 | 27152  | 14.3  | 0.0088 |
| 8  | 289.2026 | 32356 | 182.2 | 34759  | 18.3  | 0.0089 |
| 9  | 300.1919 | 32534 | 595.3 | 113554 | 59.8  | 0.0092 |
| 10 | 301.1951 | 32822 | 83.3  | 15889  | 8.4   | 0.0092 |

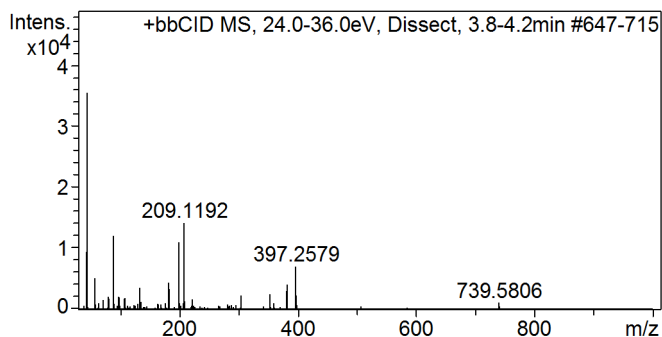

| #  | m/z      | Res.  | S/N   | I     | I %   | FWHM   |
|----|----------|-------|-------|-------|-------|--------|
| 1  | 43.0160  | 15492 | 268.0 | 9505  | 26.8  | 0.0028 |
| 2  | 45.0316  | 15928 | 999.2 | 35431 | 100.0 | 0.0028 |
| 3  | 57.0676  | 17158 | 146.9 | 5208  | 14.7  | 0.0033 |
| 4  | 89.0568  | 19351 | 339.3 | 12030 | 34.0  | 0.0046 |
| 5  | 133.0815 | 24126 | 101.6 | 3604  | 10.2  | 0.0055 |
| 6  | 183.0952 | 27218 | 126.2 | 4476  | 12.6  | 0.0067 |
| 7  | 200.1215 | 29387 | 310.6 | 11015 | 31.1  | 0.0068 |
| 8  | 209.1192 | 29701 | 399.5 | 14167 | 40.0  | 0.0070 |
| 9  | 382.2882 | 33733 | 117.3 | 4158  | 11.7  | 0.0113 |
| 10 | 397.2579 | 32282 | 197.7 | 7010  | 19.8  | 0.0123 |

## Cmpd 23, Dissect, 4.2 min

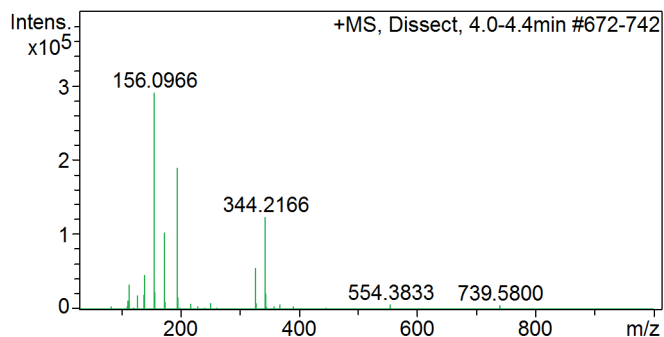

| #  | m/z      | Res.  | S/N   | I      | I %   | FWHM   |
|----|----------|-------|-------|--------|-------|--------|
| 1  | 114.0876 | 22462 | 114.7 | 33532  | 11.5  | 0.0051 |
| 2  | 138.0866 | 25065 | 68.0  | 19889  | 6.8   | 0.0055 |
| 3  | 139.0707 | 25226 | 158.9 | 46464  | 16.0  | 0.0055 |
| 4  | 156.0966 | 28106 | 993.5 | 290555 | 100.0 | 0.0056 |
| 5  | 157.0999 | 25524 | 80.7  | 23608  | 8.1   | 0.0062 |
| 6  | 174.1067 | 28201 | 353.9 | 103493 | 35.6  | 0.0062 |
| 7  | 196.0879 | 29563 | 648.5 | 189662 | 65.3  | 0.0066 |
| 8  | 327.1907 | 32940 | 191.7 | 56066  | 19.3  | 0.0099 |
| 9  | 344.2166 | 33408 | 423.9 | 123958 | 42.7  | 0.0103 |
| 10 | 345.2203 | 30720 | 74.3  | 21721  | 7.5   | 0.0112 |

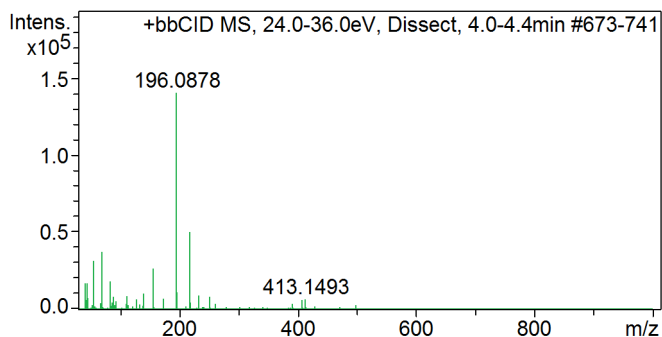

| #  | m/z      | Res.  | S/N   | I      | I %   | FWHM   |
|----|----------|-------|-------|--------|-------|--------|
| 1  | 41.0368  | 15166 | 121.5 | 17083  | 12.2  | 0.0027 |
| 2  | 44.0112  | 15276 | 121.0 | 17006  | 12.1  | 0.0029 |
| 3  | 55.0520  | 16989 | 226.4 | 31836  | 22.6  | 0.0032 |
| 4  | 69.0673  | 17954 | 266.1 | 37412  | 26.6  | 0.0038 |
| 5  | 83.0827  | 19251 | 130.3 | 18324  | 13.0  | 0.0043 |
| 6  | 139.0707 | 25351 | 75.8  | 10659  | 7.6   | 0.0055 |
| 7  | 156.0966 | 26977 | 189.1 | 26581  | 18.9  | 0.0058 |
| 8  | 196.0878 | 28944 | 999.8 | 140567 | 100.0 | 0.0068 |
| 9  | 197.0912 | 28513 | 81.4  | 11443  | 8.1   | 0.0069 |
| 10 | 218.0691 | 30724 | 359.2 | 50506  | 35.9  | 0.0071 |

# Compound Spectrum List Report

## Cmpd 24, Dissect, 4.3 min

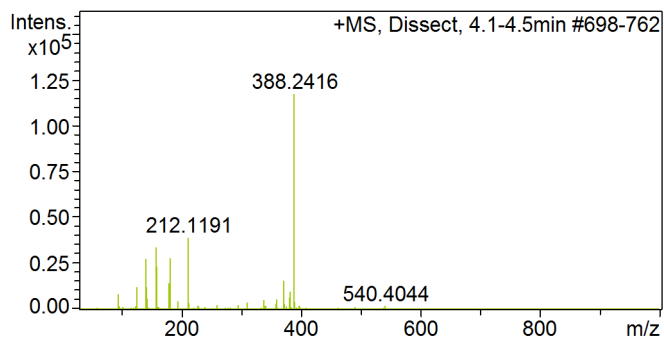

| #  | m/z      | Res.  | S/N   | I      | I %   | FWHM   |
|----|----------|-------|-------|--------|-------|--------|
| 1  | 141.0863 | 25206 | 234.5 | 27562  | 23.5  | 0.0056 |
| 2  | 142.1180 | 25505 | 106.3 | 12494  | 10.6  | 0.0056 |
| 3  | 158.1123 | 26767 | 287.5 | 33795  | 28.8  | 0.0059 |
| 4  | 160.1280 | 26926 | 200.5 | 23564  | 20.1  | 0.0059 |
| 5  | 180.0937 | 27775 | 121.9 | 14326  | 12.2  | 0.0065 |
| 6  | 182.1092 | 27829 | 237.0 | 27858  | 23.7  | 0.0065 |
| 7  | 212.1191 | 28170 | 331.6 | 38976  | 33.2  | 0.0075 |
| 8  | 371.2156 | 31537 | 135.4 | 15915  | 13.6  | 0.0118 |
| 9  | 388.2416 | 34780 | 998.8 | 117410 | 100.0 | 0.0112 |
| 10 | 389.2448 | 31980 | 183.4 | 21563  | 18.4  | 0.0122 |

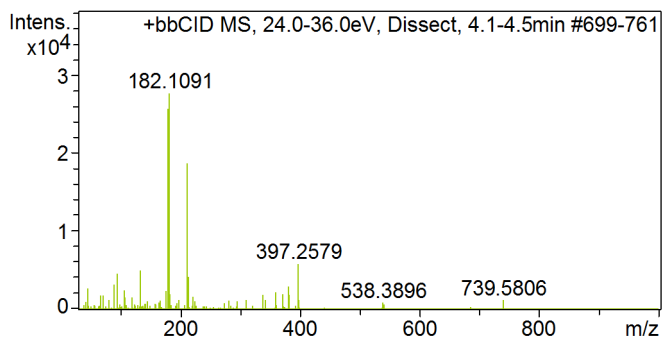

| #  | m/z      | Res.  | S/N   | I     | I %   | FWHM   |
|----|----------|-------|-------|-------|-------|--------|
| 1  | 45.0316  | 16030 | 99.1  | 2749  | 9.9   | 0.0028 |
| 2  | 89.0569  | 18794 | 117.5 | 3260  | 11.8  | 0.0047 |
| 3  | 95.0825  | 19953 | 167.8 | 4654  | 16.8  | 0.0048 |
| 4  | 133.0815 | 24278 | 181.5 | 5035  | 18.2  | 0.0055 |
| 5  | 180.0934 | 28295 | 922.8 | 25600 | 92.4  | 0.0064 |
| 6  | 182.1091 | 28692 | 998.9 | 27709 | 100.0 | 0.0063 |
| 7  | 212.1186 | 29489 | 672.4 | 18654 | 67.3  | 0.0072 |
| 8  | 214.1367 | 30769 | 152.3 | 4224  | 15.2  | 0.0070 |
| 9  | 381.2847 | 35374 | 107.7 | 2989  | 10.8  | 0.0108 |
| 10 | 397.2579 | 32582 | 210.7 | 5846  | 21.1  | 0.0122 |

## Cmpd 25, Dissect, 4.3 min

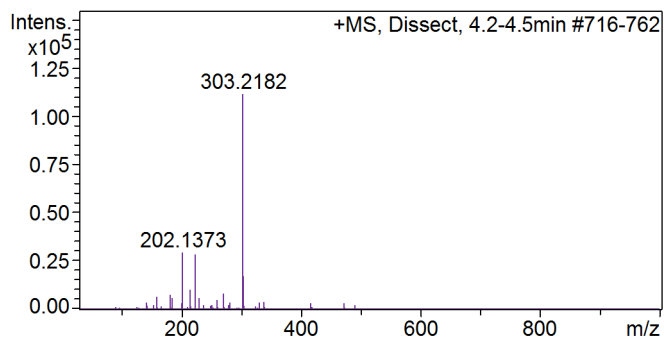

| #  | m/z      | Res.  | S/N   | I      | I %   | FWHM   |
|----|----------|-------|-------|--------|-------|--------|
| 1  | 160.1279 | 26537 | 60.1  | 6737   | 6.0   | 0.0060 |
| 2  | 182.1093 | 27484 | 68.3  | 7661   | 6.9   | 0.0066 |
| 3  | 185.1111 | 27628 | 55.0  | 6168   | 5.5   | 0.0067 |
| 4  | 202.1373 | 29227 | 262.3 | 29413  | 26.4  | 0.0069 |
| 5  | 215.9715 | 29255 | 94.2  | 10562  | 9.5   | 0.0074 |
| 6  | 224.1186 | 30462 | 255.3 | 28628  | 25.7  | 0.0074 |
| 7  | 230.1314 | 29020 | 54.6  | 6118   | 5.5   | 0.0079 |
| 8  | 271.1562 | 30260 | 76.4  | 8562   | 7.7   | 0.0090 |
| 9  | 303.2182 | 33449 | 994.4 | 111500 | 100.0 | 0.0091 |
| 10 | 304.2215 | 31079 | 155.5 | 17430  | 15.6  | 0.0098 |

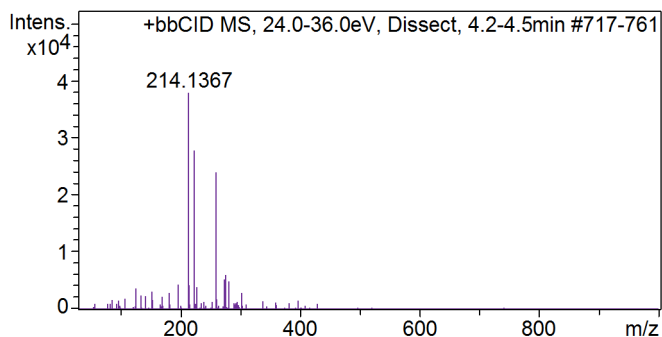

| #  | m/z      | Res.  | S/N   | I     | I %   | FWHM   |
|----|----------|-------|-------|-------|-------|--------|
| 1  | 125.0917 | 23884 | 97.4  | 3697  | 9.8   | 0.0052 |
| 2  | 197.1106 | 28117 | 116.6 | 4427  | 11.7  | 0.0070 |
| 3  | 214.1367 | 30728 | 996.8 | 37849 | 100.0 | 0.0070 |
| 4  | 215.1398 | 26637 | 114.6 | 4351  | 11.5  | 0.0081 |
| 5  | 224.1184 | 30693 | 729.8 | 27711 | 73.2  | 0.0073 |
| 6  | 228.1518 | 29464 | 105.5 | 4006  | 10.6  | 0.0077 |
| 7  | 259.9338 | 31932 | 629.8 | 23913 | 63.2  | 0.0081 |
| 8  | 274.0934 | 29312 | 139.6 | 5302  | 14.0  | 0.0094 |
| 9  | 275.9071 | 30762 | 159.3 | 6049  | 16.0  | 0.0090 |
| 10 | 282.1219 | 30617 | 130.9 | 4971  | 13.1  | 0.0092 |

# Compound Spectrum List Report

## Cmpd 26, Dissect, 4.4 min

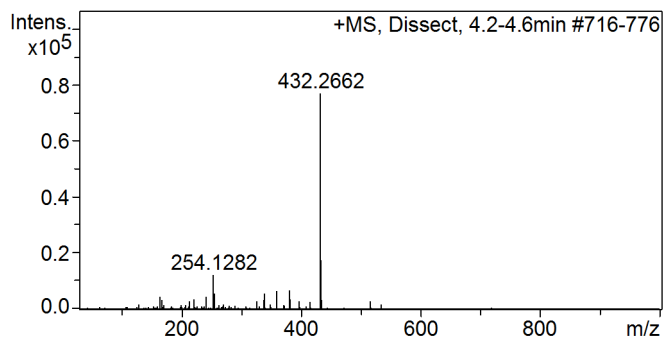

| #  | m/z      | Res.  | S/N   | I     | I %   | FWHM   |
|----|----------|-------|-------|-------|-------|--------|
| 1  | 165.0857 | 27162 | 60.8  | 4693  | 6.1   | 0.0061 |
| 2  | 222.1030 | 27215 | 50.0  | 3863  | 5.0   | 0.0082 |
| 3  | 242.1307 | 29932 | 60.3  | 4654  | 6.0   | 0.0081 |
| 4  | 254.1282 | 30541 | 159.9 | 12342 | 16.0  | 0.0083 |
| 5  | 256.1439 | 30277 | 74.3  | 5733  | 7.4   | 0.0085 |
| 6  | 339.3343 | 33126 | 76.5  | 5907  | 7.7   | 0.0102 |
| 7  | 360.3101 | 31651 | 86.8  | 6700  | 8.7   | 0.0114 |
| 8  | 381.2849 | 35828 | 89.0  | 6874  | 8.9   | 0.0106 |
| 9  | 432.2662 | 34807 | 997.4 | 77008 | 100.0 | 0.0124 |
| 10 | 433.2695 | 33796 | 229.2 | 17693 | 23.0  | 0.0128 |

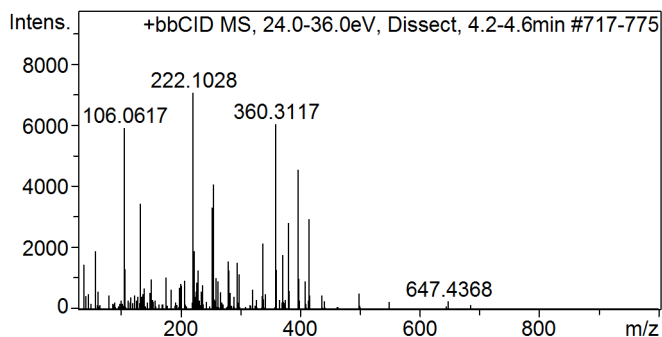

| #  | m/z      | Res.  | S/N   | I    | I %   | FWHM   |
|----|----------|-------|-------|------|-------|--------|
| 1  | 106.0617 | 21893 | 833.7 | 5895 | 83.6  | 0.0048 |
| 2  | 133.0816 | 24324 | 488.0 | 3450 | 48.9  | 0.0055 |
| 3  | 222.1028 | 28742 | 997.8 | 7055 | 100.0 | 0.0077 |
| 4  | 254.1285 | 29589 | 468.0 | 3309 | 46.9  | 0.0086 |
| 5  | 256.1436 | 28071 | 574.2 | 4060 | 57.5  | 0.0091 |
| 6  | 338.3307 | 32842 | 303.1 | 2143 | 30.4  | 0.0103 |
| 7  | 360.3117 | 33566 | 850.8 | 6016 | 85.3  | 0.0107 |
| 8  | 381.2851 | 35747 | 399.9 | 2828 | 40.1  | 0.0107 |
| 9  | 397.2584 | 31607 | 643.8 | 4552 | 64.5  | 0.0126 |
| 10 | 415.2403 | 31812 | 414.9 | 2934 | 41.6  | 0.0131 |

## Cmpd 27, Dissect, 4.5 min

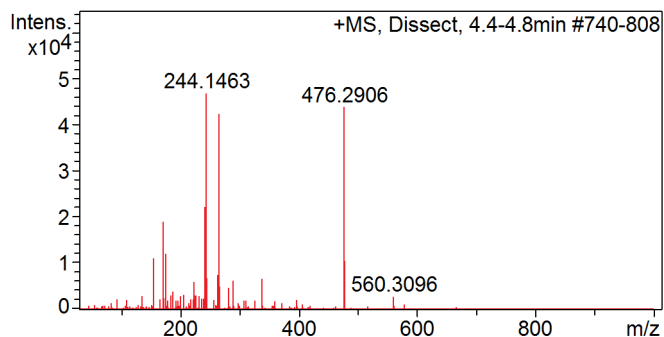

| #  | m/z      | Res.  | S/N   | I     | I %   | FWHM   |
|----|----------|-------|-------|-------|-------|--------|
| 1  | 155.1014 | 26309 | 238.2 | 11188 | 23.9  | 0.0059 |
| 2  | 172.1274 | 27706 | 403.7 | 18961 | 40.5  | 0.0062 |
| 3  | 176.1223 | 27422 | 257.2 | 12078 | 25.8  | 0.0064 |
| 4  | 242.1306 | 30577 | 470.9 | 22119 | 47.2  | 0.0079 |
| 5  | 244.1463 | 31910 | 997.4 | 46845 | 100.0 | 0.0077 |
| 6  | 245.1493 | 28739 | 146.4 | 6877  | 14.7  | 0.0085 |
| 7  | 264.1120 | 30826 | 159.9 | 7508  | 16.0  | 0.0086 |
| 8  | 266.1276 | 32775 | 898.9 | 42222 | 90.1  | 0.0081 |
| 9  | 476.2906 | 33041 | 930.8 | 43719 | 93.3  | 0.0144 |
| 10 | 477.2935 | 31601 | 223.9 | 10514 | 22.4  | 0.0151 |

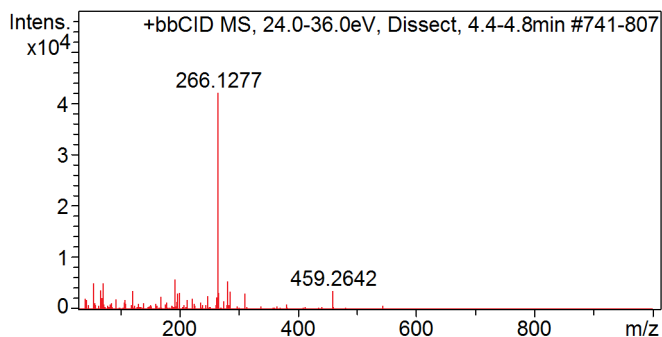

| #  | m/z      | Res.  | S/N   | I     | I %   | FWHM   |
|----|----------|-------|-------|-------|-------|--------|
| 1  | 55.0520  | 17037 | 122.4 | 5148  | 12.2  | 0.0032 |
| 2  | 67.0519  | 17014 | 90.9  | 3823  | 9.1   | 0.0039 |
| 3  | 72.0418  | 18631 | 121.0 | 5089  | 12.1  | 0.0039 |
| 4  | 121.0972 | 22679 | 87.4  | 3675  | 8.7   | 0.0053 |
| 5  | 194.1088 | 28951 | 139.0 | 5844  | 13.9  | 0.0067 |
| 6  | 266.1277 | 32758 | 999.9 | 42051 | 100.0 | 0.0081 |
| 7  | 267.1308 | 29360 | 79.0  | 3324  | 7.9   | 0.0091 |
| 8  | 282.1010 | 27906 | 129.8 | 5459  | 13.0  | 0.0101 |
| 9  | 286.0933 | 30253 | 85.0  | 3574  | 8.5   | 0.0095 |
| 10 | 459.2642 | 32659 | 87.3  | 3671  | 8.7   | 0.0141 |

# Compound Spectrum List Report

## Cmpd 28, Dissect, 4.6 min

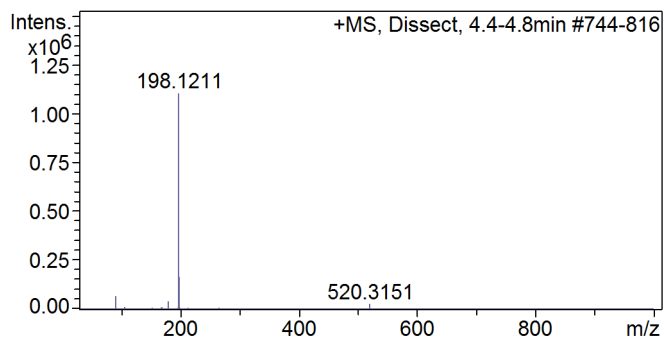

| #  | m/z      | Res.  | S/N   | I       | I %   | FWHM   |
|----|----------|-------|-------|---------|-------|--------|
| 1  | 91.0513  | 20015 | 63.9  | 71423   | 6.5   | 0.0045 |
| 2  | 106.0617 | 21378 | 10.1  | 11313   | 1.0   | 0.0050 |
| 3  | 169.1279 | 27620 | 8.2   | 9165    | 0.8   | 0.0061 |
| 4  | 170.1118 | 29380 | 9.0   | 10051   | 0.9   | 0.0058 |
| 5  | 181.0951 | 27602 | 35.6  | 39757   | 3.6   | 0.0066 |
| 6  | 198.1211 | 31581 | 985.9 | 1102508 | 100.0 | 0.0063 |
| 7  | 199.1245 | 29028 | 149.8 | 167540  | 15.2  | 0.0069 |
| 8  | 214.1368 | 29004 | 8.2   | 9215    | 0.8   | 0.0074 |
| 9  | 266.1277 | 32125 | 6.6   | 7401    | 0.7   | 0.0083 |
| 10 | 520.3151 | 32259 | 24.4  | 27236   | 2.5   | 0.0161 |

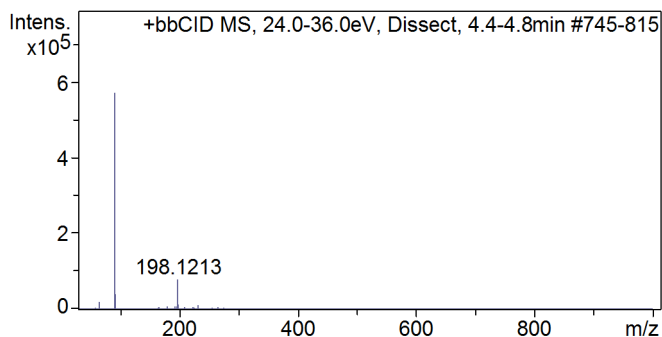

| #  | m/z      | Res.  | S/N   | I      | I %   | FWHM   |
|----|----------|-------|-------|--------|-------|--------|
| 1  | 65.0364  | 17148 | 32.3  | 18578  | 3.3   | 0.0038 |
| 2  | 91.0513  | 21642 | 993.8 | 571183 | 100.0 | 0.0042 |
| 3  | 92.0547  | 19825 | 72.9  | 41894  | 7.3   | 0.0046 |
| 4  | 181.0951 | 26621 | 14.6  | 8371   | 1.5   | 0.0068 |
| 5  | 194.1089 | 28787 | 12.3  | 7056   | 1.2   | 0.0067 |
| 6  | 197.1086 | 27284 | 12.6  | 7230   | 1.3   | 0.0072 |
| 7  | 198.1213 | 29739 | 138.8 | 79791  | 14.0  | 0.0067 |
| 8  | 199.1246 | 26879 | 20.7  | 11916  | 2.1   | 0.0074 |
| 9  | 210.1033 | 30190 | 11.5  | 6628   | 1.2   | 0.0070 |
| 10 | 232.0845 | 31157 | 19.8  | 11380  | 2.0   | 0.0074 |

## Cmpd 29, Dissect, 4.6 min

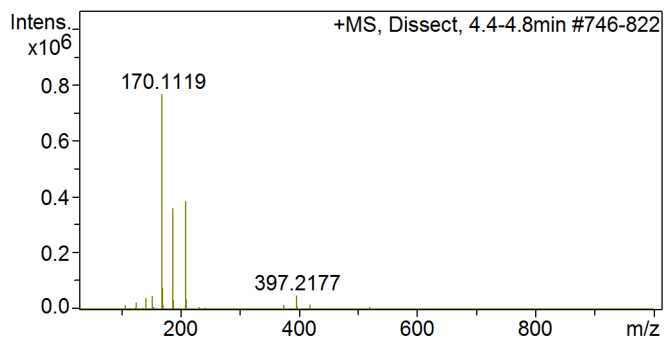

| #  | m/z      | Res.  | S/N   | I      | I %   | FWHM   |
|----|----------|-------|-------|--------|-------|--------|
| 1  | 142.1179 | 25528 | 53.9  | 41624  | 5.4   | 0.0056 |
| 2  | 152.1018 | 26181 | 64.3  | 49651  | 6.5   | 0.0058 |
| 3  | 153.0859 | 25909 | 50.1  | 38737  | 5.0   | 0.0059 |
| 4  | 170.1119 | 29536 | 993.6 | 767663 | 100.0 | 0.0058 |
| 5  | 171.1152 | 27524 | 100.9 | 77993  | 10.2  | 0.0062 |
| 6  | 188.1219 | 30195 | 467.4 | 361103 | 47.0  | 0.0062 |
| 7  | 189.1253 | 26764 | 46.2  | 35689  | 4.6   | 0.0071 |
| 8  | 210.1032 | 31404 | 498.8 | 385360 | 50.2  | 0.0067 |
| 9  | 211.1066 | 27318 | 48.9  | 37806  | 4.9   | 0.0077 |
| 10 | 397.2177 | 33715 | 66.2  | 51131  | 6.7   | 0.0118 |

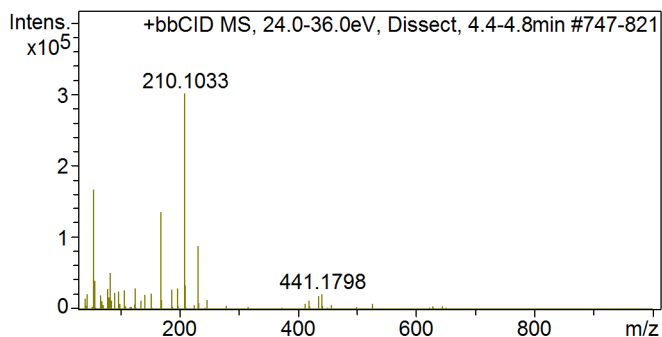

| #  | m/z      | Res.  | S/N   | I      | I %   | FWHM   |
|----|----------|-------|-------|--------|-------|--------|
| 1  | 55.0521  | 17638 | 553.0 | 166962 | 55.3  | 0.0031 |
| 2  | 57.0677  | 17139 | 133.3 | 40237  | 13.3  | 0.0033 |
| 3  | 79.0514  | 19220 | 97.1  | 29311  | 9.7   | 0.0041 |
| 4  | 83.0827  | 19550 | 168.6 | 50899  | 16.9  | 0.0042 |
| 5  | 125.0920 | 23755 | 100.2 | 30255  | 10.0  | 0.0053 |
| 6  | 170.1120 | 28284 | 449.1 | 135606 | 44.9  | 0.0060 |
| 7  | 198.1213 | 29773 | 98.7  | 29786  | 9.9   | 0.0067 |
| 8  | 210.1033 | 30200 | 999.8 | 301863 | 100.0 | 0.0070 |
| 9  | 211.1065 | 28319 | 114.2 | 34496  | 11.4  | 0.0075 |
| 10 | 232.0845 | 31227 | 292.2 | 88211  | 29.2  | 0.0074 |

# Compound Spectrum List Report

## Cmpd 30, Dissect, 4.7 min

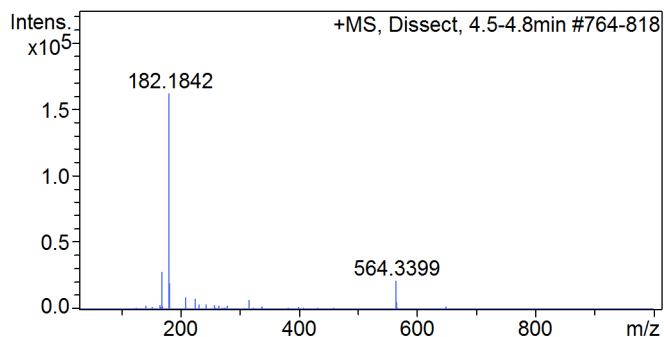

| #  | m/z      | Res.  | S/N   | I      | I %   | FWHM   |
|----|----------|-------|-------|--------|-------|--------|
| 1  | 170.1119 | 29187 | 175.0 | 28436  | 17.6  | 0.0058 |
| 2  | 182.1842 | 29074 | 996.9 | 161963 | 100.0 | 0.0063 |
| 3  | 183.1876 | 26384 | 122.4 | 19879  | 12.3  | 0.0069 |
| 4  | 210.1032 | 30768 | 58.3  | 9464   | 5.8   | 0.0068 |
| 5  | 226.1342 | 29645 | 51.6  | 8385   | 5.2   | 0.0076 |
| 6  | 232.0844 | 29678 | 22.9  | 3713   | 2.3   | 0.0078 |
| 7  | 244.1463 | 30884 | 22.8  | 3697   | 2.3   | 0.0079 |
| 8  | 317.2333 | 31551 | 47.1  | 7654   | 4.7   | 0.0101 |
| 9  | 564.3399 | 31601 | 135.2 | 21965  | 13.6  | 0.0179 |
| 10 | 565.3442 | 29659 | 34.8  | 5656   | 3.5   | 0.0191 |

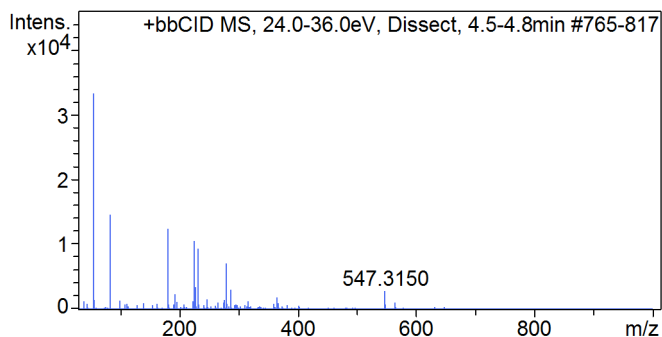

| #  | m/z      | Res.  | S/N   | I     | I %   | FWHM   |
|----|----------|-------|-------|-------|-------|--------|
| 1  | 55.0156  | 16834 | 103.1 | 3445  | 10.3  | 0.0033 |
| 2  | 55.0521  | 17448 | 998.9 | 33360 | 100.0 | 0.0032 |
| 3  | 83.0827  | 19297 | 436.7 | 14585 | 43.7  | 0.0043 |
| 4  | 182.1843 | 28650 | 371.9 | 12420 | 37.2  | 0.0064 |
| 5  | 226.1340 | 29665 | 317.1 | 10591 | 31.7  | 0.0076 |
| 6  | 228.1519 | 28379 | 104.2 | 3479  | 10.4  | 0.0080 |
| 7  | 232.0846 | 31005 | 280.3 | 9362  | 28.1  | 0.0075 |
| 8  | 280.1429 | 30679 | 213.1 | 7116  | 21.3  | 0.0091 |
| 9  | 288.1089 | 30533 | 92.3  | 3082  | 9.2   | 0.0094 |
| 10 | 547.3150 | 32401 | 87.9  | 2935  | 8.8   | 0.0169 |

## Cmpd 31, Dissect, 4.7 min

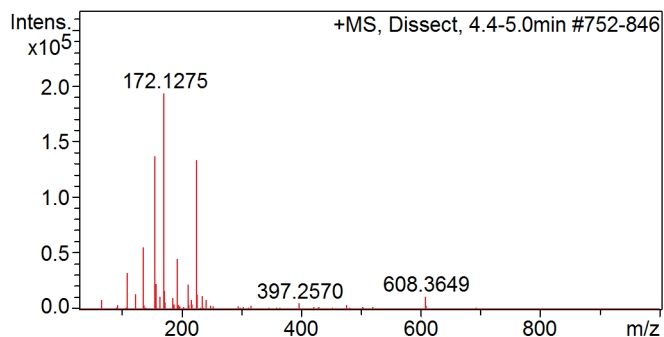

| #  | m/z      | Res.  | S/N   | I      | I %   | FWHM   |
|----|----------|-------|-------|--------|-------|--------|
| 1  | 109.0976 | 21978 | 168.6 | 32589  | 16.9  | 0.0050 |
| 2  | 123.0764 | 23577 | 71.0  | 13711  | 7.1   | 0.0052 |
| 3  | 136.0712 | 24171 | 287.6 | 55584  | 28.8  | 0.0056 |
| 4  | 155.1015 | 27139 | 707.1 | 136646 | 70.7  | 0.0057 |
| 5  | 159.0599 | 26090 | 120.8 | 23335  | 12.1  | 0.0061 |
| 6  | 172.1275 | 28711 | 999.9 | 193213 | 100.0 | 0.0060 |
| 7  | 173.1116 | 28044 | 86.2  | 16657  | 8.6   | 0.0062 |
| 8  | 194.1088 | 28727 | 235.7 | 45550  | 23.6  | 0.0068 |
| 9  | 212.1365 | 28711 | 117.2 | 22646  | 11.7  | 0.0074 |
| 10 | 226.1341 | 29758 | 689.1 | 133155 | 68.9  | 0.0076 |

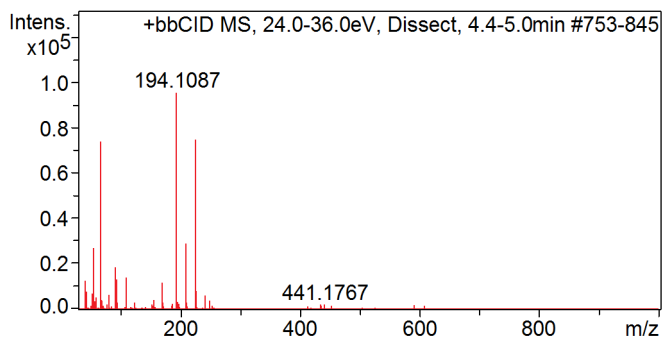

| #  | m/z      | Res.  | S/N   | I     | I %   | FWHM   |
|----|----------|-------|-------|-------|-------|--------|
| 1  | 41.0368  | 15144 | 133.8 | 12781 | 13.4  | 0.0027 |
| 2  | 55.0521  | 17260 | 282.6 | 26993 | 28.3  | 0.0032 |
| 3  | 67.0519  | 17789 | 772.4 | 73779 | 77.4  | 0.0038 |
| 4  | 91.0514  | 19754 | 197.0 | 18816 | 19.7  | 0.0046 |
| 5  | 94.0622  | 19802 | 139.9 | 13366 | 14.0  | 0.0048 |
| 6  | 109.0976 | 21523 | 148.2 | 14160 | 14.8  | 0.0051 |
| 7  | 194.1087 | 29584 | 998.3 | 95353 | 100.0 | 0.0066 |
| 8  | 210.0822 | 29789 | 305.6 | 29190 | 30.6  | 0.0071 |
| 9  | 210.1032 | 29348 | 287.6 | 27471 | 28.8  | 0.0072 |
| 10 | 226.1339 | 29622 | 781.4 | 74642 | 78.3  | 0.0076 |



# Compound Spectrum List Report

## Cmpd 32, Dissect, 4.8 min

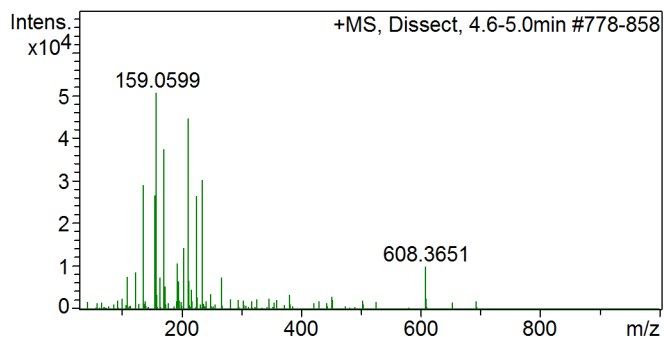

| #  | m/z      | Res.  | S/N   | I     | I %   | FWHM   |
|----|----------|-------|-------|-------|-------|--------|
| 1  | 136.0712 | 24329 | 574.6 | 29078 | 57.5  | 0.0056 |
| 2  | 155.1015 | 26789 | 527.1 | 26676 | 52.7  | 0.0058 |
| 3  | 159.0599 | 26732 | 999.6 | 50588 | 100.0 | 0.0060 |
| 4  | 172.1275 | 28515 | 738.8 | 37389 | 73.9  | 0.0060 |
| 5  | 194.1088 | 28617 | 213.7 | 10816 | 21.4  | 0.0068 |
| 6  | 205.1003 | 28779 | 284.8 | 14414 | 28.5  | 0.0071 |
| 7  | 212.1365 | 29401 | 878.6 | 44465 | 87.9  | 0.0072 |
| 8  | 226.1344 | 29976 | 523.7 | 26504 | 52.4  | 0.0075 |
| 9  | 236.1053 | 30886 | 596.6 | 30192 | 59.7  | 0.0076 |
| 10 | 608.3651 | 31826 | 197.5 | 9997  | 19.8  | 0.0191 |

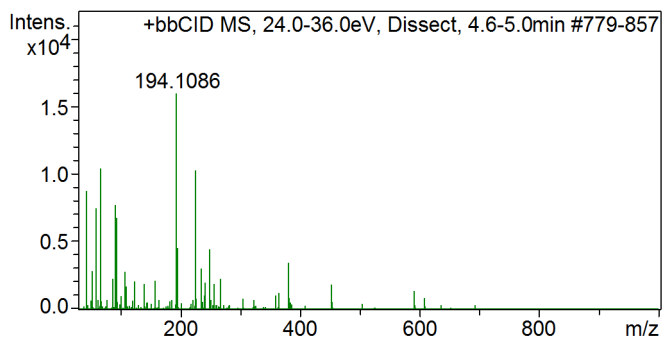

| #  | m/z      | Res.  | S/N   | I     | I %   | FWHM   |
|----|----------|-------|-------|-------|-------|--------|
| 1  | 43.0161  | 15604 | 549.2 | 8773  | 54.9  | 0.0028 |
| 2  | 59.0470  | 17174 | 467.2 | 7463  | 46.7  | 0.0034 |
| 3  | 67.0519  | 17802 | 650.7 | 10395 | 65.1  | 0.0038 |
| 4  | 91.0514  | 20075 | 484.6 | 7740  | 48.5  | 0.0045 |
| 5  | 94.0622  | 20053 | 423.1 | 6759  | 42.3  | 0.0047 |
| 6  | 194.1086 | 29303 | 999.7 | 15970 | 100.0 | 0.0066 |
| 7  | 196.1242 | 27368 | 285.3 | 4558  | 28.5  | 0.0072 |
| 8  | 226.1339 | 30214 | 642.5 | 10263 | 64.3  | 0.0075 |
| 9  | 250.1332 | 30382 | 278.0 | 4440  | 27.8  | 0.0082 |
| 10 | 381.2846 | 30706 | 216.8 | 3462  | 21.7  | 0.0124 |

## Cmpd 33, Dissect, 4.9 min

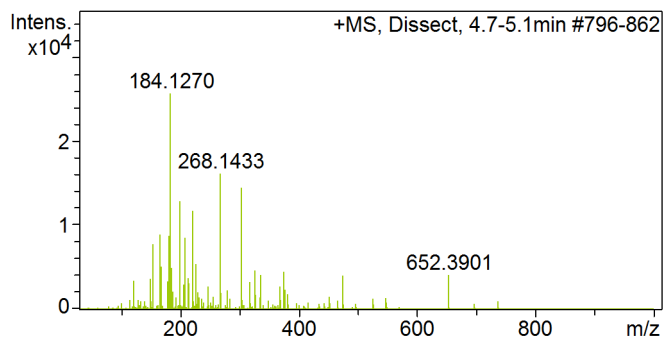

| #  | m/z      | Res.  | S/N   | I     | I %   | FWHM   |
|----|----------|-------|-------|-------|-------|--------|
| 1  | 154.1176 | 25844 | 302.2 | 7781  | 30.2  | 0.0060 |
| 2  | 167.1011 | 27259 | 348.1 | 8964  | 34.8  | 0.0061 |
| 3  | 182.1115 | 27566 | 340.9 | 8778  | 34.1  | 0.0066 |
| 4  | 184.1270 | 28512 | 999.8 | 25744 | 100.0 | 0.0065 |
| 5  | 200.0642 | 29117 | 501.3 | 12909 | 50.1  | 0.0069 |
| 6  | 209.1102 | 28229 | 333.3 | 8583  | 33.3  | 0.0074 |
| 7  | 222.1028 | 29438 | 455.4 | 11726 | 45.5  | 0.0075 |
| 8  | 227.1203 | 30620 | 210.9 | 5431  | 21.1  | 0.0074 |
| 9  | 268.1433 | 31533 | 626.6 | 16135 | 62.7  | 0.0085 |
| 10 | 304.2022 | 32389 | 562.7 | 14489 | 56.3  | 0.0094 |

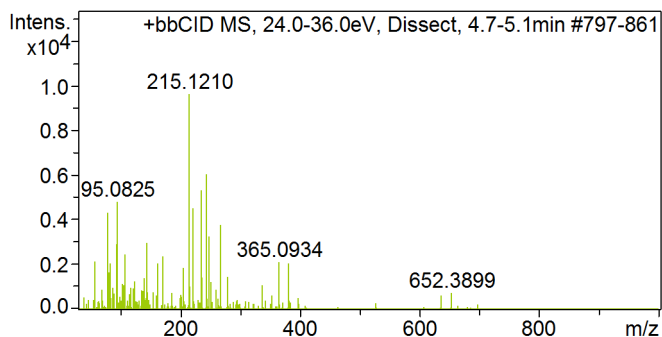

| #  | m/z      | Res.  | S/N   | I    | I %   | FWHM   |
|----|----------|-------|-------|------|-------|--------|
| 1  | 79.0515  | 19125 | 447.7 | 4315 | 44.8  | 0.0041 |
| 2  | 93.0670  | 18431 | 302.8 | 2919 | 30.3  | 0.0050 |
| 3  | 95.0825  | 19953 | 500.4 | 4823 | 50.0  | 0.0048 |
| 4  | 144.0759 | 25099 | 310.4 | 2992 | 31.0  | 0.0057 |
| 5  | 215.1210 | 28739 | 999.8 | 9637 | 100.0 | 0.0075 |
| 6  | 222.1029 | 28278 | 468.0 | 4510 | 46.8  | 0.0079 |
| 7  | 236.1180 | 28931 | 551.9 | 5319 | 55.2  | 0.0082 |
| 8  | 244.0841 | 29917 | 627.6 | 6049 | 62.8  | 0.0082 |
| 9  | 248.1177 | 28075 | 338.8 | 3265 | 33.9  | 0.0088 |
| 10 | 268.1431 | 29765 | 392.5 | 3783 | 39.3  | 0.0090 |

# Compound Spectrum List Report

## Cmpd 34, Dissect, 5.0 min

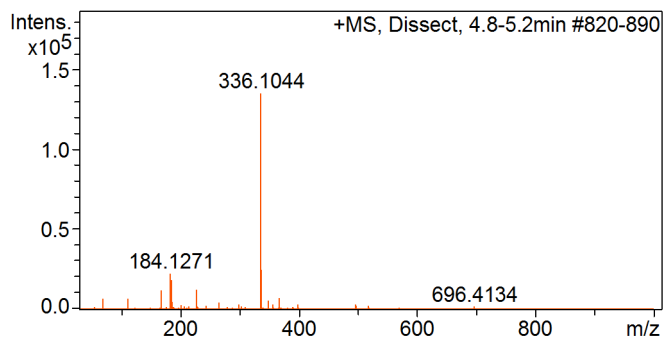

| #  | m/z      | Res.  | S/N   | I      | I %   | FWHM   |
|----|----------|-------|-------|--------|-------|--------|
| 1  | 69.0673  | 17944 | 50.1  | 6794   | 5.0   | 0.0038 |
| 2  | 111.1132 | 22353 | 51.3  | 6963   | 5.2   | 0.0050 |
| 3  | 169.1160 | 25903 | 90.1  | 12219  | 9.1   | 0.0065 |
| 4  | 184.1271 | 28163 | 166.4 | 22561  | 16.7  | 0.0065 |
| 5  | 186.1427 | 28756 | 135.8 | 18416  | 13.6  | 0.0065 |
| 6  | 228.1056 | 30268 | 93.0  | 12605  | 9.3   | 0.0075 |
| 7  | 336.1044 | 33056 | 995.4 | 134972 | 100.0 | 0.0102 |
| 8  | 337.1079 | 31164 | 183.0 | 24808  | 18.4  | 0.0108 |
| 9  | 348.7114 | 34283 | 39.2  | 5313   | 3.9   | 0.0102 |
| 10 | 368.0751 | 32219 | 53.2  | 7219   | 5.3   | 0.0114 |

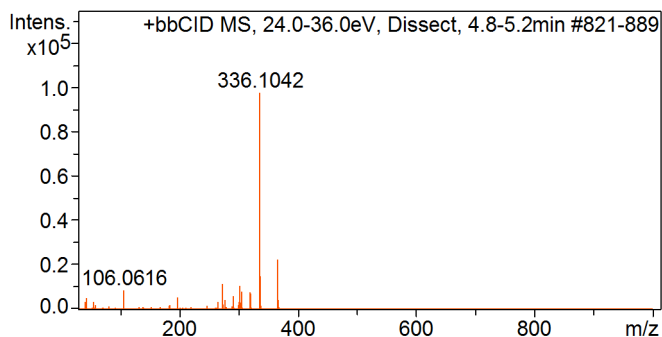

| #  | m/z      | Res.  | S/N   | I     | I %   | FWHM   |
|----|----------|-------|-------|-------|-------|--------|
| 1  | 106.0616 | 22043 | 89.1  | 8713  | 8.9   | 0.0048 |
| 2  | 274.0696 | 31200 | 117.9 | 11529 | 11.8  | 0.0088 |
| 3  | 292.0795 | 31126 | 64.4  | 6303  | 6.5   | 0.0094 |
| 4  | 303.0711 | 30376 | 110.1 | 10772 | 11.0  | 0.0100 |
| 5  | 306.0585 | 30909 | 84.0  | 8218  | 8.4   | 0.0099 |
| 6  | 320.0734 | 32422 | 79.5  | 7779  | 8.0   | 0.0099 |
| 7  | 321.0809 | 31215 | 74.0  | 7241  | 7.4   | 0.0103 |
| 8  | 336.1042 | 34556 | 997.2 | 97524 | 100.0 | 0.0097 |
| 9  | 337.1088 | 27286 | 155.0 | 15159 | 15.5  | 0.0124 |
| 10 | 366.0594 | 31639 | 231.7 | 22658 | 23.2  | 0.0116 |

## Cmpd 35, Dissect, 5.1 min

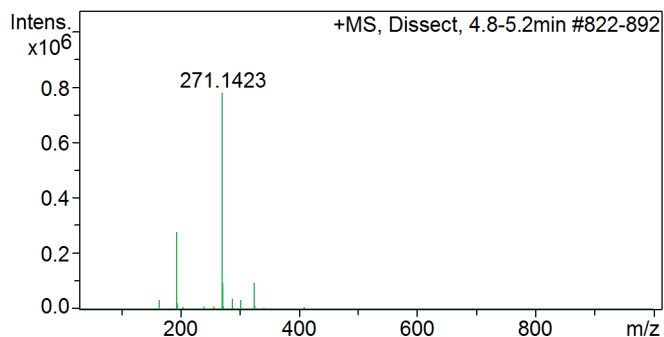

| #  | m/z      | Res.  | S/N   | I      | I %   | FWHM   |
|----|----------|-------|-------|--------|-------|--------|
| 1  | 165.0829 | 26786 | 41.7  | 32739  | 4.2   | 0.0062 |
| 2  | 195.0924 | 30439 | 355.4 | 278937 | 35.8  | 0.0064 |
| 3  | 196.0953 | 23304 | 26.4  | 20753  | 2.7   | 0.0084 |
| 4  | 241.1334 | 29530 | 12.6  | 9923   | 1.3   | 0.0082 |
| 5  | 271.1423 | 35644 | 992.8 | 779146 | 100.0 | 0.0076 |
| 6  | 272.1452 | 29293 | 120.0 | 94158  | 12.1  | 0.0093 |
| 7  | 289.1532 | 29742 | 52.6  | 41275  | 5.3   | 0.0097 |
| 8  | 303.1678 | 32978 | 41.0  | 32148  | 4.1   | 0.0092 |
| 9  | 325.1489 | 33364 | 124.8 | 97960  | 12.6  | 0.0097 |
| 10 | 326.1517 | 27430 | 15.3  | 11971  | 1.5   | 0.0119 |

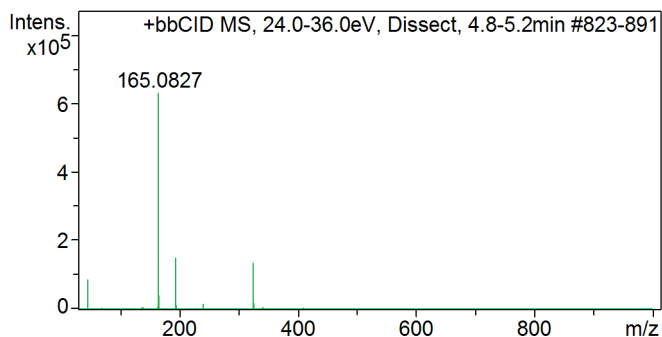

| #  | m/z      | Res.  | S/N   | I      | I %   | FWHM   |
|----|----------|-------|-------|--------|-------|--------|
| 1  | 45.0316  | 15961 | 139.8 | 88229  | 14.0  | 0.0028 |
| 2  | 138.0726 | 24522 | 10.6  | 6672   | 1.1   | 0.0056 |
| 3  | 165.0827 | 29073 | 999.7 | 631127 | 100.0 | 0.0057 |
| 4  | 166.0857 | 23539 | 67.2  | 42440  | 6.7   | 0.0071 |
| 5  | 195.0924 | 30523 | 239.0 | 150879 | 23.9  | 0.0064 |
| 6  | 196.0953 | 23941 | 19.2  | 12105  | 1.9   | 0.0082 |
| 7  | 241.1327 | 30916 | 26.0  | 16399  | 2.6   | 0.0078 |
| 8  | 325.1488 | 33959 | 216.2 | 136465 | 21.6  | 0.0096 |
| 9  | 326.1517 | 29857 | 28.1  | 17763  | 2.8   | 0.0109 |
| 10 | 341.1222 | 30315 | 11.5  | 7269   | 1.2   | 0.0113 |

# Compound Spectrum List Report

## Cmpd 36, Dissect, 5.1 min

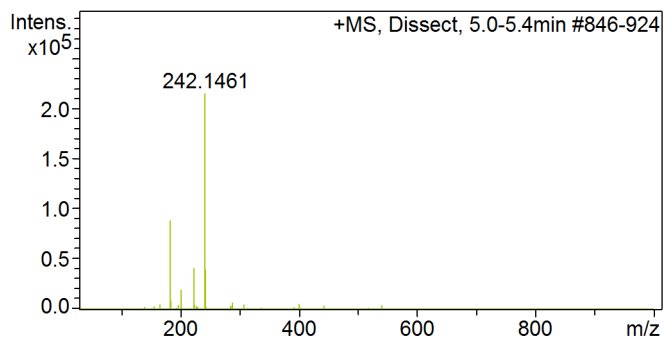

| #  | m/z      | Res.  | S/N   | I      | I %   | FWHM   |
|----|----------|-------|-------|--------|-------|--------|
| 1  | 166.1171 | 26801 | 22.1  | 4765   | 2.2   | 0.0062 |
| 2  | 184.1271 | 29166 | 410.7 | 88561  | 41.1  | 0.0063 |
| 3  | 185.1305 | 26840 | 39.1  | 8441   | 3.9   | 0.0069 |
| 4  | 202.1371 | 29163 | 93.9  | 20247  | 9.4   | 0.0069 |
| 5  | 224.1185 | 30675 | 193.0 | 41623  | 19.3  | 0.0073 |
| 6  | 242.1461 | 31289 | 998.2 | 215256 | 100.0 | 0.0077 |
| 7  | 243.1495 | 31197 | 183.8 | 39631  | 18.4  | 0.0078 |
| 8  | 289.1532 | 32201 | 31.1  | 6709   | 3.1   | 0.0090 |
| 9  | 308.2120 | 30745 | 22.8  | 4910   | 2.3   | 0.0100 |
| 10 | 401.2494 | 34495 | 26.3  | 5669   | 2.6   | 0.0116 |

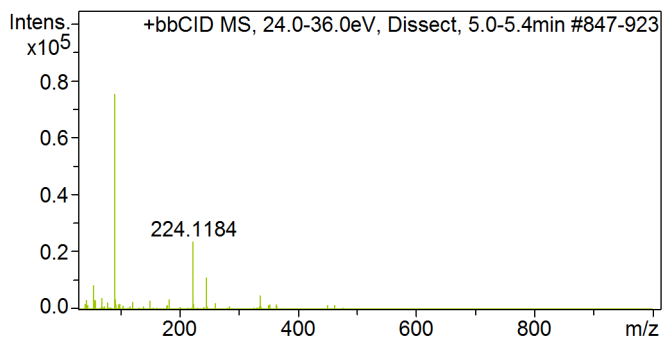

| #  | m/z      | Res.  | S/N   | I     | I %   | FWHM   |
|----|----------|-------|-------|-------|-------|--------|
| 1  | 43.0161  | 15645 | 42.0  | 3162  | 4.2   | 0.0027 |
| 2  | 55.0521  | 17243 | 114.8 | 8652  | 11.5  | 0.0032 |
| 3  | 57.0677  | 17167 | 47.4  | 3568  | 4.7   | 0.0033 |
| 4  | 69.0675  | 17917 | 53.6  | 4041  | 5.4   | 0.0039 |
| 5  | 91.0514  | 20233 | 999.6 | 75313 | 100.0 | 0.0045 |
| 6  | 92.0547  | 18735 | 50.1  | 3771  | 5.0   | 0.0049 |
| 7  | 184.1272 | 28190 | 47.7  | 3595  | 4.8   | 0.0065 |
| 8  | 224.1184 | 31019 | 314.5 | 23698 | 31.5  | 0.0072 |
| 9  | 246.0997 | 29971 | 150.7 | 11356 | 15.1  | 0.0082 |
| 10 | 337.1140 | 29162 | 68.1  | 5130  | 6.8   | 0.0116 |

## Cmpd 37, Dissect, 5.2 min

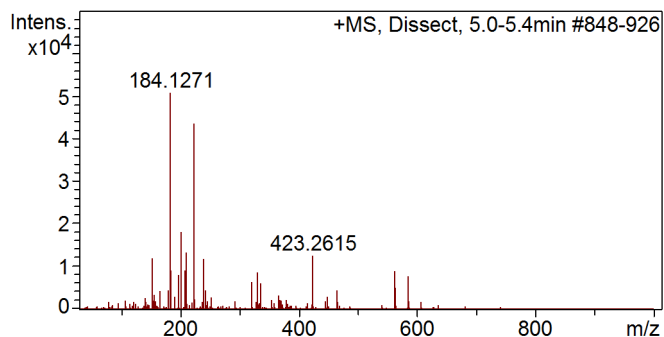

| #  | m/z      | Res.  | S/N   | I     | I %   | FWHM   |
|----|----------|-------|-------|-------|-------|--------|
| 1  | 153.0859 | 26648 | 238.7 | 12113 | 23.9  | 0.0057 |
| 2  | 184.1271 | 29243 | 999.3 | 50710 | 100.0 | 0.0063 |
| 3  | 185.1304 | 27071 | 180.5 | 9161  | 18.1  | 0.0068 |
| 4  | 202.1371 | 29074 | 357.6 | 18149 | 35.8  | 0.0070 |
| 5  | 209.1099 | 27337 | 179.8 | 9125  | 18.0  | 0.0076 |
| 6  | 211.1259 | 28906 | 265.2 | 13458 | 26.5  | 0.0073 |
| 7  | 224.1185 | 30723 | 857.1 | 43498 | 85.8  | 0.0073 |
| 8  | 240.1495 | 29250 | 232.9 | 11821 | 23.3  | 0.0082 |
| 9  | 423.2615 | 34386 | 249.4 | 12658 | 25.0  | 0.0123 |
| 10 | 562.3249 | 33118 | 178.8 | 9074  | 17.9  | 0.0170 |

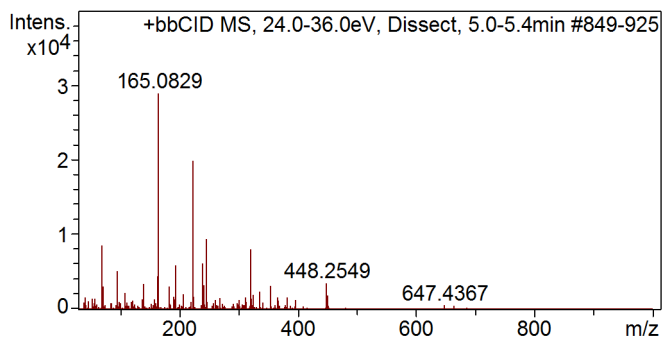

| #  | m/z      | Res.  | S/N   | I     | I %   | FWHM   |
|----|----------|-------|-------|-------|-------|--------|
| 1  | 69.0675  | 17758 | 297.0 | 8592  | 29.7  | 0.0039 |
| 2  | 95.0463  | 19860 | 179.9 | 5203  | 18.0  | 0.0048 |
| 3  | 164.9150 | 27757 | 154.3 | 4463  | 15.4  | 0.0059 |
| 4  | 165.0829 | 27516 | 999.9 | 28921 | 100.0 | 0.0060 |
| 5  | 195.0924 | 29287 | 205.9 | 5957  | 20.6  | 0.0067 |
| 6  | 224.1184 | 31035 | 686.9 | 19867 | 68.7  | 0.0072 |
| 7  | 240.0916 | 28141 | 138.5 | 4006  | 13.9  | 0.0085 |
| 8  | 240.1492 | 29906 | 213.2 | 6168  | 21.3  | 0.0080 |
| 9  | 246.0997 | 30089 | 327.2 | 9463  | 32.7  | 0.0082 |
| 10 | 321.1203 | 31691 | 278.1 | 8044  | 27.8  | 0.0101 |

# Compound Spectrum List Report

## Cmpd 38, Dissect, 5.4 min

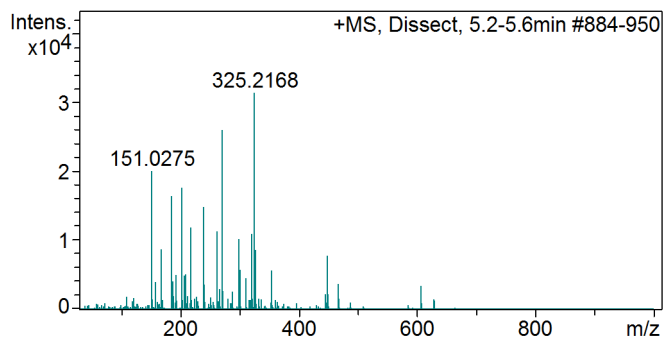

| #  | m/z      | Res.  | S/N   | I     | I %   | FWHM   |
|----|----------|-------|-------|-------|-------|--------|
| 1  | 151.0275 | 26129 | 638.5 | 20040 | 63.9  | 0.0058 |
| 2  | 186.1428 | 28100 | 522.2 | 16390 | 52.2  | 0.0066 |
| 3  | 203.1325 | 28823 | 560.6 | 17594 | 56.1  | 0.0070 |
| 4  | 218.2044 | 29026 | 379.2 | 11902 | 37.9  | 0.0075 |
| 5  | 240.1492 | 29937 | 472.9 | 14840 | 47.3  | 0.0080 |
| 6  | 263.1040 | 31467 | 359.8 | 11292 | 36.0  | 0.0084 |
| 7  | 271.1425 | 31715 | 825.2 | 25900 | 82.6  | 0.0085 |
| 8  | 299.1374 | 28903 | 325.2 | 10208 | 32.5  | 0.0103 |
| 9  | 321.1203 | 32076 | 348.2 | 10929 | 34.8  | 0.0100 |
| 10 | 325.2168 | 33041 | 999.6 | 31372 | 100.0 | 0.0098 |

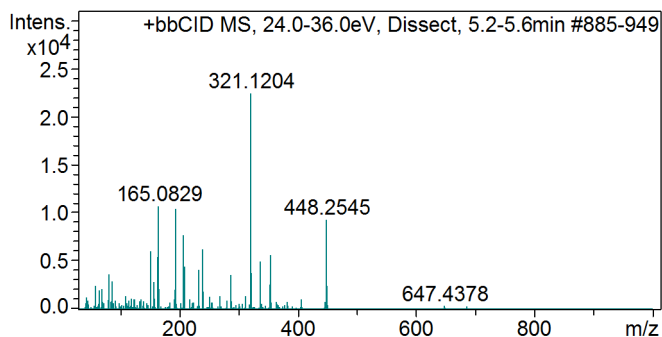

| #  | m/z      | Res.  | S/N   | I     | I %   | FWHM   |
|----|----------|-------|-------|-------|-------|--------|
| 1  | 151.0275 | 26142 | 270.4 | 6080  | 27.1  | 0.0058 |
| 2  | 164.9150 | 27801 | 243.7 | 5479  | 24.4  | 0.0059 |
| 3  | 165.0829 | 27208 | 475.6 | 10693 | 47.6  | 0.0061 |
| 4  | 195.0925 | 28692 | 466.0 | 10476 | 46.7  | 0.0068 |
| 5  | 208.1241 | 28588 | 342.7 | 7705  | 34.3  | 0.0073 |
| 6  | 240.1492 | 30296 | 280.0 | 6295  | 28.0  | 0.0079 |
| 7  | 321.1204 | 31793 | 998.3 | 22445 | 100.0 | 0.0101 |
| 8  | 337.0937 | 29948 | 223.7 | 5029  | 22.4  | 0.0113 |
| 9  | 355.1581 | 30174 | 252.6 | 5678  | 25.3  | 0.0118 |
| 10 | 448.2545 | 32683 | 413.5 | 9297  | 41.4  | 0.0137 |

## Cmpd 39, Dissect, 5.5 min

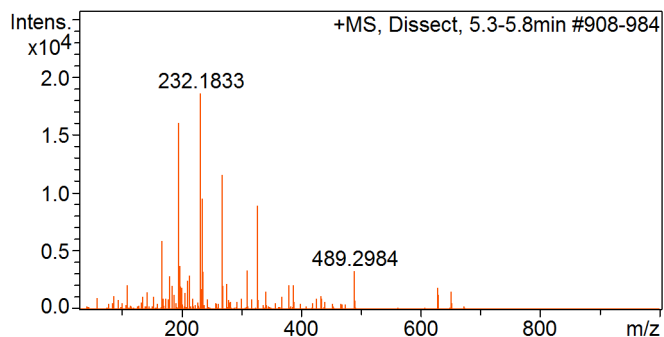

| #  | m/z      | Res.  | S/N   | I     | I %   | FWHM   |
|----|----------|-------|-------|-------|-------|--------|
| 1  | 168.1329 | 26768 | 316.8 | 5894  | 31.7  | 0.0063 |
| 2  | 196.1268 | 27760 | 859.7 | 15996 | 86.0  | 0.0071 |
| 3  | 198.1425 | 29379 | 203.4 | 3785  | 20.3  | 0.0067 |
| 4  | 232.1833 | 30250 | 999.6 | 18601 | 100.0 | 0.0077 |
| 5  | 236.1184 | 29545 | 513.5 | 9555  | 51.4  | 0.0080 |
| 6  | 237.0681 | 30688 | 174.6 | 3249  | 17.5  | 0.0077 |
| 7  | 269.1927 | 31062 | 622.0 | 11574 | 62.2  | 0.0087 |
| 8  | 311.0040 | 31824 | 182.8 | 3401  | 18.3  | 0.0098 |
| 9  | 328.0299 | 33476 | 480.0 | 8932  | 48.0  | 0.0098 |
| 10 | 489.2984 | 33823 | 178.3 | 3317  | 17.8  | 0.0145 |

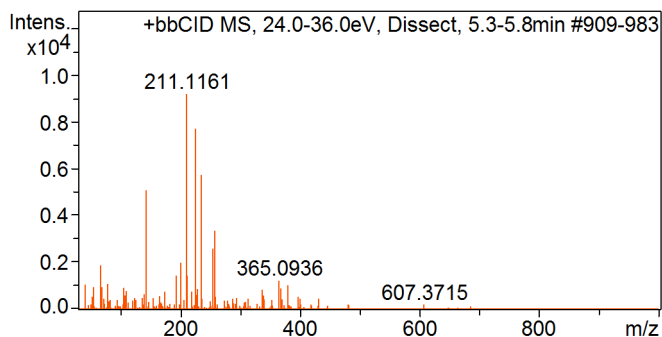

| #  | m/z      | Res.  | S/N   | I    | I %   | FWHM   |
|----|----------|-------|-------|------|-------|--------|
| 1  | 67.0519  | 17419 | 204.4 | 1883 | 20.5  | 0.0038 |
| 2  | 143.1019 | 24525 | 551.4 | 5078 | 55.2  | 0.0058 |
| 3  | 202.0366 | 29289 | 218.5 | 2013 | 21.9  | 0.0069 |
| 4  | 211.0869 | 28846 | 162.2 | 1493 | 16.2  | 0.0073 |
| 5  | 211.1161 | 29662 | 999.5 | 9204 | 100.0 | 0.0071 |
| 6  | 212.1194 | 24779 | 158.9 | 1464 | 15.9  | 0.0086 |
| 7  | 226.1391 | 29904 | 835.1 | 7690 | 83.5  | 0.0076 |
| 8  | 236.1181 | 30369 | 624.4 | 5750 | 62.5  | 0.0078 |
| 9  | 255.0494 | 29823 | 283.1 | 2607 | 28.3  | 0.0086 |
| 10 | 258.0993 | 29431 | 365.7 | 3367 | 36.6  | 0.0088 |

# Compound Spectrum List Report

## Cmpd 40, Dissect, 5.6 min

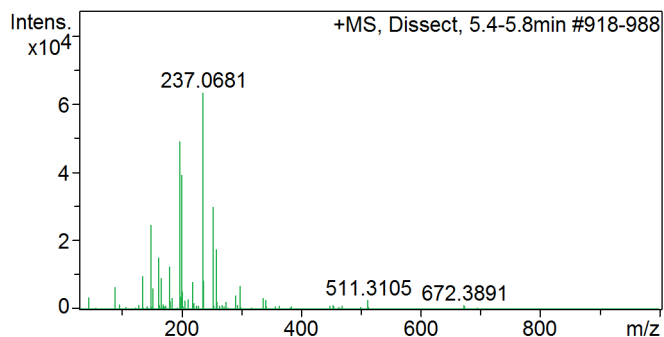

| #  | m/z      | Res.  | S/N   | I     | I %   | FWHM   |
|----|----------|-------|-------|-------|-------|--------|
| 1  | 135.1124 | 24428 | 154.3 | 9804  | 15.5  | 0.0055 |
| 2  | 149.0184 | 26093 | 389.0 | 24720 | 39.0  | 0.0057 |
| 3  | 163.1275 | 26916 | 238.1 | 15132 | 23.9  | 0.0061 |
| 4  | 167.1010 | 27194 | 145.2 | 9226  | 14.6  | 0.0061 |
| 5  | 181.1164 | 26965 | 196.9 | 12511 | 19.8  | 0.0067 |
| 6  | 198.1424 | 29445 | 771.8 | 49053 | 77.5  | 0.0067 |
| 7  | 202.0368 | 29762 | 618.0 | 39276 | 62.0  | 0.0068 |
| 8  | 237.0681 | 30888 | 996.4 | 63327 | 100.0 | 0.0077 |
| 9  | 254.0943 | 31334 | 472.5 | 30031 | 47.4  | 0.0081 |
| 10 | 259.0494 | 30905 | 278.2 | 17681 | 27.9  | 0.0084 |

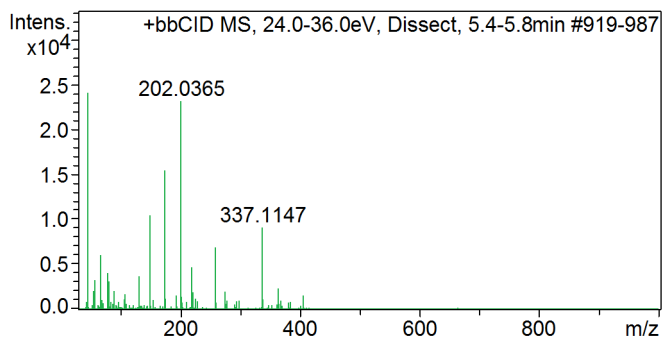

| #  | m/z      | Res.  | S/N   | I     | I %   | FWHM   |
|----|----------|-------|-------|-------|-------|--------|
| 1  | 45.0317  | 15831 | 998.6 | 24099 | 100.0 | 0.0028 |
| 2  | 67.0519  | 17459 | 251.9 | 6079  | 25.2  | 0.0038 |
| 3  | 79.0515  | 18908 | 168.3 | 4063  | 16.9  | 0.0042 |
| 4  | 131.0560 | 24125 | 154.4 | 3726  | 15.5  | 0.0054 |
| 5  | 149.0184 | 25625 | 435.1 | 10502 | 43.6  | 0.0058 |
| 6  | 175.0267 | 27732 | 639.0 | 15422 | 64.0  | 0.0063 |
| 7  | 202.0365 | 29611 | 962.0 | 23216 | 96.3  | 0.0068 |
| 8  | 220.1238 | 29045 | 196.9 | 4752  | 19.7  | 0.0076 |
| 9  | 259.0493 | 30712 | 286.5 | 6914  | 28.7  | 0.0084 |
| 10 | 337.1147 | 31873 | 378.6 | 9137  | 37.9  | 0.0106 |

## Cmpd 41, Dissect, 5.7 min

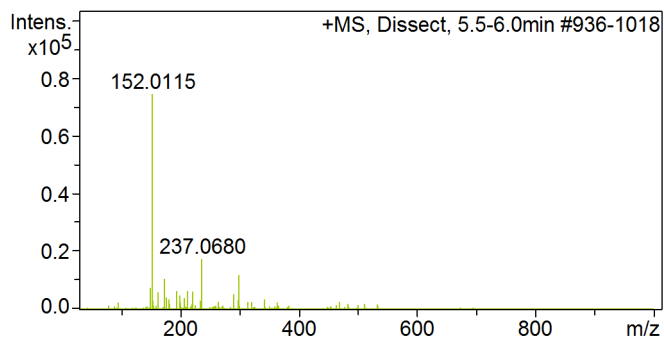

| #  | m/z      | Res.  | S/N   | I     | I %   | FWHM   |
|----|----------|-------|-------|-------|-------|--------|
| 1  | 149.0186 | 25950 | 102.2 | 7633  | 10.2  | 0.0057 |
| 2  | 152.0115 | 26752 | 999.4 | 74647 | 100.0 | 0.0057 |
| 3  | 152.1100 | 25672 | 81.9  | 6116  | 8.2   | 0.0059 |
| 4  | 163.1275 | 26703 | 81.6  | 6093  | 8.2   | 0.0061 |
| 5  | 173.9926 | 27267 | 142.1 | 10612 | 14.2  | 0.0064 |
| 6  | 195.1316 | 28111 | 86.7  | 6474  | 8.7   | 0.0069 |
| 7  | 213.1416 | 28599 | 88.4  | 6604  | 8.8   | 0.0075 |
| 8  | 222.1394 | 27391 | 84.5  | 6315  | 8.5   | 0.0081 |
| 9  | 237.0680 | 29823 | 235.5 | 17594 | 23.6  | 0.0079 |
| 10 | 299.2233 | 32397 | 160.6 | 11999 | 16.1  | 0.0092 |

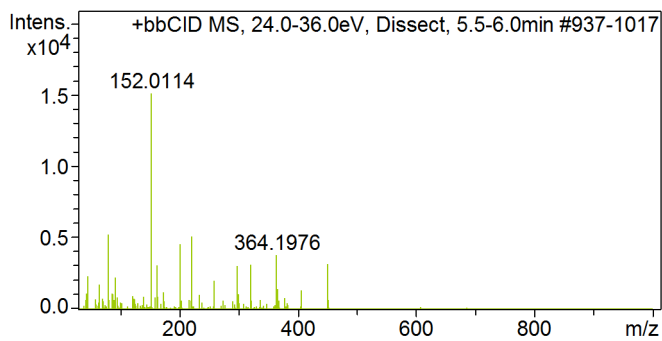

| #  | m/z      | Res.  | S/N   | I     | I %   | FWHM   |
|----|----------|-------|-------|-------|-------|--------|
| 1  | 45.0316  | 15793 | 155.5 | 2350  | 15.6  | 0.0029 |
| 2  | 80.0468  | 19243 | 346.4 | 5235  | 34.7  | 0.0042 |
| 3  | 152.0114 | 25897 | 999.8 | 15108 | 100.0 | 0.0059 |
| 4  | 163.0674 | 26395 | 204.6 | 3092  | 20.5  | 0.0062 |
| 5  | 202.0366 | 29621 | 301.5 | 4556  | 30.2  | 0.0068 |
| 6  | 222.1391 | 28624 | 338.7 | 5118  | 33.9  | 0.0078 |
| 7  | 298.9113 | 31575 | 202.4 | 3058  | 20.2  | 0.0095 |
| 8  | 321.1203 | 31181 | 207.7 | 3139  | 20.8  | 0.0103 |
| 9  | 364.1976 | 30602 | 252.6 | 3818  | 25.3  | 0.0119 |
| 10 | 451.1434 | 30931 | 211.7 | 3199  | 21.2  | 0.0146 |

# Compound Spectrum List Report

## Cmpd 42, Dissect, 5.7 min

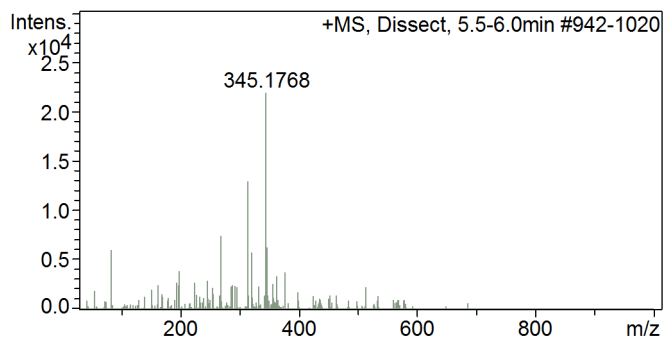

| #  | m/z      | Res.  | S/N   | I     | I %   | FWHM   |
|----|----------|-------|-------|-------|-------|--------|
| 1  | 83.0463  | 19048 | 275.6 | 6048  | 27.6  | 0.0044 |
| 2  | 199.1260 | 25704 | 177.6 | 3897  | 17.8  | 0.0077 |
| 3  | 199.1403 | 22489 | 179.2 | 3933  | 17.9  | 0.0089 |
| 4  | 269.1271 | 29531 | 323.3 | 7095  | 32.4  | 0.0091 |
| 5  | 269.1658 | 28875 | 338.9 | 7437  | 33.9  | 0.0093 |
| 6  | 315.1673 | 31713 | 590.4 | 12957 | 59.1  | 0.0099 |
| 7  | 321.1205 | 31231 | 264.3 | 5801  | 26.5  | 0.0103 |
| 8  | 345.1768 | 31509 | 998.5 | 21914 | 100.0 | 0.0110 |
| 9  | 347.2609 | 33855 | 287.9 | 6319  | 28.8  | 0.0103 |
| 10 | 377.2023 | 31983 | 171.9 | 3773  | 17.2  | 0.0118 |

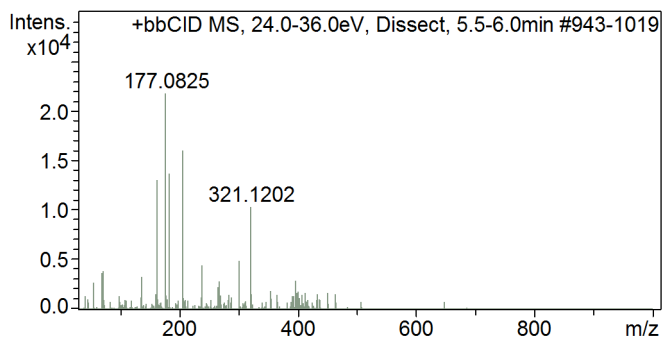

| #  | m/z      | Res.  | S/N   | I     | I %   | FWHM   |
|----|----------|-------|-------|-------|-------|--------|
| 1  | 69.0673  | 17929 | 170.1 | 3712  | 17.0  | 0.0039 |
| 2  | 72.0418  | 18778 | 179.8 | 3923  | 18.0  | 0.0038 |
| 3  | 163.0334 | 26097 | 546.6 | 11925 | 54.7  | 0.0062 |
| 4  | 163.0673 | 26491 | 597.0 | 13025 | 59.7  | 0.0062 |
| 5  | 177.0825 | 27575 | 999.7 | 21809 | 100.0 | 0.0064 |
| 6  | 184.0933 | 27363 | 628.2 | 13705 | 62.8  | 0.0067 |
| 7  | 207.0921 | 29472 | 732.1 | 15971 | 73.2  | 0.0070 |
| 8  | 239.1174 | 28817 | 206.5 | 4504  | 20.7  | 0.0083 |
| 9  | 302.2046 | 32143 | 226.1 | 4932  | 22.6  | 0.0094 |
| 10 | 321.1202 | 31136 | 473.5 | 10330 | 47.4  | 0.0103 |

## Cmpd 43, Dissect, 5.8 min

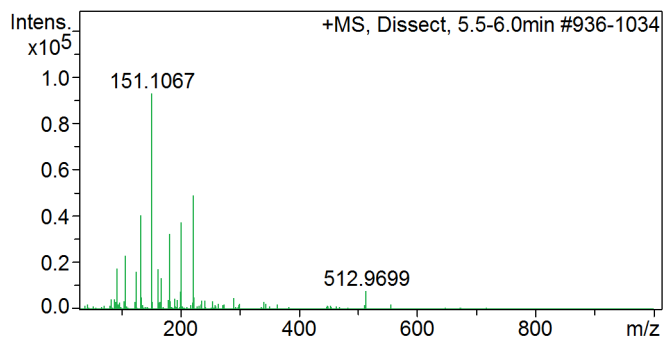

| #  | m/z      | Res.  | S/N   | I     | I %   | FWHM   |
|----|----------|-------|-------|-------|-------|--------|
| 1  | 93.0669  | 18907 | 189.3 | 17625 | 19.0  | 0.0049 |
| 2  | 107.0822 | 21666 | 250.6 | 23328 | 25.1  | 0.0049 |
| 3  | 125.0919 | 23590 | 176.5 | 16428 | 17.7  | 0.0053 |
| 4  | 133.0968 | 24186 | 435.7 | 40554 | 43.7  | 0.0055 |
| 5  | 151.1067 | 26654 | 997.7 | 92870 | 100.0 | 0.0057 |
| 6  | 163.0335 | 26990 | 186.8 | 17383 | 18.7  | 0.0060 |
| 7  | 169.1167 | 26754 | 144.9 | 13491 | 14.5  | 0.0063 |
| 8  | 183.1318 | 28066 | 350.7 | 32645 | 35.2  | 0.0065 |
| 9  | 202.1736 | 28638 | 401.5 | 37374 | 40.2  | 0.0071 |
| 10 | 223.1233 | 30298 | 526.7 | 49026 | 52.8  | 0.0074 |

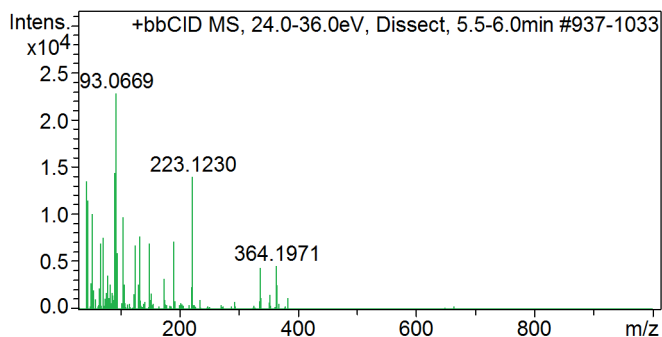

| #  | m/z      | Res.  | S/N   | I     | I %   | FWHM   |
|----|----------|-------|-------|-------|-------|--------|
| 1  | 43.0160  | 15552 | 590.7 | 13494 | 59.1  | 0.0028 |
| 2  | 45.0316  | 15868 | 503.9 | 11510 | 50.4  | 0.0028 |
| 3  | 53.0364  | 16649 | 441.3 | 10081 | 44.1  | 0.0032 |
| 4  | 71.0466  | 18259 | 331.9 | 7582  | 33.2  | 0.0039 |
| 5  | 91.0512  | 19606 | 630.7 | 14407 | 63.1  | 0.0046 |
| 6  | 93.0669  | 19485 | 999.8 | 22840 | 100.0 | 0.0048 |
| 7  | 105.0665 | 21144 | 426.2 | 9737  | 42.6  | 0.0050 |
| 8  | 133.0967 | 24145 | 337.7 | 7715  | 33.8  | 0.0055 |
| 9  | 191.0981 | 27686 | 314.1 | 7176  | 31.4  | 0.0069 |
| 10 | 223.1230 | 29846 | 612.7 | 13996 | 61.3  | 0.0075 |

# Compound Spectrum List Report

## Cmpd 44, Dissect, 5.8 min

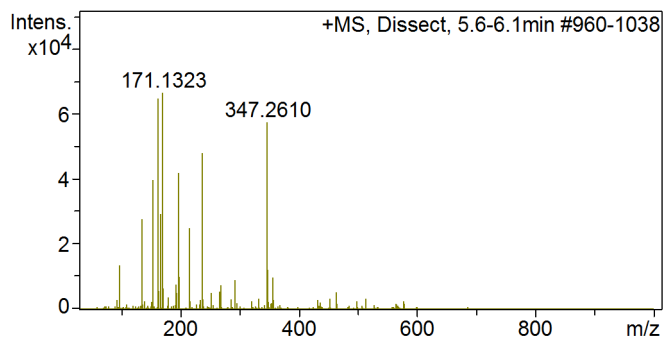

| #  | m/z      | Res.  | S/N   | I     | I %   | FWHM   |
|----|----------|-------|-------|-------|-------|--------|
| 1  | 135.1124 | 24506 | 416.1 | 27704 | 41.7  | 0.0055 |
| 2  | 153.1223 | 26152 | 597.0 | 39745 | 59.8  | 0.0059 |
| 3  | 163.0336 | 26916 | 973.2 | 64797 | 97.5  | 0.0061 |
| 4  | 167.9880 | 27662 | 440.1 | 29302 | 44.1  | 0.0061 |
| 5  | 168.1326 | 27231 | 262.1 | 17451 | 26.2  | 0.0062 |
| 6  | 171.1323 | 27939 | 998.5 | 66480 | 100.0 | 0.0061 |
| 7  | 198.1424 | 29320 | 628.6 | 41854 | 63.0  | 0.0068 |
| 8  | 216.1525 | 29566 | 375.8 | 25018 | 37.6  | 0.0073 |
| 9  | 238.1340 | 30271 | 719.2 | 47885 | 72.0  | 0.0079 |
| 10 | 347.2610 | 34445 | 860.4 | 57286 | 86.2  | 0.0101 |

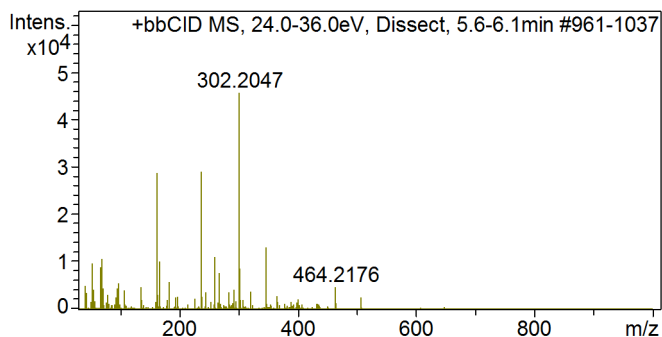

| #  | m/z      | Res.  | S/N   | I     | I %   | FWHM   |
|----|----------|-------|-------|-------|-------|--------|
| 1  | 53.0365  | 16720 | 212.2 | 9693  | 21.2  | 0.0032 |
| 2  | 67.0519  | 17219 | 194.8 | 8895  | 19.5  | 0.0039 |
| 3  | 69.0674  | 17730 | 234.1 | 10692 | 23.4  | 0.0039 |
| 4  | 163.0335 | 26570 | 627.7 | 28669 | 62.8  | 0.0061 |
| 5  | 167.9880 | 27201 | 222.8 | 10176 | 22.3  | 0.0062 |
| 6  | 238.1336 | 30833 | 635.6 | 29029 | 63.6  | 0.0077 |
| 7  | 260.1150 | 30225 | 242.7 | 11086 | 24.3  | 0.0086 |
| 8  | 302.2047 | 32723 | 999.8 | 45665 | 100.0 | 0.0092 |
| 9  | 303.2069 | 30275 | 188.7 | 8617  | 18.9  | 0.0100 |
| 10 | 347.2610 | 33367 | 286.2 | 13070 | 28.6  | 0.0104 |

## Cmpd 45, Dissect, 5.9 min

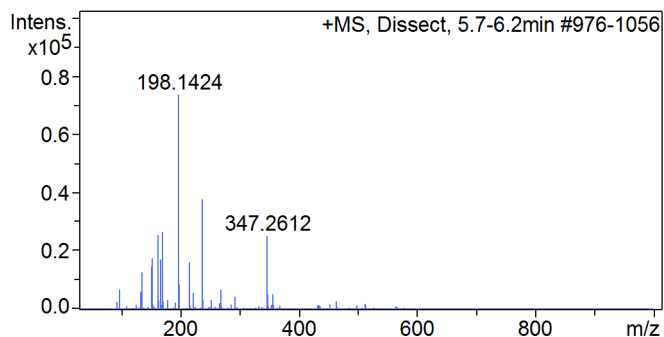

| #  | m/z      | Res.  | S/N   | I     | I %   | FWHM   |
|----|----------|-------|-------|-------|-------|--------|
| 1  | 135.1124 | 24322 | 173.2 | 12752 | 17.3  | 0.0056 |
| 2  | 151.1068 | 25987 | 200.1 | 14730 | 20.0  | 0.0058 |
| 3  | 153.1223 | 26222 | 240.2 | 17689 | 24.0  | 0.0058 |
| 4  | 163.0336 | 26412 | 345.2 | 25419 | 34.5  | 0.0062 |
| 5  | 167.9880 | 28015 | 234.2 | 17243 | 23.4  | 0.0060 |
| 6  | 171.1323 | 27585 | 361.0 | 26579 | 36.1  | 0.0062 |
| 7  | 198.1424 | 29691 | 999.7 | 73603 | 100.0 | 0.0067 |
| 8  | 216.1525 | 29467 | 220.6 | 16245 | 22.1  | 0.0073 |
| 9  | 238.1338 | 30931 | 514.0 | 37843 | 51.4  | 0.0077 |
| 10 | 347.2612 | 33680 | 344.8 | 25389 | 34.5  | 0.0103 |

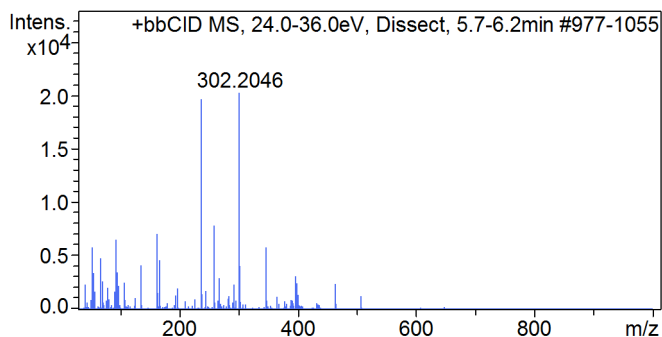

| #  | m/z      | Res.  | S/N   | I     | I %   | FWHM   |
|----|----------|-------|-------|-------|-------|--------|
| 1  | 53.0365  | 16886 | 286.9 | 5807  | 28.7  | 0.0031 |
| 2  | 67.0519  | 17099 | 235.8 | 4773  | 23.6  | 0.0039 |
| 3  | 93.0670  | 19826 | 321.9 | 6515  | 32.2  | 0.0047 |
| 4  | 135.0093 | 24679 | 203.8 | 4125  | 20.4  | 0.0055 |
| 5  | 163.0336 | 26507 | 350.1 | 7086  | 35.0  | 0.0062 |
| 6  | 167.9881 | 27183 | 227.5 | 4606  | 22.8  | 0.0062 |
| 7  | 238.1336 | 31292 | 972.4 | 19682 | 97.3  | 0.0076 |
| 8  | 260.1148 | 30886 | 386.1 | 7815  | 38.6  | 0.0084 |
| 9  | 302.2046 | 32587 | 999.6 | 20234 | 100.0 | 0.0093 |
| 10 | 347.2609 | 32095 | 287.7 | 5823  | 28.8  | 0.0108 |

# Compound Spectrum List Report

## Cmpd 46, Dissect, 6.0 min

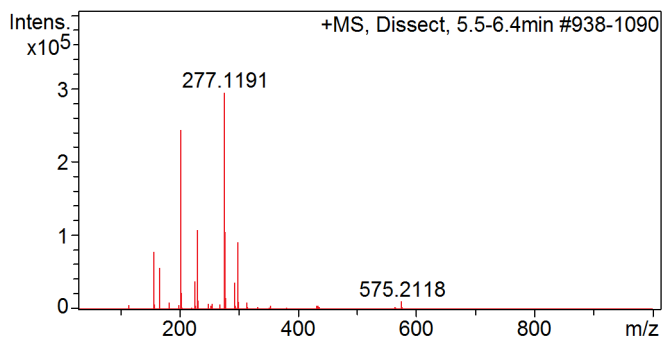

| #  | m/z      | Res.  | S/N   | I      | I %   | FWHM   |
|----|----------|-------|-------|--------|-------|--------|
| 1  | 157.0444 | 27003 | 266.5 | 78739  | 26.8  | 0.0058 |
| 2  | 167.9881 | 27777 | 193.0 | 57036  | 19.4  | 0.0060 |
| 3  | 203.0847 | 31669 | 822.5 | 243008 | 82.6  | 0.0064 |
| 4  | 204.0882 | 28447 | 78.9  | 23312  | 7.9   | 0.0072 |
| 5  | 227.1469 | 30406 | 130.2 | 38459  | 13.1  | 0.0075 |
| 6  | 231.0788 | 31775 | 365.4 | 107958 | 36.7  | 0.0073 |
| 7  | 277.1191 | 36730 | 995.6 | 294161 | 100.0 | 0.0075 |
| 8  | 278.1227 | 33041 | 357.9 | 105753 | 36.0  | 0.0084 |
| 9  | 294.1452 | 32718 | 125.3 | 37032  | 12.6  | 0.0090 |
| 10 | 299.1004 | 33974 | 308.8 | 91226  | 31.0  | 0.0088 |

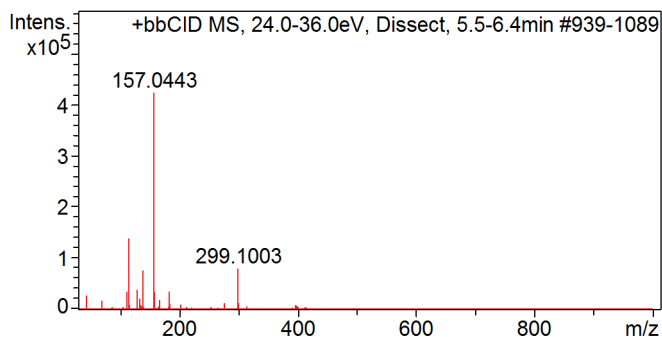

| #  | m/z      | Res.  | S/N   | I      | I %   | FWHM   |
|----|----------|-------|-------|--------|-------|--------|
| 1  | 43.0161  | 15725 | 66.5  | 28399  | 6.7   | 0.0027 |
| 2  | 111.0040 | 23051 | 84.1  | 35925  | 8.5   | 0.0048 |
| 3  | 115.0351 | 24085 | 324.6 | 138682 | 32.7  | 0.0048 |
| 4  | 129.0140 | 24484 | 91.9  | 39260  | 9.3   | 0.0053 |
| 5  | 133.0455 | 22949 | 49.9  | 21319  | 5.0   | 0.0058 |
| 6  | 138.9980 | 26246 | 178.4 | 76226  | 18.0  | 0.0053 |
| 7  | 157.0443 | 29115 | 991.5 | 423617 | 100.0 | 0.0054 |
| 8  | 158.0477 | 27016 | 80.7  | 34462  | 8.1   | 0.0059 |
| 9  | 184.0934 | 28620 | 84.5  | 36101  | 8.5   | 0.0064 |
| 10 | 299.1003 | 32645 | 187.9 | 80265  | 18.9  | 0.0092 |

## Cmpd 47, Dissect, 6.1 min

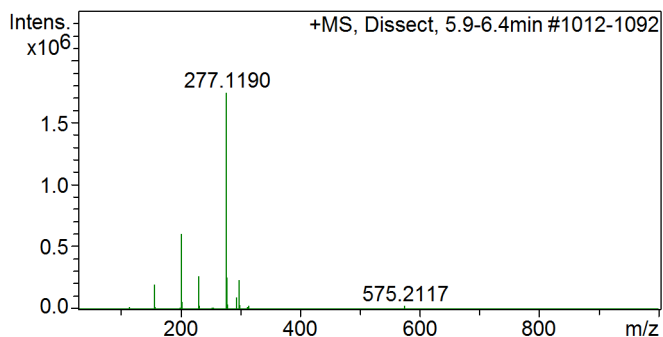

| #  | m/z      | Res.  | S/N   | I       | I %   | FWHM   |
|----|----------|-------|-------|---------|-------|--------|
| 1  | 157.0444 | 27173 | 108.0 | 203257  | 11.7  | 0.0058 |
| 2  | 203.0847 | 32088 | 323.3 | 608396  | 34.9  | 0.0063 |
| 3  | 204.0881 | 28520 | 31.2  | 58672   | 3.4   | 0.0072 |
| 4  | 231.0787 | 32244 | 144.2 | 271351  | 15.6  | 0.0072 |
| 5  | 277.1190 | 37747 | 925.1 | 1740808 | 100.0 | 0.0073 |
| 6  | 278.1226 | 33440 | 137.9 | 259479  | 14.9  | 0.0083 |
| 7  | 279.1243 | 28796 | 21.4  | 40209   | 2.3   | 0.0097 |
| 8  | 294.1452 | 32906 | 52.1  | 98100   | 5.6   | 0.0089 |
| 9  | 299.1004 | 33929 | 125.7 | 236546  | 13.6  | 0.0088 |
| 10 | 300.1038 | 31913 | 16.5  | 31016   | 1.8   | 0.0094 |

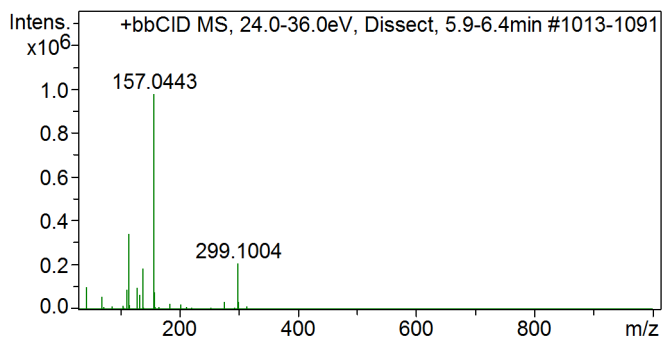

| #  | m/z      | Res.  | S/N   | I      | I %   | FWHM   |
|----|----------|-------|-------|--------|-------|--------|
| 1  | 43.0161  | 15935 | 103.8 | 102455 | 10.5  | 0.0027 |
| 2  | 68.9946  | 18247 | 60.3  | 59587  | 6.1   | 0.0038 |
| 3  | 111.0040 | 22955 | 92.7  | 91540  | 9.4   | 0.0048 |
| 4  | 115.0351 | 24218 | 348.5 | 344081 | 35.2  | 0.0047 |
| 5  | 129.0140 | 24558 | 101.0 | 99696  | 10.2  | 0.0053 |
| 6  | 133.0455 | 22998 | 70.1  | 69247  | 7.1   | 0.0058 |
| 7  | 138.9980 | 26337 | 189.4 | 186962 | 19.1  | 0.0053 |
| 8  | 157.0443 | 29362 | 989.1 | 976597 | 100.0 | 0.0053 |
| 9  | 158.0477 | 27161 | 82.1  | 81029  | 8.3   | 0.0058 |
| 10 | 299.1004 | 32726 | 211.4 | 208681 | 21.4  | 0.0091 |



# Compound Spectrum List Report

## Cmpd 48, Dissect, 6.2 min

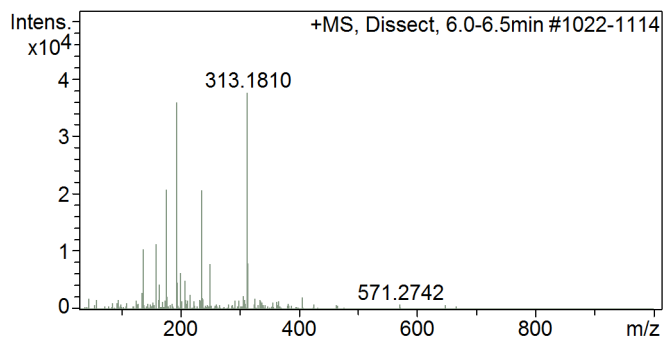

| #  | m/z      | Res.  | S/N   | I     | I %   | FWHM   |
|----|----------|-------|-------|-------|-------|--------|
| 1  | 137.0916 | 24960 | 277.8 | 10447 | 27.8  | 0.0055 |
| 2  | 159.1115 | 26420 | 300.6 | 11306 | 30.1  | 0.0060 |
| 3  | 177.1214 | 27615 | 551.5 | 20741 | 55.2  | 0.0064 |
| 4  | 195.0952 | 28507 | 494.5 | 18597 | 49.5  | 0.0068 |
| 5  | 195.1315 | 28697 | 951.8 | 35791 | 95.3  | 0.0068 |
| 6  | 237.1409 | 29632 | 549.7 | 20671 | 55.0  | 0.0080 |
| 7  | 251.1560 | 29910 | 209.4 | 7875  | 21.0  | 0.0084 |
| 8  | 313.1810 | 33185 | 998.7 | 37556 | 100.0 | 0.0094 |
| 9  | 313.2386 | 31088 | 327.5 | 12316 | 32.8  | 0.0101 |
| 10 | 314.1843 | 31458 | 214.2 | 8055  | 21.4  | 0.0100 |

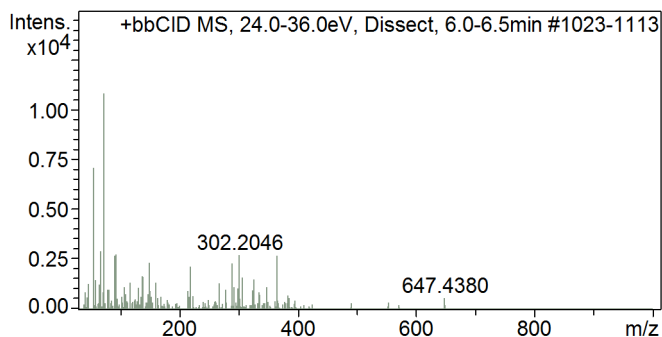

| #  | m/z      | Res.  | S/N   | I     | I %   | FWHM   |
|----|----------|-------|-------|-------|-------|--------|
| 1  | 55.0521  | 17091 | 654.2 | 7082  | 65.4  | 0.0032 |
| 2  | 67.0519  | 17806 | 271.2 | 2936  | 27.1  | 0.0038 |
| 3  | 72.0782  | 18253 | 999.7 | 10823 | 100.0 | 0.0039 |
| 4  | 91.0514  | 19531 | 250.5 | 2712  | 25.1  | 0.0047 |
| 5  | 93.0670  | 19094 | 255.1 | 2762  | 25.5  | 0.0049 |
| 6  | 149.0547 | 25791 | 217.0 | 2349  | 21.7  | 0.0058 |
| 7  | 219.1672 | 30571 | 200.0 | 2165  | 20.0  | 0.0072 |
| 8  | 290.2019 | 29198 | 213.1 | 2307  | 21.3  | 0.0099 |
| 9  | 302.2046 | 32053 | 252.7 | 2736  | 25.3  | 0.0094 |
| 10 | 365.0934 | 32480 | 249.0 | 2696  | 24.9  | 0.0112 |

## Cmpd 49, Dissect, 6.4 min

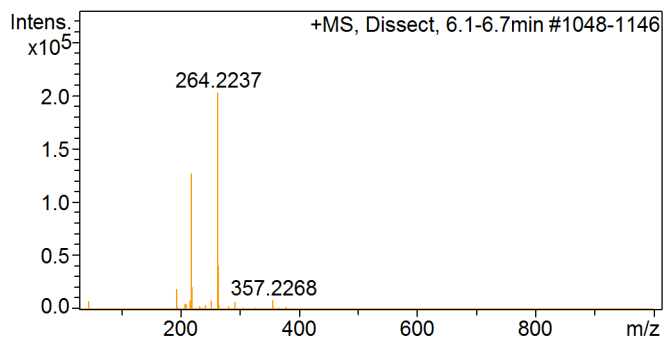

| #  | m/z      | Res.  | S/N   | I      | I %   | FWHM   |
|----|----------|-------|-------|--------|-------|--------|
| 1  | 46.0632  | 15867 | 36.7  | 7422   | 3.7   | 0.0029 |
| 2  | 195.0952 | 28994 | 96.5  | 19539  | 9.7   | 0.0067 |
| 3  | 195.1313 | 27561 | 40.2  | 8141   | 4.0   | 0.0071 |
| 4  | 217.0764 | 29220 | 40.8  | 8264   | 4.1   | 0.0074 |
| 5  | 219.1673 | 30605 | 626.0 | 126713 | 62.6  | 0.0072 |
| 6  | 220.1706 | 29323 | 103.7 | 20987  | 10.4  | 0.0075 |
| 7  | 253.1717 | 29313 | 38.6  | 7815   | 3.9   | 0.0086 |
| 8  | 264.2237 | 31244 | 999.6 | 202358 | 100.0 | 0.0085 |
| 9  | 265.2271 | 31941 | 206.2 | 41742  | 20.6  | 0.0083 |
| 10 | 357.2268 | 31117 | 43.5  | 8804   | 4.4   | 0.0115 |

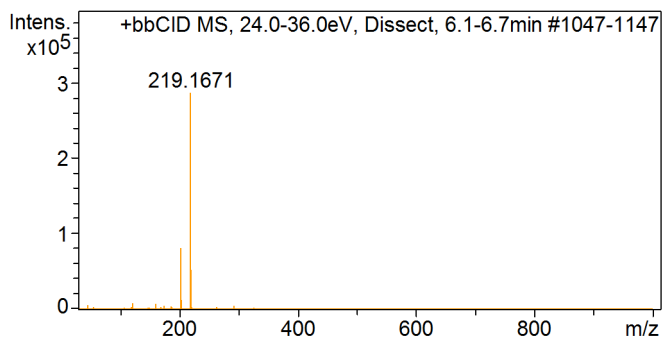

| #  | m/z      | Res.  | S/N   | I      | I %   | FWHM   |
|----|----------|-------|-------|--------|-------|--------|
| 1  | 46.0632  | 15960 | 19.2  | 5504   | 1.9   | 0.0029 |
| 2  | 121.0971 | 23745 | 26.5  | 7611   | 2.7   | 0.0051 |
| 3  | 161.0906 | 26663 | 16.5  | 4726   | 1.6   | 0.0060 |
| 4  | 161.1270 | 26833 | 25.6  | 7343   | 2.6   | 0.0060 |
| 5  | 175.1422 | 27333 | 14.9  | 4264   | 1.5   | 0.0064 |
| 6  | 203.1363 | 30253 | 284.1 | 81555  | 28.4  | 0.0067 |
| 7  | 204.1396 | 27598 | 41.9  | 12018  | 4.2   | 0.0074 |
| 8  | 219.1671 | 30640 | 999.2 | 286810 | 100.0 | 0.0072 |
| 9  | 220.1705 | 30700 | 184.1 | 52848  | 18.4  | 0.0072 |
| 10 | 293.1627 | 31245 | 15.8  | 4536   | 1.6   | 0.0094 |

# Compound Spectrum List Report

## Cmpd 50, Dissect, 6.4 min

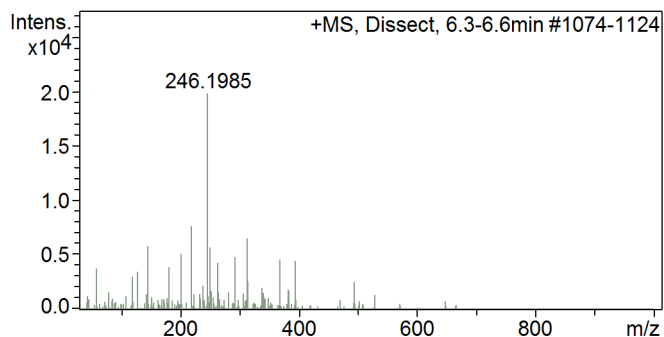

| #  | m/z      | Res.  | S/N   | I     | I %   | FWHM   |
|----|----------|-------|-------|-------|-------|--------|
| 1  | 145.0599 | 25174 | 294.5 | 5843  | 29.5  | 0.0058 |
| 2  | 202.0797 | 28806 | 257.6 | 5111  | 25.8  | 0.0070 |
| 3  | 219.1673 | 30563 | 386.2 | 7662  | 38.6  | 0.0072 |
| 4  | 246.1985 | 30650 | 999.9 | 19838 | 100.0 | 0.0080 |
| 5  | 251.1565 | 29253 | 288.9 | 5733  | 28.9  | 0.0086 |
| 6  | 293.1633 | 31358 | 243.7 | 4835  | 24.4  | 0.0093 |
| 7  | 313.1808 | 27203 | 248.2 | 4924  | 24.8  | 0.0115 |
| 8  | 313.2398 | 28104 | 328.3 | 6513  | 32.8  | 0.0111 |
| 9  | 368.2284 | 31498 | 231.9 | 4601  | 23.2  | 0.0117 |
| 10 | 394.1944 | 29230 | 226.9 | 4503  | 22.7  | 0.0135 |

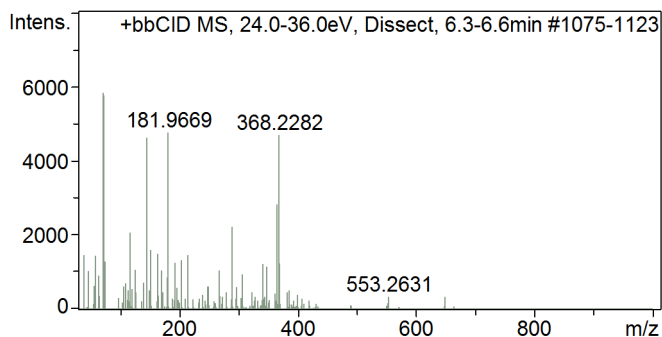

| #  | m/z      | Res.  | S/N   | I    | I %   | FWHM   |
|----|----------|-------|-------|------|-------|--------|
| 1  | 71.9494  | 18220 | 400.5 | 2339 | 40.1  | 0.0039 |
| 2  | 72.0418  | 18784 | 999.3 | 5836 | 100.0 | 0.0038 |
| 3  | 72.0782  | 18328 | 988.1 | 5771 | 98.9  | 0.0039 |
| 4  | 117.0660 | 22873 | 354.6 | 2071 | 35.5  | 0.0051 |
| 5  | 145.0599 | 25727 | 791.5 | 4623 | 79.2  | 0.0056 |
| 6  | 145.0962 | 25690 | 550.4 | 3214 | 55.1  | 0.0056 |
| 7  | 181.9669 | 27962 | 815.4 | 4762 | 81.6  | 0.0065 |
| 8  | 290.2019 | 29529 | 381.0 | 2225 | 38.1  | 0.0098 |
| 9  | 365.0934 | 31395 | 484.3 | 2829 | 48.5  | 0.0116 |
| 10 | 368.2282 | 31137 | 804.4 | 4698 | 80.5  | 0.0118 |

## Cmpd 51, Dissect, 6.6 min

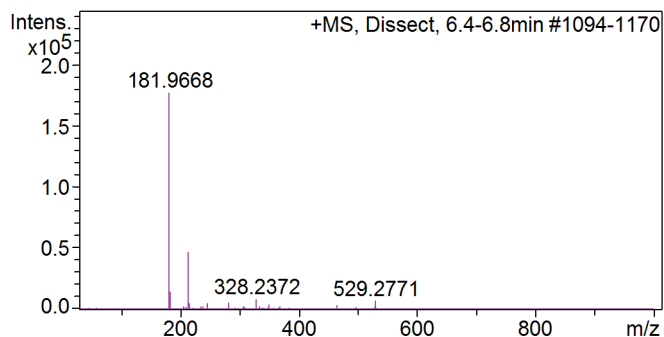

| #  | m/z      | Res.  | S/N   | I      | I %   | FWHM   |
|----|----------|-------|-------|--------|-------|--------|
| 1  | 181.9668 | 29115 | 995.6 | 176982 | 100.0 | 0.0062 |
| 2  | 182.9696 | 24838 | 78.4  | 13934  | 7.9   | 0.0074 |
| 3  | 183.9627 | 27463 | 84.0  | 14927  | 8.4   | 0.0067 |
| 4  | 213.9920 | 30732 | 148.7 | 26435  | 14.9  | 0.0070 |
| 5  | 214.0826 | 31827 | 266.5 | 47371  | 26.8  | 0.0067 |
| 6  | 215.9877 | 28594 | 27.1  | 4810   | 2.7   | 0.0076 |
| 7  | 246.1983 | 29628 | 28.2  | 5016   | 2.8   | 0.0083 |
| 8  | 282.1966 | 30271 | 30.8  | 5469   | 3.1   | 0.0093 |
| 9  | 328.2372 | 31756 | 47.7  | 8487   | 4.8   | 0.0103 |
| 10 | 529.2771 | 31576 | 40.4  | 7182   | 4.1   | 0.0168 |

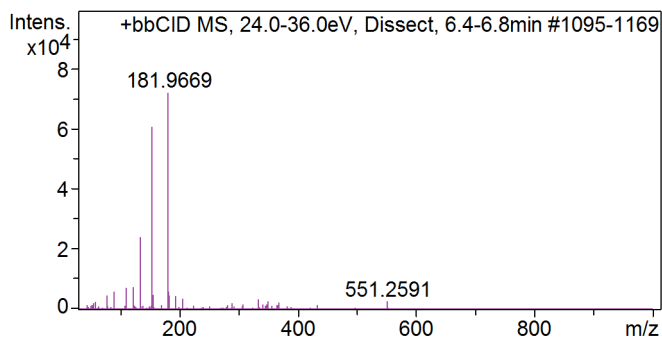

| #  | m/z      | Res.  | S/N   | I     | I %   | FWHM   |
|----|----------|-------|-------|-------|-------|--------|
| 1  | 78.0312  | 18522 | 65.0  | 4695  | 6.5   | 0.0042 |
| 2  | 90.0311  | 19262 | 83.5  | 6037  | 8.4   | 0.0047 |
| 3  | 110.0022 | 22334 | 102.6 | 7415  | 10.3  | 0.0049 |
| 4  | 122.0019 | 23321 | 104.4 | 7544  | 10.5  | 0.0052 |
| 5  | 134.0014 | 25033 | 332.5 | 24022 | 33.4  | 0.0054 |
| 6  | 153.9728 | 26577 | 838.7 | 60597 | 84.2  | 0.0058 |
| 7  | 155.9686 | 26163 | 69.5  | 5024  | 7.0   | 0.0060 |
| 8  | 181.9669 | 28542 | 996.3 | 71985 | 100.0 | 0.0064 |
| 9  | 182.9700 | 23186 | 84.7  | 6118  | 8.5   | 0.0079 |
| 10 | 183.9628 | 27110 | 67.5  | 4878  | 6.8   | 0.0068 |

# Compound Spectrum List Report

## Cmpd 52, Dissect, 6.8 min

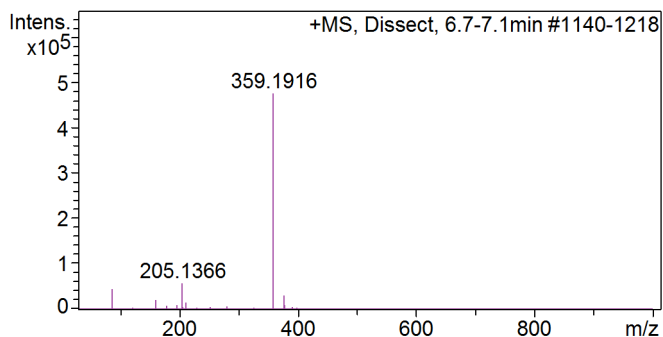

| #  | m/z      | Res.  | S/N   | I      | I %   | FWHM   |
|----|----------|-------|-------|--------|-------|--------|
| 1  | 87.0411  | 19754 | 93.4  | 45617  | 9.6   | 0.0044 |
| 2  | 161.1271 | 26330 | 46.0  | 22455  | 4.7   | 0.0061 |
| 3  | 179.1370 | 26576 | 15.7  | 7662   | 1.6   | 0.0067 |
| 4  | 197.1469 | 27968 | 18.7  | 9159   | 1.9   | 0.0070 |
| 5  | 205.1366 | 29142 | 119.2 | 58250  | 12.2  | 0.0070 |
| 6  | 212.1575 | 28340 | 29.8  | 14534  | 3.1   | 0.0075 |
| 7  | 281.1056 | 29463 | 13.0  | 6327   | 1.3   | 0.0095 |
| 8  | 359.1916 | 40492 | 975.4 | 476466 | 100.0 | 0.0089 |
| 9  | 377.2029 | 30075 | 65.5  | 31995  | 6.7   | 0.0125 |
| 10 | 378.2059 | 36351 | 18.4  | 9008   | 1.9   | 0.0104 |

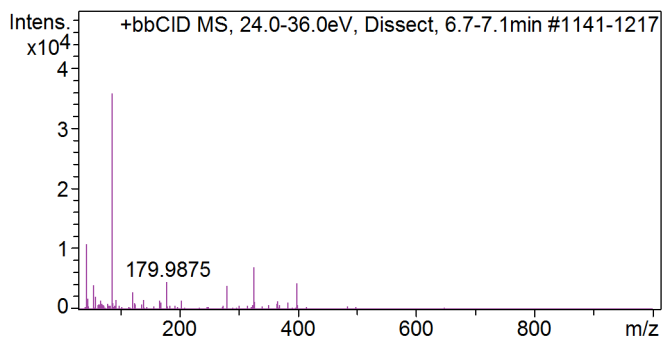

| #  | m/z      | Res.  | S/N   | I     | I %   | FWHM   |
|----|----------|-------|-------|-------|-------|--------|
| 1  | 43.0160  | 15593 | 302.2 | 10848 | 30.3  | 0.0028 |
| 2  | 43.0525  | 15324 | 54.3  | 1951  | 5.4   | 0.0028 |
| 3  | 55.0520  | 17076 | 113.7 | 4082  | 11.4  | 0.0032 |
| 4  | 58.0629  | 17367 | 60.5  | 2173  | 6.1   | 0.0033 |
| 5  | 87.0411  | 19562 | 998.2 | 35838 | 100.0 | 0.0044 |
| 6  | 121.0973 | 22476 | 81.3  | 2920  | 8.1   | 0.0054 |
| 7  | 179.9875 | 28371 | 127.0 | 4560  | 12.7  | 0.0063 |
| 8  | 281.1056 | 30091 | 111.9 | 4017  | 11.2  | 0.0093 |
| 9  | 326.2191 | 30619 | 194.9 | 6998  | 19.5  | 0.0107 |
| 10 | 399.1649 | 31298 | 123.5 | 4432  | 12.4  | 0.0128 |

## Cmpd 53, Dissect, 6.9 min

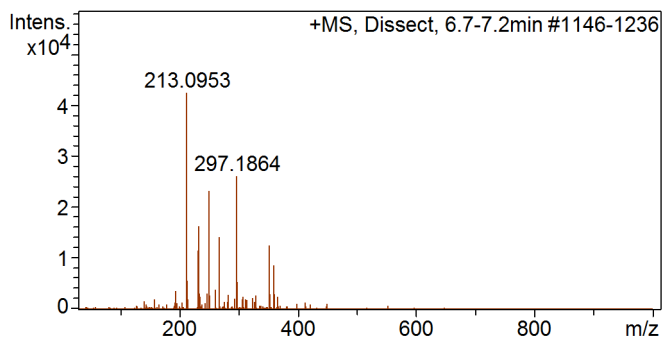

| #  | m/z      | Res.  | S/N   | I     | I %   | FWHM   |
|----|----------|-------|-------|-------|-------|--------|
| 1  | 213.0953 | 29846 | 999.8 | 42418 | 100.0 | 0.0071 |
| 2  | 214.1731 | 28738 | 133.4 | 5658  | 13.3  | 0.0075 |
| 3  | 232.1619 | 29531 | 272.4 | 11556 | 27.2  | 0.0079 |
| 4  | 233.1459 | 29961 | 385.5 | 16356 | 38.6  | 0.0078 |
| 5  | 251.1560 | 31525 | 546.9 | 23201 | 54.7  | 0.0080 |
| 6  | 268.1805 | 30744 | 334.1 | 14175 | 33.4  | 0.0087 |
| 7  | 297.1864 | 31923 | 616.0 | 26134 | 61.6  | 0.0093 |
| 8  | 298.1898 | 29116 | 127.9 | 5424  | 12.8  | 0.0102 |
| 9  | 352.2341 | 32402 | 297.3 | 12614 | 29.7  | 0.0109 |
| 10 | 360.1948 | 29507 | 205.2 | 8706  | 20.5  | 0.0122 |

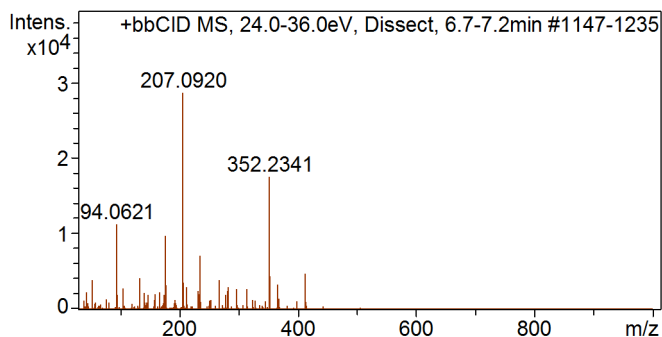

| #  | m/z      | Res.  | S/N   | I     | I %   | FWHM   |
|----|----------|-------|-------|-------|-------|--------|
| 1  | 53.0364  | 16686 | 137.7 | 3950  | 13.8  | 0.0032 |
| 2  | 94.0621  | 19774 | 392.2 | 11252 | 39.2  | 0.0048 |
| 3  | 133.0967 | 24134 | 145.9 | 4187  | 14.6  | 0.0055 |
| 4  | 177.0825 | 28503 | 339.2 | 9732  | 33.9  | 0.0062 |
| 5  | 207.0920 | 30132 | 999.2 | 28668 | 100.0 | 0.0069 |
| 6  | 236.1545 | 30489 | 248.5 | 7129  | 24.9  | 0.0077 |
| 7  | 268.1797 | 28774 | 138.0 | 3960  | 13.8  | 0.0093 |
| 8  | 352.2341 | 32178 | 611.2 | 17536 | 61.2  | 0.0109 |
| 9  | 353.2375 | 31510 | 155.6 | 4464  | 15.6  | 0.0112 |
| 10 | 413.1991 | 27492 | 167.1 | 4793  | 16.7  | 0.0150 |

# Compound Spectrum List Report

## Cmpd 54, Dissect, 7.2 min

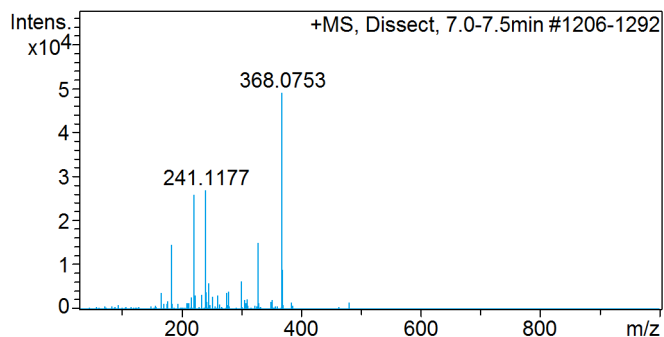

| #  | m/z      | Res.  | S/N   | I     | I %   | FWHM   |
|----|----------|-------|-------|-------|-------|--------|
| 1  | 184.1634 | 28029 | 299.7 | 14693 | 30.0  | 0.0066 |
| 2  | 222.1779 | 30436 | 530.1 | 25995 | 53.0  | 0.0073 |
| 3  | 241.1177 | 30146 | 548.7 | 26904 | 54.9  | 0.0080 |
| 4  | 246.2346 | 30355 | 122.0 | 5984  | 12.2  | 0.0081 |
| 5  | 279.1864 | 28920 | 84.8  | 4157  | 8.5   | 0.0097 |
| 6  | 301.1678 | 29107 | 132.5 | 6495  | 13.3  | 0.0103 |
| 7  | 329.1575 | 32186 | 308.7 | 15136 | 30.9  | 0.0102 |
| 8  | 368.0753 | 34144 | 999.6 | 49016 | 100.0 | 0.0108 |
| 9  | 368.2285 | 31054 | 189.5 | 9292  | 19.0  | 0.0119 |
| 10 | 369.0784 | 29970 | 184.6 | 9051  | 18.5  | 0.0123 |

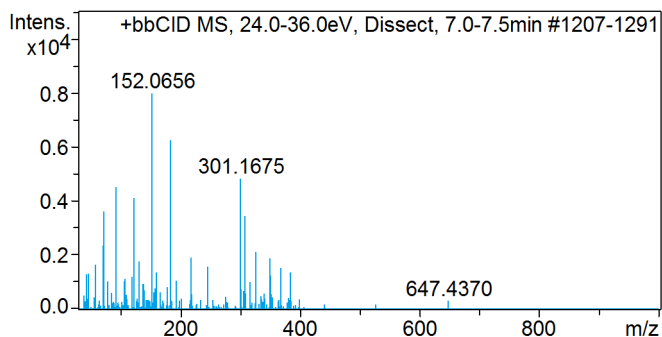

| #  | m/z      | Res.  | S/N   | I    | I %   | FWHM   |
|----|----------|-------|-------|------|-------|--------|
| 1  | 71.0466  | 18351 | 298.2 | 2380 | 29.8  | 0.0039 |
| 2  | 72.0782  | 18239 | 454.5 | 3627 | 45.5  | 0.0040 |
| 3  | 92.0466  | 19518 | 565.2 | 4511 | 56.5  | 0.0047 |
| 4  | 122.0560 | 22794 | 516.3 | 4120 | 51.6  | 0.0054 |
| 5  | 152.0656 | 26124 | 999.8 | 7979 | 100.0 | 0.0058 |
| 6  | 184.0366 | 27850 | 781.3 | 6235 | 78.1  | 0.0066 |
| 7  | 184.1636 | 27769 | 278.1 | 2219 | 27.8  | 0.0066 |
| 8  | 301.1675 | 29447 | 603.6 | 4817 | 60.4  | 0.0102 |
| 9  | 308.2098 | 30490 | 434.0 | 3463 | 43.4  | 0.0101 |
| 10 | 326.2194 | 29985 | 266.8 | 2129 | 26.7  | 0.0109 |

## Cmpd 55, Dissect, 7.3 min

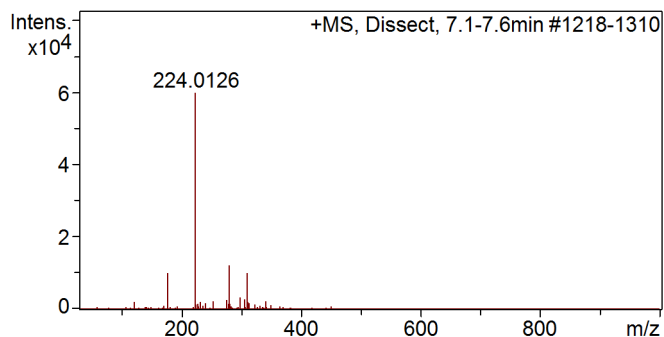

| #  | m/z      | Res.  | S/N   | I     | I %   | FWHM   |
|----|----------|-------|-------|-------|-------|--------|
| 1  | 178.1167 | 27219 | 170.7 | 10223 | 17.1  | 0.0065 |
| 2  | 224.0126 | 30585 | 998.5 | 59810 | 100.0 | 0.0073 |
| 3  | 232.1832 | 29269 | 34.5  | 2065  | 3.5   | 0.0079 |
| 4  | 254.1647 | 28345 | 37.9  | 2270  | 3.8   | 0.0090 |
| 5  | 276.0059 | 29253 | 46.1  | 2760  | 4.6   | 0.0094 |
| 6  | 281.1057 | 31439 | 204.9 | 12275 | 20.5  | 0.0089 |
| 7  | 298.9113 | 31119 | 56.9  | 3407  | 5.7   | 0.0096 |
| 8  | 306.1944 | 31065 | 47.8  | 2863  | 4.8   | 0.0099 |
| 9  | 310.2276 | 32773 | 168.7 | 10102 | 16.9  | 0.0095 |
| 10 | 341.2471 | 29023 | 36.9  | 2212  | 3.7   | 0.0118 |

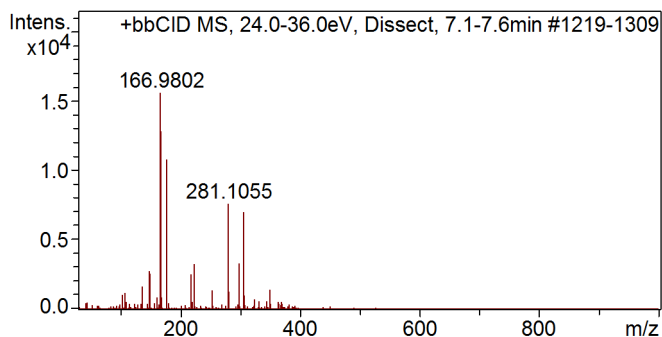

| #  | m/z      | Res.  | S/N   | I     | I %   | FWHM   |
|----|----------|-------|-------|-------|-------|--------|
| 1  | 148.0167 | 26182 | 177.3 | 2765  | 17.7  | 0.0057 |
| 2  | 149.0185 | 25706 | 166.5 | 2597  | 16.7  | 0.0058 |
| 3  | 166.9802 | 26978 | 999.1 | 15586 | 100.0 | 0.0062 |
| 4  | 167.9879 | 26276 | 820.2 | 12796 | 82.1  | 0.0064 |
| 5  | 178.1167 | 27095 | 690.5 | 10772 | 69.1  | 0.0066 |
| 6  | 219.1670 | 30404 | 164.3 | 2564  | 16.4  | 0.0072 |
| 7  | 224.0125 | 30371 | 211.9 | 3305  | 21.2  | 0.0074 |
| 8  | 281.1055 | 31530 | 487.4 | 7603  | 48.8  | 0.0089 |
| 9  | 298.9114 | 31265 | 214.5 | 3346  | 21.5  | 0.0096 |
| 10 | 306.1940 | 30909 | 449.7 | 7016  | 45.0  | 0.0099 |

# Compound Spectrum List Report

## Cmpd 56, Dissect, 7.4 min

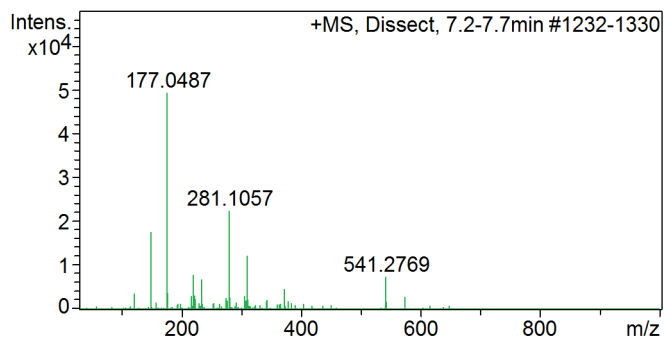

| #  | m/z      | Res.  | S/N   | I     | I %   | FWHM   |
|----|----------|-------|-------|-------|-------|--------|
| 1  | 121.0608 | 23212 | 76.0  | 3745  | 7.6   | 0.0052 |
| 2  | 149.0184 | 25588 | 358.5 | 17671 | 35.9  | 0.0058 |
| 3  | 177.0487 | 27778 | 999.7 | 49281 | 100.0 | 0.0064 |
| 4  | 178.1166 | 27050 | 78.5  | 3872  | 7.9   | 0.0066 |
| 5  | 221.0671 | 29076 | 160.0 | 7885  | 16.0  | 0.0076 |
| 6  | 235.1616 | 29985 | 138.6 | 6834  | 13.9  | 0.0078 |
| 7  | 281.1057 | 32356 | 455.0 | 22431 | 45.5  | 0.0087 |
| 8  | 310.2274 | 33368 | 250.4 | 12344 | 25.0  | 0.0093 |
| 9  | 373.2071 | 30243 | 96.8  | 4773  | 9.7   | 0.0123 |
| 10 | 541.2769 | 31650 | 150.5 | 7420  | 15.1  | 0.0171 |

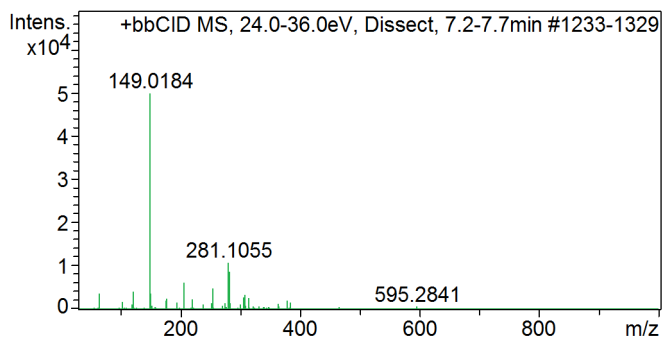

| #  | m/z      | Res.  | S/N   | I     | I %   | FWHM   |
|----|----------|-------|-------|-------|-------|--------|
| 1  | 65.0363  | 16971 | 76.2  | 3811  | 7.6   | 0.0038 |
| 2  | 121.0244 | 23783 | 83.4  | 4170  | 8.3   | 0.0051 |
| 3  | 149.0184 | 26487 | 999.5 | 49970 | 100.0 | 0.0056 |
| 4  | 150.0217 | 25113 | 74.4  | 3717  | 7.4   | 0.0060 |
| 5  | 207.0921 | 28734 | 124.2 | 6209  | 12.4  | 0.0072 |
| 6  | 255.0554 | 30149 | 99.0  | 4951  | 9.9   | 0.0085 |
| 7  | 281.1055 | 31113 | 218.0 | 10901 | 21.8  | 0.0090 |
| 8  | 283.1420 | 32355 | 176.3 | 8815  | 17.6  | 0.0088 |
| 9  | 306.1939 | 30746 | 57.9  | 2894  | 5.8   | 0.0100 |
| 10 | 308.2094 | 30922 | 69.9  | 3494  | 7.0   | 0.0100 |

## Cmpd 57, Dissect, 7.6 min

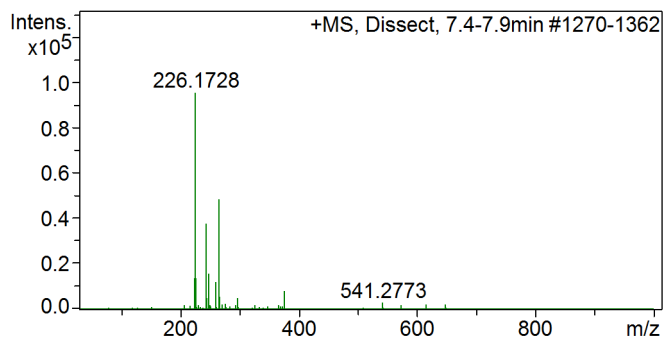

| #  | m/z      | Res.  | S/N   | I     | I %   | FWHM   |
|----|----------|-------|-------|-------|-------|--------|
| 1  | 225.1313 | 29790 | 145.1 | 14017 | 14.7  | 0.0076 |
| 2  | 226.0282 | 29994 | 74.0  | 7149  | 7.5   | 0.0075 |
| 3  | 226.1348 | 28249 | 111.0 | 10722 | 11.2  | 0.0080 |
| 4  | 226.1728 | 31280 | 987.4 | 95407 | 100.0 | 0.0072 |
| 5  | 227.1760 | 29099 | 144.7 | 13977 | 14.6  | 0.0078 |
| 6  | 244.1828 | 31086 | 391.6 | 37841 | 39.7  | 0.0079 |
| 7  | 249.1402 | 31070 | 163.6 | 15810 | 16.6  | 0.0080 |
| 8  | 260.2134 | 31581 | 125.9 | 12162 | 12.7  | 0.0082 |
| 9  | 266.1640 | 32184 | 500.7 | 48380 | 50.7  | 0.0083 |
| 10 | 376.1837 | 32698 | 84.4  | 8157  | 8.5   | 0.0115 |

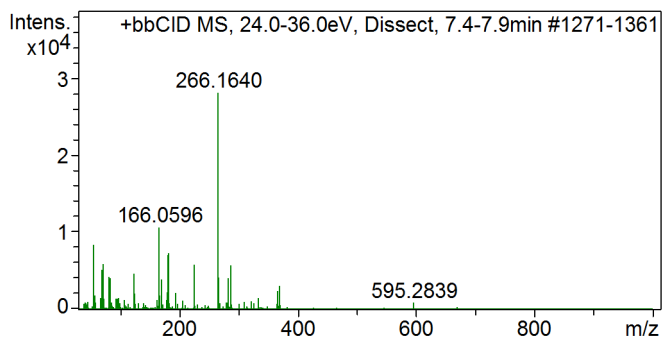

| #  | m/z      | Res.  | S/N   | I     | I %   | FWHM   |
|----|----------|-------|-------|-------|-------|--------|
| 1  | 55.0520  | 17102 | 297.9 | 8377  | 29.8  | 0.0032 |
| 2  | 69.0674  | 17968 | 185.3 | 5212  | 18.6  | 0.0038 |
| 3  | 72.0418  | 18213 | 210.8 | 5927  | 21.1  | 0.0040 |
| 4  | 166.0596 | 27068 | 379.9 | 10684 | 38.0  | 0.0061 |
| 5  | 167.0666 | 24412 | 185.7 | 5221  | 18.6  | 0.0068 |
| 6  | 182.0777 | 28153 | 252.7 | 7105  | 25.3  | 0.0065 |
| 7  | 183.0853 | 25361 | 262.0 | 7369  | 26.2  | 0.0072 |
| 8  | 226.1726 | 31548 | 208.8 | 5873  | 20.9  | 0.0072 |
| 9  | 266.1640 | 31867 | 999.1 | 28096 | 100.0 | 0.0084 |
| 10 | 288.1452 | 30421 | 205.0 | 5766  | 20.5  | 0.0095 |

# Compound Spectrum List Report

## Cmpd 58, Dissect, 7.7 min

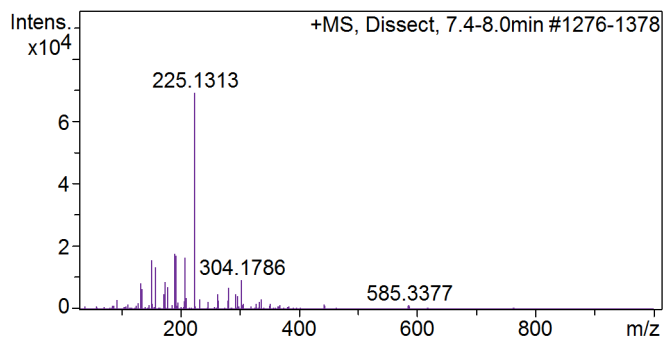

| #  | m/z      | Res.  | S/N   | I     | I %   | FWHM   |
|----|----------|-------|-------|-------|-------|--------|
| 1  | 133.0968 | 23562 | 123.0 | 8509  | 12.3  | 0.0056 |
| 2  | 151.1067 | 26014 | 228.6 | 15812 | 22.9  | 0.0058 |
| 3  | 158.1486 | 26236 | 195.7 | 13539 | 19.6  | 0.0060 |
| 4  | 175.1423 | 26242 | 126.6 | 8761  | 12.7  | 0.0067 |
| 5  | 179.0581 | 24650 | 105.4 | 7292  | 10.6  | 0.0073 |
| 6  | 191.1367 | 28679 | 256.2 | 17723 | 25.7  | 0.0067 |
| 7  | 193.1524 | 28684 | 248.5 | 17190 | 24.9  | 0.0067 |
| 8  | 209.1467 | 27901 | 238.7 | 16510 | 23.9  | 0.0075 |
| 9  | 225.1313 | 29948 | 998.6 | 69077 | 100.0 | 0.0075 |
| 10 | 304.1786 | 28672 | 136.0 | 9406  | 13.6  | 0.0106 |

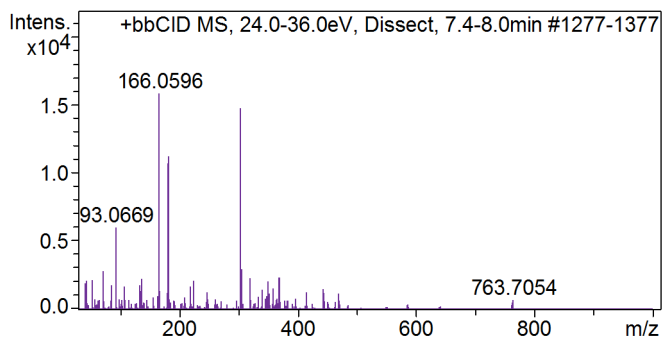

| #  | m/z      | Res.  | S/N   | I     | I %   | FWHM   |
|----|----------|-------|-------|-------|-------|--------|
| 1  | 71.0466  | 18420 | 177.7 | 2813  | 17.8  | 0.0039 |
| 2  | 93.0669  | 19181 | 380.7 | 6026  | 38.1  | 0.0049 |
| 3  | 166.0596 | 27100 | 999.9 | 15826 | 100.0 | 0.0061 |
| 4  | 167.0666 | 24377 | 791.5 | 12528 | 79.2  | 0.0069 |
| 5  | 182.0777 | 27899 | 674.1 | 10670 | 67.4  | 0.0065 |
| 6  | 183.0853 | 25484 | 706.6 | 11185 | 70.7  | 0.0072 |
| 7  | 304.1784 | 30247 | 929.3 | 14709 | 92.9  | 0.0101 |
| 8  | 305.1816 | 30241 | 166.0 | 2628  | 16.6  | 0.0101 |
| 9  | 306.1939 | 30053 | 188.4 | 2982  | 18.8  | 0.0102 |
| 10 | 370.2438 | 31253 | 149.6 | 2369  | 15.0  | 0.0118 |

## Cmpd 59, Dissect, 7.8 min

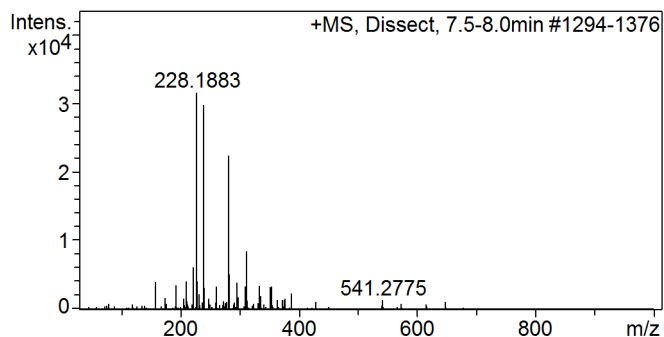

| #  | m/z      | Res.  | S/N   | I     | I %   | FWHM   |
|----|----------|-------|-------|-------|-------|--------|
| 1  | 158.1486 | 26296 | 126.6 | 4006  | 12.7  | 0.0060 |
| 2  | 211.1621 | 29045 | 129.9 | 4110  | 13.0  | 0.0073 |
| 3  | 223.1618 | 28889 | 195.9 | 6200  | 19.7  | 0.0077 |
| 4  | 228.1883 | 30366 | 996.5 | 31533 | 100.0 | 0.0075 |
| 5  | 229.1916 | 28501 | 130.6 | 4133  | 13.1  | 0.0080 |
| 6  | 240.1880 | 31306 | 937.5 | 29666 | 94.1  | 0.0077 |
| 7  | 282.1953 | 32329 | 707.4 | 22384 | 71.0  | 0.0087 |
| 8  | 283.1984 | 29617 | 164.1 | 5194  | 16.5  | 0.0096 |
| 9  | 296.2487 | 29650 | 125.4 | 3968  | 12.6  | 0.0100 |
| 10 | 312.2429 | 32363 | 269.3 | 8521  | 27.0  | 0.0096 |

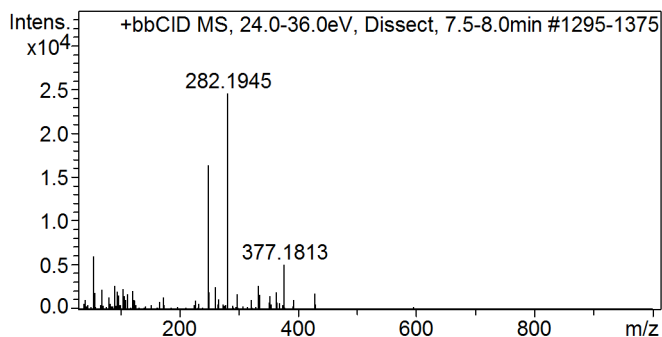

| #  | m/z      | Res.  | S/N   | I     | I %   | FWHM   |
|----|----------|-------|-------|-------|-------|--------|
| 1  | 55.0520  | 17110 | 247.4 | 6085  | 24.8  | 0.0032 |
| 2  | 69.0673  | 17921 | 93.3  | 2294  | 9.3   | 0.0039 |
| 3  | 91.0513  | 19715 | 110.2 | 2710  | 11.0  | 0.0046 |
| 4  | 105.0664 | 21404 | 97.0  | 2385  | 9.7   | 0.0049 |
| 5  | 121.0973 | 22797 | 87.7  | 2157  | 8.8   | 0.0053 |
| 6  | 250.1696 | 31590 | 664.6 | 16344 | 66.5  | 0.0079 |
| 7  | 262.1693 | 29660 | 105.6 | 2596  | 10.6  | 0.0088 |
| 8  | 282.1945 | 32552 | 999.0 | 24568 | 100.0 | 0.0087 |
| 9  | 334.2240 | 31621 | 109.5 | 2693  | 11.0  | 0.0106 |
| 10 | 377.1813 | 29865 | 207.1 | 5094  | 20.7  | 0.0126 |

# Compound Spectrum List Report

## Cmpd 60, Dissect, 7.9 min

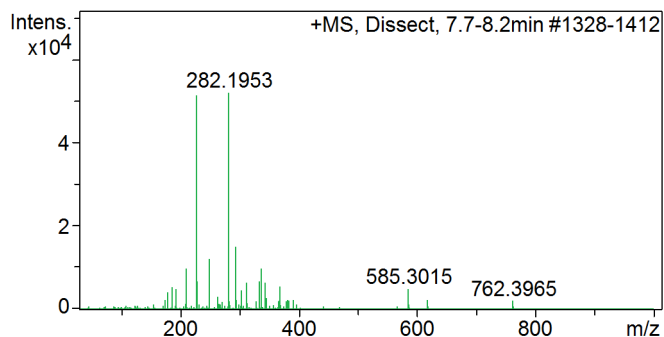

| #  | m/z      | Res.  | S/N   | I     | I %   | FWHM   |
|----|----------|-------|-------|-------|-------|--------|
| 1  | 211.1622 | 29203 | 188.6 | 9806  | 18.9  | 0.0072 |
| 2  | 228.1883 | 30692 | 987.7 | 51369 | 98.9  | 0.0074 |
| 3  | 229.1916 | 29096 | 131.4 | 6832  | 13.2  | 0.0079 |
| 4  | 250.1696 | 30494 | 233.1 | 12123 | 23.3  | 0.0082 |
| 5  | 282.1953 | 32435 | 998.8 | 51945 | 100.0 | 0.0087 |
| 6  | 294.2331 | 32101 | 289.2 | 15041 | 29.0  | 0.0092 |
| 7  | 312.2429 | 32207 | 126.4 | 6574  | 12.7  | 0.0097 |
| 8  | 334.2240 | 31541 | 131.6 | 6844  | 13.2  | 0.0106 |
| 9  | 337.0929 | 31330 | 188.9 | 9822  | 18.9  | 0.0108 |
| 10 | 344.2314 | 29811 | 124.7 | 6488  | 12.5  | 0.0115 |

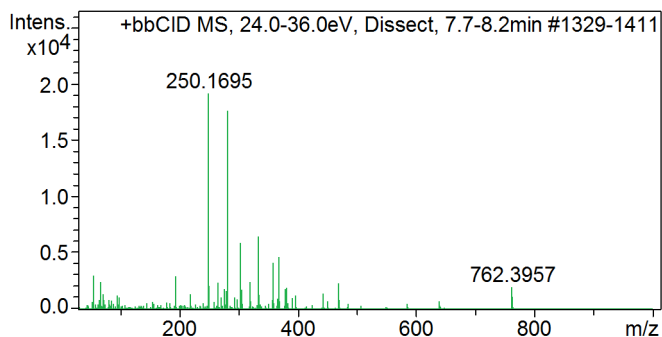

| #  | m/z      | Res.  | S/N   | I     | I %   | FWHM   |
|----|----------|-------|-------|-------|-------|--------|
| 1  | 55.0520  | 17209 | 159.0 | 3048  | 15.9  | 0.0032 |
| 2  | 67.0519  | 17520 | 129.4 | 2480  | 12.9  | 0.0038 |
| 3  | 195.0927 | 26899 | 154.6 | 2964  | 15.5  | 0.0073 |
| 4  | 250.1695 | 31574 | 999.7 | 19159 | 100.0 | 0.0079 |
| 5  | 282.1945 | 32519 | 918.0 | 17595 | 91.8  | 0.0087 |
| 6  | 304.1783 | 30162 | 308.2 | 5906  | 30.8  | 0.0101 |
| 7  | 320.0673 | 29491 | 127.7 | 2447  | 12.8  | 0.0109 |
| 8  | 334.2241 | 31329 | 339.0 | 6498  | 33.9  | 0.0107 |
| 9  | 359.0737 | 31456 | 216.7 | 4153  | 21.7  | 0.0114 |
| 10 | 368.2283 | 31583 | 242.5 | 4648  | 24.3  | 0.0117 |

## Cmpd 61, Dissect, 8.1 min

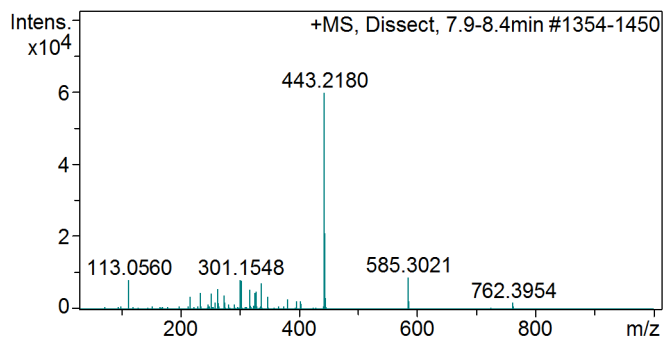

| #  | m/z      | Res.  | S/N   | I     | I %   | FWHM   |
|----|----------|-------|-------|-------|-------|--------|
| 1  | 113.0560 | 22645 | 137.0 | 8204  | 13.7  | 0.0050 |
| 2  | 264.1857 | 29243 | 96.2  | 5761  | 9.6   | 0.0090 |
| 3  | 301.1548 | 32543 | 138.0 | 8261  | 13.8  | 0.0093 |
| 4  | 304.1785 | 29488 | 133.4 | 7988  | 13.4  | 0.0103 |
| 5  | 318.1806 | 31104 | 92.6  | 5543  | 9.3   | 0.0102 |
| 6  | 328.2376 | 32013 | 85.0  | 5088  | 8.5   | 0.0103 |
| 7  | 337.0927 | 31098 | 121.6 | 7281  | 12.2  | 0.0108 |
| 8  | 443.2180 | 32811 | 998.8 | 59798 | 100.0 | 0.0135 |
| 9  | 444.2212 | 31467 | 353.0 | 21132 | 35.3  | 0.0141 |
| 10 | 585.3021 | 30377 | 148.9 | 8913  | 14.9  | 0.0193 |

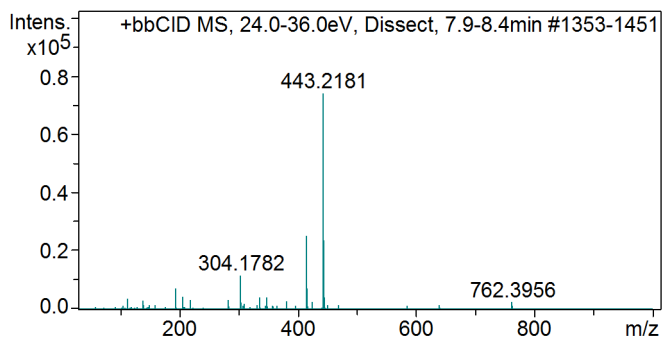

| #  | m/z      | Res.  | S/N   | I     | I %   | FWHM   |
|----|----------|-------|-------|-------|-------|--------|
| 1  | 195.0925 | 27535 | 100.1 | 7422  | 10.0  | 0.0071 |
| 2  | 207.0922 | 27622 | 60.1  | 4454  | 6.0   | 0.0075 |
| 3  | 304.1782 | 31784 | 158.4 | 11739 | 15.8  | 0.0096 |
| 4  | 336.2397 | 31831 | 56.2  | 4163  | 5.6   | 0.0106 |
| 5  | 348.2031 | 30395 | 59.0  | 4370  | 5.9   | 0.0115 |
| 6  | 415.1877 | 31418 | 339.8 | 25180 | 34.0  | 0.0132 |
| 7  | 416.1910 | 30876 | 99.2  | 7355  | 9.9   | 0.0135 |
| 8  | 443.2181 | 33804 | 999.6 | 74079 | 100.0 | 0.0131 |
| 9  | 444.2214 | 32676 | 319.2 | 23654 | 31.9  | 0.0136 |
| 10 | 445.2239 | 30704 | 56.7  | 4202  | 5.7   | 0.0145 |

# Compound Spectrum List Report

## Cmpd 62, Dissect, 8.1 min

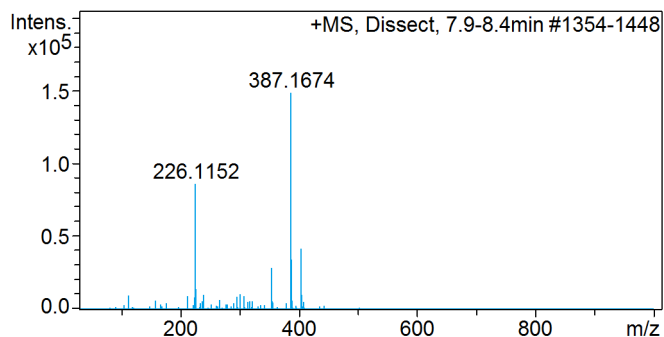

| #  | m/z      | Res.  | S/N   | I      | I %   | FWHM   |
|----|----------|-------|-------|--------|-------|--------|
| 1  | 113.0560 | 22614 | 64.9  | 9666   | 6.5   | 0.0050 |
| 2  | 226.1152 | 30720 | 578.5 | 86164  | 58.0  | 0.0074 |
| 3  | 227.1188 | 29148 | 94.8  | 14123  | 9.5   | 0.0078 |
| 4  | 240.1879 | 30438 | 68.5  | 10197  | 6.9   | 0.0079 |
| 5  | 301.1547 | 32554 | 73.1  | 10890  | 7.3   | 0.0093 |
| 6  | 354.2497 | 32369 | 191.7 | 28555  | 19.2  | 0.0109 |
| 7  | 387.1674 | 35312 | 997.3 | 148533 | 100.0 | 0.0110 |
| 8  | 388.1708 | 32886 | 231.2 | 34431  | 23.2  | 0.0118 |
| 9  | 404.1933 | 33577 | 279.9 | 41681  | 28.1  | 0.0120 |
| 10 | 405.1965 | 30573 | 69.3  | 10318  | 6.9   | 0.0133 |

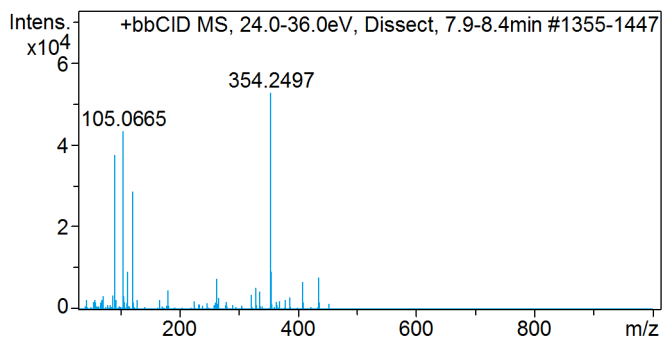

| #  | m/z      | Res.  | S/N   | I     | I %   | FWHM   |
|----|----------|-------|-------|-------|-------|--------|
| 1  | 91.0514  | 19944 | 711.5 | 37501 | 71.2  | 0.0046 |
| 2  | 105.0665 | 21470 | 821.1 | 43282 | 82.2  | 0.0049 |
| 3  | 113.0561 | 22331 | 174.1 | 9177  | 17.4  | 0.0051 |
| 4  | 121.0609 | 23318 | 542.7 | 28605 | 54.3  | 0.0052 |
| 5  | 121.0974 | 22688 | 124.8 | 6577  | 12.5  | 0.0053 |
| 6  | 264.1848 | 30292 | 143.3 | 7553  | 14.3  | 0.0087 |
| 7  | 354.2497 | 33974 | 999.6 | 52686 | 100.0 | 0.0104 |
| 8  | 355.2529 | 30334 | 173.9 | 9167  | 17.4  | 0.0117 |
| 9  | 409.1487 | 30919 | 127.2 | 6703  | 12.7  | 0.0132 |
| 10 | 435.2204 | 30149 | 148.7 | 7839  | 14.9  | 0.0144 |

## Cmpd 63, Dissect, 8.3 min

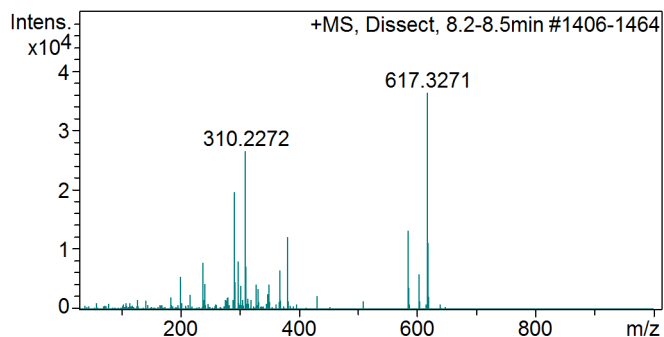

| #  | m/z      | Res.  | S/N   | I     | I %   | FWHM   |
|----|----------|-------|-------|-------|-------|--------|
| 1  | 239.1179 | 31217 | 215.2 | 7818  | 21.5  | 0.0077 |
| 2  | 292.2176 | 31710 | 541.2 | 19665 | 54.1  | 0.0092 |
| 3  | 298.2281 | 31096 | 222.3 | 8076  | 22.2  | 0.0096 |
| 4  | 310.2272 | 33178 | 729.0 | 26487 | 72.9  | 0.0094 |
| 5  | 311.2306 | 30112 | 198.9 | 7228  | 19.9  | 0.0103 |
| 6  | 368.2289 | 32031 | 180.1 | 6543  | 18.0  | 0.0115 |
| 7  | 382.0475 | 32140 | 333.2 | 12108 | 33.3  | 0.0119 |
| 8  | 585.3019 | 29999 | 365.0 | 13261 | 36.5  | 0.0195 |
| 9  | 617.3271 | 32099 | 999.9 | 36330 | 100.0 | 0.0192 |
| 10 | 618.3299 | 30419 | 306.6 | 11141 | 30.7  | 0.0203 |

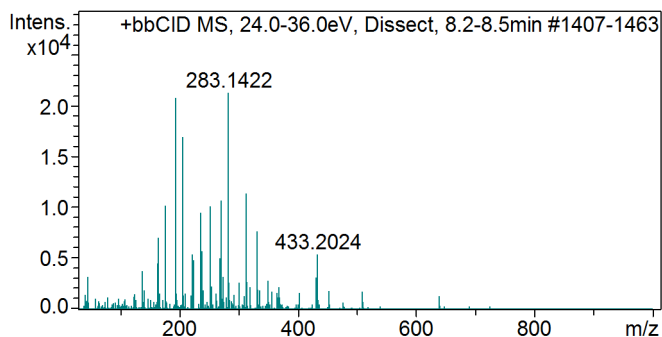

| #  | m/z      | Res.  | S/N   | I     | I %   | FWHM   |
|----|----------|-------|-------|-------|-------|--------|
| 1  | 165.0834 | 25168 | 330.7 | 7028  | 33.1  | 0.0066 |
| 2  | 177.0826 | 26435 | 479.1 | 10182 | 47.9  | 0.0067 |
| 3  | 195.0925 | 28713 | 976.6 | 20756 | 97.7  | 0.0068 |
| 4  | 207.0921 | 28454 | 793.5 | 16864 | 79.4  | 0.0073 |
| 5  | 237.1019 | 29447 | 445.8 | 9475  | 44.6  | 0.0081 |
| 6  | 253.1325 | 30147 | 477.6 | 10150 | 47.8  | 0.0084 |
| 7  | 271.1425 | 29969 | 502.2 | 10674 | 50.2  | 0.0090 |
| 8  | 283.1422 | 31546 | 999.7 | 21247 | 100.0 | 0.0090 |
| 9  | 313.1517 | 31095 | 534.6 | 11362 | 53.5  | 0.0101 |
| 10 | 332.2086 | 31032 | 360.2 | 7654  | 36.0  | 0.0107 |



# Compound Spectrum List Report

## Cmpd 64, Dissect, 8.4 min

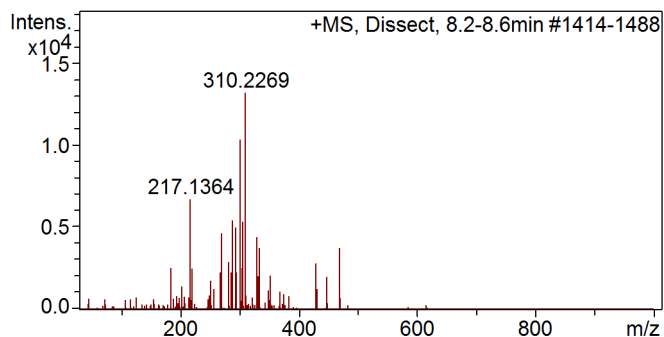

| #  | m/z      | Res.  | S/N   | I     | I %   | FWHM   |
|----|----------|-------|-------|-------|-------|--------|
| 1  | 217.1364 | 28378 | 508.2 | 6701  | 50.9  | 0.0077 |
| 2  | 270.2341 | 29838 | 351.8 | 4639  | 35.2  | 0.0091 |
| 3  | 288.2437 | 29249 | 410.4 | 5412  | 41.1  | 0.0099 |
| 4  | 294.2330 | 31583 | 378.0 | 4984  | 37.8  | 0.0093 |
| 5  | 302.0204 | 30909 | 782.4 | 10316 | 78.3  | 0.0098 |
| 6  | 306.0517 | 31459 | 404.5 | 5334  | 40.5  | 0.0097 |
| 7  | 310.2269 | 32952 | 999.1 | 13174 | 100.0 | 0.0094 |
| 8  | 330.2531 | 32152 | 334.2 | 4407  | 33.4  | 0.0103 |
| 9  | 334.2242 | 31631 | 283.2 | 3734  | 28.3  | 0.0106 |
| 10 | 469.1672 | 31353 | 284.6 | 3753  | 28.5  | 0.0150 |

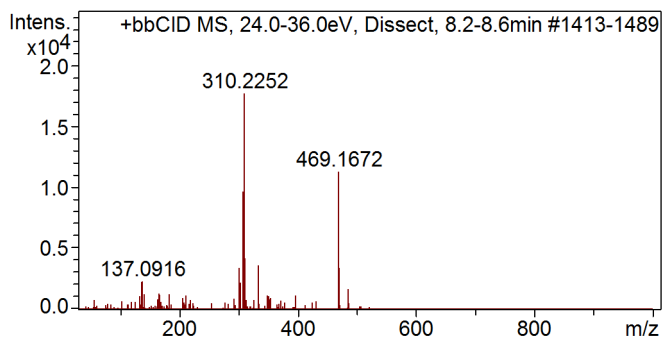

| #  | m/z      | Res.  | S/N   | I     | I %   | FWHM   |
|----|----------|-------|-------|-------|-------|--------|
| 1  | 136.0472 | 23846 | 128.4 | 2274  | 12.8  | 0.0057 |
| 2  | 137.0916 | 24828 | 130.9 | 2318  | 13.1  | 0.0055 |
| 3  | 302.0206 | 31341 | 195.0 | 3455  | 19.5  | 0.0096 |
| 4  | 304.1783 | 30331 | 126.6 | 2243  | 12.7  | 0.0100 |
| 5  | 308.2096 | 31239 | 546.2 | 9675  | 54.6  | 0.0099 |
| 6  | 310.2252 | 31081 | 999.5 | 17704 | 100.0 | 0.0100 |
| 7  | 311.2281 | 31124 | 239.1 | 4234  | 23.9  | 0.0100 |
| 8  | 334.2240 | 31813 | 204.5 | 3623  | 20.5  | 0.0105 |
| 9  | 469.1672 | 31307 | 635.7 | 11259 | 63.6  | 0.0150 |
| 10 | 470.1705 | 29505 | 193.1 | 3420  | 19.3  | 0.0159 |

## Cmpd 65, Dissect, 8.4 min

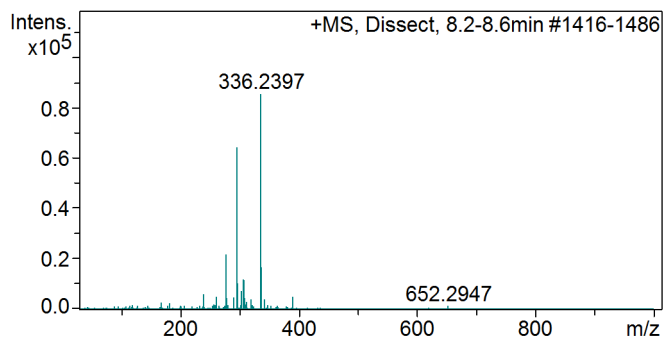

| #  | m/z      | Res.  | S/N   | I     | I %   | FWHM   |
|----|----------|-------|-------|-------|-------|--------|
| 1  | 240.1878 | 30012 | 73.6  | 6298  | 7.4   | 0.0080 |
| 2  | 278.2388 | 31262 | 256.4 | 21931 | 25.7  | 0.0089 |
| 3  | 296.2487 | 32454 | 749.8 | 64145 | 75.0  | 0.0091 |
| 4  | 297.2518 | 31209 | 121.7 | 10412 | 12.2  | 0.0095 |
| 5  | 304.0359 | 30464 | 88.3  | 7552  | 8.8   | 0.0100 |
| 6  | 307.2166 | 30192 | 141.5 | 12104 | 14.2  | 0.0102 |
| 7  | 308.2110 | 30471 | 137.7 | 11778 | 13.8  | 0.0101 |
| 8  | 336.1044 | 30304 | 73.7  | 6305  | 7.4   | 0.0111 |
| 9  | 336.2397 | 33721 | 999.2 | 85479 | 100.0 | 0.0100 |
| 10 | 337.2429 | 29997 | 196.4 | 16804 | 19.7  | 0.0112 |

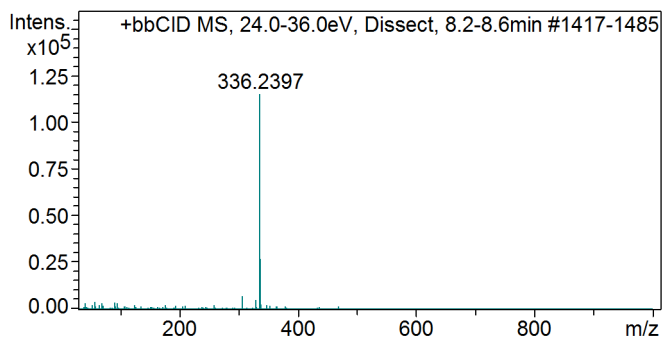

| #  | m/z      | Res.  | S/N   | I      | I %   | FWHM   |
|----|----------|-------|-------|--------|-------|--------|
| 1  | 41.0368  | 15159 | 29.4  | 3388   | 2.9   | 0.0027 |
| 2  | 57.0677  | 17061 | 34.5  | 3972   | 3.5   | 0.0033 |
| 3  | 69.0673  | 17978 | 27.8  | 3210   | 2.8   | 0.0038 |
| 4  | 91.0514  | 19413 | 30.9  | 3566   | 3.1   | 0.0047 |
| 5  | 95.0825  | 19794 | 27.2  | 3133   | 2.7   | 0.0048 |
| 6  | 307.2169 | 30337 | 63.8  | 7353   | 6.4   | 0.0101 |
| 7  | 330.1931 | 30025 | 43.2  | 4981   | 4.3   | 0.0110 |
| 8  | 336.1043 | 29587 | 38.6  | 4452   | 3.9   | 0.0114 |
| 9  | 336.2397 | 33903 | 998.7 | 115130 | 100.0 | 0.0099 |
| 10 | 337.2428 | 30688 | 234.0 | 26981  | 23.4  | 0.0110 |

# Compound Spectrum List Report

## Cmpd 66, Dissect, 8.6 min

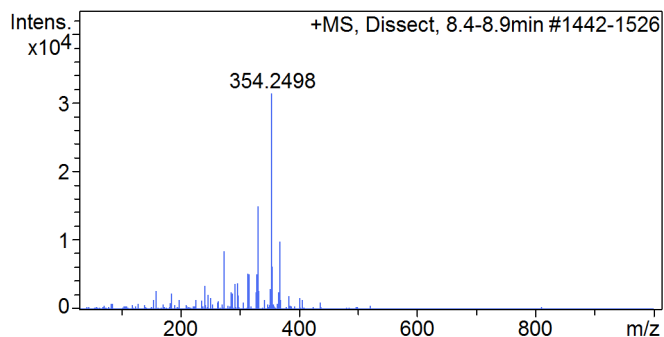

| #  | m/z      | Res.  | S/N   | I     | I %   | FWHM   |
|----|----------|-------|-------|-------|-------|--------|
| 1  | 274.2288 | 30252 | 270.3 | 8501  | 27.1  | 0.0091 |
| 2  | 297.1025 | 31142 | 123.5 | 3883  | 12.4  | 0.0095 |
| 3  | 314.2585 | 30199 | 167.0 | 5253  | 16.7  | 0.0104 |
| 4  | 317.1620 | 30120 | 164.1 | 5161  | 16.4  | 0.0105 |
| 5  | 330.2532 | 32672 | 163.8 | 5151  | 16.4  | 0.0101 |
| 6  | 332.2087 | 30158 | 138.8 | 4363  | 13.9  | 0.0110 |
| 7  | 332.2686 | 32363 | 475.3 | 14947 | 47.6  | 0.0103 |
| 8  | 354.2498 | 32801 | 998.7 | 31407 | 100.0 | 0.0108 |
| 9  | 355.2527 | 28930 | 199.3 | 6267  | 20.0  | 0.0123 |
| 10 | 368.2287 | 32436 | 313.3 | 9853  | 31.4  | 0.0114 |

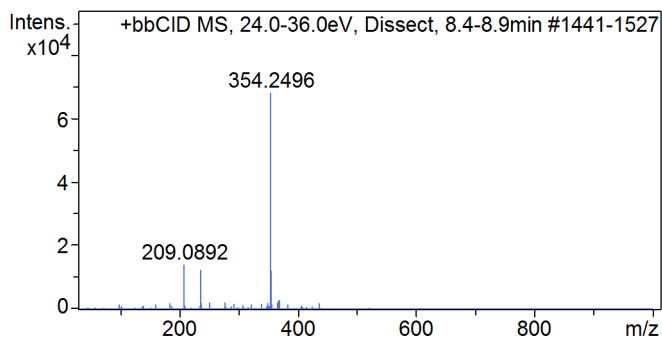

| #  | m/z      | Res.  | S/N   | I     | I %   | FWHM   |
|----|----------|-------|-------|-------|-------|--------|
| 1  | 185.1474 | 28541 | 29.3  | 1994  | 2.9   | 0.0065 |
| 2  | 209.0892 | 28856 | 207.5 | 14138 | 20.8  | 0.0072 |
| 3  | 237.0832 | 30123 | 184.8 | 12592 | 18.5  | 0.0079 |
| 4  | 252.1125 | 29011 | 30.5  | 2080  | 3.1   | 0.0087 |
| 5  | 278.1637 | 30067 | 31.1  | 2122  | 3.1   | 0.0093 |
| 6  | 354.2496 | 34505 | 999.6 | 68108 | 100.0 | 0.0103 |
| 7  | 355.2530 | 29841 | 182.4 | 12430 | 18.3  | 0.0119 |
| 8  | 366.2124 | 29991 | 31.4  | 2141  | 3.1   | 0.0122 |
| 9  | 368.2283 | 32337 | 45.9  | 3128  | 4.6   | 0.0114 |
| 10 | 370.2233 | 26157 | 38.5  | 2626  | 3.9   | 0.0142 |

## Cmpd 67, Dissect, 8.8 min

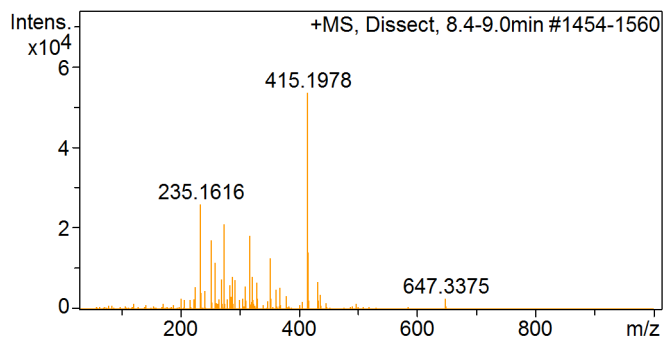

| #  | m/z      | Res.  | S/N   | I     | I %   | FWHM   |
|----|----------|-------|-------|-------|-------|--------|
| 1  | 235.1616 | 29740 | 484.8 | 25952 | 48.5  | 0.0079 |
| 2  | 253.1716 | 29805 | 320.1 | 17137 | 32.0  | 0.0085 |
| 3  | 260.0114 | 29486 | 217.7 | 11655 | 21.8  | 0.0088 |
| 4  | 275.1528 | 31811 | 394.0 | 21093 | 39.4  | 0.0086 |
| 5  | 288.2440 | 30614 | 152.3 | 8152  | 15.2  | 0.0094 |
| 6  | 318.2898 | 31581 | 341.1 | 18259 | 34.1  | 0.0101 |
| 7  | 322.1901 | 29972 | 152.0 | 8137  | 15.2  | 0.0107 |
| 8  | 352.2343 | 32860 | 237.2 | 12701 | 23.7  | 0.0107 |
| 9  | 415.1978 | 32378 | 999.6 | 53514 | 100.0 | 0.0128 |
| 10 | 416.2009 | 30961 | 264.2 | 14145 | 26.4  | 0.0134 |

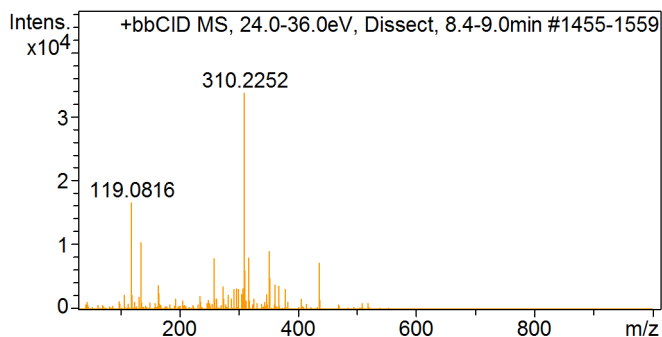

| #  | m/z      | Res.  | S/N    | I     | I %   | FWHM   |
|----|----------|-------|--------|-------|-------|--------|
| 1  | 119.0566 | 22601 | 208.9  | 7045  | 20.9  | 0.0053 |
| 2  | 119.0816 | 23080 | 494.8  | 16686 | 49.5  | 0.0052 |
| 3  | 135.0760 | 24375 | 312.0  | 10521 | 31.2  | 0.0055 |
| 4  | 259.1605 | 29629 | 237.7  | 8015  | 23.8  | 0.0087 |
| 5  | 310.2252 | 31724 | 1000.0 | 33718 | 100.0 | 0.0098 |
| 6  | 311.2281 | 30328 | 182.3  | 6147  | 18.2  | 0.0103 |
| 7  | 318.2899 | 31704 | 239.7  | 8081  | 24.0  | 0.0100 |
| 8  | 352.2341 | 33380 | 268.9  | 9068  | 26.9  | 0.0106 |
| 9  | 353.2374 | 30759 | 145.4  | 4902  | 14.5  | 0.0115 |
| 10 | 437.1791 | 30885 | 217.6  | 7336  | 21.8  | 0.0142 |

# Compound Spectrum List Report

## Cmpd 68, Dissect, 8.9 min

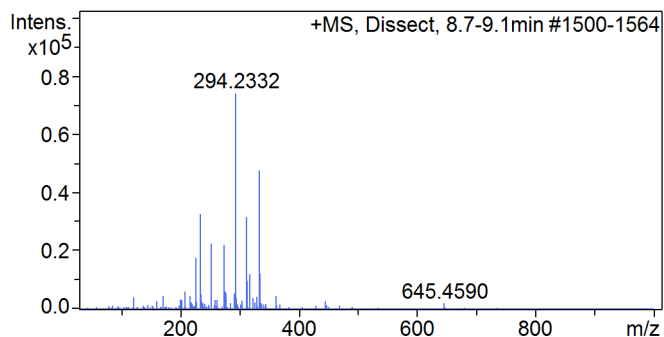

| #  | m/z      | Res.  | S/N   | I     | I %   | FWHM   |
|----|----------|-------|-------|-------|-------|--------|
| 1  | 227.1567 | 29019 | 242.0 | 17933 | 24.2  | 0.0078 |
| 2  | 235.1615 | 29518 | 440.3 | 32625 | 44.0  | 0.0080 |
| 3  | 253.1716 | 29455 | 307.0 | 22753 | 30.7  | 0.0086 |
| 4  | 275.1529 | 31064 | 298.3 | 22108 | 29.8  | 0.0089 |
| 5  | 294.2332 | 31697 | 999.5 | 74064 | 100.0 | 0.0093 |
| 6  | 312.2432 | 33115 | 426.2 | 31579 | 42.6  | 0.0094 |
| 7  | 313.2464 | 30471 | 134.5 | 9965  | 13.5  | 0.0103 |
| 8  | 318.2899 | 31163 | 163.1 | 12088 | 16.3  | 0.0102 |
| 9  | 334.2244 | 33734 | 643.4 | 47676 | 64.4  | 0.0099 |
| 10 | 335.2274 | 30239 | 166.8 | 12362 | 16.7  | 0.0111 |

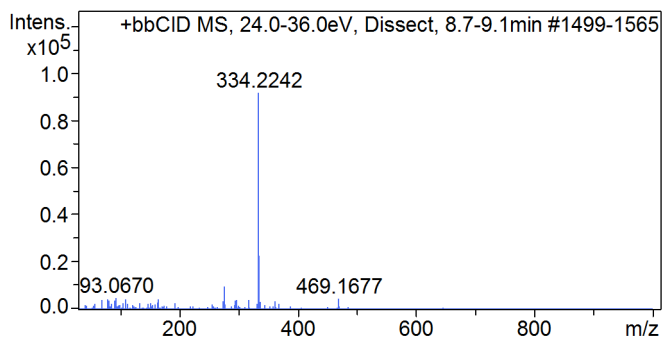

| #  | m/z      | Res.  | S/N   | I     | I %   | FWHM   |
|----|----------|-------|-------|-------|-------|--------|
| 1  | 69.0674  | 18171 | 44.8  | 4109  | 4.5   | 0.0038 |
| 2  | 79.0515  | 18981 | 50.1  | 4591  | 5.0   | 0.0042 |
| 3  | 93.0670  | 19170 | 54.0  | 4951  | 5.4   | 0.0049 |
| 4  | 109.0976 | 21826 | 49.8  | 4568  | 5.0   | 0.0050 |
| 5  | 165.1219 | 26223 | 47.3  | 4338  | 4.7   | 0.0063 |
| 6  | 277.2072 | 31679 | 106.7 | 9787  | 10.7  | 0.0088 |
| 7  | 318.2900 | 31482 | 44.6  | 4088  | 4.5   | 0.0101 |
| 8  | 334.2242 | 33587 | 999.8 | 91661 | 100.0 | 0.0100 |
| 9  | 335.2275 | 31379 | 248.5 | 22786 | 24.9  | 0.0107 |
| 10 | 469.1677 | 30382 | 51.9  | 4758  | 5.2   | 0.0154 |

## Cmpd 69, Dissect, 9.0 min

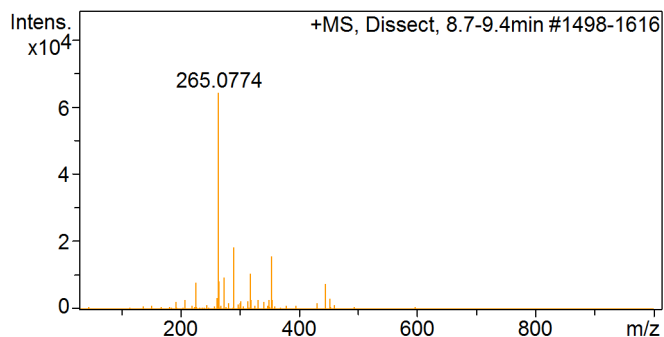

| #  | m/z      | Res.  | S/N   | I     | I %   | FWHM   |
|----|----------|-------|-------|-------|-------|--------|
| 1  | 227.1567 | 28813 | 125.0 | 8042  | 12.5  | 0.0079 |
| 2  | 263.1921 | 29863 | 54.7  | 3522  | 5.5   | 0.0088 |
| 3  | 265.0774 | 31927 | 997.7 | 64203 | 100.0 | 0.0083 |
| 4  | 266.0808 | 30721 | 130.9 | 8425  | 13.1  | 0.0087 |
| 5  | 274.2652 | 31060 | 149.6 | 9628  | 15.0  | 0.0088 |
| 6  | 291.1837 | 32971 | 287.5 | 18499 | 28.8  | 0.0088 |
| 7  | 319.1647 | 31560 | 115.5 | 7432  | 11.6  | 0.0101 |
| 8  | 319.2165 | 31203 | 166.0 | 10683 | 16.6  | 0.0102 |
| 9  | 354.2502 | 30732 | 245.5 | 15800 | 24.6  | 0.0115 |
| 10 | 445.1974 | 29690 | 117.9 | 7588  | 11.8  | 0.0150 |

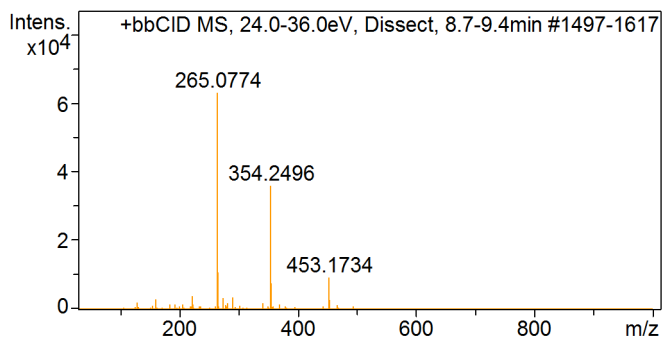

| #  | m/z      | Res.  | S/N    | I     | I %   | FWHM   |
|----|----------|-------|--------|-------|-------|--------|
| 1  | 161.1272 | 27169 | 48.2   | 3032  | 4.8   | 0.0059 |
| 2  | 223.0680 | 29937 | 63.8   | 4017  | 6.4   | 0.0075 |
| 3  | 265.0774 | 32412 | 1000.0 | 62944 | 100.0 | 0.0082 |
| 4  | 266.0809 | 30727 | 171.3  | 10781 | 17.1  | 0.0087 |
| 5  | 274.2653 | 32485 | 54.9   | 3454  | 5.5   | 0.0084 |
| 6  | 291.1838 | 32744 | 56.5   | 3559  | 5.7   | 0.0089 |
| 7  | 354.2496 | 32989 | 569.6  | 35850 | 57.0  | 0.0107 |
| 8  | 355.2528 | 30169 | 121.8  | 7664  | 12.2  | 0.0118 |
| 9  | 453.1734 | 31296 | 149.4  | 9403  | 14.9  | 0.0145 |
| 10 | 454.1766 | 31548 | 46.3   | 2911  | 4.6   | 0.0144 |

# Compound Spectrum List Report

## Cmpd 70, Dissect, 9.1 min

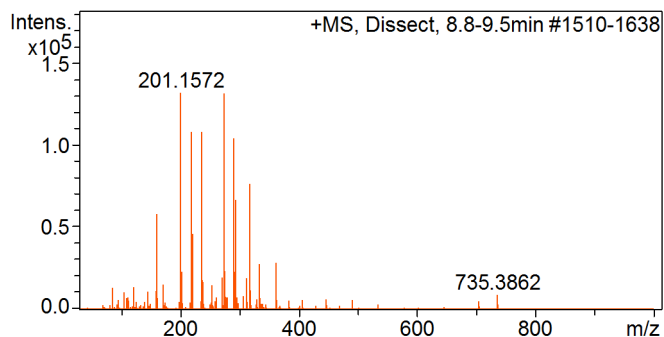

| #  | m/z      | Res.  | S/N   | I      | I %   | FWHM   |
|----|----------|-------|-------|--------|-------|--------|
| 1  | 161.1272 | 26984 | 439.6 | 57966  | 44.0  | 0.0060 |
| 2  | 201.1572 | 29598 | 999.4 | 131773 | 100.0 | 0.0068 |
| 3  | 219.1673 | 30534 | 817.4 | 107776 | 81.8  | 0.0072 |
| 4  | 221.1828 | 29577 | 348.1 | 45899  | 34.8  | 0.0075 |
| 5  | 237.1772 | 31303 | 816.6 | 107673 | 81.7  | 0.0076 |
| 6  | 274.2652 | 31226 | 996.6 | 131408 | 99.7  | 0.0088 |
| 7  | 291.1837 | 33028 | 786.8 | 103739 | 78.7  | 0.0088 |
| 8  | 294.2333 | 31522 | 505.1 | 66595  | 50.5  | 0.0093 |
| 9  | 318.2900 | 33090 | 578.4 | 76265  | 57.9  | 0.0096 |
| 10 | 362.3147 | 32708 | 215.1 | 28364  | 21.5  | 0.0111 |

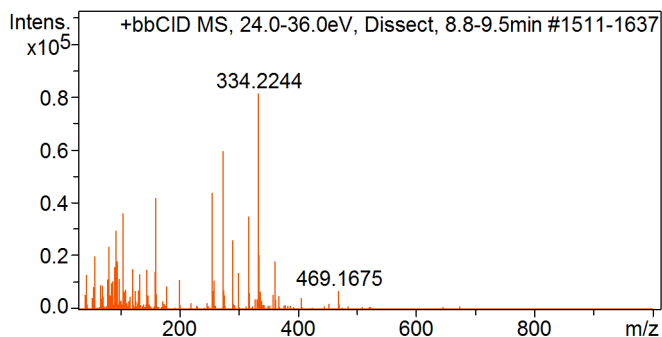

| #  | m/z      | Res.  | S/N   | I     | I %   | FWHM   |
|----|----------|-------|-------|-------|-------|--------|
| 1  | 81.0671  | 19360 | 290.6 | 23719 | 29.1  | 0.0042 |
| 2  | 93.0669  | 19579 | 363.6 | 29675 | 36.4  | 0.0048 |
| 3  | 105.0665 | 21565 | 444.0 | 36236 | 44.5  | 0.0049 |
| 4  | 161.1272 | 27165 | 512.6 | 41833 | 51.4  | 0.0059 |
| 5  | 256.2552 | 32067 | 538.7 | 43969 | 54.0  | 0.0080 |
| 6  | 274.2652 | 32569 | 729.5 | 59540 | 73.1  | 0.0084 |
| 7  | 291.1838 | 33001 | 319.2 | 26048 | 32.0  | 0.0088 |
| 8  | 318.2900 | 33950 | 429.3 | 35034 | 43.0  | 0.0094 |
| 9  | 334.2244 | 34504 | 998.1 | 81462 | 100.0 | 0.0097 |
| 10 | 335.2276 | 31293 | 251.4 | 20516 | 25.2  | 0.0107 |

## Cmpd 71, Dissect, 9.2 min

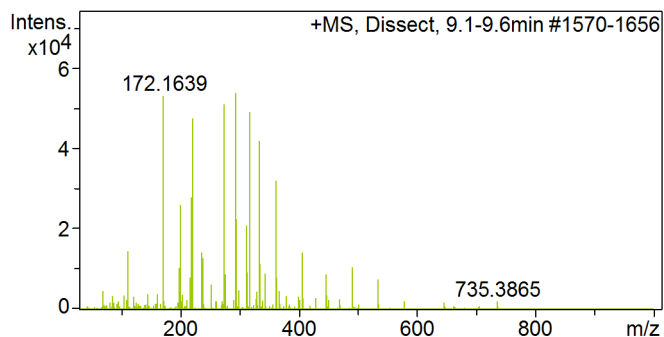

| #  | m/z      | Res.  | S/N   | I     | I %   | FWHM   |
|----|----------|-------|-------|-------|-------|--------|
| 1  | 172.1639 | 27137 | 984.6 | 53050 | 98.5  | 0.0063 |
| 2  | 201.1573 | 29096 | 482.4 | 25994 | 48.2  | 0.0069 |
| 3  | 219.1673 | 30205 | 516.4 | 27823 | 51.6  | 0.0073 |
| 4  | 221.1829 | 29477 | 879.0 | 47362 | 87.9  | 0.0075 |
| 5  | 274.2653 | 31575 | 944.8 | 50904 | 94.5  | 0.0087 |
| 6  | 294.2333 | 31584 | 999.9 | 53877 | 100.0 | 0.0093 |
| 7  | 295.2366 | 31117 | 418.2 | 22532 | 41.8  | 0.0095 |
| 8  | 318.2900 | 33303 | 909.4 | 48996 | 90.9  | 0.0096 |
| 9  | 334.2245 | 33857 | 775.2 | 41768 | 77.5  | 0.0099 |
| 10 | 362.3147 | 33072 | 593.5 | 31976 | 59.3  | 0.0110 |

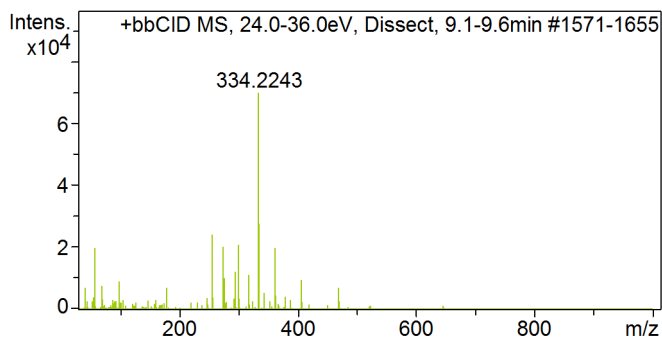

| #  | m/z      | Res.  | S/N   | I     | I %   | FWHM   |
|----|----------|-------|-------|-------|-------|--------|
| 1  | 57.0677  | 17297 | 285.6 | 19976 | 28.6  | 0.0033 |
| 2  | 256.2551 | 31944 | 346.4 | 24232 | 34.7  | 0.0080 |
| 3  | 274.2651 | 32386 | 289.9 | 20283 | 29.0  | 0.0085 |
| 4  | 277.2073 | 31826 | 144.7 | 10119 | 14.5  | 0.0087 |
| 5  | 295.2172 | 31708 | 175.7 | 12288 | 17.6  | 0.0093 |
| 6  | 300.2798 | 31357 | 298.1 | 20855 | 29.8  | 0.0096 |
| 7  | 318.2900 | 33933 | 159.1 | 11132 | 15.9  | 0.0094 |
| 8  | 334.2243 | 34476 | 998.8 | 69868 | 100.0 | 0.0097 |
| 9  | 335.2277 | 31873 | 396.0 | 27699 | 39.6  | 0.0105 |
| 10 | 362.3145 | 33440 | 285.6 | 19979 | 28.6  | 0.0108 |

# Compound Spectrum List Report

## Cmpd 72, Dissect, 9.3 min

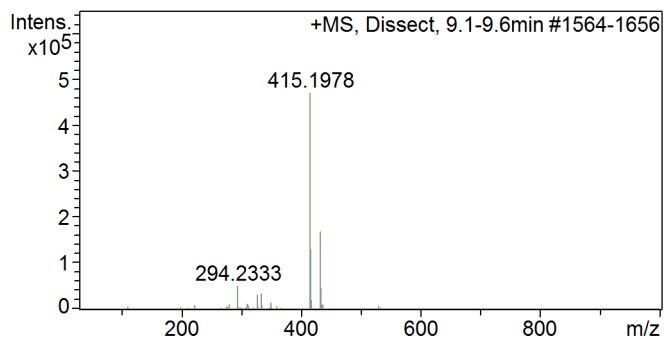

| #  | m/z      | Res.  | S/N   | I      | I %   | FWHM   |
|----|----------|-------|-------|--------|-------|--------|
| 1  | 294.2333 | 31755 | 110.7 | 52609  | 11.2  | 0.0093 |
| 2  | 310.2277 | 32968 | 25.2  | 11967  | 2.5   | 0.0094 |
| 3  | 328.2376 | 32861 | 68.5  | 32531  | 6.9   | 0.0100 |
| 4  | 334.2244 | 33340 | 73.6  | 34946  | 7.4   | 0.0100 |
| 5  | 350.2187 | 31808 | 29.5  | 14024  | 3.0   | 0.0110 |
| 6  | 415.1978 | 37094 | 990.3 | 470456 | 100.0 | 0.0112 |
| 7  | 416.2012 | 34508 | 275.5 | 130860 | 27.8  | 0.0121 |
| 8  | 417.2039 | 29451 | 45.1  | 21448  | 4.6   | 0.0142 |
| 9  | 432.2237 | 35800 | 358.7 | 170408 | 36.2  | 0.0121 |
| 10 | 433.2270 | 32422 | 98.0  | 46551  | 9.9   | 0.0134 |

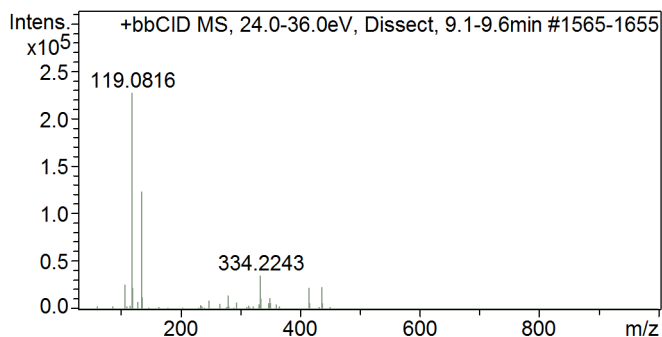

| #  | m/z      | Res.  | S/N   | I      | I %   | FWHM   |
|----|----------|-------|-------|--------|-------|--------|
| 1  | 107.0820 | 22052 | 117.0 | 26632  | 11.7  | 0.0049 |
| 2  | 119.0566 | 22314 | 66.5  | 15128  | 6.7   | 0.0053 |
| 3  | 119.0816 | 23927 | 997.2 | 226976 | 100.0 | 0.0050 |
| 4  | 120.0850 | 22791 | 101.1 | 23004  | 10.1  | 0.0053 |
| 5  | 135.0760 | 25163 | 542.9 | 123565 | 54.4  | 0.0054 |
| 6  | 136.0793 | 24059 | 57.0  | 12984  | 5.7   | 0.0057 |
| 7  | 281.1291 | 30626 | 66.3  | 15084  | 6.6   | 0.0092 |
| 8  | 334.2243 | 34278 | 157.2 | 35789  | 15.8  | 0.0098 |
| 9  | 415.1977 | 31391 | 102.4 | 23297  | 10.3  | 0.0132 |
| 10 | 437.1788 | 31570 | 105.5 | 24012  | 10.6  | 0.0138 |

## Cmpd 73, Dissect, 9.4 min

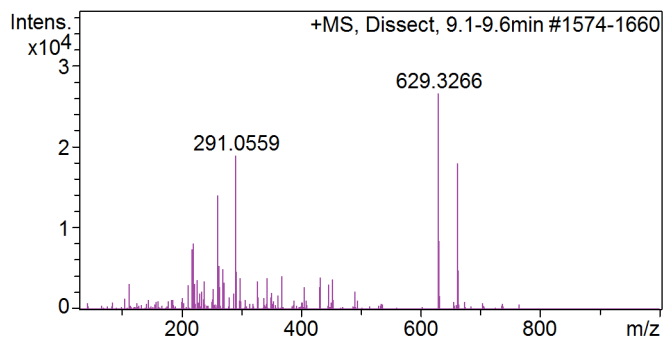

| #  | m/z      | Res.  | S/N    | I     | I %   | FWHM   |
|----|----------|-------|--------|-------|-------|--------|
| 1  | 219.1672 | 29107 | 280.1  | 7451  | 28.0  | 0.0075 |
| 2  | 221.1828 | 28309 | 304.1  | 8090  | 30.4  | 0.0078 |
| 3  | 261.1299 | 31616 | 526.7  | 14012 | 52.7  | 0.0083 |
| 4  | 263.1921 | 28325 | 202.9  | 5397  | 20.3  | 0.0093 |
| 5  | 270.1959 | 28784 | 186.5  | 4962  | 18.6  | 0.0094 |
| 6  | 291.0559 | 31150 | 709.1  | 18866 | 70.9  | 0.0093 |
| 7  | 629.3266 | 31475 | 1000.0 | 26606 | 100.0 | 0.0200 |
| 8  | 630.3289 | 30888 | 318.1  | 8463  | 31.8  | 0.0204 |
| 9  | 661.3515 | 30679 | 673.2  | 17912 | 67.3  | 0.0216 |
| 10 | 662.3544 | 28675 | 182.5  | 4854  | 18.2  | 0.0231 |

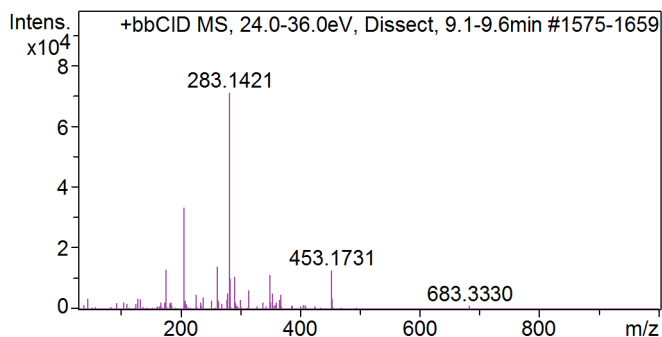

| #  | m/z      | Res.  | S/N   | I     | I %   | FWHM   |
|----|----------|-------|-------|-------|-------|--------|
| 1  | 177.0826 | 26637 | 184.2 | 13074 | 18.4  | 0.0066 |
| 2  | 207.0921 | 29127 | 469.2 | 33307 | 46.9  | 0.0071 |
| 3  | 263.0617 | 29788 | 198.6 | 14097 | 19.9  | 0.0088 |
| 4  | 283.1421 | 32852 | 999.6 | 70966 | 100.0 | 0.0086 |
| 5  | 284.1451 | 27996 | 142.3 | 10102 | 14.2  | 0.0101 |
| 6  | 291.0557 | 30771 | 152.2 | 10802 | 15.2  | 0.0095 |
| 7  | 315.1658 | 31384 | 89.8  | 6372  | 9.0   | 0.0100 |
| 8  | 350.2187 | 32512 | 159.2 | 11304 | 15.9  | 0.0108 |
| 9  | 354.2493 | 30113 | 75.4  | 5356  | 7.5   | 0.0118 |
| 10 | 453.1731 | 30916 | 182.0 | 12921 | 18.2  | 0.0147 |

# Compound Spectrum List Report

## Cmpd 74, Dissect, 9.4 min

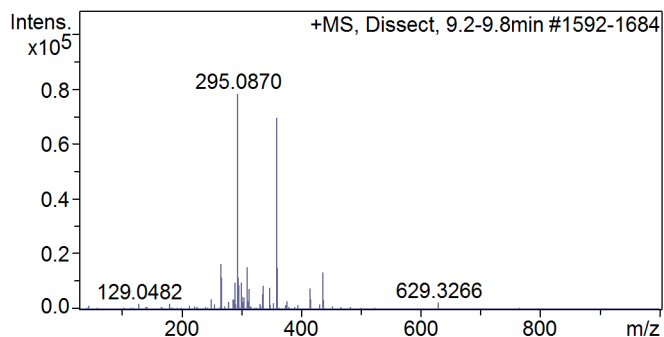

| #  | m/z      | Res.  | S/N   | I     | I %   | FWHM   |
|----|----------|-------|-------|-------|-------|--------|
| 1  | 267.0929 | 30340 | 213.2 | 16665 | 21.3  | 0.0088 |
| 2  | 268.2184 | 32141 | 148.4 | 11600 | 14.8  | 0.0083 |
| 3  | 290.1998 | 30670 | 125.9 | 9840  | 12.6  | 0.0095 |
| 4  | 295.0870 | 31894 | 999.9 | 78176 | 100.0 | 0.0093 |
| 5  | 295.2365 | 30171 | 150.0 | 11731 | 15.0  | 0.0098 |
| 6  | 301.1336 | 31092 | 127.0 | 9927  | 12.7  | 0.0097 |
| 7  | 310.2276 | 33236 | 196.1 | 15332 | 19.6  | 0.0093 |
| 8  | 360.2205 | 33637 | 888.8 | 69487 | 88.9  | 0.0107 |
| 9  | 361.2230 | 26595 | 195.2 | 15258 | 19.5  | 0.0136 |
| 10 | 437.1788 | 30609 | 172.4 | 13479 | 17.2  | 0.0143 |

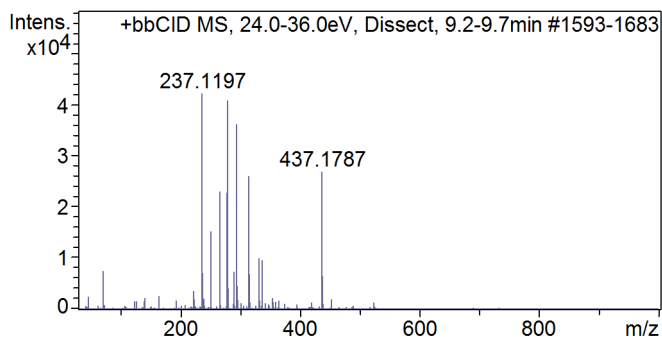

| #  | m/z      | Res.  | S/N   | I     | I %   | FWHM   |
|----|----------|-------|-------|-------|-------|--------|
| 1  | 237.1197 | 30800 | 999.8 | 42248 | 100.0 | 0.0077 |
| 2  | 252.0699 | 30514 | 361.0 | 15254 | 36.1  | 0.0083 |
| 3  | 267.0929 | 30529 | 544.6 | 23015 | 54.5  | 0.0087 |
| 4  | 279.0560 | 30465 | 539.8 | 22810 | 54.0  | 0.0092 |
| 5  | 280.0636 | 30502 | 966.6 | 40844 | 96.7  | 0.0092 |
| 6  | 295.0870 | 32259 | 854.8 | 36120 | 85.5  | 0.0091 |
| 7  | 315.1653 | 31803 | 614.6 | 25969 | 61.5  | 0.0099 |
| 8  | 332.2087 | 32269 | 236.6 | 9999  | 23.7  | 0.0103 |
| 9  | 337.2429 | 30923 | 227.8 | 9628  | 22.8  | 0.0109 |
| 10 | 437.1787 | 31729 | 636.5 | 26898 | 63.7  | 0.0138 |

## Cmpd 75, Dissect, 9.6 min

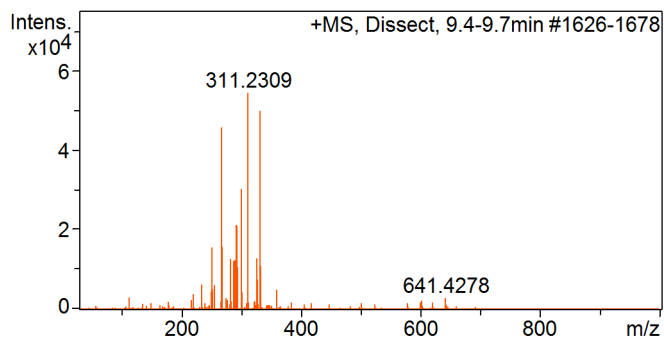

| #  | m/z      | Res.  | S/N   | I     | I %   | FWHM   |
|----|----------|-------|-------|-------|-------|--------|
| 1  | 252.2240 | 31187 | 287.4 | 15658 | 28.8  | 0.0081 |
| 2  | 268.2184 | 32608 | 837.1 | 45610 | 83.8  | 0.0082 |
| 3  | 269.1924 | 32466 | 290.1 | 15808 | 29.0  | 0.0083 |
| 4  | 283.0873 | 31268 | 233.2 | 12706 | 23.3  | 0.0091 |
| 5  | 292.2165 | 31643 | 391.2 | 21318 | 39.2  | 0.0092 |
| 6  | 293.2016 | 31601 | 384.5 | 20953 | 38.5  | 0.0093 |
| 7  | 301.1337 | 30855 | 556.1 | 30300 | 55.7  | 0.0098 |
| 8  | 311.2309 | 33097 | 999.0 | 54436 | 100.0 | 0.0094 |
| 9  | 327.0759 | 31094 | 236.8 | 12904 | 23.7  | 0.0105 |
| 10 | 332.2088 | 32461 | 915.2 | 49869 | 91.6  | 0.0102 |

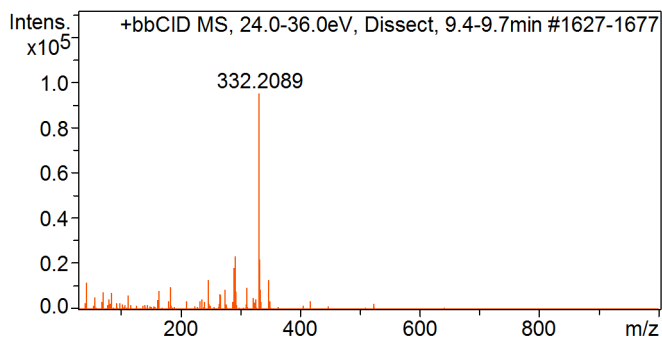

| #  | m/z      | Res.  | S/N   | I     | I %   | FWHM   |
|----|----------|-------|-------|-------|-------|--------|
| 1  | 43.0524  | 15388 | 124.2 | 11837 | 12.4  | 0.0028 |
| 2  | 184.0935 | 29422 | 105.9 | 10094 | 10.6  | 0.0063 |
| 3  | 247.1976 | 30591 | 136.7 | 13030 | 13.7  | 0.0081 |
| 4  | 275.1917 | 30220 | 94.1  | 8970  | 9.4   | 0.0091 |
| 5  | 290.1998 | 31952 | 192.8 | 18371 | 19.3  | 0.0091 |
| 6  | 292.2155 | 32266 | 247.1 | 23554 | 24.7  | 0.0091 |
| 7  | 312.0526 | 30842 | 102.0 | 9718  | 10.2  | 0.0101 |
| 8  | 332.2089 | 33415 | 999.2 | 95237 | 100.0 | 0.0099 |
| 9  | 333.2120 | 32665 | 232.1 | 22121 | 23.2  | 0.0102 |
| 10 | 348.1820 | 32223 | 137.7 | 13125 | 13.8  | 0.0108 |

# Compound Spectrum List Report

## Cmpd 76, Dissect, 9.7 min

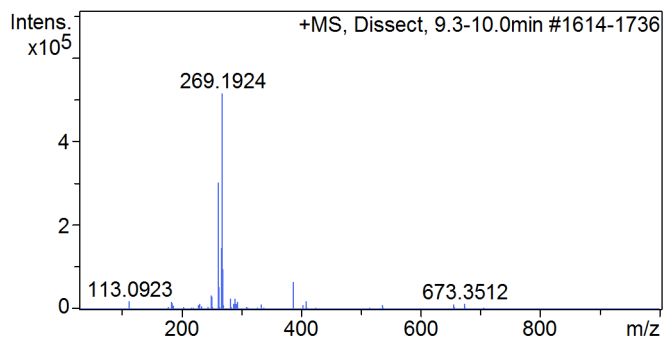

| #  | m/z      | Res.  | S/N   | I      | I %   | FWHM   |
|----|----------|-------|-------|--------|-------|--------|
| 1  | 251.1924 | 29778 | 67.5  | 34845  | 6.8   | 0.0084 |
| 2  | 252.2241 | 31295 | 61.7  | 31876  | 6.2   | 0.0081 |
| 3  | 263.0618 | 33373 | 585.2 | 302293 | 58.6  | 0.0079 |
| 4  | 264.0652 | 30227 | 104.8 | 54124  | 10.5  | 0.0087 |
| 5  | 268.1844 | 29642 | 51.4  | 26556  | 5.1   | 0.0090 |
| 6  | 268.2185 | 33489 | 285.3 | 147355 | 28.6  | 0.0080 |
| 7  | 269.1924 | 35053 | 998.4 | 515739 | 100.0 | 0.0077 |
| 8  | 269.2212 | 28684 | 59.1  | 30531  | 5.9   | 0.0094 |
| 9  | 270.1958 | 31345 | 187.6 | 96906  | 18.8  | 0.0086 |
| 10 | 387.1804 | 33578 | 128.4 | 66301  | 12.9  | 0.0115 |

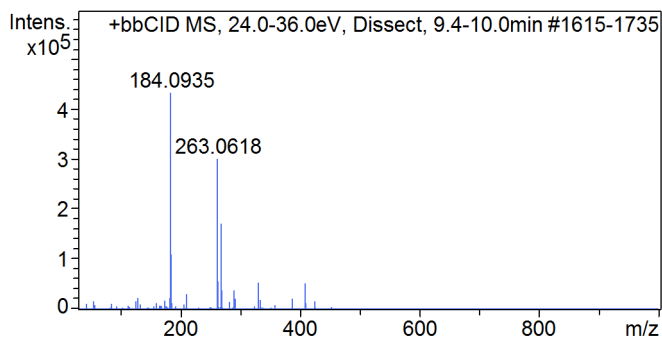

| #  | m/z      | Res.  | S/N   | I      | I %   | FWHM   |
|----|----------|-------|-------|--------|-------|--------|
| 1  | 184.0935 | 30748 | 988.2 | 432285 | 100.0 | 0.0060 |
| 2  | 185.0995 | 22681 | 250.9 | 109759 | 25.4  | 0.0082 |
| 3  | 211.1161 | 29036 | 70.7  | 30911  | 7.2   | 0.0073 |
| 4  | 263.0618 | 33237 | 686.2 | 300185 | 69.4  | 0.0079 |
| 5  | 264.0653 | 30754 | 128.7 | 56316  | 13.0  | 0.0086 |
| 6  | 269.1926 | 31554 | 391.7 | 171335 | 39.6  | 0.0085 |
| 7  | 270.1959 | 30938 | 87.9  | 38453  | 8.9   | 0.0087 |
| 8  | 290.1999 | 31803 | 87.9  | 38469  | 8.9   | 0.0091 |
| 9  | 331.1199 | 32419 | 123.8 | 54144  | 12.5  | 0.0102 |
| 10 | 409.1616 | 32420 | 120.0 | 52484  | 12.1  | 0.0126 |

## Cmpd 77, Dissect, 9.8 min

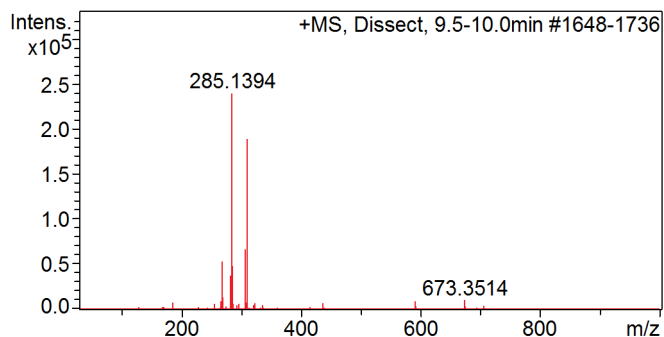

| #  | m/z      | Res.  | S/N   | I      | I %   | FWHM   |
|----|----------|-------|-------|--------|-------|--------|
| 1  | 267.1770 | 29401 | 37.1  | 8948   | 3.7   | 0.0091 |
| 2  | 269.1925 | 34934 | 221.8 | 53444  | 22.3  | 0.0077 |
| 3  | 270.1959 | 31506 | 56.3  | 13555  | 5.7   | 0.0086 |
| 4  | 283.1239 | 31794 | 157.6 | 37972  | 15.8  | 0.0089 |
| 5  | 285.1394 | 33343 | 994.7 | 239660 | 100.0 | 0.0086 |
| 6  | 286.1428 | 31686 | 202.2 | 48727  | 20.3  | 0.0090 |
| 7  | 307.1206 | 31465 | 276.4 | 66589  | 27.8  | 0.0098 |
| 8  | 310.2277 | 34748 | 783.9 | 188878 | 78.8  | 0.0089 |
| 9  | 591.2520 | 33127 | 35.8  | 8617   | 3.6   | 0.0178 |
| 10 | 673.3514 | 31041 | 43.4  | 10465  | 4.4   | 0.0217 |

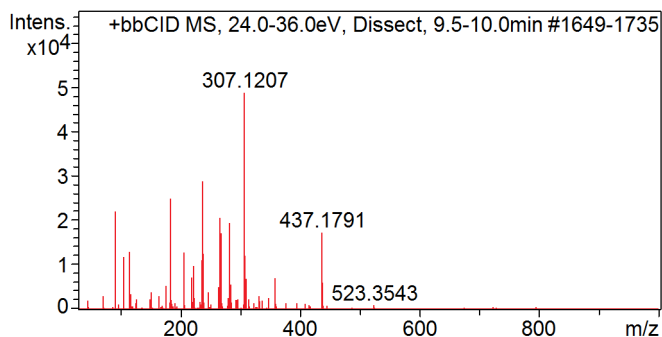

| #  | m/z      | Res.  | S/N   | I     | I %   | FWHM   |
|----|----------|-------|-------|-------|-------|--------|
| 1  | 91.0513  | 20214 | 451.9 | 22096 | 45.3  | 0.0045 |
| 2  | 115.0505 | 22365 | 266.4 | 13024 | 26.7  | 0.0051 |
| 3  | 184.0935 | 30721 | 510.1 | 24942 | 51.1  | 0.0060 |
| 4  | 207.0923 | 28608 | 263.6 | 12889 | 26.4  | 0.0072 |
| 5  | 238.0912 | 28131 | 589.5 | 28823 | 59.1  | 0.0085 |
| 6  | 267.1294 | 31268 | 422.5 | 20658 | 42.4  | 0.0085 |
| 7  | 269.1926 | 31305 | 352.3 | 17224 | 35.3  | 0.0086 |
| 8  | 283.1423 | 31894 | 398.9 | 19505 | 40.0  | 0.0089 |
| 9  | 307.1207 | 32102 | 997.3 | 48765 | 100.0 | 0.0096 |
| 10 | 437.1791 | 32165 | 354.9 | 17355 | 35.6  | 0.0136 |

# Compound Spectrum List Report

## Cmpd 78, Dissect, 9.8 min

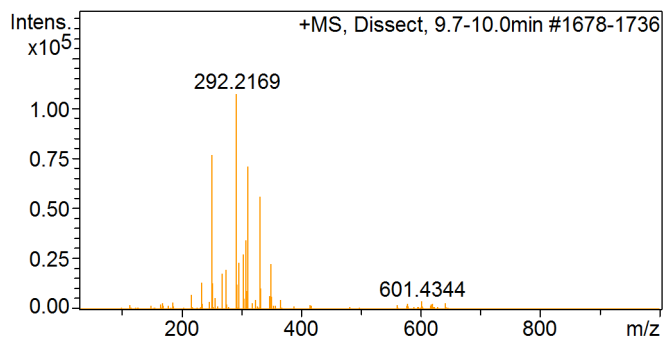

| #  | m/z      | Res.  | S/N   | I      | I %   | FWHM   |
|----|----------|-------|-------|--------|-------|--------|
| 1  | 252.2241 | 31544 | 714.3 | 76599  | 71.5  | 0.0080 |
| 2  | 269.1925 | 33783 | 167.5 | 17965  | 16.8  | 0.0080 |
| 3  | 275.1916 | 30306 | 184.6 | 19791  | 18.5  | 0.0091 |
| 4  | 292.2169 | 32011 | 999.2 | 107150 | 100.0 | 0.0091 |
| 5  | 297.1025 | 31034 | 216.8 | 23246  | 21.7  | 0.0096 |
| 6  | 304.2900 | 32889 | 256.7 | 27533  | 25.7  | 0.0093 |
| 7  | 308.2104 | 31335 | 320.8 | 34405  | 32.1  | 0.0098 |
| 8  | 311.2310 | 32823 | 661.8 | 70969  | 66.2  | 0.0095 |
| 9  | 332.2089 | 32355 | 523.4 | 56130  | 52.4  | 0.0103 |
| 10 | 350.2188 | 31361 | 212.0 | 22737  | 21.2  | 0.0112 |

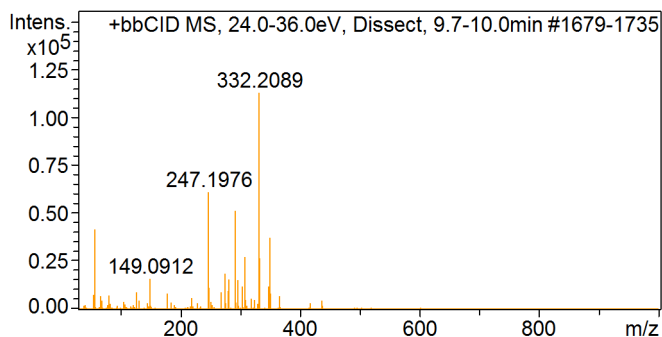

| #  | m/z      | Res.  | S/N   | I      | I %   | FWHM   |
|----|----------|-------|-------|--------|-------|--------|
| 1  | 57.0677  | 17271 | 368.8 | 41753  | 37.0  | 0.0033 |
| 2  | 149.0912 | 26061 | 141.4 | 16012  | 14.2  | 0.0057 |
| 3  | 247.1976 | 31538 | 539.2 | 61045  | 54.1  | 0.0078 |
| 4  | 275.1916 | 30727 | 166.4 | 18840  | 16.7  | 0.0090 |
| 5  | 282.0790 | 29881 | 139.1 | 15749  | 13.9  | 0.0094 |
| 6  | 292.2155 | 32899 | 453.8 | 51379  | 45.5  | 0.0089 |
| 7  | 308.2097 | 32544 | 242.2 | 27419  | 24.3  | 0.0095 |
| 8  | 332.2089 | 33103 | 997.1 | 112895 | 100.0 | 0.0100 |
| 9  | 333.2120 | 32154 | 235.7 | 26681  | 23.6  | 0.0104 |
| 10 | 350.2188 | 32009 | 329.7 | 37330  | 33.1  | 0.0109 |

## Cmpd 79, Dissect, 10.0 min

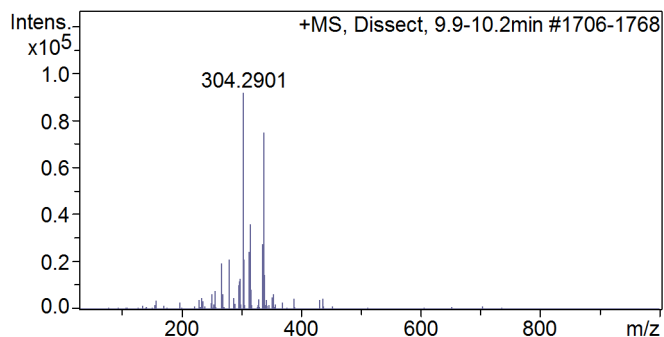

| #  | m/z      | Res.  | S/N   | I     | I %   | FWHM   |
|----|----------|-------|-------|-------|-------|--------|
| 1  | 268.2185 | 32071 | 213.7 | 19614 | 21.4  | 0.0084 |
| 2  | 280.2544 | 31717 | 232.0 | 21294 | 23.2  | 0.0088 |
| 3  | 299.1182 | 30579 | 141.6 | 12995 | 14.2  | 0.0098 |
| 4  | 304.2901 | 33209 | 999.9 | 91764 | 100.0 | 0.0092 |
| 5  | 305.2932 | 31645 | 231.5 | 21250 | 23.2  | 0.0096 |
| 6  | 314.2589 | 32969 | 266.4 | 24446 | 26.6  | 0.0095 |
| 7  | 316.2744 | 33311 | 393.5 | 36110 | 39.4  | 0.0095 |
| 8  | 336.2401 | 32990 | 300.6 | 27585 | 30.1  | 0.0102 |
| 9  | 338.2556 | 33196 | 813.6 | 74673 | 81.4  | 0.0102 |
| 10 | 339.2588 | 31264 | 161.9 | 14855 | 16.2  | 0.0109 |

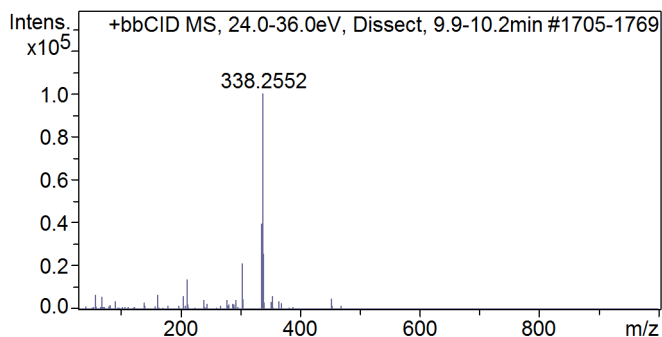

| #  | m/z      | Res.  | S/N   | I      | I %   | FWHM   |
|----|----------|-------|-------|--------|-------|--------|
| 1  | 58.0629  | 17280 | 69.4  | 6962   | 6.9   | 0.0034 |
| 2  | 69.0673  | 18217 | 59.7  | 5989   | 6.0   | 0.0038 |
| 3  | 163.0335 | 26178 | 68.5  | 6866   | 6.9   | 0.0062 |
| 4  | 206.1085 | 28247 | 63.2  | 6334   | 6.3   | 0.0073 |
| 5  | 212.2302 | 29648 | 139.9 | 14025  | 14.0  | 0.0072 |
| 6  | 304.2897 | 32367 | 213.1 | 21370  | 21.3  | 0.0094 |
| 7  | 336.2398 | 34469 | 396.8 | 39797  | 39.7  | 0.0098 |
| 8  | 338.2552 | 33411 | 998.9 | 100175 | 100.0 | 0.0101 |
| 9  | 339.2586 | 32868 | 257.6 | 25830  | 25.8  | 0.0103 |
| 10 | 354.2284 | 29283 | 63.6  | 6381   | 6.4   | 0.0121 |



# Compound Spectrum List Report

## Cmpd 80, Dissect, 10.1 min

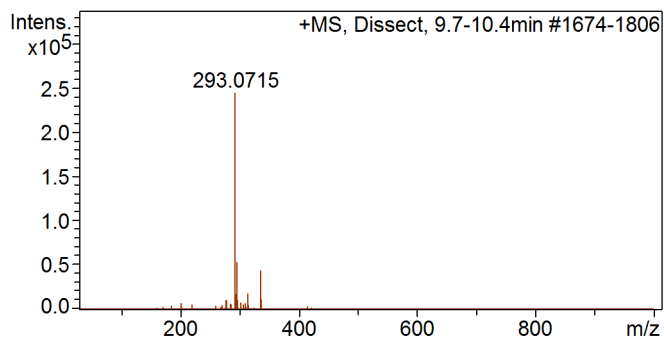

| #  | m/z      | Res.  | S/N   | I      | I %   | FWHM   |
|----|----------|-------|-------|--------|-------|--------|
| 1  | 278.2389 | 30526 | 43.9  | 10761  | 4.4   | 0.0091 |
| 2  | 279.2229 | 30840 | 39.3  | 9641   | 3.9   | 0.0091 |
| 3  | 293.0715 | 33526 | 998.5 | 244707 | 100.0 | 0.0087 |
| 4  | 293.2203 | 28955 | 48.7  | 11929  | 4.9   | 0.0101 |
| 5  | 294.0749 | 32007 | 70.8  | 17354  | 7.1   | 0.0092 |
| 6  | 296.2489 | 32691 | 218.7 | 53607  | 21.9  | 0.0091 |
| 7  | 297.2522 | 31109 | 44.2  | 10824  | 4.4   | 0.0096 |
| 8  | 314.2589 | 32818 | 73.6  | 18042  | 7.4   | 0.0096 |
| 9  | 336.2401 | 32882 | 182.2 | 44645  | 18.2  | 0.0102 |
| 10 | 337.2433 | 32158 | 48.8  | 11960  | 4.9   | 0.0105 |

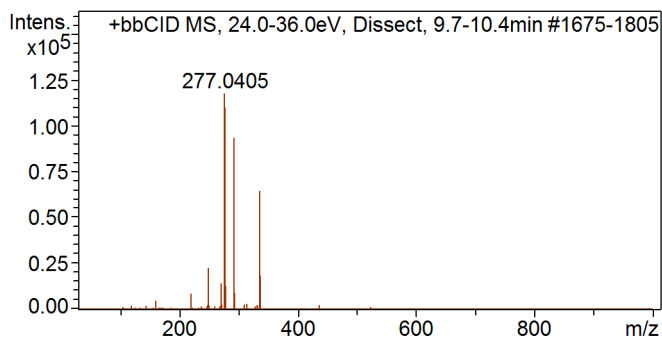

| #  | m/z      | Res.  | S/N   | I      | I %   | FWHM   |
|----|----------|-------|-------|--------|-------|--------|
| 1  | 250.0543 | 30889 | 192.4 | 22659  | 19.3  | 0.0081 |
| 2  | 271.1242 | 31107 | 121.8 | 14350  | 12.2  | 0.0087 |
| 3  | 277.0405 | 33023 | 998.4 | 117589 | 100.0 | 0.0084 |
| 4  | 277.2073 | 30404 | 94.6  | 11146  | 9.5   | 0.0091 |
| 5  | 278.0477 | 30881 | 931.1 | 109658 | 93.3  | 0.0090 |
| 6  | 279.0513 | 29255 | 110.7 | 13043  | 11.1  | 0.0095 |
| 7  | 293.0714 | 33350 | 793.0 | 93400  | 79.4  | 0.0088 |
| 8  | 294.0747 | 31592 | 77.0  | 9064   | 7.7   | 0.0093 |
| 9  | 336.2398 | 34557 | 548.9 | 64643  | 55.0  | 0.0097 |
| 10 | 337.2431 | 32734 | 157.0 | 18491  | 15.7  | 0.0103 |

## Cmpd 81, Dissect, 10.3 min

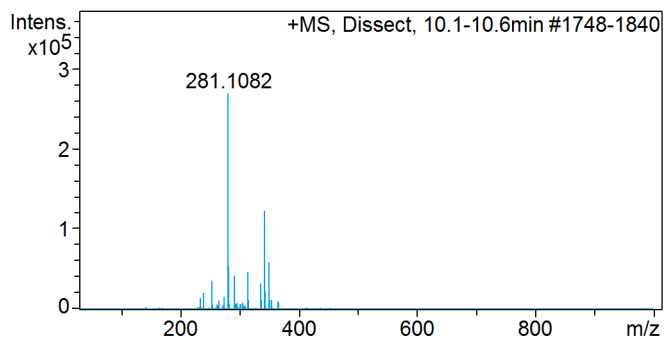

| #  | m/z      | Res.  | S/N   | I      | I %   | FWHM   |
|----|----------|-------|-------|--------|-------|--------|
| 1  | 254.2396 | 29598 | 133.1 | 35894  | 13.3  | 0.0086 |
| 2  | 281.1082 | 32462 | 999.6 | 269592 | 100.0 | 0.0087 |
| 3  | 282.1116 | 30534 | 176.4 | 47571  | 17.6  | 0.0092 |
| 4  | 282.2337 | 31142 | 198.0 | 53403  | 19.8  | 0.0091 |
| 5  | 292.2174 | 31335 | 158.4 | 42710  | 15.8  | 0.0093 |
| 6  | 314.2588 | 32401 | 175.6 | 47351  | 17.6  | 0.0097 |
| 7  | 336.2400 | 33027 | 122.8 | 33127  | 12.3  | 0.0102 |
| 8  | 343.2843 | 32799 | 457.1 | 123285 | 45.7  | 0.0105 |
| 9  | 344.2875 | 30553 | 88.3  | 23826  | 8.8   | 0.0113 |
| 10 | 350.2189 | 32083 | 219.1 | 59099  | 21.9  | 0.0109 |

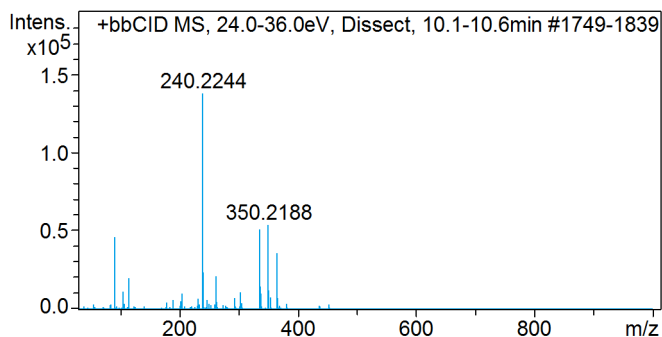

| #  | m/z      | Res.  | S/N   | I      | I %   | FWHM   |
|----|----------|-------|-------|--------|-------|--------|
| 1  | 91.0513  | 20225 | 334.6 | 46167  | 33.5  | 0.0045 |
| 2  | 115.0505 | 22179 | 145.4 | 20053  | 14.5  | 0.0052 |
| 3  | 240.2244 | 31361 | 999.4 | 137869 | 100.0 | 0.0077 |
| 4  | 241.2277 | 29610 | 172.5 | 23790  | 17.3  | 0.0081 |
| 5  | 263.0982 | 31205 | 155.6 | 21462  | 15.6  | 0.0084 |
| 6  | 336.2400 | 33380 | 372.2 | 51352  | 37.2  | 0.0101 |
| 7  | 337.2432 | 32289 | 106.5 | 14695  | 10.7  | 0.0104 |
| 8  | 350.2188 | 33127 | 390.8 | 53915  | 39.1  | 0.0106 |
| 9  | 351.2219 | 31378 | 90.8  | 12524  | 9.1   | 0.0112 |
| 10 | 365.2655 | 32471 | 261.6 | 36086  | 26.2  | 0.0112 |

# Compound Spectrum List Report

## Cmpd 82, Dissect, 10.4 min

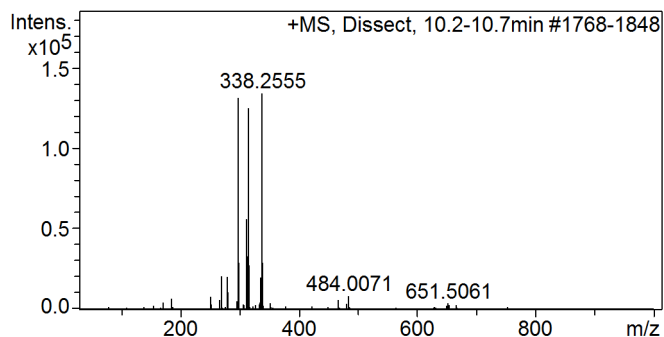

| #  | m/z      | Res.  | S/N   | I      | I %   | FWHM   |
|----|----------|-------|-------|--------|-------|--------|
| 1  | 270.2341 | 30908 | 155.3 | 20898  | 15.5  | 0.0087 |
| 2  | 280.2544 | 31084 | 151.6 | 20404  | 15.2  | 0.0090 |
| 3  | 298.2644 | 31941 | 976.9 | 131484 | 97.7  | 0.0093 |
| 4  | 299.2678 | 30535 | 218.1 | 29356  | 21.8  | 0.0098 |
| 5  | 312.2433 | 33526 | 416.6 | 56073  | 41.7  | 0.0093 |
| 6  | 314.2588 | 32346 | 246.5 | 33171  | 24.7  | 0.0097 |
| 7  | 316.2744 | 33076 | 927.3 | 124802 | 92.8  | 0.0096 |
| 8  | 317.2778 | 32093 | 205.7 | 27679  | 20.6  | 0.0099 |
| 9  | 338.2555 | 33532 | 999.6 | 134542 | 100.0 | 0.0101 |
| 10 | 339.2588 | 31943 | 217.7 | 29305  | 21.8  | 0.0106 |

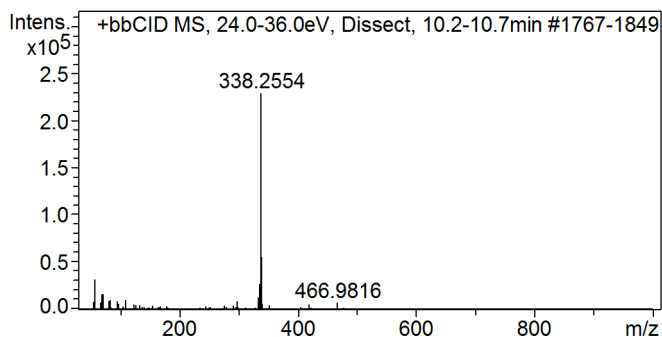

| #  | m/z      | Res.  | S/N   | I      | I %   | FWHM   |
|----|----------|-------|-------|--------|-------|--------|
| 1  | 57.0677  | 17332 | 139.7 | 32058  | 14.0  | 0.0033 |
| 2  | 69.0673  | 18246 | 71.4  | 16389  | 7.2   | 0.0038 |
| 3  | 71.0829  | 18475 | 70.9  | 16275  | 7.1   | 0.0038 |
| 4  | 81.0671  | 19327 | 37.5  | 8601   | 3.8   | 0.0042 |
| 5  | 83.0827  | 19336 | 42.6  | 9781   | 4.3   | 0.0043 |
| 6  | 109.0977 | 21835 | 44.4  | 10198  | 4.5   | 0.0050 |
| 7  | 334.2243 | 33958 | 57.0  | 13074  | 5.7   | 0.0098 |
| 8  | 336.2400 | 33232 | 118.3 | 27155  | 11.9  | 0.0101 |
| 9  | 338.2554 | 34239 | 997.4 | 228921 | 100.0 | 0.0099 |
| 10 | 339.2587 | 33148 | 241.6 | 55462  | 24.2  | 0.0102 |

## Cmpd 83, Dissect, 10.5 min

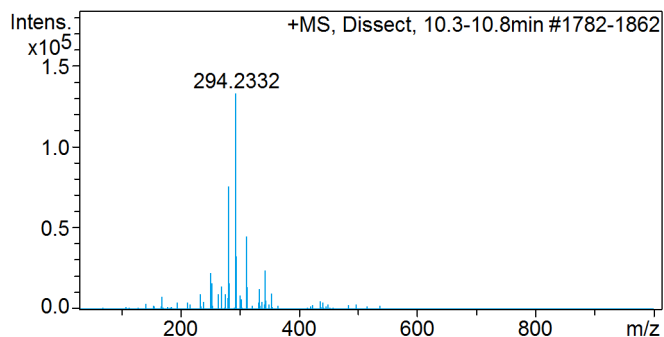

| #  | m/z      | Res.  | S/N   | I      | I %   | FWHM   |
|----|----------|-------|-------|--------|-------|--------|
| 1  | 252.2240 | 31010 | 168.5 | 22430  | 16.9  | 0.0081 |
| 2  | 254.2395 | 28892 | 122.8 | 16337  | 12.3  | 0.0088 |
| 3  | 270.2341 | 31367 | 106.8 | 14216  | 10.7  | 0.0086 |
| 4  | 282.2337 | 31911 | 569.0 | 75722  | 57.0  | 0.0088 |
| 5  | 283.2369 | 30505 | 122.0 | 16242  | 12.2  | 0.0093 |
| 6  | 294.2332 | 31871 | 998.2 | 132847 | 100.0 | 0.0092 |
| 7  | 295.2365 | 31709 | 245.8 | 32711  | 24.6  | 0.0093 |
| 8  | 312.2433 | 33432 | 337.3 | 44894  | 33.8  | 0.0093 |
| 9  | 313.2465 | 30586 | 105.0 | 13978  | 10.5  | 0.0102 |
| 10 | 343.2844 | 32128 | 182.4 | 24274  | 18.3  | 0.0107 |

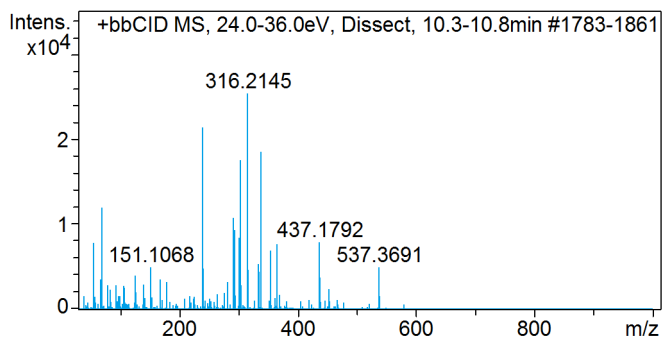

| #  | m/z      | Res.  | S/N   | I     | I %   | FWHM   |
|----|----------|-------|-------|-------|-------|--------|
| 1  | 55.0521  | 17265 | 308.8 | 7857  | 30.9  | 0.0032 |
| 2  | 69.0674  | 18320 | 472.1 | 12010 | 47.2  | 0.0038 |
| 3  | 240.2245 | 30812 | 841.3 | 21405 | 84.2  | 0.0078 |
| 4  | 292.2154 | 32029 | 424.9 | 10811 | 42.5  | 0.0091 |
| 5  | 294.2325 | 31267 | 366.6 | 9327  | 36.7  | 0.0094 |
| 6  | 301.1338 | 30355 | 331.4 | 8433  | 33.2  | 0.0099 |
| 7  | 304.2149 | 31319 | 688.7 | 17522 | 68.9  | 0.0097 |
| 8  | 316.2145 | 31892 | 999.5 | 25429 | 100.0 | 0.0099 |
| 9  | 338.2555 | 33969 | 726.7 | 18490 | 72.7  | 0.0100 |
| 10 | 437.1792 | 31712 | 311.8 | 7934  | 31.2  | 0.0138 |

# Compound Spectrum List Report

## Cmpd 84, Dissect, 10.6 min

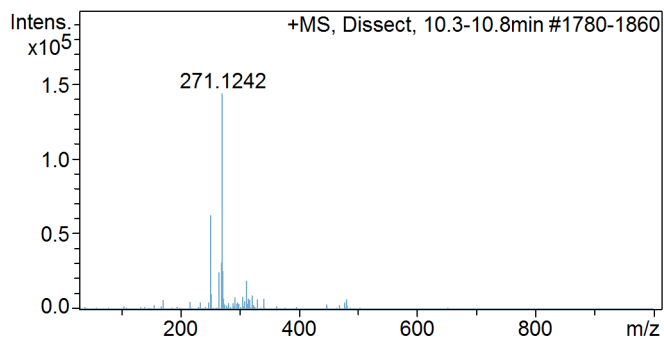

| #  | m/z      | Res.  | S/N   | I      | I %   | FWHM   |
|----|----------|-------|-------|--------|-------|--------|
| 1  | 252.2240 | 31258 | 433.7 | 62466  | 43.5  | 0.0081 |
| 2  | 253.2079 | 29817 | 68.0  | 9794   | 6.8   | 0.0085 |
| 3  | 253.2273 | 29211 | 72.0  | 10364  | 7.2   | 0.0087 |
| 4  | 266.2392 | 30519 | 173.9 | 25049  | 17.4  | 0.0087 |
| 5  | 270.2341 | 31438 | 217.7 | 31353  | 21.8  | 0.0086 |
| 6  | 271.1242 | 32327 | 998.1 | 143764 | 100.0 | 0.0084 |
| 7  | 271.2375 | 30402 | 109.1 | 15710  | 10.9  | 0.0089 |
| 8  | 272.1275 | 30543 | 177.1 | 25507  | 17.7  | 0.0089 |
| 9  | 312.2433 | 33351 | 134.0 | 19301  | 13.4  | 0.0094 |
| 10 | 322.2247 | 29870 | 66.0  | 9505   | 6.6   | 0.0108 |

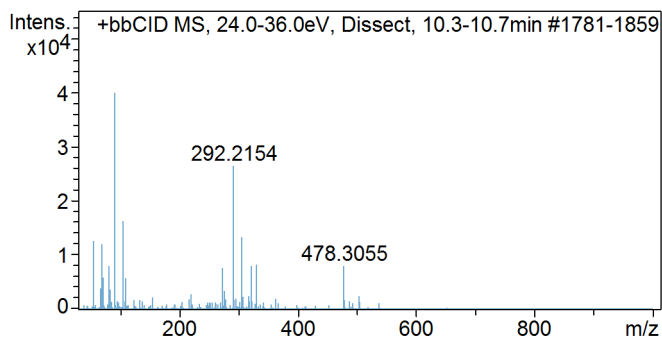

| #  | m/z      | Res.  | S/N    | I     | I %   | FWHM   |
|----|----------|-------|--------|-------|-------|--------|
| 1  | 55.0520  | 17266 | 317.4  | 12690 | 31.7  | 0.0032 |
| 2  | 69.0674  | 18274 | 301.5  | 12054 | 30.1  | 0.0038 |
| 3  | 81.0671  | 19376 | 202.3  | 8088  | 20.2  | 0.0042 |
| 4  | 91.0513  | 20181 | 1000.0 | 39979 | 100.0 | 0.0045 |
| 5  | 105.0665 | 21262 | 408.4  | 16327 | 40.8  | 0.0049 |
| 6  | 292.2154 | 32146 | 661.4  | 26442 | 66.1  | 0.0091 |
| 7  | 306.2303 | 30942 | 335.1  | 13397 | 33.5  | 0.0099 |
| 8  | 322.2248 | 30625 | 202.6  | 8100  | 20.3  | 0.0105 |
| 9  | 331.2060 | 31073 | 206.7  | 8264  | 20.7  | 0.0107 |
| 10 | 478.3055 | 30342 | 201.2  | 8044  | 20.1  | 0.0158 |

## Cmpd 85, Dissect, 10.7 min

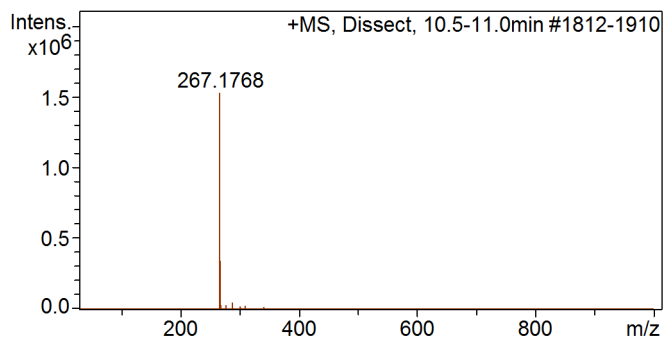

| #  | m/z      | Res.  | S/N   | I       | I %   | FWHM   |
|----|----------|-------|-------|---------|-------|--------|
| 1  | 267.1768 | 36825 | 987.2 | 1529121 | 100.0 | 0.0073 |
| 2  | 268.1803 | 33416 | 223.6 | 346326  | 22.6  | 0.0080 |
| 3  | 269.1842 | 25472 | 17.8  | 27568   | 1.8   | 0.0106 |
| 4  | 278.2389 | 31053 | 18.2  | 28230   | 1.8   | 0.0090 |
| 5  | 288.2440 | 31466 | 31.6  | 48902   | 3.2   | 0.0092 |
| 6  | 289.2473 | 30156 | 5.6   | 8621    | 0.6   | 0.0096 |
| 7  | 301.1334 | 30144 | 13.2  | 20462   | 1.3   | 0.0100 |
| 8  | 302.2955 | 30051 | 6.4   | 9970    | 0.7   | 0.0101 |
| 9  | 310.2254 | 30439 | 15.6  | 24144   | 1.6   | 0.0102 |
| 10 | 341.2323 | 31362 | 9.3   | 14476   | 0.9   | 0.0109 |

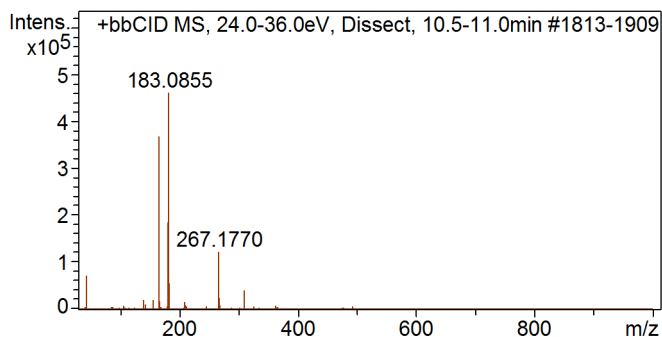

| #  | m/z      | Res.  | S/N   | I      | I %   | FWHM   |
|----|----------|-------|-------|--------|-------|--------|
| 1  | 43.0524  | 15453 | 156.2 | 72323  | 15.7  | 0.0028 |
| 2  | 156.0756 | 26017 | 46.3  | 21448  | 4.7   | 0.0060 |
| 3  | 166.0596 | 29169 | 794.6 | 367925 | 79.8  | 0.0057 |
| 4  | 167.0668 | 25502 | 361.4 | 167352 | 36.3  | 0.0066 |
| 5  | 182.0778 | 29741 | 401.5 | 185932 | 40.3  | 0.0061 |
| 6  | 183.0855 | 30410 | 995.5 | 460969 | 100.0 | 0.0060 |
| 7  | 184.0892 | 25992 | 121.8 | 56407  | 12.2  | 0.0071 |
| 8  | 267.1770 | 31967 | 264.5 | 122454 | 26.6  | 0.0084 |
| 9  | 268.1803 | 30900 | 55.5  | 25678  | 5.6   | 0.0087 |
| 10 | 310.2254 | 31699 | 90.4  | 41868  | 9.1   | 0.0098 |

# Compound Spectrum List Report

## Cmpd 86, Dissect, 10.9 min

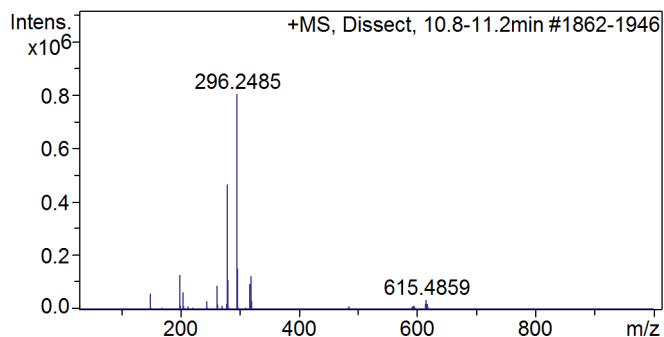

| #  | m/z      | Res.  | S/N   | I      | I %   | FWHM   |
|----|----------|-------|-------|--------|-------|--------|
| 1  | 149.0185 | 26243 | 74.4  | 59800  | 7.4   | 0.0057 |
| 2  | 200.1942 | 29469 | 160.0 | 128635 | 16.0  | 0.0068 |
| 3  | 205.0791 | 30103 | 82.2  | 66061  | 8.2   | 0.0068 |
| 4  | 263.2283 | 32628 | 111.0 | 89263  | 11.1  | 0.0081 |
| 5  | 280.2541 | 36762 | 579.4 | 465758 | 58.0  | 0.0076 |
| 6  | 281.2577 | 32935 | 137.1 | 110201 | 13.7  | 0.0085 |
| 7  | 296.2485 | 38196 | 999.3 | 803286 | 100.0 | 0.0078 |
| 8  | 297.2519 | 35634 | 190.0 | 152748 | 19.0  | 0.0083 |
| 9  | 318.2299 | 34687 | 120.6 | 96927  | 12.1  | 0.0092 |
| 10 | 320.2454 | 35162 | 155.5 | 124985 | 15.6  | 0.0091 |

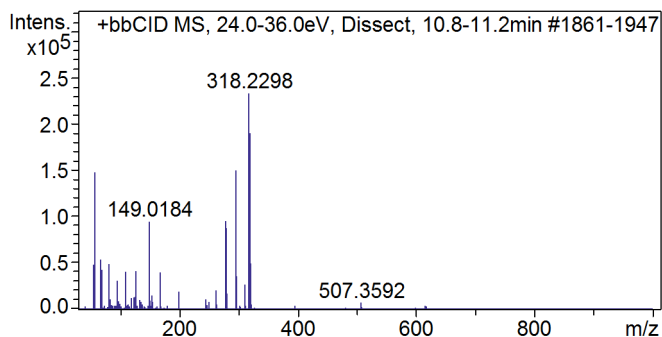

| #  | m/z      | Res.  | S/N   | I      | I %   | FWHM   |
|----|----------|-------|-------|--------|-------|--------|
| 1  | 57.0677  | 17718 | 631.7 | 147493 | 63.2  | 0.0032 |
| 2  | 67.0518  | 18421 | 232.5 | 54284  | 23.3  | 0.0036 |
| 3  | 81.0670  | 20110 | 211.6 | 49400  | 21.2  | 0.0040 |
| 4  | 149.0184 | 27052 | 404.3 | 94395  | 40.4  | 0.0055 |
| 5  | 279.2228 | 33384 | 409.6 | 95646  | 41.0  | 0.0084 |
| 6  | 280.2544 | 33088 | 375.2 | 87618  | 37.5  | 0.0085 |
| 7  | 296.2487 | 34369 | 642.3 | 149987 | 64.2  | 0.0086 |
| 8  | 318.2298 | 36947 | 999.9 | 233466 | 100.0 | 0.0086 |
| 9  | 320.2454 | 35874 | 812.5 | 189718 | 81.3  | 0.0089 |
| 10 | 321.2489 | 32935 | 214.8 | 50157  | 21.5  | 0.0098 |

## Cmpd 87, Dissect, 11.1 min

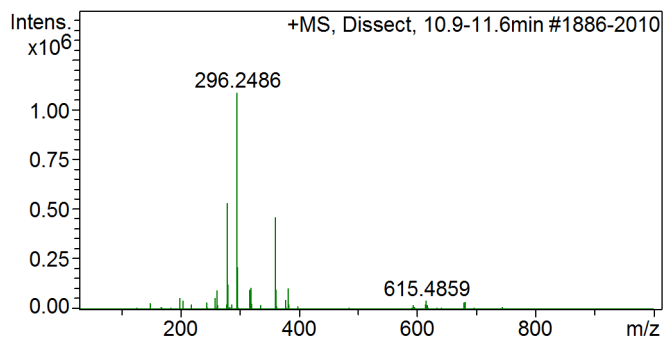

| #  | m/z      | Res.  | S/N   | I       | I %   | FWHM   |
|----|----------|-------|-------|---------|-------|--------|
| 1  | 263.2283 | 32567 | 86.6  | 98500   | 9.1   | 0.0081 |
| 2  | 280.2541 | 37235 | 467.4 | 531404  | 49.0  | 0.0075 |
| 3  | 281.2577 | 33154 | 111.1 | 126292  | 11.6  | 0.0085 |
| 4  | 296.2486 | 34519 | 954.6 | 1085254 | 100.0 | 0.0086 |
| 5  | 297.2519 | 36927 | 186.8 | 212360  | 19.6  | 0.0080 |
| 6  | 318.2298 | 35373 | 88.0  | 100057  | 9.2   | 0.0090 |
| 7  | 320.2454 | 35038 | 98.3  | 111796  | 10.3  | 0.0091 |
| 8  | 361.2101 | 39007 | 407.0 | 462687  | 42.6  | 0.0093 |
| 9  | 362.2135 | 32892 | 87.4  | 99401   | 9.2   | 0.0110 |
| 10 | 383.1911 | 33625 | 93.4  | 106211  | 9.8   | 0.0114 |

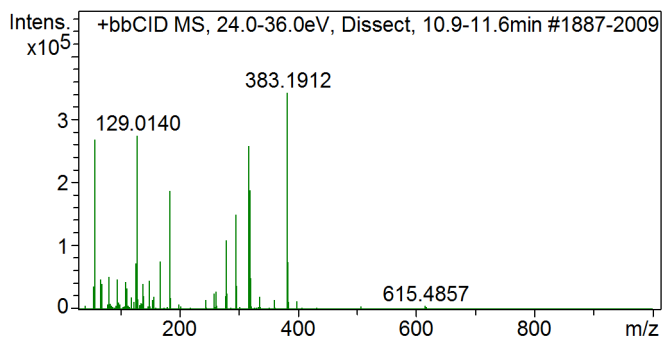

| #  | m/z      | Res.  | S/N   | I      | I %   | FWHM   |
|----|----------|-------|-------|--------|-------|--------|
| 1  | 57.0677  | 17748 | 781.0 | 267326 | 78.1  | 0.0032 |
| 2  | 129.0140 | 25133 | 800.2 | 273889 | 80.1  | 0.0051 |
| 3  | 169.1166 | 27554 | 223.5 | 76493  | 22.4  | 0.0061 |
| 4  | 185.0747 | 30213 | 545.9 | 186863 | 54.6  | 0.0061 |
| 5  | 280.2542 | 33529 | 319.7 | 109446 | 32.0  | 0.0084 |
| 6  | 296.2486 | 35911 | 438.6 | 150142 | 43.9  | 0.0082 |
| 7  | 318.2298 | 38310 | 751.6 | 257262 | 75.2  | 0.0083 |
| 8  | 320.2453 | 36159 | 550.5 | 188444 | 55.1  | 0.0089 |
| 9  | 383.1912 | 37560 | 999.5 | 342136 | 100.0 | 0.0102 |
| 10 | 384.1947 | 33370 | 220.4 | 75431  | 22.0  | 0.0115 |

# Compound Spectrum List Report

## Cmpd 88, Dissect, 11.2 min

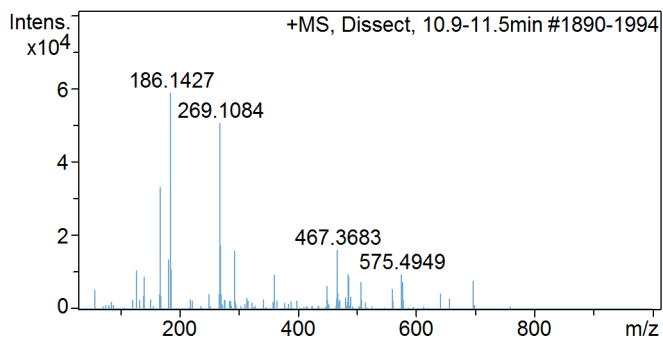

| #  | m/z      | Res.  | S/N    | I     | I %   | FWHM   |
|----|----------|-------|--------|-------|-------|--------|
| 1  | 128.1391 | 23086 | 180.2  | 10605 | 18.0  | 0.0056 |
| 2  | 169.1166 | 26839 | 565.5  | 33284 | 56.6  | 0.0063 |
| 3  | 183.1318 | 26701 | 230.1  | 13543 | 23.0  | 0.0069 |
| 4  | 186.1427 | 28092 | 1000.0 | 58849 | 100.0 | 0.0066 |
| 5  | 187.1267 | 27511 | 185.0  | 10885 | 18.5  | 0.0068 |
| 6  | 269.1084 | 30669 | 859.2  | 50565 | 85.9  | 0.0088 |
| 7  | 270.1117 | 29401 | 295.5  | 17390 | 29.6  | 0.0092 |
| 8  | 294.2329 | 28468 | 272.1  | 16014 | 27.2  | 0.0103 |
| 9  | 467.3683 | 30512 | 276.0  | 16243 | 27.6  | 0.0153 |
| 10 | 575.4949 | 31695 | 164.0  | 9650  | 16.4  | 0.0182 |

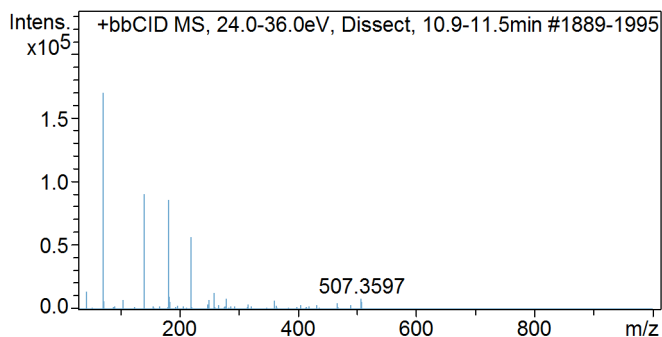

| #  | m/z      | Res.  | S/N   | I      | I %   | FWHM   |
|----|----------|-------|-------|--------|-------|--------|
| 1  | 43.0525  | 15305 | 82.7  | 14031  | 8.3   | 0.0028 |
| 2  | 71.0465  | 18470 | 139.5 | 23648  | 13.9  | 0.0038 |
| 3  | 71.0829  | 19374 | 999.8 | 169537 | 100.0 | 0.0037 |
| 4  | 141.1226 | 25377 | 531.7 | 90155  | 53.2  | 0.0056 |
| 5  | 183.1318 | 28102 | 505.8 | 85771  | 50.6  | 0.0065 |
| 6  | 184.1346 | 22944 | 60.1  | 10192  | 6.0   | 0.0080 |
| 7  | 220.1236 | 29448 | 333.7 | 56579  | 33.4  | 0.0075 |
| 8  | 259.1454 | 30687 | 78.5  | 13307  | 7.8   | 0.0084 |
| 9  | 280.2542 | 34044 | 52.8  | 8955   | 5.3   | 0.0082 |
| 10 | 507.3597 | 30343 | 51.8  | 8788   | 5.2   | 0.0167 |

## Cmpd 89, Dissect, 11.2 min

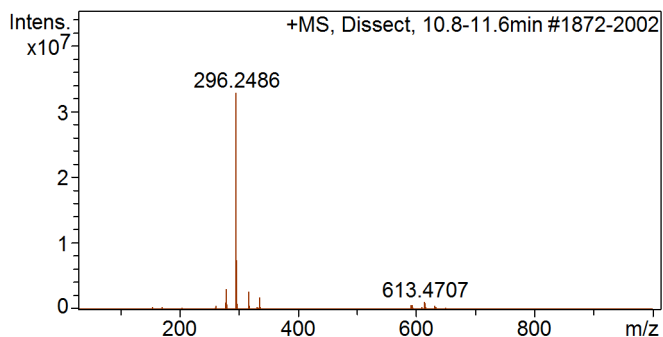

| #  | m/z      | Res.  | S/N   | I        | I %   | FWHM   |
|----|----------|-------|-------|----------|-------|--------|
| 1  | 279.2226 | 35047 | 29.4  | 969135   | 3.0   | 0.0080 |
| 2  | 280.2541 | 37361 | 94.4  | 3112075  | 9.5   | 0.0075 |
| 3  | 281.2576 | 33355 | 22.8  | 751353   | 2.3   | 0.0084 |
| 4  | 296.2486 | 30121 | 995.7 | 32822248 | 100.0 | 0.0098 |
| 5  | 297.2518 | 37381 | 228.2 | 7521699  | 22.9  | 0.0080 |
| 6  | 298.2555 | 27284 | 25.1  | 827846   | 2.5   | 0.0109 |
| 7  | 318.2298 | 35608 | 84.7  | 2790508  | 8.5   | 0.0089 |
| 8  | 336.2397 | 33624 | 56.7  | 1869422  | 5.7   | 0.0100 |
| 9  | 613.4707 | 33022 | 33.0  | 1088617  | 3.3   | 0.0186 |
| 10 | 615.4856 | 31042 | 27.1  | 894035   | 2.7   | 0.0198 |

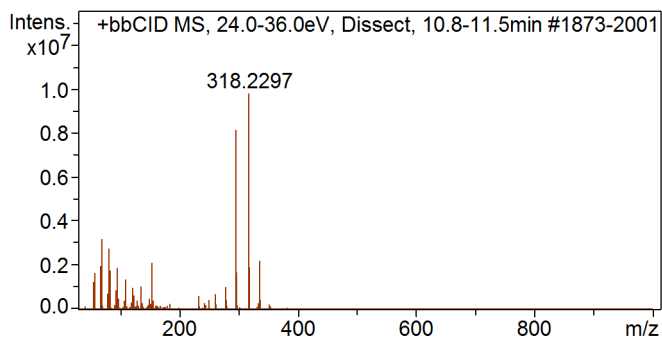

| #  | m/z      | Res.  | S/N   | I       | I %   | FWHM   |
|----|----------|-------|-------|---------|-------|--------|
| 1  | 67.0518  | 18706 | 201.8 | 1984970 | 20.2  | 0.0036 |
| 2  | 69.0673  | 19110 | 325.0 | 3196413 | 32.6  | 0.0036 |
| 3  | 81.0670  | 20383 | 281.3 | 2767126 | 28.2  | 0.0040 |
| 4  | 83.0825  | 20200 | 182.1 | 1791128 | 18.2  | 0.0041 |
| 5  | 95.0824  | 21261 | 194.1 | 1908846 | 19.4  | 0.0045 |
| 6  | 153.1222 | 27003 | 217.4 | 2138231 | 21.8  | 0.0057 |
| 7  | 296.2485 | 36969 | 827.6 | 8140231 | 82.9  | 0.0080 |
| 8  | 318.2297 | 38735 | 997.9 | 9814987 | 100.0 | 0.0082 |
| 9  | 319.2332 | 33384 | 196.0 | 1927499 | 19.6  | 0.0096 |
| 10 | 336.2398 | 34554 | 226.2 | 2224745 | 22.7  | 0.0097 |

# Compound Spectrum List Report

## Cmpd 90, Dissect, 11.3 min

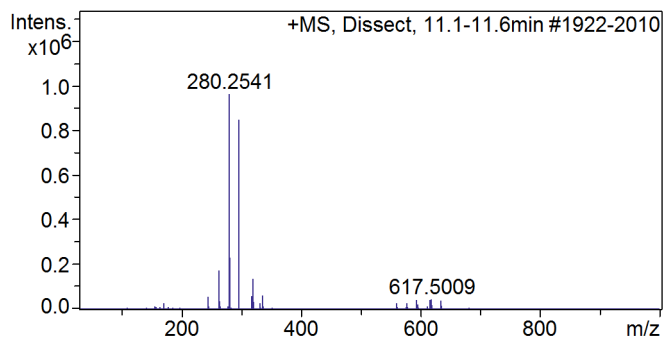

| #  | m/z      | Res.  | S/N   | I      | I %   | FWHM   |
|----|----------|-------|-------|--------|-------|--------|
| 1  | 245.2183 | 29771 | 59.4  | 57661  | 6.0   | 0.0082 |
| 2  | 263.2283 | 33376 | 182.1 | 176658 | 18.3  | 0.0079 |
| 3  | 280.2541 | 37584 | 992.8 | 963285 | 100.0 | 0.0075 |
| 4  | 281.2576 | 33937 | 239.3 | 232202 | 24.1  | 0.0083 |
| 5  | 296.2485 | 33834 | 871.8 | 845855 | 87.8  | 0.0088 |
| 6  | 297.2518 | 36692 | 157.4 | 152738 | 15.9  | 0.0081 |
| 7  | 318.2298 | 35004 | 63.5  | 61629  | 6.4   | 0.0091 |
| 8  | 320.2453 | 35525 | 143.5 | 139277 | 14.5  | 0.0090 |
| 9  | 336.2398 | 33603 | 65.6  | 63624  | 6.6   | 0.0100 |
| 10 | 617.5009 | 29728 | 48.6  | 47190  | 4.9   | 0.0208 |

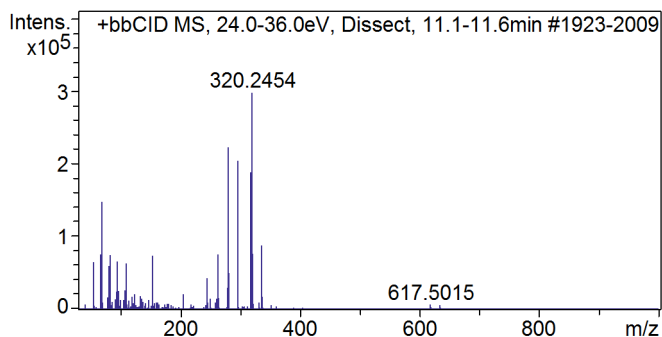

| #  | m/z      | Res.  | S/N   | I      | I %   | FWHM   |
|----|----------|-------|-------|--------|-------|--------|
| 1  | 67.0518  | 18634 | 255.6 | 76199  | 25.6  | 0.0036 |
| 2  | 69.0673  | 19151 | 497.2 | 148236 | 49.8  | 0.0036 |
| 3  | 83.0825  | 20330 | 252.8 | 75370  | 25.3  | 0.0041 |
| 4  | 263.2284 | 31819 | 255.2 | 76095  | 25.6  | 0.0083 |
| 5  | 280.2543 | 34312 | 747.1 | 222742 | 74.8  | 0.0082 |
| 6  | 296.2486 | 36281 | 685.0 | 204245 | 68.6  | 0.0082 |
| 7  | 318.2298 | 37904 | 630.0 | 187835 | 63.1  | 0.0084 |
| 8  | 320.2454 | 37185 | 998.1 | 297592 | 100.0 | 0.0086 |
| 9  | 321.2488 | 33222 | 257.2 | 76689  | 25.8  | 0.0097 |
| 10 | 336.2398 | 34067 | 296.4 | 88383  | 29.7  | 0.0099 |

## Cmpd 91, Dissect, 11.4 min

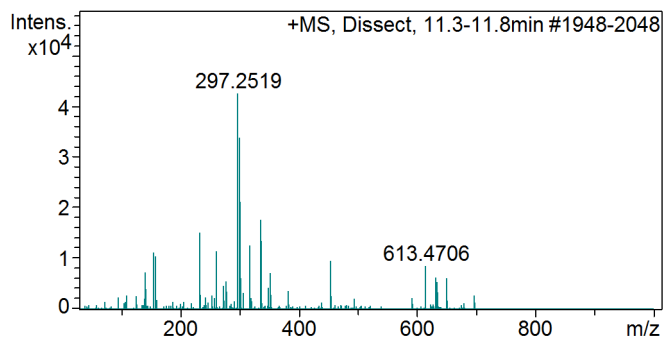

| #  | m/z      | Res.  | S/N   | I     | I %   | FWHM   |
|----|----------|-------|-------|-------|-------|--------|
| 1  | 155.1015 | 25658 | 263.8 | 11254 | 26.4  | 0.0060 |
| 2  | 158.1123 | 25825 | 245.2 | 10462 | 24.5  | 0.0061 |
| 3  | 233.2187 | 29152 | 356.0 | 15188 | 35.6  | 0.0080 |
| 4  | 261.2127 | 30179 | 269.6 | 11500 | 27.0  | 0.0087 |
| 5  | 297.2519 | 35197 | 999.0 | 42619 | 100.0 | 0.0084 |
| 6  | 300.9825 | 31087 | 791.6 | 33772 | 79.2  | 0.0097 |
| 7  | 301.1487 | 30611 | 496.1 | 21165 | 49.7  | 0.0098 |
| 8  | 318.2299 | 33521 | 295.2 | 12596 | 29.6  | 0.0095 |
| 9  | 336.2398 | 33560 | 415.4 | 17723 | 41.6  | 0.0100 |
| 10 | 337.2431 | 30787 | 315.9 | 13475 | 31.6  | 0.0110 |

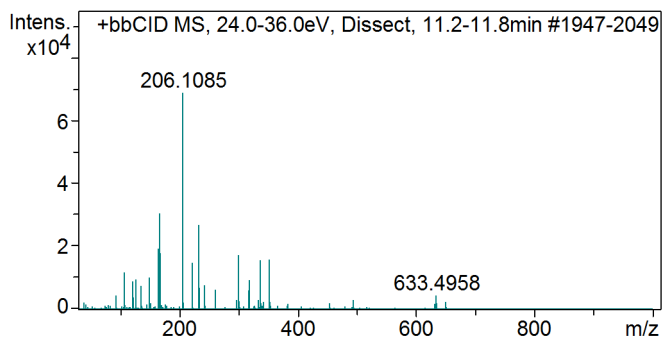

| #  | m/z      | Res.  | S/N   | I     | I %   | FWHM   |
|----|----------|-------|-------|-------|-------|--------|
| 1  | 107.0820 | 21993 | 172.1 | 11846 | 17.2  | 0.0049 |
| 2  | 165.9725 | 27183 | 282.6 | 19454 | 28.3  | 0.0061 |
| 3  | 167.1374 | 27423 | 442.1 | 30437 | 44.2  | 0.0061 |
| 4  | 169.1167 | 27376 | 259.6 | 17869 | 26.0  | 0.0062 |
| 5  | 206.1085 | 29394 | 999.6 | 68816 | 100.0 | 0.0070 |
| 6  | 223.1044 | 28204 | 216.6 | 14911 | 21.7  | 0.0079 |
| 7  | 233.2187 | 30451 | 389.0 | 26783 | 38.9  | 0.0077 |
| 8  | 300.9824 | 31395 | 251.0 | 17279 | 25.1  | 0.0096 |
| 9  | 337.2431 | 31631 | 226.9 | 15620 | 22.7  | 0.0107 |
| 10 | 352.2132 | 31795 | 231.7 | 15950 | 23.2  | 0.0111 |

# Compound Spectrum List Report

## Cmpd 92, Dissect, 11.5 min

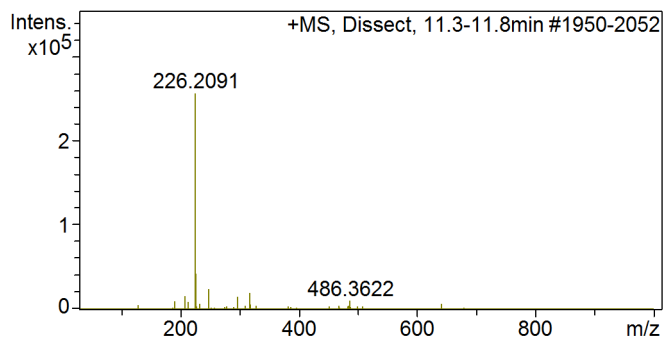

| #  | m/z      | Res.  | S/N   | I      | I %   | FWHM   |
|----|----------|-------|-------|--------|-------|--------|
| 1  | 191.1731 | 28241 | 38.2  | 9802   | 3.8   | 0.0068 |
| 2  | 209.1831 | 28193 | 63.1  | 16215  | 6.3   | 0.0074 |
| 3  | 214.2096 | 28073 | 33.0  | 8479   | 3.3   | 0.0076 |
| 4  | 226.2091 | 31778 | 999.0 | 256581 | 100.0 | 0.0071 |
| 5  | 227.2124 | 29378 | 166.1 | 42651  | 16.6  | 0.0077 |
| 6  | 248.1904 | 29175 | 94.6  | 24302  | 9.5   | 0.0085 |
| 7  | 248.2502 | 29071 | 31.9  | 8201   | 3.2   | 0.0085 |
| 8  | 297.2520 | 34721 | 59.7  | 15338  | 6.0   | 0.0086 |
| 9  | 318.2299 | 33177 | 77.0  | 19789  | 7.7   | 0.0096 |
| 10 | 486.3622 | 31146 | 38.8  | 9960   | 3.9   | 0.0156 |

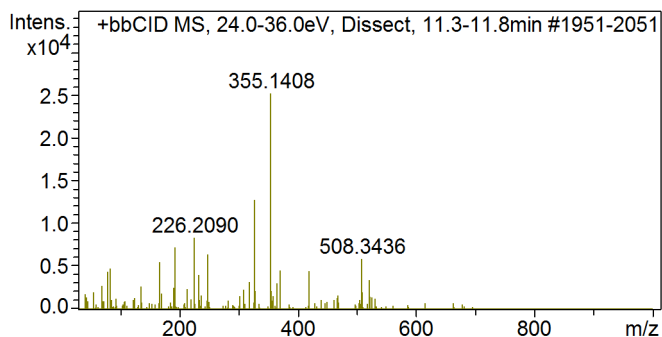

| #  | m/z      | Res.  | S/N   | I     | I %   | FWHM   |
|----|----------|-------|-------|-------|-------|--------|
| 1  | 83.0826  | 19949 | 191.5 | 4831  | 19.2  | 0.0042 |
| 2  | 167.1374 | 27435 | 218.6 | 5514  | 21.9  | 0.0061 |
| 3  | 194.1088 | 27995 | 289.2 | 7294  | 28.9  | 0.0069 |
| 4  | 226.2090 | 29589 | 332.6 | 8389  | 33.3  | 0.0076 |
| 5  | 248.1904 | 28312 | 256.1 | 6460  | 25.6  | 0.0088 |
| 6  | 327.2172 | 32070 | 507.6 | 12804 | 50.8  | 0.0102 |
| 7  | 355.1408 | 31690 | 999.5 | 25212 | 100.0 | 0.0112 |
| 8  | 371.1141 | 30541 | 182.0 | 4590  | 18.2  | 0.0122 |
| 9  | 418.9798 | 32368 | 179.7 | 4532  | 18.0  | 0.0129 |
| 10 | 508.3436 | 30676 | 234.9 | 5925  | 23.5  | 0.0166 |

## Cmpd 93, Dissect, 11.6 min

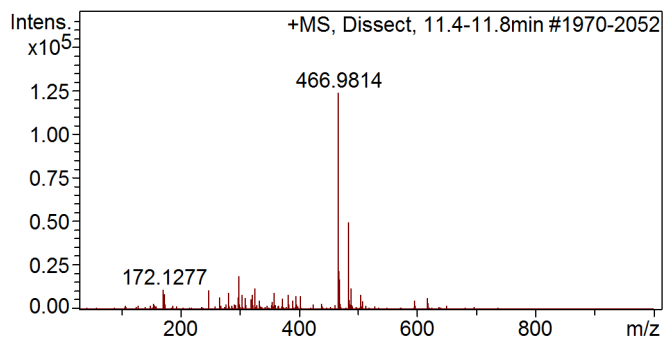

| #  | m/z      | Res.  | S/N   | I      | I %   | FWHM   |
|----|----------|-------|-------|--------|-------|--------|
| 1  | 172.1277 | 27048 | 91.7  | 11359  | 9.2   | 0.0064 |
| 2  | 248.1905 | 30093 | 88.5  | 10954  | 8.8   | 0.0082 |
| 3  | 299.2676 | 30620 | 155.2 | 19212  | 15.5  | 0.0098 |
| 4  | 326.3674 | 32481 | 98.9  | 12248  | 9.9   | 0.0100 |
| 5  | 359.2437 | 31152 | 77.7  | 9619   | 7.8   | 0.0115 |
| 6  | 466.9814 | 34362 | 999.9 | 123791 | 100.0 | 0.0136 |
| 7  | 467.9842 | 31169 | 179.2 | 22187  | 17.9  | 0.0150 |
| 8  | 468.9779 | 28595 | 139.8 | 17312  | 14.0  | 0.0164 |
| 9  | 484.0075 | 32676 | 403.2 | 49915  | 40.3  | 0.0148 |
| 10 | 488.9628 | 30704 | 98.4  | 12179  | 9.8   | 0.0159 |

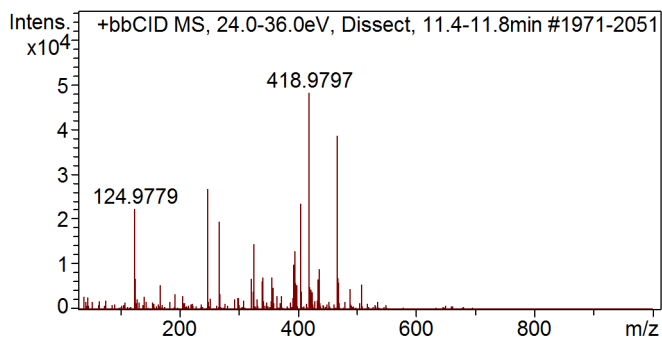

| #  | m/z      | Res.  | S/N   | I     | I %   | FWHM   |
|----|----------|-------|-------|-------|-------|--------|
| 1  | 124.9779 | 24493 | 463.7 | 22351 | 46.4  | 0.0051 |
| 2  | 248.9722 | 29871 | 555.0 | 26750 | 55.5  | 0.0083 |
| 3  | 268.0314 | 30863 | 404.4 | 19491 | 40.5  | 0.0087 |
| 4  | 326.3674 | 33553 | 300.9 | 14501 | 30.1  | 0.0097 |
| 5  | 393.2479 | 31819 | 195.9 | 9443  | 19.6  | 0.0124 |
| 6  | 393.3024 | 31177 | 208.6 | 10055 | 20.9  | 0.0126 |
| 7  | 395.2635 | 30249 | 269.2 | 12975 | 26.9  | 0.0131 |
| 8  | 404.9646 | 32219 | 488.3 | 23534 | 48.9  | 0.0126 |
| 9  | 418.9797 | 32364 | 999.4 | 48169 | 100.0 | 0.0129 |
| 10 | 466.9815 | 32699 | 801.2 | 38616 | 80.2  | 0.0143 |

# Compound Spectrum List Report

## Cmpd 94, Dissect, 11.6 min

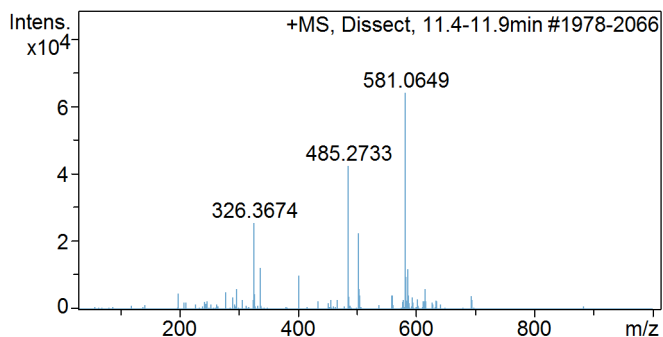

| #  | m/z      | Res.  | S/N   | I     | I %   | FWHM   |
|----|----------|-------|-------|-------|-------|--------|
| 1  | 326.3674 | 32651 | 400.1 | 25645 | 40.1  | 0.0100 |
| 2  | 337.1325 | 29854 | 192.8 | 12355 | 19.3  | 0.0113 |
| 3  | 402.1422 | 31220 | 158.4 | 10152 | 15.9  | 0.0129 |
| 4  | 485.0099 | 29891 | 136.1 | 8721  | 13.6  | 0.0162 |
| 5  | 485.2733 | 31788 | 661.6 | 42407 | 66.3  | 0.0153 |
| 6  | 502.2991 | 31785 | 352.9 | 22620 | 35.3  | 0.0158 |
| 7  | 581.0649 | 32501 | 998.6 | 64002 | 100.0 | 0.0179 |
| 8  | 582.0677 | 32169 | 326.9 | 20951 | 32.7  | 0.0181 |
| 9  | 583.0630 | 26645 | 152.7 | 9789  | 15.3  | 0.0219 |
| 10 | 586.0200 | 31118 | 186.9 | 11979 | 18.7  | 0.0188 |

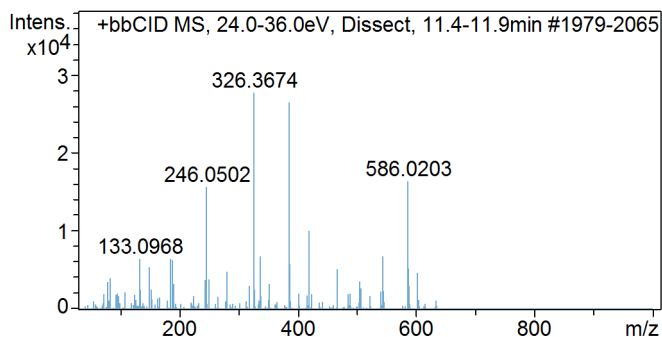

| #  | m/z      | Res.  | S/N   | I     | I %   | FWHM   |
|----|----------|-------|-------|-------|-------|--------|
| 1  | 133.0968 | 24203 | 234.5 | 6501  | 23.4  | 0.0055 |
| 2  | 186.2153 | 28154 | 233.0 | 6462  | 23.3  | 0.0066 |
| 3  | 189.1059 | 26666 | 228.0 | 6321  | 22.8  | 0.0071 |
| 4  | 246.0502 | 29057 | 565.1 | 15672 | 56.5  | 0.0085 |
| 5  | 326.3674 | 33663 | 999.9 | 27728 | 100.0 | 0.0097 |
| 6  | 337.1323 | 31700 | 247.3 | 6858  | 24.7  | 0.0106 |
| 7  | 386.0388 | 31850 | 955.5 | 26496 | 95.6  | 0.0121 |
| 8  | 418.9796 | 32207 | 363.1 | 10068 | 36.3  | 0.0130 |
| 9  | 544.0327 | 32129 | 245.4 | 6805  | 24.5  | 0.0169 |
| 10 | 586.0203 | 30343 | 591.5 | 16404 | 59.2  | 0.0193 |

## Cmpd 95, Dissect, 11.7 min

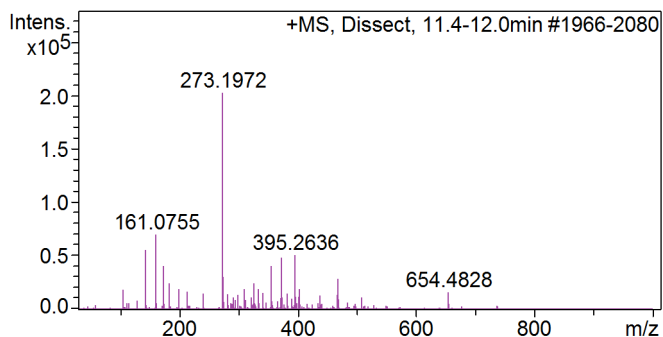

| #  | m/z      | Res.  | S/N   | I      | I %   | FWHM   |
|----|----------|-------|-------|--------|-------|--------|
| 1  | 143.0656 | 25232 | 275.7 | 55797  | 27.6  | 0.0057 |
| 2  | 161.0755 | 26992 | 345.8 | 69976  | 34.6  | 0.0060 |
| 3  | 174.1220 | 27557 | 200.9 | 40658  | 20.1  | 0.0063 |
| 4  | 273.1972 | 32166 | 999.7 | 202332 | 100.0 | 0.0085 |
| 5  | 274.2006 | 30983 | 151.8 | 30715  | 15.2  | 0.0088 |
| 6  | 326.3674 | 32481 | 121.4 | 24570  | 12.1  | 0.0100 |
| 7  | 355.2727 | 32084 | 201.5 | 40774  | 20.2  | 0.0111 |
| 8  | 373.2825 | 31957 | 240.1 | 48590  | 24.0  | 0.0117 |
| 9  | 395.2636 | 31631 | 252.2 | 51032  | 25.2  | 0.0125 |
| 10 | 468.3525 | 31681 | 142.7 | 28888  | 14.3  | 0.0148 |

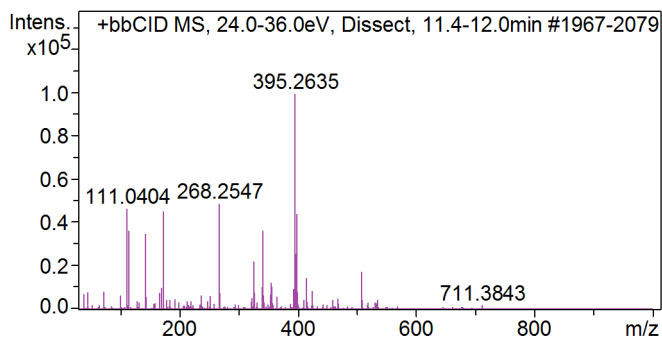

| #  | m/z      | Res.  | S/N   | I     | I %   | FWHM   |
|----|----------|-------|-------|-------|-------|--------|
| 1  | 111.0404 | 22117 | 467.5 | 46417 | 46.8  | 0.0050 |
| 2  | 115.0716 | 22520 | 365.2 | 36263 | 36.5  | 0.0051 |
| 3  | 143.0656 | 25073 | 351.2 | 34868 | 35.1  | 0.0057 |
| 4  | 174.1219 | 27434 | 453.3 | 45004 | 45.3  | 0.0063 |
| 5  | 268.2547 | 32041 | 491.5 | 48799 | 49.2  | 0.0084 |
| 6  | 326.3674 | 33464 | 223.5 | 22190 | 22.4  | 0.0098 |
| 7  | 341.2323 | 32943 | 364.8 | 36218 | 36.5  | 0.0104 |
| 8  | 395.2635 | 32798 | 999.6 | 99248 | 100.0 | 0.0121 |
| 9  | 396.2669 | 31727 | 258.8 | 25700 | 25.9  | 0.0125 |
| 10 | 399.1652 | 31537 | 443.6 | 44042 | 44.4  | 0.0127 |



# Compound Spectrum List Report

## Cmpd 96, Dissect, 11.9 min

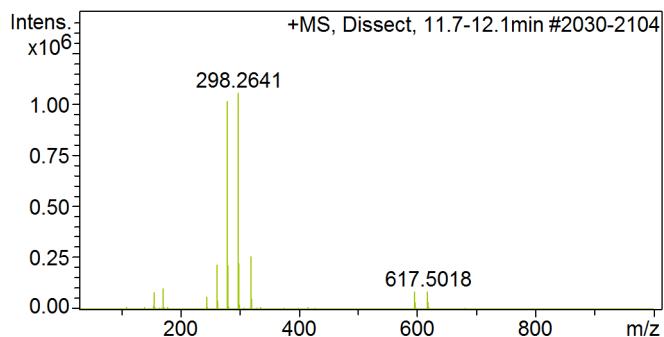

| #  | m/z      | Res.  | S/N   | I       | I %   | FWHM   |
|----|----------|-------|-------|---------|-------|--------|
| 1  | 172.1275 | 27894 | 96.8  | 103479  | 9.8   | 0.0062 |
| 2  | 263.2283 | 33306 | 204.3 | 218335  | 20.7  | 0.0079 |
| 3  | 280.2541 | 37161 | 950.8 | 1016296 | 96.3  | 0.0075 |
| 4  | 281.2382 | 32975 | 123.6 | 132112  | 12.5  | 0.0085 |
| 5  | 281.2576 | 33047 | 203.5 | 217489  | 20.6  | 0.0085 |
| 6  | 298.2641 | 37982 | 987.2 | 1055183 | 100.0 | 0.0079 |
| 7  | 299.2676 | 33819 | 210.9 | 225399  | 21.4  | 0.0088 |
| 8  | 320.2455 | 36101 | 243.4 | 260113  | 24.7  | 0.0089 |
| 9  | 595.5206 | 33386 | 81.7  | 87358   | 8.3   | 0.0178 |
| 10 | 617.5018 | 33707 | 81.9  | 87520   | 8.3   | 0.0183 |

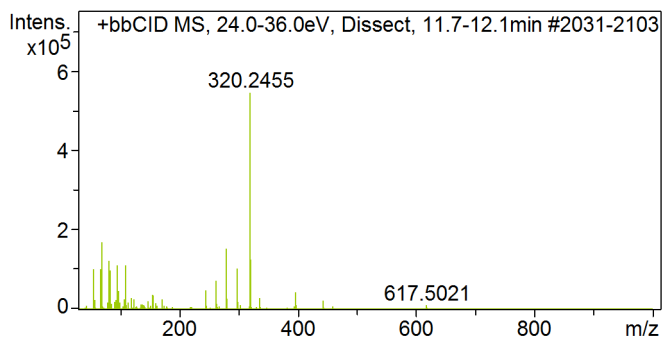

| #  | m/z      | Res.  | S/N   | I      | I %   | FWHM   |
|----|----------|-------|-------|--------|-------|--------|
| 1  | 55.0520  | 17717 | 186.6 | 101728 | 18.7  | 0.0031 |
| 2  | 67.0518  | 18437 | 185.8 | 101319 | 18.6  | 0.0036 |
| 3  | 69.0673  | 18880 | 309.7 | 168851 | 31.0  | 0.0037 |
| 4  | 81.0670  | 20023 | 225.9 | 123199 | 22.6  | 0.0040 |
| 5  | 95.0824  | 20968 | 204.8 | 111692 | 20.5  | 0.0045 |
| 6  | 109.0976 | 22213 | 205.5 | 112059 | 20.6  | 0.0049 |
| 7  | 280.2544 | 33156 | 281.7 | 153604 | 28.2  | 0.0085 |
| 8  | 298.2645 | 32286 | 190.6 | 103927 | 19.1  | 0.0092 |
| 9  | 320.2455 | 37371 | 999.5 | 544971 | 100.0 | 0.0086 |
| 10 | 321.2489 | 34084 | 232.3 | 126673 | 23.2  | 0.0094 |

## Cmpd 97, Dissect, 12.0 min

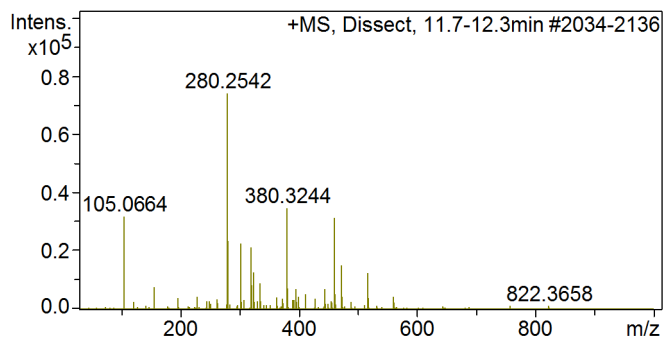

| #  | m/z      | Res.  | S/N   | I     | I %   | FWHM   |
|----|----------|-------|-------|-------|-------|--------|
| 1  | 105.0664 | 21593 | 427.0 | 31753 | 42.9  | 0.0049 |
| 2  | 280.2542 | 36497 | 995.6 | 74037 | 100.0 | 0.0077 |
| 3  | 281.2577 | 32489 | 315.6 | 23466 | 31.7  | 0.0087 |
| 4  | 303.1644 | 31432 | 303.3 | 22555 | 30.5  | 0.0096 |
| 5  | 320.1905 | 35102 | 286.6 | 21314 | 28.8  | 0.0091 |
| 6  | 320.2457 | 35193 | 192.7 | 14328 | 19.4  | 0.0091 |
| 7  | 324.2792 | 32342 | 173.1 | 12871 | 17.4  | 0.0100 |
| 8  | 380.3244 | 31919 | 465.7 | 34628 | 46.8  | 0.0119 |
| 9  | 460.2784 | 31031 | 423.1 | 31464 | 42.5  | 0.0148 |
| 10 | 472.3111 | 30202 | 204.7 | 15221 | 20.6  | 0.0156 |

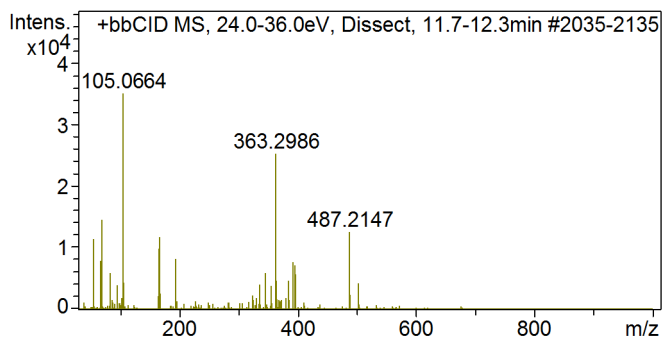

| #  | m/z      | Res.  | S/N   | I     | I %   | FWHM   |
|----|----------|-------|-------|-------|-------|--------|
| 1  | 55.0520  | 17592 | 325.8 | 11444 | 32.6  | 0.0031 |
| 2  | 67.0518  | 18307 | 226.5 | 7953  | 22.7  | 0.0037 |
| 3  | 69.0673  | 18740 | 415.4 | 14590 | 41.6  | 0.0037 |
| 4  | 105.0664 | 21401 | 999.6 | 35108 | 100.0 | 0.0049 |
| 5  | 167.1010 | 27915 | 281.9 | 9901  | 28.2  | 0.0060 |
| 6  | 167.1374 | 26982 | 334.8 | 11760 | 33.5  | 0.0062 |
| 7  | 195.1161 | 27322 | 234.6 | 8241  | 23.5  | 0.0071 |
| 8  | 363.2986 | 32005 | 717.5 | 25200 | 71.8  | 0.0114 |
| 9  | 392.3003 | 32331 | 221.2 | 7770  | 22.1  | 0.0121 |
| 10 | 487.2147 | 31504 | 359.9 | 12639 | 36.0  | 0.0155 |

# Compound Spectrum List Report

## Cmpd 98, Dissect, 12.1 min

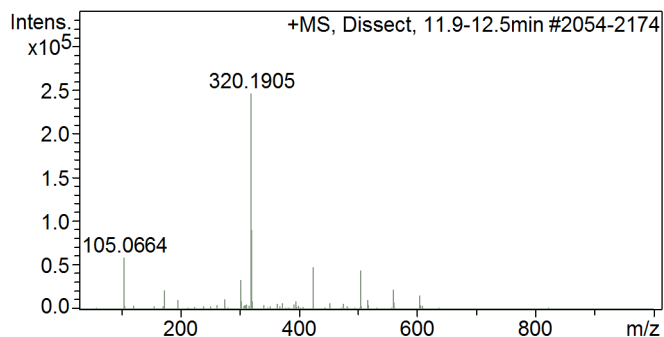

| #  | m/z      | Res.  | S/N   | I      | I %   | FWHM   |
|----|----------|-------|-------|--------|-------|--------|
| 1  | 105.0664 | 21637 | 240.8 | 59456  | 24.1  | 0.0049 |
| 2  | 174.1067 | 27637 | 91.2  | 22523  | 9.1   | 0.0063 |
| 3  | 303.1645 | 31462 | 138.3 | 34161  | 13.9  | 0.0096 |
| 4  | 320.1905 | 35199 | 997.6 | 246346 | 100.0 | 0.0091 |
| 5  | 320.2459 | 33625 | 202.5 | 49993  | 20.3  | 0.0095 |
| 6  | 321.1940 | 32961 | 366.0 | 90388  | 36.7  | 0.0097 |
| 7  | 424.3491 | 32534 | 194.7 | 48087  | 19.5  | 0.0130 |
| 8  | 504.3034 | 31813 | 182.2 | 44994  | 18.3  | 0.0159 |
| 9  | 560.3606 | 31846 | 94.1  | 23231  | 9.4   | 0.0176 |
| 10 | 604.3854 | 30997 | 65.5  | 16178  | 6.6   | 0.0195 |

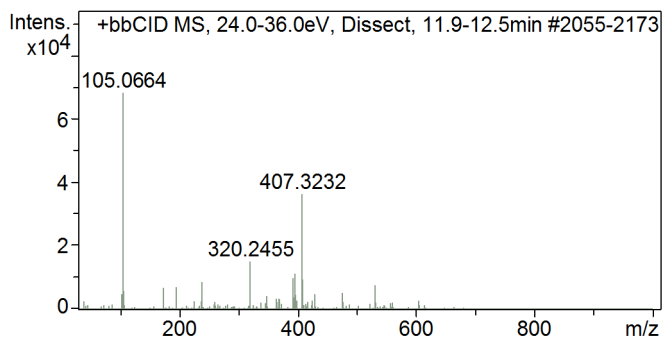

| #  | m/z      | Res.  | S/N   | I     | I %   | FWHM   |
|----|----------|-------|-------|-------|-------|--------|
| 1  | 105.0664 | 21523 | 999.7 | 68231 | 100.0 | 0.0049 |
| 2  | 174.1068 | 26659 | 100.2 | 6842  | 10.0  | 0.0065 |
| 3  | 196.0881 | 27926 | 103.7 | 7081  | 10.4  | 0.0070 |
| 4  | 239.1411 | 27987 | 128.1 | 8742  | 12.8  | 0.0085 |
| 5  | 320.2455 | 34553 | 223.8 | 15277 | 22.4  | 0.0093 |
| 6  | 392.3004 | 31593 | 146.8 | 10018 | 14.7  | 0.0124 |
| 7  | 395.2636 | 32826 | 167.1 | 11403 | 16.7  | 0.0120 |
| 8  | 407.3232 | 33150 | 531.8 | 36295 | 53.2  | 0.0123 |
| 9  | 408.3265 | 32376 | 139.7 | 9534  | 14.0  | 0.0126 |
| 10 | 531.2397 | 31834 | 113.5 | 7744  | 11.3  | 0.0167 |

## Cmpd 99, Dissect, 12.1 min

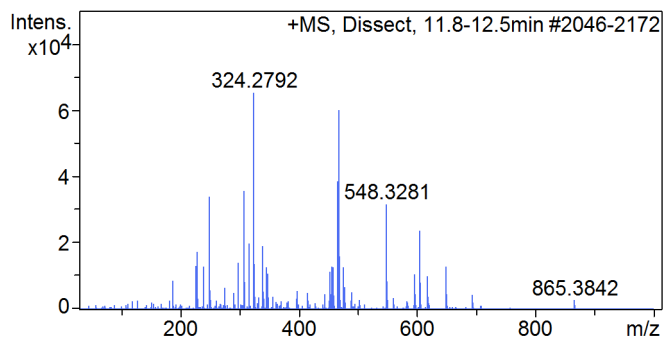

| #  | m/z      | Res.  | S/N   | I     | I %   | FWHM   |
|----|----------|-------|-------|-------|-------|--------|
| 1  | 250.2060 | 29754 | 518.6 | 33857 | 51.9  | 0.0084 |
| 2  | 308.2848 | 31729 | 546.5 | 35679 | 54.7  | 0.0097 |
| 3  | 316.2743 | 32247 | 305.8 | 19962 | 30.6  | 0.0098 |
| 4  | 324.2792 | 33607 | 999.6 | 65260 | 100.0 | 0.0096 |
| 5  | 339.1465 | 29935 | 278.3 | 18170 | 27.8  | 0.0113 |
| 6  | 339.2587 | 27273 | 291.9 | 19055 | 29.2  | 0.0124 |
| 7  | 466.1461 | 31337 | 590.3 | 38536 | 59.0  | 0.0149 |
| 8  | 468.3735 | 32657 | 917.9 | 59925 | 91.8  | 0.0143 |
| 9  | 548.3281 | 30645 | 483.4 | 31559 | 48.4  | 0.0179 |
| 10 | 604.3853 | 30735 | 362.3 | 23656 | 36.2  | 0.0197 |

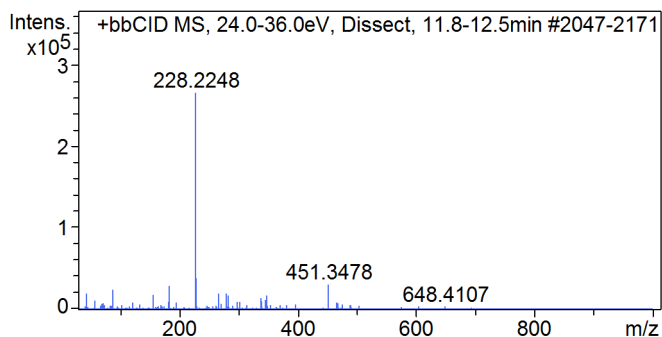

| #  | m/z      | Res.  | S/N   | I      | I %   | FWHM   |
|----|----------|-------|-------|--------|-------|--------|
| 1  | 43.0161  | 15470 | 74.9  | 19946  | 7.5   | 0.0028 |
| 2  | 43.0524  | 15304 | 73.1  | 19468  | 7.3   | 0.0028 |
| 3  | 88.0726  | 19613 | 91.6  | 24370  | 9.2   | 0.0045 |
| 4  | 156.0968 | 26032 | 68.6  | 18254  | 6.9   | 0.0060 |
| 5  | 184.0933 | 27051 | 110.0 | 29289  | 11.0  | 0.0068 |
| 6  | 228.2248 | 30617 | 998.1 | 265631 | 100.0 | 0.0075 |
| 7  | 229.2283 | 27516 | 146.6 | 39016  | 14.7  | 0.0083 |
| 8  | 267.1770 | 30350 | 74.9  | 19946  | 7.5   | 0.0088 |
| 9  | 280.2545 | 32763 | 76.0  | 20227  | 7.6   | 0.0086 |
| 10 | 451.3478 | 31388 | 114.8 | 30548  | 11.5  | 0.0144 |

# Compound Spectrum List Report

## Cmpd 100, Dissect, 12.2 min

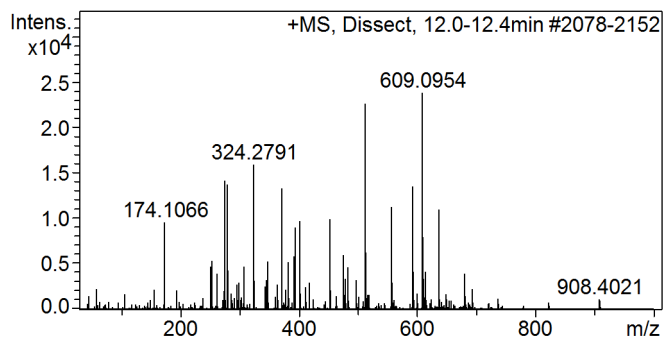

| #  | m/z      | Res.  | S/N    | I     | I %   | FWHM   |
|----|----------|-------|--------|-------|-------|--------|
| 1  | 276.2230 | 30315 | 593.7  | 14138 | 59.4  | 0.0091 |
| 2  | 280.2544 | 32624 | 575.0  | 13693 | 57.5  | 0.0086 |
| 3  | 324.2791 | 33284 | 668.3  | 15914 | 66.8  | 0.0097 |
| 4  | 372.3349 | 31217 | 558.6  | 13303 | 55.9  | 0.0119 |
| 5  | 453.3533 | 32812 | 416.7  | 9923  | 41.7  | 0.0138 |
| 6  | 512.3981 | 31085 | 947.5  | 22563 | 94.8  | 0.0165 |
| 7  | 556.4228 | 30975 | 472.8  | 11259 | 47.3  | 0.0180 |
| 8  | 592.3525 | 31445 | 568.3  | 13533 | 56.8  | 0.0188 |
| 9  | 609.0954 | 32033 | 1000.0 | 23813 | 100.0 | 0.0190 |
| 10 | 636.3775 | 31571 | 460.6  | 10967 | 46.1  | 0.0202 |

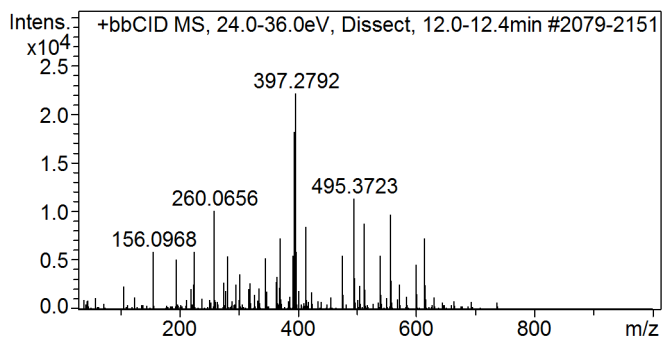

| #  | m/z      | Res.  | S/N   | I     | I %   | FWHM   |
|----|----------|-------|-------|-------|-------|--------|
| 1  | 260.0656 | 30824 | 455.1 | 10098 | 45.5  | 0.0084 |
| 2  | 371.1504 | 31380 | 329.0 | 7300  | 32.9  | 0.0118 |
| 3  | 394.3160 | 31239 | 818.2 | 18153 | 81.9  | 0.0126 |
| 4  | 397.2792 | 31776 | 999.3 | 22171 | 100.0 | 0.0125 |
| 5  | 398.2824 | 30729 | 268.4 | 5955  | 26.9  | 0.0130 |
| 6  | 414.0688 | 31755 | 383.1 | 8500  | 38.3  | 0.0130 |
| 7  | 495.3723 | 31894 | 512.4 | 11369 | 51.3  | 0.0155 |
| 8  | 512.3984 | 31393 | 396.0 | 8787  | 39.6  | 0.0163 |
| 9  | 556.4230 | 31053 | 437.6 | 9708  | 43.8  | 0.0179 |
| 10 | 614.0502 | 30305 | 328.6 | 7291  | 32.9  | 0.0203 |

## Cmpd 101, Dissect, 12.3 min

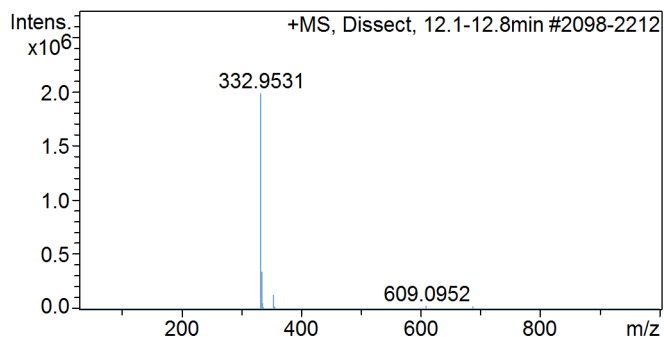

| #  | m/z      | Res.  | S/N   | I       | I %   | FWHM   |
|----|----------|-------|-------|---------|-------|--------|
| 1  | 332.9531 | 40402 | 991.5 | 1983143 | 100.0 | 0.0082 |
| 2  | 333.9559 | 34805 | 172.7 | 345333  | 17.4  | 0.0096 |
| 3  | 334.9493 | 35190 | 175.5 | 350930  | 17.7  | 0.0095 |
| 4  | 335.9518 | 29288 | 28.8  | 57519   | 2.9   | 0.0115 |
| 5  | 336.9454 | 26440 | 11.6  | 23264   | 1.2   | 0.0127 |
| 6  | 354.9345 | 35235 | 67.7  | 135500  | 6.8   | 0.0101 |
| 7  | 355.9370 | 30024 | 11.7  | 23442   | 1.2   | 0.0119 |
| 8  | 356.9302 | 30219 | 11.2  | 22370   | 1.1   | 0.0118 |
| 9  | 609.0952 | 31771 | 15.3  | 30674   | 1.5   | 0.0192 |
| 10 | 686.8804 | 30676 | 13.0  | 26010   | 1.3   | 0.0224 |

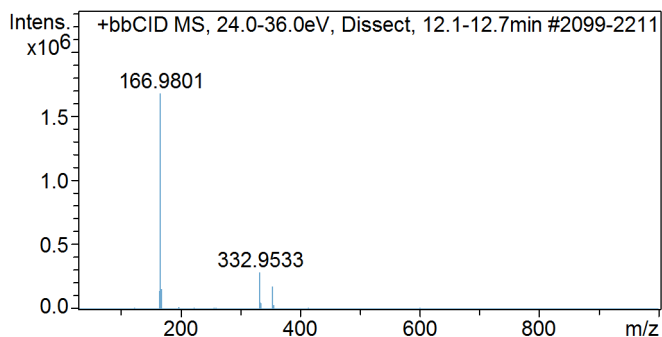

| #  | m/z      | Res.  | S/N   | I       | I %   | FWHM   |
|----|----------|-------|-------|---------|-------|--------|
| 1  | 165.9725 | 28008 | 82.0  | 143954  | 8.6   | 0.0059 |
| 2  | 166.9801 | 30686 | 954.9 | 1676024 | 100.0 | 0.0054 |
| 3  | 167.9831 | 25182 | 80.9  | 142021  | 8.5   | 0.0067 |
| 4  | 168.9760 | 28409 | 92.6  | 162610  | 9.7   | 0.0059 |
| 5  | 332.9533 | 37715 | 165.7 | 290921  | 17.4  | 0.0088 |
| 6  | 333.9559 | 31868 | 29.3  | 51474   | 3.1   | 0.0105 |
| 7  | 334.9493 | 32258 | 27.7  | 48545   | 2.9   | 0.0104 |
| 8  | 354.9346 | 35080 | 102.3 | 179564  | 10.7  | 0.0101 |
| 9  | 355.9371 | 31408 | 19.2  | 33774   | 2.0   | 0.0113 |
| 10 | 356.9306 | 30639 | 18.9  | 33198   | 2.0   | 0.0116 |

# Compound Spectrum List Report

## Cmpd 102, Dissect, 12.4 min

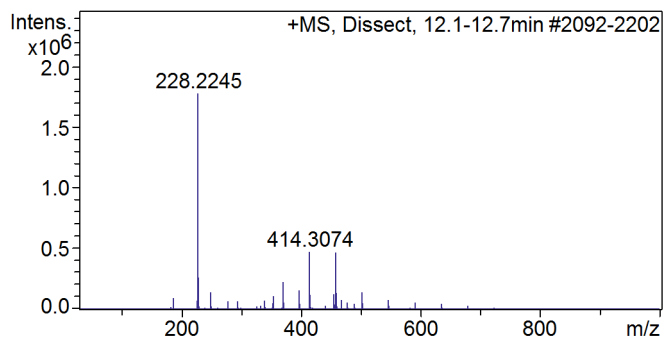

| #  | m/z      | Res.  | S/N   | I       | I %   | FWHM   |
|----|----------|-------|-------|---------|-------|--------|
| 1  | 228.2245 | 34198 | 997.7 | 1777883 | 100.0 | 0.0067 |
| 2  | 229.2279 | 31565 | 149.2 | 265796  | 15.0  | 0.0073 |
| 3  | 250.2058 | 31782 | 81.4  | 145053  | 8.2   | 0.0079 |
| 4  | 370.2829 | 34434 | 127.9 | 227943  | 12.8  | 0.0108 |
| 5  | 397.2815 | 33411 | 90.8  | 161751  | 9.1   | 0.0119 |
| 6  | 414.3074 | 38260 | 266.9 | 475516  | 26.7  | 0.0108 |
| 7  | 455.4415 | 34202 | 73.4  | 130707  | 7.4   | 0.0133 |
| 8  | 458.3321 | 39052 | 264.6 | 471425  | 26.5  | 0.0117 |
| 9  | 459.3355 | 34557 | 77.6  | 138254  | 7.8   | 0.0133 |
| 10 | 502.3569 | 36153 | 81.6  | 145423  | 8.2   | 0.0139 |

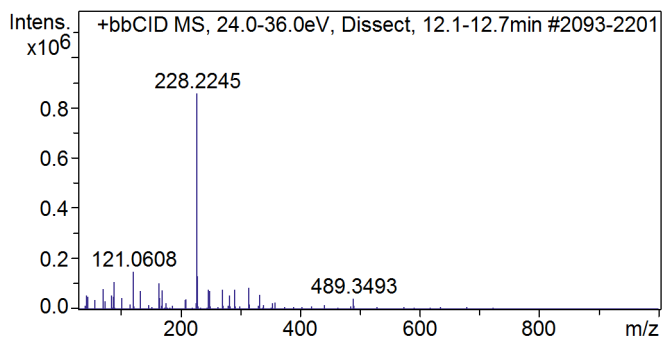

| #  | m/z      | Res.  | S/N   | I      | I %   | FWHM   |
|----|----------|-------|-------|--------|-------|--------|
| 1  | 71.0829  | 19133 | 94.0  | 81038  | 9.4   | 0.0037 |
| 2  | 89.0567  | 20090 | 128.7 | 110947 | 12.9  | 0.0044 |
| 3  | 121.0608 | 23834 | 174.4 | 150384 | 17.5  | 0.0051 |
| 4  | 165.0855 | 27462 | 121.9 | 105124 | 12.3  | 0.0060 |
| 5  | 228.2245 | 33842 | 995.1 | 857884 | 100.0 | 0.0067 |
| 6  | 229.2279 | 30389 | 153.1 | 131977 | 15.4  | 0.0075 |
| 7  | 247.1975 | 31185 | 92.3  | 79537  | 9.3   | 0.0079 |
| 8  | 271.1451 | 32106 | 92.4  | 79635  | 9.3   | 0.0084 |
| 9  | 291.2223 | 31337 | 93.8  | 80896  | 9.4   | 0.0093 |
| 10 | 315.1698 | 33687 | 102.3 | 88222  | 10.3  | 0.0094 |

## Cmpd 103, Dissect, 12.5 min

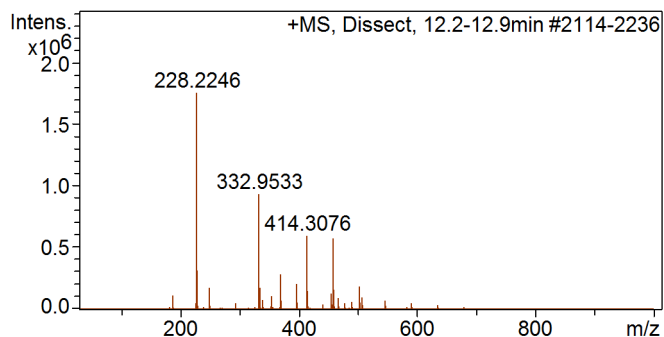

| #  | m/z      | Res.  | S/N   | I       | I %   | FWHM   |
|----|----------|-------|-------|---------|-------|--------|
| 1  | 228.2246 | 33838 | 998.2 | 1754684 | 100.0 | 0.0067 |
| 2  | 229.2280 | 30862 | 179.5 | 315536  | 18.0  | 0.0074 |
| 3  | 250.2059 | 31247 | 101.8 | 178918  | 10.2  | 0.0080 |
| 4  | 332.9533 | 38854 | 532.5 | 936051  | 53.3  | 0.0086 |
| 5  | 334.9493 | 33294 | 101.3 | 178155  | 10.2  | 0.0101 |
| 6  | 370.2831 | 34510 | 163.6 | 287677  | 16.4  | 0.0107 |
| 7  | 397.2817 | 34690 | 120.4 | 211738  | 12.1  | 0.0115 |
| 8  | 414.3076 | 39319 | 339.1 | 596097  | 34.0  | 0.0105 |
| 9  | 458.3323 | 40935 | 328.8 | 577949  | 32.9  | 0.0112 |
| 10 | 502.3571 | 37600 | 105.9 | 186234  | 10.6  | 0.0134 |

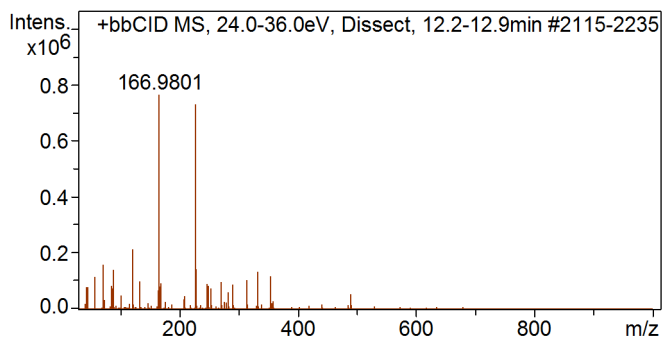

| #  | m/z      | Res.  | S/N   | I      | I %   | FWHM   |
|----|----------|-------|-------|--------|-------|--------|
| 1  | 57.0676  | 17496 | 153.7 | 117970 | 15.4  | 0.0033 |
| 2  | 71.0829  | 19238 | 207.8 | 159532 | 20.8  | 0.0037 |
| 3  | 89.0567  | 20343 | 184.4 | 141597 | 18.5  | 0.0044 |
| 4  | 121.0608 | 23935 | 279.2 | 214365 | 28.0  | 0.0051 |
| 5  | 166.9801 | 29947 | 997.8 | 766020 | 100.0 | 0.0056 |
| 6  | 228.2246 | 33184 | 949.6 | 729000 | 95.2  | 0.0069 |
| 7  | 229.2280 | 29898 | 189.4 | 145420 | 19.0  | 0.0077 |
| 8  | 315.1700 | 34777 | 138.0 | 105945 | 13.8  | 0.0091 |
| 9  | 332.9534 | 35751 | 176.2 | 135255 | 17.7  | 0.0093 |
| 10 | 354.9346 | 34069 | 156.6 | 120192 | 15.7  | 0.0104 |

# Compound Spectrum List Report

## Cmpd 104, Dissect, 12.5 min

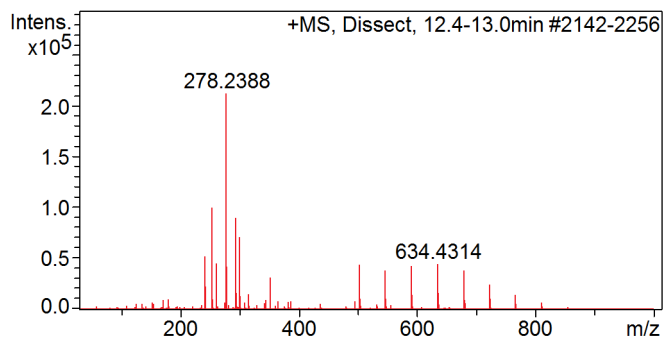

| #  | m/z      | Res.  | S/N   | I      | I %   | FWHM   |
|----|----------|-------|-------|--------|-------|--------|
| 1  | 242.2399 | 32326 | 247.2 | 52513  | 24.8  | 0.0075 |
| 2  | 254.2393 | 33914 | 469.8 | 99815  | 47.0  | 0.0075 |
| 3  | 261.2129 | 30245 | 214.1 | 45479  | 21.4  | 0.0086 |
| 4  | 278.2388 | 32320 | 998.7 | 212169 | 100.0 | 0.0086 |
| 5  | 279.2422 | 30277 | 200.3 | 42549  | 20.1  | 0.0092 |
| 6  | 294.2332 | 31837 | 424.5 | 90177  | 42.5  | 0.0092 |
| 7  | 300.2200 | 32375 | 333.8 | 70921  | 33.4  | 0.0093 |
| 8  | 502.3570 | 37171 | 207.6 | 44107  | 20.8  | 0.0135 |
| 9  | 590.4066 | 33539 | 203.3 | 43196  | 20.4  | 0.0176 |
| 10 | 634.4314 | 32509 | 212.3 | 45101  | 21.3  | 0.0195 |

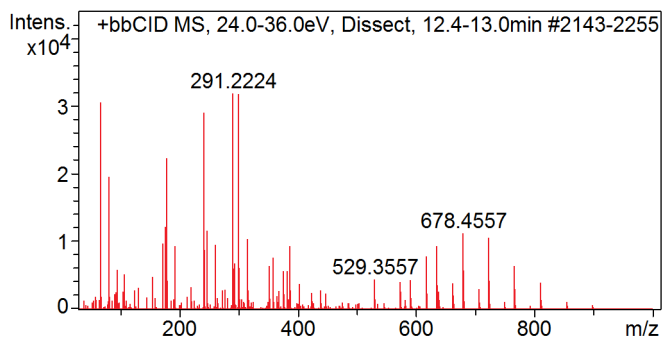

| #  | m/z      | Res.  | S/N   | I     | I %   | FWHM   |
|----|----------|-------|-------|-------|-------|--------|
| 1  | 67.0518  | 18002 | 954.3 | 30455 | 95.4  | 0.0037 |
| 2  | 81.0670  | 19653 | 612.8 | 19555 | 61.3  | 0.0041 |
| 3  | 177.1063 | 28020 | 381.8 | 12183 | 38.2  | 0.0063 |
| 4  | 179.1371 | 27485 | 699.5 | 22323 | 70.0  | 0.0065 |
| 5  | 242.2398 | 32524 | 907.8 | 28970 | 90.8  | 0.0074 |
| 6  | 247.1976 | 31612 | 365.1 | 11653 | 36.5  | 0.0078 |
| 7  | 291.2224 | 32149 | 999.9 | 31908 | 100.0 | 0.0091 |
| 8  | 300.2200 | 31483 | 996.6 | 31805 | 99.7  | 0.0095 |
| 9  | 678.4557 | 30965 | 351.4 | 11213 | 35.1  | 0.0219 |
| 10 | 722.4805 | 30799 | 331.6 | 10582 | 33.2  | 0.0235 |

## Cmpd 105, Dissect, 12.7 min

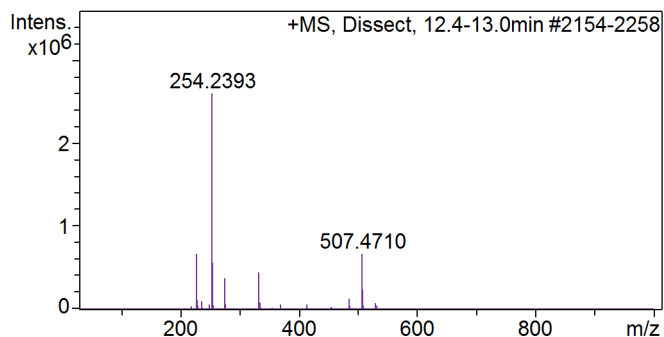

| #  | m/z      | Res.  | S/N   | I       | I %   | FWHM   |
|----|----------|-------|-------|---------|-------|--------|
| 1  | 228.1883 | 29044 | 59.4  | 154943  | 6.0   | 0.0079 |
| 2  | 228.2247 | 29319 | 258.7 | 674473  | 25.9  | 0.0078 |
| 3  | 254.2393 | 34140 | 997.6 | 2601384 | 100.0 | 0.0074 |
| 4  | 255.2427 | 34517 | 216.6 | 564740  | 21.7  | 0.0074 |
| 5  | 276.2206 | 34814 | 146.5 | 382146  | 14.7  | 0.0079 |
| 6  | 332.9532 | 31032 | 173.1 | 451417  | 17.4  | 0.0107 |
| 7  | 333.2887 | 30012 | 67.4  | 175800  | 6.8   | 0.0111 |
| 8  | 485.2731 | 34332 | 52.1  | 135779  | 5.2   | 0.0141 |
| 9  | 507.4710 | 43603 | 257.6 | 671667  | 25.8  | 0.0116 |
| 10 | 508.4742 | 37828 | 92.2  | 240419  | 9.2   | 0.0134 |

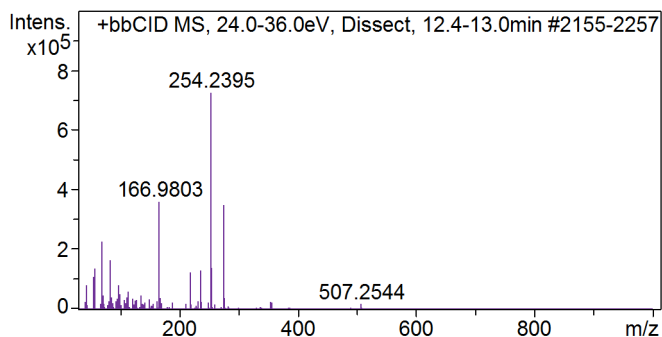

| #  | m/z      | Res.  | S/N   | I      | I %   | FWHM   |
|----|----------|-------|-------|--------|-------|--------|
| 1  | 55.0520  | 17783 | 153.0 | 110851 | 15.3  | 0.0031 |
| 2  | 57.0676  | 17598 | 189.1 | 136960 | 18.9  | 0.0032 |
| 3  | 69.0673  | 19051 | 314.5 | 227795 | 31.5  | 0.0036 |
| 4  | 83.0825  | 20387 | 228.8 | 165706 | 22.9  | 0.0041 |
| 5  | 166.9803 | 27834 | 497.7 | 360498 | 49.8  | 0.0060 |
| 6  | 219.2035 | 30512 | 171.9 | 124537 | 17.2  | 0.0072 |
| 7  | 237.2135 | 31565 | 180.0 | 130408 | 18.0  | 0.0075 |
| 8  | 254.2395 | 34714 | 999.9 | 724257 | 100.0 | 0.0073 |
| 9  | 255.2428 | 31981 | 192.9 | 139730 | 19.3  | 0.0080 |
| 10 | 276.2207 | 33674 | 481.3 | 348606 | 48.1  | 0.0082 |

# Compound Spectrum List Report

## Cmpd 106, Dissect, 12.7 min

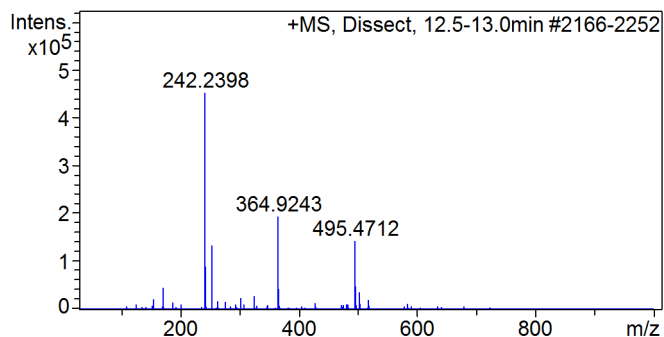

| #  | m/z      | Res.  | S/N   | I      | I %   | FWHM   |
|----|----------|-------|-------|--------|-------|--------|
| 1  | 172.1275 | 27531 | 101.0 | 45817  | 10.1  | 0.0063 |
| 2  | 242.2398 | 33642 | 997.1 | 452306 | 100.0 | 0.0072 |
| 3  | 243.2432 | 29424 | 197.3 | 89505  | 19.8  | 0.0083 |
| 4  | 254.2393 | 34433 | 296.4 | 134451 | 29.7  | 0.0074 |
| 5  | 364.9243 | 35524 | 427.3 | 193846 | 42.9  | 0.0103 |
| 6  | 365.9267 | 30101 | 78.5  | 35618  | 7.9   | 0.0122 |
| 7  | 366.9202 | 30324 | 95.7  | 43418  | 9.6   | 0.0121 |
| 8  | 495.4712 | 33348 | 315.1 | 142923 | 31.6  | 0.0149 |
| 9  | 496.4746 | 31333 | 108.2 | 49065  | 10.8  | 0.0158 |
| 10 | 502.2990 | 33367 | 80.5  | 36523  | 8.1   | 0.0151 |

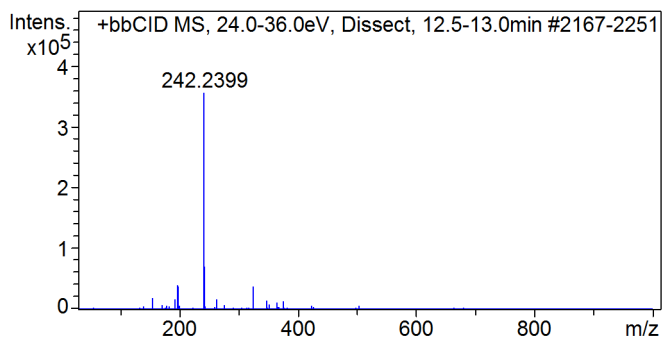

| #  | m/z      | Res.  | S/N   | I      | I %   | FWHM   |
|----|----------|-------|-------|--------|-------|--------|
| 1  | 155.1015 | 25658 | 55.6  | 19852  | 5.6   | 0.0060 |
| 2  | 194.1088 | 27781 | 48.8  | 17409  | 4.9   | 0.0070 |
| 3  | 197.9436 | 28946 | 112.8 | 40289  | 11.3  | 0.0068 |
| 4  | 198.9511 | 27423 | 107.0 | 38219  | 10.7  | 0.0073 |
| 5  | 242.2399 | 33028 | 996.9 | 355992 | 100.0 | 0.0073 |
| 6  | 243.2432 | 29384 | 197.2 | 70431  | 19.8  | 0.0083 |
| 7  | 264.2218 | 27573 | 48.2  | 17203  | 4.8   | 0.0096 |
| 8  | 325.2243 | 32424 | 108.7 | 38802  | 10.9  | 0.0100 |
| 9  | 348.2758 | 31682 | 40.9  | 14608  | 4.1   | 0.0110 |
| 10 | 376.3062 | 32709 | 36.4  | 13012  | 3.7   | 0.0115 |

## Cmpd 107, Dissect, 12.9 min

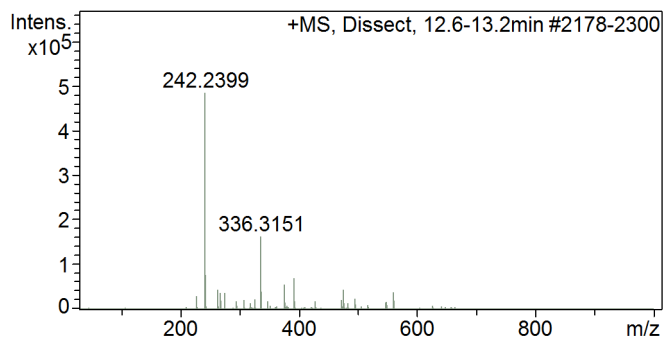

| #  | m/z      | Res.  | S/N   | I      | I %   | FWHM   |
|----|----------|-------|-------|--------|-------|--------|
| 1  | 242.2399 | 33184 | 996.4 | 484798 | 100.0 | 0.0073 |
| 2  | 243.2433 | 29345 | 160.6 | 78158  | 16.1  | 0.0083 |
| 3  | 264.2215 | 28730 | 93.6  | 45561  | 9.4   | 0.0092 |
| 4  | 275.2492 | 30818 | 78.9  | 38391  | 7.9   | 0.0089 |
| 5  | 336.3151 | 32618 | 336.9 | 163910 | 33.8  | 0.0103 |
| 6  | 337.3184 | 30864 | 83.3  | 40513  | 8.4   | 0.0109 |
| 7  | 376.3061 | 32689 | 115.7 | 56279  | 11.6  | 0.0115 |
| 8  | 392.3005 | 33214 | 144.9 | 70504  | 14.5  | 0.0118 |
| 9  | 476.1187 | 31922 | 92.1  | 44809  | 9.2   | 0.0149 |
| 10 | 559.5008 | 41822 | 80.7  | 39267  | 8.1   | 0.0134 |

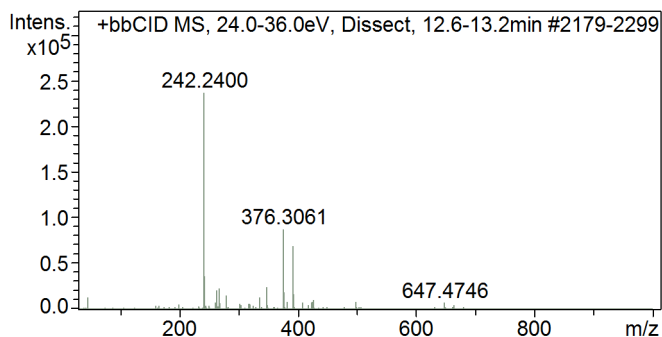

| #  | m/z      | Res.  | S/N   | I      | I %   | FWHM   |
|----|----------|-------|-------|--------|-------|--------|
| 1  | 242.2400 | 31725 | 997.7 | 236451 | 100.0 | 0.0076 |
| 2  | 243.2433 | 29139 | 154.8 | 36687  | 15.5  | 0.0083 |
| 3  | 264.2237 | 27405 | 90.3  | 21404  | 9.1   | 0.0096 |
| 4  | 268.1844 | 28488 | 97.1  | 23021  | 9.7   | 0.0094 |
| 5  | 280.2544 | 32420 | 64.8  | 15349  | 6.5   | 0.0086 |
| 6  | 348.2758 | 31081 | 103.5 | 24533  | 10.4  | 0.0112 |
| 7  | 376.3061 | 33970 | 368.7 | 87372  | 37.0  | 0.0111 |
| 8  | 377.3092 | 30070 | 82.0  | 19442  | 8.2   | 0.0125 |
| 9  | 392.3004 | 33103 | 293.1 | 69454  | 29.4  | 0.0119 |
| 10 | 393.3033 | 29370 | 73.5  | 17427  | 7.4   | 0.0134 |

# Compound Spectrum List Report

## Cmpd 108, Dissect, 12.9 min

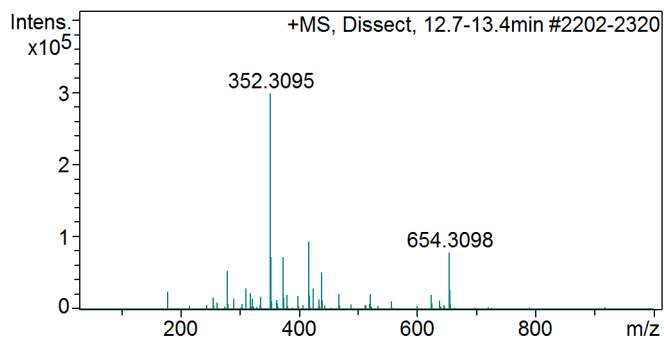

| #  | m/z      | Res.  | S/N   | I      | I %   | FWHM   |
|----|----------|-------|-------|--------|-------|--------|
| 1  | 280.2542 | 34971 | 178.8 | 53483  | 17.9  | 0.0080 |
| 2  | 311.1540 | 31459 | 98.4  | 29439  | 9.9   | 0.0099 |
| 3  | 352.3095 | 35894 | 998.7 | 298649 | 100.0 | 0.0098 |
| 4  | 353.3128 | 32408 | 242.9 | 72624  | 24.3  | 0.0109 |
| 5  | 374.2905 | 33342 | 244.2 | 73036  | 24.5  | 0.0112 |
| 6  | 417.2708 | 33612 | 314.6 | 94072  | 31.5  | 0.0124 |
| 7  | 424.3491 | 31634 | 99.2  | 29677  | 9.9   | 0.0134 |
| 8  | 439.2518 | 32967 | 171.7 | 51349  | 17.2  | 0.0133 |
| 9  | 654.3098 | 32843 | 264.8 | 79176  | 26.5  | 0.0199 |
| 10 | 655.3132 | 31088 | 93.8  | 28044  | 9.4   | 0.0211 |

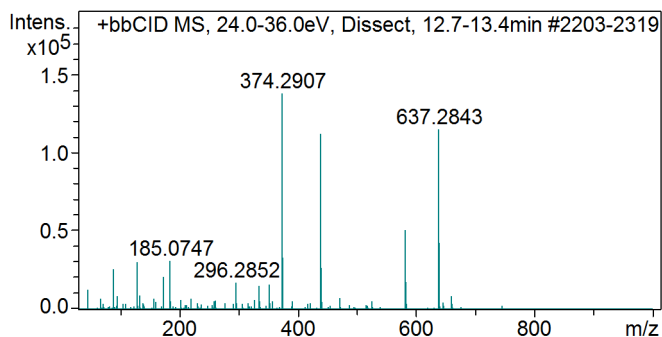

| #  | m/z      | Res.  | S/N   | I      | I %   | FWHM   |
|----|----------|-------|-------|--------|-------|--------|
| 1  | 89.0567  | 19534 | 186.7 | 25799  | 18.7  | 0.0046 |
| 2  | 129.0140 | 24384 | 220.7 | 30493  | 22.1  | 0.0053 |
| 3  | 185.0747 | 28775 | 227.2 | 31388  | 22.7  | 0.0064 |
| 4  | 374.2907 | 35122 | 999.3 | 138070 | 100.0 | 0.0107 |
| 5  | 375.2939 | 32010 | 241.9 | 33428  | 24.2  | 0.0117 |
| 6  | 439.2520 | 35205 | 811.2 | 112082 | 81.2  | 0.0125 |
| 7  | 440.2553 | 31382 | 193.2 | 26699  | 19.3  | 0.0140 |
| 8  | 581.2234 | 32614 | 367.9 | 50837  | 36.8  | 0.0178 |
| 9  | 637.2843 | 34701 | 832.0 | 114949 | 83.3  | 0.0184 |
| 10 | 638.2875 | 31337 | 307.7 | 42516  | 30.8  | 0.0204 |

## Cmpd 109, Dissect, 13.1 min

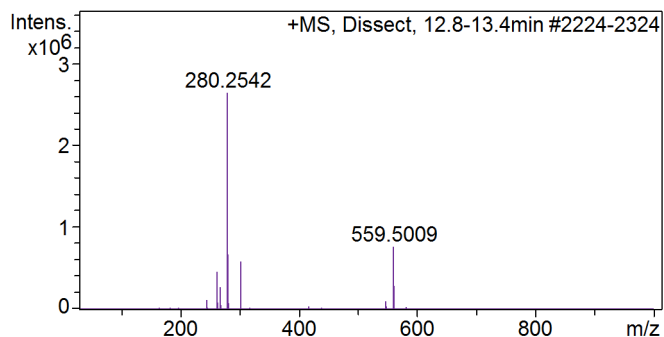

| #  | m/z      | Res.  | S/N   | I       | I %   | FWHM   |
|----|----------|-------|-------|---------|-------|--------|
| 1  | 245.2184 | 30605 | 41.4  | 110119  | 4.2   | 0.0080 |
| 2  | 263.2284 | 34872 | 174.4 | 463881  | 17.5  | 0.0075 |
| 3  | 268.2546 | 35831 | 104.6 | 278198  | 10.5  | 0.0075 |
| 4  | 280.2542 | 35077 | 993.9 | 2643205 | 100.0 | 0.0080 |
| 5  | 281.2577 | 36119 | 253.3 | 673729  | 25.5  | 0.0078 |
| 6  | 302.2355 | 36773 | 220.5 | 586465  | 22.2  | 0.0082 |
| 7  | 303.2390 | 32793 | 42.9  | 113996  | 4.3   | 0.0092 |
| 8  | 547.5010 | 36370 | 36.9  | 98062   | 3.7   | 0.0151 |
| 9  | 559.5009 | 46269 | 288.7 | 767671  | 29.0  | 0.0121 |
| 10 | 560.5041 | 38801 | 109.1 | 290098  | 11.0  | 0.0144 |

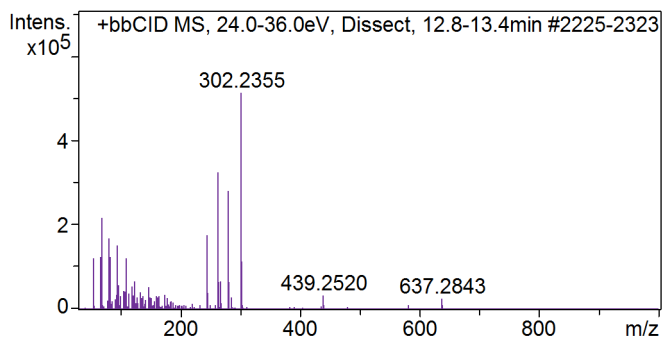

| #  | m/z      | Res.  | S/N   | I      | I %   | FWHM   |
|----|----------|-------|-------|--------|-------|--------|
| 1  | 55.0520  | 17913 | 236.1 | 121654 | 23.7  | 0.0031 |
| 2  | 67.0518  | 18563 | 241.0 | 124142 | 24.2  | 0.0036 |
| 3  | 69.0673  | 19192 | 421.2 | 217014 | 42.3  | 0.0036 |
| 4  | 81.0670  | 20432 | 327.0 | 168453 | 32.8  | 0.0040 |
| 5  | 83.0826  | 20494 | 243.1 | 125232 | 24.4  | 0.0041 |
| 6  | 95.0824  | 21458 | 296.3 | 152629 | 29.7  | 0.0044 |
| 7  | 245.2184 | 31938 | 343.2 | 176801 | 34.5  | 0.0077 |
| 8  | 263.2283 | 34385 | 630.3 | 324730 | 63.3  | 0.0077 |
| 9  | 280.2543 | 34861 | 543.4 | 279968 | 54.6  | 0.0080 |
| 10 | 302.2355 | 35669 | 996.1 | 513186 | 100.0 | 0.0085 |

# Compound Spectrum List Report

## Cmpd 110, Dissect, 13.2 min

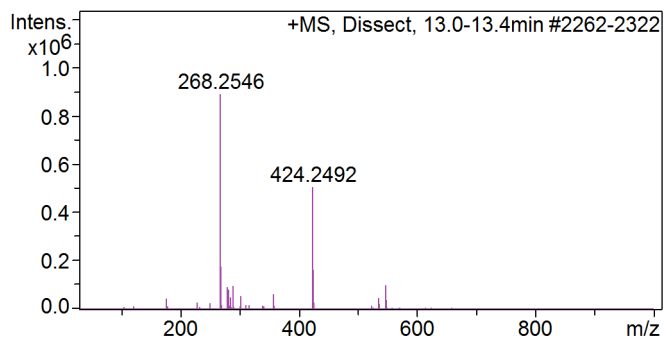

| #  | m/z      | Res.  | S/N   | I      | I %   | FWHM   |
|----|----------|-------|-------|--------|-------|--------|
| 1  | 268.2546 | 36155 | 997.1 | 891385 | 100.0 | 0.0074 |
| 2  | 269.2580 | 32827 | 198.1 | 177111 | 19.9  | 0.0082 |
| 3  | 280.2541 | 36906 | 104.7 | 93638  | 10.5  | 0.0076 |
| 4  | 282.0347 | 31325 | 93.1  | 83242  | 9.3   | 0.0090 |
| 5  | 290.2359 | 32844 | 111.9 | 100075 | 11.2  | 0.0088 |
| 6  | 302.2355 | 33978 | 64.5  | 57706  | 6.5   | 0.0089 |
| 7  | 358.2621 | 32252 | 71.7  | 64062  | 7.2   | 0.0111 |
| 8  | 424.2492 | 39696 | 564.7 | 504787 | 56.6  | 0.0107 |
| 9  | 425.2525 | 35470 | 185.0 | 165356 | 18.6  | 0.0120 |
| 10 | 547.5010 | 35491 | 115.0 | 102816 | 11.5  | 0.0154 |

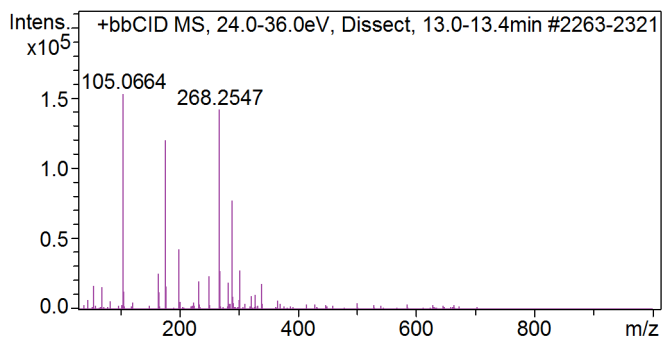

| #  | m/z      | Res.  | S/N   | I      | I %   | FWHM   |
|----|----------|-------|-------|--------|-------|--------|
| 1  | 105.0664 | 21888 | 998.5 | 153033 | 100.0 | 0.0048 |
| 2  | 165.9725 | 27016 | 165.6 | 25381  | 16.6  | 0.0061 |
| 3  | 177.1215 | 28477 | 780.6 | 119627 | 78.2  | 0.0062 |
| 4  | 199.9591 | 28984 | 280.0 | 42916  | 28.0  | 0.0069 |
| 5  | 233.2187 | 29920 | 131.6 | 20171  | 13.2  | 0.0078 |
| 6  | 251.2287 | 30466 | 154.5 | 23674  | 15.5  | 0.0082 |
| 7  | 268.2547 | 33096 | 922.7 | 141420 | 92.4  | 0.0081 |
| 8  | 269.2580 | 30882 | 177.7 | 27238  | 17.8  | 0.0087 |
| 9  | 290.2360 | 33460 | 504.8 | 77362  | 50.6  | 0.0087 |
| 10 | 302.2355 | 32743 | 180.8 | 27710  | 18.1  | 0.0092 |

## Cmpd 111, Dissect, 13.4 min

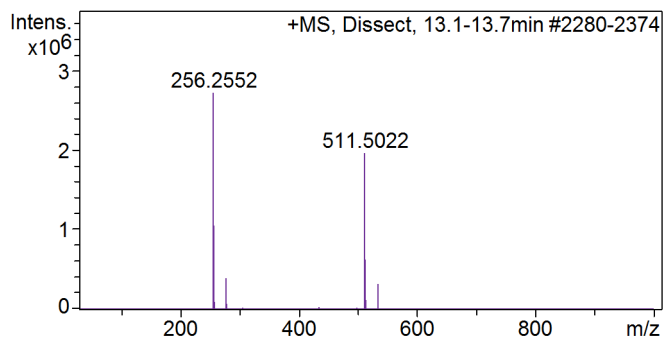

| #  | m/z      | Res.  | S/N   | I       | I %   | FWHM   |
|----|----------|-------|-------|---------|-------|--------|
| 1  | 256.2552 | 21800 | 993.7 | 2722522 | 100.0 | 0.0118 |
| 2  | 257.2583 | 35916 | 384.2 | 1052705 | 38.7  | 0.0072 |
| 3  | 258.2614 | 30310 | 34.3  | 94046   | 3.5   | 0.0085 |
| 4  | 278.2362 | 34997 | 143.8 | 393877  | 14.5  | 0.0080 |
| 5  | 279.2396 | 29695 | 24.3  | 66561   | 2.4   | 0.0094 |
| 6  | 511.5022 | 48588 | 715.6 | 1960440 | 72.0  | 0.0105 |
| 7  | 512.5056 | 43083 | 229.3 | 628320  | 23.1  | 0.0119 |
| 8  | 513.5086 | 33922 | 41.5  | 113820  | 4.2   | 0.0151 |
| 9  | 533.4834 | 40458 | 119.6 | 327668  | 12.0  | 0.0132 |
| 10 | 534.4866 | 33530 | 42.0  | 114972  | 4.2   | 0.0159 |

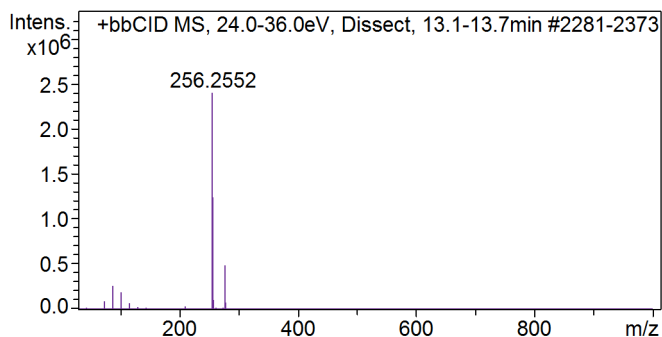

| #  | m/z      | Res.  | S/N   | I       | I %   | FWHM   |
|----|----------|-------|-------|---------|-------|--------|
| 1  | 74.0573  | 19153 | 37.2  | 91375   | 3.8   | 0.0039 |
| 2  | 88.0725  | 21240 | 109.3 | 268398  | 11.2  | 0.0041 |
| 3  | 102.0879 | 21966 | 79.4  | 195161  | 8.1   | 0.0046 |
| 4  | 116.1031 | 22703 | 26.4  | 64918   | 2.7   | 0.0051 |
| 5  | 211.1159 | 30177 | 11.9  | 29338   | 1.2   | 0.0070 |
| 6  | 256.2552 | 19049 | 977.5 | 2401392 | 100.0 | 0.0135 |
| 7  | 257.2582 | 36173 | 506.2 | 1243561 | 51.8  | 0.0071 |
| 8  | 258.2613 | 30548 | 45.7  | 112242  | 4.7   | 0.0085 |
| 9  | 278.2361 | 36062 | 200.4 | 492285  | 20.5  | 0.0077 |
| 10 | 279.2395 | 30834 | 31.5  | 77314   | 3.2   | 0.0091 |



# Compound Spectrum List Report

## Cmpd 112, Dissect, 13.5 min

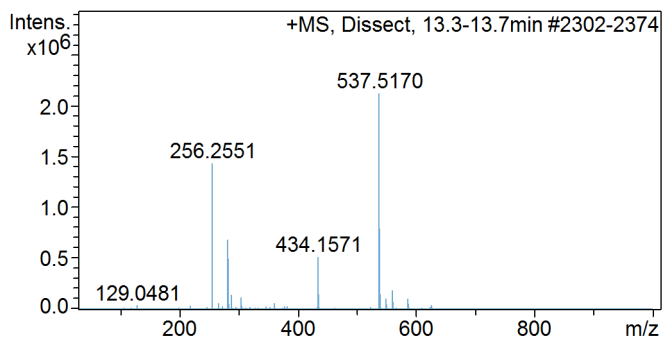

| #  | m/z      | Res.  | S/N   | I       | I %   | FWHM   |
|----|----------|-------|-------|---------|-------|--------|
| 1  | 256.2551 | 25888 | 672.3 | 1429099 | 67.4  | 0.0099 |
| 2  | 282.2700 | 25126 | 322.3 | 684969  | 32.3  | 0.0112 |
| 3  | 283.2730 | 36528 | 233.8 | 496868  | 23.4  | 0.0078 |
| 4  | 288.1653 | 30824 | 68.7  | 145973  | 6.9   | 0.0093 |
| 5  | 434.1571 | 35503 | 243.8 | 518213  | 24.4  | 0.0122 |
| 6  | 435.1600 | 31276 | 70.8  | 150440  | 7.1   | 0.0139 |
| 7  | 537.5170 | 44639 | 997.5 | 2120344 | 100.0 | 0.0120 |
| 8  | 538.5202 | 38128 | 372.0 | 790776  | 37.3  | 0.0141 |
| 9  | 539.5234 | 31125 | 71.4  | 151708  | 7.2   | 0.0173 |
| 10 | 559.4978 | 32095 | 91.2  | 193903  | 9.1   | 0.0174 |

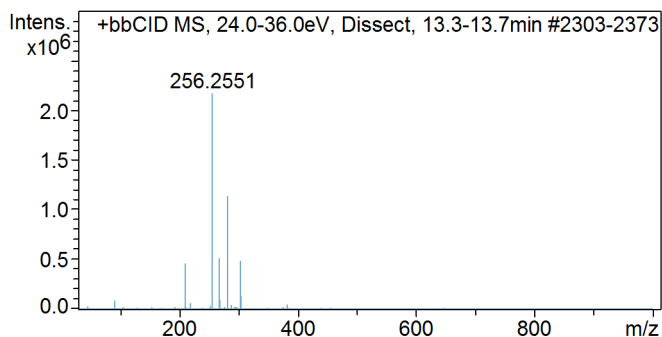

| #  | m/z      | Res.  | S/N   | I       | I %   | FWHM   |
|----|----------|-------|-------|---------|-------|--------|
| 1  | 91.0511  | 20120 | 40.9  | 88894   | 4.1   | 0.0045 |
| 2  | 211.1159 | 30462 | 214.7 | 467253  | 21.5  | 0.0069 |
| 3  | 256.2551 | 23074 | 998.6 | 2172795 | 100.0 | 0.0111 |
| 4  | 268.1844 | 32061 | 238.7 | 519479  | 23.9  | 0.0084 |
| 5  | 268.2546 | 33024 | 237.1 | 515804  | 23.7  | 0.0081 |
| 6  | 269.1878 | 29115 | 48.7  | 105961  | 4.9   | 0.0092 |
| 7  | 269.2579 | 29710 | 43.4  | 94435   | 4.3   | 0.0091 |
| 8  | 282.2698 | 29271 | 524.8 | 1141847 | 52.6  | 0.0096 |
| 9  | 304.2509 | 37431 | 225.9 | 491516  | 22.6  | 0.0081 |
| 10 | 305.2543 | 33743 | 62.5  | 136050  | 6.3   | 0.0090 |

## Cmpd 113, Dissect, 13.6 min

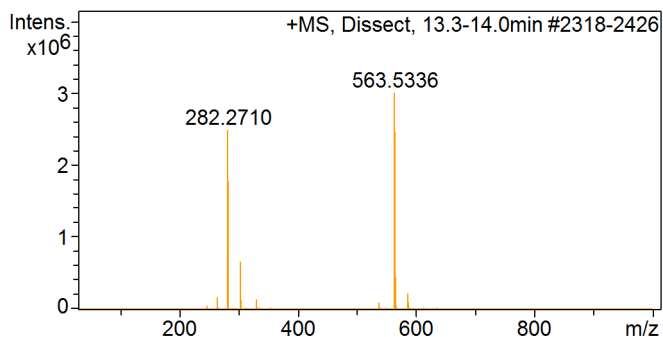

| #  | m/z      | Res.  | S/N   | I       | I %   | FWHM   |
|----|----------|-------|-------|---------|-------|--------|
| 1  | 265.2436 | 32789 | 55.2  | 170274  | 5.7   | 0.0081 |
| 2  | 282.2710 | 15361 | 806.4 | 2485974 | 82.7  | 0.0184 |
| 3  | 283.2728 | 37822 | 577.1 | 1779024 | 59.2  | 0.0075 |
| 4  | 304.2507 | 38230 | 215.8 | 665431  | 22.1  | 0.0080 |
| 5  | 305.2541 | 33220 | 43.1  | 132761  | 4.4   | 0.0092 |
| 6  | 331.2730 | 36824 | 46.6  | 143542  | 4.8   | 0.0090 |
| 7  | 563.5336 | 21538 | 975.1 | 3006015 | 100.0 | 0.0262 |
| 8  | 564.5350 | 48862 | 796.5 | 2455626 | 81.7  | 0.0116 |
| 9  | 565.5381 | 42834 | 148.0 | 456194  | 15.2  | 0.0132 |
| 10 | 585.5127 | 38468 | 74.7  | 230168  | 7.7   | 0.0152 |

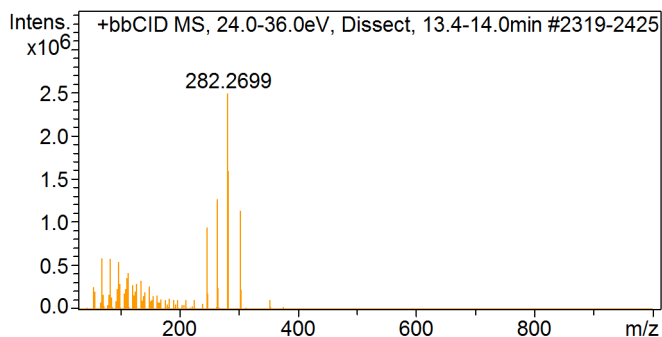

| #  | m/z      | Res.  | S/N   | I       | I %   | FWHM   |
|----|----------|-------|-------|---------|-------|--------|
| 1  | 69.0672  | 19497 | 236.0 | 590068  | 23.7  | 0.0035 |
| 2  | 83.0824  | 21657 | 233.1 | 582772  | 23.4  | 0.0038 |
| 3  | 97.0978  | 22632 | 217.9 | 544808  | 21.8  | 0.0043 |
| 4  | 111.1130 | 23586 | 144.3 | 360852  | 14.5  | 0.0047 |
| 5  | 114.0874 | 23798 | 169.6 | 423985  | 17.0  | 0.0048 |
| 6  | 247.2336 | 36022 | 379.7 | 949378  | 38.1  | 0.0069 |
| 7  | 265.2436 | 36982 | 506.4 | 1266024 | 50.8  | 0.0072 |
| 8  | 282.2699 | 17937 | 997.4 | 2493632 | 100.0 | 0.0157 |
| 9  | 283.2729 | 38204 | 636.8 | 1592028 | 63.8  | 0.0074 |
| 10 | 304.2507 | 39063 | 454.8 | 1136934 | 45.6  | 0.0078 |

# Compound Spectrum List Report

## Cmpd 114, Dissect, 13.7 min

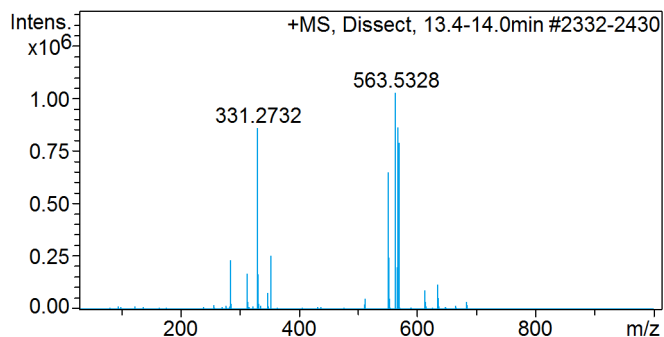

| #  | m/z      | Res.  | S/N   | I       | I %   | FWHM   |
|----|----------|-------|-------|---------|-------|--------|
| 1  | 285.2838 | 24729 | 226.5 | 235153  | 22.9  | 0.0115 |
| 2  | 331.2732 | 36632 | 826.2 | 857619  | 83.5  | 0.0090 |
| 3  | 353.2543 | 34385 | 245.8 | 255196  | 24.9  | 0.0103 |
| 4  | 551.5322 | 38841 | 624.1 | 647841  | 63.1  | 0.0142 |
| 5  | 552.5354 | 33034 | 236.3 | 245268  | 23.9  | 0.0167 |
| 6  | 563.5328 | 25615 | 989.1 | 1026692 | 100.0 | 0.0220 |
| 7  | 567.4157 | 26499 | 205.8 | 213666  | 20.8  | 0.0214 |
| 8  | 567.4589 | 21720 | 351.9 | 365247  | 35.6  | 0.0261 |
| 9  | 567.5468 | 24979 | 828.2 | 859736  | 83.7  | 0.0227 |
| 10 | 569.5397 | 28555 | 758.4 | 787224  | 76.7  | 0.0199 |

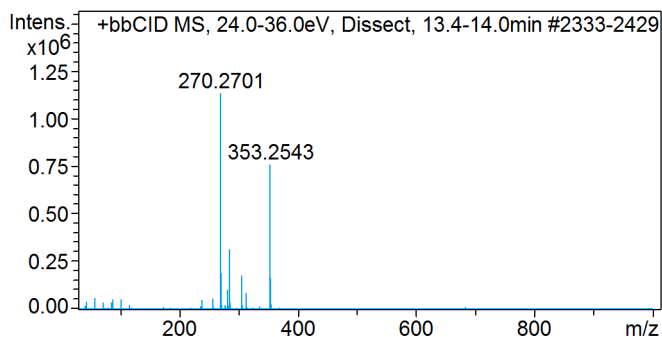

| #  | m/z      | Res.  | S/N   | I       | I %   | FWHM   |
|----|----------|-------|-------|---------|-------|--------|
| 1  | 57.0676  | 17772 | 55.7  | 63581   | 5.6   | 0.0032 |
| 2  | 257.2387 | 29604 | 51.9  | 59277   | 5.2   | 0.0087 |
| 3  | 270.2701 | 36060 | 991.6 | 1132874 | 100.0 | 0.0075 |
| 4  | 271.2734 | 32110 | 168.4 | 192389  | 17.0  | 0.0084 |
| 5  | 282.2698 | 20313 | 90.9  | 103895  | 9.2   | 0.0139 |
| 6  | 285.2852 | 25625 | 277.1 | 316543  | 27.9  | 0.0111 |
| 7  | 306.2579 | 25590 | 157.8 | 180239  | 15.9  | 0.0120 |
| 8  | 313.2631 | 31265 | 78.9  | 90163   | 8.0   | 0.0100 |
| 9  | 353.2543 | 37942 | 662.9 | 757272  | 66.8  | 0.0093 |
| 10 | 354.2577 | 32264 | 146.5 | 167335  | 14.8  | 0.0110 |

## Cmpd 115, Dissect, 13.8 min

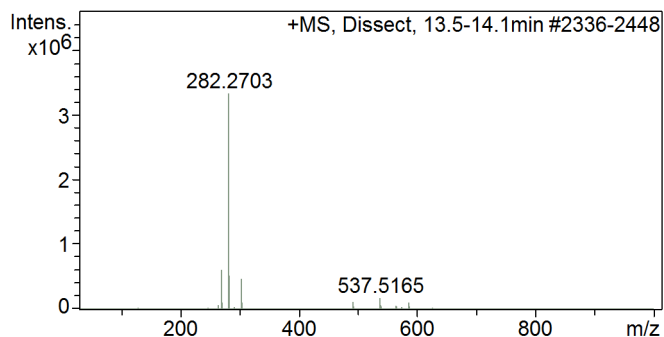

| #  | m/z      | Res.  | S/N   | I       | I %   | FWHM   |
|----|----------|-------|-------|---------|-------|--------|
| 1  | 265.2438 | 32069 | 18.6  | 62433   | 1.9   | 0.0083 |
| 2  | 270.2702 | 34924 | 182.9 | 614756  | 18.4  | 0.0077 |
| 3  | 271.2736 | 31981 | 30.2  | 101681  | 3.0   | 0.0085 |
| 4  | 282.2703 | 22577 | 992.5 | 3336231 | 100.0 | 0.0125 |
| 5  | 283.2730 | 36854 | 157.9 | 530771  | 15.9  | 0.0077 |
| 6  | 304.2510 | 36865 | 141.2 | 474755  | 14.2  | 0.0083 |
| 7  | 305.2543 | 32232 | 30.0  | 100978  | 3.0   | 0.0095 |
| 8  | 492.2765 | 32646 | 32.3  | 108422  | 3.2   | 0.0151 |
| 9  | 537.5165 | 30935 | 52.9  | 177969  | 5.3   | 0.0174 |
| 10 | 585.5129 | 35468 | 30.7  | 103221  | 3.1   | 0.0165 |

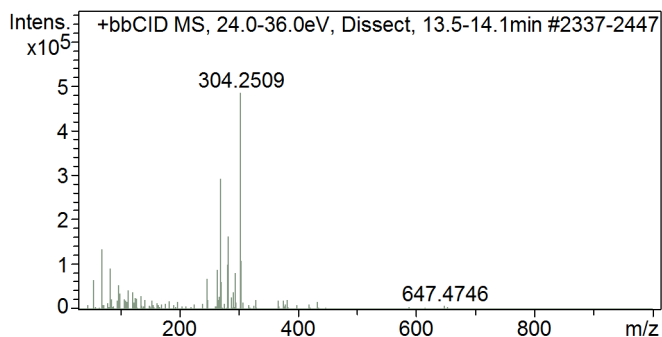

| #  | m/z      | Res.  | S/N   | I      | I %   | FWHM   |
|----|----------|-------|-------|--------|-------|--------|
| 1  | 69.0672  | 19268 | 279.6 | 135466 | 28.0  | 0.0036 |
| 2  | 83.0825  | 21132 | 191.6 | 92854  | 19.2  | 0.0039 |
| 3  | 247.2338 | 34716 | 144.2 | 69880  | 14.4  | 0.0071 |
| 4  | 265.2437 | 35943 | 183.5 | 88934  | 18.4  | 0.0074 |
| 5  | 270.2701 | 35659 | 604.3 | 292783 | 60.4  | 0.0076 |
| 6  | 282.2698 | 23282 | 209.1 | 101312 | 20.9  | 0.0121 |
| 7  | 283.2730 | 36989 | 338.8 | 164154 | 33.9  | 0.0077 |
| 8  | 295.1629 | 31160 | 169.0 | 81880  | 16.9  | 0.0095 |
| 9  | 304.2509 | 37832 | 999.9 | 484505 | 100.0 | 0.0080 |
| 10 | 305.2543 | 33864 | 225.8 | 109410 | 22.6  | 0.0090 |

# Compound Spectrum List Report

## Cmpd 116, Dissect, 13.9 min

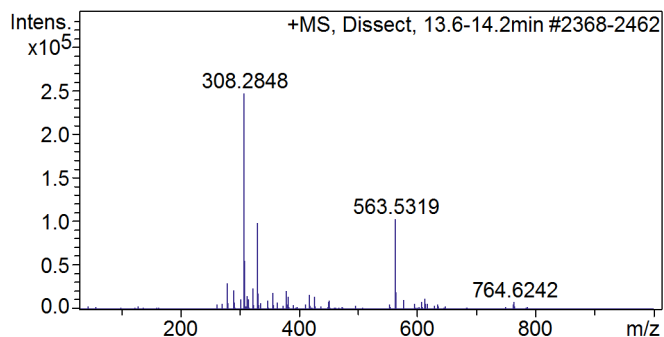

| #  | m/z      | Res.  | S/N   | I      | I %   | FWHM   |
|----|----------|-------|-------|--------|-------|--------|
| 1  | 280.2544 | 32147 | 123.5 | 30568  | 12.4  | 0.0087 |
| 2  | 291.2587 | 31238 | 90.5  | 22404  | 9.1   | 0.0093 |
| 3  | 308.2848 | 33699 | 997.7 | 246945 | 100.0 | 0.0091 |
| 4  | 309.2881 | 31944 | 225.6 | 55841  | 22.6  | 0.0097 |
| 5  | 323.1535 | 31170 | 97.5  | 24139  | 9.8   | 0.0104 |
| 6  | 331.2717 | 29084 | 399.5 | 98869  | 40.0  | 0.0114 |
| 7  | 357.2881 | 30572 | 77.6  | 19205  | 7.8   | 0.0117 |
| 8  | 379.2691 | 30941 | 87.2  | 21589  | 8.7   | 0.0123 |
| 9  | 563.5319 | 39473 | 416.1 | 102984 | 41.7  | 0.0143 |
| 10 | 564.5351 | 34197 | 79.9  | 19764  | 8.0   | 0.0165 |

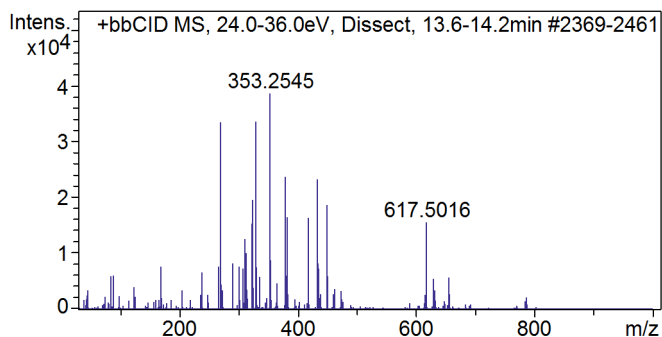

| #  | m/z      | Res.  | S/N   | I     | I %   | FWHM   |
|----|----------|-------|-------|-------|-------|--------|
| 1  | 270.2702 | 34233 | 862.0 | 33354 | 86.2  | 0.0079 |
| 2  | 324.3153 | 30876 | 505.6 | 19565 | 50.6  | 0.0105 |
| 3  | 330.2659 | 31902 | 867.4 | 33562 | 86.7  | 0.0104 |
| 4  | 353.2545 | 33797 | 999.9 | 38693 | 100.0 | 0.0105 |
| 5  | 379.2692 | 31540 | 612.7 | 23708 | 61.3  | 0.0120 |
| 6  | 383.1913 | 33323 | 424.9 | 16442 | 42.5  | 0.0115 |
| 7  | 418.3151 | 30905 | 424.8 | 16439 | 42.5  | 0.0135 |
| 8  | 433.3642 | 32032 | 600.6 | 23241 | 60.1  | 0.0135 |
| 9  | 449.3583 | 31630 | 483.3 | 18702 | 48.3  | 0.0142 |
| 10 | 617.5016 | 29672 | 403.0 | 15593 | 40.3  | 0.0208 |

## Cmpd 117, Dissect, 14.0 min

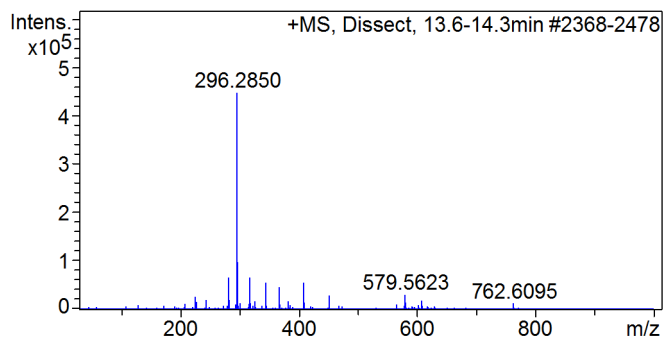

| #  | m/z      | Res.  | S/N   | I      | I %   | FWHM   |
|----|----------|-------|-------|--------|-------|--------|
| 1  | 282.2699 | 32077 | 149.7 | 67081  | 15.0  | 0.0088 |
| 2  | 296.2486 | 30144 | 64.9  | 29068  | 6.5   | 0.0098 |
| 3  | 296.2850 | 35776 | 998.3 | 447205 | 100.0 | 0.0083 |
| 4  | 297.2885 | 31934 | 217.8 | 97580  | 21.8  | 0.0093 |
| 5  | 318.2663 | 31240 | 149.9 | 67172  | 15.0  | 0.0102 |
| 6  | 345.2884 | 32626 | 123.9 | 55497  | 12.4  | 0.0106 |
| 7  | 367.2697 | 31962 | 104.4 | 46757  | 10.5  | 0.0115 |
| 8  | 408.2947 | 33859 | 125.4 | 56160  | 12.6  | 0.0121 |
| 9  | 451.3739 | 31465 | 65.4  | 29296  | 6.6   | 0.0143 |
| 10 | 579.5623 | 31490 | 69.0  | 30901  | 6.9   | 0.0184 |

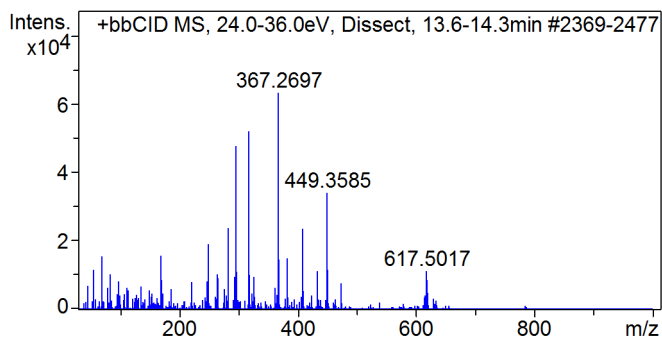

| #  | m/z      | Res.  | S/N   | I     | I %   | FWHM   |
|----|----------|-------|-------|-------|-------|--------|
| 1  | 170.1120 | 27121 | 250.4 | 15848 | 25.1  | 0.0063 |
| 2  | 250.1696 | 29790 | 302.4 | 19143 | 30.3  | 0.0084 |
| 3  | 283.2539 | 29634 | 376.1 | 23806 | 37.6  | 0.0096 |
| 4  | 283.2731 | 29021 | 291.4 | 18449 | 29.2  | 0.0098 |
| 5  | 296.2487 | 30990 | 388.2 | 24575 | 38.9  | 0.0096 |
| 6  | 296.2852 | 32937 | 752.3 | 47620 | 75.3  | 0.0090 |
| 7  | 318.2664 | 32240 | 820.7 | 51952 | 82.1  | 0.0099 |
| 8  | 367.2697 | 32495 | 999.1 | 63243 | 100.0 | 0.0113 |
| 9  | 408.2948 | 32043 | 374.1 | 23679 | 37.4  | 0.0127 |
| 10 | 449.3585 | 31503 | 538.8 | 34109 | 53.9  | 0.0143 |

# Compound Spectrum List Report

## Cmpd 118, Dissect, 14.1 min

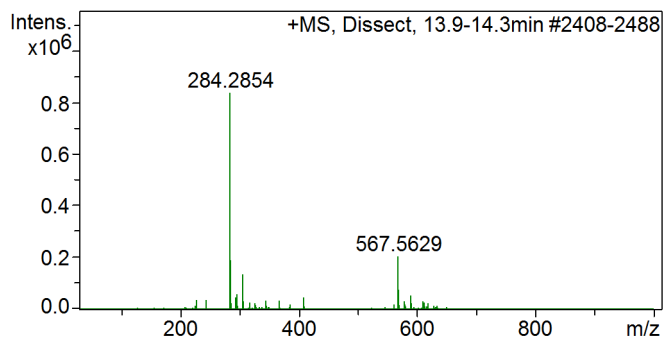

| #  | m/z      | Res.  | S/N   | I      | I %   | FWHM   |
|----|----------|-------|-------|--------|-------|--------|
| 1  | 244.1827 | 30169 | 44.0  | 36942  | 4.4   | 0.0081 |
| 2  | 284.2854 | 29618 | 996.5 | 836956 | 100.0 | 0.0096 |
| 3  | 285.2887 | 36099 | 228.7 | 192050 | 22.9  | 0.0079 |
| 4  | 294.2330 | 30312 | 57.1  | 47989  | 5.7   | 0.0097 |
| 5  | 296.2851 | 34916 | 71.3  | 59873  | 7.2   | 0.0085 |
| 6  | 306.2666 | 33893 | 161.9 | 136006 | 16.3  | 0.0090 |
| 7  | 408.2946 | 33463 | 57.3  | 48115  | 5.7   | 0.0122 |
| 8  | 567.5629 | 47966 | 245.9 | 206573 | 24.7  | 0.0118 |
| 9  | 568.5662 | 41718 | 92.6  | 77738  | 9.3   | 0.0136 |
| 10 | 589.5442 | 34966 | 64.8  | 54409  | 6.5   | 0.0169 |

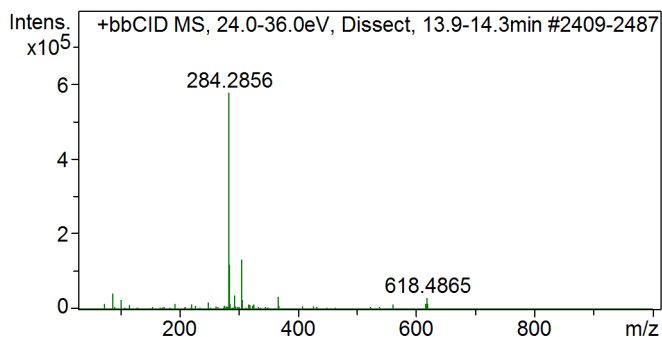

| #  | m/z      | Res.  | S/N   | I      | I %   | FWHM   |
|----|----------|-------|-------|--------|-------|--------|
| 1  | 88.0726  | 20657 | 74.2  | 42888  | 7.4   | 0.0043 |
| 2  | 102.0879 | 21590 | 45.9  | 26539  | 4.6   | 0.0047 |
| 3  | 250.1697 | 29463 | 30.3  | 17516  | 3.0   | 0.0085 |
| 4  | 284.2856 | 23569 | 998.0 | 577016 | 100.0 | 0.0121 |
| 5  | 285.2887 | 36923 | 208.2 | 120365 | 20.9  | 0.0077 |
| 6  | 294.2332 | 30904 | 66.7  | 38565  | 6.7   | 0.0095 |
| 7  | 306.2666 | 35599 | 231.3 | 133726 | 23.2  | 0.0086 |
| 8  | 307.2700 | 31368 | 44.6  | 25807  | 4.5   | 0.0098 |
| 9  | 367.2697 | 32000 | 61.6  | 35613  | 6.2   | 0.0115 |
| 10 | 618.4865 | 26346 | 55.3  | 31964  | 5.5   | 0.0235 |

## Cmpd 119, Dissect, 14.2 min

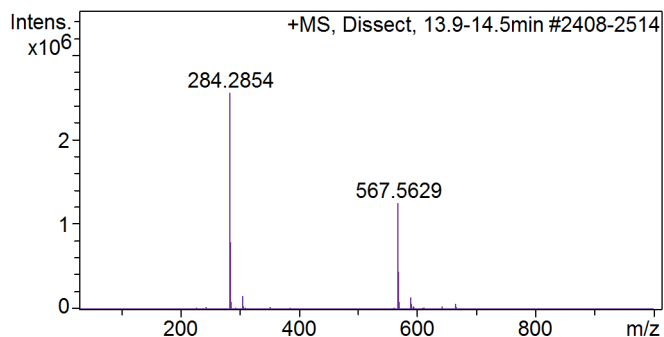

| #  | m/z      | Res.  | S/N   | I       | I %   | FWHM   |
|----|----------|-------|-------|---------|-------|--------|
| 1  | 284.2854 | 26692 | 998.4 | 2553507 | 100.0 | 0.0107 |
| 2  | 285.2886 | 37223 | 309.3 | 790975  | 31.0  | 0.0077 |
| 3  | 286.2918 | 31322 | 33.7  | 86303   | 3.4   | 0.0091 |
| 4  | 306.2665 | 34529 | 63.4  | 162149  | 6.4   | 0.0089 |
| 5  | 567.5629 | 49766 | 491.7 | 1257736 | 49.3  | 0.0114 |
| 6  | 568.5663 | 43233 | 175.0 | 447592  | 17.5  | 0.0132 |
| 7  | 569.5692 | 33487 | 35.2  | 89953   | 3.5   | 0.0170 |
| 8  | 589.5443 | 36261 | 58.2  | 148961  | 5.8   | 0.0163 |
| 9  | 590.5474 | 32975 | 24.0  | 61478   | 2.4   | 0.0179 |
| 10 | 664.5624 | 32750 | 24.1  | 61601   | 2.4   | 0.0203 |

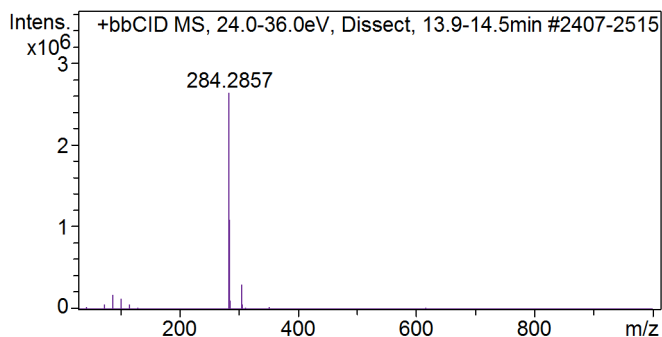

| #  | m/z      | Res.  | S/N   | I       | I %   | FWHM   |
|----|----------|-------|-------|---------|-------|--------|
| 1  | 74.0573  | 19235 | 21.7  | 58707   | 2.2   | 0.0039 |
| 2  | 88.0725  | 21007 | 68.8  | 185884  | 7.1   | 0.0042 |
| 3  | 102.0879 | 21754 | 50.7  | 137180  | 5.2   | 0.0047 |
| 4  | 116.1031 | 22830 | 21.9  | 59325   | 2.3   | 0.0051 |
| 5  | 284.2857 | 20517 | 974.4 | 2633888 | 100.0 | 0.0139 |
| 6  | 285.2690 | 32125 | 10.5  | 28472   | 1.1   | 0.0089 |
| 7  | 285.2886 | 37730 | 403.8 | 1091577 | 41.4  | 0.0076 |
| 8  | 286.2918 | 32640 | 39.0  | 105454  | 4.0   | 0.0088 |
| 9  | 306.2665 | 36610 | 113.6 | 306998  | 11.7  | 0.0084 |
| 10 | 307.2699 | 31854 | 22.4  | 60446   | 2.3   | 0.0096 |

# Compound Spectrum List Report

## Cmpd 120, Dissect, 14.3 min

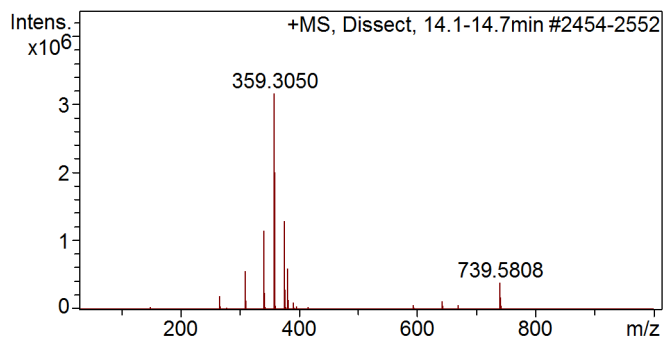

| #  | m/z      | Res.  | S/N   | I       | I %   | FWHM   |
|----|----------|-------|-------|---------|-------|--------|
| 1  | 267.2592 | 32824 | 61.4  | 197262  | 6.2   | 0.0081 |
| 2  | 310.2999 | 37031 | 175.4 | 563668  | 17.8  | 0.0084 |
| 3  | 341.2933 | 40313 | 359.5 | 1155480 | 36.5  | 0.0085 |
| 4  | 342.2968 | 36090 | 77.1  | 247896  | 7.8   | 0.0095 |
| 5  | 359.3050 | 17242 | 983.7 | 3161572 | 100.0 | 0.0208 |
| 6  | 360.3067 | 41584 | 623.0 | 2002363 | 63.3  | 0.0087 |
| 7  | 376.3292 | 42298 | 402.5 | 1293423 | 40.9  | 0.0089 |
| 8  | 377.3325 | 38207 | 91.9  | 295347  | 9.3   | 0.0099 |
| 9  | 381.2845 | 41209 | 186.8 | 600256  | 19.0  | 0.0093 |
| 10 | 739.5808 | 41193 | 124.3 | 399612  | 12.6  | 0.0180 |

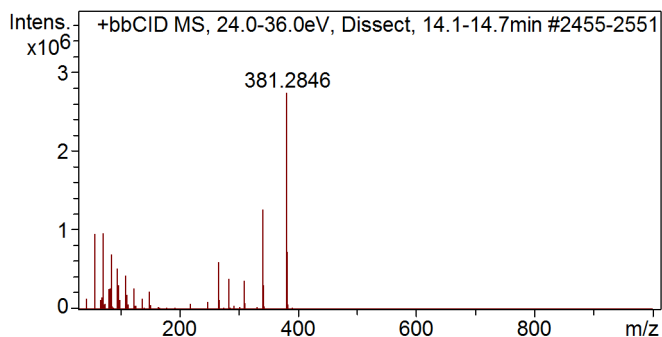

| #  | m/z      | Res.  | S/N   | I       | I %   | FWHM   |
|----|----------|-------|-------|---------|-------|--------|
| 1  | 57.0676  | 17814 | 345.9 | 953754  | 34.9  | 0.0032 |
| 2  | 71.0828  | 20463 | 348.5 | 961180  | 35.1  | 0.0035 |
| 3  | 85.0981  | 21486 | 253.1 | 697918  | 25.5  | 0.0040 |
| 4  | 95.0822  | 22580 | 187.3 | 516526  | 18.9  | 0.0042 |
| 5  | 109.0974 | 23718 | 155.6 | 429218  | 15.7  | 0.0046 |
| 6  | 267.2592 | 37223 | 218.2 | 601849  | 22.0  | 0.0072 |
| 7  | 284.2852 | 31016 | 142.1 | 391747  | 14.3  | 0.0092 |
| 8  | 341.2935 | 37569 | 458.9 | 1265463 | 46.3  | 0.0091 |
| 9  | 381.2846 | 38799 | 991.9 | 2735424 | 100.0 | 0.0098 |
| 10 | 382.2879 | 40547 | 264.3 | 728836  | 26.6  | 0.0094 |

## Cmpd 121, Dissect, 14.3 min

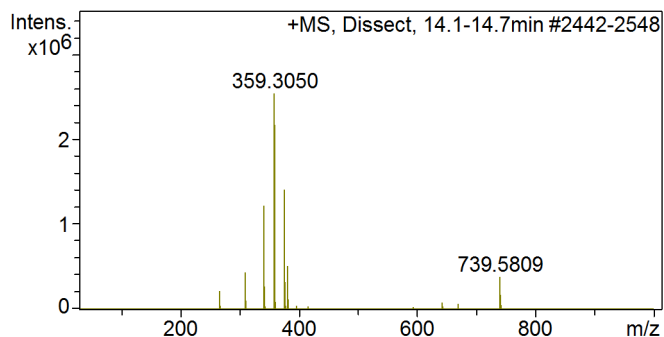

| #  | m/z      | Res.  | S/N   | I       | I %   | FWHM   |
|----|----------|-------|-------|---------|-------|--------|
| 1  | 267.2592 | 32805 | 80.5  | 222325  | 8.7   | 0.0081 |
| 2  | 310.2999 | 35863 | 157.8 | 435920  | 17.1  | 0.0087 |
| 3  | 341.2933 | 40273 | 440.7 | 1217836 | 47.9  | 0.0085 |
| 4  | 342.2968 | 36068 | 100.4 | 277446  | 10.9  | 0.0095 |
| 5  | 359.3050 | 16632 | 920.7 | 2544099 | 100.0 | 0.0216 |
| 6  | 360.3067 | 41599 | 783.4 | 2164653 | 85.1  | 0.0087 |
| 7  | 376.3292 | 42236 | 508.3 | 1404731 | 55.2  | 0.0089 |
| 8  | 377.3326 | 38132 | 118.3 | 326960  | 12.9  | 0.0099 |
| 9  | 381.2845 | 41058 | 186.2 | 514635  | 20.2  | 0.0093 |
| 10 | 739.5809 | 41631 | 139.2 | 384705  | 15.1  | 0.0178 |

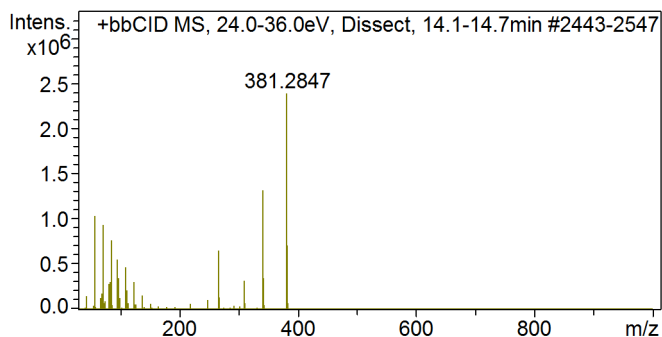

| #  | m/z      | Res.  | S/N   | I       | I %   | FWHM   |
|----|----------|-------|-------|---------|-------|--------|
| 1  | 57.0676  | 17822 | 432.1 | 1033848 | 43.2  | 0.0032 |
| 2  | 71.0828  | 20496 | 390.5 | 934266  | 39.1  | 0.0035 |
| 3  | 85.0980  | 21489 | 320.6 | 767029  | 32.1  | 0.0040 |
| 4  | 95.0822  | 22620 | 232.9 | 557209  | 23.3  | 0.0042 |
| 5  | 97.0978  | 22210 | 147.0 | 351694  | 14.7  | 0.0044 |
| 6  | 109.0974 | 23694 | 195.5 | 467644  | 19.5  | 0.0046 |
| 7  | 267.2592 | 37221 | 273.9 | 655294  | 27.4  | 0.0072 |
| 8  | 341.2935 | 37650 | 550.2 | 1316263 | 55.0  | 0.0091 |
| 9  | 381.2847 | 38221 | 999.9 | 2392213 | 100.0 | 0.0100 |
| 10 | 382.2879 | 40558 | 297.0 | 710668  | 29.7  | 0.0094 |

# Compound Spectrum List Report

## Cmpd 122, Dissect, 14.4 min

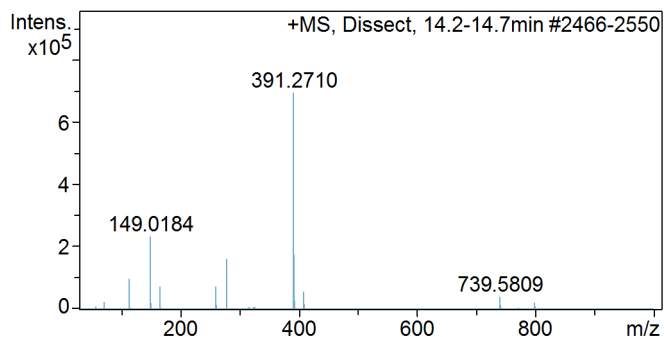

| #  | m/z      | Res.  | S/N   | I      | I %   | FWHM   |
|----|----------|-------|-------|--------|-------|--------|
| 1  | 113.1287 | 21555 | 142.0 | 99596  | 14.3  | 0.0052 |
| 2  | 149.0184 | 26475 | 333.7 | 234076 | 33.7  | 0.0056 |
| 3  | 167.0284 | 27286 | 105.5 | 74020  | 10.7  | 0.0061 |
| 4  | 261.1398 | 30227 | 106.7 | 74851  | 10.8  | 0.0086 |
| 5  | 279.1498 | 32923 | 230.5 | 161693 | 23.3  | 0.0085 |
| 6  | 391.2710 | 40502 | 989.5 | 694078 | 100.0 | 0.0097 |
| 7  | 392.2743 | 35001 | 253.3 | 177696 | 25.6  | 0.0112 |
| 8  | 393.2777 | 29326 | 38.3  | 26895  | 3.9   | 0.0134 |
| 9  | 408.2967 | 32435 | 83.9  | 58834  | 8.5   | 0.0126 |
| 10 | 739.5809 | 41264 | 60.1  | 42124  | 6.1   | 0.0179 |

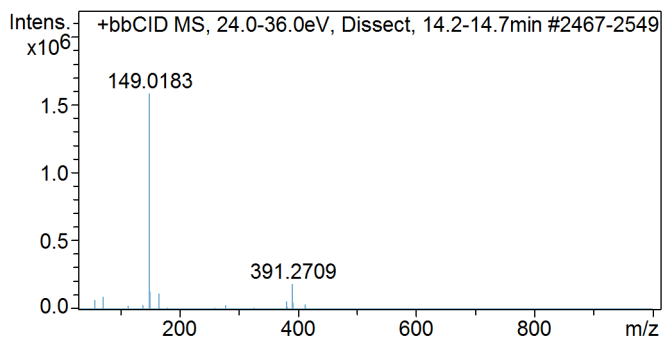

| #  | m/z      | Res.  | S/N   | I       | I %   | FWHM   |
|----|----------|-------|-------|---------|-------|--------|
| 1  | 57.0676  | 17847 | 43.7  | 69434   | 4.4   | 0.0032 |
| 2  | 71.0828  | 20454 | 59.3  | 94339   | 6.0   | 0.0035 |
| 3  | 149.0183 | 27977 | 996.1 | 1583981 | 100.0 | 0.0053 |
| 4  | 150.0217 | 25972 | 84.5  | 134404  | 8.5   | 0.0058 |
| 5  | 167.0284 | 27484 | 75.8  | 120579  | 7.6   | 0.0061 |
| 6  | 279.1497 | 31090 | 20.4  | 32467   | 2.0   | 0.0090 |
| 7  | 381.2847 | 38550 | 35.4  | 56294   | 3.6   | 0.0099 |
| 8  | 391.2709 | 34701 | 118.5 | 188382  | 11.9  | 0.0113 |
| 9  | 392.2743 | 31629 | 32.0  | 50827   | 3.2   | 0.0124 |
| 10 | 413.2521 | 34988 | 21.2  | 33640   | 2.1   | 0.0118 |

## Cmpd 123, Dissect, 14.5 min

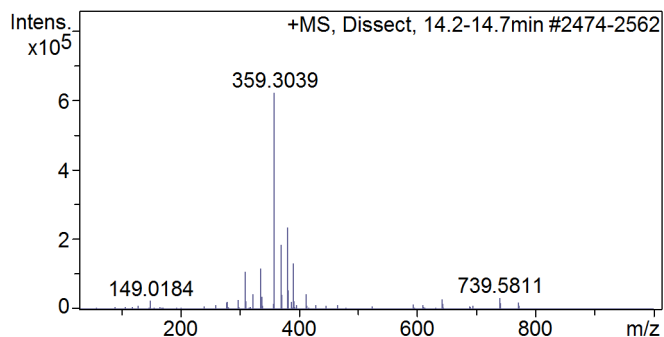

| #  | m/z      | Res.  | S/N   | I      | I %   | FWHM   |
|----|----------|-------|-------|--------|-------|--------|
| 1  | 310.3001 | 32153 | 175.0 | 109115 | 17.5  | 0.0097 |
| 2  | 323.2473 | 30874 | 72.7  | 45317  | 7.3   | 0.0105 |
| 3  | 336.3149 | 32850 | 188.6 | 117590 | 18.9  | 0.0102 |
| 4  | 359.3039 | 23487 | 997.4 | 621866 | 100.0 | 0.0153 |
| 5  | 371.3031 | 35050 | 297.9 | 185708 | 29.9  | 0.0106 |
| 6  | 372.3066 | 30548 | 68.7  | 42820  | 6.9   | 0.0122 |
| 7  | 381.2847 | 39908 | 376.5 | 234717 | 37.7  | 0.0096 |
| 8  | 382.2880 | 33186 | 90.5  | 56403  | 9.1   | 0.0115 |
| 9  | 391.2711 | 39860 | 213.9 | 133340 | 21.4  | 0.0098 |
| 10 | 413.2521 | 32282 | 70.9  | 44230  | 7.1   | 0.0128 |

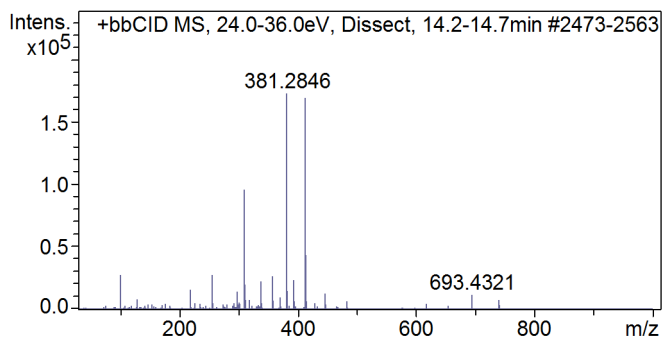

| #  | m/z      | Res.  | S/N    | I      | I %   | FWHM   |
|----|----------|-------|--------|--------|-------|--------|
| 1  | 101.0563 | 21196 | 159.8  | 27606  | 16.0  | 0.0048 |
| 2  | 256.2549 | 29843 | 160.4  | 27719  | 16.0  | 0.0086 |
| 3  | 310.3000 | 32596 | 553.1  | 95576  | 55.3  | 0.0095 |
| 4  | 311.3033 | 31420 | 115.5  | 19954  | 11.5  | 0.0099 |
| 5  | 338.3303 | 30497 | 132.4  | 22880  | 13.2  | 0.0111 |
| 6  | 358.2961 | 31416 | 154.9  | 26770  | 15.5  | 0.0114 |
| 7  | 381.2846 | 39984 | 1000.0 | 172798 | 100.0 | 0.0095 |
| 8  | 393.2833 | 30025 | 137.0  | 23673  | 13.7  | 0.0131 |
| 9  | 413.2523 | 35568 | 978.7  | 169118 | 97.9  | 0.0116 |
| 10 | 414.2555 | 31829 | 251.9  | 43535  | 25.2  | 0.0130 |

# Compound Spectrum List Report

## Cmpd 124, Dissect, 14.5 min

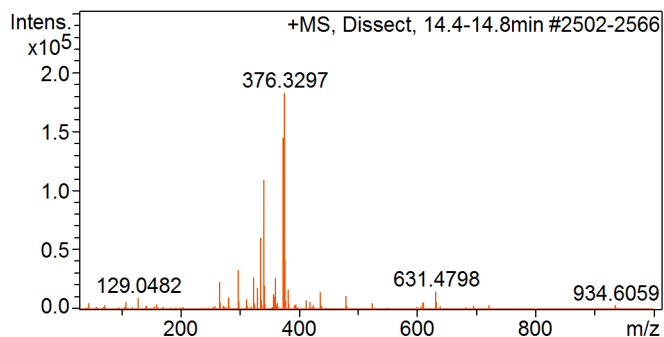

| #  | m/z      | Res.  | S/N   | I      | I %   | FWHM   |
|----|----------|-------|-------|--------|-------|--------|
| 1  | 267.2595 | 30193 | 127.9 | 23379  | 12.8  | 0.0089 |
| 2  | 298.3005 | 32354 | 183.0 | 33445  | 18.3  | 0.0092 |
| 3  | 324.3151 | 31317 | 149.4 | 27308  | 15.0  | 0.0104 |
| 4  | 336.3149 | 33146 | 332.4 | 60755  | 33.3  | 0.0101 |
| 5  | 341.2935 | 33036 | 595.6 | 108866 | 59.6  | 0.0103 |
| 6  | 361.2100 | 34571 | 146.4 | 26764  | 14.7  | 0.0104 |
| 7  | 374.2351 | 34717 | 791.4 | 144657 | 79.2  | 0.0108 |
| 8  | 376.2414 | 29347 | 139.0 | 25408  | 13.9  | 0.0128 |
| 9  | 376.3297 | 32605 | 999.3 | 182661 | 100.0 | 0.0115 |
| 10 | 377.3328 | 29427 | 230.7 | 42168  | 23.1  | 0.0128 |

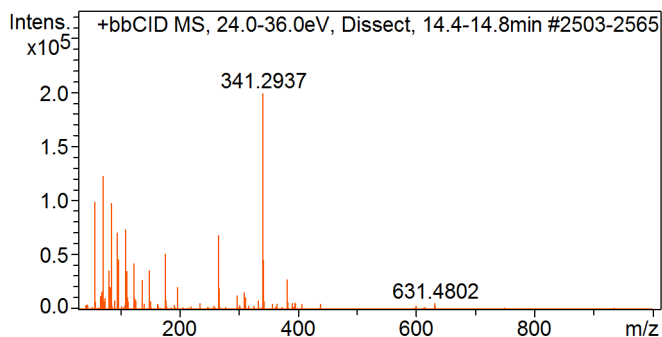

| #  | m/z      | Res.  | S/N   | I      | I %   | FWHM   |
|----|----------|-------|-------|--------|-------|--------|
| 1  | 57.0676  | 17472 | 496.0 | 98973  | 49.7  | 0.0033 |
| 2  | 71.0828  | 19220 | 614.9 | 122687 | 61.6  | 0.0037 |
| 3  | 85.0981  | 19721 | 489.9 | 97750  | 49.1  | 0.0043 |
| 4  | 95.0823  | 20323 | 355.2 | 70862  | 35.6  | 0.0047 |
| 5  | 97.0979  | 20306 | 230.1 | 45920  | 23.0  | 0.0048 |
| 6  | 109.0975 | 22172 | 370.7 | 73962  | 37.1  | 0.0049 |
| 7  | 177.1215 | 28245 | 258.3 | 51545  | 25.9  | 0.0063 |
| 8  | 267.2594 | 30380 | 343.8 | 68594  | 34.4  | 0.0088 |
| 9  | 341.2937 | 34968 | 998.6 | 199250 | 100.0 | 0.0098 |
| 10 | 342.2968 | 31836 | 228.9 | 45675  | 22.9  | 0.0108 |

## Cmpd 125, Dissect, 14.7 min

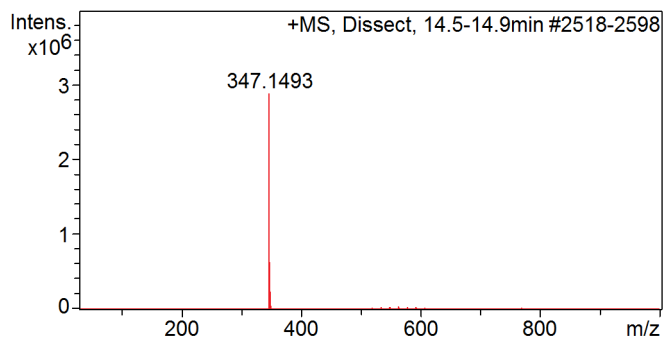

| #  | m/z      | Res.  | S/N   | I       | I %   | FWHM   |
|----|----------|-------|-------|---------|-------|--------|
| 1  | 347.1493 | 40925 | 993.7 | 2888012 | 100.0 | 0.0085 |
| 2  | 348.1523 | 38167 | 217.5 | 632122  | 21.9  | 0.0091 |
| 3  | 349.1460 | 31015 | 84.4  | 245427  | 8.5   | 0.0113 |
| 4  | 350.1484 | 28902 | 17.5  | 50964   | 1.8   | 0.0121 |
| 5  | 533.7014 | 36327 | 10.2  | 29738   | 1.0   | 0.0147 |
| 6  | 548.3765 | 36285 | 11.6  | 33645   | 1.2   | 0.0151 |
| 7  | 548.7108 | 36929 | 10.4  | 30091   | 1.0   | 0.0149 |
| 8  | 563.0512 | 37791 | 12.4  | 36125   | 1.3   | 0.0149 |
| 9  | 563.3855 | 37202 | 11.3  | 32749   | 1.1   | 0.0151 |
| 10 | 578.0605 | 37047 | 10.2  | 29670   | 1.0   | 0.0156 |

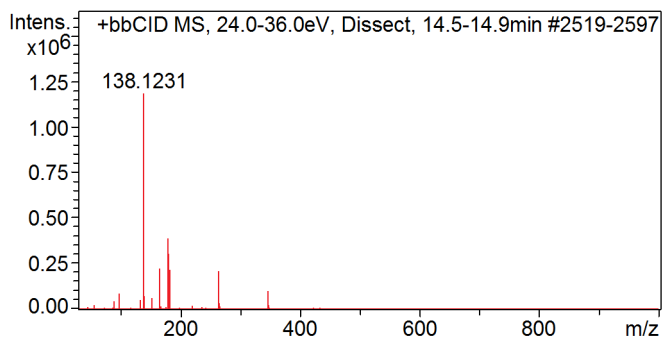

| #  | m/z      | Res.  | S/N   | I       | I %   | FWHM   |
|----|----------|-------|-------|---------|-------|--------|
| 1  | 98.0931  | 21013 | 75.0  | 88997   | 7.5   | 0.0047 |
| 2  | 138.1231 | 26899 | 996.7 | 1182473 | 100.0 | 0.0051 |
| 3  | 139.1265 | 23715 | 62.0  | 73549   | 6.2   | 0.0059 |
| 4  | 152.1383 | 25788 | 55.1  | 65310   | 5.5   | 0.0059 |
| 5  | 165.9724 | 28975 | 189.7 | 224999  | 19.0  | 0.0057 |
| 6  | 180.1686 | 30256 | 330.0 | 391461  | 33.1  | 0.0060 |
| 7  | 181.1759 | 28933 | 258.8 | 307081  | 26.0  | 0.0063 |
| 8  | 182.9983 | 29678 | 183.3 | 217417  | 18.4  | 0.0062 |
| 9  | 265.0739 | 34052 | 177.2 | 210182  | 17.8  | 0.0078 |
| 10 | 347.1495 | 33998 | 85.5  | 101489  | 8.6   | 0.0102 |

# Compound Spectrum List Report

## Cmpd 126, Dissect, 14.8 min

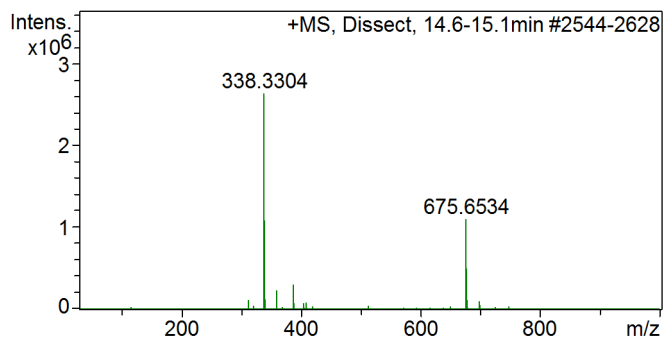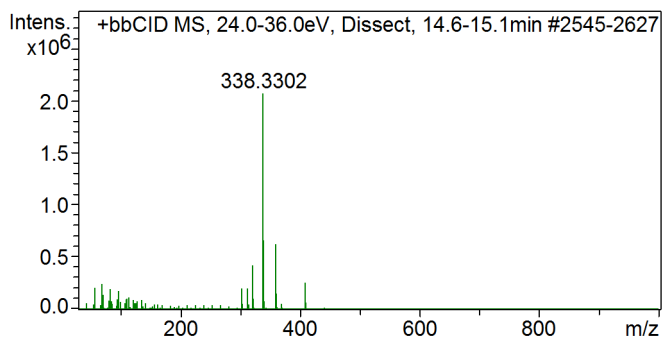

| #  | m/z      | Res.  | S/N   | I       | I %   | FWHM   |
|----|----------|-------|-------|---------|-------|--------|
| 1  | 312.3158 | 34045 | 45.1  | 119751  | 4.5   | 0.0092 |
| 2  | 338.3304 | 27850 | 992.4 | 2637028 | 100.0 | 0.0121 |
| 3  | 339.3337 | 40200 | 408.0 | 1084205 | 41.1  | 0.0084 |
| 4  | 340.3370 | 33012 | 48.3  | 128290  | 4.9   | 0.0103 |
| 5  | 360.3114 | 36322 | 89.5  | 237914  | 9.0   | 0.0099 |
| 6  | 387.3337 | 38833 | 116.5 | 309453  | 11.7  | 0.0100 |
| 7  | 675.6534 | 49657 | 415.1 | 1103050 | 41.8  | 0.0136 |
| 8  | 676.6567 | 43981 | 190.5 | 506230  | 19.2  | 0.0154 |
| 9  | 677.6597 | 34276 | 46.1  | 122626  | 4.7   | 0.0198 |
| 10 | 697.6345 | 33458 | 36.2  | 96302   | 3.7   | 0.0209 |

| #  | m/z      | Res.  | S/N   | I       | I %   | FWHM   |
|----|----------|-------|-------|---------|-------|--------|
| 1  | 57.0676  | 17708 | 102.9 | 213514  | 10.3  | 0.0032 |
| 2  | 69.0672  | 19154 | 119.4 | 247820  | 12.0  | 0.0036 |
| 3  | 83.0824  | 20784 | 95.7  | 198708  | 9.6   | 0.0040 |
| 4  | 303.2944 | 34633 | 99.6  | 206688  | 10.0  | 0.0088 |
| 5  | 312.3156 | 35567 | 99.3  | 206022  | 9.9   | 0.0088 |
| 6  | 321.3043 | 37205 | 203.7 | 422765  | 20.4  | 0.0086 |
| 7  | 338.3302 | 33142 | 997.9 | 2071313 | 100.0 | 0.0102 |
| 8  | 339.3335 | 39304 | 320.1 | 664426  | 32.1  | 0.0086 |
| 9  | 360.3113 | 39618 | 301.9 | 626606  | 30.3  | 0.0091 |
| 10 | 409.3148 | 38859 | 125.4 | 260240  | 12.6  | 0.0105 |

## Cmpd 127, Dissect, 15.0 min

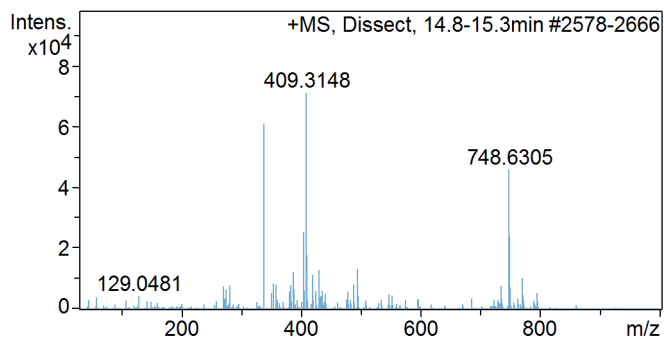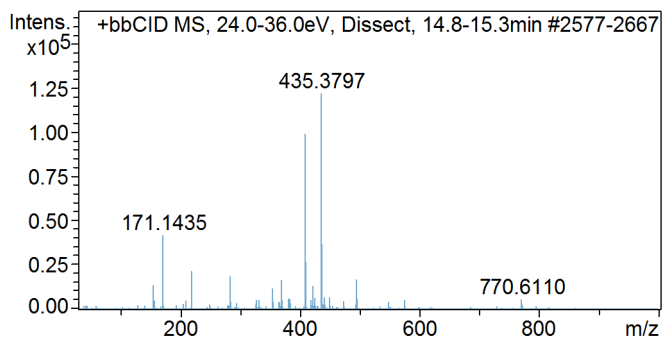

| #  | m/z      | Res.  | S/N   | I     | I %   | FWHM   |
|----|----------|-------|-------|-------|-------|--------|
| 1  | 338.3302 | 35563 | 856.4 | 60935 | 85.7  | 0.0095 |
| 2  | 387.3337 | 37354 | 175.6 | 12494 | 17.6  | 0.0104 |
| 3  | 404.3597 | 33280 | 358.9 | 25537 | 35.9  | 0.0122 |
| 4  | 409.3148 | 34620 | 999.9 | 71142 | 100.0 | 0.0118 |
| 5  | 410.3182 | 30181 | 250.8 | 17842 | 25.1  | 0.0136 |
| 6  | 419.3012 | 32226 | 161.7 | 11505 | 16.2  | 0.0130 |
| 7  | 430.2957 | 31727 | 184.7 | 13142 | 18.5  | 0.0136 |
| 8  | 494.5485 | 31735 | 190.0 | 13516 | 19.0  | 0.0156 |
| 9  | 748.6305 | 29481 | 645.2 | 45906 | 64.5  | 0.0254 |
| 10 | 749.6336 | 29136 | 339.3 | 24139 | 33.9  | 0.0257 |

| #  | m/z      | Res.  | S/N   | I      | I %   | FWHM   |
|----|----------|-------|-------|--------|-------|--------|
| 1  | 154.1175 | 26044 | 113.9 | 13911  | 11.4  | 0.0059 |
| 2  | 171.1435 | 28128 | 344.6 | 42081  | 34.5  | 0.0061 |
| 3  | 220.1235 | 29099 | 179.6 | 21928  | 18.0  | 0.0076 |
| 4  | 284.2853 | 30225 | 156.4 | 19094  | 15.6  | 0.0094 |
| 5  | 369.3238 | 33000 | 136.6 | 16680  | 13.7  | 0.0112 |
| 6  | 409.3150 | 38055 | 811.2 | 99054  | 81.1  | 0.0108 |
| 7  | 410.3184 | 32398 | 220.8 | 26963  | 22.1  | 0.0127 |
| 8  | 435.3797 | 35645 | 999.9 | 122096 | 100.0 | 0.0122 |
| 9  | 436.3828 | 32291 | 303.6 | 37077  | 30.4  | 0.0135 |
| 10 | 494.5487 | 31544 | 140.0 | 17100  | 14.0  | 0.0157 |



# Compound Spectrum List Report

## Cmpd 128, Dissect, 15.1 min

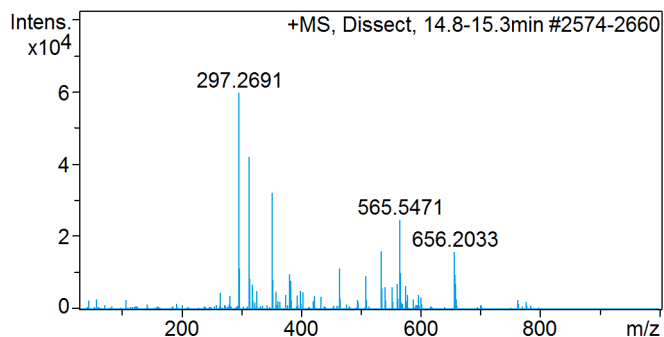

| #  | m/z      | Res.  | S/N   | I     | I %   | FWHM   |
|----|----------|-------|-------|-------|-------|--------|
| 1  | 297.2691 | 33085 | 999.7 | 59677 | 100.0 | 0.0090 |
| 2  | 298.2721 | 28282 | 188.8 | 11273 | 18.9  | 0.0105 |
| 3  | 314.2950 | 32339 | 703.1 | 41971 | 70.3  | 0.0097 |
| 4  | 352.3456 | 31289 | 538.0 | 32116 | 53.8  | 0.0113 |
| 5  | 381.2847 | 31449 | 164.6 | 9828  | 16.5  | 0.0121 |
| 6  | 464.4149 | 30650 | 189.8 | 11333 | 19.0  | 0.0152 |
| 7  | 534.4695 | 31500 | 269.1 | 16067 | 26.9  | 0.0170 |
| 8  | 565.5471 | 31520 | 415.1 | 24781 | 41.5  | 0.0179 |
| 9  | 566.5505 | 30785 | 170.3 | 10164 | 17.0  | 0.0184 |
| 10 | 656.2033 | 31082 | 267.9 | 15994 | 26.8  | 0.0211 |

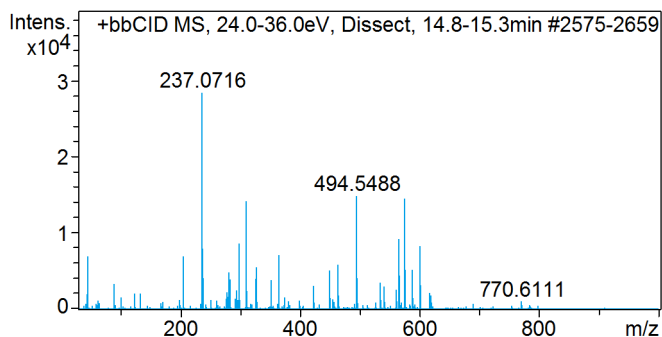

| #  | m/z      | Res.  | S/N   | I     | I %   | FWHM   |
|----|----------|-------|-------|-------|-------|--------|
| 1  | 45.0316  | 15804 | 246.2 | 6990  | 24.6  | 0.0028 |
| 2  | 237.0716 | 30442 | 999.5 | 28375 | 100.0 | 0.0078 |
| 3  | 238.0725 | 25766 | 281.3 | 7987  | 28.1  | 0.0092 |
| 4  | 299.2957 | 30762 | 304.1 | 8633  | 30.4  | 0.0097 |
| 5  | 310.3002 | 30798 | 501.1 | 14225 | 50.1  | 0.0101 |
| 6  | 365.0932 | 31936 | 251.9 | 7151  | 25.2  | 0.0114 |
| 7  | 494.5488 | 32071 | 523.6 | 14865 | 52.4  | 0.0154 |
| 8  | 565.5472 | 31074 | 325.6 | 9243  | 32.6  | 0.0182 |
| 9  | 574.4612 | 30792 | 511.3 | 14515 | 51.2  | 0.0187 |
| 10 | 600.4758 | 30117 | 293.3 | 8328  | 29.3  | 0.0199 |

## Cmpd 129, Dissect, 15.2 min

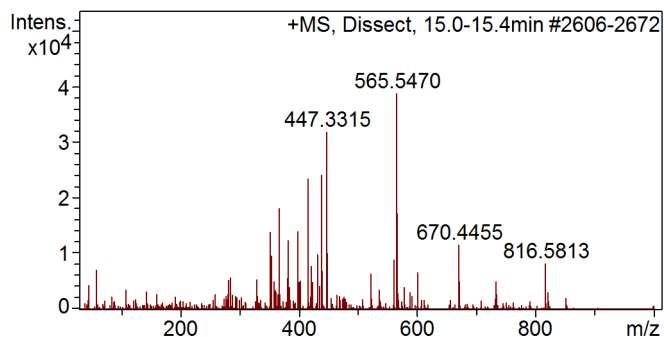

| #  | m/z      | Res.  | S/N    | I     | I %   | FWHM   |
|----|----------|-------|--------|-------|-------|--------|
| 1  | 352.3458 | 31912 | 358.5  | 13924 | 35.9  | 0.0110 |
| 2  | 367.3237 | 32354 | 382.8  | 14867 | 38.3  | 0.0114 |
| 3  | 367.3641 | 32147 | 469.0  | 18217 | 46.9  | 0.0114 |
| 4  | 383.1913 | 33657 | 321.5  | 12487 | 32.2  | 0.0114 |
| 5  | 399.3337 | 28985 | 361.7  | 14050 | 36.2  | 0.0138 |
| 6  | 416.3700 | 30825 | 602.9  | 23419 | 60.3  | 0.0135 |
| 7  | 439.3410 | 30442 | 619.9  | 24075 | 62.0  | 0.0144 |
| 8  | 447.3315 | 32936 | 817.4  | 31748 | 81.7  | 0.0136 |
| 9  | 565.5470 | 32459 | 1000.0 | 38839 | 100.0 | 0.0174 |
| 10 | 566.5502 | 31349 | 443.6  | 17231 | 44.4  | 0.0181 |

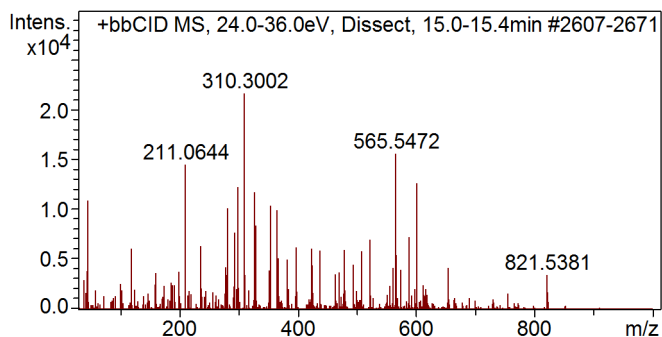

| #  | m/z      | Res.  | S/N    | I     | I %   | FWHM   |
|----|----------|-------|--------|-------|-------|--------|
| 1  | 45.0316  | 15754 | 502.7  | 10888 | 50.3  | 0.0029 |
| 2  | 211.0644 | 28355 | 669.8  | 14507 | 67.0  | 0.0074 |
| 3  | 282.2698 | 31204 | 467.5  | 10126 | 46.8  | 0.0090 |
| 4  | 299.2958 | 30578 | 566.6  | 12273 | 56.7  | 0.0098 |
| 5  | 310.3002 | 30574 | 1000.0 | 21660 | 100.0 | 0.0101 |
| 6  | 327.3263 | 30795 | 540.6  | 11710 | 54.1  | 0.0106 |
| 7  | 354.3611 | 30939 | 478.4  | 10363 | 47.8  | 0.0115 |
| 8  | 365.0933 | 31730 | 458.6  | 9934  | 45.9  | 0.0115 |
| 9  | 565.5472 | 32286 | 719.4  | 15582 | 71.9  | 0.0175 |
| 10 | 600.4759 | 29368 | 582.0  | 12606 | 58.2  | 0.0204 |

# Compound Spectrum List Report

Bruker Compass DataAnalysis 4.4

8/28/2021 7:16:25 PM

by: demo

Page 65 of 65

---

---

---
