# Supplementary material for: Assessment of Xenoestrogens in Jordanian Water System: Activity and Identification
Source: MDPI journal article supplement (doi:10.3390/toxics11010063), 2023-01-09
Supplement: s1 [file s1]

Supplementary Material S1

List of Potential Pharmaceutical pollutants (including psychoactive substances) and their metabolites

|    | <b>Name</b>                                       | <b>CAS Number</b>  |
|----|---------------------------------------------------|--------------------|
| 1  | 1-(2-Methoxyphenyl)piperazine                     | (35386-24-4)       |
| 2  | 1-(4-methoxyphenyl)piperazine. MeOPP              | (38212-30-5)       |
| 3  | 10-Hydroxycarbamazepine                           | (29331-92-8)       |
| 4  | 17-alpha-Methyltestosterone                       | (58-18-4)          |
| 5  | 1-Hydroxymethyltriazolam. alpha-Hydroxy-Triazolam | (37115-45-0)       |
| 6  | 1-Hydroxymidazolam                                | (59468-90-5)       |
| 7  | 1-Piperonylpiperazine                             | (32231-06-4)       |
| 8  | 2 C-D                                             | (24333-19-5)       |
| 9  | 2 C-P                                             | (207740-22-5)      |
| 10 | 2-5-DMA                                           | (2801-68-5)        |
| 11 | 25I-NBF                                           | (919797-21-0)      |
| 12 | 25I-NBoMe                                         | (919797-19-6)      |
| 13 | 2-Amino-5-chlorobenzophenone                      | (719-59-5)         |
| 14 | 2-Amino-5-nitrobenzophenone                       | (1775-95-7)        |
| 15 | 2-Aminoindane. 2-AI                               | (2975-41-9)        |
| 16 | 2-Benzyltetronic acid                             | (3734-22-3)        |
| 17 | 2C-B                                              | (66142-81-2)       |
| 18 | 2C-B-FLY                                          | (733720-95-1)      |
| 19 | 2C-C                                              | (88441-14-9)       |
| 20 | 2-C-C-NBoMe . 25C-NBoMe                           | (1227608-02-7)     |
| 21 | 2C-E                                              | (71539-34-9)       |
| 22 | 2C-H                                              | (3600-86-0)        |
| 23 | 2C-I                                              | (69587-11-7)       |
| 24 | 2CT-2                                             | (207740-24-7)      |
| 25 | 2C-T-4                                            | (207740-25-8)      |
| 26 | 2C-T-7                                            | (207740-26-9)      |
| 27 | 2-DPMP (desoxyipipradrole)                        | (519-74-4)         |
| 28 | 2-Fluoroamphetamin                                | (1716-60-5)        |
| 29 | 2-Fluoroethcathinone. 2-FEC                       | (na)               |
| 30 | 2-fluoromethcathinone                             | (1186137-35-8)     |
| 31 | 2-F-Methamphetamine                               | (1017176-48-5)     |
| 32 | 2-Hydroxyibuprofen                                | (51146-55-5)       |
| 33 | 2-MEC. 2-Methylethcathinone                       | (na)               |
| 34 | 2-MeO-Diphenidine. Methoxphenidine                | (127529-46-8)      |
| 35 | 2-MMC. 2-Methylmethcathinone                      | (1246815-51-9.HCl) |

|    |                                      |                     |
|----|--------------------------------------|---------------------|
| 36 | 2-OH-Ethylflurazepam                 | (19011-77-9)        |
| 37 | 2-Oxo-3-hydroxy-LSD                  | (na)                |
| 38 | 2-Phenethylamine                     | (64-04-0)           |
| 39 | 3,4,5-Trimethoxyamphetamine. TMA     | (1082-88-8)         |
| 40 | 3,4-Dimethoxyphenethylamine. DMPEA   | (120-20-7)          |
| 41 | 3,4-Dimethylethcathinone             | (na)                |
| 42 | 3,4-Methylenedioxy-n-benzylcathinone | (1823274-68-5.HCl)  |
| 43 | 3,5-Diiodotyrosine                   | (66-02-4)           |
| 44 | 3-4-CTMP                             | (1400742-68-8)      |
| 45 | 3-4-DMA                              | (120-26-3)          |
| 46 | 3-4-DMMC                             | (1081772-06-6 HCl)  |
| 47 | 3-Ethylethcathinone                  | (na)                |
| 48 | 3-F-Amphetamine                      | (1626-71-7)         |
| 49 | 3-Fluorophenmetrazine                | (1350768-28-3)      |
| 50 | 3-F-Methamphetamine                  | (na)                |
| 51 | 3-F-Methcathinone. 3-FMC             | (1049677-77-1)      |
| 52 | 3-Hydroxyphenazepam                  | (70030-11-4)        |
| 53 | 3-MBZP                               | (MBZP 374898-00-7)  |
| 54 | 3-MEC. 3-Methylethcathinone          | (na)                |
| 55 | 3-MeO-PCP                            | (72242-03-6)        |
| 56 | 3-Methylfentanyl                     | (42045-86-3)        |
| 57 | 3-Methylnorfentanyl                  | (na)                |
| 58 | 3-MMC. 3-Methylmethcathinone         | (1246816-62-5.HCl ) |
| 59 | 3-OH-Bromazepam                      | (13132-73-5)        |
| 60 | 3-OH-Flubromazepam                   | (62559-65-8)        |
| 61 | 4-Acetamidoantipyrine (4-AAA)        | (83-15-8)           |
| 62 | 4-Acetoxy-N-methyl-N-ethyltryptamine | (1445751-40-5)      |
| 63 | 4-AcO-DIPT                           | (na)                |
| 64 | 4-AcO-DMT. Psilacetin                | (92292-84-7)        |
| 65 | 4-Aminoantipyrine (4-AAP)            | (83-07-8)           |
| 66 | 4-Benzamidosalicylic acid            | (13898-58-3)        |
| 67 | 4-BMC. Brepheдрone                   | (486459-03-4)       |
| 68 | 4-CEC                                | (22198-75-0)        |
| 69 | 4-CMC. Clephedrone                   | (1225843-86-6)      |
| 70 | 4-Cyano CUMYL-BUTINACA               | (1631074-54-8)      |
| 71 | 4-EMC. 4-Ethylmethcathinone          | (1391053-87-4.HCl)  |
| 72 | 4-Ethylethcathinone                  | (1225619-32-8)      |
| 73 | 4-Ethylmethcathinone                 | (1225622-14-9)      |
| 74 | 4-Ethyl-N,N-Dimethylcathinone        | (na)                |
| 75 | 4F-alpha-PEP. 4F-PV8                 | (na)                |
| 76 | 4F-alpha-PVP                         | (850352-62-4)       |

|     |                                                         |                            |
|-----|---------------------------------------------------------|----------------------------|
| 77  | 4-F-Amphetamine                                         | (459-02-9)                 |
| 78  | 4-Fluoroethcathinone                                    | (1225625-74-0)             |
| 79  | 4-F-Methamphetamine                                     | (52063-62-4 HCl)           |
| 80  | 4-F-Methcathinone. 4-FMC. Flephedrone                   | (7589-35-7)                |
| 81  | 4-Formylaminoantipyrine (4-FAA)                         | (1672-58-8)                |
| 82  | 4-MEC                                                   | (1225617-18-4)             |
| 83  | 4-MeO-PCP                                               | (2201-35-6)                |
| 84  | 4-MePPP                                                 | (1313393-58-6. 28117-80-8) |
| 85  | 4-Methylaminoantipyrine (4-MAA). 4-Methylaminophenazone | (519-98-2)                 |
| 86  | 4-Methylbuphedrone                                      | (HCl.1336911-98-8)         |
| 87  | 4-MeTMP. 4-Methylmethylphenidate                        | (191790-79-1)              |
| 88  | 4-MMA (Methylmethamphetamine)                           | (161697-16-1.HCl)          |
| 89  | 4-MTA                                                   | (14116-06-4)               |
| 90  | 4-OH MET. Metocin                                       | (77872-41-4 )              |
| 91  | 4-OH-DIPT                                               | (63065-90-7)               |
| 92  | 5-(p-Methylphenyl)-5-phenylhydantoin (MPPH)             | (51169-17-6)               |
| 93  | 5-Aminosalicylic acid                                   | (89-57-6)                  |
| 94  | 5-APB                                                   | (286834-80-8)              |
| 95  | 5-APDB                                                  | (152624-03-8)              |
| 96  | 5-Carboxybupranolol                                     | (42242-69-3)               |
| 97  | 5-EAPB                                                  | (1445566-01-7)             |
| 98  | 5F-AMBICA                                               | (na)                       |
| 99  | 5-Fluoro AKB48 N-(4-hydroxypentyl) metabolite           | (1843184-42-8 )            |
| 100 | 5-fluoro MN-18 (AM2201 Indazol Carboxamide)             | (1445581-91-8 )            |
| 101 | 5-Fluoro PB-22 3-carboxyindole metabolite               | (1432794-98-3)             |
| 102 | 5-fluoro PY-PICA                                        | (na)                       |
| 103 | 5F-PB-22. 5-fluoro QUPIC                                | (1400742-41-7)             |
| 104 | 5-IAI                                                   | (132367-76-1)              |
| 105 | 5-IT. 5-API                                             | (3784-30-3 )               |
| 106 | 5-MAPB                                                  | (1354631-77-8)             |
| 107 | 5-MeO-AMT                                               | (1137-04-8)                |
| 108 | 5-MeO-DALT                                              | (928822-98-4)              |
| 109 | 5-MeO-DIPT                                              | (4021-34-5)                |
| 110 | 5-MeO-DMT                                               | (1019-45-0)                |
| 111 | 5-MeO-MIPT                                              | (96096-55-8)               |
| 112 | 5-MeOPP                                                 | (na)                       |
| 113 | 5-MeOT                                                  | (608-07-1)                 |
| 114 | 5-MeO-TMT                                               | (67292-68-6)               |

|     |                                         |                 |
|-----|-----------------------------------------|-----------------|
| 115 | 6-Acetylcodeine                         | (6703-27-1)     |
| 116 | 6-APB                                   | (286834-84-2)   |
| 117 | 6-APDB                                  | (152623-93-3)   |
| 118 | 6-Chlorothymolsulfonic acid             | (83732-70-1)    |
| 119 | 6-EAPB                                  | (1632539-47-9)  |
| 120 | 6-Mercaptopurine                        | (50-44-2)       |
| 121 | 6-O-Monoacetylmorphine (MAM)            | (2784-73-8)     |
| 122 | 7-Aminoclonazepam                       | (4959-17-5)     |
| 123 | 7-Aminodesmethyflunitrazepam            | (894-76-8)      |
| 124 | 7-Aminoflunitrazepam                    | (34084-50-9)    |
| 125 | 7-Aminonitrazepam                       | (4928-02-3)     |
| 126 | 7-Hydroxymitragynine                    | (174418-82-7)   |
| 127 | A-796.260                               | (895155-26-7)   |
| 128 | A-834.735                               | (895155-57-4)   |
| 129 | AB-005                                  | (895155-25-6)   |
| 130 | AB-CHMINACA                             | (1185887-21-1)  |
| 131 | AB-FUBINACA                             | (1185282-01-2)  |
| 132 | AB-FUBINACA metabolite                  | (1877243-60-1 ) |
| 133 | ABICA-5F                                | (na)            |
| 134 | AB-PINACA                               | (1445752-09-9 ) |
| 135 | AB-PINACA 5Cl                           | (1801552-02-2)  |
| 136 | AB-PINACA 5F                            | (na)            |
| 137 | AB-PINACA metabolite (amide hydrolysis) | (na)            |
| 138 | AB-Pinaca N-(5-OH-PENTYL) metabolite    | (na)            |
| 139 | Acebutolol                              | (37517-30-9)    |
| 140 | Aceclidine                              | (827-61-2)      |
| 141 | Acemetacin                              | (53164-05-9)    |
| 142 | Acepromazine                            | (61-00-7)       |
| 143 | Aceprometazine                          | (13461-01-3)    |
| 144 | Acetaminodantrolene                     | (41515-09-7)    |
| 145 | Acetazolamide                           | (59-66-5)       |
| 146 | Acetiamine                              | (28008-04-0)    |
| 147 | Acetildenafil                           | (831217-01-7)   |
| 148 | Acetyl-Fentanyl                         | (3258-84-2)     |
| 149 | Acetylwardenafil                        | (na)            |
| 150 | Aciclovir                               | (59277-89-3)    |
| 151 | Aconitine                               | (302-27-2)      |
| 152 | Acrivastine                             | (87848-99-5)    |
| 153 | Acrylfentanyl                           | (82003-75-6)    |
| 154 | Actinoquinol                            | (15301-40-3)    |
| 155 | ADB-5F                                  | (1838134-16-9)  |

|     |                                          |                        |
|-----|------------------------------------------|------------------------|
| 156 | ADB-CHMICA                               | (na)                   |
| 157 | ADB-Chminaca                             | (1185887-13-1)         |
| 158 | ADB-FUBINACA                             | (1445583-51-6)         |
| 159 | ADBICA                                   | (1445583-48-1)         |
| 160 | ADBICA-5F                                | (na)                   |
| 161 | ADB-PINACA                               | (1633766-73-0)         |
| 162 | ADB-PINACA-5F                            | (na)                   |
| 163 | Adenine                                  | (73-24-5)              |
| 164 | Adenosine                                | (58-61-7)              |
| 165 | Adinazolam                               | (37115-32-5)           |
| 166 | Adrenalone                               | (99-45-6)              |
| 167 | Agomelatine                              | (138112-76-2)          |
| 168 | AH-7921                                  | (55154-30-8)           |
| 169 | Ajmaline                                 | (4360-12-7)            |
| 170 | AKB48 (APINACA)                          | (1345973-53-6)         |
| 171 | AKB48 N-(5-hydroxypentyl) metabolite     | (1778734-77-2)         |
| 172 | AKB48-5F (5F-APINACA)                    | (1400742-13-3)         |
| 173 | Alfentanyl                               | (71195-58-9)           |
| 174 | Alimemazine. Trimeprazine                | (84-96-8)              |
| 175 | Aliskiren                                | (173334-57-1)          |
| 176 | Alizapride                               | (59338-93-1)           |
| 177 | Allylescaline                            | (39201-75-7)           |
| 178 | Almitrine                                | (27469-53-0)           |
| 179 | alpha-ET                                 | (2235-90-7)            |
| 180 | alpha-Hydroxy-Alprazolam                 | (37115-43-8)           |
| 181 | Alpha-methylfentanyl                     | (79704-88-4)           |
| 182 | ALPHA-PBP. alpha-Pyrrolidinobutiophenone | (13415-82-2)           |
| 183 | alpha-PEP                                | (na)                   |
| 184 | alpha-PHP                                | (13415-86-6)           |
| 185 | alpha-PMP                                | (na)                   |
| 186 | alpha-POP / PV9                          | (na)                   |
| 187 | alpha-PPP                                | (19134-50-0)           |
| 188 | Alpha-PVP                                | (14530-33-7)           |
| 189 | ALPHA-PVP metabolite                     | (1797986-63-0.CF3COOH) |
| 190 | alpha-PVT                                | (1400742-66-6)         |
| 191 | alpha-Pyrrolidinobutiophenone            | (13415-54-8)           |
| 192 | Alprazolam                               | (28981-97-7)           |
| 193 | Alprenolol                               | (13655-52-2)           |
| 194 | Alprostadile. Prostaglandin E1           | (745-65-3)             |
| 195 | Altretamine                              | (645-05-6)             |
| 196 | Alypin                                   | (963-07-5)             |

|     |                                 |                |
|-----|---------------------------------|----------------|
| 197 | AM 1241                         | (444912-48-5)  |
| 198 | AM-1220                         | (137642-54-7)  |
| 199 | AM-1220-Azepane                 | (1348081-04-8) |
| 200 | AM-1248                         | (335160-66-2)  |
| 201 | AM-2201                         | (335161-24-5)  |
| 202 | AM-2232                         | (335161-19-8)  |
| 203 | AM-2233                         | (444912-75-8)  |
| 204 | AM-694                          | (335161-03-0)  |
| 205 | Amantadine                      | (768-94-5)     |
| 206 | AMB                             | (na)           |
| 207 | AMB-5F                          | (1801552-03-3) |
| 208 | Ambroxol                        | (18683-91-5)   |
| 209 | Amfepramone                     | (134-80-5)     |
| 210 | Amidephrine                     | (3354-67-4)    |
| 211 | Amiloride                       | (2016-88-8)    |
| 212 | Aminogluthethimide              | (125-84-8)     |
| 213 | Aminophenazone. Amidopyrin      | (58-15-1)      |
| 214 | Aminopromazine                  | (58-37-7)      |
| 215 | Aminorex                        | (2207-50-3)    |
| 216 | Aminotadalafil                  | (385769-84-6)  |
| 217 | Amiodarone                      | (1951-25-3)    |
| 218 | Amisulpiride                    | (71675-85-9)   |
| 219 | Amitriptyline                   | (50-48-6)      |
| 220 | Amitriptylinoxide               | (4317-14-0)    |
| 221 | Amlodipine                      | (88150-42-9)   |
| 222 | Amobarbital                     | (57-43-2)      |
| 223 | Amorolfine                      | (78613-35-1)   |
| 224 | Amoxapine                       | (14028-44-5)   |
| 225 | Amphetamine                     | (300-62-9)     |
| 226 | Amrinone                        | (60719-84-8)   |
| 227 | AMT . Alpha-Methyltryptamine    | (299-26-3)     |
| 228 | Anabesine                       | (40774-73-0)   |
| 229 | Anatabine                       | (581-49-7)     |
| 230 | Antazoline                      | (91-75-8)      |
| 231 | APICA                           | (1345973-50-3) |
| 232 | Apixaban                        | (503612-47-3)  |
| 233 | Apophedrin (Phenylethanolamine) | (7568-93-6)    |
| 234 | Apraclonidin                    | (66711-21-5)   |
| 235 | Aprindine                       | (37640-71-4)   |
| 236 | Apronalide                      | (528-92-7)     |
| 237 | Arecoline                       | (63-75-2)      |

|     |                                    |                |
|-----|------------------------------------|----------------|
| 238 | Argatroban                         | (74863-84-6)   |
| 239 | Aripiprazole                       | (129722-12-9)  |
| 240 | Asenapine                          | (65576-45-6)   |
| 241 | Astemizole                         | (68844-77-9)   |
| 242 | Atenolol                           | (29122-68-7)   |
| 243 | Atomoxetine                        | (83015-26-3)   |
| 244 | Atorvastatin                       | (134523-00-5)  |
| 245 | Atropine                           | (51-55-8)      |
| 246 | Avanafil                           | (330784-47-9)  |
| 247 | Axeen (Proxabarbal. Proxibarbital) | (2537-29-3)    |
| 248 | Azacyclonol                        | (115-46-8)     |
| 249 | Azapropazone                       | (13539-59-8)   |
| 250 | Azatadine                          | (3964-81-6)    |
| 251 | Azelastine                         | (58581-89-8)   |
| 252 | Azithromycin                       | (83905-01-5)   |
| 253 | Baclofen                           | (1134-47-0)    |
| 254 | Bambuterol                         | (81732-65-2)   |
| 255 | Bamifylline                        | (2016-63-9)    |
| 256 | Bamipine                           | (4945-47-5)    |
| 257 | Barbital                           | (57-44-3)      |
| 258 | Barverin                           | (1639-79-8)    |
| 259 | BB-22                              | (1400742-42-8) |
| 260 | BDB                                | (42542-07-4)   |
| 261 | Beclamide                          | (501-68-8)     |
| 262 | Befunolol                          | (39552-01-7)   |
| 263 | Benactyzine                        | (302-40-9)     |
| 264 | Bendamustine                       | (16506-27-7)   |
| 265 | Bendroflumethiazide                | (73-48-3)      |
| 266 | Benodanil                          | (15310-01-7)   |
| 267 | Benorilate                         | (5003-48-5)    |
| 268 | Benperidol                         | (2062-84-2)    |
| 269 | Benproperine                       | (2156-27-6)    |
| 270 | Benzatropine                       | (86-13-5)      |
| 271 | Benzedrone                         | (1225617-75-3) |
| 272 | Benzethonium                       | (121-54-0)     |
| 273 | Benzocaine                         | (94-09-7)      |
| 274 | Benzoctamine                       | (17243-39-9)   |
| 275 | Benzododecinium                    | (139-07-1)     |
| 276 | Benzoxonium                        | (19379-90-9)   |
| 277 | Benzoylecgonine                    | (519-09-5)     |
| 278 | Benzthiazide                       | (91-33-8)      |

|     |                       |                      |
|-----|-----------------------|----------------------|
| 279 | Benzyl Sildenafil     | (na)                 |
| 280 | Benzylpiperazine. BZP | (2759-28-6)          |
| 281 | Betaxolol             | (63659-18-7)         |
| 282 | Bethanidine           | (55-73-2)            |
| 283 | Bezafibrate           | (41859-67-0)         |
| 284 | Bicalutamide          | (90357-06-5)         |
| 285 | Biotin                | (58-85-5)            |
| 286 | Biperidene            | (514-65-8)           |
| 287 | Bisacodyl             | (603-50-9)           |
| 288 | Bisoprolol            | (66722-44-9)         |
| 289 | Bitrex (Denatonium)   | (3734-33-6.benzoate) |
| 290 | bk-2C-B               | (807631-09-0)        |
| 291 | bk-MDDMA              | (109367-07-9)        |
| 292 | Boldenone             | (846-48-0)           |
| 293 | Bornaprine            | (20448-86-6)         |
| 294 | Brallobarbitol        | (561-86-4)           |
| 295 | Brodifacoum           | (56073-10-0)         |
| 296 | Bromadiolone          | (28772-56-7)         |
| 297 | Bromazepam            | (1812-30-2)          |
| 298 | Bromhexine            | (3572-43-8)          |
| 299 | Bromocriptine         | (25614-03-3)         |
| 300 | Bromodragonfly        | (502759-67-3)        |
| 301 | Bromperidol           | (10457-90-6)         |
| 302 | Brompheniramine       | (86-22-6)            |
| 303 | Bromural (Bromisoval) | (496-67-3)           |
| 304 | Brotizolam            | (57801-81-7)         |
| 305 | Brucine               | (357-57-3)           |
| 306 | Bucetin               | (1083-57-4)          |
| 307 | Budipine              | (57982-78-2)         |
| 308 | Bufexamac             | (2438-72-4)          |
| 309 | Bufotenin             | (487-93-4)           |
| 310 | Bulbocapnine          | (298-45-3)           |
| 311 | Bumetanide            | (28395-03-1)         |
| 312 | Bunitrolol            | (34915-68-9)         |
| 313 | Buphedrone            | (408332-79-6)        |
| 314 | Bupivacaine           | (38396-39-3)         |
| 315 | Bupranolol            | (14556-46-8)         |
| 316 | Buprenorphine         | (52485-79-7)         |
| 317 | Bupropion             | (34911-55-2)         |
| 318 | Buspirone             | (36505-84-7)         |
| 319 | Butaperazine          | (653-03-2)           |



|     |                            |               |
|-----|----------------------------|---------------|
| 320 | Butizide                   | (2043-38-1)   |
| 321 | Butorphanol                | (42408-82-2)  |
| 322 | Butoxycaine                | (3772-43-8)   |
| 323 | Butylone                   | (17762-90-2)  |
| 324 | Butylscopolamine           | (149-64-4.Br) |
| 325 | Butyryl Fentanyl           | (1169-70-6)   |
| 326 | CAF-3                      | (na)          |
| 327 | Cafaminol                  | (30924-31-3)  |
| 328 | Caffeine                   | (58-08-2)     |
| 329 | Calteridol                 | (121915-83-1) |
| 330 | Camfetamine                | (92499-19-9)  |
| 331 | Candesartan                | (139481-59-7) |
| 332 | Candesartan cilexetil      | (145040-37-5) |
| 333 | Cannabidiol                | (13956-29-1)  |
| 334 | Cannabinol                 | (521-35-7)    |
| 335 | Canrenone                  | (976-71-6)    |
| 336 | Caproylresorcinol          | (70807-24-8)  |
| 337 | Capsaicin                  | (404-86-4)    |
| 338 | Carazolol                  | (57775-29-8)  |
| 339 | Carbachol                  | (51-83-2)     |
| 340 | Carbamazepine              | (298-46-4)    |
| 341 | Carbamazepine-10.11-epoxid | (36507-30-9)  |
| 342 | Carbinoxamine              | (486-16-8)    |
| 343 | Carbodenafil               | (944241-52-5) |
| 344 | Carboxyibuprofen           | (15935-54-3)  |
| 345 | Carbutamide                | (339-43-5)    |
| 346 | Carbuterol                 | (34866-47-2)  |
| 347 | Carfentanyl                | (59708-52-0)  |
| 348 | Carisoprodol               | (78-44-4)     |
| 349 | Carteolol                  | (51781-06-7)  |
| 350 | Carticaine (Articaine)     | (23964-58-1)  |
| 351 | Carvedilol                 | (72956-09-3)  |
| 352 | Cathine                    | (492-39-7)    |
| 353 | Cathinone                  | (71031-15-7)  |
| 354 | CC-2201                    | (na)          |
| 355 | Celiprolol                 | (56980-93-9)  |
| 356 | Cerivastatin               | (145599-86-6) |
| 357 | Cetirizine                 | (83881-51-0)  |
| 358 | Chloramphenicol            | (56-75-7)     |
| 359 | Chlorazanyl                | (500-42-5)    |
| 360 | Chlorbenzoxamine           | (522-18-9)    |

|     |                      |                |
|-----|----------------------|----------------|
| 361 | Chlorcyclizine       | (82-93-9)      |
| 362 | Chlordiazepoxid      | (58-25-3)      |
| 363 | Chlormezanone        | (80-77-3)      |
| 364 | Chlorodenafil        | (1058653-74-9) |
| 365 | Chloropretadalafil   | (na)           |
| 366 | Chloropyramine       | (59-32-5)      |
| 367 | Chloroquine          | (54-05-7)      |
| 368 | Chlorphenethazine    | (2095-24-1)    |
| 369 | Chlorpheniramine     | (132-22-9)     |
| 370 | Chlorpromazine       | (50-53-3)      |
| 371 | Chlorpropamide       | (94-20-2)      |
| 372 | Chlorprotixene       | (113-59-7)     |
| 373 | Chlortalidone        | (77-36-1)      |
| 374 | Cilazapril           | (88768-40-5)   |
| 375 | Cimetidine           | (51481-61-9)   |
| 376 | Cinchocaine          | (85-79-0)      |
| 377 | Cinnamylidenafil     | (na)           |
| 378 | Cinnarizine          | (298-57-7)     |
| 379 | Cinoxacin            | (28657-80-9)   |
| 380 | Ciprofloxacin        | (85721-33-1)   |
| 381 | Cisapride            | (81098-60-4)   |
| 382 | Citalopram           | (59729-33-8)   |
| 383 | Clemastine           | (15686-51-8)   |
| 384 | Clenbuterol          | (37148-27-9)   |
| 385 | Clibucaine           | (15302-10-0)   |
| 386 | Clidinium (I+)       | (7020-55-5)    |
| 387 | Climbazole           | (38083-17-9)   |
| 388 | Clobazam             | (22316-47-8)   |
| 389 | Clobenzepam          | (1159-93-9)    |
| 390 | Clobenzorex          | (13364-32-4)   |
| 391 | Clobetasone butyrate | (25122-57-0)   |
| 392 | Clobutinol           | (14860-49-2)   |
| 393 | Clomethiazole        | (533-45-9)     |
| 394 | Clomipramine         | (303-49-1)     |
| 395 | Clonazepam           | (1622-61-3)    |
| 396 | Clonazolam           | (33887-02-4)   |
| 397 | Clonidine            | (4205-90-7)    |
| 398 | Clopamide            | (636-54-4)     |
| 399 | Clopenthixol         | (982-24-1)     |
| 400 | Clopidogrel          | (113665-84-2)  |
| 401 | Clothiapine          | (2058-52-8)    |

|     |                         |                     |
|-----|-------------------------|---------------------|
| 402 | Clotiazepam             | (33671-46-4)        |
| 403 | Clozapine               | (5786-21-0)         |
| 404 | Clozapine N-oxide       | (34233-69-7)        |
| 405 | Cocaethylene            | (529-38-4)          |
| 406 | Cocaine                 | (50-36-2)           |
| 407 | Codeine                 | (76-57-3)           |
| 408 | Colchicine              | (64-86-8)           |
| 409 | Corticosterone          | (50-22-6)           |
| 410 | Cortisone               | (53-06-5)           |
| 411 | Cotinine                | (486-56-6)          |
| 412 | Coumatetralyl           | (5836-29-3)         |
| 413 | CP 47-497               | (70434-82-1)        |
| 414 | CP 47-497-C8            | (70434-92-3)        |
| 415 | CP 55-940               | (83002-04-4)        |
| 416 | Croconazole             | (77175-51-0)        |
| 417 | Cumyl-PINACA            | (1400742-15-5)      |
| 418 | Cyamemazine             | (3546-03-0)         |
| 419 | Cyclamic acid           | (100-88-9)          |
| 420 | Cyclizine               | (82-92-8)           |
| 421 | Cyclobenzaprine         | (303-53-7)          |
| 422 | Cyclopentolate          | (512-15-2)          |
| 423 | Cyclopentynafil         | (na)                |
| 424 | Cyclovalone             | (579-23-7)          |
| 425 | Cyproheptadine          | (129-03-3)          |
| 426 | D2PM (diphenylprolinol) | (22348-32-9)        |
| 427 | D3-6-O-Acetylmorphine   | (136765-25-8)       |
| 428 | D3-Atropin              | (51-54-7)           |
| 429 | D3-Benzoylecgonine      | (115732-68-8)       |
| 430 | D3-Chlorpromazine       | (136765-28-1)       |
| 431 | D3-Cocaethylene         | (136765-30-5)       |
| 432 | D3-Cocaine              | (65266-73-1)        |
| 433 | D3-Codeine              | (70420-71-2)        |
| 434 | D3-Cotinine             | (110952-70-0)       |
| 435 | D3-Doxepin              | (347840-07-7.HCl)   |
| 436 | D3-Ecgoninemethylester  | (136765-34-9)       |
| 437 | D3-EDDP                 | (136765-23-6.HClO4) |
| 438 | D3-Hydromorphone        | (136765-37-2)       |
| 439 | D3-LSD                  | (136765-38-3)       |
| 440 | D3-Morphine             | (67293-88-3)        |
| 441 | D3-Oxycodone            | (160227-46-3)       |
| 442 | D3-Trimipramine         | (136765-54-3)       |

|     |                            |                |
|-----|----------------------------|----------------|
| 443 | D4-Clonazepam              | (170082-15-2)  |
| 444 | D4-Haloperidol             | (136765-35-0)  |
| 445 | D4-Lorazepam               | (84344-15-0)   |
| 446 | D4-Midazolam               | (na)           |
| 447 | D4-N-Desmethyflunitrazepam | (1397234-19-3) |
| 448 | D4-Nicotine                | (350818-69-8)  |
| 449 | D5-Amphetamine             | (136765-27-0)  |
| 450 | D5-Diazepam                | (65854-76-4)   |
| 451 | D5-Fentanyl                | (118357-29-2)  |
| 452 | D5-MBDB                    | (362043-98-9)  |
| 453 | D5-MDA                     | (136765-42-9)  |
| 454 | D5-MDEA                    | (160227-43-0)  |
| 455 | D5-MDMA                    | (136765-43-0)  |
| 456 | D5-Nordiazepam             | (65891-80-7)   |
| 457 | D5-Oxazepam                | (65854-78-6)   |
| 458 | D5-Temazepam               | (136765-51-0)  |
| 459 | D6-Dihydrocodeine          | (na)           |
| 460 | D6-Fluoxetine              | (na)           |
| 461 | D6-Zolpidem                | (959605-90-4)  |
| 462 | D7-7-Aminoflunitrazepam    | (879894-27-6)  |
| 463 | D7-Flunitrazepam           | (1286448-08-5) |
| 464 | D9-Heroin                  | (1338713-49-7) |
| 465 | D9-Methadone               | (1435933-74-6) |
| 466 | Dabigatran etexilate       | (211915-06-9)  |
| 467 | DALT                       | (60676-77-9)   |
| 468 | Dapiprazole                | (72822-12-9)   |
| 469 | Dapoxetine                 | (119356-77-3)  |
| 470 | Deacetyldiltiazem          | (42399-40-6)   |
| 471 | Debrisoquine               | (1131-64-2)    |
| 472 | Deflazacort                | (14484-47-0)   |
| 473 | Delorazepam                | (2894-67-9)    |
| 474 | Demeclocycline             | (127-33-3)     |
| 475 | Demoxepam                  | (963-39-3)     |
| 476 | Denaverine                 | (3579-62-2)    |
| 477 | Desalkylflurazepam         | (2886-65-9)    |
| 478 | Deschloroetizolam          | (40054-73-7)   |
| 479 | Deschloroketamine          | (4631-27-0)    |
| 480 | Desethylhydroxychloroquine | (4298-15-1)    |
| 481 | Desipramine                | (50-47-5)      |
| 482 | Desloratadine              | (100643-71-8)  |
| 483 | Desmethoxyyangonin         | (15345-89-8)   |

|     |                                          |                |
|-----|------------------------------------------|----------------|
| 484 | Desmethyl carbodenafil                   | (147676-79-7)  |
| 485 | Desmethyl-Chlordiazepoxide               | (7722-15-8)    |
| 486 | Desmethyldiazepam                        | (22316-55-8)   |
| 487 | Desmethyl-Mirtazapine                    | (61337-68-6)   |
| 488 | Desmethylnortriptyline                   | (4444-42-2)    |
| 489 | Desmethylpromazine                       | (2095-20-7)    |
| 490 | Desmethylsertraline                      | (87857-41-8)   |
| 491 | Desomorphine                             | (427-00-9)     |
| 492 | Desoxycortone 21-(3-phenylpropionate)    | (14007-50-2)   |
| 493 | Desoxycortone enantate                   | (64-85-7)      |
| 494 | DET                                      | (7558-72-7)    |
| 495 | Detajmium                                | (33774-52-6)   |
| 496 | Dexamethasone                            | (50-02-2)      |
| 497 | Dexfenfluramine                          | (3239-44-9)    |
| 498 | Dexmedetomidine                          | (113775-47-6)  |
| 499 | Dextromethorphan                         | (125-71-3)     |
| 500 | Dextropropoxyphene                       | (469-62-5)     |
| 501 | Dextrorphan. O-Desmethyldextromethorphan | (125-73-5)     |
| 502 | Diaveridine                              | (5355-16-8)    |
| 503 | Diazepam                                 | (439-14-5)     |
| 504 | Dibenzepin                               | (4498-32-2)    |
| 505 | Dibutylone (bk-MMBDB)                    | (802286-83-5)  |
| 506 | Diclazepam                               | (2894-68-0)    |
| 507 | Diclofenac                               | (15307-86-5)   |
| 508 | Dicycloverine                            | (77-19-0)      |
| 509 | Didesmethyl Sibutramine                  | (84467-54-9)   |
| 510 | Dienogest                                | (65928-58-7)   |
| 511 | Diethazine                               | (60-91-3)      |
| 512 | Diethylcarbamazine                       | (90-89-1)      |
| 513 | Digoxin                                  | (20830-75-5)   |
| 514 | Dihydrocodeine                           | (125-28-0)     |
| 515 | Dihydroergocristine                      | (17479-19-5)   |
| 516 | Dihydrokavain                            | (587-63-3)     |
| 517 | Dihydromethysticin                       | (19902-91-1)   |
| 518 | Dihydromorphine                          | (1421-28-9)    |
| 519 | Diltiazem                                | (42399-41-7)   |
| 520 | Dimethocain                              | (94-15-5)      |
| 521 | Dimethyl Acetildenafil                   | (1290041-88-1) |
| 522 | Dimethyl Sildenafil                      | (1416130-63-6) |
| 523 | Dimethylcathinone. Metamfepramone        | (15351-09-4)   |
| 524 | Dimetindene                              | (5636-83-9)    |

|     |                               |                   |
|-----|-------------------------------|-------------------|
| 525 | Dimetotiazine                 | (7456-24-8)       |
| 526 | Dimetridazole                 | (551-92-8)        |
| 527 | Dinortramadol                 | (na)              |
| 528 | Dioxethedrin                  | (497-75-6)        |
| 529 | Dioxohongdenafil              | (na)              |
| 530 | Diphenhydramine               | (58-73-1)         |
| 531 | Diphenidine                   | (36794-52-2)      |
| 532 | Diphenoxylate                 | (915-30-0)        |
| 533 | Diphenylpyraline              | (147-20-6)        |
| 534 | Diponium                      | (58875-33-5)      |
| 535 | Diprophylline                 | (479-18-5)        |
| 536 | DiPT                          | (14780-24-6)      |
| 537 | Dipyridamole                  | (58-32-2)         |
| 538 | Disopyramide                  | (3737-09-5)       |
| 539 | Dithio-desmethyl-carbodenafil | (na)              |
| 540 | Dixyrazine                    | (2470-73-7)       |
| 541 | DL-4-methylamphetamine        | (41632-56-8).HCl) |
| 542 | DMAA                          | (105-41-9)        |
| 543 | DMT . Dimethyltryptamine      | (61-50-7)         |
| 544 | DOB                           | (64638-07-9)      |
| 545 | Dobutamine                    | (34368-04-2)      |
| 546 | DOC                           | (123431-31-2)     |
| 547 | DOET                          | (22004-32-6)      |
| 548 | DOM                           | (15588-95-1)      |
| 549 | Domperidone                   | (57808-66-9)      |
| 550 | Donepezil                     | (120014-06-4)     |
| 551 | Dopexamine                    | (86197-47-9)      |
| 552 | Dorzolamide                   | (120279-96-1)     |
| 553 | Dosulepin                     | (113-53-1)        |
| 554 | Doxapram                      | (309-29-5)        |
| 555 | Doxepin                       | (1668-19-5)       |
| 556 | Doxylamine                    | (469-21-6)        |
| 557 | DPT                           | (61-52-9)         |
| 558 | Drazoxolon                    | (5707-69-7)       |
| 559 | Drofenine                     | (1679-76-1)       |
| 560 | Droperidol                    | (548-73-2)        |
| 561 | Dropropizine                  | (17692-31-8)      |
| 562 | Duloxetine                    | (116539-59-4)     |
| 563 | E-10-Hydroxyamitriptyline     | (64520-05-4)      |
| 564 | EAM-2201                      | (1364933-60-7)    |
| 565 | Ebastine                      | (90729-43-4)      |

|     |                       |                |
|-----|-----------------------|----------------|
| 566 | Ecgonine methyl ester | (7143-09-1)    |
| 567 | EDDP                  | (30223-73-5)   |
| 568 | Edoxaban              | (480449-70-5)  |
| 569 | EG-018                | (na)           |
| 570 | Embutramide           | (15687-14-6)   |
| 571 | Emepronium            | (3614-30-0)    |
| 572 | Enalapril             | (75847-73-3)   |
| 573 | Enoximon              | (77671-31-9)   |
| 574 | Entacapone            | (130929-57-6)  |
| 575 | Ephedrine             | (299-42-3)     |
| 576 | Eprosartan            | (133040-01-4)  |
| 577 | Ergotamine            | (113-15-5)     |
| 578 | Erythromycin          | (114-07-8)     |
| 579 | Esculin               | (531-75-9)     |
| 580 | Esmolol               | (103598-03-4)  |
| 581 | Esomeprazole          | (119141-88-7)  |
| 582 | Estazolam             | (29975-16-4)   |
| 583 | Etaqualone            | (7432-25-9)    |
| 584 | EtG. Ethylglucuronide | (17685-04-0)   |
| 585 | Ethambutol            | (74-55-5)      |
| 586 | Ethenzamide           | (938-73-8)     |
| 587 | Ethylcathinone        | (51553-17-4)   |
| 588 | Ethylmorphine         | (76-58-4)      |
| 589 | Ethylone              | (1112937-64-0) |
| 590 | Ethylphenidate        | (57413-43-1)   |
| 591 | Etilefrine            | (709-55-7)     |
| 592 | Etizolam              | (40054-69-1)   |
| 593 | Etodroxizine          | (17692-34-1)   |
| 594 | EtS                   | (540-82-9)     |
| 595 | Euthylone. bk-EBDB    | (802855-66-9)  |
| 596 | Exemestane            | (107868-30-4)  |
| 597 | FAB-144               | (na)           |
| 598 | Famotidine            | (76824-35-6)   |
| 599 | FDU-PB-22             | (na)           |
| 600 | Fedrilate             | (23271-74-1)   |
| 601 | Felodipine            | (72509-76-3)   |
| 602 | Fencamfamine          | (2240-14-4)    |
| 603 | Fendiline             | (13042-18-7)   |
| 604 | Fenethylline          | (3736-08-1)    |
| 605 | Fenfluramine          | (458-24-2)     |
| 606 | Fenofibrate           | (49562-28-9)   |

|     |                         |                |
|-----|-------------------------|----------------|
| 607 | Fenoterol               | (13392-18-2)   |
| 608 | Fenpipramide            | (77-01-0)      |
| 609 | Fenpiprane              | (3329-14-4)    |
| 610 | Fenproporex (NARL)      | (15686-61-0)   |
| 611 | Fentanyl                | (437-38-7)     |
| 612 | Fenticonazole           | (72479-26-6)   |
| 613 | Fexofenadine            | (83799-24-0)   |
| 614 | Flecainide              | (54143-55-4)   |
| 615 | Flibanserin             | (167933-07-5)  |
| 616 | Flocoumafen             | (90035-08-8)   |
| 617 | Floctafenine            | (23779-99-9)   |
| 618 | Fluanisone              | (1480-19-9)    |
| 619 | Flubromazepam           | (2647-50-9)    |
| 620 | Flubromazolam           | (612526-40-6)  |
| 621 | Fluconazole             | (86386-73-4)   |
| 622 | Fludrocortisone         | (514-36-3)     |
| 623 | Flumazenil              | (78755-81-4)   |
| 624 | Flunitrazepam           | (1622-62-4)    |
| 625 | Flunixin                | (38677-85-9)   |
| 626 | Fluoro methyl phenidate | (na)           |
| 627 | Fluoxetine              | (54910-89-3)   |
| 628 | Flupentixol             | (2709-56-0)    |
| 629 | Fluphenazine            | (69-23-8)      |
| 630 | Flupirtine              | (56995-20-1)   |
| 631 | Flurazepam              | (17617-23-1)   |
| 632 | Fluspirilen             | (1841-19-6)    |
| 633 | Fluvastatin             | (93957-54-1)   |
| 634 | Fluvoxamine             | (54739-18-3)   |
| 635 | Fosinopril              | (98048-97-6)   |
| 636 | Frovatriptan            | (158747-02-5)  |
| 637 | FUB-144                 | (na)           |
| 638 | FUB-AKB48               | (na)           |
| 639 | FUB-AMB                 | (na)           |
| 640 | FUBIMINA                | (na)           |
| 641 | FUB-PB-22               | (1800098-36-5) |
| 642 | Furanyl fentanyl        | (101345-66-8)  |
| 643 | Furazolidone            | (67-45-8)      |
| 644 | Gabapentin              | (60142-96-3)   |
| 645 | Galantamine             | (357-70-0)     |
| 646 | Gallopamil              | (16662-47-8)   |
| 647 | Gildenafil              | (147676-66-2)  |



|     |                             |                |
|-----|-----------------------------|----------------|
| 648 | GHB                         | (591-81-1)     |
| 649 | Glaphenine                  | (3820-67-5)    |
| 650 | Glibenclamide               | (10238-21-8)   |
| 651 | Glibornuride                | (26944-48-9)   |
| 652 | Glimepiride                 | (93479-97-1)   |
| 653 | Glipizide                   | (29094-61-9)   |
| 654 | Granisetron                 | (109889-09-0)  |
| 655 | Griseofulvin                | (126-07-8)     |
| 656 | Guaifenesin                 | (93-14-1)      |
| 657 | Guanabenz                   | (5051-62-7)    |
| 658 | Guanethidine                | (55-65-2)      |
| 659 | Guanoxan                    | (2165-19-7)    |
| 660 | Halcinonide                 | (3093-35-4)    |
| 661 | Haloperidol                 | (52-86-8)      |
| 662 | Haloxypol ethoxyethyl ester | (87237-48-7)   |
| 663 | Harmaline                   | (304-21-2)     |
| 664 | Harman                      | (486-84-0)     |
| 665 | Harmine                     | (442-51-3)     |
| 666 | Harpagoside                 | (19210-12-9)   |
| 667 | HDMP-28. Methyl-naphthidate | (231299-82-4)  |
| 668 | Heroin                      | (561-27-3)     |
| 669 | Hexobendine                 | (54-03-5)      |
| 670 | HHMA                        | (15398-87-5)   |
| 671 | Histamine                   | (51-45-6)      |
| 672 | Histapyrrodine              | (493-80-1)     |
| 673 | Histidine                   | (71-00-1)      |
| 674 | HMA                         | (na)           |
| 675 | HMMA                        | (117652-28-5)  |
| 676 | Homatropine                 | (87-00-3)      |
| 677 | Homofenazine                | (3833-99-6)    |
| 678 | HomoSildenafil              | (642928-07-2)  |
| 679 | Hordenine                   | (539-15-1)     |
| 680 | HTMPIPO-4                   | (1445751-38-1) |
| 681 | HU-210                      | (112830-95-2)  |
| 682 | Hydrochlorothiazide         | (58-93-5)      |
| 683 | Hydrocodone                 | (125-29-1)     |
| 684 | Hydrocortisone              | (850-23-7)     |
| 685 | Hydrocortisone 21-acetate   | (50-03-3)      |
| 686 | Hydromorphone               | (466-99-9)     |
| 687 | Hydroxy Acetildenafil       | (147676-56-0)  |
| 688 | Hydroxy Vardenafil          | (224785-98-2)  |

|     |                                                |                                          |
|-----|------------------------------------------------|------------------------------------------|
| 689 | Hydroxyalprazolam                              | (30896-57-2/4-OH or 37115-43-8/alpha-OH) |
| 690 | Hydroxybupropion (as (RS.RS)-cyclic Hemiketal) | (233600-52-7)                            |
| 691 | Hydroxychloroquine                             | (118-42-3)                               |
| 692 | Hydroxycotinine                                | (34834-67-8)                             |
| 693 | Hydroxyhomo Sildenafil                         | (139755-85-4)                            |
| 694 | Hydroxyquetiapine                              | (139079-39-3)                            |
| 695 | Hydroxythiohomo Sildenafil                     | (479073-82-0)                            |
| 696 | Hydroxyzine                                    | (68-88-2)                                |
| 697 | Ibogaine                                       | (83-74-9)                                |
| 698 | Ibuprofen                                      | (15687-27-1 )                            |
| 699 | Icariin                                        | (489-32-7)                               |
| 700 | Imipramine                                     | (50-49-7)                                |
| 701 | Indanazoline                                   | (40507-78-6)                             |
| 702 | Indapamide                                     | (26807-65-8)                             |
| 703 | Indinavir                                      | (150378-17-9)                            |
| 704 | Indomethacin                                   | (53-86-1)                                |
| 705 | Indoramin                                      | (26844-12-2)                             |
| 706 | Iopodic acid                                   | (5587-89-3)                              |
| 707 | Ipratropium                                    | (22254-24-6)                             |
| 708 | Iprindol                                       | (5560-72-5)                              |
| 709 | Irbesartan                                     | (138402-11-6)                            |
| 710 | Isoaminile                                     | (77-51-0)                                |
| 711 | Isoconazole                                    | (24168-96-5)                             |
| 712 | Iso-LSD                                        | (2126-78-5)                              |
| 713 | Isoniazide                                     | (54-85-3)                                |
| 714 | Isopropylphenidate                             | (93148-46-0)                             |
| 715 | Isothipendyl                                   | (482-15-5)                               |
| 716 | Isoxsuprine                                    | (395-28-8)                               |
| 717 | Isradipine                                     | (75695-93-1)                             |
| 718 | Ivabradine                                     | (155974-00-8)                            |
| 719 | JWH-007                                        | (155471-10-6)                            |
| 720 | JWH-015                                        | (155471-08-2)                            |
| 721 | JWH-018                                        | (209414-07-3)                            |
| 722 | JWH-018-1-Methyl-Hexyl                         | (155471-13-9)                            |
| 723 | JWH-018-6-Methoxy-Ind                          | (1427325-49-2)                           |
| 724 | JWH-018-Adamantoyl. AB-001                     | (1345973-49-0)                           |
| 725 | JWH-018-D9                                     | (JWH-018. 209414-07-3 )                  |
| 726 | JWH-018-M-2-OH-Ind                             | (1427325-32-3)                           |
| 727 | JWH-018-M-4-OH-Ind                             | (1307803-42-4)                           |

|     |                                          |                 |
|-----|------------------------------------------|-----------------|
| 728 | JWH-018-M-5-OH-Ind                       | (1307803-43-5)  |
| 729 | JWH-018-M-6-OH-Ind                       | (1307803-44-6)  |
| 730 | JWH-018-M-7-OH-Ind                       | (1307803-45-7)  |
| 731 | JWH-018-M-N-4-OH-Pentyl                  | (1320363-47-0)  |
| 732 | JWH-018-M-N-5-OH-Pentyl                  | (335161-21-2)   |
| 733 | JWH-018-M-N-Pentanoic acid               | (1254475-87-0)  |
| 734 | JWH-019                                  | (209414-08-4)   |
| 735 | JWH-019-(5-hydroxyindol) metabolite      | (1379604-70-2 ) |
| 736 | JWH-020                                  | (209414-09-5)   |
| 737 | JWH-022                                  | (209414-16-4)   |
| 738 | JWH-073                                  | (208987-48-8)   |
| 739 | JWH-073-2-Methyl                         | (na)            |
| 740 | JWH-073-3-Methyl                         | (na)            |
| 741 | JWH-073-M-2-OH-Ind                       | (1427325-54-9)  |
| 742 | JWH-073-M-3-OH-Butyl                     | (na)            |
| 743 | JWH-073-M-4-OH-Butyl                     | (335161-14-3)   |
| 744 | JWH-073-M-4-OH-Ind                       | (1307803-46-8)  |
| 745 | JWH-073-M-6-OH-Ind                       | (1307803-48-0)  |
| 746 | JWH-073-M-7-OH-Ind                       | (1307803-49-1)  |
| 747 | JWH-073-M-N-Butanoic acid                | (1307803-52-6)  |
| 748 | JWH-073-N-(3-hydroxybutyl) metabolite-D5 | (1413427-47-0 ) |
| 749 | JWH-081                                  | (210179-46-7)   |
| 750 | JWH-081-N-(5-hydroxypentyl) metabolite   | (1427325-66-3)  |
| 751 | JWH-122                                  | (619294-47-2)   |
| 752 | JWH-122-F-Pentyl                         | (1354631-24-5)  |
| 753 | JWH-122-M-N-5-OH-Pentyl                  | (1379604-68-8)  |
| 754 | JWH-147                                  | (914458-20-1)   |
| 755 | JWH-180                                  | (824959-87-7)   |
| 756 | JWH-200                                  | (103610-04-4)   |
| 757 | JWH-200-M-4-OH-Ind                       | (1427325-73-2)  |
| 758 | JWH-201                                  | (864445-47-6)   |
| 759 | JWH-203                                  | (864445-54-5)   |
| 760 | JWH-210                                  | (824959-81-1)   |
| 761 | JWH-210-N-(4-hydroxypentyl) metabolite   | (1427521-37-6 ) |
| 762 | JWH-250                                  | (864445-43-2)   |
| 763 | JWH-250-N-(4-hydroxypentyl) metabolite   | (1427521-38-7)  |
| 764 | JWH-251                                  | (864445-39-6)   |
| 765 | JWH-302                                  | (864445-45-4)   |
| 766 | JWH-307                                  | (914458-26-7)   |
| 767 | JWH-368                                  | (914458-31-4 )  |
| 768 | JWH-370                                  | (914458-22-3)   |

|     |                                        |                            |
|-----|----------------------------------------|----------------------------|
| 769 | JWH-387                                | (1366067-59-5)             |
| 770 | JWH-398                                | (1292765-18-4)             |
| 771 | JWH-398-N-(5-hydroxypentyl) metabolite | (1379604-69-9)             |
| 772 | JWH-412                                | (1364933-59-4)             |
| 773 | JWH-412-5F. F2201                      | (1391485-39-4)             |
| 774 | Kavain                                 | (500-64-1)                 |
| 775 | Ketamine                               | (6740-88-1)                |
| 776 | Ketazolam                              | (27223-35-4)               |
| 777 | Ketobemidone                           | (469-79-4)                 |
| 778 | Ketoprofen                             | (22071-15-4)               |
| 779 | Ketorolac                              | (74103-06-3)               |
| 780 | Ketotifen                              | (34580-13-7)               |
| 781 | Labetalol                              | (36894-69-6)               |
| 782 | Lacosamide                             | (175481-36-4. 175481-37-5) |
| 783 | Lamotrigine                            | (84057-84-1)               |
| 784 | Laudanosine                            | (2688-77-9)                |
| 785 | Leflunomide                            | (75706-12-6)               |
| 786 | Lercanidipine                          | (100427-26-7)              |
| 787 | Letrozole                              | (112809-51-5)              |
| 788 | Levamisole                             | (16595-80-5.HCl)           |
| 789 | Levetiracetam                          | (102767-28-2)              |
| 790 | Levobunolol                            | (47141-42-4)               |
| 791 | Levocabastine                          | (79516-68-0)               |
| 792 | Levodopa                               | (59-92-7)                  |
| 793 | Levomepromazine                        | (60-99-1)                  |
| 794 | Levomepromazinesulfoxide               | (7052-08-6)                |
| 795 | Levopropylhexedrine                    | (6192-97-8)                |
| 796 | Lidocaine                              | (137-58-6)                 |
| 797 | Linagliptin                            | (668270-12-0)              |
| 798 | Lisinopril                             | (83915-83-7)               |
| 799 | Lisuride                               | (18016-80-3)               |
| 800 | Lofepramine                            | (23047-25-8)               |
| 801 | Lofexidine                             | (21498-08-8.HCl)           |
| 802 | Lonazolac                              | (53808-88-1)               |
| 803 | Loperamide                             | (53179-11-6)               |
| 804 | Lopinavir                              | (192725-17-0)              |
| 805 | Loprazolam                             | (61197-73-7)               |
| 806 | Loratadine                             | (79794-75-5)               |
| 807 | Lorazepam                              | (846-49-1)                 |
| 808 | Lormetazepam                           | (848-75-9)                 |
| 809 | Losartan                               | (114798-26-4)              |

|     |                                     |                 |
|-----|-------------------------------------|-----------------|
| 810 | Losartan Carboxylic Acid (EXP-3174) | (124750-92-1 )  |
| 811 | Lovastatin                          | (75330-75-5)    |
| 812 | Loxapine                            | (1977-10-2)     |
| 813 | LSD                                 | (50-37-3)       |
| 814 | Lurasidone                          | (367514-87-2)   |
| 815 | M-144                               | (na)            |
| 816 | MAB-CHMINACA                        | (na)            |
| 817 | MA-CHMINACA                         | (na)            |
| 818 | Malathion                           | (121-75-5)      |
| 819 | MAM-2201                            | (1354631-24-5 ) |
| 820 | MAM2201 N-pentanoic acid metabolite | (1537889-09-0)  |
| 821 | Maprotiline                         | (10262-69-8)    |
| 822 | Mazindol                            | (22232-71-9)    |
| 823 | MBDB                                | (103818-46-8)   |
| 824 | m-CPP                               | (6640-24-0)     |
| 825 | MDA                                 | (4764-17-4)     |
| 826 | MDAI                                | (132741-81-2)   |
| 827 | MDAT                                | (101625-35-8)   |
| 828 | MDDMA                               | (74698-50-3)    |
| 829 | MDEA                                | (82801-81-8)    |
| 830 | MDMA                                | (42542-10-9)    |
| 831 | MDMB-CHMINACA                       | (1185888-32-7)  |
| 832 | MDMB-FUBINACA                       | (na)            |
| 833 | MDPBP                               | (24622-60-4)    |
| 834 | MDPHP                               | (24622-61-5 )   |
| 835 | MDPPP                               | (24698-57-5)    |
| 836 | MDPV                                | (687603-66-3)   |
| 837 | Mebeverine                          | (3625-06-7)     |
| 838 | Mebroqualone                        | (4260-20-2)     |
| 839 | Meclofenamic acid                   | (644-62-2)      |
| 840 | Meclonazepam                        | (58662-84-3)    |
| 841 | Meclozine                           | (569-65-3)      |
| 842 | Medazepam                           | (2898-12-6)     |
| 843 | Mefenamic acid                      | (61-68-7)       |
| 844 | Mefenorex                           | (17243-57-1)    |
| 845 | Mefexamide                          | (1227-61-8)     |
| 846 | Mefloquine                          | (53230-10-7)    |
| 847 | Mefruside                           | (7195-27-9)     |
| 848 | Meftetramine                        | (403860-66-2)   |
| 849 | Melatonin                           | (73-31-4)       |
| 850 | Melitracen                          | (5118-29-6)     |

|     |                                 |                |
|-----|---------------------------------|----------------|
| 851 | Meloxicam                       | (71125-38-7)   |
| 852 | Melperone                       | (3575-80-2)    |
| 853 | Melphalan                       | (148-82-3)     |
| 854 | Memantine                       | (19982-08-2)   |
| 855 | Mephedrone                      | (1189805-46-6) |
| 856 | Mepindolol                      | (23694-81-7)   |
| 857 | Mepirapim                       | (na)           |
| 858 | Mepivacaine                     | (96-88-8)      |
| 859 | Meproamate                      | (57-53-4)      |
| 860 | Meptazinol                      | (54340-58-8)   |
| 861 | Mepyramine. Pyrillamine. Bromth | (91-84-9)      |
| 862 | Mequitazine                     | (29216-28-2)   |
| 863 | Mescaline                       | (54-04-6)      |
| 864 | Mesoridazine                    | (5588-33-0)    |
| 865 | Metaclazepam                    | (65517-27-3)   |
| 866 | Metamizole (Dipyrone)           | (68-89-3)      |
| 867 | Metenolone acetate              | (434-05-9)     |
| 868 | Metformin                       | (657-24-9)     |
| 869 | Methadone                       | (76-99-3)      |
| 870 | Methamphetamine                 | (537-46-2)     |
| 871 | Methanthelinium                 | (53-46-3)      |
| 872 | Methaphenilene                  | (493-78-7)     |
| 873 | Methaqualone                    | (72-44-6)      |
| 874 | Methazolamide                   | (554-57-4)     |
| 875 | Methcathinone                   | (5650-44-2)    |
| 876 | Methedrone. 4MeOMC              | (530-54-1)     |
| 877 | Methfuroxam                     | (28730-17-8)   |
| 878 | Methiopropamine                 | (7464-94-0)    |
| 879 | Methocarbamol                   | (532-03-6)     |
| 880 | Methohexital                    | (151-83-7)     |
| 881 | Methoprotlyne                   | (841-06-5)     |
| 882 | Methotrexate                    | (59-05-2)      |
| 883 | Methoxetamine. MXE              | (1239943-76-0) |
| 884 | Methoxyphenamine                | (93-30-1)      |
| 885 | Methoxypiperamide               | (na)           |
| 886 | Methylephedrine                 | (552-79-4)     |
| 887 | Methylergometrine               | (113-42-8)     |
| 888 | Methylone (MDMC)                | (186028-79-5)  |
| 889 | Methylphenidate                 | (113-45-1)     |
| 890 | Methylscopolamine               | (155-41-9)     |
| 891 | Methylsynphrine                 | (na)           |

|     |                               |                |
|-----|-------------------------------|----------------|
| 892 | Methysergide                  | (361-37-5)     |
| 893 | Methysticin                   | (495-85-2)     |
| 894 | Metipranolol                  | (22664-55-7)   |
| 895 | Metixene                      | (4969-02-2)    |
| 896 | Metizolam (Desmethyletizolam) | (40054-68-0)   |
| 897 | Metoclopramide                | (364-62-5)     |
| 898 | Metolazone                    | (17560-51-9)   |
| 899 | Metoprolol                    | (37350-58-6)   |
| 900 | Metronidazole                 | (443-48-1)     |
| 901 | Metsulfuron-methyl            | (74223-64-6)   |
| 902 | Metyrapone                    | (54-36-4)      |
| 903 | Mexedrone                     | (na)           |
| 904 | Mexiletine                    | (31828-71-4)   |
| 905 | Mianserine                    | (24219-97-4)   |
| 906 | Mianserine-N-oxide            | (62510-46-7)   |
| 907 | Miconazole                    | (22916-47-8)   |
| 908 | Midazolam                     | (59467-70-8)   |
| 909 | Milnacipran                   | (92623-85-3)   |
| 910 | Minocycline                   | (10118-90-8)   |
| 911 | Minoxidil                     | (38304-91-5)   |
| 912 | Mirodenafil                   | (862189-95-5)  |
| 913 | Mirtazapine                   | (61337-67-5)   |
| 914 | Mitragyna alkaloid            | (na)           |
| 915 | Mitragynine                   | (4098-40-2)    |
| 916 | MIZOLASTINE                   | (108612-45-9)  |
| 917 | MMB-2201 (AMB-PICA-5F)        | (1616253-26-9) |
| 918 | MMB-CHMINACA. MDMB-CHMICA     | (1971007-95-0) |
| 919 | MN-18                         | (1391484-80-2) |
| 920 | MN-25                         | (501926-82-5)  |
| 921 | Moclobemide                   | (71320-77-9)   |
| 922 | Modafinil                     | (68693-11-8)   |
| 923 | Molindone                     | (7416-34-4)    |
| 924 | Moperone                      | (1050-79-9)    |
| 925 | Morphine                      | (57-27-2)      |
| 926 | Morphine-3-beta-D-glucuronide | (20290-09-9)   |
| 927 | Morphine-6-beta-D-glucuronide | (50444-03-6)   |
| 928 | Moxaverine                    | (10539-19-2)   |
| 929 | Moxisylyte                    | (54-32-0)      |
| 930 | Moxonidine                    | (75438-57-2)   |
| 931 | MPPH                          | (34138-58-4)   |
| 932 | MPPP (3-desmethylprodine)     | (13147-09-6)   |

|     |                                           |                  |
|-----|-------------------------------------------|------------------|
| 933 | MT-45                                     | (57314-55-3.HCl) |
| 934 | N-(3-Methylbenzyl)piperazine              | (5321-48-2)      |
| 935 | N.N-Diethyl-m-toluamide. DEET             | (134-62-3)       |
| 936 | N.N-Diisobutyltryptamine                  | (15741-78-3)     |
| 937 | Nabumetone                                | (42924-53-8)     |
| 938 | Nadolol                                   | (42200-33-9)     |
| 939 | Naftidrofuryl                             | (31329-57-4)     |
| 940 | Naftifine                                 | (65472-88-0)     |
| 941 | Nalbuphine                                | (20594-83-6)     |
| 942 | Nalidixic acid                            | (389-08-2)       |
| 943 | Nalmefene                                 | (55096-26-9)     |
| 944 | Nalorphine                                | (62-67-9)        |
| 945 | Naloxone                                  | (465-65-6)       |
| 946 | Naltrexone                                | (16590-41-3)     |
| 947 | Nandrolone                                | (434-22-0)       |
| 948 | Nandrolone phenylpropionate               | (62-90-8)        |
| 949 | Naphazoline                               | (835-31-4)       |
| 950 | Naphyrone                                 | (850352-53-3)    |
| 951 | Naproxen                                  | (22204-53-1)     |
| 952 | Nateglinide                               | (105816-04-4)    |
| 953 | n-Butyl Tadalafil                         | (171596-31-9)    |
| 954 | n-Desmethyl Sildenafil                    | (139755-82-1)    |
| 955 | N-Desmethyflunitrazepam. Norflunitrazepam | (2558-30-7)      |
| 956 | N-Desmethyloanzapine                      | (161696-76-0)    |
| 957 | N-Desmethylpropafenone                    | (86383-21-3)     |
| 958 | N-Desmethyltapentadol                     | (1300037-83-5)   |
| 959 | Nebivolol                                 | (99200-09-6)     |
| 960 | NE-CHMIMO                                 | (na)             |
| 961 | Nefazodone                                | (83366-66-9)     |
| 962 | Nefopam                                   | (13669-70-0)     |
| 963 | Neostigmine                               | (59-99-4)        |
| 964 | N-Ethylamphetamine                        | (457-87-4)       |
| 965 | N-Ethylbuphedrone                         | (1354631-28-9)   |
| 966 | Nicardipine                               | (55985-32-5)     |
| 967 | Nicotinamide                              | (98-92-0)        |
| 968 | Nicotine                                  | (54-11-5)        |
| 969 | Nifedipine                                | (21829-25-4)     |
| 970 | Nifenazone                                | (2139-47-1)      |
| 971 | Niflumic acid                             | (4394-00-7)      |
| 972 | Nifoxipam                                 | (74723-10-7)     |
| 973 | Nikethamide                               | (59-26-7)        |



|      |                                            |                                         |
|------|--------------------------------------------|-----------------------------------------|
| 974  | Nilvadipine                                | (75530-68-6)                            |
| 975  | Nimetazepam                                | (2011-67-8)                             |
| 976  | Nimorazole                                 | (6506-37-2)                             |
| 977  | Nisoldipine                                | (63675-72-9)                            |
| 978  | N-Isopropylsalicylamide                    | (551-35-9)                              |
| 979  | Nitrazepam                                 | (146-22-5)                              |
| 980  | Nitrazolam                                 | (28910-99-8)                            |
| 981  | Nizatidine                                 | (76963-41-2)                            |
| 982  | NM-2201                                    | (na)                                    |
| 983  | NM-2-AI                                    | (24445-44-1)                            |
| 984  | N-MBZP                                     | (na)                                    |
| 985  | N-Methyl Pregabalin                        | (1155843-61-0)                          |
| 986  | NMT                                        | (61-49-4)                               |
| 987  | NNEI                                       | (1338925-11-3)                          |
| 988  | NNEI-5Cl                                   | (na)                                    |
| 989  | NNEI-5F                                    | (1445580-60-8)                          |
| 990  | Nomifensine                                | (24526-64-5)                            |
| 991  | NorAcetildenafil                           | (949091-38-7)                           |
| 992  | Norbuprenorphine                           | (78715-23-8)                            |
| 993  | Norchlorprothixene                         | (51382-91-3)                            |
| 994  | Norcitalopram                              | (144025-14-9)                           |
| 995  | Norclomipramine                            | (303-48-0)                              |
| 996  | Norclozapine                               | (6104-71-8)                             |
| 997  | Norcocaine                                 | (18717-72-1)                            |
| 998  | Norcodeine                                 | (467-15-2)                              |
| 999  | Nordextropropoxyphene                      | (3376-94-1)                             |
| 1000 | Nordiazepam                                | (1088-11-5)                             |
| 1001 | Nordiltiazem                               | (na)                                    |
| 1002 | Nordoxepin                                 | (1225-56-5)                             |
| 1003 | Norephedrine (Cathin. Phenylpropanolamine) | (14838-15-4)                            |
| 1004 | Norethisterone                             | (68-22-4)                               |
| 1005 | Norethisterone acetate                     | (51-98-9)                               |
| 1006 | Norfenefrine                               | (536-21-0)                              |
| 1007 | Norfentanyl                                | (1609-66-1)                             |
| 1008 | Norfloxacin                                | (70458-96-7)                            |
| 1009 | Norfluoxetine                              | (56161-73-0)                            |
| 1010 | Norketamine                                | (35211-10-0)                            |
| 1011 | Norlevomepromazine                         | (61733-92-4. HCl)                       |
| 1012 | Nor-LSD.Nor-iso-LSD                        | (35779-43-2 nor-LSD. Nor-iso-LSD<br>na) |
| 1013 | Normephedrone                              | (31952-47-3)                            |

|      |                                        |                        |
|------|----------------------------------------|------------------------|
| 1014 | Normethadone                           | (467-85-6)             |
| 1015 | Normianserine                          | (71936-92-0)           |
| 1016 | Normorphine                            | (466-97-7)             |
| 1017 | Norneosildenafil                       | (371959-09-0)          |
| 1018 | Nororphenadrine. Tofenacin. Elamol     | (15301-93-6)           |
| 1019 | Noroxycodone                           | (57664-96-7)           |
| 1020 | Norsibutramine                         | (na)                   |
| 1021 | Norsildenafil                          | (na)                   |
| 1022 | NorTadalafil                           | (171596-36-4)          |
| 1023 | Nortetrazepam                          | (10379-11-0)           |
| 1024 | Nortilidine                            | (38677-94-0)           |
| 1025 | Nortramadol                            | (75377-45-6)           |
| 1026 | Nortrimipramine                        | (2293-21-2)            |
| 1027 | Nortriptyline                          | (72-69-5)              |
| 1028 | Norvenlafaxine                         | (149289-30-5)          |
| 1029 | Norverapamil                           | (67018-85-3)           |
| 1030 | Noscapine                              | (128-62-1)             |
| 1031 | NPB-22                                 | (1445579-61-2)         |
| 1032 | NPB-22-5F                              | (1445579-79-2)         |
| 1033 | N-Propylamphetamine                    | (51799-32-7)           |
| 1034 | Nuarimol                               | (63284-71-9)           |
| 1035 | Obidoxime                              | (7683-36-5)            |
| 1036 | Ocfentanil                             | (101343-69-5)          |
| 1037 | oCp (1-2 chloropiperazine)             | (41202-32-8)(oCPP HCl) |
| 1038 | O-Desmethyldinortramadol               | (na)                   |
| 1039 | O-Desmethylnortramadol                 | (na)                   |
| 1040 | O-Desmethylsulpiride                   | (67381-52-6)           |
| 1041 | O-Desmethylnortramadol                 | (73986-53-5)           |
| 1042 | O-Desmethylvenlafaxine. Desvenlafaxine | (93413-62-8)           |
| 1043 | Ofloxacin                              | (82419-36-1)           |
| 1044 | Olanzapine                             | (132539-06-1)          |
| 1045 | Olsalazine                             | (15772-48-2)           |
| 1046 | Omeprazole                             | (73590-58-6)           |
| 1047 | Ondansetron                            | (99614-02-5)           |
| 1048 | Opipramol                              | (909-39-7)             |
| 1049 | ORG 27569                              | (868273-06-7)          |
| 1050 | Orlistat                               | (96829-58-2)           |
| 1051 | Ornidazole                             | (16773-42-5)           |
| 1052 | Orphenadrine                           | (83-98-7)              |
| 1053 | Oseltamivir                            | (196618-13-0)          |
| 1054 | Oxatomide                              | (60607-34-3)           |

|      |                                      |                |
|------|--------------------------------------|----------------|
| 1055 | Oxazepam                             | (604-75-1)     |
| 1056 | Oxcarbazepine                        | (28721-07-5)   |
| 1057 | Oxeladin                             | (468-61-1)     |
| 1058 | Oxetacaine                           | (126-27-2)     |
| 1059 | Oxitropium                           | (30286-75-0)   |
| 1060 | Oxohongdenafil                       | (na)           |
| 1061 | Oxomemazine                          | (3689-50-7)    |
| 1062 | Oxprenolol                           | (6452-71-7)    |
| 1063 | Oxybuprocaine                        | (99-43-4)      |
| 1064 | Oxybutynin                           | (5633-20-5)    |
| 1065 | Oxycodone                            | (76-42-6)      |
| 1066 | Oxyfedrine                           | (15687-41-9)   |
| 1067 | Oxymetazoline                        | (1491-59-4)    |
| 1068 | Oxymorphone                          | (76-41-5)      |
| 1069 | Oxymorphone-D3                       | (145225-03-2)  |
| 1070 | Oxypendyl                            | (17297-82-4)   |
| 1071 | Oxypertine                           | (153-87-7)     |
| 1072 | Oxyphencyclimine                     | (125-53-1)     |
| 1073 | Oxytetracycline                      | (79-57-2)      |
| 1074 | Paliperidone (9-OH-Risperidone)      | (144598-75-4)  |
| 1075 | Pantoprazole                         | (102625-70-7)  |
| 1076 | Papaverine                           | (58-74-2)      |
| 1077 | Paracetamol                          | (103-90-2)     |
| 1078 | Para-fluorofentanyl                  | (90736-23-5)   |
| 1079 | Paroxetine                           | (61869-08-7)   |
| 1080 | Paynantheine (Mitragyna alkaloid)    | (23496-41-5)   |
| 1081 | PB-22                                | (1400742-17-7) |
| 1082 | PB-22 3-carboxyindole metabolite     | (727421-73-0 ) |
| 1083 | PB-22 N-(5-hydroxypentyl) metabolite | (na)           |
| 1084 | PCN-5F                               | (na)           |
| 1085 | Pemoline                             | (2152-34-3)    |
| 1086 | Penbutolol                           | (38363-40-5)   |
| 1087 | Penfluridol                          | (26864-56-2)   |
| 1088 | Pentazocine                          | (359-83-1)     |
| 1089 | Pentedrone                           | (879722-57-3)  |
| 1090 | Pentifylline                         | (1028-33-7)    |
| 1091 | Pentobarbital                        | (76-74-4)      |
| 1092 | Pentoxifylline                       | (6493-05-6)    |
| 1093 | Pentoxyverine                        | (77-23-6)      |
| 1094 | Pentylone                            | (698963-77-8)  |
| 1095 | Perazine                             | (84-97-9)      |

|      |                          |               |
|------|--------------------------|---------------|
| 1096 | Pergolide                | (66104-22-1)  |
| 1097 | Periciazine              | (2622-26-6)   |
| 1098 | Perphenazine             | (58-39-9)     |
| 1099 | Pethidine                | (57-42-1)     |
| 1100 | p-FBF                    | (244195-31-1) |
| 1101 | Phenacetin               | (62-44-2)     |
| 1102 | Phenazepam               | (51753-57-2)  |
| 1103 | Phenazocine              | (127-35-5)    |
| 1104 | Phenazone                | (60-80-0)     |
| 1105 | Phenazopyridine          | (94-78-0)     |
| 1106 | Phencyclidine            | (77-10-1)     |
| 1107 | Phendimetrazine          | (634-03-7 )   |
| 1108 | Phenformin               | (114-86-3)    |
| 1109 | Pheniramine              | (86-21-5)     |
| 1110 | Phenmetrazine            | (134-49-6)    |
| 1111 | Phenobarbital            | (50-06-6)     |
| 1112 | Phenolphthalein          | (77-09-8)     |
| 1113 | Phenprocoumon            | (435-97-2)    |
| 1114 | Phentermine              | (122-09-8)    |
| 1115 | Phentolamine             | (50-60-2)     |
| 1116 | Phenylbutazone           | (50-33-9)     |
| 1117 | Phenylephrine            | (59-42-7)     |
| 1118 | Phenylpiracetam          | (77472-70-9 ) |
| 1119 | Phenyltoloxamine         | (92-12-6)     |
| 1120 | Phenytoin                | (57-41-0)     |
| 1121 | Pholcodine               | (509-67-1)    |
| 1122 | Pholedrine               | (370-14-9)    |
| 1123 | Phthalylsulfathiazole    | (85-73-4)     |
| 1124 | P-hydroxyamphetamine     | (1518-86-1)   |
| 1125 | P-Hydroxymesocarb        | (72460-70-9)  |
| 1126 | P-Hydroxymethamphetamine | (6114-26-7)   |
| 1127 | Physostigmine            | (57-47-6)     |
| 1128 | Pilocarpine              | (92-13-7)     |
| 1129 | Pimozide                 | (2062-78-4)   |
| 1130 | Pindolol                 | (13523-86-9)  |
| 1131 | Pioglitazone             | (111025-46-8) |
| 1132 | Pipamperone              | (1893-33-0)   |
| 1133 | Piperiacetildenafil      | (147676-50-4) |
| 1134 | Pipotiazine              | (39860-99-6)  |
| 1135 | Pipradrol                | (467-60-7)    |
| 1136 | Piprozolin               | (17243-64-0)  |

|      |                          |                     |
|------|--------------------------|---------------------|
| 1137 | Piracetam                | (7491-74-9)         |
| 1138 | Pirenzepine              | (28797-61-7)        |
| 1139 | Piretanide               | (55837-27-9)        |
| 1140 | Piritramide              | (302-41-0)          |
| 1141 | Pirmenol                 | (68252-19-7)        |
| 1142 | Piroxicam                | (36322-90-4)        |
| 1143 | Pitofenone               | (54063-52-4)        |
| 1144 | Pizotifen                | (15574-96-6)        |
| 1145 | PMA                      | (64-13-1)           |
| 1146 | PMMA                     | (3398-68-3)         |
| 1147 | Practolol                | (6673-35-4)         |
| 1148 | Prajmaline               | (35080-11-6)        |
| 1149 | Pramipexole              | (104632-26-0)       |
| 1150 | Pravadoline. WIN-48-098  | (92623-83-1)        |
| 1151 | Prazepam                 | (2955-38-6)         |
| 1152 | Prazosin                 | (19216-56-9)        |
| 1153 | Prednisolone             | (50-24-8)           |
| 1154 | Prednisone               | (53-03-2)           |
| 1155 | Pregabalin               | (148553-50-8)       |
| 1156 | Prenylamine              | (390-64-7)          |
| 1157 | Prilocaine               | (721-50-6)          |
| 1158 | Primaquine               | (90-34-6)           |
| 1159 | Primidone                | (125-33-7)          |
| 1160 | Proadifen                | (302-33-0)          |
| 1161 | Procainamide             | (51-06-9)           |
| 1162 | Procaine                 | (59-46-1)           |
| 1163 | Prochlorperazine         | (58-38-8)           |
| 1164 | Procyclidine             | (77-37-2)           |
| 1165 | Progesterone             | (57-83-0)           |
| 1166 | Proguanil                | (500-92-5)          |
| 1167 | Prolintane               | (493-92-5)          |
| 1168 | Promazine                | (58-40-2)           |
| 1169 | Promethazine             | (60-87-7)           |
| 1170 | Prometryn                | (7287-19-6)         |
| 1171 | Propafenone              | (54063-53-5)        |
| 1172 | Propantheline            | (50-34-0. 298-50-0) |
| 1173 | Propiconazole            | (60207-90-1)        |
| 1174 | Propionylpromazine       | (3568-24-9)         |
| 1175 | Propipocaine             | (3670-68-6)         |
| 1176 | Propiverine              | (60569-19-9)        |
| 1177 | Propoxyphenyl sildenafil | (877777-10-1)       |

|      |                                         |                   |
|------|-----------------------------------------|-------------------|
| 1178 | Propoxyphenyl-Thiohydroxyhomosildenafil | (479073-90-0)     |
| 1179 | Propranolol                             | (525-66-6)        |
| 1180 | Propyphenazone                          | (479-92-5)        |
| 1181 | Proquazone                              | (22760-18-5)      |
| 1182 | Prothipendyl                            | (303-69-5)        |
| 1183 | Protionamide                            | (14222-60-7)      |
| 1184 | Protriptyline                           | (438-60-8)        |
| 1185 | Proxiphylline                           | (603-00-9)        |
| 1186 | Pseudoephedrine                         | (90-82-4)         |
| 1187 | PseudoVardenafil                        | (224788-34-5)     |
| 1188 | Psilocin                                | (520-53-6)        |
| 1189 | PV8. alpha-PHP                          | (13415-55-9 .HCl) |
| 1190 | PX-1                                    | (na)              |
| 1191 | PX-2                                    | (na)              |
| 1192 | Pyranocoumarin                          | (518-20-7)        |
| 1193 | Pyrazolam                               | (39243-02-2)      |
| 1194 | Pyribenzamine (Tripelenamine. Azaron)   | (91-81-6)         |
| 1195 | Pyridoxine                              | (65-23-6)         |
| 1196 | Pyrimethamine                           | (58-14-0)         |
| 1197 | Pyritinol                               | (1098-97-1)       |
| 1198 | Pyrovalerone                            | (3563-49-3)       |
| 1199 | Pyrvinium                               | (548-84-5)        |
| 1200 | Quetiapine                              | (111974-69-7)     |
| 1201 | Quinagolide                             | (87056-78-8)      |
| 1202 | Quinapril                               | (85441-61-8)      |
| 1203 | Quinidine                               | (56-54-2)         |
| 1204 | Quinine                                 | (130-95-0)        |
| 1205 | Ramifenazone                            | (3615-24-5)       |
| 1206 | Ramipril                                | (87333-19-5)      |
| 1207 | Ranitidine                              | (66357-35-5)      |
| 1208 | Rasagiline                              | (136236-51-6)     |
| 1209 | Raubasine                               | (483-04-5)        |
| 1210 | RCS-4                                   | (1345966-78-0)    |
| 1211 | RCS-4-M-5-COOH-Pentyl                   | (1427521-39-8)    |
| 1212 | RCS-4-M-5-OH-Pentyl                     | (1379604-66-6)    |
| 1213 | RCS-4-ortho                             | (1345966-76-8)    |
| 1214 | RCS-8                                   | (1345970-42-4)    |
| 1215 | Reboxetine                              | (98769-81-4)      |
| 1216 | Remifentanyl                            | (132875-61-7)     |
| 1217 | Remoxipride                             | (117591-79-4)     |
| 1218 | Repaglinide                             | (135062-02-1)     |

|      |                                      |                |
|------|--------------------------------------|----------------|
| 1219 | Reproterol                           | (54063-54-6)   |
| 1220 | Reserpine                            | (50-55-5)      |
| 1221 | RH-34                                | (1028307-48-3) |
| 1222 | Riluzole                             | (1744-22-5)    |
| 1223 | Rimonabant                           | (168273-06-1)  |
| 1224 | Risperidone                          | (106266-06-2)  |
| 1225 | Ritalinic acid                       | (19395-41-6)   |
| 1226 | Ritodrine                            | (26652-09-5)   |
| 1227 | Ritonavir                            | (155213-67-5)  |
| 1228 | Rivaroxaban                          | (366789-02-8)  |
| 1229 | Rivastigmine                         | (123441-03-2)  |
| 1230 | Rizatriptan                          | (145202-66-0)  |
| 1231 | Rocuronium                           | (119302-91-9)  |
| 1232 | Ropinirole                           | (91374-21-9)   |
| 1233 | Ropivacaine                          | (84057-95-4)   |
| 1234 | Rosiglitazone                        | (122320-73-4)  |
| 1235 | Rosuvastatin                         | (287714-41-4)  |
| 1236 | Salbutamol                           | (18559-94-9)   |
| 1237 | Salicylamide                         | (65-45-2)      |
| 1238 | Salmeterol                           | (89365-50-4)   |
| 1239 | Salvinorin A                         | (83729-01-5)   |
| 1240 | Scopolamine                          | (51-34-3)      |
| 1241 | SDB-005                              | (na)           |
| 1242 | SDB-005-5F                           | (na)           |
| 1243 | SDB-006                              | (695213-59-3)  |
| 1244 | SDB-006 N-phenyl                     | (1430634-87-9) |
| 1245 | SDB-006-5F                           | (na)           |
| 1246 | Sebuthylazine                        | (7286-69-3)    |
| 1247 | Secbutabarbital                      | (125-40-6)     |
| 1248 | Secobarbital                         | (76-73-3)      |
| 1249 | Selegiline                           | (14611-51-9)   |
| 1250 | Sertindole                           | (106516-24-9)  |
| 1251 | Sertraline                           | (79617-96-2)   |
| 1252 | Sibutramine                          | (106650-56-0)  |
| 1253 | Sildenafil                           | (139755-83-2)  |
| 1254 | Simvastatin                          | (79902-63-9)   |
| 1255 | Sitagliptin                          | (486460-32-6)  |
| 1256 | Solifenacin                          | (242478-37-1)  |
| 1257 | Sotalol                              | (3930-20-9)    |
| 1258 | Speciociliatine (Mitragyna alkaloid) | (14382-79-7)   |
| 1259 | Speciogynine (Mitragyna alkaloid)    | (4697-67-0)    |

|      |                        |                |
|------|------------------------|----------------|
| 1260 | Spirapril              | (83647-97-6)   |
| 1261 | Stanozolol             | (10418-03-8)   |
| 1262 | Strychnine             | (57-24-9)      |
| 1263 | STS-135                | (1354631-26-7) |
| 1264 | Sufentanil             | (56030-54-7)   |
| 1265 | Sulfabenzamide         | (127-71-9)     |
| 1266 | Sulfaclomide           | (4015-18-3)    |
| 1267 | Sulfadiazine           | (68-35-9)      |
| 1268 | Sulfadoxine            | (2447-57-6)    |
| 1269 | Sulfaethidole          | (94-19-9)      |
| 1270 | Sulfaguanidine         | (57-67-0)      |
| 1271 | Sulfalene              | (152-47-6)     |
| 1272 | Sulfamerazine          | (127-79-7)     |
| 1273 | Sulfamethazine         | (57-68-1)      |
| 1274 | Sulfamethizole         | (144-82-1)     |
| 1275 | Sulfamethoxazole       | (723-46-6)     |
| 1276 | Sulfamethoxypyridazine | (80-35-3)      |
| 1277 | Sulfapyridine          | (144-83-2)     |
| 1278 | Sulfaquinoxaline       | (59-40-5)      |
| 1279 | Sulfasalazine          | (599-79-1)     |
| 1280 | Sulfathiazole          | (72-14-0)      |
| 1281 | Sulfinpyrazone         | (57-96-5)      |
| 1282 | Sulindac               | (38194-50-2)   |
| 1283 | Sulpiride              | (15676-16-1)   |
| 1284 | Sulthiame              | (61-56-3)      |
| 1285 | Sumatriptan            | (103628-46-2)  |
| 1286 | Suxibuzone             | (27470-51-5)   |
| 1287 | Synephrine             | (94-07-5)      |
| 1288 | Tacrine                | (321-64-2)     |
| 1289 | Tadalafil              | (171596-29-5)  |
| 1290 | Talinolol              | (57460-41-0)   |
| 1291 | Tamoxifen              | (10540-29-1)   |
| 1292 | Tapentadol             | (175591-23-8)  |
| 1293 | Telithromycin          | (191114-48-4)  |
| 1294 | Telmisartan            | (144701-48-4)  |
| 1295 | Temazepam              | (846-50-4)     |
| 1296 | Terazosin              | (63590-64-7)   |
| 1297 | Terbinafine            | (91161-71-6)   |
| 1298 | Terbutaline            | (23031-25-6)   |
| 1299 | Terconazole            | (67915-31-5)   |
| 1300 | Terfenadine            | (50679-08-8)   |



|      |                                             |                |
|------|---------------------------------------------|----------------|
| 1301 | Terodiline                                  | (15793-40-5)   |
| 1302 | Tertatolol                                  | (34784-64-0)   |
| 1303 | Testosterone benzoate                       | (2088-71-3)    |
| 1304 | Tetracaine                                  | (94-24-6)      |
| 1305 | Tetracycline                                | (60-54-8)      |
| 1306 | Tetrazepam                                  | (10379-14-3)   |
| 1307 | Tetroxoprim                                 | (53808-87-0)   |
| 1308 | Tetryzoline                                 | (84-22-0)      |
| 1309 | TFMPP                                       | (15532-75-9)   |
| 1310 | THC                                         | (1972-08-3)    |
| 1311 | THC-COOH. 11-COOH-THC. 11-nor-9-Carboxy-THC | (56354-06-4)   |
| 1312 | THC-OH. 11-OH-THC                           | (36557-05-8)   |
| 1313 | Thebacon                                    | (466-90-0)     |
| 1314 | Thebaine                                    | (115-37-7)     |
| 1315 | Theobromine                                 | (83-67-0)      |
| 1316 | Theophylline                                | (58-55-9)      |
| 1317 | Thiethylperazine                            | (1420-55-9)    |
| 1318 | Thiodimethyl Sildenafil                     | (856190-47-1)  |
| 1319 | Thioguanine                                 | (154-42-7)     |
| 1320 | Thiohomo Sildenafil                         | (479073-80-8)  |
| 1321 | Thiopental                                  | (76-75-5)      |
| 1322 | Thiopropazate                               | (84-06-0)      |
| 1323 | Thiopropazine                               | (316-81-4)     |
| 1324 | Thioridazine                                | (50-52-2)      |
| 1325 | Thioridazine-5-sulfoxide                    | (7776-05-8)    |
| 1326 | Thiosildenafil                              | (479073-79-5)  |
| 1327 | Thiothinone. bk-MPA                         | (24065-17-6)   |
| 1328 | Thiothixene                                 | (5591-45-7)    |
| 1329 | THJ                                         | (na)           |
| 1330 | THJ-018                                     | (1364933-55-0) |
| 1331 | THJ-2201                                    | (1801552-01-1) |
| 1332 | THJ-5F                                      | (na)           |
| 1333 | TH-PVP                                      | (na)           |
| 1334 | Thymopentin                                 | (69558-55-0)   |
| 1335 | Tiagabine                                   | (115103-54-3)  |
| 1336 | Tiapride                                    | (51012-32-9)   |
| 1337 | Ticagrelor                                  | (274693-27-5)  |
| 1338 | Ticlopidine                                 | (55142-85-3)   |
| 1339 | Tiemonium                                   | (144-12-7)     |
| 1340 | Tiletamine                                  | (14176-49-9)   |

|      |                            |               |
|------|----------------------------|---------------|
| 1341 | Tilidine                   | (51931-66-9)  |
| 1342 | Timolol                    | (26839-75-8)  |
| 1343 | Tinidazole                 | (19387-91-8)  |
| 1344 | Tiocarlide                 | (910-86-1)    |
| 1345 | Tizanidine                 | (51322-75-9)  |
| 1346 | TMA                        | (1082-23-1)   |
| 1347 | Tolazamide                 | (1156-19-0)   |
| 1348 | Tolazoline                 | (59-98-3)     |
| 1349 | Tolbutamide                | (64-77-7)     |
| 1350 | Toliprolol                 | (2933-94-0)   |
| 1351 | Tolmetin                   | (26171-23-3)  |
| 1352 | Tolnaftate                 | (2398-96-1)   |
| 1353 | Tolpropamine               | (5632-44-0)   |
| 1354 | Tolycaine                  | (3686-58-6)   |
| 1355 | Topiramate                 | (97240-79-4)  |
| 1356 | Topotecan                  | (123948-87-8) |
| 1357 | Torasemide                 | (56211-40-6)  |
| 1358 | Toremifene                 | (89778-26-7)  |
| 1359 | Tramadol                   | (27203-92-5)  |
| 1360 | Trandolapril               | (87679-37-6)  |
| 1361 | Tranexamic acid            | (1197-18-8)   |
| 1362 | Trans-3-methylfentanyl     | (na)          |
| 1363 | Tranlycypromine            | (155-09-9)    |
| 1364 | Trapidil                   | (15421-84-8)  |
| 1365 | Trazodone                  | (19794-93-5)  |
| 1366 | Trenbolone                 | (10161-33-8)  |
| 1367 | Triamcinolone              | (124-94-7)    |
| 1368 | Triamterene                | (396-01-0)    |
| 1369 | Triasulfuron               | (82097-50-5)  |
| 1370 | Triazolam                  | (28911-01-5)  |
| 1371 | Trifluoperazine            | (117-89-5)    |
| 1372 | Trifluoperidol             | (749-13-3)    |
| 1373 | Triflupromazine            | (146-54-3)    |
| 1374 | Trihexyphenidyl. Benzhexol | (144-11-6)    |
| 1375 | Trimethobenzamide          | (138-56-7)    |
| 1376 | Trimethoprim               | (738-70-5)    |
| 1377 | Trimipramine               | (739-71-9)    |
| 1378 | Triperiden                 | (14617-17-5)  |
| 1379 | Triprolidine               | (486-12-4)    |
| 1380 | Tritoqualine               | (14504-73-5)  |
| 1381 | Tromantadine               | (53783-83-8)  |

|      |                                    |                            |
|------|------------------------------------|----------------------------|
| 1382 | Tropatepine                        | (27574-24-9)               |
| 1383 | Tropicamide                        | (1508-75-4)                |
| 1384 | Tropisetron                        | (89565-68-4)               |
| 1385 | Trospium                           | (10405-02-4)               |
| 1386 | Tryptamine                         | (61-54-1)                  |
| 1387 | Tulobuterol                        | (41570-61-0)               |
| 1388 | Tyramine                           | (51-67-2)                  |
| 1389 | U-47700                            | (82657-23-6)               |
| 1390 | Udenafil                           | (268203-93-6)              |
| 1391 | UR-144                             | (1199943-44-6)             |
| 1392 | UR-144 Isomer                      | (na)                       |
| 1393 | UR-144 N-pentanoic acid metabolite | (1451369-33-7)             |
| 1394 | UR-144-N-(4-hydroxypentyl)         | (1537889-04-5)             |
| 1395 | Valacyclovir                       | (124832-26-4)              |
| 1396 | Valdecoxib                         | (181695-72-7)              |
| 1397 | Valsartan                          | (137862-53-4)              |
| 1398 | Vardenafil                         | (224785-90-4)              |
| 1399 | Varenicline                        | (249296-44-4, 375815-87-5) |
| 1400 | Venlafaxine                        | (93413-69-5)               |
| 1401 | Verapamil                          | (52-53-9)                  |
| 1402 | Vigabatrin                         | (60643-86-9)               |
| 1403 | Vildagliptin                       | (274901-16-59)             |
| 1404 | Viloxazine                         | (46817-91-8)               |
| 1405 | Vincamine                          | (1617-90-9)                |
| 1406 | Vortioxetine                       | (508233-74-7)              |
| 1407 | Warfarin                           | (81-81-2)                  |
| 1408 | WIN-55-212-2                       | (131543-22-1)              |
| 1409 | Xanthinol                          | (2530-97-4)                |
| 1410 | Xanthoanthrafil, Benzamidenafil    | (1020251-53-9)             |
| 1411 | Xipamide                           | (14293-44-8)               |
| 1412 | XLR-11                             | (1364933-54-9)             |
| 1413 | XLR-11 Isomer                      | (na)                       |
| 1414 | XLR-12                             | (895155-78-9)              |
| 1415 | Xylometazoline                     | (526-36-3)                 |
| 1416 | Yangonin                           | (500-62-9)                 |
| 1417 | Yohimbine                          | (146-48-5)                 |
| 1418 | Zaleplon                           | (151319-34-5)              |
| 1419 | Ziprasidone                        | (146939-27-7)              |
| 1420 | Zolmitriptan                       | (139264-17-8)              |
| 1421 | Zolpidem                           | (82626-48-0)               |
| 1422 | Zonisamide                         | (68291-97-4)               |

|      |                                      |              |
|------|--------------------------------------|--------------|
| 1423 | Zopiclone                            | (43200-80-2) |
| 1424 | Zotepine                             | (26615-21-4) |
| 1425 | Zuclopenthixol                       | (53772-83-1) |
| 1426 | 1-(2-Methoxyphenyl)piperazine        |              |
| 1427 | 1-(4-methoxyphenyl)piperazine        |              |
| 1428 | 25I-NBF                              |              |
| 1429 | 2-Aminoindane. 2-AI                  |              |
| 1430 | 2C-B-FLY                             |              |
| 1431 | 2C-D                                 |              |
| 1432 | 2-DPMP (desoxypipradrole)            |              |
| 1433 | 2-Fluoroethcathinone. 2-FEC          |              |
| 1434 | 2-fluoromethcathinone                |              |
| 1435 | 2-MEC. 2-Methylethcathinone          |              |
| 1436 | 2-MeO-Diphenidine. Methoxphenidine   |              |
| 1437 | 2-MMC. 2-Methylmethcathinone         |              |
| 1438 | 3,4,5-Trimethoxyamphetamine. TMA     |              |
| 1439 | 3,4-Dimethoxyphenethylamine          |              |
| 1440 | 3,4-Dimethylethcathinone             |              |
| 1441 | 3,4-Methylenedioxy-n-benzylcathinone |              |
| 1442 | 3-4-CTMP                             |              |
| 1443 | 3-Ethylethcathinone                  |              |
| 1444 | 3-Fluorophenmetrazine                |              |
| 1445 | 3-MEC. 3-Methylethcathinone          |              |
| 1446 | 3-MeO-PCP                            |              |
| 1447 | 3-MMC. 3-Methylmethcathinone         |              |
| 1448 | 4-Acetoxy-N-methyl-N-ethyltryptamine |              |
| 1449 | 4-AcO-DMT. Psilacetin                |              |
| 1450 | 4-BMC. Brepheдрone                   |              |
| 1451 | 4-CEC                                |              |
| 1452 | 4-CMC. Clephedrone                   |              |
| 1453 | 4-Cyano CUMYL-BUTINACA               |              |
| 1454 | 4-EMC. 4-Ethylmethcathinone          |              |
| 1455 | 4-Ethylethcathinone                  |              |
| 1456 | 4-Ethylmethcathinone                 |              |
| 1457 | 4-Ethyl-N,N-Dimethylcathinone        |              |
| 1458 | 4F-alpha-PEP. 4F-PV8                 |              |
| 1459 | 4F-alpha-PVP                         |              |
| 1460 | 4-Fluoroethcathinone                 |              |
| 1461 | 4-MeO-PCP                            |              |
| 1462 | 4-MeTMP. 4-Methylmethylphenidate     |              |
| 1463 | 4-MMA (Methylmethamphetamine)        |              |

|      |                                                  |
|------|--------------------------------------------------|
| 1464 | 4-OH MET. Metocin                                |
| 1465 | 5-APDB                                           |
| 1466 | 5-EAPB                                           |
| 1467 | 5F-AMBICA                                        |
| 1468 | 5-Fluoro AKB48 N-(4-hydroxypentyl)<br>metabolite |
| 1469 | 5-Fluoro PB-22 3-carboxyindole metabolite        |
| 1470 | 5-fluoro PY-PICA                                 |
| 1471 | 5F-PB-22. 5-fluoro QUPIC                         |
| 1472 | 5-IT. 5-API                                      |
| 1473 | 5-MAPB                                           |
| 1474 | 5-MeO-MIPT                                       |
| 1475 | 5-MeOPP                                          |
| 1476 | 6-APDB                                           |
| 1477 | 6-EAPB                                           |
| 1478 | AB-FUBINACA metabolite                           |
| 1479 | AB-PINACA metabolite (amide hydrolysis)          |
| 1480 | AB-Pinaca N-(5-OH-PENTYL) metabolite             |
| 1481 | Acetyl-Fentanyl                                  |
| 1482 | Acrylfentanyl                                    |
| 1483 | ADB-Chminaca                                     |
| 1484 | AH-7921                                          |
| 1485 | AKB48 N-(5-hydroxypentyl) metabolite             |
| 1486 | Allylescaline                                    |
| 1487 | ALPHA-PBP. alpha-Pyrrolidinobutiophenone         |
| 1488 | alpha-PEP                                        |
| 1489 | alpha-PHP                                        |
| 1490 | alpha-PMP                                        |
| 1491 | alpha-POP / PV9                                  |
| 1492 | ALPHA-PVP metabolite                             |
| 1493 | alpha-PVT                                        |
| 1494 | alpha-Pyrrolidinobutiophenone                    |
| 1495 | Alprostadile. Prostaglandin E1                   |
| 1496 | AM 1241                                          |
| 1497 | Amitriptylinoxide                                |
| 1498 | Apixaban                                         |
| 1499 | Argatroban                                       |
| 1500 | Bendamustine                                     |
| 1501 | Benodanil                                        |
| 1502 | Benzedrone                                       |
| 1503 | Bitrex (Denatonium)                              |

|      |                             |
|------|-----------------------------|
| 1504 | bk-2C-B                     |
| 1505 | Bromocriptine               |
| 1506 | Butaperazine                |
| 1507 | Butorphanol                 |
| 1508 | Butylscopolamine            |
| 1509 | Butyryl Fentanyl            |
| 1510 | Camfetamine                 |
| 1511 | Candesartan                 |
| 1512 | Carfentanyl                 |
| 1513 | Chloramphenicol             |
| 1514 | Clozapine N-oxide           |
| 1515 | Coumatetralyl               |
| 1516 | D2PM (diphenylprolinol)     |
| 1517 | D3-6-O-Acetylmorphine       |
| 1518 | D3-Atropin                  |
| 1519 | D3-Benzoylecgonine          |
| 1520 | D3-Chlorpromazine           |
| 1521 | D3-Cocaethylene             |
| 1522 | D3-Cocaine                  |
| 1523 | D3-Codeine                  |
| 1524 | D3-Cotinine                 |
| 1525 | D3-Doxepin                  |
| 1526 | D3-Ecgoninemethylester      |
| 1527 | D3-EDDP                     |
| 1528 | D3-Hydromorphone            |
| 1529 | D3-LSD                      |
| 1530 | D3-Morphine                 |
| 1531 | D3-Oxycodone                |
| 1532 | D3-Trimipramine             |
| 1533 | D4-Clonazepam               |
| 1534 | D4-Haloperidol              |
| 1535 | D4-Lorazepam                |
| 1536 | D4-Midazolam                |
| 1537 | D4-N-Desmethylflunitrazepam |
| 1538 | D4-Nicotine                 |
| 1539 | D5-Amphetamine              |
| 1540 | D5-Diazepam                 |
| 1541 | D5-Fentanyl                 |
| 1542 | D5-MBDB                     |
| 1543 | D5-MDA                      |
| 1544 | D5-MDEA                     |

|      |                                                |
|------|------------------------------------------------|
| 1545 | D5-MDMA                                        |
| 1546 | D5-Nordiazepam                                 |
| 1547 | D5-Oxazepam                                    |
| 1548 | D5-Temazepam                                   |
| 1549 | D6-Dihydrocodeine                              |
| 1550 | D6-Fluoxetine                                  |
| 1551 | D6-Zolpidem                                    |
| 1552 | D7-7-Aminoflunitrazepam                        |
| 1553 | D7-Flunitrazepam                               |
| 1554 | D9-Heroin                                      |
| 1555 | D9-Methadone                                   |
| 1556 | DALT                                           |
| 1557 | Deschloroketamine                              |
| 1558 | Desmethoxyyangonin                             |
| 1559 | Desmethyl carbodenafil                         |
| 1560 | Desmethyldiazepam                              |
| 1561 | Desmethylnortriptyline                         |
| 1562 | Desmethylpromazine                             |
| 1563 | Dexmedetomidine                                |
| 1564 | Dextrorphan. O-Desmethyldextromethorphan       |
| 1565 | Digoxin                                        |
| 1566 | Dihydrokavain                                  |
| 1567 | Dihydromethysticin                             |
| 1568 | Diphenidine                                    |
| 1569 | DL-4-methylamphetamine                         |
| 1570 | Domperidone                                    |
| 1571 | E-10-Hydroxyamitriptyline                      |
| 1572 | Edoxaban                                       |
| 1573 | Emepronium                                     |
| 1574 | Etaqualone                                     |
| 1575 | Etilefrine                                     |
| 1576 | Euthylone. bk-EBDB                             |
| 1577 | Fenoterol                                      |
| 1578 | Fluoro methyl phenidate                        |
| 1579 | Frovatriptan                                   |
| 1580 | Furanyl fentanyl                               |
| 1581 | Guanethidine                                   |
| 1582 | HDMP-28. Methyl naphthidate                    |
| 1583 | Homofenazine                                   |
| 1584 | Hydroxybupropion (as (RS,RS)-cyclic Hemiketal) |

|      |                                          |
|------|------------------------------------------|
| 1585 | Ibogaine                                 |
| 1586 | Isopropylphenidate                       |
| 1587 | JWH-019-(5-hydroxyindol) metabolite      |
| 1588 | JWH-073-N-(3-hydroxybutyl) metabolite-D5 |
| 1589 | JWH-081-N-(5-hydroxypentyl) metabolite   |
| 1590 | JWH-210-N-(4-hydroxypentyl) metabolite   |
| 1591 | JWH-250-N-(4-hydroxypentyl) metabolite   |
| 1592 | JWH-398-N-(5-hydroxypentyl) metabolite   |
| 1593 | Leflunomide                              |
| 1594 | Levamisole                               |
| 1595 | Lofexidine                               |
| 1596 | Loperamide                               |
| 1597 | Losartan Carboxylic Acid (EXP-3174)      |
| 1598 | Loxapine                                 |
| 1599 | Lurasidone                               |
| 1600 | MAM2201 N-pentanoic acid metabolite      |
| 1601 | MDPHP                                    |
| 1602 | Mebroqualone                             |
| 1603 | Meftetramine                             |
| 1604 | Metamfepramone                           |
| 1605 | Methoxetamine. MXE                       |
| 1606 | Methoxypiperamide                        |
| 1607 | Methysticin                              |
| 1608 | Mexedrone                                |
| 1609 | Mitragynine                              |
| 1610 | MPHP                                     |
| 1611 | MPPP (3-desmethylprodine)                |
| 1612 | MT-45                                    |
| 1613 | N-(3-Methylbenzyl)piperazine             |
| 1614 | N,N-Diisobutyltryptamine                 |
| 1615 | Nalmefene                                |
| 1616 | N-Desmethyllanzapine                     |
| 1617 | Neostigmine                              |
| 1618 | N-Ethylbuphedrone                        |
| 1619 | Nimetazepam                              |
| 1620 | NM-2-AI                                  |
| 1621 | N-Methyl Pregabalin                      |
| 1622 | NMT                                      |
| 1623 | Norchlorprothixene                       |
| 1624 | Norcocaine                               |
| 1625 | Norfluoxetine                            |



|      |                                         |
|------|-----------------------------------------|
| 1626 | Norketamine                             |
| 1627 | Normephedrone                           |
| 1628 | Norneosildenafil                        |
| 1629 | Ocfentanil                              |
| 1630 | oCpp (1-2 chloropiperazine)             |
| 1631 | PB-22 3-carboxyindole metabolite        |
| 1632 | PB-22 N-(5-hydroxypentyl) metabolite    |
| 1633 | p-FBF                                   |
| 1634 | Phenylpiracetam                         |
| 1635 | Piracetam                               |
| 1636 | Pravadoline                             |
| 1637 | Propoxyphenyl sildenafil                |
| 1638 | Propoxyphenyl-Thiohydroxyhomosildenafil |
| 1639 | PV8. alpha-PHPP                         |
| 1640 | Rasagiline                              |
| 1641 | RH-34                                   |
| 1642 | Salvinorin A                            |
| 1643 | Stanozolol                              |
| 1644 | Sulfamethazine                          |
| 1645 | Tetracycline                            |
| 1646 | Thebaine                                |
| 1647 | Thiothinone. bk-MPA                     |
| 1648 | TH-PVP                                  |
| 1649 | Tiletamine                              |
| 1650 | Topiramate                              |
| 1651 | Tropatepine                             |
| 1652 | Tryptamine                              |
| 1653 | U-47700                                 |
| 1654 | UR-144 N-pentanoic acid metabolite      |
| 1655 | UR-144-N-(4-hydroxypentyl)              |
| 1656 | Viloxazine                              |
| 1657 | Vortioxetine                            |
| 1658 | Xanthoanthrafil. Benzamidenafil         |
| 1659 | Yangonin                                |

---
