# Supplementary material for: Assessment of Xenoestrogens in Jordanian Water System: Activity and Identification
Source: MDPI journal article supplement (doi:10.3390/toxics11010063), 2023-01-09
Supplement: s1 [file s1]

# Compound Spectrum List Report

Analysis Info 24\_August\_2021\_Dr\_Yazan alakam\_2

Acquisition Date 24/08/2021

Method Kailani\_MS/MS

Operator Demo User  
Instrument impact II 1825265.10265

## Acquisition Parameter

|             |          |                      |          |                |           |
|-------------|----------|----------------------|----------|----------------|-----------|
| Source Type | ESI      | Ion Polarity         | Positive | Set Nebulizer  | 2.0 Bar   |
| Focus       | Active   | Set Capillary        | 2500 V   | Set Dry Heater | 200 °C    |
| Scan Begin  | 30 m/z   | Set End Plate Offset | -500 V   | Set Dry Gas    | 8.0 l/min |
| Scan End    | 1000 m/z | Set Charging Voltage | 2000 V   |                |           |

## Cmpd 1, Dissect, 1.3 min

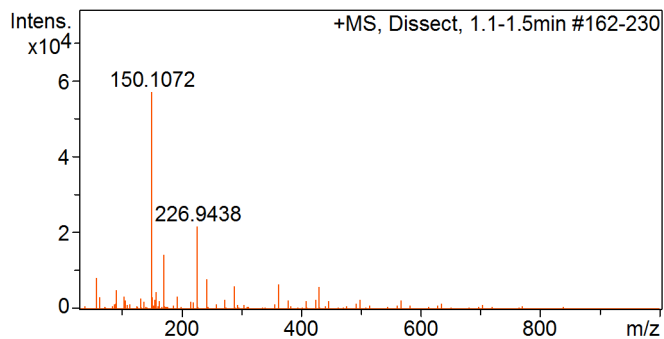

| #  | m/z      | Res.  | S/N   | I     | I %   | FWHM   |
|----|----------|-------|-------|-------|-------|--------|
| 1  | 58.0629  | 17235 | 144.7 | 8273  | 14.5  | 0.0034 |
| 2  | 90.9736  | 19427 | 91.1  | 5208  | 9.1   | 0.0047 |
| 3  | 150.1072 | 27037 | 998.4 | 57065 | 100.0 | 0.0056 |
| 4  | 158.9586 | 26619 | 80.7  | 4612  | 8.1   | 0.0060 |
| 5  | 172.0886 | 27547 | 250.6 | 14326 | 25.1  | 0.0062 |
| 6  | 226.9438 | 31578 | 382.1 | 21842 | 38.3  | 0.0072 |
| 7  | 242.9173 | 30799 | 140.8 | 8045  | 14.1  | 0.0079 |
| 8  | 288.9120 | 29233 | 107.0 | 6115  | 10.7  | 0.0099 |
| 9  | 362.9142 | 33919 | 115.2 | 6582  | 11.5  | 0.0107 |
| 10 | 430.8992 | 31478 | 103.4 | 5909  | 10.4  | 0.0137 |

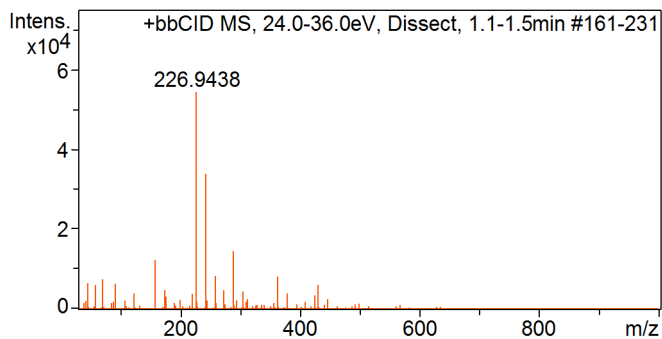

| #  | m/z      | Res.  | S/N   | I     | I %   | FWHM   |
|----|----------|-------|-------|-------|-------|--------|
| 1  | 45.0315  | 15747 | 123.2 | 6708  | 12.3  | 0.0029 |
| 2  | 70.0626  | 18185 | 139.6 | 7605  | 14.0  | 0.0039 |
| 3  | 90.9737  | 19692 | 119.2 | 6490  | 11.9  | 0.0046 |
| 4  | 158.9585 | 27342 | 228.0 | 12416 | 22.8  | 0.0058 |
| 5  | 226.9438 | 31428 | 998.6 | 54390 | 100.0 | 0.0072 |
| 6  | 242.9172 | 32344 | 623.2 | 33945 | 62.4  | 0.0075 |
| 7  | 258.8906 | 28962 | 155.0 | 8442  | 15.5  | 0.0089 |
| 8  | 288.9119 | 30619 | 270.6 | 14737 | 27.1  | 0.0094 |
| 9  | 362.9141 | 31292 | 152.0 | 8278  | 15.2  | 0.0116 |
| 10 | 430.8988 | 31197 | 114.1 | 6215  | 11.4  | 0.0138 |

# Compound Spectrum List Report

## Cmpd 2, Dissect, 1.4 min

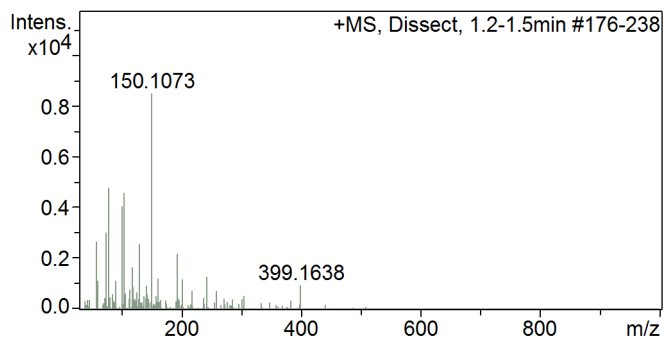

| #  | m/z      | Res.  | S/N   | I    | I %   | FWHM   |
|----|----------|-------|-------|------|-------|--------|
| 1  | 58.0629  | 17045 | 312.5 | 2664 | 31.3  | 0.0034 |
| 2  | 74.0937  | 18279 | 355.0 | 3026 | 35.6  | 0.0041 |
| 3  | 79.0184  | 18790 | 560.5 | 4778 | 56.2  | 0.0042 |
| 4  | 101.0564 | 20167 | 476.3 | 4060 | 47.7  | 0.0050 |
| 5  | 104.1037 | 21049 | 537.2 | 4579 | 53.8  | 0.0049 |
| 6  | 118.0823 | 23275 | 195.0 | 1662 | 19.5  | 0.0051 |
| 7  | 130.1044 | 23115 | 301.7 | 2571 | 30.2  | 0.0056 |
| 8  | 150.1073 | 26676 | 998.0 | 8507 | 100.0 | 0.0056 |
| 9  | 194.1319 | 27084 | 257.4 | 2194 | 25.8  | 0.0072 |
| 10 | 242.9173 | 29638 | 151.6 | 1292 | 15.2  | 0.0082 |

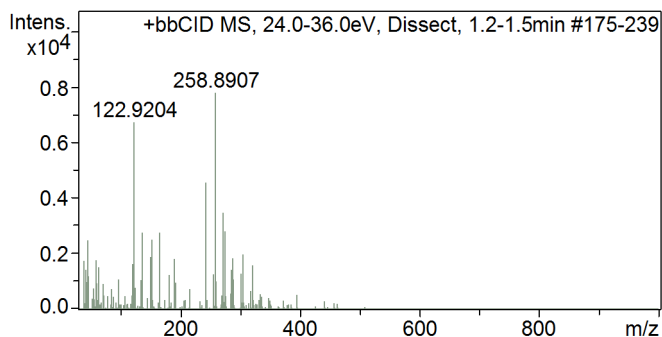

| #  | m/z      | Res.  | S/N   | I    | I %   | FWHM   |
|----|----------|-------|-------|------|-------|--------|
| 1  | 45.0316  | 15821 | 320.4 | 2495 | 32.0  | 0.0028 |
| 2  | 122.9204 | 23864 | 862.8 | 6721 | 86.3  | 0.0052 |
| 3  | 135.9723 | 25622 | 353.8 | 2756 | 35.4  | 0.0053 |
| 4  | 151.9458 | 27061 | 321.4 | 2503 | 32.1  | 0.0056 |
| 5  | 165.9820 | 27781 | 354.4 | 2761 | 35.4  | 0.0060 |
| 6  | 242.9173 | 31877 | 585.4 | 4560 | 58.5  | 0.0076 |
| 7  | 258.8907 | 29635 | 999.8 | 7788 | 100.0 | 0.0087 |
| 8  | 271.9431 | 32400 | 445.6 | 3471 | 44.6  | 0.0084 |
| 9  | 274.8642 | 30420 | 359.7 | 2802 | 36.0  | 0.0090 |
| 10 | 304.8850 | 29689 | 255.6 | 1991 | 25.6  | 0.0103 |

## Cmpd 3, Dissect, 1.5 min

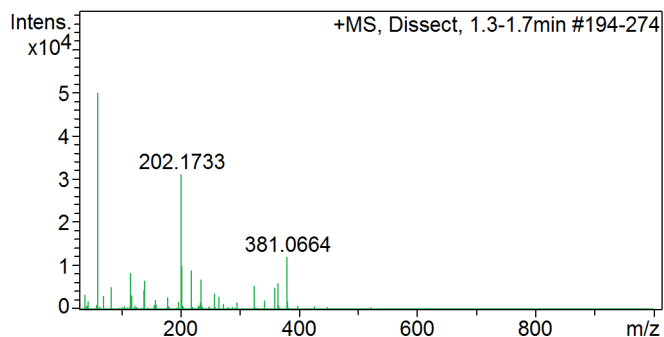

| #  | m/z      | Res.  | S/N   | I     | I %   | FWHM   |
|----|----------|-------|-------|-------|-------|--------|
| 1  | 61.0373  | 17231 | 999.1 | 49959 | 100.0 | 0.0035 |
| 2  | 116.0668 | 22358 | 169.1 | 8455  | 16.9  | 0.0052 |
| 3  | 139.0455 | 25474 | 133.1 | 6657  | 13.3  | 0.0055 |
| 4  | 202.1733 | 29776 | 622.7 | 31135 | 62.3  | 0.0068 |
| 5  | 203.0457 | 29480 | 201.1 | 10055 | 20.1  | 0.0069 |
| 6  | 219.0191 | 29801 | 180.8 | 9039  | 18.1  | 0.0073 |
| 7  | 236.1415 | 31336 | 140.4 | 7019  | 14.1  | 0.0075 |
| 8  | 325.1018 | 31714 | 109.1 | 5455  | 10.9  | 0.0103 |
| 9  | 365.0932 | 32328 | 122.7 | 6133  | 12.3  | 0.0113 |
| 10 | 381.0664 | 32204 | 242.3 | 12115 | 24.2  | 0.0118 |

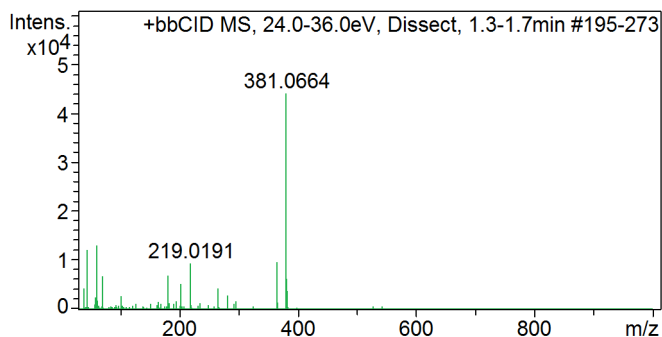

| #  | m/z      | Res.  | S/N   | I     | I %   | FWHM   |
|----|----------|-------|-------|-------|-------|--------|
| 1  | 38.9615  | 14619 | 99.3  | 4385  | 9.9   | 0.0027 |
| 2  | 44.0112  | 15457 | 276.0 | 12195 | 27.6  | 0.0028 |
| 3  | 61.0374  | 16750 | 295.4 | 13053 | 29.6  | 0.0036 |
| 4  | 70.0625  | 18046 | 154.6 | 6830  | 15.5  | 0.0039 |
| 5  | 181.9555 | 27314 | 158.5 | 7001  | 15.9  | 0.0067 |
| 6  | 203.0457 | 29124 | 119.5 | 5278  | 12.0  | 0.0070 |
| 7  | 219.0191 | 30062 | 215.0 | 9500  | 21.5  | 0.0073 |
| 8  | 365.0927 | 31899 | 219.5 | 9697  | 22.0  | 0.0114 |
| 9  | 381.0664 | 31927 | 999.3 | 44151 | 100.0 | 0.0119 |
| 10 | 382.0697 | 30244 | 144.0 | 6362  | 14.4  | 0.0126 |

# Compound Spectrum List Report

## Cmpd 4, Dissect, 1.6 min

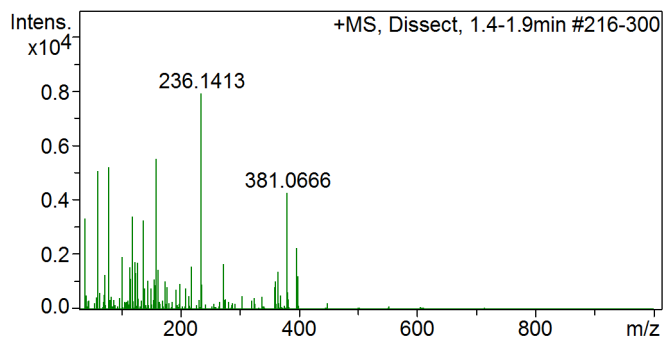

| #  | m/z      | Res.  | S/N   | I    | I %   | FWHM   |
|----|----------|-------|-------|------|-------|--------|
| 1  | 38.9614  | 14569 | 421.6 | 3341 | 42.2  | 0.0027 |
| 2  | 61.0373  | 16972 | 639.1 | 5065 | 63.9  | 0.0036 |
| 3  | 79.0184  | 18648 | 657.5 | 5210 | 65.8  | 0.0042 |
| 4  | 102.1244 | 20303 | 244.4 | 1937 | 24.5  | 0.0050 |
| 5  | 119.0563 | 23274 | 430.5 | 3411 | 43.1  | 0.0051 |
| 6  | 137.0762 | 25336 | 412.2 | 3267 | 41.2  | 0.0054 |
| 7  | 159.0574 | 26246 | 694.9 | 5507 | 69.5  | 0.0061 |
| 8  | 236.1413 | 31109 | 999.7 | 7922 | 100.0 | 0.0076 |
| 9  | 381.0666 | 32086 | 539.4 | 4275 | 54.0  | 0.0119 |
| 10 | 397.2578 | 32707 | 285.9 | 2266 | 28.6  | 0.0121 |

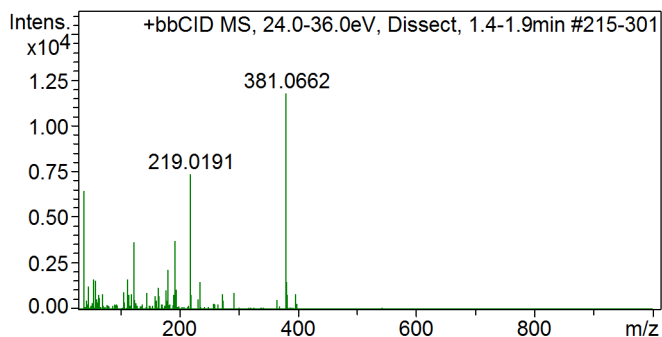

| #  | m/z      | Res.  | S/N   | I     | I %   | FWHM   |
|----|----------|-------|-------|-------|-------|--------|
| 1  | 38.9614  | 14659 | 549.6 | 6462  | 55.0  | 0.0027 |
| 2  | 55.0520  | 17017 | 141.2 | 1660  | 14.1  | 0.0032 |
| 3  | 58.0629  | 17261 | 135.4 | 1591  | 13.5  | 0.0034 |
| 4  | 112.8917 | 23355 | 139.4 | 1639  | 13.9  | 0.0048 |
| 5  | 122.9203 | 24191 | 313.2 | 3682  | 31.3  | 0.0051 |
| 6  | 181.9553 | 28314 | 183.6 | 2158  | 18.4  | 0.0064 |
| 7  | 193.9913 | 29632 | 319.3 | 3754  | 31.9  | 0.0065 |
| 8  | 219.0191 | 29662 | 625.4 | 7353  | 62.5  | 0.0074 |
| 9  | 381.0662 | 31938 | 999.8 | 11755 | 100.0 | 0.0119 |
| 10 | 382.0699 | 30552 | 129.0 | 1516  | 12.9  | 0.0125 |

## Cmpd 5, Dissect, 1.7 min

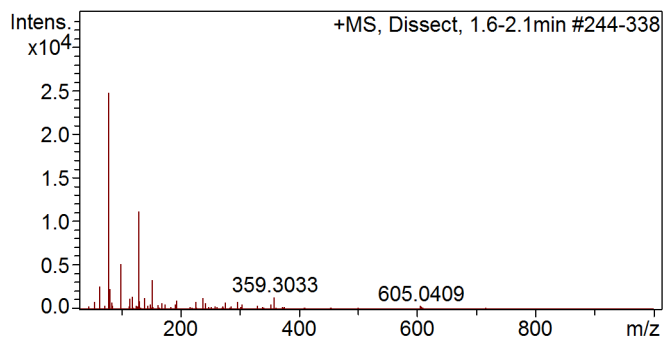

| #  | m/z      | Res.  | S/N   | I     | I %   | FWHM   |
|----|----------|-------|-------|-------|-------|--------|
| 1  | 63.9955  | 17360 | 107.3 | 2660  | 10.7  | 0.0037 |
| 2  | 79.0184  | 18763 | 998.5 | 24753 | 100.0 | 0.0042 |
| 3  | 81.0141  | 19754 | 95.0  | 2356  | 9.5   | 0.0041 |
| 4  | 100.1089 | 20782 | 209.6 | 5195  | 21.0  | 0.0048 |
| 5  | 119.0564 | 23301 | 59.2  | 1467  | 5.9   | 0.0051 |
| 6  | 130.0455 | 25188 | 451.1 | 11182 | 45.2  | 0.0052 |
| 7  | 140.0882 | 25225 | 54.9  | 1361  | 5.5   | 0.0056 |
| 8  | 152.0266 | 27348 | 135.6 | 3361  | 13.6  | 0.0056 |
| 9  | 239.1413 | 29723 | 54.0  | 1338  | 5.4   | 0.0080 |
| 10 | 359.3033 | 31514 | 57.6  | 1427  | 5.8   | 0.0114 |

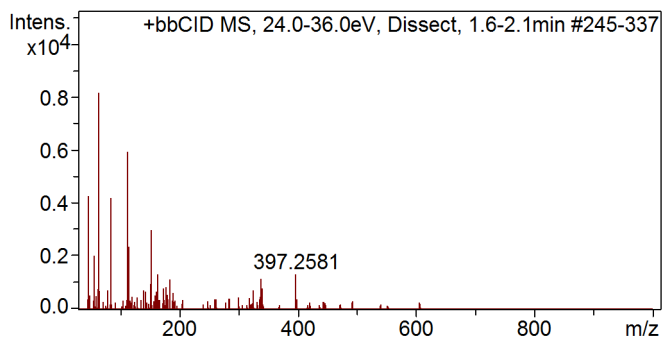

| #  | m/z      | Res.  | S/N   | I    | I %   | FWHM   |
|----|----------|-------|-------|------|-------|--------|
| 1  | 46.9930  | 15903 | 522.7 | 4263 | 52.3  | 0.0030 |
| 2  | 56.0472  | 16719 | 248.1 | 2024 | 24.8  | 0.0034 |
| 3  | 63.9955  | 16934 | 999.8 | 8154 | 100.0 | 0.0038 |
| 4  | 84.0415  | 19297 | 514.9 | 4199 | 51.5  | 0.0044 |
| 5  | 84.0778  | 20179 | 196.3 | 1601 | 19.6  | 0.0042 |
| 6  | 112.8917 | 23116 | 727.5 | 5933 | 72.8  | 0.0049 |
| 7  | 114.8892 | 22666 | 289.8 | 2363 | 29.0  | 0.0051 |
| 8  | 152.0266 | 26635 | 367.1 | 2994 | 36.7  | 0.0057 |
| 9  | 164.9149 | 28177 | 164.7 | 1344 | 16.5  | 0.0059 |
| 10 | 397.2581 | 31570 | 163.9 | 1336 | 16.4  | 0.0126 |

# Compound Spectrum List Report

## Cmpd 6, Dissect, 1.8 min

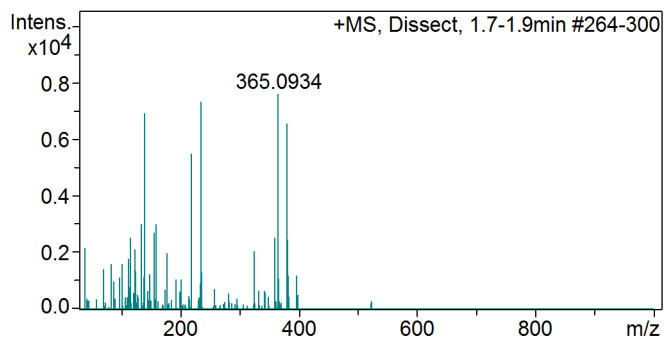

| #  | m/z      | Res.  | S/N   | I    | I %   | FWHM   |
|----|----------|-------|-------|------|-------|--------|
| 1  | 116.0666 | 23560 | 334.7 | 2546 | 33.5  | 0.0049 |
| 2  | 134.0403 | 24964 | 395.9 | 3012 | 39.7  | 0.0054 |
| 3  | 139.0455 | 25749 | 907.2 | 6902 | 90.9  | 0.0054 |
| 4  | 156.0217 | 26404 | 337.3 | 2566 | 33.8  | 0.0059 |
| 5  | 156.1329 | 27787 | 357.0 | 2716 | 35.8  | 0.0056 |
| 6  | 159.0573 | 26939 | 394.4 | 3000 | 39.5  | 0.0059 |
| 7  | 219.0194 | 30375 | 721.6 | 5489 | 72.3  | 0.0072 |
| 8  | 236.1414 | 30766 | 963.4 | 7329 | 96.5  | 0.0077 |
| 9  | 365.0934 | 34236 | 998.3 | 7594 | 100.0 | 0.0107 |
| 10 | 381.0663 | 33740 | 859.5 | 6539 | 86.1  | 0.0113 |

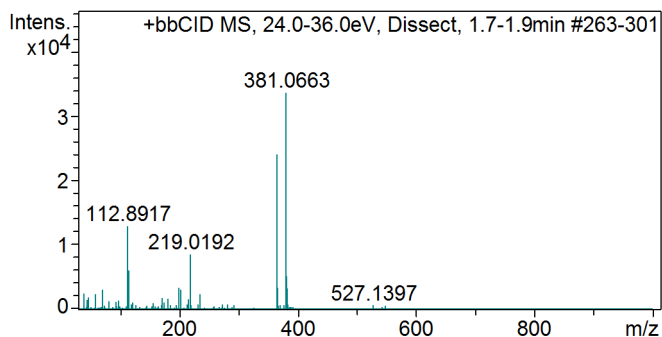

| #  | m/z      | Res.  | S/N   | I     | I %   | FWHM   |
|----|----------|-------|-------|-------|-------|--------|
| 1  | 112.8917 | 23098 | 384.6 | 12969 | 38.5  | 0.0049 |
| 2  | 114.8892 | 22748 | 182.1 | 6141  | 18.3  | 0.0051 |
| 3  | 199.9838 | 28810 | 100.7 | 3396  | 10.1  | 0.0069 |
| 4  | 203.0458 | 29283 | 94.1  | 3172  | 9.4   | 0.0069 |
| 5  | 219.0192 | 30333 | 253.2 | 8537  | 25.4  | 0.0072 |
| 6  | 365.0928 | 32826 | 713.3 | 24050 | 71.5  | 0.0111 |
| 7  | 366.0966 | 30812 | 100.2 | 3378  | 10.0  | 0.0119 |
| 8  | 381.0663 | 31480 | 997.9 | 33648 | 100.0 | 0.0121 |
| 9  | 382.0695 | 30679 | 155.7 | 5248  | 15.6  | 0.0125 |
| 10 | 383.0665 | 28707 | 98.3  | 3315  | 9.9   | 0.0133 |

## Cmpd 7, Dissect, 1.9 min

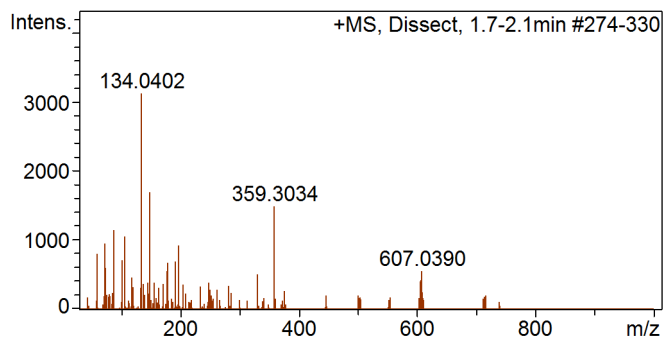

| #  | m/z      | Res.  | S/N   | I    | I %   | FWHM   |
|----|----------|-------|-------|------|-------|--------|
| 1  | 60.0422  | 16421 | 259.5 | 811  | 26.0  | 0.0037 |
| 2  | 72.0782  | 17983 | 305.1 | 954  | 30.5  | 0.0040 |
| 3  | 88.0363  | 19115 | 368.5 | 1152 | 36.9  | 0.0046 |
| 4  | 102.0513 | 21714 | 228.4 | 714  | 22.8  | 0.0047 |
| 5  | 106.0462 | 21825 | 336.9 | 1054 | 33.7  | 0.0049 |
| 6  | 134.0402 | 24253 | 999.8 | 3126 | 100.0 | 0.0055 |
| 7  | 148.0555 | 26234 | 542.4 | 1696 | 54.3  | 0.0056 |
| 8  | 193.0640 | 27836 | 221.8 | 694  | 22.2  | 0.0069 |
| 9  | 198.0906 | 28143 | 296.9 | 928  | 29.7  | 0.0070 |
| 10 | 359.3034 | 31374 | 477.1 | 1492 | 47.7  | 0.0115 |

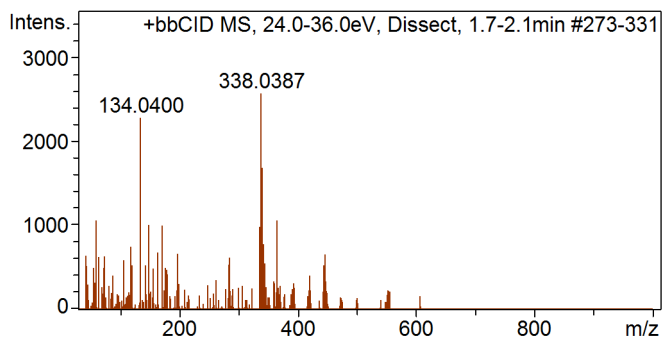

| #  | m/z      | Res.  | S/N   | I    | I %   | FWHM   |
|----|----------|-------|-------|------|-------|--------|
| 1  | 60.0421  | 16856 | 412.5 | 1062 | 41.3  | 0.0036 |
| 2  | 118.0824 | 24778 | 289.5 | 745  | 29.0  | 0.0048 |
| 3  | 134.0400 | 25504 | 884.3 | 2277 | 88.5  | 0.0053 |
| 4  | 148.0553 | 25258 | 390.2 | 1005 | 39.1  | 0.0059 |
| 5  | 171.9947 | 30255 | 386.8 | 996  | 38.7  | 0.0057 |
| 6  | 336.0415 | 31092 | 381.2 | 982  | 38.2  | 0.0108 |
| 7  | 338.0387 | 34198 | 999.1 | 2573 | 100.0 | 0.0099 |
| 8  | 340.0362 | 30150 | 653.7 | 1683 | 65.4  | 0.0113 |
| 9  | 342.9939 | 31402 | 303.7 | 782  | 30.4  | 0.0109 |
| 10 | 365.0931 | 33664 | 412.3 | 1062 | 41.3  | 0.0108 |

# Compound Spectrum List Report

## Cmpd 8, Dissect, 2.0 min

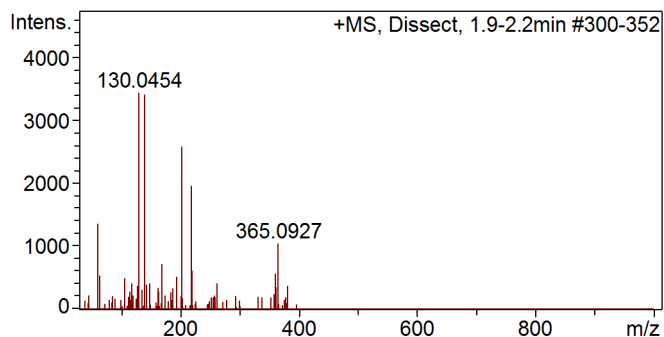

| #  | m/z      | Res.  | S/N   | I    | I %   | FWHM   |
|----|----------|-------|-------|------|-------|--------|
| 1  | 61.0085  | 17509 | 173.8 | 598  | 17.4  | 0.0035 |
| 2  | 61.0374  | 16954 | 396.4 | 1365 | 39.7  | 0.0036 |
| 3  | 130.0454 | 25049 | 997.6 | 3435 | 100.0 | 0.0052 |
| 4  | 139.0455 | 26040 | 988.9 | 3405 | 99.1  | 0.0053 |
| 5  | 170.0366 | 27712 | 210.6 | 725  | 21.1  | 0.0061 |
| 6  | 203.0459 | 28689 | 748.1 | 2576 | 75.0  | 0.0071 |
| 7  | 219.0191 | 28936 | 570.7 | 1965 | 57.2  | 0.0076 |
| 8  | 221.1095 | 30033 | 180.7 | 622  | 18.1  | 0.0074 |
| 9  | 361.2099 | 32986 | 167.2 | 576  | 16.8  | 0.0110 |
| 10 | 365.0927 | 32114 | 304.7 | 1049 | 30.5  | 0.0114 |

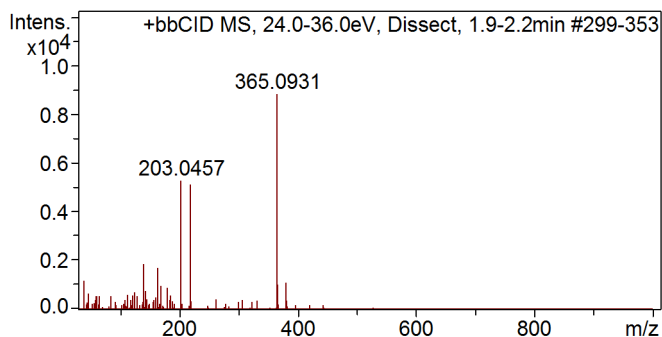

| #  | m/z      | Res.  | S/N   | I    | I %   | FWHM   |
|----|----------|-------|-------|------|-------|--------|
| 1  | 38.9615  | 14616 | 134.6 | 1190 | 13.5  | 0.0027 |
| 2  | 139.0452 | 26133 | 178.8 | 1580 | 17.9  | 0.0053 |
| 3  | 139.9099 | 26370 | 212.8 | 1881 | 21.3  | 0.0053 |
| 4  | 164.9149 | 27192 | 193.3 | 1708 | 19.4  | 0.0061 |
| 5  | 170.0365 | 27156 | 109.9 | 971  | 11.0  | 0.0063 |
| 6  | 203.0457 | 28441 | 597.5 | 5280 | 59.8  | 0.0071 |
| 7  | 219.0191 | 29753 | 580.0 | 5126 | 58.1  | 0.0074 |
| 8  | 365.0931 | 33780 | 998.4 | 8824 | 100.0 | 0.0108 |
| 9  | 366.0964 | 32682 | 117.5 | 1038 | 11.8  | 0.0112 |
| 10 | 381.0662 | 30201 | 125.7 | 1111 | 12.6  | 0.0126 |

## Cmpd 9, Dissect, 2.0 min

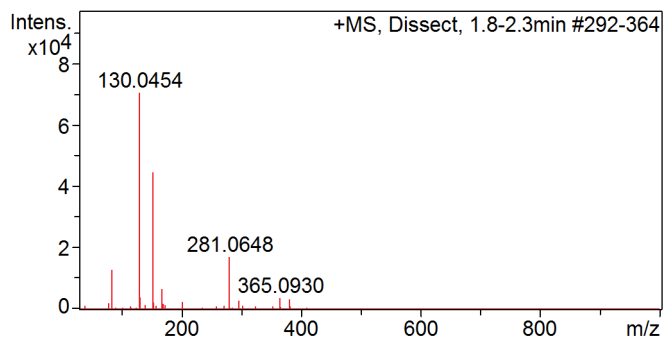

| #  | m/z      | Res.  | S/N   | I     | I %   | FWHM   |
|----|----------|-------|-------|-------|-------|--------|
| 1  | 84.0416  | 19264 | 182.8 | 12905 | 18.3  | 0.0044 |
| 2  | 130.0454 | 25170 | 997.7 | 70440 | 100.0 | 0.0052 |
| 3  | 131.0489 | 23752 | 56.4  | 3983  | 5.7   | 0.0055 |
| 4  | 152.0265 | 27242 | 631.5 | 44587 | 63.3  | 0.0056 |
| 5  | 167.9999 | 27207 | 96.0  | 6779  | 9.6   | 0.0062 |
| 6  | 203.0456 | 28849 | 32.9  | 2322  | 3.3   | 0.0070 |
| 7  | 281.0648 | 32025 | 243.9 | 17224 | 24.5  | 0.0088 |
| 8  | 297.0378 | 29818 | 40.2  | 2836  | 4.0   | 0.0100 |
| 9  | 365.0930 | 31653 | 53.1  | 3746  | 5.3   | 0.0115 |
| 10 | 381.2842 | 30603 | 47.3  | 3338  | 4.7   | 0.0125 |

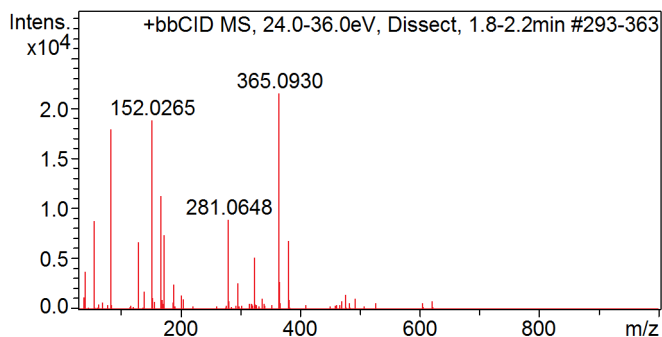

| #  | m/z      | Res.  | S/N   | I     | I %   | FWHM   |
|----|----------|-------|-------|-------|-------|--------|
| 1  | 56.0471  | 17094 | 407.9 | 8780  | 40.8  | 0.0033 |
| 2  | 84.0415  | 19526 | 830.7 | 17880 | 83.1  | 0.0043 |
| 3  | 130.0455 | 24550 | 312.8 | 6732  | 31.3  | 0.0053 |
| 4  | 152.0265 | 26686 | 870.7 | 18742 | 87.1  | 0.0057 |
| 5  | 168.0000 | 27627 | 522.9 | 11256 | 52.3  | 0.0061 |
| 6  | 174.0077 | 27660 | 342.7 | 7377  | 34.3  | 0.0063 |
| 7  | 281.0648 | 31556 | 414.7 | 8926  | 41.5  | 0.0089 |
| 8  | 325.0277 | 32970 | 241.5 | 5198  | 24.2  | 0.0099 |
| 9  | 365.0930 | 33203 | 999.6 | 21516 | 100.0 | 0.0110 |
| 10 | 381.0664 | 30450 | 318.4 | 6854  | 31.9  | 0.0125 |

# Compound Spectrum List Report

## Cmpd 10, Dissect, 2.2 min

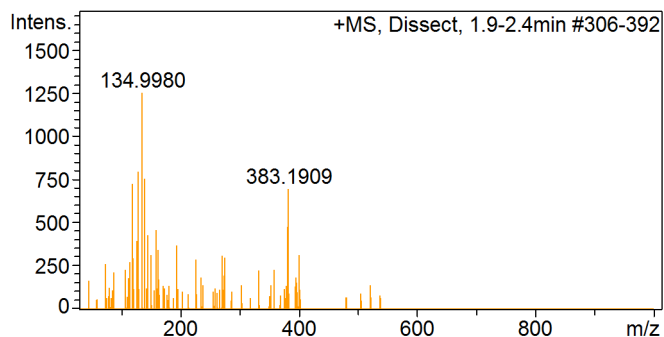

| #  | m/z      | Res.  | S/N   | I    | I %   | FWHM   |
|----|----------|-------|-------|------|-------|--------|
| 1  | 119.0563 | 23697 | 577.7 | 726  | 57.9  | 0.0050 |
| 2  | 127.0701 | 23595 | 316.7 | 398  | 31.8  | 0.0054 |
| 3  | 129.0479 | 25037 | 632.0 | 794  | 63.4  | 0.0052 |
| 4  | 134.9980 | 25850 | 997.3 | 1253 | 100.0 | 0.0052 |
| 5  | 140.0883 | 26127 | 599.6 | 753  | 60.1  | 0.0054 |
| 6  | 145.0597 | 25990 | 342.0 | 430  | 34.3  | 0.0056 |
| 7  | 159.0573 | 26041 | 364.7 | 458  | 36.6  | 0.0061 |
| 8  | 195.1161 | 29175 | 296.1 | 372  | 29.7  | 0.0067 |
| 9  | 381.2840 | 32586 | 379.1 | 476  | 38.0  | 0.0117 |
| 10 | 383.1909 | 29982 | 554.1 | 696  | 55.6  | 0.0128 |

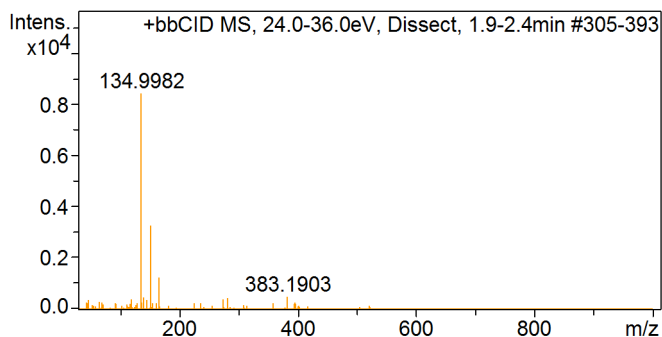

| #  | m/z      | Res.  | S/N   | I    | I %   | FWHM   |
|----|----------|-------|-------|------|-------|--------|
| 1  | 46.9931  | 15996 | 46.0  | 389  | 4.6   | 0.0029 |
| 2  | 119.0563 | 23606 | 49.5  | 418  | 5.0   | 0.0050 |
| 3  | 134.9982 | 25743 | 998.4 | 8433 | 100.0 | 0.0052 |
| 4  | 139.9099 | 25472 | 58.7  | 496  | 5.9   | 0.0055 |
| 5  | 150.9715 | 26869 | 386.1 | 3261 | 38.7  | 0.0056 |
| 6  | 166.9450 | 26877 | 148.3 | 1253 | 14.9  | 0.0062 |
| 7  | 274.9556 | 35781 | 50.1  | 423  | 5.0   | 0.0077 |
| 8  | 275.0426 | 37247 | 43.1  | 364  | 4.3   | 0.0074 |
| 9  | 282.0393 | 30587 | 53.1  | 448  | 5.3   | 0.0092 |
| 10 | 383.1903 | 33726 | 61.6  | 520  | 6.2   | 0.0114 |

## Cmpd 11, Dissect, 2.3 min

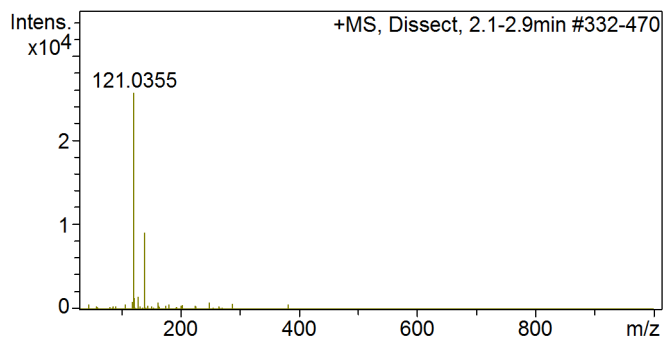

| #  | m/z      | Res.  | S/N   | I     | I %   | FWHM   |
|----|----------|-------|-------|-------|-------|--------|
| 1  | 107.0669 | 21791 | 22.9  | 590   | 2.3   | 0.0049 |
| 2  | 119.0563 | 23663 | 32.3  | 831   | 3.2   | 0.0050 |
| 3  | 121.0355 | 24177 | 995.5 | 25630 | 100.0 | 0.0050 |
| 4  | 122.0386 | 22954 | 55.0  | 1415  | 5.5   | 0.0053 |
| 5  | 129.0480 | 24201 | 61.6  | 1585  | 6.2   | 0.0053 |
| 6  | 139.0454 | 25659 | 352.1 | 9066  | 35.4  | 0.0054 |
| 7  | 163.1174 | 26862 | 29.6  | 763   | 3.0   | 0.0061 |
| 8  | 182.0751 | 27621 | 22.3  | 575   | 2.2   | 0.0066 |
| 9  | 250.0713 | 29823 | 29.7  | 764   | 3.0   | 0.0084 |
| 10 | 288.9124 | 29919 | 24.2  | 624   | 2.4   | 0.0097 |

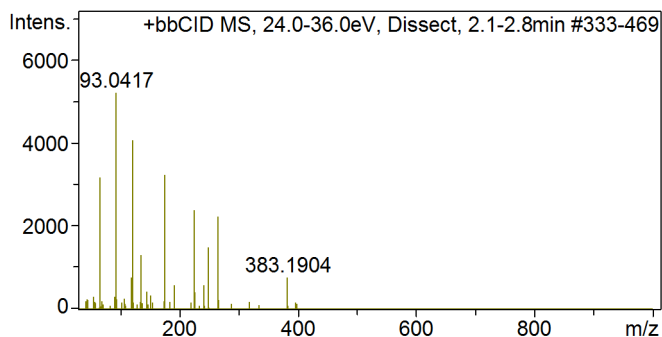

| #  | m/z      | Res.  | S/N   | I    | I %   | FWHM   |
|----|----------|-------|-------|------|-------|--------|
| 1  | 66.0316  | 17219 | 606.9 | 3162 | 60.7  | 0.0038 |
| 2  | 93.0417  | 19866 | 999.3 | 5206 | 100.0 | 0.0047 |
| 3  | 119.0563 | 23268 | 148.3 | 773  | 14.8  | 0.0051 |
| 4  | 121.0355 | 23496 | 780.4 | 4066 | 78.1  | 0.0052 |
| 5  | 134.9982 | 25412 | 251.6 | 1311 | 25.2  | 0.0053 |
| 6  | 176.0598 | 27889 | 621.3 | 3237 | 62.2  | 0.0063 |
| 7  | 226.0374 | 29933 | 457.8 | 2385 | 45.8  | 0.0076 |
| 8  | 250.0712 | 30799 | 286.9 | 1495 | 28.7  | 0.0081 |
| 9  | 266.0446 | 30890 | 429.0 | 2235 | 42.9  | 0.0086 |
| 10 | 383.1904 | 31626 | 149.5 | 779  | 15.0  | 0.0121 |

# Compound Spectrum List Report

## Cmpd 12, Dissect, 2.6 min

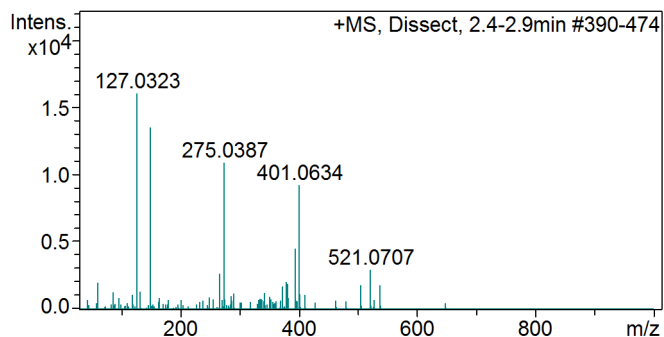

| #  | m/z      | Res.  | S/N   | I     | I %   | FWHM   |
|----|----------|-------|-------|-------|-------|--------|
| 1  | 61.0084  | 16533 | 126.2 | 2025  | 12.6  | 0.0037 |
| 2  | 127.0323 | 23754 | 999.4 | 16040 | 100.0 | 0.0053 |
| 3  | 149.0135 | 25623 | 840.9 | 13496 | 84.1  | 0.0058 |
| 4  | 267.0498 | 28207 | 166.8 | 2677  | 16.7  | 0.0095 |
| 5  | 275.0387 | 30126 | 677.1 | 10868 | 67.8  | 0.0091 |
| 6  | 379.0698 | 33252 | 129.8 | 2084  | 13.0  | 0.0114 |
| 7  | 381.2844 | 30855 | 119.8 | 1923  | 12.0  | 0.0124 |
| 8  | 395.0462 | 30578 | 280.7 | 4506  | 28.1  | 0.0129 |
| 9  | 401.0634 | 31221 | 574.2 | 9215  | 57.5  | 0.0128 |
| 10 | 521.0707 | 32155 | 184.2 | 2957  | 18.4  | 0.0162 |

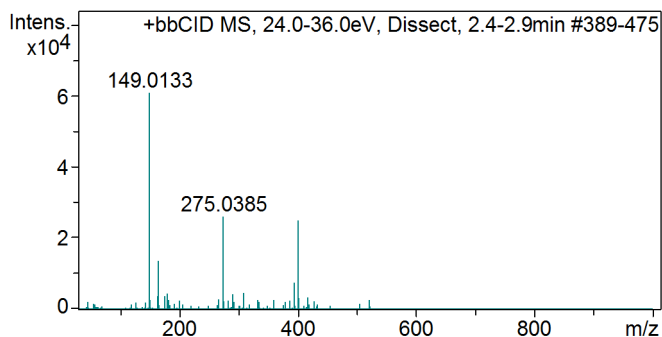

| #  | m/z      | Res.  | S/N   | I     | I %   | FWHM   |
|----|----------|-------|-------|-------|-------|--------|
| 1  | 149.0133 | 26559 | 998.3 | 60840 | 100.0 | 0.0056 |
| 2  | 164.9145 | 27020 | 63.3  | 3858  | 6.3   | 0.0061 |
| 3  | 164.9867 | 26903 | 224.2 | 13664 | 22.5  | 0.0061 |
| 4  | 176.0597 | 27322 | 62.2  | 3793  | 6.2   | 0.0064 |
| 5  | 180.9602 | 27883 | 74.4  | 4534  | 7.5   | 0.0065 |
| 6  | 275.0385 | 30817 | 429.5 | 26176 | 43.0  | 0.0089 |
| 7  | 291.0111 | 24543 | 70.8  | 4316  | 7.1   | 0.0119 |
| 8  | 309.0127 | 30665 | 78.6  | 4791  | 7.9   | 0.0101 |
| 9  | 395.0462 | 31373 | 125.7 | 7660  | 12.6  | 0.0126 |
| 10 | 401.0630 | 31145 | 411.5 | 25077 | 41.2  | 0.0129 |

## Cmpd 13, Dissect, 2.9 min

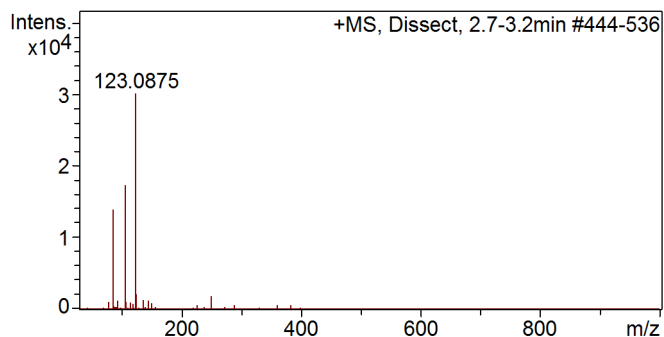

| #  | m/z      | Res.  | S/N   | I     | I %   | FWHM   |
|----|----------|-------|-------|-------|-------|--------|
| 1  | 79.0184  | 18413 | 33.4  | 1010  | 3.3   | 0.0043 |
| 2  | 86.0570  | 19579 | 460.9 | 13934 | 46.2  | 0.0044 |
| 3  | 94.0622  | 20807 | 41.1  | 1242  | 4.1   | 0.0045 |
| 4  | 106.0615 | 22099 | 572.2 | 17298 | 57.3  | 0.0048 |
| 5  | 107.0657 | 19840 | 34.8  | 1052  | 3.5   | 0.0054 |
| 6  | 123.0875 | 24064 | 998.5 | 30186 | 100.0 | 0.0051 |
| 7  | 124.0909 | 22680 | 72.6  | 2194  | 7.3   | 0.0055 |
| 8  | 136.0573 | 24656 | 44.0  | 1329  | 4.4   | 0.0055 |
| 9  | 145.0597 | 26338 | 40.9  | 1236  | 4.1   | 0.0055 |
| 10 | 251.0553 | 29244 | 63.0  | 1904  | 6.3   | 0.0086 |

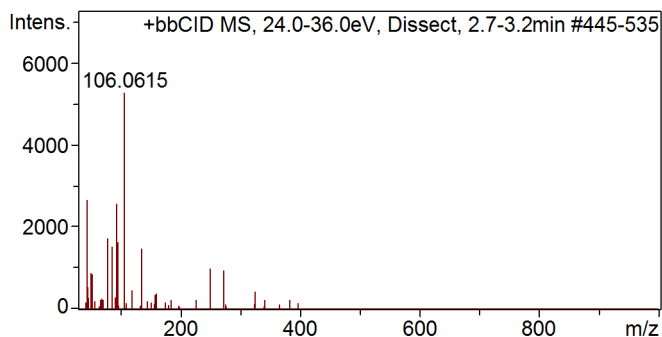

| #  | m/z      | Res.  | S/N   | I    | I %   | FWHM   |
|----|----------|-------|-------|------|-------|--------|
| 1  | 44.0112  | 15488 | 502.9 | 2660 | 50.5  | 0.0028 |
| 2  | 44.0476  | 15423 | 188.1 | 995  | 18.9  | 0.0029 |
| 3  | 78.0309  | 17393 | 327.5 | 1732 | 32.9  | 0.0045 |
| 4  | 86.0570  | 20138 | 289.7 | 1532 | 29.1  | 0.0043 |
| 5  | 94.0622  | 19661 | 486.1 | 2571 | 48.8  | 0.0048 |
| 6  | 96.0411  | 19910 | 309.0 | 1634 | 31.0  | 0.0048 |
| 7  | 106.0615 | 21368 | 996.3 | 5270 | 100.0 | 0.0050 |
| 8  | 134.9981 | 25815 | 280.2 | 1482 | 28.1  | 0.0052 |
| 9  | 251.0552 | 31153 | 189.7 | 1004 | 19.0  | 0.0081 |
| 10 | 273.0363 | 32130 | 180.7 | 956  | 18.1  | 0.0085 |

# Compound Spectrum List Report

## Cmpd 14, Dissect, 3.1 min

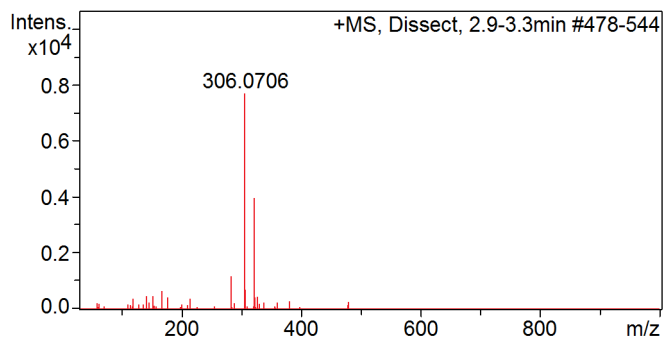

| #  | m/z      | Res.  | S/N   | I    | I %   | FWHM   |
|----|----------|-------|-------|------|-------|--------|
| 1  | 142.1176 | 25625 | 64.5  | 498  | 6.5   | 0.0055 |
| 2  | 152.0514 | 26217 | 62.7  | 483  | 6.3   | 0.0058 |
| 3  | 168.0577 | 26993 | 88.0  | 679  | 8.8   | 0.0062 |
| 4  | 284.0896 | 28740 | 154.5 | 1191 | 15.5  | 0.0099 |
| 5  | 306.0706 | 31330 | 999.9 | 7709 | 100.0 | 0.0098 |
| 6  | 307.0338 | 34163 | 68.4  | 527  | 6.8   | 0.0090 |
| 7  | 307.0735 | 26609 | 94.0  | 725  | 9.4   | 0.0115 |
| 8  | 322.0436 | 30474 | 514.6 | 3967 | 51.5  | 0.0106 |
| 9  | 323.0464 | 30482 | 58.3  | 450  | 5.8   | 0.0106 |
| 10 | 328.0518 | 32032 | 60.6  | 467  | 6.1   | 0.0102 |

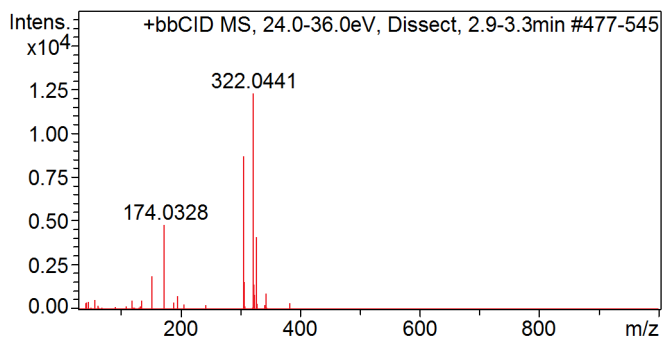

| #  | m/z      | Res.  | S/N   | I     | I %   | FWHM   |
|----|----------|-------|-------|-------|-------|--------|
| 1  | 152.0512 | 26693 | 153.8 | 1890  | 15.4  | 0.0057 |
| 2  | 174.0328 | 27742 | 389.6 | 4790  | 39.0  | 0.0063 |
| 3  | 306.0704 | 31653 | 705.5 | 8674  | 70.7  | 0.0097 |
| 4  | 307.0336 | 31815 | 86.5  | 1064  | 8.7   | 0.0097 |
| 5  | 307.0729 | 30223 | 126.8 | 1560  | 12.7  | 0.0102 |
| 6  | 322.0441 | 31537 | 998.5 | 12277 | 100.0 | 0.0102 |
| 7  | 323.0470 | 28485 | 115.7 | 1423  | 11.6  | 0.0113 |
| 8  | 324.0450 | 26787 | 68.4  | 841   | 6.8   | 0.0121 |
| 9  | 328.0514 | 33597 | 335.7 | 4128  | 33.6  | 0.0098 |
| 10 | 344.0256 | 34435 | 75.1  | 924   | 7.5   | 0.0100 |

## Cmpd 15, Dissect, 3.1 min

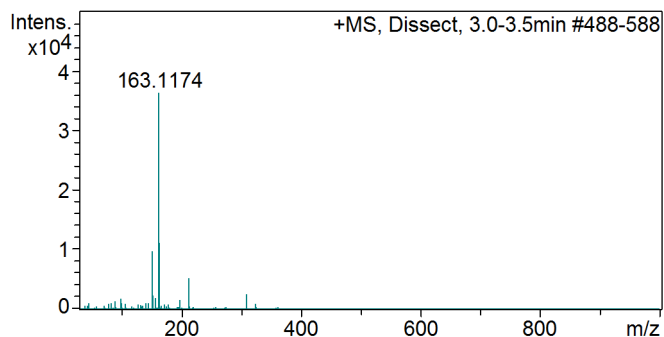

| #  | m/z      | Res.  | S/N   | I     | I %   | FWHM   |
|----|----------|-------|-------|-------|-------|--------|
| 1  | 99.0411  | 20040 | 51.2  | 1862  | 5.1   | 0.0049 |
| 2  | 151.0914 | 25663 | 269.4 | 9790  | 26.9  | 0.0059 |
| 3  | 152.0514 | 27067 | 67.7  | 2460  | 6.8   | 0.0056 |
| 4  | 157.0782 | 26079 | 54.9  | 1995  | 5.5   | 0.0060 |
| 5  | 163.1174 | 27567 | 999.9 | 36342 | 100.0 | 0.0059 |
| 6  | 164.1014 | 27013 | 307.8 | 11187 | 30.8  | 0.0061 |
| 7  | 164.1206 | 26094 | 114.7 | 4170  | 11.5  | 0.0063 |
| 8  | 198.1037 | 28993 | 43.8  | 1593  | 4.4   | 0.0068 |
| 9  | 213.0951 | 28686 | 144.9 | 5266  | 14.5  | 0.0074 |
| 10 | 309.0841 | 31266 | 71.3  | 2590  | 7.1   | 0.0099 |

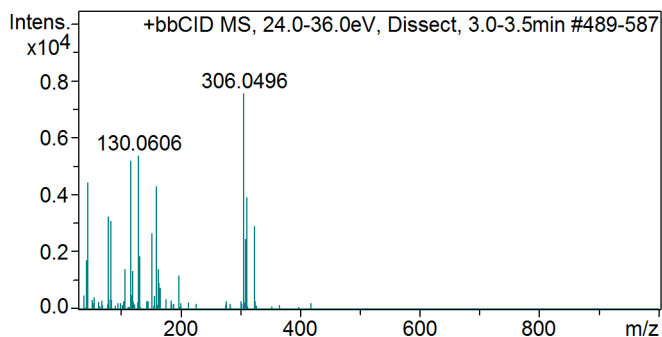

| #  | m/z      | Res.  | S/N   | I    | I %   | FWHM   |
|----|----------|-------|-------|------|-------|--------|
| 1  | 45.0315  | 15842 | 585.0 | 4425 | 58.5  | 0.0028 |
| 2  | 80.0467  | 19011 | 428.0 | 3237 | 42.8  | 0.0042 |
| 3  | 84.0778  | 19114 | 409.4 | 3097 | 41.0  | 0.0044 |
| 4  | 117.0533 | 23365 | 685.7 | 5187 | 68.6  | 0.0050 |
| 5  | 130.0606 | 24493 | 709.4 | 5366 | 71.0  | 0.0053 |
| 6  | 161.0129 | 27477 | 568.0 | 4297 | 56.8  | 0.0059 |
| 7  | 306.0496 | 30277 | 999.6 | 7561 | 100.0 | 0.0101 |
| 8  | 306.0706 | 31834 | 411.5 | 3113 | 41.2  | 0.0096 |
| 9  | 312.0575 | 31514 | 517.5 | 3914 | 51.8  | 0.0099 |
| 10 | 325.0576 | 28994 | 385.6 | 2916 | 38.6  | 0.0112 |



# Compound Spectrum List Report

## Cmpd 16, Dissect, 3.3 min

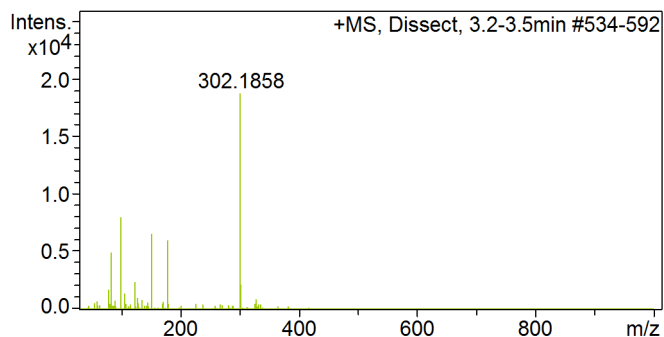

| #  | m/z      | Res.  | S/N   | I     | I %   | FWHM   |
|----|----------|-------|-------|-------|-------|--------|
| 1  | 79.0184  | 18490 | 92.8  | 1743  | 9.3   | 0.0043 |
| 2  | 83.0826  | 18913 | 262.8 | 4937  | 26.4  | 0.0044 |
| 3  | 100.1088 | 20439 | 427.1 | 8023  | 42.8  | 0.0049 |
| 4  | 106.0616 | 22310 | 76.4  | 1434  | 7.7   | 0.0048 |
| 5  | 123.0875 | 23661 | 129.3 | 2430  | 13.0  | 0.0052 |
| 6  | 151.0815 | 26018 | 349.5 | 6565  | 35.1  | 0.0058 |
| 7  | 151.0907 | 27514 | 75.3  | 1415  | 7.6   | 0.0055 |
| 8  | 179.1116 | 27802 | 318.8 | 5988  | 32.0  | 0.0064 |
| 9  | 302.1858 | 32113 | 996.8 | 18725 | 100.0 | 0.0094 |
| 10 | 303.1892 | 29179 | 117.3 | 2203  | 11.8  | 0.0104 |

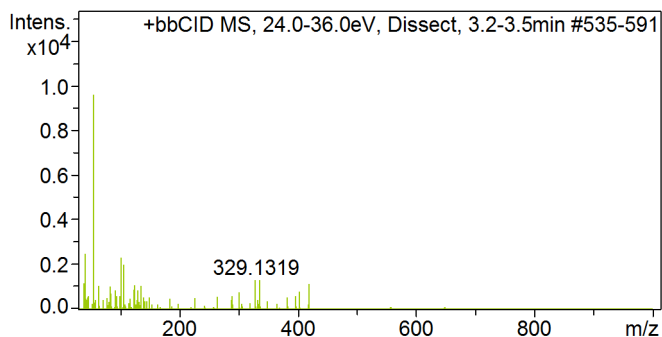

| #  | m/z      | Res.  | S/N   | I    | I %   | FWHM   |
|----|----------|-------|-------|------|-------|--------|
| 1  | 38.9615  | 14684 | 123.3 | 1186 | 12.3  | 0.0027 |
| 2  | 41.0368  | 15166 | 258.4 | 2485 | 25.8  | 0.0027 |
| 3  | 55.0520  | 17031 | 999.9 | 9618 | 100.0 | 0.0032 |
| 4  | 102.0879 | 21319 | 243.0 | 2337 | 24.3  | 0.0048 |
| 5  | 106.0616 | 22015 | 209.2 | 2013 | 20.9  | 0.0048 |
| 6  | 123.9364 | 24784 | 114.1 | 1098 | 11.4  | 0.0050 |
| 7  | 134.9982 | 25299 | 112.6 | 1083 | 11.3  | 0.0053 |
| 8  | 329.1319 | 36348 | 139.2 | 1339 | 13.9  | 0.0091 |
| 9  | 336.0603 | 31507 | 136.8 | 1316 | 13.7  | 0.0107 |
| 10 | 419.1037 | 33791 | 119.5 | 1149 | 12.0  | 0.0124 |

## Cmpd 17, Dissect, 3.4 min

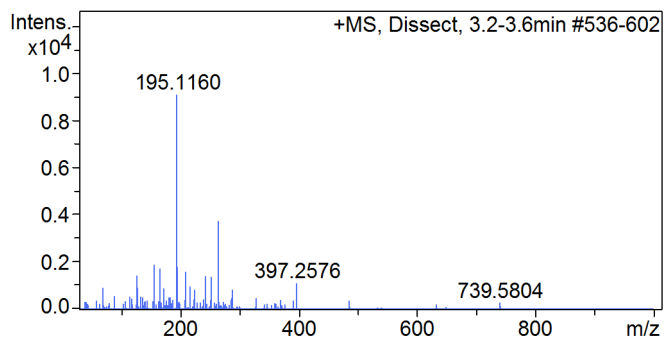

| #  | m/z      | Res.  | S/N   | I    | I %   | FWHM   |
|----|----------|-------|-------|------|-------|--------|
| 1  | 127.0456 | 24192 | 159.8 | 1456 | 16.0  | 0.0053 |
| 2  | 156.1328 | 26963 | 208.8 | 1903 | 20.9  | 0.0058 |
| 3  | 166.0803 | 26845 | 191.6 | 1746 | 19.2  | 0.0062 |
| 4  | 195.1160 | 28912 | 999.4 | 9109 | 100.0 | 0.0067 |
| 5  | 196.1238 | 24116 | 197.0 | 1796 | 19.7  | 0.0081 |
| 6  | 210.0428 | 28446 | 177.2 | 1615 | 17.7  | 0.0074 |
| 7  | 243.1750 | 32334 | 155.8 | 1420 | 15.6  | 0.0075 |
| 8  | 253.1198 | 29507 | 153.3 | 1397 | 15.3  | 0.0086 |
| 9  | 265.0705 | 30156 | 411.5 | 3750 | 41.2  | 0.0088 |
| 10 | 397.2576 | 31832 | 123.3 | 1124 | 12.3  | 0.0125 |

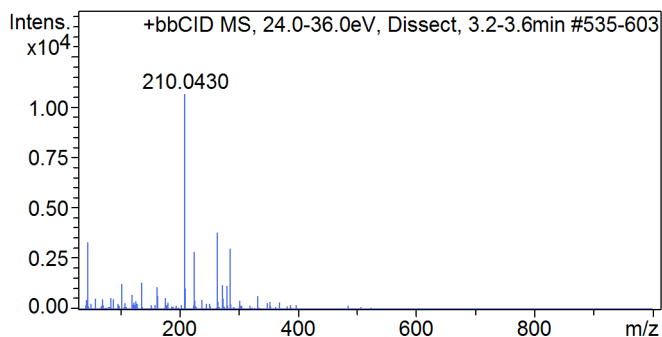

| #  | m/z      | Res.  | S/N   | I     | I %   | FWHM   |
|----|----------|-------|-------|-------|-------|--------|
| 1  | 45.0316  | 15810 | 311.5 | 3317  | 31.2  | 0.0028 |
| 2  | 103.0508 | 22008 | 119.1 | 1268  | 11.9  | 0.0047 |
| 3  | 136.0571 | 25109 | 126.3 | 1345  | 12.6  | 0.0054 |
| 4  | 163.0286 | 24545 | 105.2 | 1121  | 10.5  | 0.0066 |
| 5  | 210.0430 | 29400 | 999.7 | 10648 | 100.0 | 0.0071 |
| 6  | 226.0165 | 29584 | 267.0 | 2844  | 26.7  | 0.0076 |
| 7  | 265.0702 | 30329 | 355.6 | 3788  | 35.6  | 0.0087 |
| 8  | 274.0818 | 31931 | 113.7 | 1211  | 11.4  | 0.0086 |
| 9  | 281.0439 | 31744 | 111.3 | 1186  | 11.1  | 0.0089 |
| 10 | 287.0515 | 31181 | 283.3 | 3017  | 28.3  | 0.0092 |

# Compound Spectrum List Report

## Cmpd 18, Dissect, 3.4 min

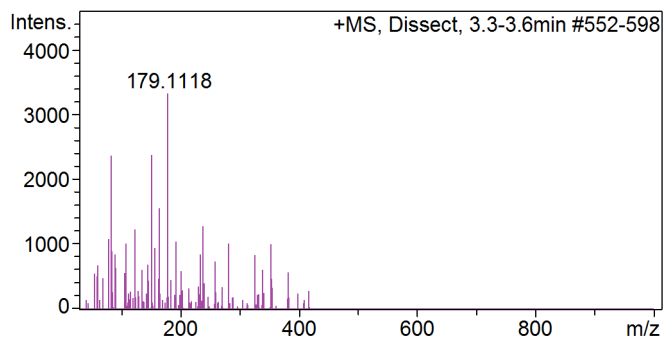

| #  | m/z      | Res.  | S/N   | I    | I %   | FWHM   |
|----|----------|-------|-------|------|-------|--------|
| 1  | 79.0184  | 18635 | 325.8 | 1086 | 32.6  | 0.0042 |
| 2  | 83.0825  | 19322 | 708.2 | 2361 | 70.9  | 0.0043 |
| 3  | 107.9631 | 23560 | 304.6 | 1015 | 30.5  | 0.0046 |
| 4  | 123.0874 | 23945 | 369.4 | 1231 | 37.0  | 0.0051 |
| 5  | 151.0812 | 25449 | 638.7 | 2129 | 63.9  | 0.0059 |
| 6  | 151.0912 | 25917 | 710.8 | 2370 | 71.1  | 0.0058 |
| 7  | 165.0967 | 26416 | 466.7 | 1556 | 46.7  | 0.0062 |
| 8  | 179.1118 | 25666 | 999.4 | 3332 | 100.0 | 0.0070 |
| 9  | 193.1271 | 25347 | 314.5 | 1048 | 31.5  | 0.0076 |
| 10 | 239.1409 | 31143 | 385.6 | 1286 | 38.6  | 0.0077 |

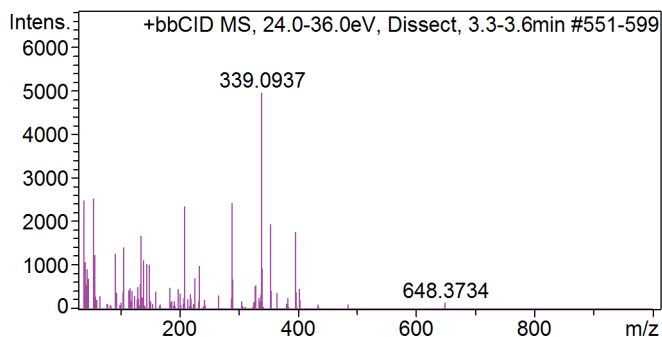

| #  | m/z      | Res.  | S/N    | I    | I %   | FWHM   |
|----|----------|-------|--------|------|-------|--------|
| 1  | 38.9614  | 14817 | 503.1  | 2491 | 50.3  | 0.0026 |
| 2  | 55.0520  | 16754 | 510.4  | 2527 | 51.0  | 0.0033 |
| 3  | 92.0463  | 20021 | 258.6  | 1280 | 25.9  | 0.0046 |
| 4  | 106.0616 | 21492 | 287.8  | 1425 | 28.8  | 0.0049 |
| 5  | 134.9980 | 25072 | 341.2  | 1689 | 34.1  | 0.0054 |
| 6  | 210.0431 | 29131 | 476.0  | 2356 | 47.6  | 0.0072 |
| 7  | 290.0761 | 31272 | 491.9  | 2435 | 49.2  | 0.0093 |
| 8  | 339.0937 | 32308 | 1000.0 | 4951 | 100.0 | 0.0105 |
| 9  | 355.0669 | 28892 | 393.7  | 1949 | 39.4  | 0.0123 |
| 10 | 397.2576 | 31887 | 357.8  | 1772 | 35.8  | 0.0125 |

## Cmpd 19, Dissect, 3.5 min

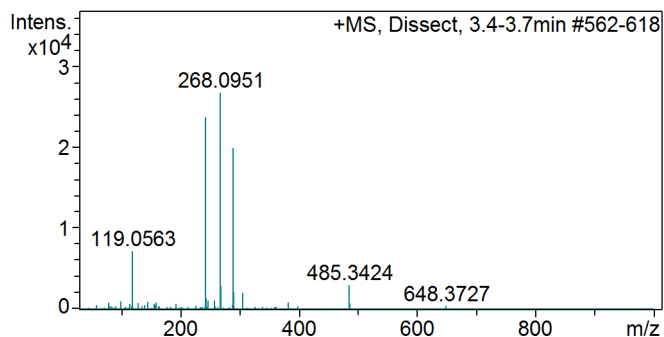

| #  | m/z      | Res.  | S/N   | I     | I %   | FWHM   |
|----|----------|-------|-------|-------|-------|--------|
| 1  | 119.0563 | 23533 | 270.3 | 7237  | 27.1  | 0.0051 |
| 2  | 243.1750 | 33149 | 883.5 | 23654 | 88.5  | 0.0073 |
| 3  | 243.6766 | 31994 | 268.0 | 7176  | 26.8  | 0.0076 |
| 4  | 244.1783 | 29918 | 54.7  | 1465  | 5.5   | 0.0082 |
| 5  | 268.0951 | 32362 | 998.4 | 26730 | 100.0 | 0.0083 |
| 6  | 269.0980 | 26681 | 110.0 | 2945  | 11.0  | 0.0101 |
| 7  | 290.0763 | 32318 | 741.8 | 19861 | 74.3  | 0.0090 |
| 8  | 291.0790 | 27392 | 80.1  | 2144  | 8.0   | 0.0106 |
| 9  | 306.0497 | 31130 | 78.6  | 2104  | 7.9   | 0.0098 |
| 10 | 485.3424 | 33895 | 112.8 | 3020  | 11.3  | 0.0143 |

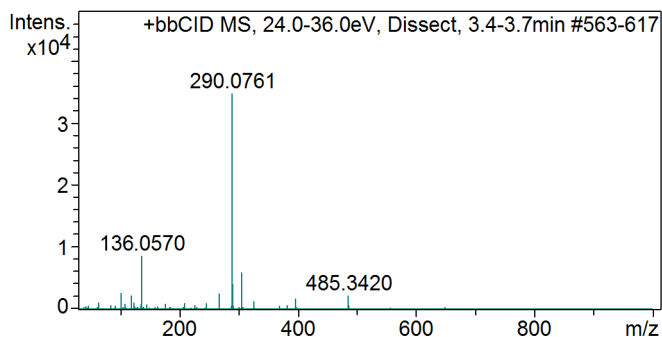

| #  | m/z      | Res.  | S/N   | I     | I %   | FWHM   |
|----|----------|-------|-------|-------|-------|--------|
| 1  | 102.0879 | 20106 | 78.7  | 2775  | 8.0   | 0.0051 |
| 2  | 119.0564 | 23168 | 67.0  | 2362  | 6.8   | 0.0051 |
| 3  | 136.0570 | 25593 | 244.9 | 8638  | 24.8  | 0.0053 |
| 4  | 268.0951 | 29400 | 75.6  | 2667  | 7.7   | 0.0091 |
| 5  | 290.0761 | 31782 | 987.7 | 34844 | 100.0 | 0.0091 |
| 6  | 291.0791 | 26936 | 117.3 | 4137  | 11.9  | 0.0108 |
| 7  | 306.0495 | 30771 | 169.6 | 5982  | 17.2  | 0.0099 |
| 8  | 326.3668 | 32434 | 36.2  | 1277  | 3.7   | 0.0101 |
| 9  | 397.2577 | 30766 | 50.2  | 1770  | 5.1   | 0.0129 |
| 10 | 485.3420 | 30583 | 66.0  | 2328  | 6.7   | 0.0159 |

# Compound Spectrum List Report

## Cmpd 20, Dissect, 3.6 min

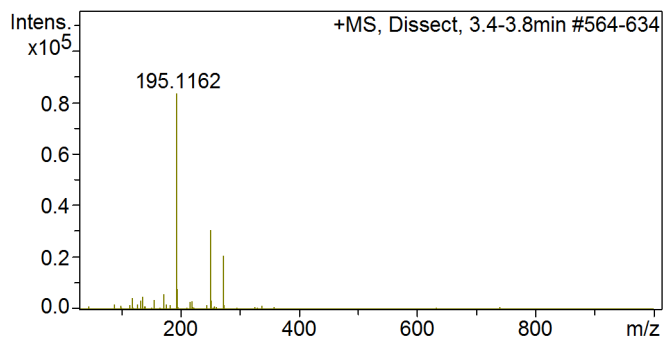

| #  | m/z      | Res.  | S/N   | I     | I %   | FWHM   |
|----|----------|-------|-------|-------|-------|--------|
| 1  | 119.0564 | 23503 | 55.4  | 4634  | 5.5   | 0.0051 |
| 2  | 133.0813 | 24072 | 39.4  | 3297  | 3.9   | 0.0055 |
| 3  | 136.0572 | 24877 | 61.5  | 5139  | 6.2   | 0.0055 |
| 4  | 156.0965 | 26360 | 41.6  | 3476  | 4.2   | 0.0059 |
| 5  | 173.1227 | 26025 | 71.9  | 6013  | 7.2   | 0.0067 |
| 6  | 195.1162 | 29548 | 999.1 | 83536 | 100.0 | 0.0066 |
| 7  | 196.1195 | 29089 | 94.9  | 7933  | 9.5   | 0.0067 |
| 8  | 252.1008 | 31884 | 367.2 | 30703 | 36.8  | 0.0079 |
| 9  | 253.1037 | 24188 | 39.9  | 3335  | 4.0   | 0.0105 |
| 10 | 274.0819 | 32023 | 248.4 | 20766 | 24.9  | 0.0086 |

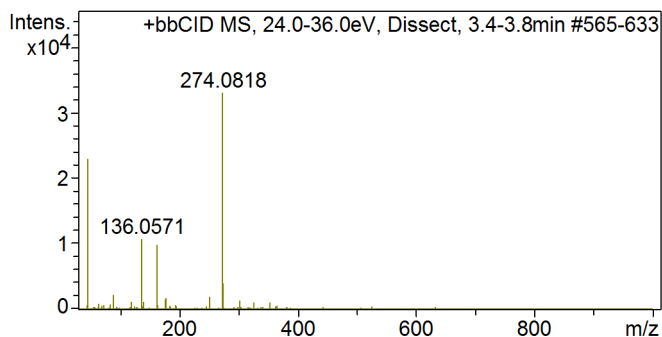

| #  | m/z      | Res.  | S/N   | I     | I %   | FWHM   |
|----|----------|-------|-------|-------|-------|--------|
| 1  | 45.0316  | 15695 | 694.0 | 22933 | 69.4  | 0.0029 |
| 2  | 89.0569  | 18481 | 68.7  | 2271  | 6.9   | 0.0048 |
| 3  | 136.0571 | 25265 | 325.5 | 10757 | 32.6  | 0.0054 |
| 4  | 163.0285 | 27299 | 298.6 | 9867  | 29.9  | 0.0060 |
| 5  | 177.0070 | 28636 | 49.5  | 1636  | 5.0   | 0.0062 |
| 6  | 179.0020 | 26691 | 53.6  | 1772  | 5.4   | 0.0067 |
| 7  | 252.1003 | 28941 | 60.6  | 2003  | 6.1   | 0.0087 |
| 8  | 274.0818 | 31998 | 999.7 | 33036 | 100.0 | 0.0086 |
| 9  | 275.0849 | 27848 | 121.2 | 4004  | 12.1  | 0.0099 |
| 10 | 303.0689 | 31284 | 38.6  | 1277  | 3.9   | 0.0097 |

## Cmpd 21, Dissect, 3.7 min

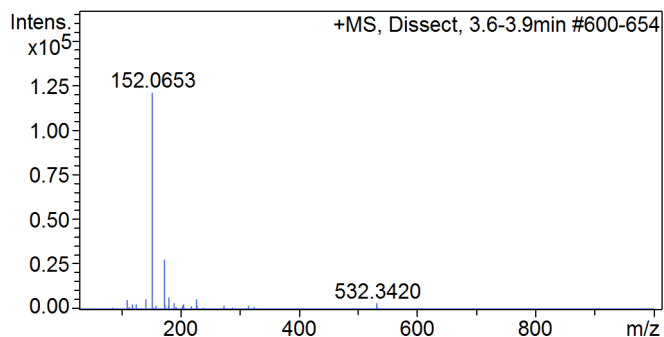

| #  | m/z      | Res.  | S/N   | I      | I %   | FWHM   |
|----|----------|-------|-------|--------|-------|--------|
| 1  | 110.0562 | 22999 | 42.8  | 5169   | 4.3   | 0.0048 |
| 2  | 119.0563 | 23537 | 23.5  | 2838   | 2.3   | 0.0051 |
| 3  | 142.0814 | 25642 | 47.7  | 5771   | 4.8   | 0.0055 |
| 4  | 152.0653 | 27129 | 999.1 | 120795 | 100.0 | 0.0056 |
| 5  | 153.0686 | 25685 | 59.5  | 7194   | 6.0   | 0.0060 |
| 6  | 174.0466 | 28378 | 230.6 | 27876  | 23.1  | 0.0061 |
| 7  | 182.0724 | 27253 | 58.4  | 7066   | 5.8   | 0.0067 |
| 8  | 190.0198 | 27130 | 27.2  | 3286   | 2.7   | 0.0070 |
| 9  | 228.1129 | 28657 | 49.7  | 6003   | 5.0   | 0.0080 |
| 10 | 532.3420 | 31372 | 26.6  | 3215   | 2.7   | 0.0170 |

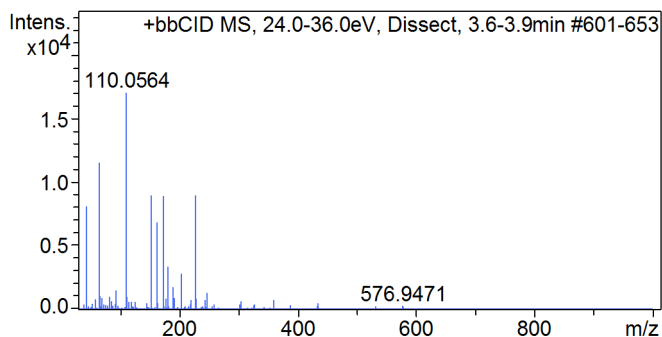

| #  | m/z      | Res.  | S/N   | I     | I %   | FWHM   |
|----|----------|-------|-------|-------|-------|--------|
| 1  | 43.0160  | 15300 | 475.7 | 8107  | 47.6  | 0.0028 |
| 2  | 43.0525  | 15386 | 116.7 | 1989  | 11.7  | 0.0028 |
| 3  | 65.0363  | 17110 | 676.9 | 11535 | 67.7  | 0.0038 |
| 4  | 110.0564 | 21947 | 999.4 | 17031 | 100.0 | 0.0050 |
| 5  | 152.0653 | 26458 | 525.6 | 8957  | 52.6  | 0.0057 |
| 6  | 163.0286 | 27162 | 402.0 | 6851  | 40.2  | 0.0060 |
| 7  | 174.0467 | 27416 | 522.1 | 8898  | 52.2  | 0.0063 |
| 8  | 182.0727 | 27587 | 198.4 | 3380  | 19.8  | 0.0066 |
| 9  | 204.0537 | 29261 | 167.4 | 2853  | 16.8  | 0.0070 |
| 10 | 228.1132 | 29183 | 524.8 | 8944  | 52.5  | 0.0078 |

# Compound Spectrum List Report

## Cmpd 22, Dissect, 3.7 min

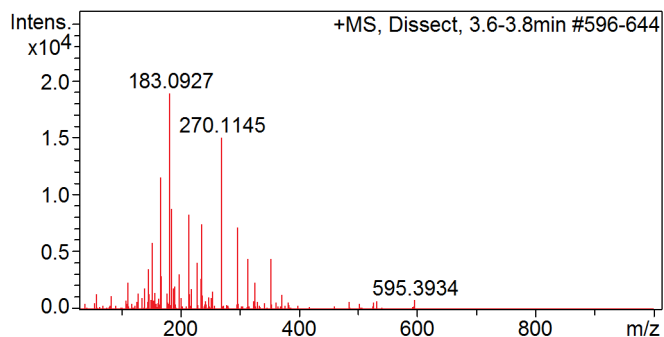

| #  | m/z      | Res.  | S/N   | I     | I %   | FWHM   |
|----|----------|-------|-------|-------|-------|--------|
| 1  | 153.0687 | 25789 | 308.3 | 5841  | 30.9  | 0.0059 |
| 2  | 168.0944 | 25030 | 608.2 | 11522 | 60.9  | 0.0067 |
| 3  | 183.0927 | 28120 | 998.2 | 18912 | 100.0 | 0.0065 |
| 4  | 186.1063 | 27045 | 462.4 | 8761  | 46.3  | 0.0069 |
| 5  | 215.1175 | 28546 | 436.3 | 8266  | 43.7  | 0.0075 |
| 6  | 237.0993 | 29082 | 392.1 | 7429  | 39.3  | 0.0082 |
| 7  | 270.1145 | 29607 | 790.9 | 14985 | 79.2  | 0.0091 |
| 8  | 297.1449 | 30568 | 377.1 | 7145  | 37.8  | 0.0097 |
| 9  | 314.1705 | 30992 | 233.2 | 4419  | 23.4  | 0.0101 |
| 10 | 353.2542 | 32729 | 234.6 | 4446  | 23.5  | 0.0108 |

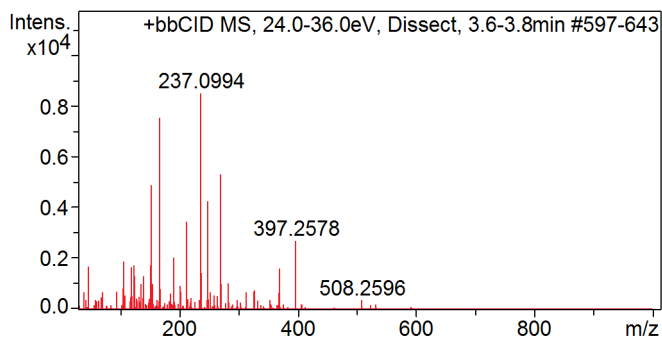

| #  | m/z      | Res.  | S/N   | I    | I %   | FWHM   |
|----|----------|-------|-------|------|-------|--------|
| 1  | 106.0616 | 21893 | 224.0 | 1906 | 22.4  | 0.0048 |
| 2  | 153.0833 | 24479 | 573.4 | 4881 | 57.4  | 0.0063 |
| 3  | 168.0939 | 27444 | 884.4 | 7528 | 88.5  | 0.0061 |
| 4  | 191.0227 | 28466 | 241.5 | 2056 | 24.2  | 0.0067 |
| 5  | 213.0039 | 27302 | 406.9 | 3464 | 40.7  | 0.0078 |
| 6  | 213.1014 | 25650 | 222.8 | 1896 | 22.3  | 0.0083 |
| 7  | 237.0994 | 29947 | 999.8 | 8511 | 100.0 | 0.0079 |
| 8  | 249.0525 | 27902 | 499.6 | 4252 | 50.0  | 0.0089 |
| 9  | 270.1151 | 28908 | 624.8 | 5318 | 62.5  | 0.0093 |
| 10 | 397.2578 | 31720 | 318.4 | 2710 | 31.8  | 0.0125 |

## Cmpd 23, Dissect, 3.8 min

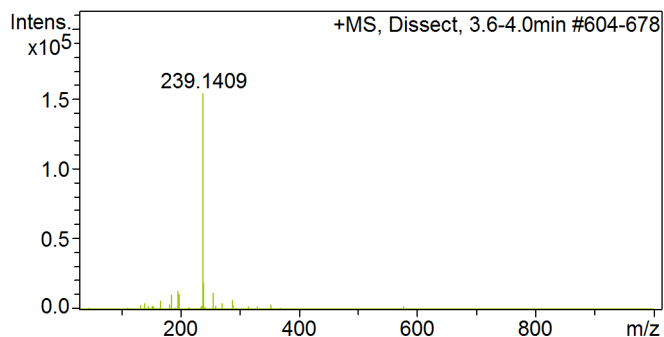

| #  | m/z      | Res.  | S/N   | I      | I %   | FWHM   |
|----|----------|-------|-------|--------|-------|--------|
| 1  | 168.0945 | 24340 | 38.8  | 5981   | 3.9   | 0.0069 |
| 2  | 186.1062 | 27804 | 68.1  | 10507  | 6.8   | 0.0067 |
| 3  | 197.1581 | 28659 | 88.3  | 13633  | 8.9   | 0.0069 |
| 4  | 199.1161 | 28683 | 71.7  | 11060  | 7.2   | 0.0069 |
| 5  | 239.1409 | 29405 | 997.6 | 153966 | 100.0 | 0.0081 |
| 6  | 240.1301 | 28957 | 49.5  | 7641   | 5.0   | 0.0083 |
| 7  | 240.1440 | 28991 | 124.1 | 19152  | 12.4  | 0.0083 |
| 8  | 256.1667 | 30122 | 78.5  | 12118  | 7.9   | 0.0085 |
| 9  | 271.1711 | 29348 | 27.3  | 4209   | 2.7   | 0.0092 |
| 10 | 289.1972 | 32349 | 42.9  | 6617   | 4.3   | 0.0089 |

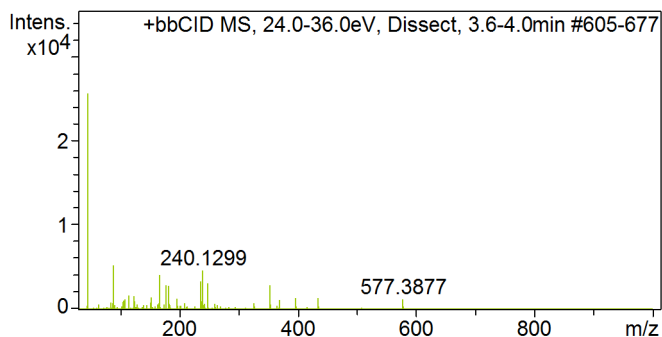

| #  | m/z      | Res.  | S/N   | I     | I %   | FWHM   |
|----|----------|-------|-------|-------|-------|--------|
| 1  | 45.0316  | 15717 | 998.7 | 25675 | 100.0 | 0.0029 |
| 2  | 89.0568  | 18951 | 204.1 | 5248  | 20.4  | 0.0047 |
| 3  | 115.0826 | 21863 | 67.7  | 1740  | 6.8   | 0.0053 |
| 4  | 168.0939 | 27557 | 161.8 | 4159  | 16.2  | 0.0061 |
| 5  | 178.1167 | 27239 | 113.0 | 2905  | 11.3  | 0.0065 |
| 6  | 183.0975 | 24226 | 109.2 | 2807  | 10.9  | 0.0076 |
| 7  | 237.0993 | 30380 | 130.6 | 3357  | 13.1  | 0.0078 |
| 8  | 240.1299 | 28679 | 180.0 | 4628  | 18.0  | 0.0084 |
| 9  | 249.0527 | 28928 | 122.4 | 3148  | 12.3  | 0.0086 |
| 10 | 353.2542 | 33367 | 114.1 | 2934  | 11.4  | 0.0106 |

# Compound Spectrum List Report

## Cmpd 24, Dissect, 3.9 min

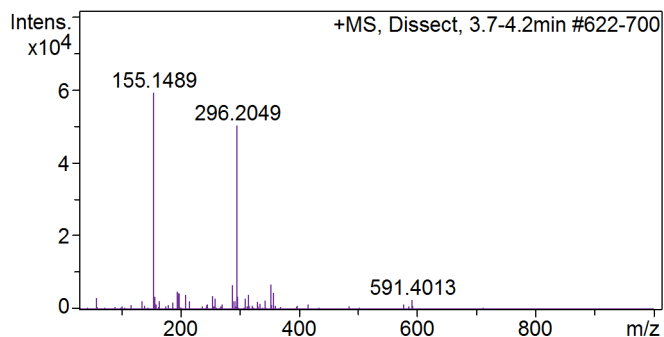

| #  | m/z      | Res.  | S/N   | I     | I %   | FWHM   |
|----|----------|-------|-------|-------|-------|--------|
| 1  | 155.1489 | 26697 | 996.9 | 59191 | 100.0 | 0.0058 |
| 2  | 196.1627 | 28096 | 84.5  | 5016  | 8.5   | 0.0070 |
| 3  | 197.1581 | 27328 | 78.1  | 4640  | 7.8   | 0.0072 |
| 4  | 199.1163 | 28891 | 75.9  | 4505  | 7.6   | 0.0069 |
| 5  | 289.1976 | 33338 | 112.8 | 6697  | 11.3  | 0.0087 |
| 6  | 296.1295 | 31061 | 84.0  | 4989  | 8.4   | 0.0095 |
| 7  | 296.2049 | 34843 | 843.8 | 50101 | 84.6  | 0.0085 |
| 8  | 296.7065 | 35105 | 292.1 | 17341 | 29.3  | 0.0085 |
| 9  | 353.2542 | 32692 | 114.7 | 6810  | 11.5  | 0.0108 |
| 10 | 358.1951 | 30899 | 78.8  | 4678  | 7.9   | 0.0116 |

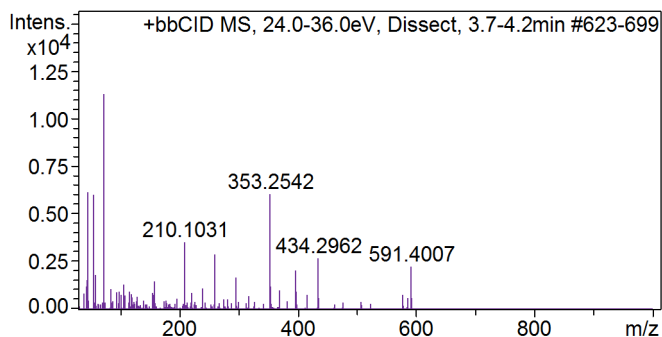

| #  | m/z      | Res.  | S/N    | I     | I %   | FWHM   |
|----|----------|-------|--------|-------|-------|--------|
| 1  | 46.0631  | 16158 | 543.8  | 6152  | 54.4  | 0.0029 |
| 2  | 55.0520  | 17128 | 530.1  | 5997  | 53.0  | 0.0032 |
| 3  | 59.0467  | 17627 | 162.3  | 1836  | 16.2  | 0.0033 |
| 4  | 73.0733  | 18469 | 1000.0 | 11313 | 100.0 | 0.0040 |
| 5  | 210.1031 | 27175 | 313.6  | 3547  | 31.4  | 0.0077 |
| 6  | 260.0785 | 29494 | 256.7  | 2905  | 25.7  | 0.0088 |
| 7  | 353.2542 | 33925 | 533.6  | 6037  | 53.4  | 0.0104 |
| 8  | 397.2577 | 31634 | 182.5  | 2064  | 18.2  | 0.0126 |
| 9  | 434.2962 | 29373 | 239.3  | 2708  | 23.9  | 0.0148 |
| 10 | 591.4007 | 33245 | 198.6  | 2247  | 19.9  | 0.0178 |

## Cmpd 25, Dissect, 4.0 min

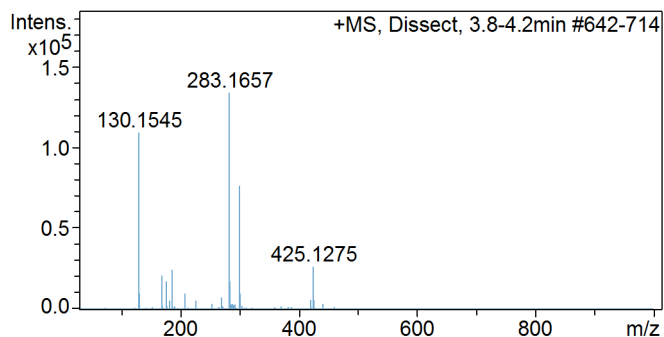

| #  | m/z      | Res.  | S/N   | I      | I %   | FWHM   |
|----|----------|-------|-------|--------|-------|--------|
| 1  | 130.1545 | 24415 | 812.7 | 108985 | 81.3  | 0.0053 |
| 2  | 170.1117 | 27405 | 157.4 | 21106  | 15.8  | 0.0062 |
| 3  | 170.1480 | 27365 | 77.2  | 10353  | 7.7   | 0.0062 |
| 4  | 177.0961 | 27409 | 130.7 | 17532  | 13.1  | 0.0065 |
| 5  | 187.1376 | 28275 | 185.3 | 24844  | 18.5  | 0.0066 |
| 6  | 283.1657 | 31994 | 999.2 | 133998 | 100.0 | 0.0089 |
| 7  | 284.1688 | 30238 | 130.0 | 17433  | 13.0  | 0.0094 |
| 8  | 300.1916 | 31940 | 569.2 | 76333  | 57.0  | 0.0094 |
| 9  | 301.1950 | 29276 | 74.0  | 9927   | 7.4   | 0.0103 |
| 10 | 425.1275 | 32787 | 198.1 | 26571  | 19.8  | 0.0130 |

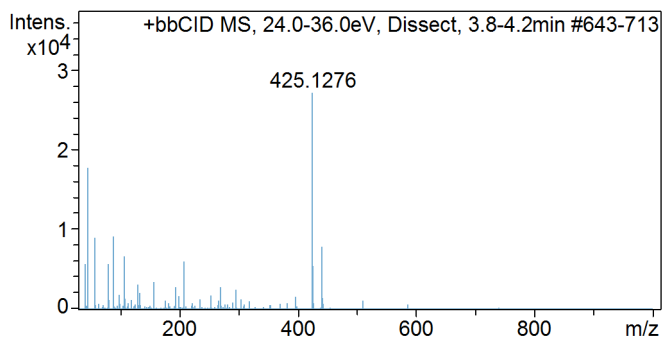

| #  | m/z      | Res.  | S/N   | I     | I %   | FWHM   |
|----|----------|-------|-------|-------|-------|--------|
| 1  | 41.0368  | 14920 | 211.7 | 5754  | 21.2  | 0.0028 |
| 2  | 45.0315  | 15689 | 652.2 | 17727 | 65.3  | 0.0029 |
| 3  | 57.0676  | 17032 | 331.3 | 9005  | 33.2  | 0.0034 |
| 4  | 80.0467  | 19037 | 209.9 | 5705  | 21.0  | 0.0042 |
| 5  | 89.0567  | 18674 | 336.5 | 9146  | 33.7  | 0.0048 |
| 6  | 107.0455 | 22130 | 244.6 | 6647  | 24.5  | 0.0048 |
| 7  | 209.1190 | 29182 | 222.5 | 6048  | 22.3  | 0.0072 |
| 8  | 425.1276 | 31979 | 999.1 | 27155 | 100.0 | 0.0133 |
| 9  | 426.1307 | 30874 | 202.5 | 5503  | 20.3  | 0.0138 |
| 10 | 441.1003 | 33665 | 289.2 | 7859  | 28.9  | 0.0131 |

# Compound Spectrum List Report

## Cmpd 26, Dissect, 4.1 min

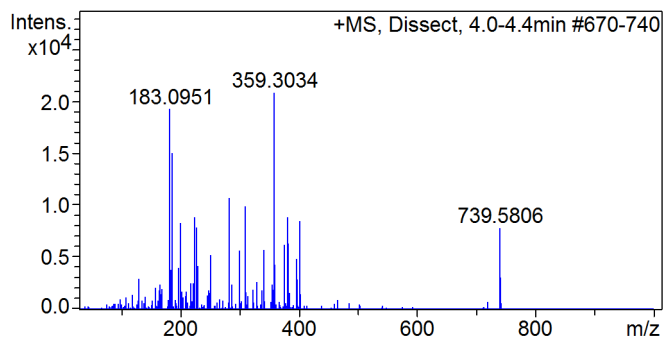

| #  | m/z      | Res.  | S/N   | I     | I %   | FWHM   |
|----|----------|-------|-------|-------|-------|--------|
| 1  | 183.0951 | 26954 | 924.0 | 19250 | 92.4  | 0.0068 |
| 2  | 187.1377 | 28249 | 720.5 | 15010 | 72.1  | 0.0066 |
| 3  | 201.1164 | 27357 | 399.9 | 8332  | 40.0  | 0.0074 |
| 4  | 225.1022 | 28154 | 424.4 | 8841  | 42.5  | 0.0080 |
| 5  | 228.1155 | 27780 | 378.5 | 7887  | 37.9  | 0.0082 |
| 6  | 283.1657 | 31564 | 513.2 | 10692 | 51.3  | 0.0090 |
| 7  | 310.1448 | 32490 | 475.8 | 9913  | 47.6  | 0.0095 |
| 8  | 359.3034 | 34772 | 999.5 | 20823 | 100.0 | 0.0103 |
| 9  | 381.2845 | 33691 | 426.7 | 8891  | 42.7  | 0.0113 |
| 10 | 402.2193 | 31239 | 407.8 | 8497  | 40.8  | 0.0129 |

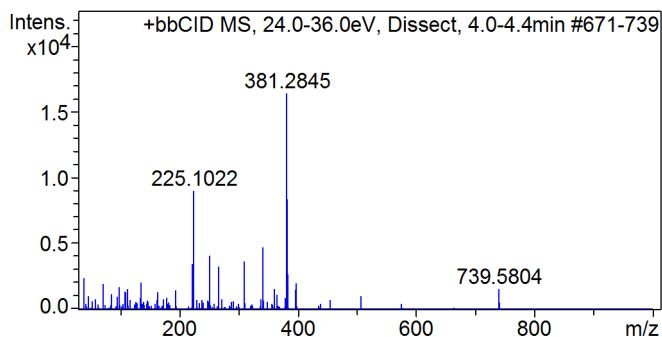

| #  | m/z      | Res.  | S/N   | I     | I %   | FWHM   |
|----|----------|-------|-------|-------|-------|--------|
| 1  | 38.9614  | 14673 | 146.6 | 2408  | 14.7  | 0.0027 |
| 2  | 223.0868 | 28198 | 211.7 | 3478  | 21.2  | 0.0079 |
| 3  | 225.1022 | 28527 | 548.3 | 9006  | 54.9  | 0.0079 |
| 4  | 252.1121 | 27771 | 249.6 | 4099  | 25.0  | 0.0091 |
| 5  | 267.2593 | 31276 | 198.9 | 3267  | 19.9  | 0.0085 |
| 6  | 310.1445 | 30965 | 222.8 | 3660  | 22.3  | 0.0100 |
| 7  | 341.2933 | 32883 | 288.3 | 4735  | 28.8  | 0.0104 |
| 8  | 381.2845 | 33183 | 999.3 | 16412 | 100.0 | 0.0115 |
| 9  | 382.2879 | 34618 | 510.1 | 8378  | 51.0  | 0.0110 |
| 10 | 383.2908 | 29858 | 163.1 | 2678  | 16.3  | 0.0128 |

## Cmpd 27, Dissect, 4.2 min

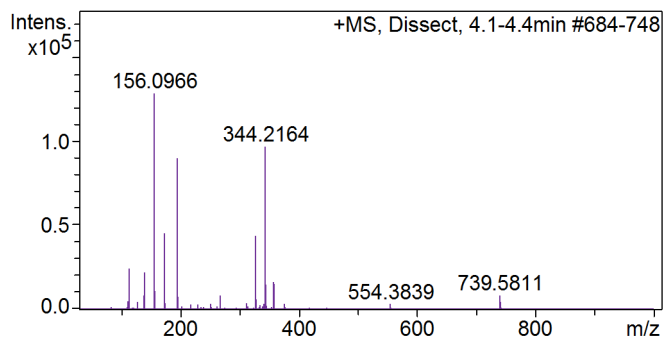

| #  | m/z      | Res.  | S/N   | I      | I %   | FWHM   |
|----|----------|-------|-------|--------|-------|--------|
| 1  | 114.0875 | 22851 | 189.1 | 24350  | 19.0  | 0.0050 |
| 2  | 139.0706 | 24639 | 172.3 | 22185  | 17.3  | 0.0056 |
| 3  | 156.0966 | 27270 | 998.0 | 128483 | 100.0 | 0.0057 |
| 4  | 174.1065 | 27852 | 351.7 | 45272  | 35.2  | 0.0063 |
| 5  | 196.0878 | 29580 | 697.7 | 89816  | 69.9  | 0.0066 |
| 6  | 327.1903 | 34095 | 339.6 | 43720  | 34.0  | 0.0096 |
| 7  | 344.2164 | 33493 | 750.5 | 96621  | 75.2  | 0.0103 |
| 8  | 345.2196 | 31349 | 115.5 | 14865  | 11.6  | 0.0110 |
| 9  | 358.0542 | 33166 | 128.3 | 16512  | 12.9  | 0.0108 |
| 10 | 359.3034 | 34638 | 120.7 | 15534  | 12.1  | 0.0104 |

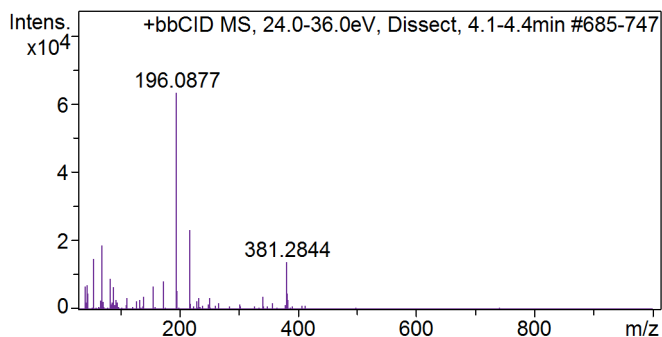

| #  | m/z      | Res.  | S/N   | I     | I %   | FWHM   |
|----|----------|-------|-------|-------|-------|--------|
| 1  | 41.0368  | 14948 | 107.2 | 6788  | 10.7  | 0.0027 |
| 2  | 44.0112  | 15419 | 112.7 | 7133  | 11.3  | 0.0029 |
| 3  | 55.0520  | 17093 | 235.3 | 14902 | 23.5  | 0.0032 |
| 4  | 69.0673  | 18015 | 295.3 | 18697 | 29.5  | 0.0038 |
| 5  | 83.0827  | 19018 | 141.7 | 8970  | 14.2  | 0.0044 |
| 6  | 156.0965 | 26696 | 108.1 | 6847  | 10.8  | 0.0058 |
| 7  | 174.1217 | 27559 | 130.6 | 8269  | 13.1  | 0.0063 |
| 8  | 196.0877 | 29323 | 999.4 | 63280 | 100.0 | 0.0067 |
| 9  | 218.0689 | 29342 | 368.0 | 23303 | 36.8  | 0.0074 |
| 10 | 381.2844 | 33427 | 219.8 | 13920 | 22.0  | 0.0114 |

# Compound Spectrum List Report

## Cmpd 28, Dissect, 4.3 min

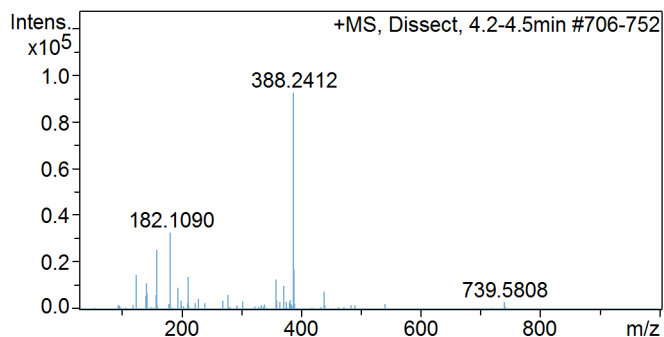

| #  | m/z      | Res.  | S/N   | I     | I %   | FWHM   |
|----|----------|-------|-------|-------|-------|--------|
| 1  | 125.0919 | 24023 | 160.3 | 14823 | 16.0  | 0.0052 |
| 2  | 142.1178 | 24936 | 121.7 | 11259 | 12.2  | 0.0057 |
| 3  | 160.1278 | 26889 | 275.1 | 25446 | 27.5  | 0.0060 |
| 4  | 182.1090 | 27992 | 355.3 | 32861 | 35.5  | 0.0065 |
| 5  | 195.0812 | 28176 | 102.5 | 9481  | 10.3  | 0.0069 |
| 6  | 212.1122 | 17952 | 150.7 | 13940 | 15.1  | 0.0118 |
| 7  | 359.3037 | 34356 | 139.3 | 12882 | 13.9  | 0.0105 |
| 8  | 371.2152 | 30912 | 109.6 | 10138 | 11.0  | 0.0120 |
| 9  | 388.2412 | 34408 | 999.9 | 92484 | 100.0 | 0.0113 |
| 10 | 389.2446 | 32008 | 187.9 | 17377 | 18.8  | 0.0122 |

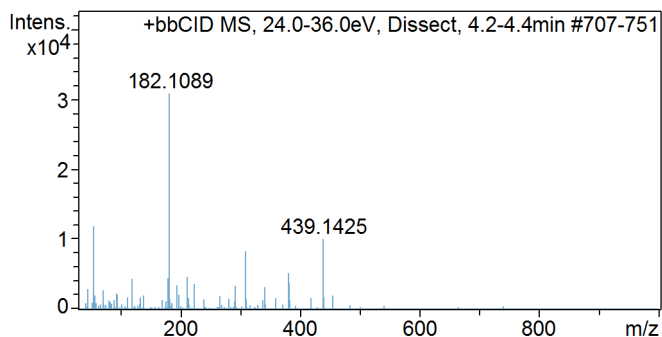

| #  | m/z      | Res.  | S/N   | I     | I %   | FWHM   |
|----|----------|-------|-------|-------|-------|--------|
| 1  | 55.0520  | 17053 | 384.8 | 11903 | 38.5  | 0.0032 |
| 2  | 119.0565 | 22670 | 143.4 | 4435  | 14.3  | 0.0053 |
| 3  | 180.0936 | 26745 | 147.0 | 4547  | 14.7  | 0.0067 |
| 4  | 182.1089 | 28604 | 999.3 | 30912 | 100.0 | 0.0064 |
| 5  | 212.1143 | 16265 | 153.1 | 4736  | 15.3  | 0.0130 |
| 6  | 224.1182 | 28416 | 119.4 | 3694  | 11.9  | 0.0079 |
| 7  | 310.1443 | 31669 | 268.9 | 8318  | 26.9  | 0.0098 |
| 8  | 381.2845 | 33583 | 168.2 | 5203  | 16.8  | 0.0114 |
| 9  | 382.2877 | 34554 | 124.0 | 3837  | 12.4  | 0.0111 |
| 10 | 439.1425 | 32062 | 325.0 | 10055 | 32.5  | 0.0137 |

## Cmpd 29, Dissect, 4.3 min

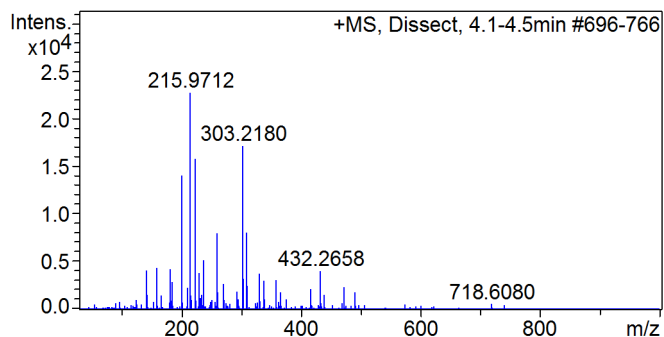

| #  | m/z      | Res.  | S/N   | I     | I %   | FWHM   |
|----|----------|-------|-------|-------|-------|--------|
| 1  | 142.1178 | 25444 | 181.3 | 4119  | 18.1  | 0.0056 |
| 2  | 160.1278 | 26881 | 191.9 | 4359  | 19.2  | 0.0060 |
| 3  | 182.1090 | 27568 | 188.5 | 4283  | 18.9  | 0.0066 |
| 4  | 202.1371 | 28467 | 618.9 | 14059 | 61.9  | 0.0071 |
| 5  | 215.9712 | 29586 | 999.8 | 22712 | 100.0 | 0.0073 |
| 6  | 224.1182 | 29345 | 692.8 | 15738 | 69.3  | 0.0076 |
| 7  | 237.9526 | 29653 | 229.5 | 5213  | 23.0  | 0.0080 |
| 8  | 259.9340 | 31478 | 351.0 | 7972  | 35.1  | 0.0083 |
| 9  | 303.2180 | 31579 | 753.7 | 17121 | 75.4  | 0.0096 |
| 10 | 310.1448 | 30974 | 354.8 | 8059  | 35.5  | 0.0100 |

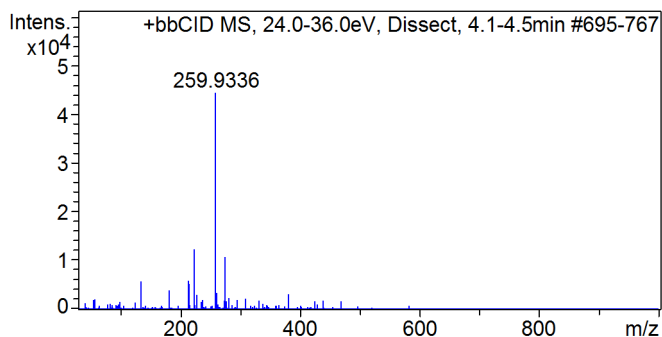

| #  | m/z      | Res.  | S/N   | I     | I %   | FWHM   |
|----|----------|-------|-------|-------|-------|--------|
| 1  | 134.0012 | 25412 | 129.7 | 5766  | 13.0  | 0.0053 |
| 2  | 182.1090 | 28622 | 89.8  | 3993  | 9.0   | 0.0064 |
| 3  | 214.1368 | 29666 | 135.4 | 6018  | 13.6  | 0.0072 |
| 4  | 215.9711 | 30315 | 118.8 | 5283  | 11.9  | 0.0071 |
| 5  | 224.1182 | 27917 | 277.8 | 12350 | 27.8  | 0.0080 |
| 6  | 259.9336 | 32626 | 998.7 | 44396 | 100.0 | 0.0080 |
| 7  | 260.9362 | 26475 | 79.1  | 3516  | 7.9   | 0.0099 |
| 8  | 261.9292 | 29202 | 78.6  | 3493  | 7.9   | 0.0090 |
| 9  | 275.9068 | 31922 | 242.2 | 10766 | 24.2  | 0.0086 |
| 10 | 381.2846 | 34175 | 71.0  | 3154  | 7.1   | 0.0112 |

# Compound Spectrum List Report

## Cmpd 30, Dissect, 4.5 min

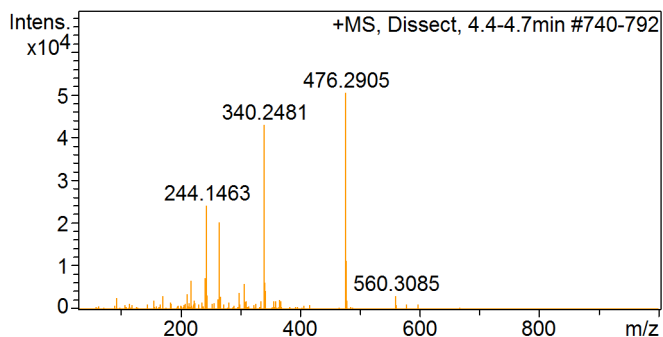

| #  | m/z      | Res.  | S/N   | I     | I %   | FWHM   |
|----|----------|-------|-------|-------|-------|--------|
| 1  | 219.1057 | 28681 | 134.7 | 6799  | 13.5  | 0.0076 |
| 2  | 242.1305 | 30581 | 145.6 | 7349  | 14.6  | 0.0079 |
| 3  | 244.1463 | 30208 | 478.0 | 24131 | 47.9  | 0.0081 |
| 4  | 266.1275 | 30233 | 401.4 | 20266 | 40.2  | 0.0088 |
| 5  | 307.1913 | 28409 | 118.3 | 5971  | 11.8  | 0.0108 |
| 6  | 340.2481 | 33172 | 848.8 | 42848 | 85.0  | 0.0103 |
| 7  | 341.2512 | 30589 | 125.6 | 6341  | 12.6  | 0.0112 |
| 8  | 343.1799 | 28527 | 85.6  | 4322  | 8.6   | 0.0120 |
| 9  | 476.2905 | 32943 | 998.8 | 50424 | 100.0 | 0.0145 |
| 10 | 477.2938 | 31198 | 226.2 | 11422 | 22.7  | 0.0153 |

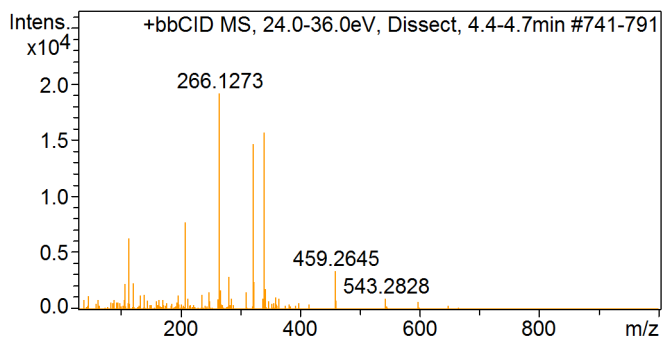

| #  | m/z      | Res.  | S/N   | I     | I %   | FWHM   |
|----|----------|-------|-------|-------|-------|--------|
| 1  | 107.9633 | 21313 | 120.4 | 2311  | 12.1  | 0.0051 |
| 2  | 114.0875 | 22729 | 328.7 | 6310  | 32.9  | 0.0050 |
| 3  | 121.0972 | 22506 | 121.5 | 2332  | 12.2  | 0.0054 |
| 4  | 209.1579 | 29423 | 403.8 | 7752  | 40.4  | 0.0071 |
| 5  | 266.1273 | 30868 | 998.8 | 19176 | 100.0 | 0.0086 |
| 6  | 282.1005 | 30493 | 150.8 | 2895  | 15.1  | 0.0093 |
| 7  | 322.2381 | 32421 | 762.5 | 14640 | 76.3  | 0.0099 |
| 8  | 323.2408 | 31751 | 128.2 | 2462  | 12.8  | 0.0102 |
| 9  | 340.2481 | 31902 | 814.7 | 15642 | 81.6  | 0.0107 |
| 10 | 459.2645 | 30688 | 177.4 | 3406  | 17.8  | 0.0150 |

## Cmpd 31, Dissect, 4.6 min

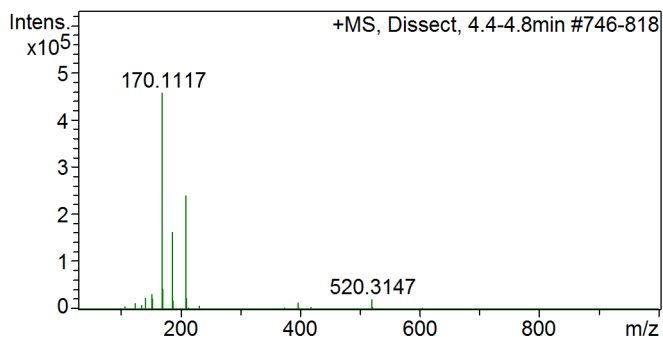

| #  | m/z      | Res.  | S/N   | I      | I %   | FWHM   |
|----|----------|-------|-------|--------|-------|--------|
| 1  | 142.1177 | 25411 | 54.8  | 25149  | 5.5   | 0.0056 |
| 2  | 152.1017 | 26080 | 71.4  | 32810  | 7.2   | 0.0058 |
| 3  | 153.0857 | 26112 | 50.6  | 23240  | 5.1   | 0.0059 |
| 4  | 170.1117 | 29284 | 995.2 | 457069 | 100.0 | 0.0058 |
| 5  | 171.1151 | 26483 | 94.0  | 43182  | 9.4   | 0.0065 |
| 6  | 188.1216 | 29362 | 356.4 | 163698 | 35.8  | 0.0064 |
| 7  | 189.1250 | 26914 | 39.5  | 18151  | 4.0   | 0.0070 |
| 8  | 210.1029 | 30439 | 524.7 | 240983 | 52.7  | 0.0069 |
| 9  | 211.1062 | 28397 | 53.4  | 24510  | 5.4   | 0.0074 |
| 10 | 520.3147 | 32166 | 49.5  | 22721  | 5.0   | 0.0162 |

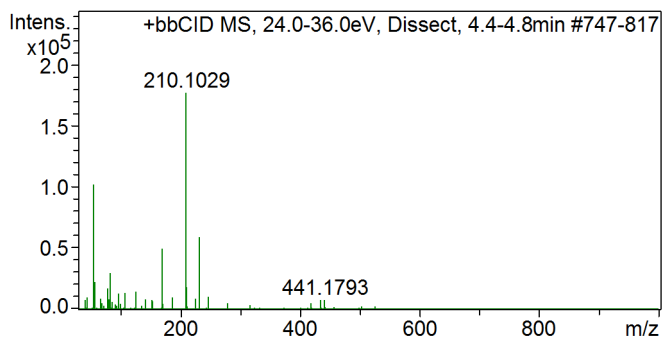

| #  | m/z      | Res.  | S/N   | I      | I %   | FWHM   |
|----|----------|-------|-------|--------|-------|--------|
| 1  | 55.0156  | 16859 | 89.5  | 15845  | 9.0   | 0.0033 |
| 2  | 55.0520  | 17409 | 576.7 | 102062 | 57.7  | 0.0032 |
| 3  | 57.0676  | 17099 | 128.1 | 22675  | 12.8  | 0.0033 |
| 4  | 79.0514  | 19077 | 97.4  | 17242  | 9.7   | 0.0041 |
| 5  | 83.0825  | 19303 | 170.8 | 30217  | 17.1  | 0.0043 |
| 6  | 125.0919 | 23558 | 83.3  | 14747  | 8.3   | 0.0053 |
| 7  | 170.1116 | 28177 | 280.2 | 49594  | 28.0  | 0.0060 |
| 8  | 210.1029 | 29260 | 999.3 | 176845 | 100.0 | 0.0072 |
| 9  | 211.1061 | 28388 | 103.5 | 18319  | 10.4  | 0.0074 |
| 10 | 232.0841 | 30432 | 333.6 | 59034  | 33.4  | 0.0076 |



# Compound Spectrum List Report

## Cmpd 32, Dissect, 4.7 min

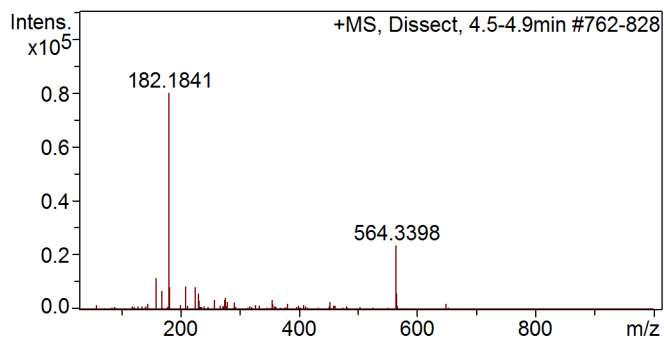

| #  | m/z      | Res.  | S/N   | I     | I %   | FWHM   |
|----|----------|-------|-------|-------|-------|--------|
| 1  | 159.0593 | 25289 | 145.4 | 11650 | 14.5  | 0.0063 |
| 2  | 170.1118 | 28788 | 85.8  | 6871  | 8.6   | 0.0059 |
| 3  | 182.1841 | 28540 | 999.8 | 80112 | 100.0 | 0.0064 |
| 4  | 183.1875 | 27374 | 103.5 | 8297  | 10.4  | 0.0067 |
| 5  | 210.1031 | 29977 | 108.6 | 8704  | 10.9  | 0.0070 |
| 6  | 226.1341 | 30247 | 105.5 | 8451  | 10.5  | 0.0075 |
| 7  | 231.9480 | 29067 | 73.8  | 5912  | 7.4   | 0.0080 |
| 8  | 277.0591 | 29542 | 55.8  | 4474  | 5.6   | 0.0094 |
| 9  | 564.3398 | 30861 | 296.2 | 23732 | 29.6  | 0.0183 |
| 10 | 565.3421 | 31899 | 74.4  | 5963  | 7.4   | 0.0177 |

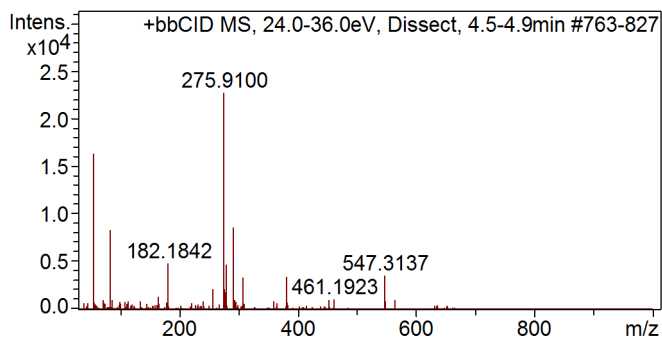

| #  | m/z      | Res.  | S/N   | I     | I %   | FWHM   |
|----|----------|-------|-------|-------|-------|--------|
| 1  | 55.0519  | 17296 | 716.3 | 16289 | 71.7  | 0.0032 |
| 2  | 83.0826  | 19153 | 367.0 | 8347  | 36.8  | 0.0043 |
| 3  | 182.1842 | 27173 | 213.5 | 4856  | 21.4  | 0.0067 |
| 4  | 257.1271 | 28646 | 95.2  | 2164  | 9.5   | 0.0090 |
| 5  | 275.9100 | 31265 | 998.5 | 22708 | 100.0 | 0.0088 |
| 6  | 280.1423 | 29473 | 208.0 | 4731  | 20.8  | 0.0095 |
| 7  | 291.8836 | 30095 | 378.0 | 8596  | 37.9  | 0.0097 |
| 8  | 307.8570 | 31593 | 147.9 | 3364  | 14.8  | 0.0097 |
| 9  | 381.2843 | 31845 | 151.9 | 3454  | 15.2  | 0.0120 |
| 10 | 547.3137 | 34613 | 157.1 | 3573  | 15.7  | 0.0158 |

## Cmpd 33, Dissect, 4.7 min

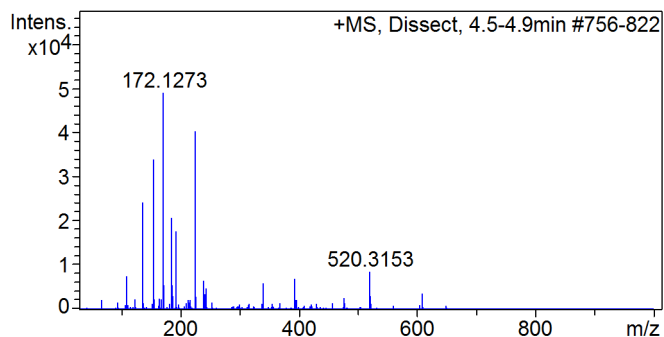

| #  | m/z      | Res.  | S/N   | I     | I %   | FWHM   |
|----|----------|-------|-------|-------|-------|--------|
| 1  | 109.0975 | 21768 | 153.3 | 7510  | 15.3  | 0.0050 |
| 2  | 136.0710 | 25036 | 493.0 | 24151 | 49.3  | 0.0054 |
| 3  | 155.1012 | 26333 | 691.4 | 33874 | 69.2  | 0.0059 |
| 4  | 172.1273 | 27616 | 999.8 | 48983 | 100.0 | 0.0062 |
| 5  | 186.2153 | 27993 | 422.3 | 20690 | 42.2  | 0.0067 |
| 6  | 194.1086 | 28239 | 360.0 | 17638 | 36.0  | 0.0069 |
| 7  | 226.1340 | 30457 | 820.2 | 40181 | 82.0  | 0.0074 |
| 8  | 240.1415 | 27543 | 133.0 | 6518  | 13.3  | 0.0087 |
| 9  | 393.2514 | 32198 | 142.7 | 6989  | 14.3  | 0.0122 |
| 10 | 520.3153 | 33170 | 174.0 | 8526  | 17.4  | 0.0157 |

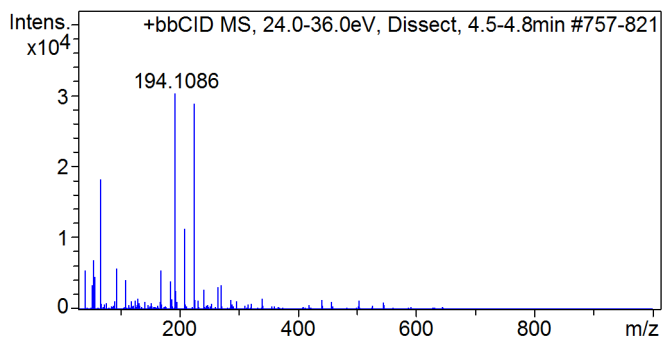

| #  | m/z      | Res.  | S/N   | I     | I %   | FWHM   |
|----|----------|-------|-------|-------|-------|--------|
| 1  | 41.0368  | 14942 | 182.1 | 5528  | 18.2  | 0.0027 |
| 2  | 55.0520  | 17067 | 228.7 | 6945  | 22.9  | 0.0032 |
| 3  | 57.0676  | 17209 | 151.2 | 4592  | 15.1  | 0.0033 |
| 4  | 67.0518  | 17503 | 599.1 | 18191 | 60.0  | 0.0038 |
| 5  | 94.0621  | 19317 | 190.9 | 5796  | 19.1  | 0.0049 |
| 6  | 170.1117 | 28075 | 180.8 | 5489  | 18.1  | 0.0061 |
| 7  | 194.1086 | 28978 | 998.9 | 30332 | 100.0 | 0.0067 |
| 8  | 210.0819 | 28556 | 201.5 | 6118  | 20.2  | 0.0074 |
| 9  | 210.1031 | 28606 | 371.6 | 11284 | 37.2  | 0.0073 |
| 10 | 226.1336 | 30677 | 948.4 | 28796 | 94.9  | 0.0074 |

# Compound Spectrum List Report

## Cmpd 34, Dissect, 4.8 min

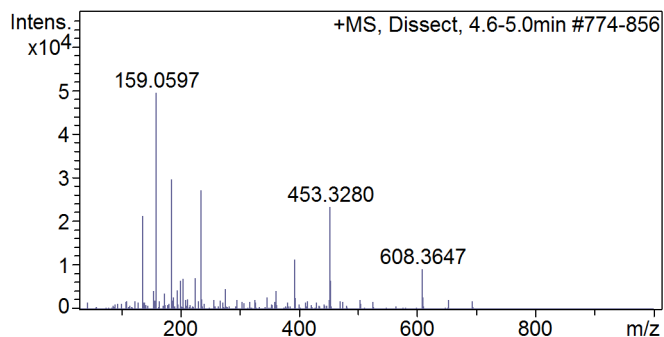

| #  | m/z      | Res.  | S/N   | I     | I %   | FWHM   |
|----|----------|-------|-------|-------|-------|--------|
| 1  | 136.0711 | 25068 | 430.6 | 21289 | 43.1  | 0.0054 |
| 2  | 159.0597 | 26687 | 999.9 | 49435 | 100.0 | 0.0060 |
| 3  | 186.2153 | 28170 | 598.4 | 29584 | 59.8  | 0.0066 |
| 4  | 205.1003 | 28154 | 141.6 | 6999  | 14.2  | 0.0073 |
| 5  | 226.1342 | 30143 | 145.8 | 7210  | 14.6  | 0.0075 |
| 6  | 236.1051 | 29852 | 549.5 | 27166 | 55.0  | 0.0079 |
| 7  | 393.2516 | 32284 | 230.5 | 11396 | 23.1  | 0.0122 |
| 8  | 453.3280 | 30611 | 472.8 | 23374 | 47.3  | 0.0148 |
| 9  | 454.3310 | 31216 | 133.9 | 6620  | 13.4  | 0.0146 |
| 10 | 608.3647 | 30200 | 187.9 | 9289  | 18.8  | 0.0201 |

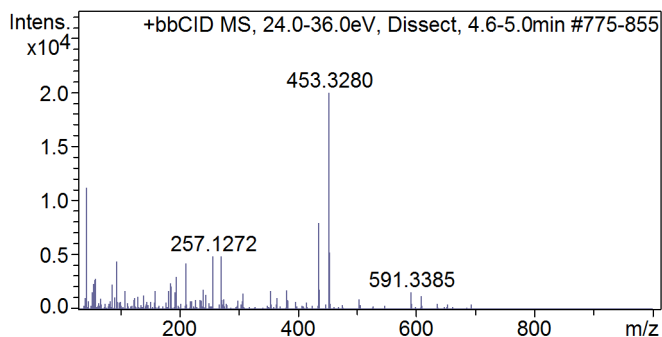

| #  | m/z      | Res.  | S/N   | I     | I %   | FWHM   |
|----|----------|-------|-------|-------|-------|--------|
| 1  | 43.0160  | 15539 | 562.2 | 11212 | 56.2  | 0.0028 |
| 2  | 59.0469  | 17053 | 143.0 | 2852  | 14.3  | 0.0035 |
| 3  | 94.0621  | 19472 | 222.6 | 4440  | 22.3  | 0.0048 |
| 4  | 196.1242 | 26942 | 152.2 | 3035  | 15.2  | 0.0073 |
| 5  | 212.1111 | 27200 | 212.6 | 4240  | 21.3  | 0.0078 |
| 6  | 257.1272 | 30126 | 247.2 | 4930  | 24.7  | 0.0085 |
| 7  | 271.1713 | 30484 | 246.7 | 4920  | 24.7  | 0.0089 |
| 8  | 435.3180 | 29441 | 399.5 | 7967  | 40.0  | 0.0148 |
| 9  | 453.3280 | 32826 | 999.9 | 19940 | 100.0 | 0.0138 |
| 10 | 454.3315 | 29908 | 264.8 | 5280  | 26.5  | 0.0152 |

## Cmpd 35, Dissect, 4.9 min

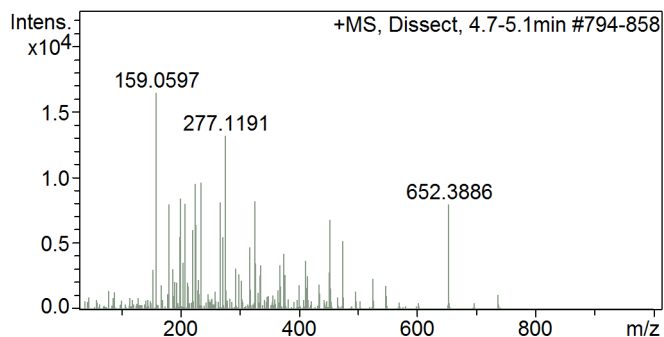

| #  | m/z      | Res.  | S/N   | I     | I %   | FWHM   |
|----|----------|-------|-------|-------|-------|--------|
| 1  | 159.0597 | 26330 | 999.9 | 16452 | 100.0 | 0.0060 |
| 2  | 182.1115 | 28255 | 484.6 | 7974  | 48.5  | 0.0064 |
| 3  | 201.0956 | 28065 | 510.9 | 8405  | 51.1  | 0.0072 |
| 4  | 209.1100 | 27942 | 488.8 | 8043  | 48.9  | 0.0075 |
| 5  | 226.1359 | 29779 | 578.3 | 9514  | 57.8  | 0.0076 |
| 6  | 236.1051 | 29285 | 584.5 | 9616  | 58.5  | 0.0081 |
| 7  | 268.1432 | 29637 | 493.3 | 8116  | 49.3  | 0.0090 |
| 8  | 277.1191 | 31260 | 801.1 | 13181 | 80.1  | 0.0089 |
| 9  | 326.6991 | 34063 | 500.7 | 8238  | 50.1  | 0.0096 |
| 10 | 652.3886 | 31360 | 485.2 | 7982  | 48.5  | 0.0208 |

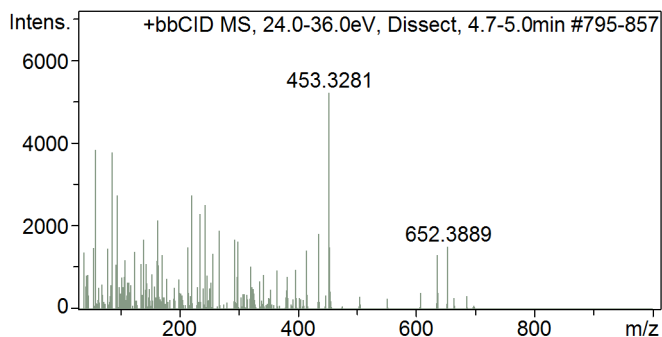

| #  | m/z      | Res.  | S/N    | I    | I %   | FWHM   |
|----|----------|-------|--------|------|-------|--------|
| 1  | 58.0628  | 17179 | 736.4  | 3839 | 73.6  | 0.0034 |
| 2  | 87.0411  | 19554 | 725.0  | 3779 | 72.5  | 0.0045 |
| 3  | 95.0824  | 19713 | 525.4  | 2738 | 52.5  | 0.0048 |
| 4  | 164.9149 | 26250 | 412.2  | 2149 | 41.2  | 0.0063 |
| 5  | 222.1027 | 27637 | 524.7  | 2735 | 52.5  | 0.0080 |
| 6  | 236.1174 | 27555 | 440.4  | 2296 | 44.0  | 0.0086 |
| 7  | 244.0838 | 28763 | 480.6  | 2505 | 48.1  | 0.0085 |
| 8  | 268.1427 | 27430 | 362.8  | 1891 | 36.3  | 0.0098 |
| 9  | 435.3180 | 28529 | 350.3  | 1826 | 35.0  | 0.0153 |
| 10 | 453.3281 | 32339 | 1000.0 | 5212 | 100.0 | 0.0140 |

# Compound Spectrum List Report

## Cmpd 36, Dissect, 5.0 min

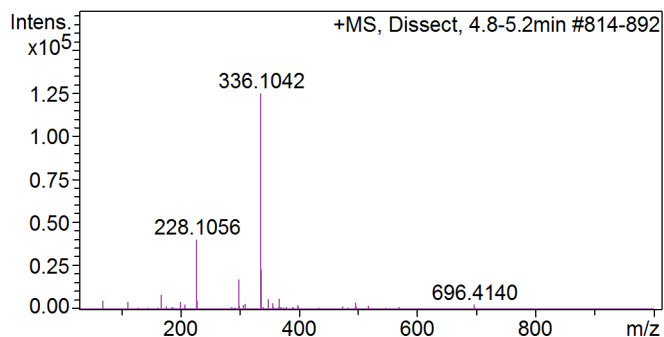

| #  | m/z      | Res.  | S/N   | I      | I %   | FWHM   |
|----|----------|-------|-------|--------|-------|--------|
| 1  | 69.0673  | 17911 | 40.9  | 5116   | 4.1   | 0.0039 |
| 2  | 111.1132 | 21598 | 35.0  | 4375   | 3.5   | 0.0051 |
| 3  | 169.1157 | 24959 | 68.0  | 8500   | 6.8   | 0.0068 |
| 4  | 228.1056 | 30528 | 323.5 | 40432  | 32.4  | 0.0075 |
| 5  | 229.1089 | 27671 | 39.6  | 4953   | 4.0   | 0.0083 |
| 6  | 299.0784 | 32727 | 140.9 | 17614  | 14.1  | 0.0091 |
| 7  | 336.1042 | 32952 | 999.3 | 124906 | 100.0 | 0.0102 |
| 8  | 337.1075 | 30952 | 184.7 | 23084  | 18.5  | 0.0109 |
| 9  | 348.7111 | 33943 | 49.3  | 6161   | 4.9   | 0.0103 |
| 10 | 368.0752 | 30990 | 51.2  | 6405   | 5.1   | 0.0119 |

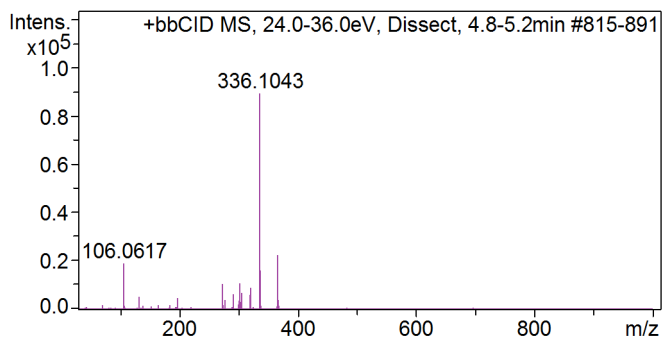

| #  | m/z      | Res.  | S/N   | I     | I %   | FWHM   |
|----|----------|-------|-------|-------|-------|--------|
| 1  | 106.0617 | 21922 | 212.5 | 19020 | 21.3  | 0.0048 |
| 2  | 274.0696 | 30956 | 119.2 | 10673 | 11.9  | 0.0089 |
| 3  | 292.0795 | 29214 | 72.1  | 6450  | 7.2   | 0.0100 |
| 4  | 303.0713 | 30861 | 121.7 | 10895 | 12.2  | 0.0098 |
| 5  | 306.0583 | 29678 | 78.9  | 7060  | 7.9   | 0.0103 |
| 6  | 320.0737 | 30627 | 70.6  | 6318  | 7.1   | 0.0105 |
| 7  | 321.0810 | 30108 | 102.1 | 9136  | 10.2  | 0.0107 |
| 8  | 336.1043 | 34644 | 999.3 | 89438 | 100.0 | 0.0097 |
| 9  | 337.1081 | 28300 | 180.4 | 16146 | 18.1  | 0.0119 |
| 10 | 366.0596 | 32618 | 252.1 | 22562 | 25.2  | 0.0112 |

## Cmpd 37, Dissect, 5.1 min

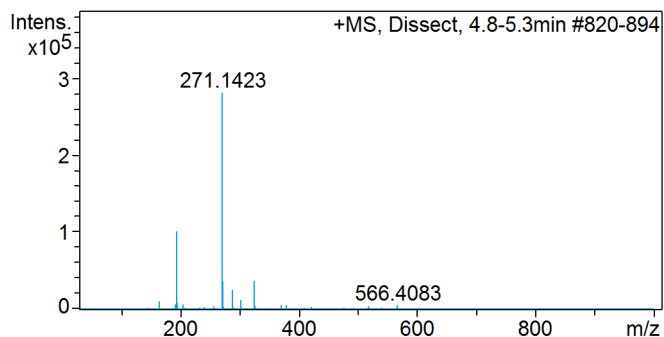

| #  | m/z      | Res.  | S/N   | I      | I %   | FWHM   |
|----|----------|-------|-------|--------|-------|--------|
| 1  | 165.0830 | 25740 | 36.9  | 10375  | 3.7   | 0.0064 |
| 2  | 192.0703 | 28095 | 22.3  | 6270   | 2.2   | 0.0068 |
| 3  | 195.0924 | 29444 | 360.7 | 101523 | 36.1  | 0.0066 |
| 4  | 196.0950 | 23294 | 28.8  | 8114   | 2.9   | 0.0084 |
| 5  | 205.1155 | 28261 | 21.8  | 6127   | 2.2   | 0.0073 |
| 6  | 271.1423 | 32922 | 998.3 | 281006 | 100.0 | 0.0082 |
| 7  | 272.1451 | 29132 | 132.2 | 37204  | 13.2  | 0.0093 |
| 8  | 289.1530 | 35803 | 92.6  | 26078  | 9.3   | 0.0081 |
| 9  | 303.1677 | 32009 | 44.4  | 12507  | 4.5   | 0.0095 |
| 10 | 325.1489 | 32479 | 132.5 | 37291  | 13.3  | 0.0100 |

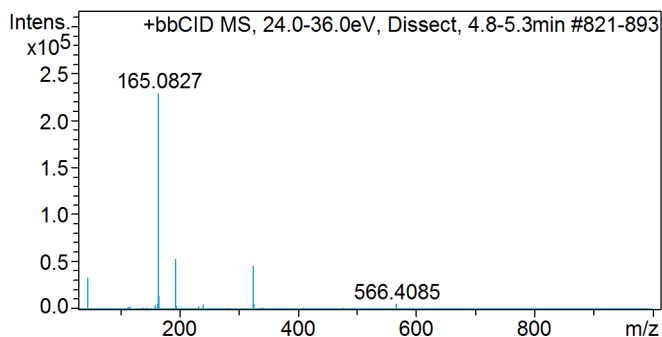

| #  | m/z      | Res.  | S/N   | I      | I %   | FWHM   |
|----|----------|-------|-------|--------|-------|--------|
| 1  | 45.0315  | 15766 | 148.8 | 34111  | 14.9  | 0.0029 |
| 2  | 160.0450 | 26716 | 18.6  | 4264   | 1.9   | 0.0060 |
| 3  | 164.9148 | 26111 | 21.0  | 4827   | 2.1   | 0.0063 |
| 4  | 165.0827 | 28278 | 997.7 | 228787 | 100.0 | 0.0058 |
| 5  | 166.0856 | 21378 | 63.7  | 14612  | 6.4   | 0.0078 |
| 6  | 195.0923 | 29418 | 234.4 | 53762  | 23.5  | 0.0066 |
| 7  | 241.1327 | 29643 | 22.8  | 5228   | 2.3   | 0.0081 |
| 8  | 325.1487 | 32920 | 201.3 | 46169  | 20.2  | 0.0099 |
| 9  | 326.1511 | 28178 | 25.2  | 5778   | 2.5   | 0.0116 |
| 10 | 566.4085 | 29689 | 25.9  | 5947   | 2.6   | 0.0191 |

# Compound Spectrum List Report

## Cmpd 38, Dissect, 5.2 min

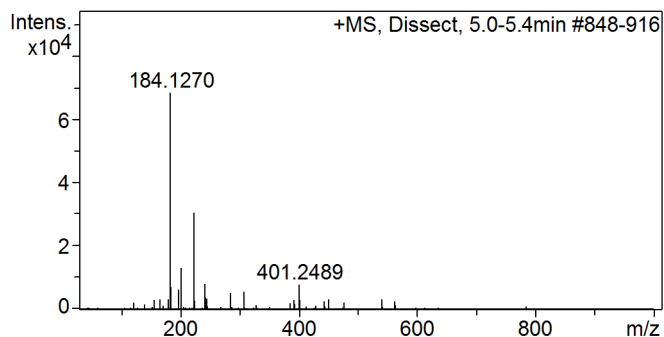

| #  | m/z      | Res.  | S/N   | I     | I %   | FWHM   |
|----|----------|-------|-------|-------|-------|--------|
| 1  | 184.1270 | 28342 | 999.3 | 68374 | 100.0 | 0.0065 |
| 2  | 185.1303 | 26297 | 105.3 | 7205  | 10.5  | 0.0070 |
| 3  | 198.1422 | 28603 | 91.4  | 6255  | 9.1   | 0.0069 |
| 4  | 202.1371 | 28703 | 192.1 | 13145 | 19.2  | 0.0070 |
| 5  | 224.1184 | 29438 | 445.2 | 30460 | 44.5  | 0.0076 |
| 6  | 242.1458 | 29095 | 120.2 | 8222  | 12.0  | 0.0083 |
| 7  | 242.2761 | 29745 | 78.4  | 5365  | 7.8   | 0.0081 |
| 8  | 285.1213 | 30066 | 76.7  | 5249  | 7.7   | 0.0095 |
| 9  | 308.2116 | 30095 | 83.3  | 5697  | 8.3   | 0.0102 |
| 10 | 401.2489 | 35760 | 116.3 | 7959  | 11.6  | 0.0112 |

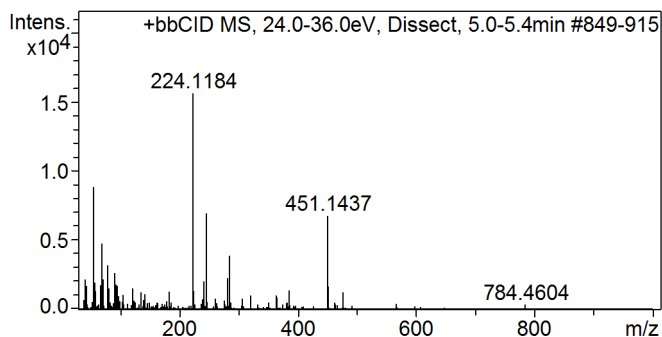

| #  | m/z      | Res.  | S/N   | I     | I %   | FWHM   |
|----|----------|-------|-------|-------|-------|--------|
| 1  | 55.0520  | 17127 | 566.0 | 8844  | 56.6  | 0.0032 |
| 2  | 69.0673  | 17752 | 307.1 | 4798  | 30.7  | 0.0039 |
| 3  | 71.0466  | 18363 | 139.1 | 2174  | 13.9  | 0.0039 |
| 4  | 79.0513  | 18728 | 205.6 | 3213  | 20.6  | 0.0042 |
| 5  | 91.0513  | 19961 | 169.3 | 2646  | 16.9  | 0.0046 |
| 6  | 224.1184 | 29090 | 999.9 | 15623 | 100.0 | 0.0077 |
| 7  | 246.0995 | 29213 | 445.8 | 6966  | 44.6  | 0.0084 |
| 8  | 282.1585 | 29486 | 146.8 | 2294  | 14.7  | 0.0096 |
| 9  | 285.1213 | 29807 | 248.2 | 3878  | 24.8  | 0.0096 |
| 10 | 451.1437 | 30876 | 431.8 | 6746  | 43.2  | 0.0146 |

## Cmpd 39, Dissect, 5.2 min

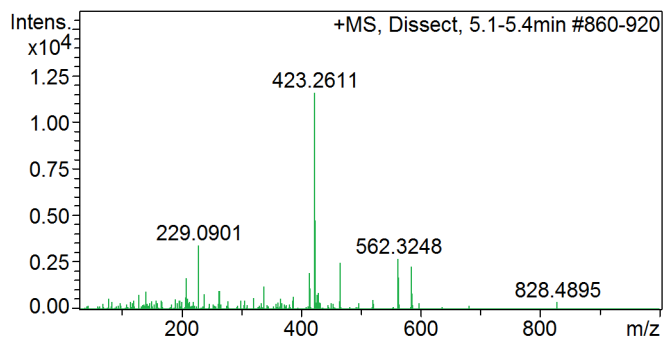

| #  | m/z      | Res.  | S/N   | I     | I %   | FWHM   |
|----|----------|-------|-------|-------|-------|--------|
| 1  | 229.0901 | 25961 | 296.3 | 3430  | 29.6  | 0.0088 |
| 2  | 414.7483 | 33794 | 170.6 | 1974  | 17.1  | 0.0123 |
| 3  | 423.2611 | 34957 | 999.5 | 11569 | 100.0 | 0.0121 |
| 4  | 423.7625 | 33067 | 410.4 | 4750  | 41.1  | 0.0128 |
| 5  | 424.2606 | 24885 | 210.6 | 2437  | 21.1  | 0.0170 |
| 6  | 465.2701 | 35570 | 216.6 | 2507  | 21.7  | 0.0131 |
| 7  | 562.3248 | 32762 | 235.7 | 2728  | 23.6  | 0.0172 |
| 8  | 562.8269 | 33205 | 148.4 | 1717  | 14.8  | 0.0169 |
| 9  | 584.3368 | 31961 | 197.9 | 2290  | 19.8  | 0.0183 |
| 10 | 584.8394 | 36675 | 183.3 | 2121  | 18.3  | 0.0159 |

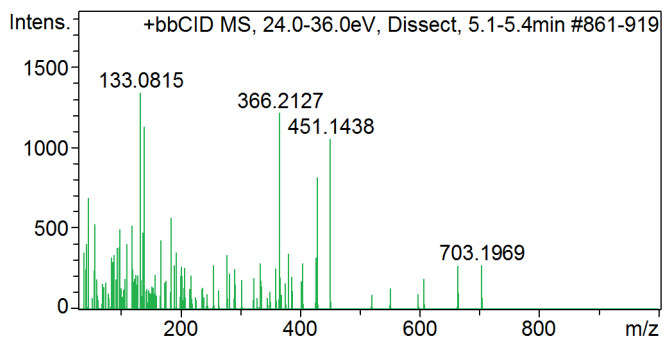

| #  | m/z      | Res.  | S/N   | I    | I %   | FWHM   |
|----|----------|-------|-------|------|-------|--------|
| 1  | 46.9930  | 16050 | 512.9 | 687  | 51.3  | 0.0029 |
| 2  | 57.0677  | 17111 | 394.2 | 528  | 39.5  | 0.0033 |
| 3  | 99.0408  | 20079 | 370.6 | 497  | 37.1  | 0.0049 |
| 4  | 119.0564 | 22726 | 387.3 | 519  | 38.8  | 0.0052 |
| 5  | 133.0815 | 24107 | 999.3 | 1339 | 100.0 | 0.0055 |
| 6  | 139.9100 | 25694 | 841.1 | 1127 | 84.2  | 0.0054 |
| 7  | 185.0746 | 26808 | 422.6 | 566  | 42.3  | 0.0069 |
| 8  | 366.2127 | 30975 | 907.2 | 1215 | 90.8  | 0.0118 |
| 9  | 429.2718 | 31462 | 609.8 | 817  | 61.0  | 0.0136 |
| 10 | 451.1438 | 30147 | 784.4 | 1051 | 78.5  | 0.0150 |

# Compound Spectrum List Report

## Cmpd 40, Dissect, 5.4 min

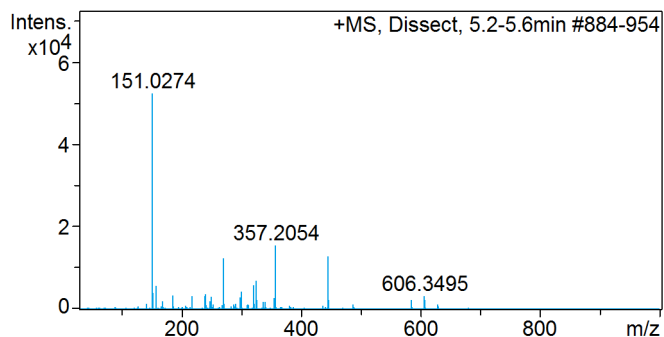

| #  | m/z      | Res.  | S/N   | I     | I %   | FWHM   |
|----|----------|-------|-------|-------|-------|--------|
| 1  | 151.0274 | 26026 | 999.9 | 52446 | 100.0 | 0.0058 |
| 2  | 152.0304 | 24272 | 79.2  | 4154  | 7.9   | 0.0063 |
| 3  | 158.0911 | 25850 | 110.9 | 5818  | 11.1  | 0.0061 |
| 4  | 271.1423 | 29418 | 236.3 | 12394 | 23.6  | 0.0092 |
| 5  | 301.1520 | 28887 | 85.0  | 4456  | 8.5   | 0.0104 |
| 6  | 321.1205 | 33328 | 113.9 | 5973  | 11.4  | 0.0096 |
| 7  | 325.2167 | 29592 | 133.3 | 6993  | 13.3  | 0.0110 |
| 8  | 357.2054 | 32673 | 297.1 | 15583 | 29.7  | 0.0109 |
| 9  | 445.2741 | 35870 | 244.9 | 12844 | 24.5  | 0.0124 |
| 10 | 445.7760 | 34258 | 101.9 | 5344  | 10.2  | 0.0130 |

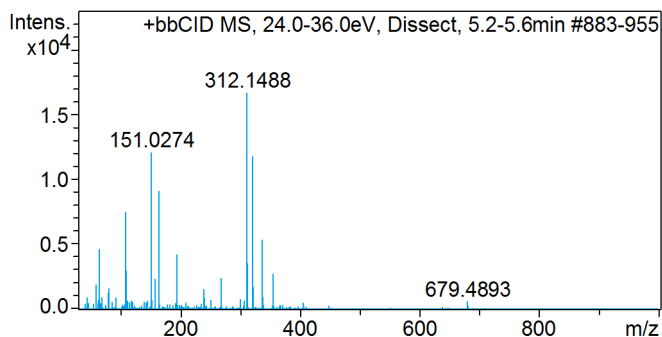

| #  | m/z      | Res.  | S/N   | I     | I %   | FWHM   |
|----|----------|-------|-------|-------|-------|--------|
| 1  | 65.0362  | 17252 | 277.0 | 4624  | 27.7  | 0.0038 |
| 2  | 109.0070 | 21699 | 447.9 | 7476  | 44.8  | 0.0050 |
| 3  | 151.0274 | 25716 | 722.5 | 12059 | 72.3  | 0.0059 |
| 4  | 164.9148 | 26461 | 281.4 | 4698  | 28.2  | 0.0062 |
| 5  | 165.0831 | 25461 | 546.5 | 9122  | 54.7  | 0.0065 |
| 6  | 195.0908 | 22264 | 253.8 | 4236  | 25.4  | 0.0088 |
| 7  | 312.1488 | 31785 | 998.9 | 16673 | 100.0 | 0.0098 |
| 8  | 313.1523 | 29452 | 214.6 | 3581  | 21.5  | 0.0106 |
| 9  | 321.1201 | 31436 | 706.0 | 11784 | 70.7  | 0.0102 |
| 10 | 337.0935 | 30077 | 323.7 | 5404  | 32.4  | 0.0112 |

## Cmpd 41, Dissect, 5.4 min

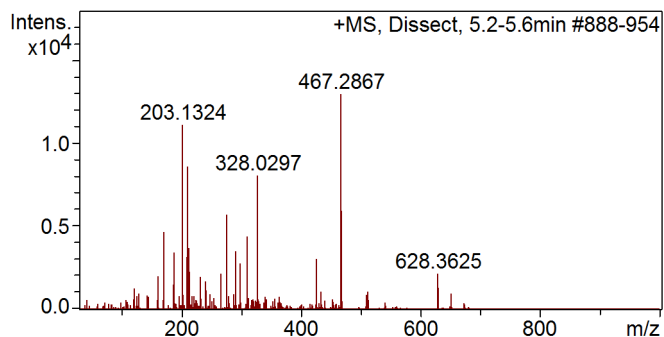

| #  | m/z      | Res.  | S/N   | I     | I %   | FWHM   |
|----|----------|-------|-------|-------|-------|--------|
| 1  | 171.0959 | 26346 | 358.6 | 4653  | 35.9  | 0.0065 |
| 2  | 203.1324 | 28141 | 852.7 | 11063 | 85.3  | 0.0072 |
| 3  | 211.0872 | 27943 | 661.7 | 8585  | 66.2  | 0.0076 |
| 4  | 213.1047 | 26955 | 284.5 | 3691  | 28.5  | 0.0079 |
| 5  | 276.1868 | 30003 | 440.5 | 5715  | 44.1  | 0.0092 |
| 6  | 291.1343 | 32516 | 270.1 | 3505  | 27.0  | 0.0090 |
| 7  | 311.0036 | 31671 | 337.8 | 4382  | 33.8  | 0.0098 |
| 8  | 328.0297 | 30819 | 620.2 | 8047  | 62.0  | 0.0106 |
| 9  | 467.2867 | 33502 | 999.9 | 12974 | 100.0 | 0.0139 |
| 10 | 467.7883 | 32448 | 456.8 | 5926  | 45.7  | 0.0144 |

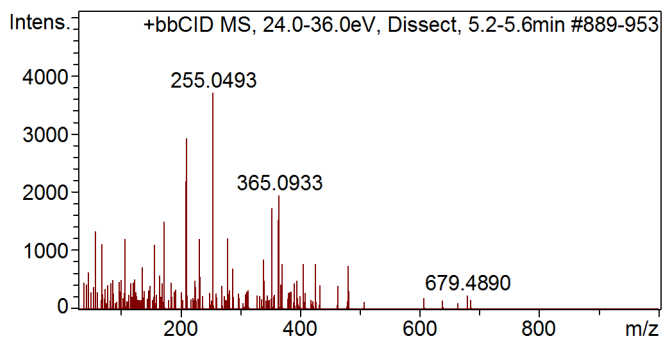

| #  | m/z      | Res.  | S/N   | I    | I %   | FWHM   |
|----|----------|-------|-------|------|-------|--------|
| 1  | 58.0628  | 17336 | 360.6 | 1336 | 36.1  | 0.0033 |
| 2  | 174.1221 | 26078 | 403.9 | 1497 | 40.4  | 0.0067 |
| 3  | 210.1398 | 27600 | 591.5 | 2192 | 59.2  | 0.0076 |
| 4  | 211.0873 | 28361 | 787.0 | 2916 | 78.7  | 0.0074 |
| 5  | 211.1204 | 26177 | 396.1 | 1468 | 39.6  | 0.0081 |
| 6  | 255.0493 | 28729 | 999.7 | 3704 | 100.0 | 0.0089 |
| 7  | 280.1422 | 27952 | 329.8 | 1222 | 33.0  | 0.0100 |
| 8  | 353.1422 | 27957 | 468.3 | 1735 | 46.8  | 0.0126 |
| 9  | 364.1974 | 29605 | 415.4 | 1539 | 41.6  | 0.0123 |
| 10 | 365.0933 | 31848 | 524.7 | 1944 | 52.5  | 0.0115 |

# Compound Spectrum List Report

## Cmpd 42, Dissect, 5.5 min

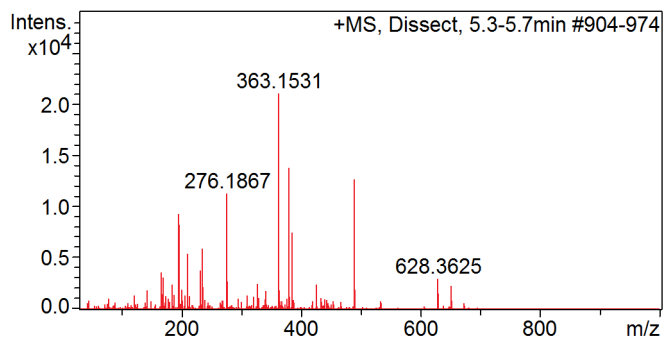

| #  | m/z      | Res.  | S/N   | I     | I %   | FWHM   |
|----|----------|-------|-------|-------|-------|--------|
| 1  | 196.1266 | 27860 | 442.1 | 9315  | 44.2  | 0.0070 |
| 2  | 197.0566 | 28251 | 390.0 | 8218  | 39.0  | 0.0070 |
| 3  | 211.0871 | 26610 | 257.7 | 5431  | 25.8  | 0.0079 |
| 4  | 236.1177 | 27490 | 282.1 | 5944  | 28.2  | 0.0086 |
| 5  | 276.1867 | 31539 | 535.5 | 11284 | 53.6  | 0.0088 |
| 6  | 363.1531 | 32361 | 999.8 | 21067 | 100.0 | 0.0112 |
| 7  | 380.1786 | 31029 | 655.0 | 13802 | 65.5  | 0.0123 |
| 8  | 385.1340 | 32706 | 356.5 | 7512  | 35.7  | 0.0118 |
| 9  | 489.2984 | 34549 | 601.9 | 12682 | 60.2  | 0.0142 |
| 10 | 489.7997 | 31195 | 275.1 | 5796  | 27.5  | 0.0157 |

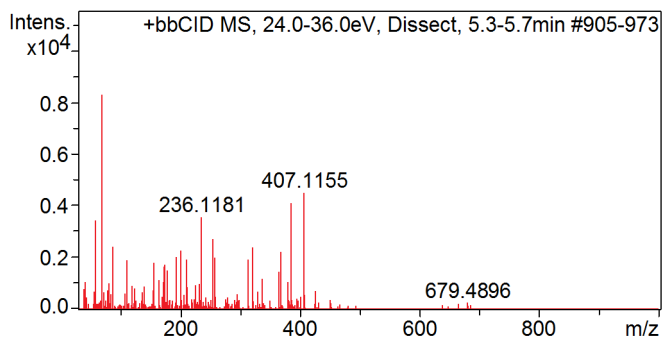

| #  | m/z      | Res.  | S/N   | I    | I %   | FWHM   |
|----|----------|-------|-------|------|-------|--------|
| 1  | 58.0628  | 17263 | 412.5 | 3432 | 41.3  | 0.0034 |
| 2  | 69.0309  | 17927 | 999.2 | 8313 | 100.0 | 0.0039 |
| 3  | 69.0673  | 17771 | 538.4 | 4480 | 53.9  | 0.0039 |
| 4  | 87.0411  | 18604 | 291.7 | 2427 | 29.2  | 0.0047 |
| 5  | 202.0367 | 28013 | 275.6 | 2293 | 27.6  | 0.0072 |
| 6  | 236.1181 | 28470 | 427.5 | 3557 | 42.8  | 0.0083 |
| 7  | 255.0495 | 26924 | 328.2 | 2730 | 32.8  | 0.0095 |
| 8  | 321.1207 | 31113 | 289.8 | 2412 | 29.0  | 0.0103 |
| 9  | 385.1341 | 31394 | 494.0 | 4110 | 49.4  | 0.0123 |
| 10 | 407.1155 | 30088 | 542.0 | 4509 | 54.2  | 0.0135 |

## Cmpd 43, Dissect, 5.6 min

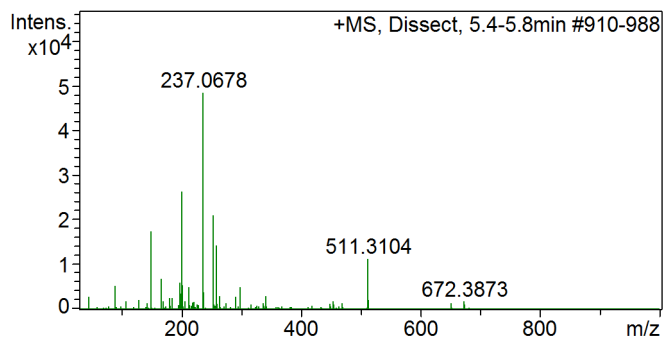

| #  | m/z      | Res.  | S/N   | I     | I %   | FWHM   |
|----|----------|-------|-------|-------|-------|--------|
| 1  | 89.0567  | 19251 | 111.9 | 5423  | 11.2  | 0.0046 |
| 2  | 149.0183 | 25895 | 361.9 | 17529 | 36.2  | 0.0058 |
| 3  | 167.1010 | 26754 | 141.4 | 6850  | 14.2  | 0.0062 |
| 4  | 198.1422 | 28688 | 125.5 | 6077  | 12.6  | 0.0069 |
| 5  | 202.0364 | 29146 | 543.9 | 26347 | 54.5  | 0.0069 |
| 6  | 202.1369 | 28879 | 114.9 | 5564  | 11.5  | 0.0070 |
| 7  | 237.0678 | 30576 | 998.8 | 48383 | 100.0 | 0.0078 |
| 8  | 254.0938 | 30242 | 434.5 | 21046 | 43.5  | 0.0084 |
| 9  | 259.0491 | 31515 | 294.7 | 14276 | 29.5  | 0.0082 |
| 10 | 511.3104 | 34741 | 233.4 | 11304 | 23.4  | 0.0147 |

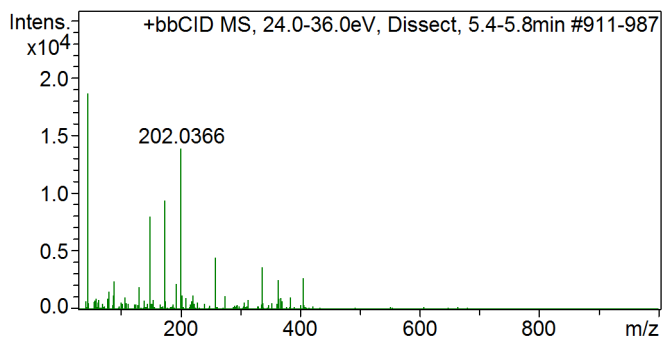

| #  | m/z      | Res.  | S/N   | I     | I %   | FWHM   |
|----|----------|-------|-------|-------|-------|--------|
| 1  | 45.0316  | 15671 | 998.0 | 18696 | 100.0 | 0.0029 |
| 2  | 89.0568  | 19074 | 131.7 | 2468  | 13.2  | 0.0047 |
| 3  | 149.0183 | 24658 | 429.3 | 8042  | 43.0  | 0.0060 |
| 4  | 149.0910 | 25966 | 132.1 | 2474  | 13.2  | 0.0057 |
| 5  | 175.0266 | 26384 | 500.9 | 9384  | 50.2  | 0.0066 |
| 6  | 202.0366 | 28567 | 739.9 | 13860 | 74.1  | 0.0071 |
| 7  | 259.0493 | 29308 | 239.6 | 4488  | 24.0  | 0.0088 |
| 8  | 337.1142 | 28890 | 195.9 | 3669  | 19.6  | 0.0117 |
| 9  | 364.1970 | 30837 | 137.5 | 2575  | 13.8  | 0.0118 |
| 10 | 406.2039 | 30130 | 145.6 | 2728  | 14.6  | 0.0135 |

# Compound Spectrum List Report

## Cmpd 44, Dissect, 5.7 min

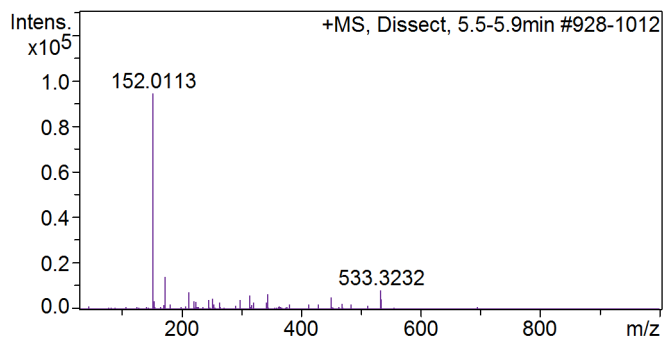

| #  | m/z      | Res.  | S/N   | I     | I %   | FWHM   |
|----|----------|-------|-------|-------|-------|--------|
| 1  | 152.0113 | 26771 | 999.7 | 94297 | 100.0 | 0.0057 |
| 2  | 173.9924 | 28041 | 152.7 | 14401 | 15.3  | 0.0062 |
| 3  | 213.1525 | 28329 | 81.3  | 7673  | 8.1   | 0.0075 |
| 4  | 246.9888 | 30635 | 46.3  | 4363  | 4.6   | 0.0081 |
| 5  | 253.1462 | 29277 | 51.8  | 4886  | 5.2   | 0.0086 |
| 6  | 315.1670 | 29843 | 66.7  | 6292  | 6.7   | 0.0106 |
| 7  | 345.1765 | 31204 | 73.9  | 6969  | 7.4   | 0.0111 |
| 8  | 451.1440 | 33481 | 56.3  | 5309  | 5.6   | 0.0135 |
| 9  | 533.3232 | 34396 | 89.3  | 8422  | 8.9   | 0.0155 |
| 10 | 533.8244 | 33176 | 49.0  | 4625  | 4.9   | 0.0161 |

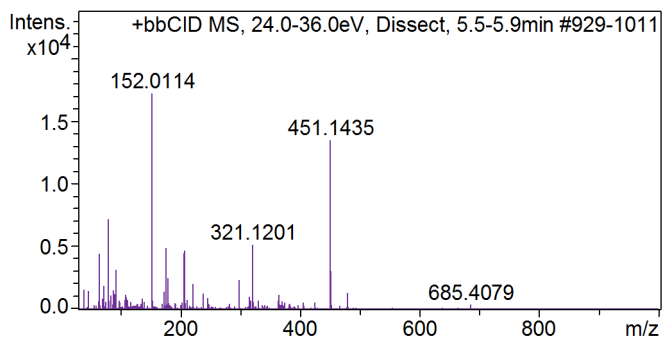

| #  | m/z      | Res.  | S/N   | I     | I %   | FWHM   |
|----|----------|-------|-------|-------|-------|--------|
| 1  | 65.0363  | 17276 | 259.5 | 4469  | 26.0  | 0.0038 |
| 2  | 80.0467  | 18793 | 419.3 | 7220  | 41.9  | 0.0043 |
| 3  | 92.0465  | 19552 | 184.2 | 3172  | 18.4  | 0.0047 |
| 4  | 152.0114 | 25835 | 999.8 | 17216 | 100.0 | 0.0059 |
| 5  | 177.0826 | 27124 | 286.5 | 4933  | 28.7  | 0.0065 |
| 6  | 207.0922 | 28024 | 260.6 | 4487  | 26.1  | 0.0074 |
| 7  | 208.0900 | 26938 | 273.1 | 4702  | 27.3  | 0.0077 |
| 8  | 321.1201 | 31137 | 299.3 | 5154  | 29.9  | 0.0103 |
| 9  | 451.1435 | 32196 | 779.8 | 13428 | 78.0  | 0.0140 |
| 10 | 452.1459 | 30808 | 177.7 | 3060  | 17.8  | 0.0147 |

## Cmpd 45, Dissect, 5.8 min

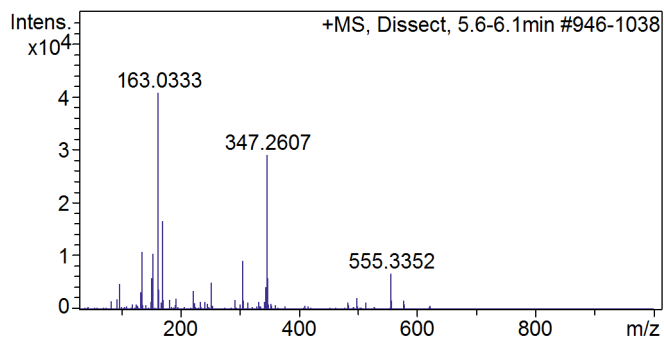

| #  | m/z      | Res.  | S/N   | I     | I %   | FWHM   |
|----|----------|-------|-------|-------|-------|--------|
| 1  | 135.1121 | 24353 | 265.4 | 10831 | 26.6  | 0.0055 |
| 2  | 151.1065 | 25507 | 144.9 | 5915  | 14.5  | 0.0059 |
| 3  | 153.1221 | 25930 | 256.3 | 10461 | 25.6  | 0.0059 |
| 4  | 163.0333 | 26796 | 999.4 | 40788 | 100.0 | 0.0061 |
| 5  | 171.1321 | 26832 | 408.8 | 16685 | 40.9  | 0.0064 |
| 6  | 253.1461 | 28176 | 125.8 | 5135  | 12.6  | 0.0090 |
| 7  | 306.2112 | 32339 | 226.2 | 9231  | 22.6  | 0.0095 |
| 8  | 347.2607 | 32930 | 712.5 | 29080 | 71.3  | 0.0105 |
| 9  | 348.2632 | 29011 | 144.5 | 5895  | 14.5  | 0.0120 |
| 10 | 555.3352 | 32145 | 166.8 | 6809  | 16.7  | 0.0173 |

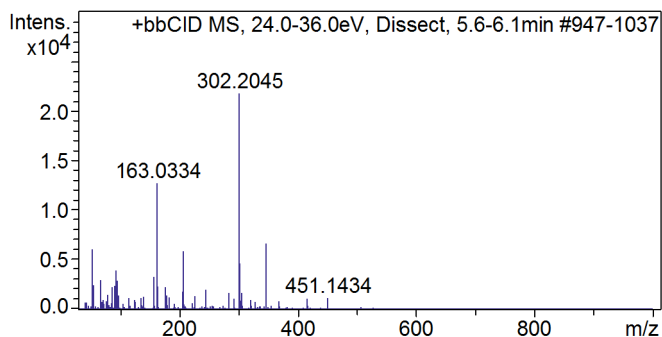

| #  | m/z      | Res.  | S/N   | I     | I %   | FWHM   |
|----|----------|-------|-------|-------|-------|--------|
| 1  | 53.0364  | 16592 | 278.9 | 6084  | 27.9  | 0.0032 |
| 2  | 67.0519  | 17479 | 137.1 | 2991  | 13.7  | 0.0038 |
| 3  | 93.0668  | 19771 | 182.7 | 3985  | 18.3  | 0.0047 |
| 4  | 157.0958 | 23909 | 152.4 | 3324  | 15.3  | 0.0066 |
| 5  | 163.0334 | 26304 | 583.6 | 12730 | 58.4  | 0.0062 |
| 6  | 163.0677 | 25032 | 138.4 | 3020  | 13.9  | 0.0065 |
| 7  | 208.0899 | 28267 | 269.3 | 5875  | 27.0  | 0.0074 |
| 8  | 302.2045 | 31312 | 998.6 | 21784 | 100.0 | 0.0097 |
| 9  | 303.2068 | 28790 | 214.0 | 4669  | 21.4  | 0.0105 |
| 10 | 347.2608 | 30921 | 306.2 | 6679  | 30.7  | 0.0112 |

# Compound Spectrum List Report

## Cmpd 46, Dissect, 5.9 min

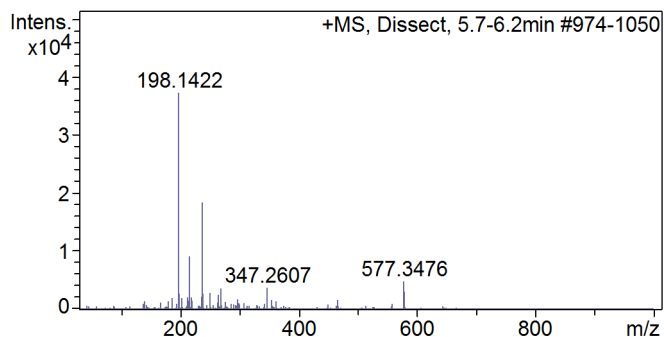

| #  | m/z      | Res.  | S/N   | I     | I %   | FWHM   |
|----|----------|-------|-------|-------|-------|--------|
| 1  | 198.1422 | 29373 | 998.4 | 37288 | 100.0 | 0.0067 |
| 2  | 199.0799 | 27209 | 75.7  | 2826  | 7.6   | 0.0073 |
| 3  | 216.1522 | 29862 | 245.7 | 9177  | 24.6  | 0.0072 |
| 4  | 238.1334 | 30160 | 493.3 | 18424 | 49.4  | 0.0079 |
| 5  | 239.1400 | 28223 | 73.7  | 2754  | 7.4   | 0.0085 |
| 6  | 251.1554 | 30210 | 77.0  | 2875  | 7.7   | 0.0083 |
| 7  | 269.1654 | 29131 | 98.4  | 3673  | 9.9   | 0.0092 |
| 8  | 347.2607 | 32814 | 100.5 | 3754  | 10.1  | 0.0106 |
| 9  | 577.3476 | 33380 | 129.6 | 4841  | 13.0  | 0.0173 |
| 10 | 577.8488 | 34665 | 83.2  | 3107  | 8.3   | 0.0167 |

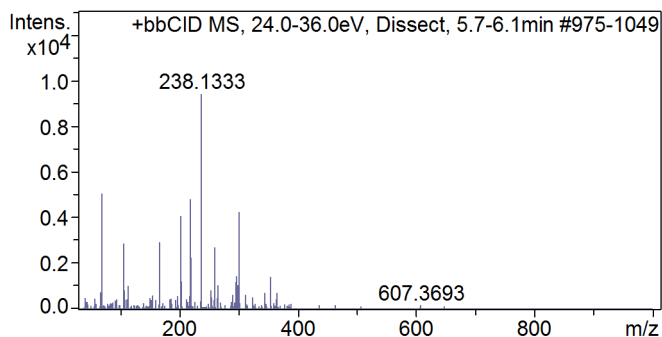

| #  | m/z      | Res.  | S/N   | I    | I %   | FWHM   |
|----|----------|-------|-------|------|-------|--------|
| 1  | 69.0673  | 17920 | 538.2 | 5068 | 53.8  | 0.0039 |
| 2  | 106.0616 | 21882 | 306.8 | 2888 | 30.7  | 0.0048 |
| 3  | 167.9878 | 26855 | 311.9 | 2937 | 31.2  | 0.0063 |
| 4  | 203.0459 | 27682 | 433.1 | 4078 | 43.3  | 0.0073 |
| 5  | 219.0192 | 28182 | 320.5 | 3017 | 32.1  | 0.0078 |
| 6  | 219.1669 | 28030 | 509.9 | 4801 | 51.0  | 0.0078 |
| 7  | 220.1258 | 27504 | 240.7 | 2266 | 24.1  | 0.0080 |
| 8  | 238.1333 | 30072 | 999.8 | 9413 | 100.0 | 0.0079 |
| 9  | 260.1146 | 30545 | 290.2 | 2732 | 29.0  | 0.0085 |
| 10 | 302.2045 | 31584 | 450.4 | 4241 | 45.1  | 0.0096 |

## Cmpd 47, Dissect, 6.0 min

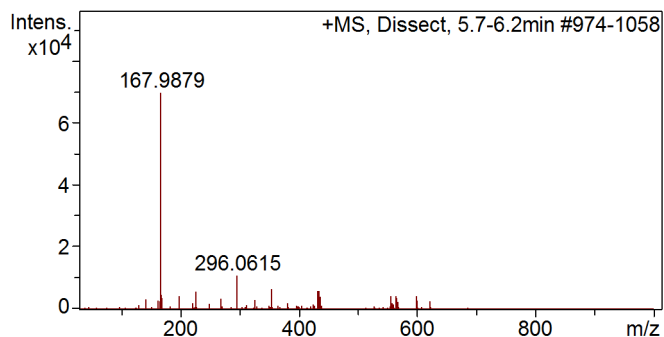

| #  | m/z      | Res.  | S/N   | I     | I %   | FWHM   |
|----|----------|-------|-------|-------|-------|--------|
| 1  | 167.9879 | 27540 | 999.3 | 69665 | 100.0 | 0.0061 |
| 2  | 168.9909 | 22449 | 69.9  | 4870  | 7.0   | 0.0075 |
| 3  | 199.0799 | 27230 | 64.0  | 4459  | 6.4   | 0.0073 |
| 4  | 227.1465 | 29123 | 82.8  | 5771  | 8.3   | 0.0078 |
| 5  | 296.0615 | 31410 | 158.5 | 11047 | 15.9  | 0.0094 |
| 6  | 354.9344 | 31304 | 95.9  | 6682  | 9.6   | 0.0113 |
| 7  | 432.8553 | 31288 | 85.6  | 5966  | 8.6   | 0.0138 |
| 8  | 434.8522 | 32008 | 86.9  | 6056  | 8.7   | 0.0136 |
| 9  | 555.8670 | 38995 | 63.0  | 4392  | 6.3   | 0.0143 |
| 10 | 563.8599 | 30856 | 64.4  | 4490  | 6.4   | 0.0183 |

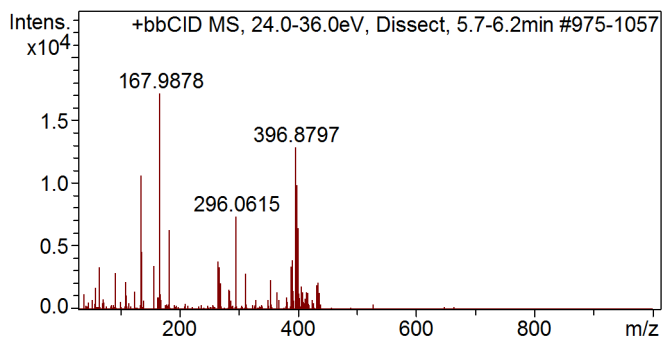

| #  | m/z      | Res.  | S/N   | I     | I %   | FWHM   |
|----|----------|-------|-------|-------|-------|--------|
| 1  | 135.0091 | 24774 | 620.6 | 10629 | 62.1  | 0.0054 |
| 2  | 136.0165 | 22384 | 268.1 | 4592  | 26.8  | 0.0061 |
| 3  | 167.9878 | 26772 | 999.5 | 17118 | 100.0 | 0.0063 |
| 4  | 184.0932 | 26620 | 367.4 | 6292  | 36.8  | 0.0069 |
| 5  | 265.8747 | 30449 | 223.4 | 3827  | 22.4  | 0.0087 |
| 6  | 296.0615 | 30876 | 430.4 | 7372  | 43.1  | 0.0096 |
| 7  | 390.8859 | 28590 | 229.0 | 3921  | 22.9  | 0.0137 |
| 8  | 396.8797 | 32168 | 749.0 | 12827 | 74.9  | 0.0123 |
| 9  | 398.8766 | 30229 | 576.6 | 9875  | 57.7  | 0.0132 |
| 10 | 400.8750 | 30872 | 377.3 | 6461  | 37.7  | 0.0130 |



# Compound Spectrum List Report

## Cmpd 48, Dissect, 6.1 min

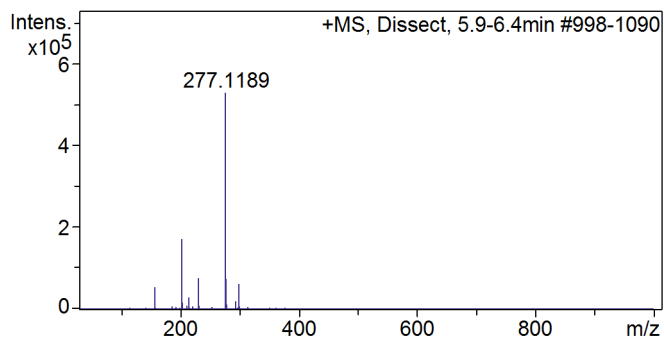

| #  | m/z      | Res.  | S/N   | I      | I %   | FWHM   |
|----|----------|-------|-------|--------|-------|--------|
| 1  | 157.0442 | 26435 | 104.7 | 55934  | 10.6  | 0.0059 |
| 2  | 203.0846 | 30635 | 322.7 | 172470 | 32.6  | 0.0066 |
| 3  | 204.0880 | 28245 | 30.2  | 16143  | 3.1   | 0.0072 |
| 4  | 215.1107 | 28312 | 57.4  | 30669  | 5.8   | 0.0076 |
| 5  | 231.0785 | 30426 | 142.9 | 76377  | 14.4  | 0.0076 |
| 6  | 277.1189 | 34583 | 989.4 | 528799 | 100.0 | 0.0080 |
| 7  | 278.1225 | 31329 | 140.8 | 75264  | 14.2  | 0.0089 |
| 8  | 279.1243 | 28739 | 21.7  | 11625  | 2.2   | 0.0097 |
| 9  | 294.1450 | 32181 | 37.6  | 20082  | 3.8   | 0.0091 |
| 10 | 299.1003 | 33199 | 119.2 | 63719  | 12.0  | 0.0090 |

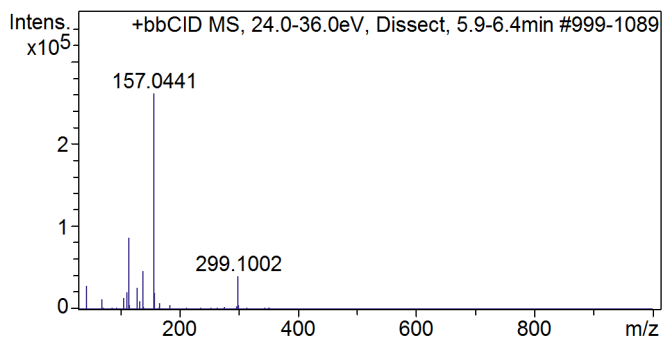

| #  | m/z      | Res.  | S/N   | I      | I %   | FWHM   |
|----|----------|-------|-------|--------|-------|--------|
| 1  | 43.0160  | 15549 | 107.5 | 28666  | 10.9  | 0.0028 |
| 2  | 68.9945  | 17927 | 46.5  | 12394  | 4.7   | 0.0038 |
| 3  | 106.0616 | 21936 | 53.9  | 14378  | 5.5   | 0.0048 |
| 4  | 111.0039 | 22720 | 79.4  | 21173  | 8.1   | 0.0049 |
| 5  | 115.0350 | 23467 | 324.7 | 86585  | 33.1  | 0.0049 |
| 6  | 129.0139 | 24433 | 101.3 | 27016  | 10.3  | 0.0053 |
| 7  | 138.9978 | 25493 | 175.7 | 46848  | 17.9  | 0.0055 |
| 8  | 157.0441 | 28488 | 981.9 | 261830 | 100.0 | 0.0055 |
| 9  | 158.0475 | 25987 | 76.5  | 20397  | 7.8   | 0.0061 |
| 10 | 299.1002 | 34099 | 152.8 | 40749  | 15.6  | 0.0088 |

## Cmpd 49, Dissect, 6.3 min

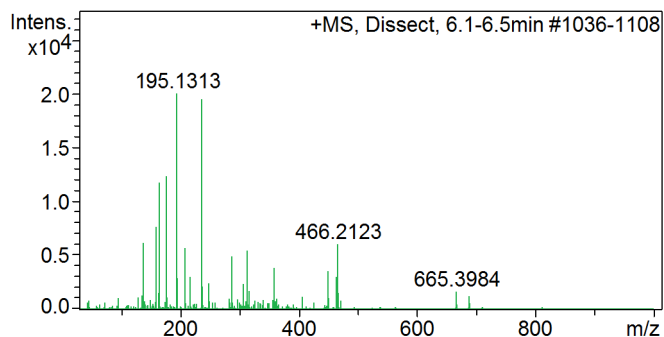

| #  | m/z      | Res.  | S/N   | I     | I %   | FWHM   |
|----|----------|-------|-------|-------|-------|--------|
| 1  | 137.0915 | 24436 | 308.9 | 6199  | 30.9  | 0.0056 |
| 2  | 159.1113 | 26430 | 382.7 | 7680  | 38.3  | 0.0060 |
| 3  | 165.0425 | 26897 | 584.6 | 11730 | 58.5  | 0.0061 |
| 4  | 177.1214 | 27386 | 614.8 | 12337 | 61.5  | 0.0065 |
| 5  | 195.0950 | 27984 | 871.3 | 17484 | 87.2  | 0.0070 |
| 6  | 195.1313 | 28860 | 999.8 | 20062 | 100.0 | 0.0068 |
| 7  | 209.0738 | 28971 | 284.3 | 5705  | 28.4  | 0.0072 |
| 8  | 237.1406 | 30521 | 973.6 | 19535 | 97.4  | 0.0078 |
| 9  | 313.2381 | 30432 | 273.7 | 5491  | 27.4  | 0.0103 |
| 10 | 466.2123 | 30429 | 302.2 | 6063  | 30.2  | 0.0153 |

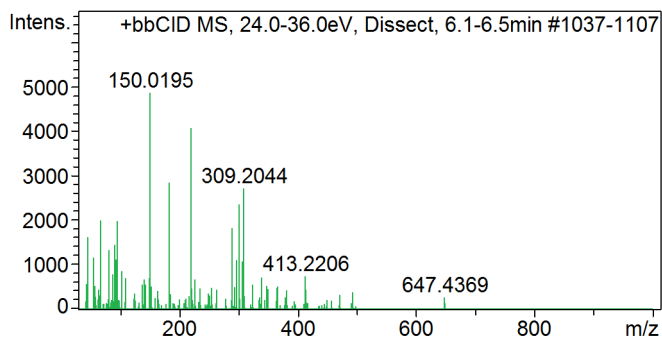

| #  | m/z      | Res.  | S/N   | I    | I %   | FWHM   |
|----|----------|-------|-------|------|-------|--------|
| 1  | 45.0316  | 15647 | 335.5 | 1632 | 33.6  | 0.0029 |
| 2  | 67.0518  | 17335 | 410.9 | 2000 | 41.1  | 0.0039 |
| 3  | 91.0512  | 19713 | 300.2 | 1461 | 30.0  | 0.0046 |
| 4  | 95.0824  | 20167 | 406.6 | 1978 | 40.7  | 0.0047 |
| 5  | 150.0195 | 24834 | 999.0 | 4861 | 100.0 | 0.0060 |
| 6  | 184.1634 | 27963 | 586.2 | 2852 | 58.7  | 0.0066 |
| 7  | 220.1703 | 31134 | 834.4 | 4060 | 83.5  | 0.0071 |
| 8  | 290.2013 | 32099 | 374.6 | 1823 | 37.5  | 0.0090 |
| 9  | 302.2044 | 30286 | 483.3 | 2352 | 48.4  | 0.0100 |
| 10 | 309.2044 | 30125 | 557.3 | 2712 | 55.8  | 0.0103 |

# Compound Spectrum List Report

## Cmpd 50, Dissect, 6.4 min

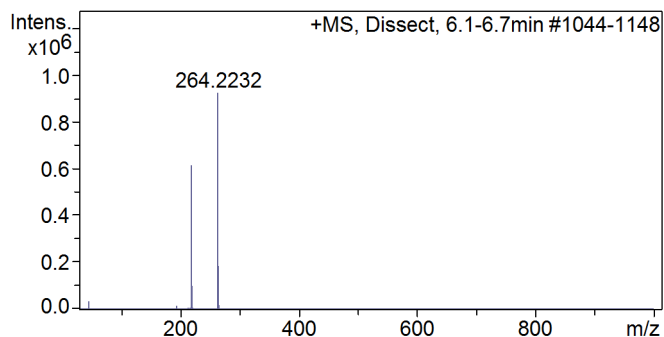

| #  | m/z      | Res.  | S/N   | I      | I %   | FWHM   |
|----|----------|-------|-------|--------|-------|--------|
| 1  | 46.0632  | 15789 | 35.0  | 32885  | 3.6   | 0.0029 |
| 2  | 195.0950 | 27740 | 15.7  | 14779  | 1.6   | 0.0070 |
| 3  | 213.9920 | 29036 | 8.2   | 7718   | 0.8   | 0.0074 |
| 4  | 217.0761 | 28532 | 7.5   | 7025   | 0.8   | 0.0076 |
| 5  | 219.1670 | 32758 | 653.4 | 613352 | 66.4  | 0.0067 |
| 6  | 220.1703 | 29635 | 109.6 | 102880 | 11.1  | 0.0074 |
| 7  | 221.1734 | 26818 | 8.0   | 7554   | 0.8   | 0.0082 |
| 8  | 264.2232 | 35236 | 984.2 | 923913 | 100.0 | 0.0075 |
| 9  | 265.2268 | 31176 | 198.7 | 186507 | 20.2  | 0.0085 |
| 10 | 266.2298 | 28434 | 19.1  | 17904  | 1.9   | 0.0094 |

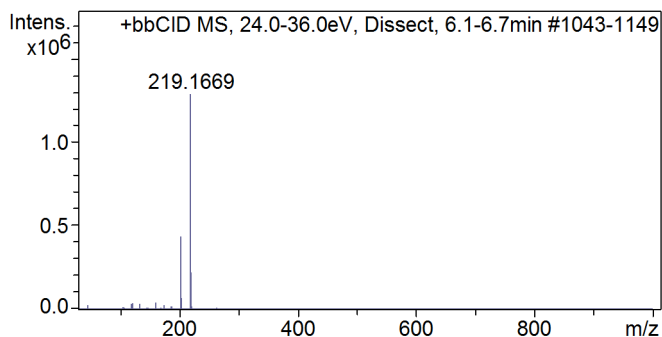

| #  | m/z      | Res.  | S/N   | I       | I %   | FWHM   |
|----|----------|-------|-------|---------|-------|--------|
| 1  | 46.0632  | 15775 | 19.1  | 24809   | 1.9   | 0.0029 |
| 2  | 119.0815 | 23632 | 23.8  | 30787   | 2.4   | 0.0050 |
| 3  | 121.0970 | 23381 | 28.6  | 37035   | 2.9   | 0.0052 |
| 4  | 133.0965 | 24901 | 25.9  | 33574   | 2.6   | 0.0053 |
| 5  | 161.1269 | 27025 | 30.8  | 39865   | 3.1   | 0.0060 |
| 6  | 175.1420 | 27616 | 18.3  | 23679   | 1.8   | 0.0063 |
| 7  | 203.1361 | 31389 | 338.6 | 438882  | 34.0  | 0.0065 |
| 8  | 204.1395 | 29462 | 54.7  | 70884   | 5.5   | 0.0069 |
| 9  | 219.1669 | 33828 | 995.4 | 1290268 | 100.0 | 0.0065 |
| 10 | 220.1703 | 31065 | 173.2 | 224478  | 17.4  | 0.0071 |

## Cmpd 51, Dissect, 6.4 min

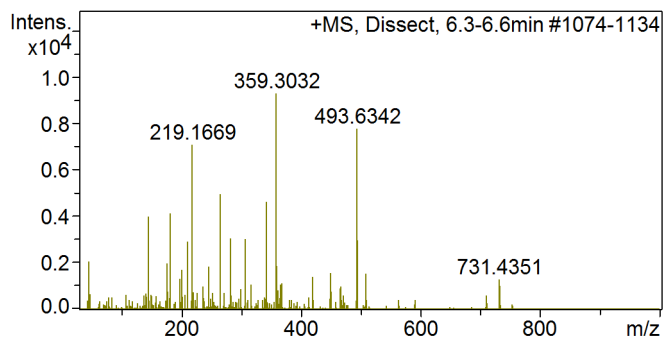

| #  | m/z      | Res.  | S/N    | I    | I %   | FWHM   |
|----|----------|-------|--------|------|-------|--------|
| 1  | 145.0599 | 24943 | 429.8  | 4000 | 43.0  | 0.0058 |
| 2  | 181.9666 | 28902 | 443.8  | 4131 | 44.4  | 0.0063 |
| 3  | 219.1669 | 32147 | 759.7  | 7071 | 76.0  | 0.0068 |
| 4  | 265.2267 | 30856 | 531.4  | 4946 | 53.1  | 0.0086 |
| 5  | 283.1649 | 27357 | 328.5  | 3057 | 32.8  | 0.0104 |
| 6  | 342.2522 | 29904 | 496.8  | 4623 | 49.7  | 0.0114 |
| 7  | 359.1916 | 29919 | 601.4  | 5597 | 60.1  | 0.0120 |
| 8  | 359.3032 | 32242 | 1000.0 | 9307 | 100.0 | 0.0111 |
| 9  | 493.6342 | 34807 | 832.9  | 7752 | 83.3  | 0.0142 |
| 10 | 493.9690 | 36375 | 616.9  | 5742 | 61.7  | 0.0136 |

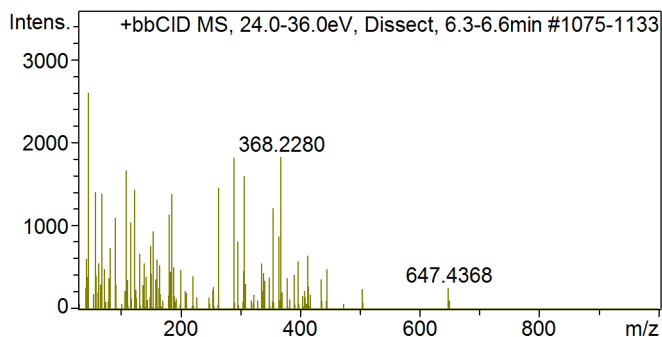

| #  | m/z      | Res.  | S/N   | I    | I %   | FWHM   |
|----|----------|-------|-------|------|-------|--------|
| 1  | 46.0632  | 15767 | 998.7 | 2599 | 100.0 | 0.0029 |
| 2  | 58.0628  | 16901 | 540.6 | 1407 | 54.1  | 0.0034 |
| 3  | 69.0673  | 18065 | 533.9 | 1390 | 53.5  | 0.0038 |
| 4  | 109.0612 | 22121 | 641.6 | 1670 | 64.2  | 0.0049 |
| 5  | 123.9365 | 23420 | 551.4 | 1435 | 55.2  | 0.0053 |
| 6  | 186.1296 | 26491 | 532.4 | 1386 | 53.3  | 0.0070 |
| 7  | 264.2232 | 29804 | 560.8 | 1459 | 56.1  | 0.0089 |
| 8  | 290.2016 | 27270 | 698.8 | 1819 | 70.0  | 0.0106 |
| 9  | 307.2274 | 30820 | 613.5 | 1597 | 61.4  | 0.0100 |
| 10 | 368.2280 | 30057 | 701.4 | 1826 | 70.2  | 0.0123 |

# Compound Spectrum List Report

## Cmpd 52, Dissect, 6.6 min

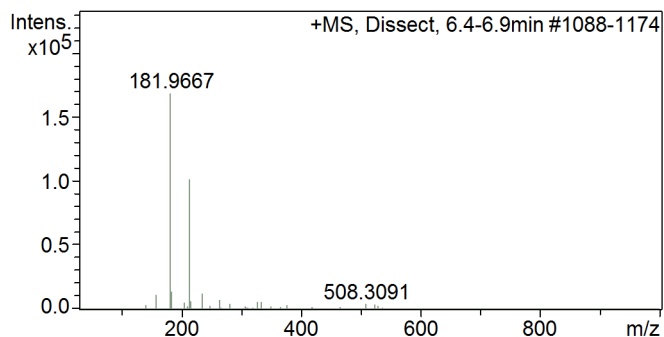

| #  | m/z      | Res.  | S/N   | I      | I %   | FWHM   |
|----|----------|-------|-------|--------|-------|--------|
| 1  | 158.0217 | 26692 | 68.2  | 11510  | 6.8   | 0.0059 |
| 2  | 181.9667 | 29374 | 997.9 | 168528 | 100.0 | 0.0062 |
| 3  | 182.9696 | 24743 | 81.7  | 13793  | 8.2   | 0.0074 |
| 4  | 183.9625 | 27592 | 82.8  | 13978  | 8.3   | 0.0067 |
| 5  | 213.9919 | 30082 | 256.5 | 43310  | 25.7  | 0.0071 |
| 6  | 214.0825 | 31759 | 600.5 | 101419 | 60.2  | 0.0067 |
| 7  | 215.0855 | 27659 | 36.6  | 6188   | 3.7   | 0.0078 |
| 8  | 216.0785 | 27475 | 36.8  | 6219   | 3.7   | 0.0079 |
| 9  | 236.0639 | 30355 | 76.4  | 12906  | 7.7   | 0.0078 |
| 10 | 264.2233 | 31727 | 42.2  | 7126   | 4.2   | 0.0083 |

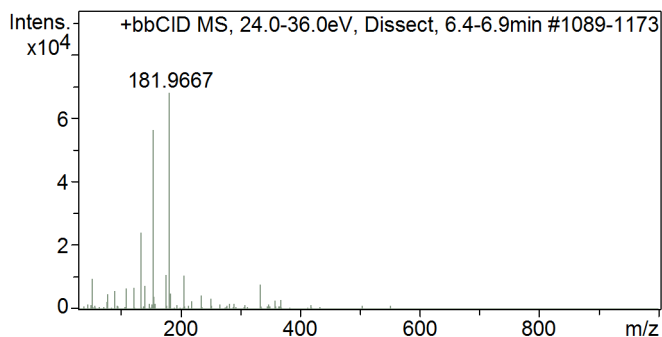

| #  | m/z      | Res.  | S/N   | I     | I %   | FWHM   |
|----|----------|-------|-------|-------|-------|--------|
| 1  | 53.0364  | 17063 | 142.1 | 9725  | 14.3  | 0.0031 |
| 2  | 110.0023 | 22643 | 96.9  | 6629  | 9.7   | 0.0049 |
| 3  | 122.0017 | 23758 | 102.1 | 6989  | 10.3  | 0.0051 |
| 4  | 134.0013 | 25193 | 354.2 | 24244 | 35.6  | 0.0053 |
| 5  | 140.9958 | 25330 | 109.5 | 7494  | 11.0  | 0.0056 |
| 6  | 153.9727 | 26717 | 821.9 | 56251 | 82.7  | 0.0058 |
| 7  | 177.0822 | 30399 | 161.0 | 11020 | 16.2  | 0.0058 |
| 8  | 181.9667 | 28974 | 993.7 | 68008 | 100.0 | 0.0063 |
| 9  | 207.0919 | 32165 | 157.4 | 10769 | 15.8  | 0.0064 |
| 10 | 334.0065 | 32418 | 114.6 | 7846  | 11.5  | 0.0103 |

## Cmpd 53, Dissect, 6.7 min

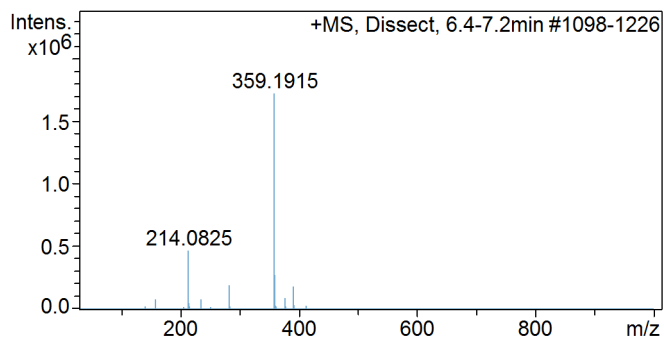

| #  | m/z      | Res.  | S/N   | I       | I %   | FWHM   |
|----|----------|-------|-------|---------|-------|--------|
| 1  | 158.0217 | 26844 | 46.9  | 81404   | 4.7   | 0.0059 |
| 2  | 214.0825 | 32436 | 269.8 | 468695  | 27.2  | 0.0066 |
| 3  | 215.0856 | 27694 | 28.2  | 49011   | 2.8   | 0.0078 |
| 4  | 236.0638 | 30777 | 48.0  | 83352   | 4.8   | 0.0077 |
| 5  | 283.1420 | 33345 | 113.6 | 197303  | 11.5  | 0.0085 |
| 6  | 359.1915 | 41412 | 991.3 | 1722256 | 100.0 | 0.0087 |
| 7  | 360.1946 | 34822 | 160.9 | 279617  | 16.2  | 0.0103 |
| 8  | 377.2026 | 29720 | 54.9  | 95337   | 5.5   | 0.0127 |
| 9  | 391.2169 | 34119 | 107.0 | 185936  | 10.8  | 0.0115 |
| 10 | 392.2198 | 30170 | 19.3  | 33546   | 1.9   | 0.0130 |

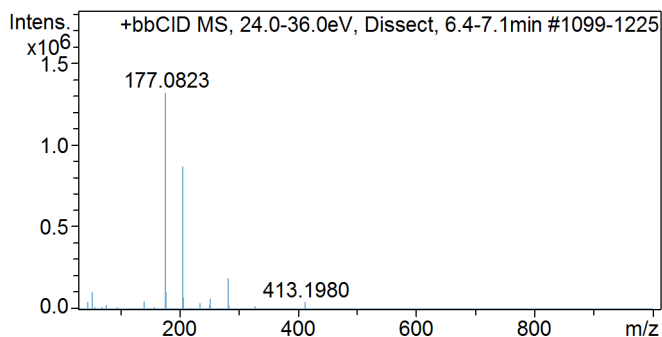

| #  | m/z      | Res.  | S/N   | I       | I %   | FWHM   |
|----|----------|-------|-------|---------|-------|--------|
| 1  | 45.0316  | 15684 | 34.0  | 46149   | 3.5   | 0.0029 |
| 2  | 53.0364  | 17129 | 79.7  | 108269  | 8.2   | 0.0031 |
| 3  | 140.9958 | 25271 | 36.3  | 49263   | 3.7   | 0.0056 |
| 4  | 177.0823 | 30881 | 969.9 | 1316753 | 100.0 | 0.0057 |
| 5  | 178.0852 | 25962 | 79.1  | 107416  | 8.2   | 0.0069 |
| 6  | 207.0919 | 32616 | 638.1 | 866244  | 65.8  | 0.0063 |
| 7  | 208.0948 | 26989 | 56.6  | 76887   | 5.8   | 0.0077 |
| 8  | 253.1324 | 31463 | 49.5  | 67233   | 5.1   | 0.0080 |
| 9  | 283.1420 | 34094 | 140.8 | 191169  | 14.5  | 0.0083 |
| 10 | 413.1980 | 32560 | 34.0  | 46195   | 3.5   | 0.0127 |

# Compound Spectrum List Report

## Cmpd 54, Dissect, 6.8 min

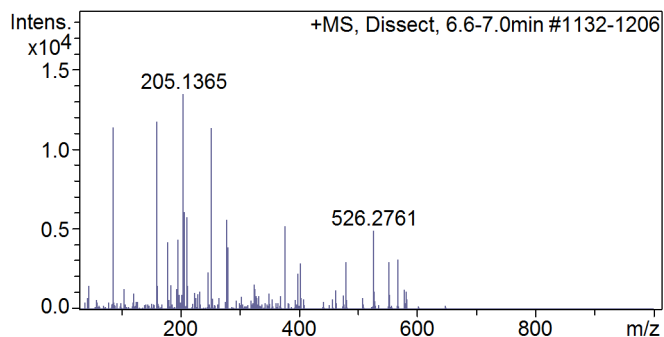

| #  | m/z      | Res.  | S/N   | I     | I %   | FWHM   |
|----|----------|-------|-------|-------|-------|--------|
| 1  | 87.0411  | 19500 | 840.4 | 11371 | 84.3  | 0.0045 |
| 2  | 161.1270 | 26583 | 865.9 | 11716 | 86.9  | 0.0061 |
| 3  | 205.1365 | 28718 | 996.6 | 13485 | 100.0 | 0.0071 |
| 4  | 207.9817 | 28436 | 450.6 | 6097  | 45.2  | 0.0073 |
| 5  | 212.0128 | 28065 | 419.5 | 5676  | 42.1  | 0.0076 |
| 6  | 212.1574 | 29095 | 425.5 | 5757  | 42.7  | 0.0073 |
| 7  | 253.0381 | 29948 | 835.4 | 11304 | 83.8  | 0.0084 |
| 8  | 279.0529 | 30171 | 415.7 | 5624  | 41.7  | 0.0092 |
| 9  | 377.2028 | 32167 | 385.9 | 5221  | 38.7  | 0.0117 |
| 10 | 526.2761 | 34422 | 364.1 | 4926  | 36.5  | 0.0153 |

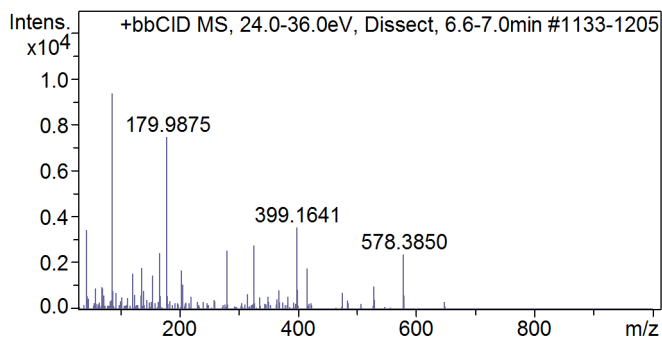

| #  | m/z      | Res.  | S/N   | I    | I %   | FWHM   |
|----|----------|-------|-------|------|-------|--------|
| 1  | 43.0160  | 15531 | 368.4 | 3453 | 36.9  | 0.0028 |
| 2  | 87.0411  | 19510 | 999.4 | 9367 | 100.0 | 0.0045 |
| 3  | 136.0170 | 24711 | 193.7 | 1816 | 19.4  | 0.0055 |
| 4  | 167.9878 | 27251 | 260.5 | 2441 | 26.1  | 0.0062 |
| 5  | 179.9875 | 27825 | 795.2 | 7452 | 79.6  | 0.0065 |
| 6  | 281.1058 | 31978 | 274.0 | 2568 | 27.4  | 0.0088 |
| 7  | 326.2192 | 30559 | 296.4 | 2778 | 29.7  | 0.0107 |
| 8  | 399.1641 | 29956 | 381.0 | 3570 | 38.1  | 0.0133 |
| 9  | 416.3379 | 32321 | 190.5 | 1785 | 19.1  | 0.0129 |
| 10 | 578.3850 | 31442 | 255.4 | 2393 | 25.5  | 0.0184 |

## Cmpd 55, Dissect, 6.9 min

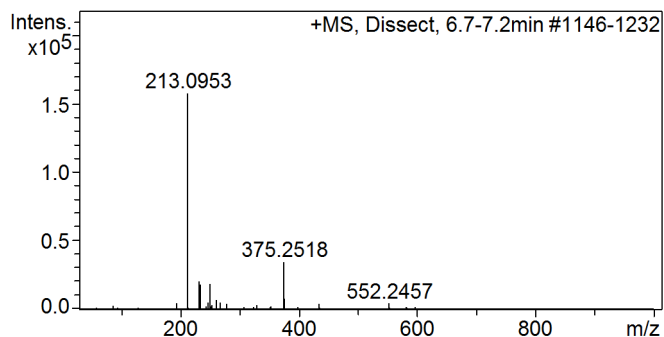

| #  | m/z      | Res.  | S/N   | I      | I %   | FWHM   |
|----|----------|-------|-------|--------|-------|--------|
| 1  | 213.0953 | 29911 | 996.2 | 157819 | 100.0 | 0.0071 |
| 2  | 232.1621 | 29916 | 131.0 | 20750  | 13.1  | 0.0078 |
| 3  | 233.1458 | 30699 | 89.7  | 14215  | 9.0   | 0.0076 |
| 4  | 235.0764 | 29309 | 117.0 | 18534  | 11.7  | 0.0080 |
| 5  | 248.0118 | 30328 | 29.6  | 4686   | 3.0   | 0.0082 |
| 6  | 251.1560 | 30957 | 117.7 | 18643  | 11.8  | 0.0081 |
| 7  | 262.0270 | 30105 | 46.1  | 7306   | 4.6   | 0.0087 |
| 8  | 268.1813 | 29707 | 29.9  | 4735   | 3.0   | 0.0090 |
| 9  | 375.2518 | 33580 | 218.6 | 34637  | 21.9  | 0.0112 |
| 10 | 376.2549 | 30121 | 51.1  | 8095   | 5.1   | 0.0125 |

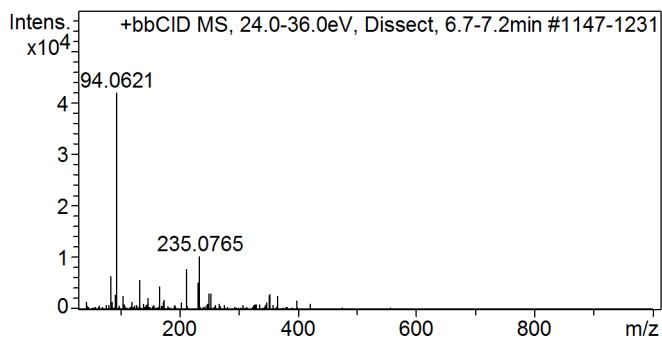

| #  | m/z      | Res.  | S/N   | I     | I %   | FWHM   |
|----|----------|-------|-------|-------|-------|--------|
| 1  | 84.0779  | 19105 | 154.0 | 6468  | 15.4  | 0.0044 |
| 2  | 94.0621  | 19727 | 998.7 | 41949 | 100.0 | 0.0048 |
| 3  | 133.0967 | 24540 | 135.8 | 5704  | 13.6  | 0.0054 |
| 4  | 167.9880 | 26867 | 106.8 | 4485  | 10.7  | 0.0063 |
| 5  | 213.0953 | 28319 | 188.1 | 7903  | 18.8  | 0.0075 |
| 6  | 232.1622 | 30884 | 125.0 | 5251  | 12.5  | 0.0075 |
| 7  | 235.0765 | 28823 | 245.4 | 10309 | 24.6  | 0.0082 |
| 8  | 251.0498 | 30143 | 75.0  | 3152  | 7.5   | 0.0083 |
| 9  | 254.1643 | 29158 | 75.8  | 3182  | 7.6   | 0.0087 |
| 10 | 353.2375 | 29100 | 70.9  | 2979  | 7.1   | 0.0121 |

# Compound Spectrum List Report

## Cmpd 56, Dissect, 7.1 min

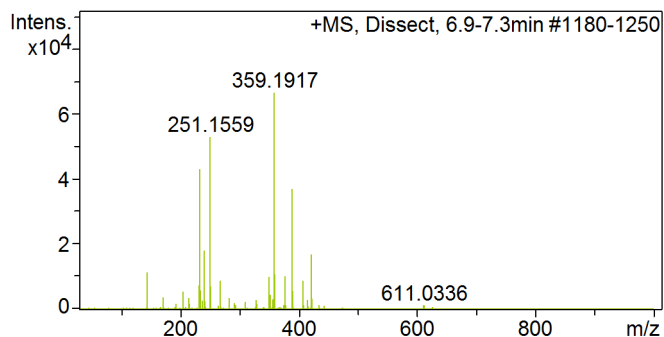

| #  | m/z      | Res.  | S/N   | I     | I %   | FWHM   |
|----|----------|-------|-------|-------|-------|--------|
| 1  | 144.1334 | 25594 | 171.3 | 11395 | 17.1  | 0.0056 |
| 2  | 233.1459 | 31072 | 646.3 | 42996 | 64.7  | 0.0075 |
| 3  | 241.1176 | 30136 | 272.0 | 18095 | 27.2  | 0.0080 |
| 4  | 251.1559 | 31037 | 794.0 | 52823 | 79.5  | 0.0081 |
| 5  | 350.2185 | 32042 | 150.7 | 10028 | 15.1  | 0.0109 |
| 6  | 359.1917 | 33920 | 999.1 | 66474 | 100.0 | 0.0106 |
| 7  | 360.1944 | 29488 | 164.7 | 10958 | 16.5  | 0.0122 |
| 8  | 377.2024 | 37621 | 155.6 | 10351 | 15.6  | 0.0100 |
| 9  | 389.2010 | 33152 | 556.6 | 37028 | 55.7  | 0.0117 |
| 10 | 421.2266 | 31890 | 255.7 | 17009 | 25.6  | 0.0132 |

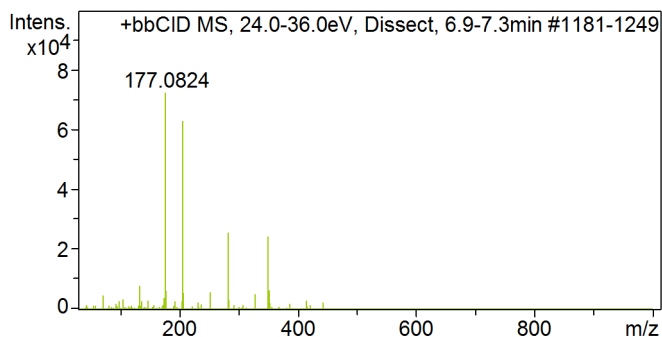

| #  | m/z      | Res.  | S/N   | I     | I %   | FWHM   |
|----|----------|-------|-------|-------|-------|--------|
| 1  | 133.0967 | 24811 | 109.1 | 7893  | 10.9  | 0.0054 |
| 2  | 177.0824 | 28582 | 999.3 | 72273 | 100.0 | 0.0062 |
| 3  | 178.0851 | 22724 | 87.7  | 6346  | 8.8   | 0.0078 |
| 4  | 207.0920 | 30391 | 866.7 | 62682 | 86.7  | 0.0068 |
| 5  | 208.0949 | 24031 | 79.2  | 5730  | 7.9   | 0.0087 |
| 6  | 253.1322 | 29974 | 79.9  | 5778  | 8.0   | 0.0084 |
| 7  | 283.1421 | 32699 | 355.6 | 25719 | 35.6  | 0.0087 |
| 8  | 329.1821 | 30537 | 71.4  | 5160  | 7.1   | 0.0108 |
| 9  | 350.2184 | 32704 | 336.7 | 24348 | 33.7  | 0.0107 |
| 10 | 352.2340 | 34147 | 88.9  | 6431  | 8.9   | 0.0103 |

## Cmpd 57, Dissect, 7.1 min

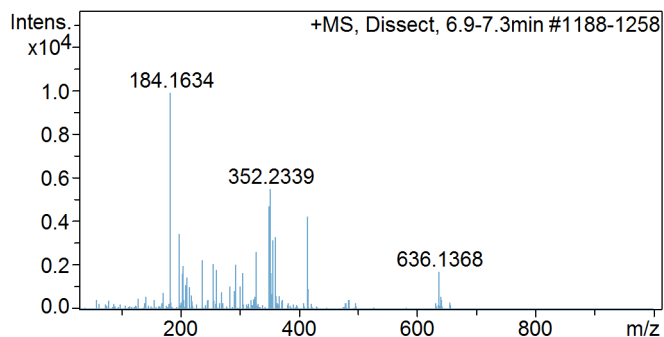

| #  | m/z      | Res.  | S/N   | I    | I %   | FWHM   |
|----|----------|-------|-------|------|-------|--------|
| 1  | 184.1634 | 27426 | 999.8 | 9899 | 100.0 | 0.0067 |
| 2  | 199.1164 | 27228 | 349.2 | 3457 | 34.9  | 0.0073 |
| 3  | 238.1711 | 28591 | 229.1 | 2269 | 22.9  | 0.0083 |
| 4  | 256.0821 | 28977 | 210.8 | 2087 | 21.1  | 0.0088 |
| 5  | 328.2373 | 31162 | 267.8 | 2651 | 26.8  | 0.0105 |
| 6  | 350.2185 | 32244 | 477.2 | 4724 | 47.7  | 0.0109 |
| 7  | 352.2339 | 32768 | 555.8 | 5503 | 55.6  | 0.0107 |
| 8  | 356.2678 | 30527 | 319.9 | 3167 | 32.0  | 0.0117 |
| 9  | 361.2096 | 30538 | 334.8 | 3314 | 33.5  | 0.0118 |
| 10 | 415.1876 | 31702 | 429.6 | 4253 | 43.0  | 0.0131 |

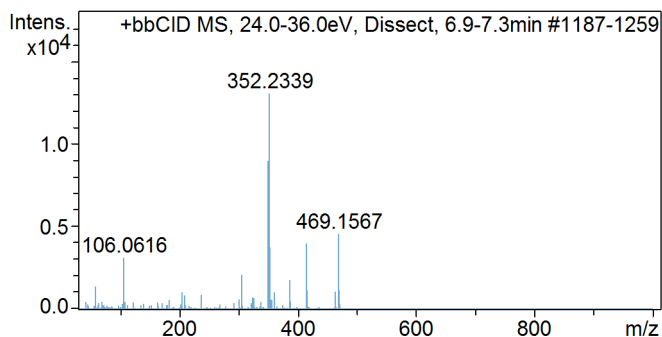

| #  | m/z      | Res.  | S/N   | I     | I %   | FWHM   |
|----|----------|-------|-------|-------|-------|--------|
| 1  | 58.0628  | 17230 | 107.9 | 1411  | 10.8  | 0.0034 |
| 2  | 106.0616 | 22046 | 240.9 | 3153  | 24.1  | 0.0048 |
| 3  | 306.1939 | 29909 | 159.5 | 2086  | 15.9  | 0.0102 |
| 4  | 350.2183 | 32311 | 687.4 | 8995  | 68.8  | 0.0108 |
| 5  | 351.2214 | 30834 | 174.3 | 2281  | 17.4  | 0.0114 |
| 6  | 352.2339 | 34128 | 999.8 | 13083 | 100.0 | 0.0103 |
| 7  | 353.2372 | 30693 | 288.0 | 3769  | 28.8  | 0.0115 |
| 8  | 387.1570 | 28927 | 138.1 | 1807  | 13.8  | 0.0134 |
| 9  | 415.1877 | 31664 | 306.3 | 4008  | 30.6  | 0.0131 |
| 10 | 469.1567 | 31667 | 350.5 | 4586  | 35.1  | 0.0148 |

# Compound Spectrum List Report

## Cmpd 58, Dissect, 7.2 min

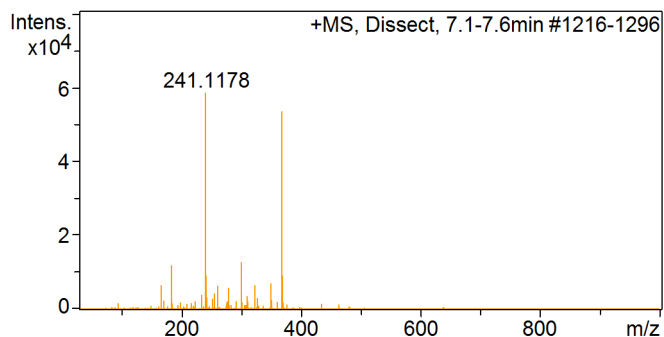

| #  | m/z      | Res.  | S/N   | I     | I %   | FWHM   |
|----|----------|-------|-------|-------|-------|--------|
| 1  | 167.1011 | 26626 | 112.7 | 6603  | 11.3  | 0.0063 |
| 2  | 184.1634 | 27531 | 205.2 | 12028 | 20.5  | 0.0067 |
| 3  | 241.1178 | 31216 | 999.5 | 58580 | 100.0 | 0.0077 |
| 4  | 242.1210 | 29301 | 157.9 | 9257  | 15.8  | 0.0083 |
| 5  | 261.1764 | 30147 | 111.5 | 6532  | 11.2  | 0.0087 |
| 6  | 301.1676 | 30376 | 219.4 | 12859 | 22.0  | 0.0099 |
| 7  | 323.0778 | 31737 | 112.5 | 6592  | 11.3  | 0.0102 |
| 8  | 350.2186 | 32449 | 123.4 | 7233  | 12.3  | 0.0108 |
| 9  | 368.0754 | 33659 | 913.1 | 53518 | 91.4  | 0.0109 |
| 10 | 369.0784 | 29913 | 158.1 | 9267  | 15.8  | 0.0123 |

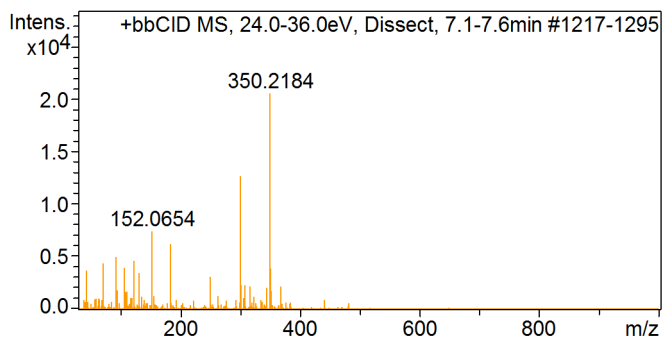

| #  | m/z      | Res.  | S/N   | I     | I %   | FWHM   |
|----|----------|-------|-------|-------|-------|--------|
| 1  | 43.0160  | 15459 | 181.8 | 3743  | 18.2  | 0.0028 |
| 2  | 71.0465  | 17893 | 214.5 | 4415  | 21.5  | 0.0040 |
| 3  | 92.0465  | 19871 | 243.7 | 5015  | 24.4  | 0.0046 |
| 4  | 106.0616 | 22011 | 192.1 | 3955  | 19.2  | 0.0048 |
| 5  | 122.0560 | 23532 | 226.4 | 4660  | 22.7  | 0.0052 |
| 6  | 152.0654 | 25581 | 360.2 | 7415  | 36.1  | 0.0059 |
| 7  | 184.0366 | 28739 | 301.8 | 6213  | 30.2  | 0.0064 |
| 8  | 301.1675 | 30266 | 615.5 | 12669 | 61.6  | 0.0100 |
| 9  | 350.2184 | 32188 | 999.2 | 20567 | 100.0 | 0.0109 |
| 10 | 351.2216 | 31115 | 190.6 | 3923  | 19.1  | 0.0113 |

## Cmpd 59, Dissect, 7.4 min

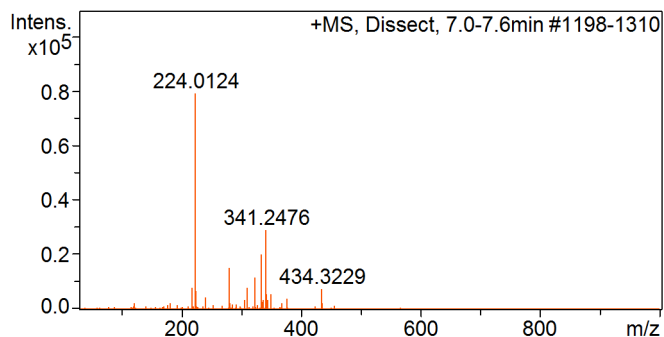

| #  | m/z      | Res.  | S/N   | I     | I %   | FWHM   |
|----|----------|-------|-------|-------|-------|--------|
| 1  | 219.1670 | 28655 | 101.6 | 8046  | 10.2  | 0.0076 |
| 2  | 224.0124 | 29578 | 999.3 | 79108 | 100.0 | 0.0076 |
| 3  | 225.0153 | 27080 | 87.6  | 6933  | 8.8   | 0.0083 |
| 4  | 281.1056 | 31610 | 193.6 | 15325 | 19.4  | 0.0089 |
| 5  | 310.2274 | 31752 | 101.6 | 8045  | 10.2  | 0.0098 |
| 6  | 323.0777 | 31269 | 149.9 | 11864 | 15.0  | 0.0103 |
| 7  | 334.2265 | 31877 | 254.3 | 20127 | 25.4  | 0.0105 |
| 8  | 341.2476 | 31970 | 367.6 | 29100 | 36.8  | 0.0107 |
| 9  | 342.2508 | 30231 | 72.3  | 5722  | 7.2   | 0.0113 |
| 10 | 434.3229 | 30874 | 96.9  | 7668  | 9.7   | 0.0141 |

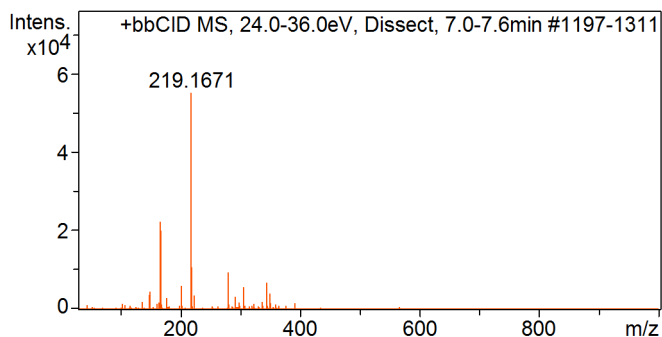

| #  | m/z      | Res.  | S/N   | I     | I %   | FWHM   |
|----|----------|-------|-------|-------|-------|--------|
| 1  | 149.0183 | 25782 | 84.1  | 4641  | 8.4   | 0.0058 |
| 2  | 166.9802 | 26943 | 405.5 | 22379 | 40.6  | 0.0062 |
| 3  | 167.9878 | 26296 | 364.6 | 20121 | 36.5  | 0.0064 |
| 4  | 203.1363 | 28022 | 110.6 | 6102  | 11.1  | 0.0072 |
| 5  | 219.1671 | 29896 | 999.3 | 55150 | 100.0 | 0.0073 |
| 6  | 220.1704 | 29012 | 197.3 | 10890 | 19.7  | 0.0076 |
| 7  | 281.1056 | 31512 | 171.1 | 9440  | 17.1  | 0.0089 |
| 8  | 306.1937 | 30917 | 104.0 | 5741  | 10.4  | 0.0099 |
| 9  | 345.0587 | 30979 | 125.0 | 6898  | 12.5  | 0.0111 |
| 10 | 350.2184 | 32171 | 73.8  | 4075  | 7.4   | 0.0109 |

# Compound Spectrum List Report

## Cmpd 60, Dissect, 7.4 min

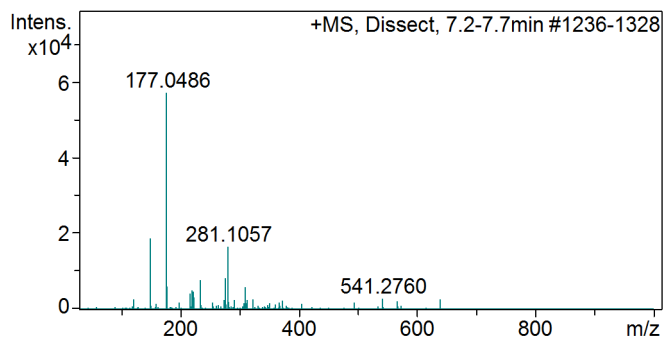

| #  | m/z      | Res.  | S/N   | I     | I %   | FWHM   |
|----|----------|-------|-------|-------|-------|--------|
| 1  | 149.0183 | 25524 | 328.2 | 18761 | 32.8  | 0.0058 |
| 2  | 177.0486 | 27828 | 999.7 | 57154 | 100.0 | 0.0064 |
| 3  | 178.0519 | 27750 | 106.2 | 6070  | 10.6  | 0.0064 |
| 4  | 217.1515 | 28092 | 75.8  | 4336  | 7.6   | 0.0077 |
| 5  | 221.0671 | 28087 | 90.3  | 5165  | 9.0   | 0.0079 |
| 6  | 223.0891 | 28496 | 84.9  | 4855  | 8.5   | 0.0078 |
| 7  | 235.1614 | 29847 | 135.8 | 7764  | 13.6  | 0.0079 |
| 8  | 277.1706 | 31018 | 146.7 | 8390  | 14.7  | 0.0089 |
| 9  | 281.1057 | 32208 | 290.8 | 16628 | 29.1  | 0.0087 |
| 10 | 310.2274 | 31466 | 103.8 | 5935  | 10.4  | 0.0099 |

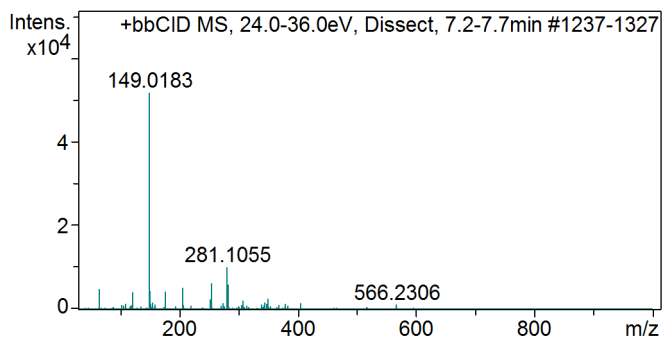

| #  | m/z      | Res.  | S/N   | I     | I %   | FWHM   |
|----|----------|-------|-------|-------|-------|--------|
| 1  | 65.0363  | 17046 | 96.9  | 5014  | 9.7   | 0.0038 |
| 2  | 121.0244 | 22936 | 81.5  | 4216  | 8.2   | 0.0053 |
| 3  | 149.0183 | 26138 | 999.9 | 51714 | 100.0 | 0.0057 |
| 4  | 149.0911 | 26008 | 71.1  | 3679  | 7.1   | 0.0057 |
| 5  | 150.0215 | 25757 | 85.7  | 4433  | 8.6   | 0.0058 |
| 6  | 177.0826 | 26256 | 85.3  | 4410  | 8.5   | 0.0067 |
| 7  | 207.0922 | 28175 | 102.6 | 5308  | 10.3  | 0.0074 |
| 8  | 255.0553 | 28947 | 122.0 | 6312  | 12.2  | 0.0088 |
| 9  | 281.1055 | 31875 | 194.4 | 10057 | 19.4  | 0.0088 |
| 10 | 283.1422 | 30649 | 117.5 | 6078  | 11.8  | 0.0092 |

## Cmpd 61, Dissect, 7.6 min

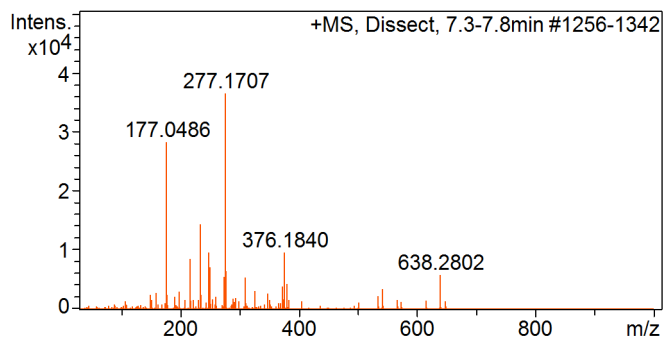

| #  | m/z      | Res.  | S/N   | I     | I %   | FWHM   |
|----|----------|-------|-------|-------|-------|--------|
| 1  | 177.0486 | 27426 | 772.2 | 28247 | 77.2  | 0.0065 |
| 2  | 217.1513 | 28675 | 234.9 | 8594  | 23.5  | 0.0076 |
| 3  | 235.1614 | 30147 | 394.1 | 14414 | 39.4  | 0.0078 |
| 4  | 249.1403 | 30551 | 265.4 | 9707  | 26.5  | 0.0082 |
| 5  | 251.0620 | 30039 | 195.5 | 7152  | 19.6  | 0.0084 |
| 6  | 275.1529 | 30391 | 152.2 | 5566  | 15.2  | 0.0091 |
| 7  | 277.1707 | 32057 | 999.9 | 36575 | 100.0 | 0.0086 |
| 8  | 278.1739 | 28537 | 177.9 | 6508  | 17.8  | 0.0097 |
| 9  | 376.1840 | 31452 | 265.4 | 9708  | 26.5  | 0.0120 |
| 10 | 638.2802 | 32072 | 159.8 | 5844  | 16.0  | 0.0199 |

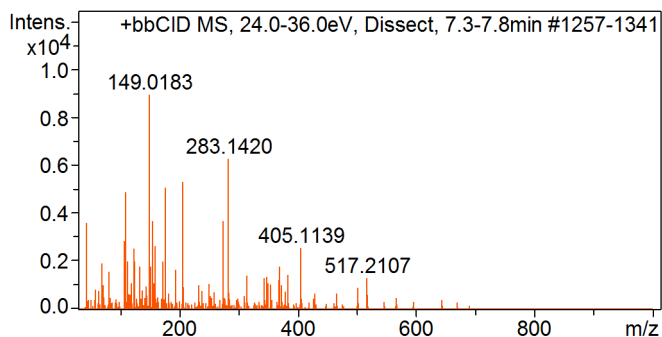

| #  | m/z      | Res.  | S/N   | I    | I %   | FWHM   |
|----|----------|-------|-------|------|-------|--------|
| 1  | 43.0160  | 15547 | 401.2 | 3598 | 40.1  | 0.0028 |
| 2  | 107.0820 | 21943 | 319.5 | 2865 | 32.0  | 0.0049 |
| 3  | 109.0612 | 22318 | 544.4 | 4881 | 54.4  | 0.0049 |
| 4  | 109.0976 | 21732 | 314.9 | 2824 | 31.5  | 0.0050 |
| 5  | 149.0183 | 25748 | 999.9 | 8966 | 100.0 | 0.0058 |
| 6  | 155.0649 | 26320 | 410.6 | 3682 | 41.1  | 0.0059 |
| 7  | 177.0828 | 25827 | 564.7 | 5064 | 56.5  | 0.0069 |
| 8  | 207.0923 | 27905 | 592.2 | 5310 | 59.2  | 0.0074 |
| 9  | 275.1528 | 29778 | 409.9 | 3676 | 41.0  | 0.0092 |
| 10 | 283.1420 | 30914 | 699.0 | 6268 | 69.9  | 0.0092 |

# Compound Spectrum List Report

## Cmpd 62, Dissect, 7.6 min

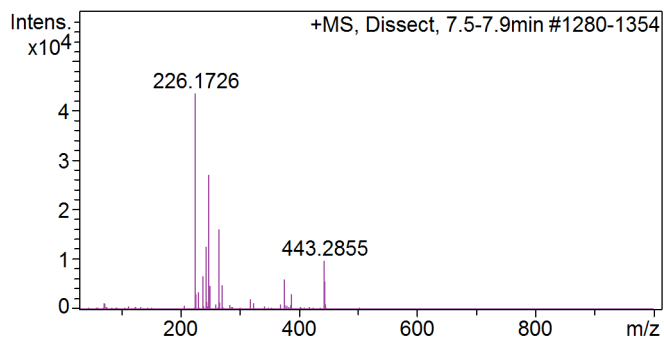

| #  | m/z      | Res.  | S/N    | I     | I %   | FWHM   |
|----|----------|-------|--------|-------|-------|--------|
| 1  | 226.0280 | 28856 | 186.3  | 8118  | 18.6  | 0.0078 |
| 2  | 226.1726 | 30180 | 1000.0 | 43571 | 100.0 | 0.0075 |
| 3  | 239.0228 | 29600 | 153.5  | 6690  | 15.4  | 0.0081 |
| 4  | 243.9838 | 29942 | 146.0  | 6360  | 14.6  | 0.0081 |
| 5  | 244.1826 | 30092 | 289.6  | 12618 | 29.0  | 0.0081 |
| 6  | 249.1403 | 30243 | 620.8  | 27049 | 62.1  | 0.0082 |
| 7  | 266.1639 | 30599 | 371.6  | 16190 | 37.2  | 0.0087 |
| 8  | 376.1841 | 30985 | 139.1  | 6061  | 13.9  | 0.0121 |
| 9  | 443.2855 | 31743 | 224.3  | 9773  | 22.4  | 0.0140 |
| 10 | 444.2854 | 29321 | 132.7  | 5781  | 13.3  | 0.0152 |

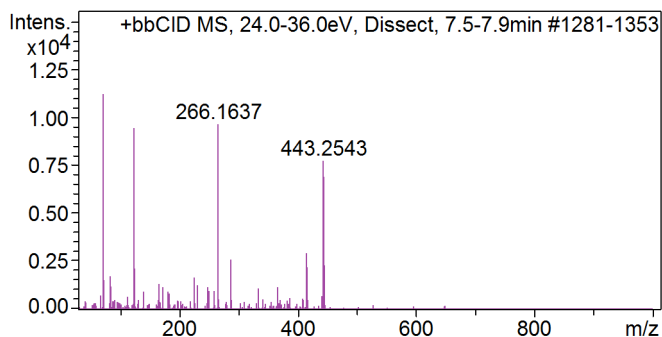

| #  | m/z      | Res.  | S/N   | I     | I %   | FWHM   |
|----|----------|-------|-------|-------|-------|--------|
| 1  | 72.0416  | 18854 | 999.2 | 11226 | 100.0 | 0.0038 |
| 2  | 123.0400 | 23067 | 839.8 | 9436  | 84.1  | 0.0053 |
| 3  | 266.1637 | 30790 | 857.1 | 9630  | 85.8  | 0.0086 |
| 4  | 443.1253 | 40756 | 336.0 | 3775  | 33.6  | 0.0109 |
| 5  | 443.1610 | 33774 | 544.0 | 6112  | 54.4  | 0.0131 |
| 6  | 443.2260 | 31662 | 663.7 | 7457  | 66.4  | 0.0140 |
| 7  | 443.2543 | 31740 | 687.6 | 7725  | 68.8  | 0.0140 |
| 8  | 444.1884 | 37858 | 332.6 | 3736  | 33.3  | 0.0117 |
| 9  | 444.2252 | 36962 | 614.6 | 6905  | 61.5  | 0.0120 |
| 10 | 444.2581 | 34246 | 327.2 | 3676  | 32.7  | 0.0130 |

## Cmpd 63, Dissect, 7.7 min

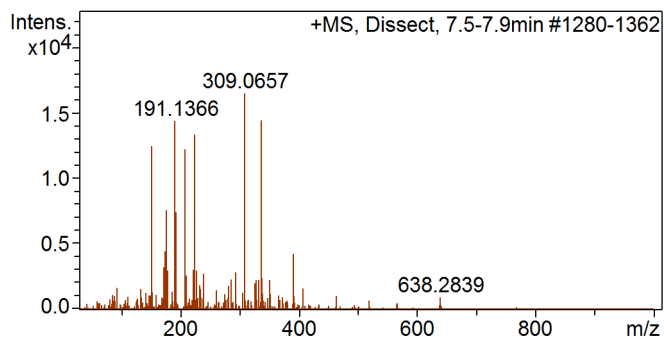

| #  | m/z      | Res.  | S/N   | I     | I %   | FWHM   |
|----|----------|-------|-------|-------|-------|--------|
| 1  | 151.1066 | 25591 | 756.1 | 12462 | 75.6  | 0.0059 |
| 2  | 175.1423 | 27279 | 270.7 | 4463  | 27.1  | 0.0064 |
| 3  | 177.0487 | 26602 | 458.4 | 7555  | 45.9  | 0.0067 |
| 4  | 191.1366 | 27847 | 870.0 | 14341 | 87.0  | 0.0069 |
| 5  | 193.1521 | 27778 | 449.4 | 7408  | 45.0  | 0.0070 |
| 6  | 209.1466 | 29037 | 740.8 | 12211 | 74.1  | 0.0072 |
| 7  | 225.1310 | 29693 | 808.9 | 13333 | 80.9  | 0.0076 |
| 8  | 309.0657 | 31961 | 999.6 | 16477 | 100.0 | 0.0097 |
| 9  | 337.0929 | 31331 | 874.7 | 14417 | 87.5  | 0.0108 |
| 10 | 391.0991 | 30154 | 258.4 | 4259  | 25.8  | 0.0130 |

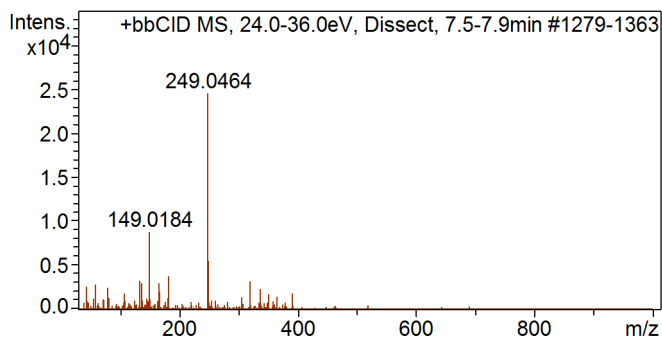

| #  | m/z      | Res.  | S/N   | I     | I %   | FWHM   |
|----|----------|-------|-------|-------|-------|--------|
| 1  | 133.0966 | 24520 | 134.3 | 3308  | 13.5  | 0.0054 |
| 2  | 136.0168 | 24983 | 120.8 | 2976  | 12.1  | 0.0054 |
| 3  | 149.0184 | 23966 | 356.4 | 8780  | 35.7  | 0.0062 |
| 4  | 149.0909 | 26640 | 264.0 | 6504  | 26.5  | 0.0056 |
| 5  | 166.0594 | 26288 | 121.8 | 3000  | 12.2  | 0.0063 |
| 6  | 183.0855 | 24943 | 155.3 | 3825  | 15.6  | 0.0073 |
| 7  | 249.0464 | 31189 | 997.6 | 24576 | 100.0 | 0.0080 |
| 8  | 250.0497 | 29976 | 225.4 | 5553  | 22.6  | 0.0083 |
| 9  | 250.1698 | 28788 | 116.8 | 2879  | 11.7  | 0.0087 |
| 10 | 320.0673 | 29762 | 130.1 | 3204  | 13.0  | 0.0108 |



# Compound Spectrum List Report

## Cmpd 64, Dissect, 7.7 min

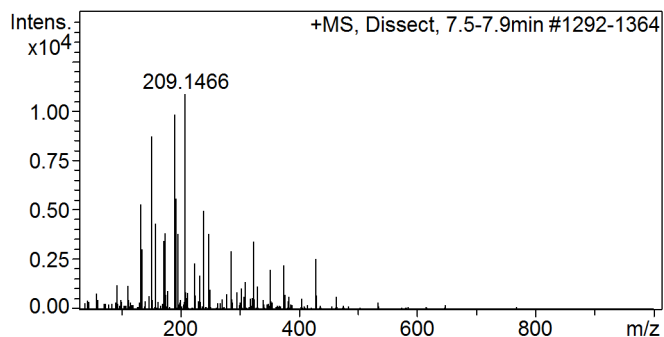

| #  | m/z      | Res.  | S/N   | I     | I %   | FWHM   |
|----|----------|-------|-------|-------|-------|--------|
| 1  | 133.0967 | 24467 | 486.9 | 5292  | 48.7  | 0.0054 |
| 2  | 151.1066 | 25725 | 801.2 | 8708  | 80.2  | 0.0059 |
| 3  | 158.1485 | 26392 | 397.4 | 4319  | 39.8  | 0.0060 |
| 4  | 175.1422 | 27516 | 355.0 | 3858  | 35.5  | 0.0064 |
| 5  | 191.1366 | 27919 | 901.2 | 9796  | 90.2  | 0.0068 |
| 6  | 193.1521 | 27807 | 512.9 | 5575  | 51.3  | 0.0069 |
| 7  | 197.0895 | 27977 | 349.9 | 3803  | 35.0  | 0.0070 |
| 8  | 209.1466 | 29260 | 999.3 | 10861 | 100.0 | 0.0071 |
| 9  | 240.1878 | 30646 | 456.4 | 4961  | 45.7  | 0.0078 |
| 10 | 249.1402 | 29162 | 350.3 | 3808  | 35.1  | 0.0085 |

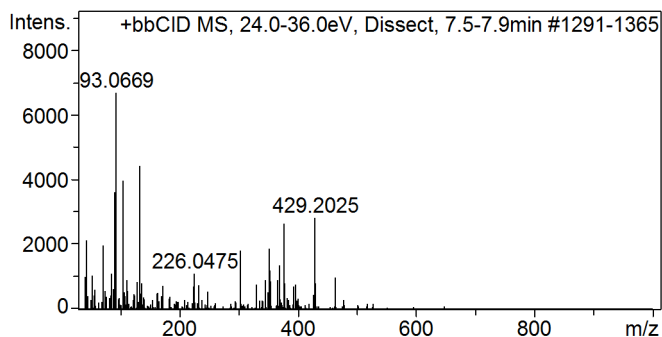

| #  | m/z      | Res.  | S/N   | I    | I %   | FWHM   |
|----|----------|-------|-------|------|-------|--------|
| 1  | 43.0160  | 15582 | 320.0 | 2140 | 32.0  | 0.0028 |
| 2  | 71.0466  | 18164 | 295.4 | 1976 | 29.5  | 0.0039 |
| 3  | 91.0513  | 20111 | 540.6 | 3615 | 54.1  | 0.0045 |
| 4  | 93.0669  | 19738 | 999.8 | 6686 | 100.0 | 0.0047 |
| 5  | 105.0664 | 21643 | 595.0 | 3979 | 59.5  | 0.0049 |
| 6  | 133.0966 | 24519 | 661.0 | 4420 | 66.1  | 0.0054 |
| 7  | 304.1779 | 30728 | 272.2 | 1820 | 27.2  | 0.0099 |
| 8  | 352.2336 | 31902 | 282.3 | 1888 | 28.2  | 0.0110 |
| 9  | 377.1801 | 30938 | 397.3 | 2657 | 39.7  | 0.0122 |
| 10 | 429.2025 | 30369 | 421.6 | 2820 | 42.2  | 0.0141 |

## Cmpd 65, Dissect, 7.8 min

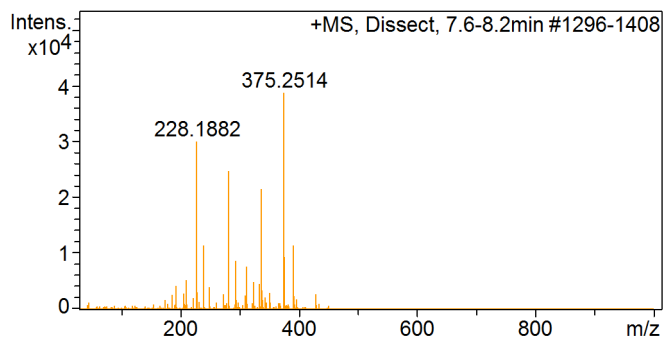

| #  | m/z      | Res.  | S/N   | I     | I %   | FWHM   |
|----|----------|-------|-------|-------|-------|--------|
| 1  | 211.1621 | 28776 | 137.4 | 5323  | 13.7  | 0.0073 |
| 2  | 228.1882 | 30599 | 773.2 | 29959 | 77.3  | 0.0075 |
| 3  | 240.1878 | 30816 | 296.5 | 11487 | 29.7  | 0.0078 |
| 4  | 282.1949 | 30532 | 637.9 | 24716 | 63.8  | 0.0092 |
| 5  | 294.2328 | 31190 | 224.3 | 8689  | 22.4  | 0.0094 |
| 6  | 312.2430 | 30677 | 199.4 | 7727  | 19.9  | 0.0102 |
| 7  | 337.0927 | 34247 | 556.8 | 21572 | 55.7  | 0.0098 |
| 8  | 375.2514 | 33113 | 999.8 | 38736 | 100.0 | 0.0113 |
| 9  | 376.2549 | 30554 | 242.0 | 9377  | 24.2  | 0.0123 |
| 10 | 391.0988 | 31748 | 297.5 | 11527 | 29.8  | 0.0123 |

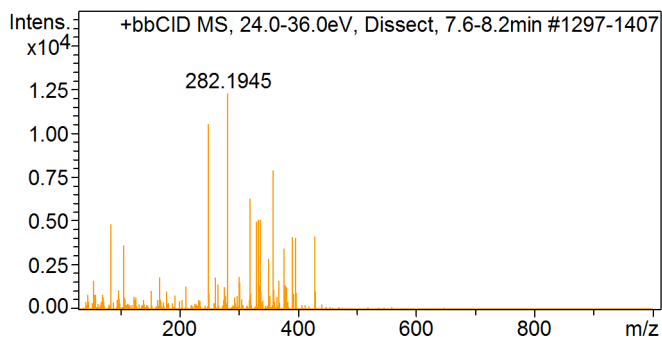

| #  | m/z      | Res.  | S/N   | I     | I %   | FWHM   |
|----|----------|-------|-------|-------|-------|--------|
| 1  | 84.0778  | 18979 | 392.9 | 4825  | 39.3  | 0.0044 |
| 2  | 250.1694 | 28669 | 853.6 | 10483 | 85.4  | 0.0087 |
| 3  | 282.1945 | 30665 | 999.7 | 12277 | 100.0 | 0.0092 |
| 4  | 320.0667 | 32507 | 513.4 | 6305  | 51.4  | 0.0098 |
| 5  | 331.2631 | 30646 | 404.7 | 4970  | 40.5  | 0.0108 |
| 6  | 334.2240 | 30483 | 415.1 | 5097  | 41.5  | 0.0110 |
| 7  | 337.0924 | 32768 | 415.4 | 5101  | 41.6  | 0.0103 |
| 8  | 359.0737 | 31986 | 642.6 | 7892  | 64.3  | 0.0112 |
| 9  | 391.0983 | 30171 | 334.6 | 4108  | 33.5  | 0.0130 |
| 10 | 429.2027 | 30446 | 339.5 | 4170  | 34.0  | 0.0141 |

# Compound Spectrum List Report

## Cmpd 66, Dissect, 8.0 min

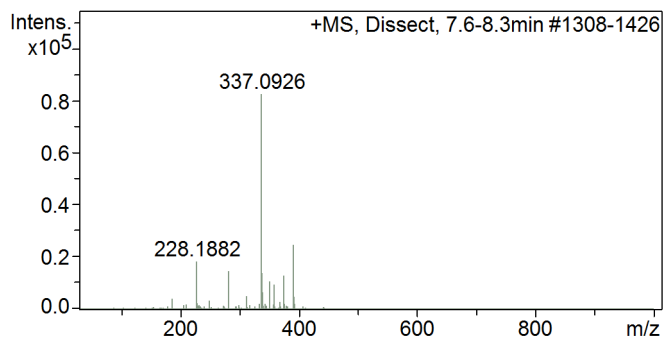

| #  | m/z      | Res.  | S/N   | I     | I %   | FWHM   |
|----|----------|-------|-------|-------|-------|--------|
| 1  | 228.1882 | 30199 | 224.1 | 18498 | 22.4  | 0.0076 |
| 2  | 282.1954 | 30215 | 178.9 | 14769 | 17.9  | 0.0093 |
| 3  | 312.2428 | 30362 | 64.0  | 5282  | 6.4   | 0.0103 |
| 4  | 337.0926 | 34356 | 999.9 | 82534 | 100.0 | 0.0098 |
| 5  | 338.0956 | 30352 | 171.2 | 14131 | 17.1  | 0.0111 |
| 6  | 339.0890 | 26270 | 80.8  | 6671  | 8.1   | 0.0129 |
| 7  | 351.1077 | 30864 | 130.8 | 10797 | 13.1  | 0.0114 |
| 8  | 359.0737 | 31589 | 116.4 | 9604  | 11.6  | 0.0114 |
| 9  | 375.2513 | 31971 | 159.0 | 13124 | 15.9  | 0.0117 |
| 10 | 391.0987 | 31809 | 301.6 | 24892 | 30.2  | 0.0123 |

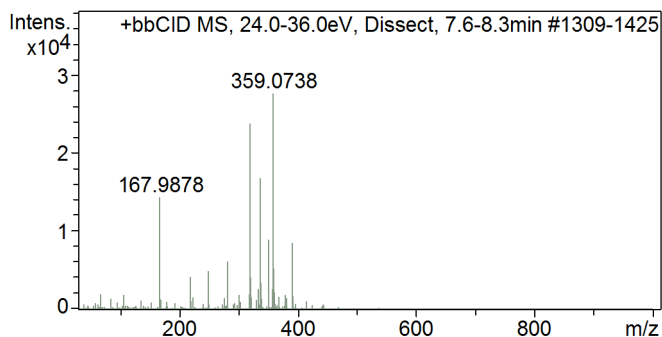

| #  | m/z      | Res.  | S/N   | I     | I %   | FWHM   |
|----|----------|-------|-------|-------|-------|--------|
| 1  | 167.9878 | 26988 | 518.8 | 14382 | 51.9  | 0.0062 |
| 2  | 219.1670 | 28654 | 153.0 | 4241  | 15.3  | 0.0076 |
| 3  | 250.1696 | 28598 | 178.5 | 4949  | 17.9  | 0.0087 |
| 4  | 282.1944 | 30644 | 221.4 | 6139  | 22.2  | 0.0092 |
| 5  | 320.0667 | 32908 | 857.4 | 23770 | 85.8  | 0.0097 |
| 6  | 337.0926 | 33673 | 605.8 | 16793 | 60.6  | 0.0100 |
| 7  | 351.1077 | 31416 | 321.8 | 8921  | 32.2  | 0.0112 |
| 8  | 359.0738 | 32377 | 999.6 | 27710 | 100.0 | 0.0111 |
| 9  | 360.0764 | 30606 | 191.3 | 5304  | 19.1  | 0.0118 |
| 10 | 391.0985 | 31272 | 309.1 | 8568  | 30.9  | 0.0125 |

## Cmpd 67, Dissect, 8.1 min

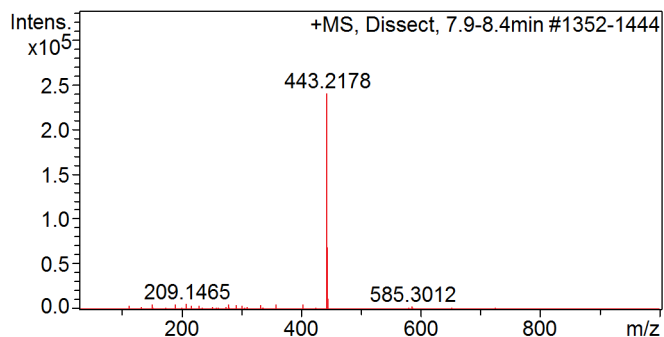

| #  | m/z      | Res.  | S/N   | I      | I %   | FWHM   |
|----|----------|-------|-------|--------|-------|--------|
| 1  | 151.0913 | 25501 | 22.1  | 5323   | 2.2   | 0.0059 |
| 2  | 191.1365 | 28444 | 20.8  | 5009   | 2.1   | 0.0067 |
| 3  | 209.1465 | 28377 | 24.1  | 5794   | 2.4   | 0.0074 |
| 4  | 279.1950 | 25019 | 20.8  | 5012   | 2.1   | 0.0112 |
| 5  | 292.2173 | 31355 | 19.8  | 4769   | 2.0   | 0.0093 |
| 6  | 359.0739 | 31423 | 22.8  | 5480   | 2.3   | 0.0114 |
| 7  | 403.1878 | 29796 | 20.7  | 4989   | 2.1   | 0.0135 |
| 8  | 443.2178 | 37827 | 999.9 | 240498 | 100.0 | 0.0117 |
| 9  | 444.2209 | 32269 | 288.2 | 69315  | 28.8  | 0.0138 |
| 10 | 445.2239 | 30653 | 52.5  | 12631  | 5.3   | 0.0145 |

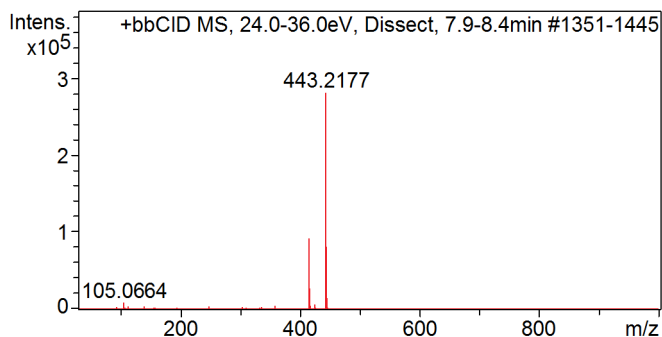

| #  | m/z      | Res.  | S/N   | I      | I %   | FWHM   |
|----|----------|-------|-------|--------|-------|--------|
| 1  | 105.0664 | 21611 | 30.6  | 8610   | 3.1   | 0.0049 |
| 2  | 138.9978 | 25230 | 14.4  | 4047   | 1.4   | 0.0055 |
| 3  | 359.0737 | 32023 | 17.7  | 4970   | 1.8   | 0.0112 |
| 4  | 415.1873 | 35336 | 328.6 | 92482  | 32.9  | 0.0117 |
| 5  | 416.1904 | 32056 | 98.2  | 27632  | 9.8   | 0.0130 |
| 6  | 417.1935 | 27495 | 14.8  | 4178   | 1.5   | 0.0152 |
| 7  | 425.1688 | 31028 | 23.2  | 6520   | 2.3   | 0.0137 |
| 8  | 443.2177 | 38301 | 997.9 | 280879 | 100.0 | 0.0116 |
| 9  | 444.2208 | 33715 | 290.6 | 81798  | 29.1  | 0.0132 |
| 10 | 445.2237 | 30308 | 54.2  | 15251  | 5.4   | 0.0147 |

# Compound Spectrum List Report

## Cmpd 68, Dissect, 8.1 min

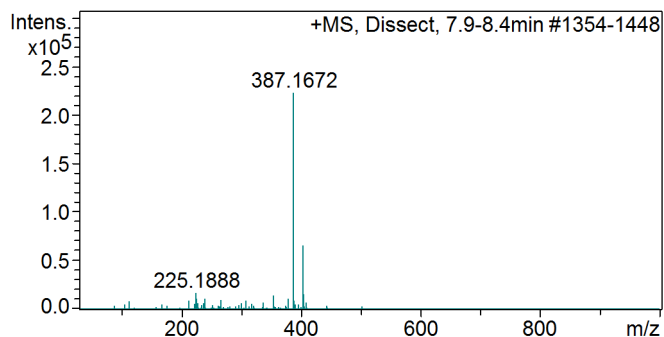

| #  | m/z      | Res.  | S/N   | I      | I %   | FWHM   |
|----|----------|-------|-------|--------|-------|--------|
| 1  | 225.1888 | 28309 | 77.4  | 17240  | 7.7   | 0.0080 |
| 2  | 226.1150 | 29076 | 51.4  | 11462  | 5.1   | 0.0078 |
| 3  | 240.0939 | 29356 | 51.5  | 11470  | 5.2   | 0.0082 |
| 4  | 267.1139 | 29407 | 45.7  | 10189  | 4.6   | 0.0091 |
| 5  | 354.2497 | 30080 | 66.2  | 14744  | 6.6   | 0.0118 |
| 6  | 379.0635 | 31128 | 51.5  | 11480  | 5.2   | 0.0122 |
| 7  | 387.1672 | 35403 | 999.3 | 222631 | 100.0 | 0.0109 |
| 8  | 388.1705 | 34252 | 247.3 | 55102  | 24.8  | 0.0113 |
| 9  | 404.1931 | 33681 | 296.8 | 66128  | 29.7  | 0.0120 |
| 10 | 405.1964 | 30616 | 70.8  | 15770  | 7.1   | 0.0132 |

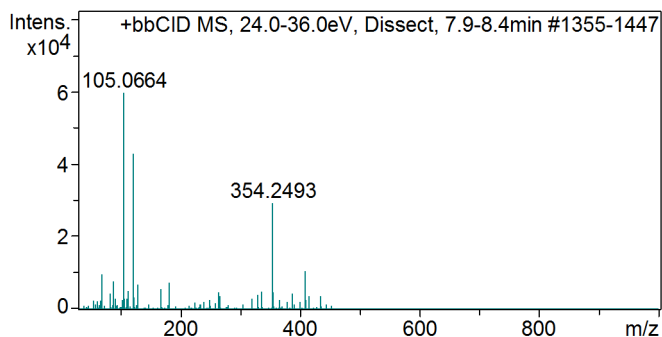

| #  | m/z      | Res.  | S/N   | I     | I %   | FWHM   |
|----|----------|-------|-------|-------|-------|--------|
| 1  | 69.0308  | 18088 | 162.8 | 9723  | 16.3  | 0.0038 |
| 2  | 88.0184  | 19424 | 130.5 | 7789  | 13.0  | 0.0045 |
| 3  | 105.0664 | 21627 | 999.8 | 59695 | 100.0 | 0.0049 |
| 4  | 121.0607 | 22884 | 717.5 | 42840 | 71.8  | 0.0053 |
| 5  | 121.0971 | 22709 | 112.7 | 6727  | 11.3  | 0.0053 |
| 6  | 129.0496 | 22199 | 115.4 | 6891  | 11.5  | 0.0058 |
| 7  | 167.9878 | 27153 | 97.2  | 5801  | 9.7   | 0.0062 |
| 8  | 182.0539 | 27730 | 126.3 | 7539  | 12.6  | 0.0066 |
| 9  | 354.2493 | 31567 | 490.8 | 29307 | 49.1  | 0.0112 |
| 10 | 409.1480 | 30913 | 177.5 | 10595 | 17.7  | 0.0132 |

## Cmpd 69, Dissect, 8.3 min

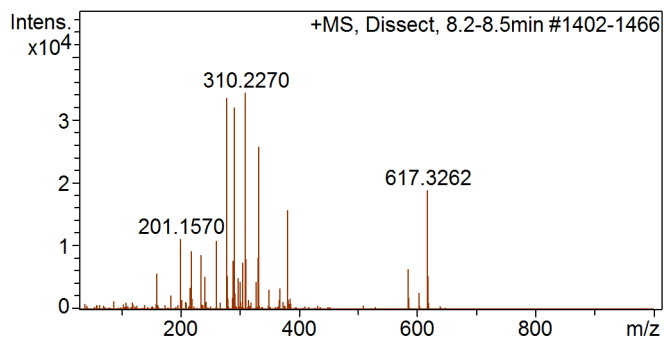

| #  | m/z      | Res.  | S/N   | I     | I %   | FWHM   |
|----|----------|-------|-------|-------|-------|--------|
| 1  | 201.1570 | 27888 | 326.8 | 11209 | 32.7  | 0.0072 |
| 2  | 219.1670 | 28200 | 269.1 | 9231  | 26.9  | 0.0078 |
| 3  | 236.1930 | 29650 | 253.3 | 8688  | 25.3  | 0.0080 |
| 4  | 262.1714 | 29963 | 317.8 | 10901 | 31.8  | 0.0087 |
| 5  | 279.1974 | 30924 | 975.8 | 33472 | 97.6  | 0.0090 |
| 6  | 292.2173 | 32273 | 930.6 | 31920 | 93.1  | 0.0091 |
| 7  | 310.2270 | 31659 | 999.5 | 34284 | 100.0 | 0.0098 |
| 8  | 333.2037 | 29424 | 749.3 | 25701 | 75.0  | 0.0113 |
| 9  | 382.0469 | 31106 | 457.6 | 15696 | 45.8  | 0.0123 |
| 10 | 617.3262 | 31474 | 548.9 | 18827 | 54.9  | 0.0196 |

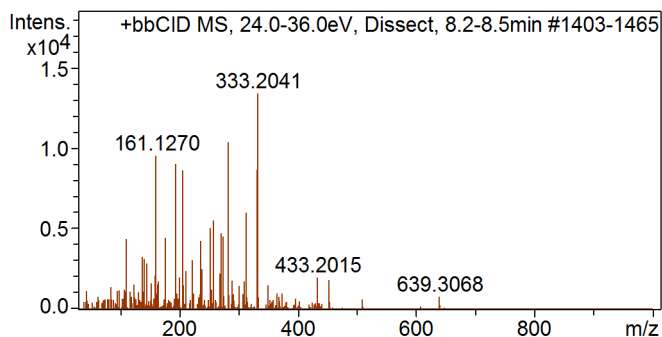

| #  | m/z      | Res.  | S/N   | I     | I %   | FWHM   |
|----|----------|-------|-------|-------|-------|--------|
| 1  | 161.1270 | 26616 | 709.9 | 9536  | 71.0  | 0.0061 |
| 2  | 195.0926 | 26206 | 671.3 | 9017  | 67.2  | 0.0074 |
| 3  | 207.0921 | 26017 | 642.9 | 8635  | 64.3  | 0.0080 |
| 4  | 253.1325 | 30102 | 377.2 | 5067  | 37.7  | 0.0084 |
| 5  | 258.1742 | 29374 | 413.8 | 5558  | 41.4  | 0.0088 |
| 6  | 271.1420 | 28602 | 352.5 | 4735  | 35.3  | 0.0095 |
| 7  | 283.1419 | 31321 | 772.9 | 10382 | 77.3  | 0.0090 |
| 8  | 313.1515 | 29310 | 446.7 | 6001  | 44.7  | 0.0107 |
| 9  | 332.2084 | 31742 | 644.4 | 8656  | 64.5  | 0.0105 |
| 10 | 333.2041 | 25559 | 999.6 | 13426 | 100.0 | 0.0130 |

# Compound Spectrum List Report

## Cmpd 70, Dissect, 8.4 min

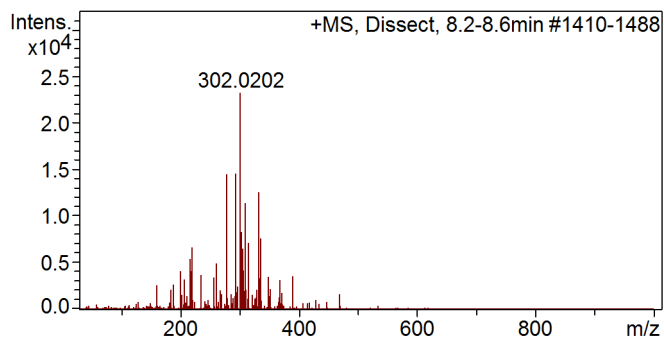

| #  | m/z      | Res.  | S/N   | I     | I %   | FWHM   |
|----|----------|-------|-------|-------|-------|--------|
| 1  | 221.1463 | 28817 | 288.1 | 6697  | 28.8  | 0.0077 |
| 2  | 279.1973 | 30283 | 621.9 | 14458 | 62.2  | 0.0092 |
| 3  | 294.2328 | 31808 | 626.7 | 14569 | 62.7  | 0.0093 |
| 4  | 302.0202 | 32273 | 999.0 | 23226 | 100.0 | 0.0094 |
| 5  | 304.0355 | 30020 | 356.5 | 8288  | 35.7  | 0.0101 |
| 6  | 306.0514 | 31388 | 280.6 | 6524  | 28.1  | 0.0098 |
| 7  | 310.2269 | 31257 | 489.4 | 11379 | 49.0  | 0.0099 |
| 8  | 315.2539 | 29236 | 307.5 | 7149  | 30.8  | 0.0108 |
| 9  | 333.2035 | 28448 | 539.1 | 12533 | 54.0  | 0.0117 |
| 10 | 336.2396 | 32235 | 327.7 | 7619  | 32.8  | 0.0104 |

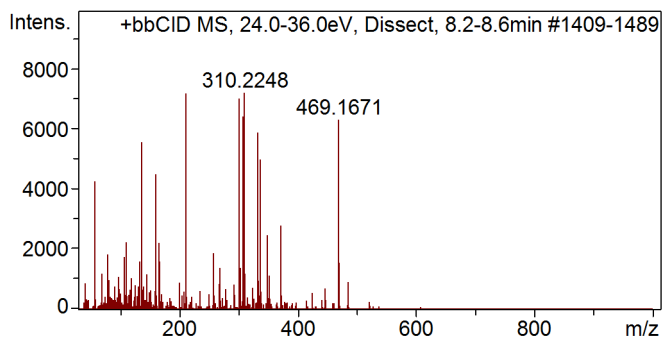

| #  | m/z      | Res.  | S/N   | I    | I %   | FWHM   |
|----|----------|-------|-------|------|-------|--------|
| 1  | 57.0676  | 17101 | 589.3 | 4238 | 59.0  | 0.0033 |
| 2  | 136.0471 | 25032 | 770.3 | 5539 | 77.1  | 0.0054 |
| 3  | 161.1270 | 26325 | 624.2 | 4489 | 62.5  | 0.0061 |
| 4  | 212.1938 | 28546 | 996.8 | 7168 | 99.7  | 0.0074 |
| 5  | 302.0203 | 30764 | 973.7 | 7002 | 97.4  | 0.0098 |
| 6  | 308.2098 | 27935 | 887.0 | 6379 | 88.8  | 0.0110 |
| 7  | 310.2248 | 30267 | 999.4 | 7187 | 100.0 | 0.0102 |
| 8  | 333.2039 | 25715 | 813.7 | 5851 | 81.4  | 0.0130 |
| 9  | 337.2411 | 26596 | 691.9 | 4975 | 69.2  | 0.0127 |
| 10 | 469.1671 | 32310 | 872.6 | 6275 | 87.3  | 0.0145 |

## Cmpd 71, Dissect, 8.5 min

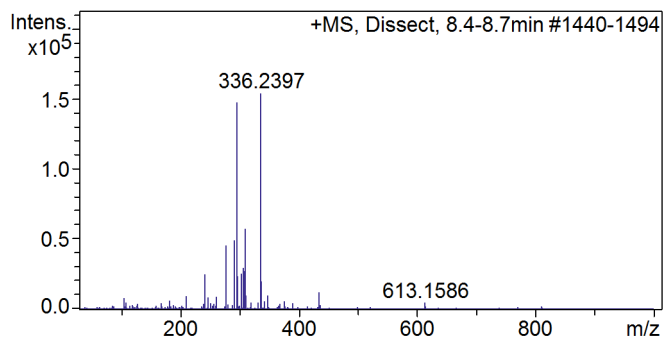

| #  | m/z      | Res.  | S/N   | I      | I %   | FWHM   |
|----|----------|-------|-------|--------|-------|--------|
| 1  | 242.2761 | 28275 | 165.0 | 25449  | 16.5  | 0.0086 |
| 2  | 278.2386 | 31250 | 297.7 | 45910  | 29.8  | 0.0089 |
| 3  | 292.2175 | 31464 | 319.1 | 49218  | 31.9  | 0.0093 |
| 4  | 296.2486 | 33394 | 956.4 | 147491 | 95.7  | 0.0089 |
| 5  | 297.2519 | 31621 | 153.5 | 23673  | 15.4  | 0.0094 |
| 6  | 304.0360 | 31299 | 167.1 | 25763  | 16.7  | 0.0097 |
| 7  | 307.2166 | 31979 | 193.2 | 29790  | 19.3  | 0.0096 |
| 8  | 308.2120 | 27040 | 177.6 | 27382  | 17.8  | 0.0114 |
| 9  | 310.2271 | 31019 | 372.1 | 57391  | 37.2  | 0.0100 |
| 10 | 336.2397 | 33340 | 999.3 | 154102 | 100.0 | 0.0101 |

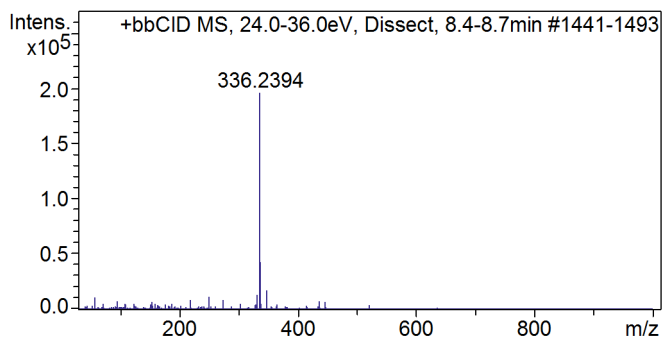

| #  | m/z      | Res.  | S/N   | I      | I %   | FWHM   |
|----|----------|-------|-------|--------|-------|--------|
| 1  | 57.0677  | 17027 | 56.5  | 11066  | 5.7   | 0.0034 |
| 2  | 95.0824  | 19937 | 37.4  | 7311   | 3.7   | 0.0048 |
| 3  | 219.1670 | 28677 | 44.2  | 8648   | 4.4   | 0.0076 |
| 4  | 251.1559 | 28813 | 61.3  | 11990  | 6.1   | 0.0087 |
| 5  | 275.1913 | 30691 | 43.0  | 8422   | 4.3   | 0.0090 |
| 6  | 332.2084 | 31791 | 68.1  | 13334  | 6.8   | 0.0104 |
| 7  | 336.2394 | 32903 | 999.9 | 195703 | 100.0 | 0.0102 |
| 8  | 337.2423 | 30164 | 221.2 | 43294  | 22.1  | 0.0112 |
| 9  | 348.2029 | 30560 | 88.8  | 17378  | 8.9   | 0.0114 |
| 10 | 437.1788 | 28780 | 35.4  | 6930   | 3.5   | 0.0152 |

# Compound Spectrum List Report

## Cmpd 72, Dissect, 8.6 min

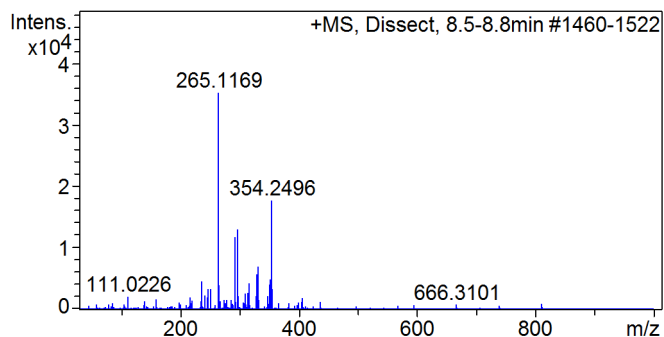

| #  | m/z      | Res.  | S/N   | I     | I %   | FWHM   |
|----|----------|-------|-------|-------|-------|--------|
| 1  | 237.0832 | 28501 | 130.3 | 4593  | 13.0  | 0.0083 |
| 2  | 265.0770 | 31190 | 389.7 | 13739 | 39.0  | 0.0085 |
| 3  | 265.1169 | 30548 | 999.7 | 35244 | 100.0 | 0.0087 |
| 4  | 293.0710 | 31717 | 334.4 | 11791 | 33.5  | 0.0092 |
| 5  | 297.1023 | 31772 | 370.5 | 13063 | 37.1  | 0.0094 |
| 6  | 297.2517 | 30525 | 167.5 | 5905  | 16.8  | 0.0097 |
| 7  | 330.2527 | 32832 | 162.2 | 5720  | 16.2  | 0.0101 |
| 8  | 332.2685 | 30770 | 199.4 | 7029  | 19.9  | 0.0108 |
| 9  | 352.2341 | 32472 | 138.7 | 4890  | 13.9  | 0.0108 |
| 10 | 354.2496 | 31046 | 503.6 | 17755 | 50.4  | 0.0114 |

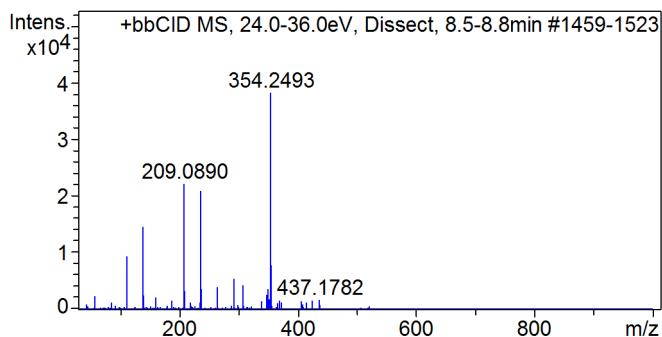

| #  | m/z      | Res.  | S/N   | I     | I %   | FWHM   |
|----|----------|-------|-------|-------|-------|--------|
| 1  | 111.0226 | 22530 | 246.6 | 9439  | 24.7  | 0.0049 |
| 2  | 139.0166 | 24470 | 379.7 | 14536 | 38.0  | 0.0057 |
| 3  | 209.0890 | 28787 | 579.4 | 22181 | 58.0  | 0.0073 |
| 4  | 237.0831 | 30127 | 545.4 | 20879 | 54.6  | 0.0079 |
| 5  | 238.0866 | 28880 | 96.7  | 3703  | 9.7   | 0.0082 |
| 6  | 265.0771 | 29081 | 103.4 | 3956  | 10.3  | 0.0091 |
| 7  | 293.0710 | 31224 | 143.5 | 5494  | 14.4  | 0.0094 |
| 8  | 308.2103 | 28319 | 113.8 | 4356  | 11.4  | 0.0109 |
| 9  | 354.2493 | 32136 | 998.6 | 38227 | 100.0 | 0.0110 |
| 10 | 355.2526 | 31156 | 205.7 | 7874  | 20.6  | 0.0114 |

## Cmpd 73, Dissect, 8.8 min

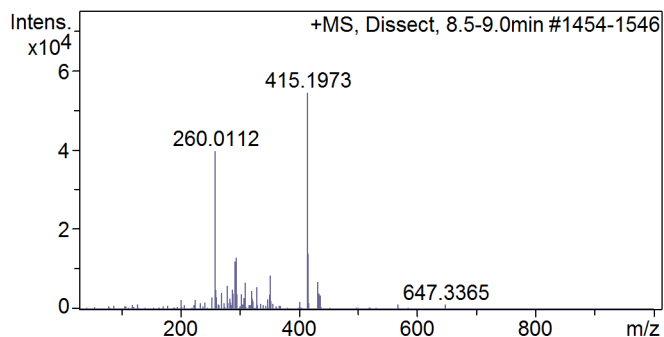

| #  | m/z      | Res.  | S/N   | I     | I %   | FWHM   |
|----|----------|-------|-------|-------|-------|--------|
| 1  | 260.0112 | 30982 | 729.1 | 39682 | 73.0  | 0.0084 |
| 2  | 280.2179 | 29147 | 109.9 | 5981  | 11.0  | 0.0096 |
| 3  | 293.0710 | 31102 | 222.9 | 12131 | 22.3  | 0.0094 |
| 4  | 295.0836 | 30092 | 239.1 | 13014 | 23.9  | 0.0098 |
| 5  | 310.2261 | 31256 | 125.5 | 6829  | 12.6  | 0.0099 |
| 6  | 330.2527 | 31963 | 105.3 | 5732  | 10.5  | 0.0103 |
| 7  | 352.2341 | 32501 | 157.1 | 8550  | 15.7  | 0.0108 |
| 8  | 415.1973 | 33470 | 998.7 | 54352 | 100.0 | 0.0124 |
| 9  | 416.2006 | 31103 | 256.3 | 13951 | 25.7  | 0.0134 |
| 10 | 432.2231 | 30573 | 127.6 | 6944  | 12.8  | 0.0141 |

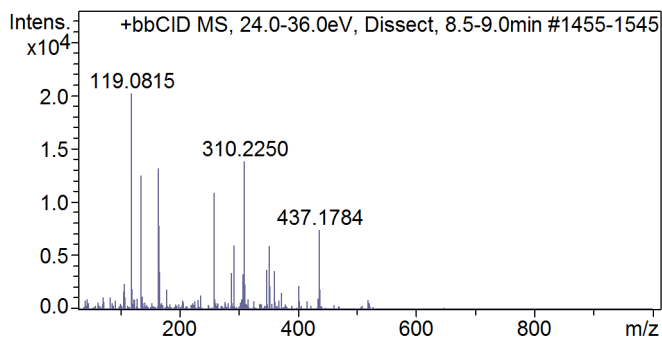

| #  | m/z      | Res.  | S/N   | I     | I %   | FWHM   |
|----|----------|-------|-------|-------|-------|--------|
| 1  | 119.0565 | 22024 | 332.6 | 6722  | 33.3  | 0.0054 |
| 2  | 119.0815 | 23155 | 999.6 | 20204 | 100.0 | 0.0051 |
| 3  | 135.0759 | 24413 | 617.4 | 12480 | 61.8  | 0.0055 |
| 4  | 165.9723 | 26970 | 649.6 | 13130 | 65.0  | 0.0062 |
| 5  | 166.9798 | 24725 | 387.0 | 7821  | 38.7  | 0.0068 |
| 6  | 260.0112 | 30471 | 537.3 | 10859 | 53.7  | 0.0085 |
| 7  | 293.0710 | 31745 | 297.1 | 6004  | 29.7  | 0.0092 |
| 8  | 310.2250 | 30674 | 683.7 | 13818 | 68.4  | 0.0101 |
| 9  | 352.2338 | 33160 | 294.5 | 5953  | 29.5  | 0.0106 |
| 10 | 437.1784 | 30365 | 368.4 | 7446  | 36.9  | 0.0144 |

# Compound Spectrum List Report

## Cmpd 74, Dissect, 8.9 min

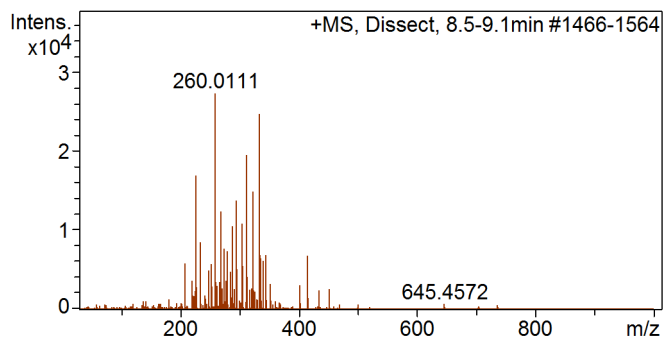

| #  | m/z      | Res.  | S/N   | I     | I %   | FWHM   |
|----|----------|-------|-------|-------|-------|--------|
| 1  | 227.1563 | 28159 | 619.1 | 16926 | 61.9  | 0.0081 |
| 2  | 260.0111 | 30327 | 999.5 | 27329 | 100.0 | 0.0086 |
| 3  | 269.1083 | 30612 | 453.8 | 12408 | 45.4  | 0.0088 |
| 4  | 288.2800 | 30663 | 385.2 | 10531 | 38.5  | 0.0094 |
| 5  | 295.0836 | 30602 | 504.5 | 13793 | 50.5  | 0.0096 |
| 6  | 295.2360 | 30458 | 445.6 | 12184 | 44.6  | 0.0097 |
| 7  | 305.2007 | 30050 | 395.5 | 10812 | 39.6  | 0.0102 |
| 8  | 312.2430 | 31852 | 712.1 | 19469 | 71.2  | 0.0098 |
| 9  | 323.2110 | 31179 | 543.5 | 14861 | 54.4  | 0.0104 |
| 10 | 334.2241 | 32963 | 901.5 | 24650 | 90.2  | 0.0101 |

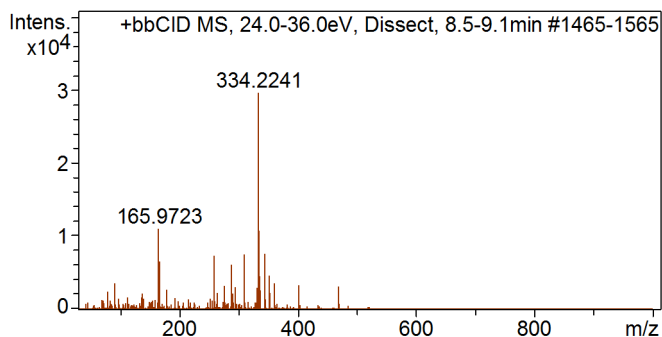

| #  | m/z      | Res.  | S/N   | I     | I %   | FWHM   |
|----|----------|-------|-------|-------|-------|--------|
| 1  | 165.9723 | 26477 | 373.0 | 11065 | 37.3  | 0.0063 |
| 2  | 166.9798 | 24886 | 196.9 | 5841  | 19.7  | 0.0067 |
| 3  | 167.9879 | 26651 | 223.0 | 6616  | 22.3  | 0.0063 |
| 4  | 260.0112 | 29909 | 249.6 | 7406  | 25.0  | 0.0087 |
| 5  | 288.2801 | 29863 | 208.2 | 6176  | 20.8  | 0.0097 |
| 6  | 310.2251 | 29986 | 255.6 | 7584  | 25.6  | 0.0103 |
| 7  | 334.2241 | 34257 | 998.9 | 29636 | 100.0 | 0.0098 |
| 8  | 335.2272 | 31549 | 363.3 | 10778 | 36.4  | 0.0106 |
| 9  | 345.1921 | 31382 | 256.6 | 7613  | 25.7  | 0.0110 |
| 10 | 352.2339 | 32258 | 158.8 | 4712  | 15.9  | 0.0109 |

## Cmpd 75, Dissect, 9.0 min

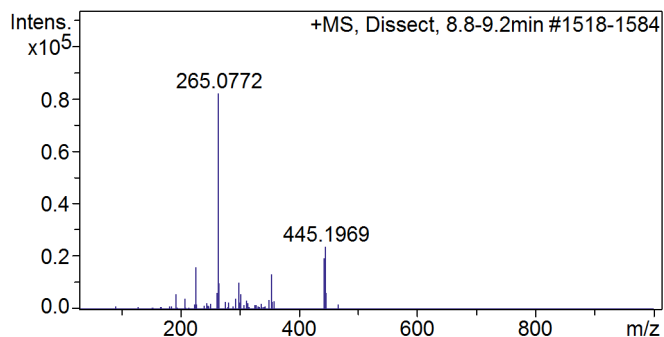

| #  | m/z      | Res.  | S/N   | I     | I %   | FWHM   |
|----|----------|-------|-------|-------|-------|--------|
| 1  | 227.1563 | 28171 | 195.1 | 16018 | 19.5  | 0.0081 |
| 2  | 263.1918 | 30872 | 79.3  | 6507  | 7.9   | 0.0085 |
| 3  | 265.0772 | 32193 | 999.9 | 82073 | 100.0 | 0.0082 |
| 4  | 266.0804 | 30465 | 121.5 | 9976  | 12.2  | 0.0087 |
| 5  | 300.0048 | 31718 | 125.7 | 10319 | 12.6  | 0.0095 |
| 6  | 354.2505 | 29915 | 164.4 | 13494 | 16.4  | 0.0118 |
| 7  | 443.2177 | 31587 | 237.1 | 19461 | 23.7  | 0.0140 |
| 8  | 444.2206 | 30903 | 78.7  | 6463  | 7.9   | 0.0144 |
| 9  | 445.1969 | 32106 | 291.7 | 23944 | 29.2  | 0.0139 |
| 10 | 446.2000 | 29550 | 77.3  | 6347  | 7.7   | 0.0151 |

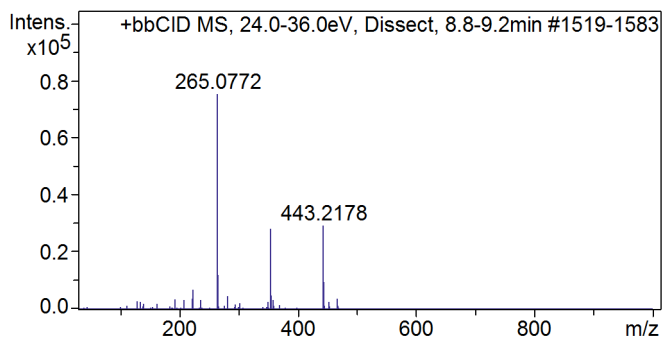

| #  | m/z      | Res.  | S/N   | I     | I %   | FWHM   |
|----|----------|-------|-------|-------|-------|--------|
| 1  | 223.0679 | 28444 | 51.2  | 3868  | 5.1   | 0.0078 |
| 2  | 224.0996 | 28484 | 94.0  | 7097  | 9.4   | 0.0079 |
| 3  | 265.0772 | 32399 | 998.5 | 75369 | 100.0 | 0.0082 |
| 4  | 266.0807 | 30602 | 159.8 | 12064 | 16.0  | 0.0087 |
| 5  | 282.1944 | 30059 | 62.4  | 4711  | 6.3   | 0.0094 |
| 6  | 354.2494 | 31400 | 374.1 | 28234 | 37.5  | 0.0113 |
| 7  | 355.2526 | 30235 | 65.8  | 4965  | 6.6   | 0.0117 |
| 8  | 443.2178 | 32810 | 389.6 | 29411 | 39.0  | 0.0135 |
| 9  | 444.2209 | 30684 | 128.4 | 9695  | 12.9  | 0.0145 |
| 10 | 467.1783 | 30559 | 52.6  | 3974  | 5.3   | 0.0153 |

# Compound Spectrum List Report

## Cmpd 76, Dissect, 9.1 min

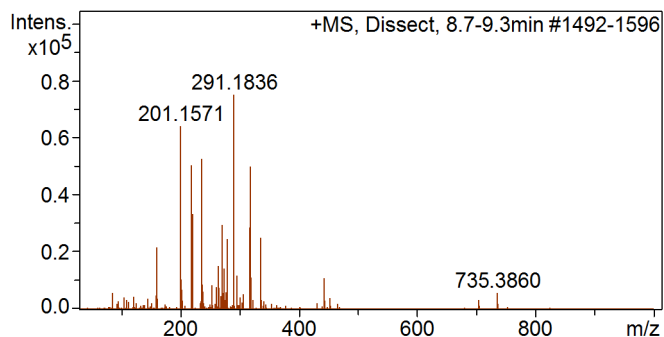

| #  | m/z      | Res.  | S/N   | I     | I %   | FWHM   |
|----|----------|-------|-------|-------|-------|--------|
| 1  | 201.1571 | 29080 | 849.2 | 63853 | 85.0  | 0.0069 |
| 2  | 219.1671 | 29091 | 668.3 | 50250 | 66.9  | 0.0075 |
| 3  | 221.1826 | 28463 | 444.4 | 33414 | 44.5  | 0.0078 |
| 4  | 237.1771 | 30971 | 700.1 | 52642 | 70.1  | 0.0077 |
| 5  | 271.1240 | 29603 | 392.4 | 29503 | 39.3  | 0.0092 |
| 6  | 280.1604 | 29849 | 327.9 | 24659 | 32.8  | 0.0094 |
| 7  | 291.1836 | 31968 | 999.2 | 75133 | 100.0 | 0.0091 |
| 8  | 318.2898 | 32594 | 381.4 | 28678 | 38.2  | 0.0098 |
| 9  | 319.2162 | 32496 | 663.4 | 49884 | 66.4  | 0.0098 |
| 10 | 336.2402 | 31795 | 333.3 | 25062 | 33.4  | 0.0106 |

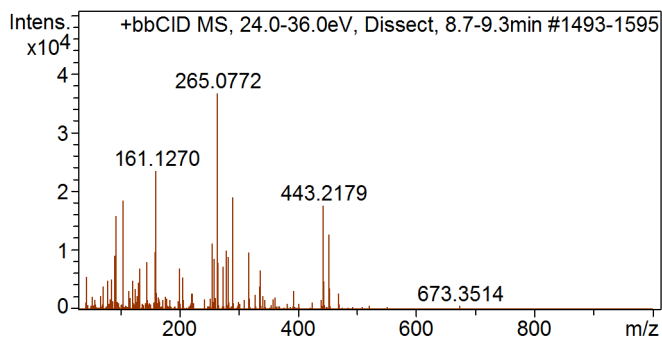

| #  | m/z      | Res.  | S/N   | I     | I %   | FWHM   |
|----|----------|-------|-------|-------|-------|--------|
| 1  | 93.0668  | 19829 | 431.4 | 15847 | 43.1  | 0.0047 |
| 2  | 105.0664 | 21609 | 503.5 | 18496 | 50.4  | 0.0049 |
| 3  | 159.1114 | 26658 | 267.5 | 9827  | 26.8  | 0.0060 |
| 4  | 161.1270 | 26637 | 639.7 | 23497 | 64.0  | 0.0060 |
| 5  | 256.2550 | 30133 | 306.8 | 11270 | 30.7  | 0.0085 |
| 6  | 265.0772 | 32157 | 999.8 | 36727 | 100.0 | 0.0082 |
| 7  | 280.1603 | 30289 | 273.6 | 10050 | 27.4  | 0.0092 |
| 8  | 291.1837 | 30725 | 517.8 | 19022 | 51.8  | 0.0095 |
| 9  | 443.2179 | 33183 | 480.1 | 17635 | 48.0  | 0.0134 |
| 10 | 453.1729 | 31454 | 346.5 | 12727 | 34.7  | 0.0144 |

## Cmpd 77, Dissect, 9.3 min

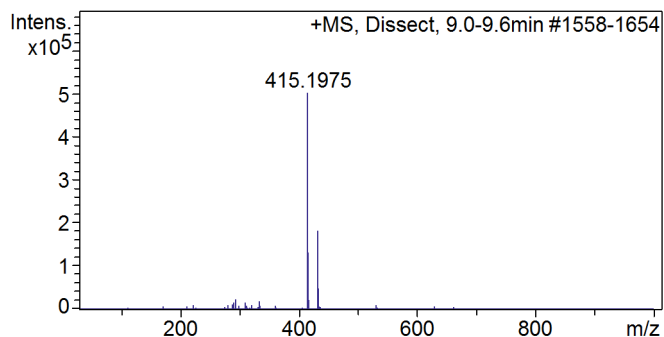

| #  | m/z      | Res.  | S/N   | I      | I %   | FWHM   |
|----|----------|-------|-------|--------|-------|--------|
| 1  | 288.2802 | 30090 | 21.0  | 10530  | 2.1   | 0.0096 |
| 2  | 291.0557 | 31650 | 31.2  | 15671  | 3.1   | 0.0092 |
| 3  | 294.2331 | 32312 | 49.6  | 24924  | 5.0   | 0.0091 |
| 4  | 310.2275 | 31018 | 29.7  | 14909  | 3.0   | 0.0100 |
| 5  | 334.2242 | 32496 | 37.1  | 18652  | 3.7   | 0.0103 |
| 6  | 415.1975 | 38246 | 999.5 | 502132 | 100.0 | 0.0109 |
| 7  | 416.2010 | 33786 | 265.2 | 133238 | 26.5  | 0.0123 |
| 8  | 417.2036 | 29875 | 43.4  | 21788  | 4.3   | 0.0140 |
| 9  | 432.2236 | 34758 | 365.0 | 183371 | 36.5  | 0.0124 |
| 10 | 433.2267 | 31956 | 97.4  | 48919  | 9.7   | 0.0136 |

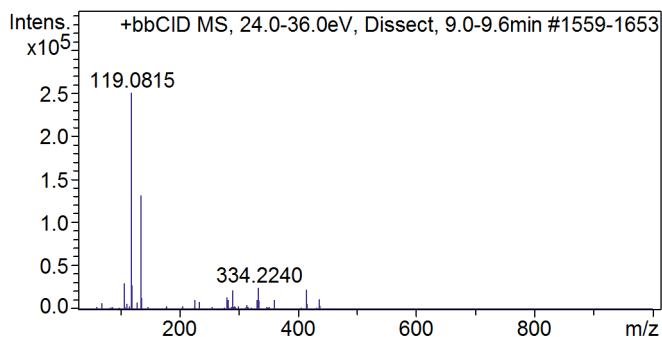

| #  | m/z      | Res.  | S/N   | I      | I %   | FWHM   |
|----|----------|-------|-------|--------|-------|--------|
| 1  | 107.0820 | 22053 | 123.5 | 30955  | 12.4  | 0.0049 |
| 2  | 119.0565 | 22013 | 59.1  | 14828  | 5.9   | 0.0054 |
| 3  | 119.0815 | 23955 | 999.0 | 250454 | 100.0 | 0.0050 |
| 4  | 120.0849 | 23159 | 114.2 | 28639  | 11.4  | 0.0052 |
| 5  | 135.0759 | 25279 | 524.1 | 131408 | 52.5  | 0.0053 |
| 6  | 136.0793 | 24082 | 54.5  | 13672  | 5.5   | 0.0057 |
| 7  | 281.1290 | 31727 | 56.4  | 14142  | 5.6   | 0.0089 |
| 8  | 291.0555 | 31733 | 89.8  | 22523  | 9.0   | 0.0092 |
| 9  | 334.2240 | 33593 | 102.1 | 25595  | 10.2  | 0.0099 |
| 10 | 415.1973 | 32213 | 92.5  | 23185  | 9.3   | 0.0129 |

# Compound Spectrum List Report

## Cmpd 78, Dissect, 9.4 min

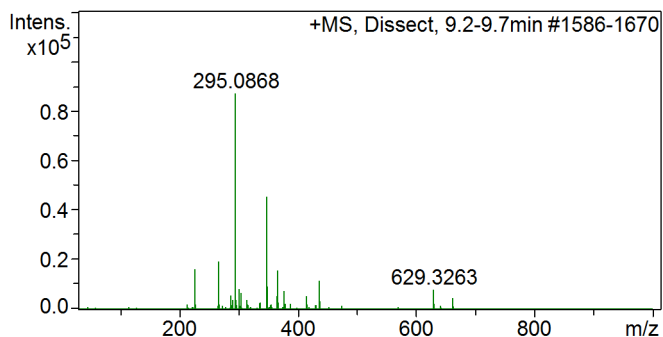

| #  | m/z      | Res.  | S/N    | I     | I %   | FWHM   |
|----|----------|-------|--------|-------|-------|--------|
| 1  | 227.0562 | 28921 | 186.3  | 16258 | 18.6  | 0.0079 |
| 2  | 267.0928 | 31243 | 222.3  | 19395 | 22.2  | 0.0085 |
| 3  | 295.0868 | 32728 | 1000.0 | 87259 | 100.0 | 0.0090 |
| 4  | 302.0205 | 31266 | 94.7   | 8262  | 9.5   | 0.0097 |
| 5  | 348.0971 | 31927 | 520.0  | 45376 | 52.0  | 0.0109 |
| 6  | 349.1001 | 29943 | 106.9  | 9328  | 10.7  | 0.0117 |
| 7  | 366.1069 | 31375 | 181.4  | 15829 | 18.1  | 0.0117 |
| 8  | 377.0229 | 31637 | 86.3   | 7529  | 8.6   | 0.0119 |
| 9  | 437.1785 | 31875 | 133.4  | 11641 | 13.3  | 0.0137 |
| 10 | 629.3263 | 32705 | 93.2   | 8129  | 9.3   | 0.0192 |

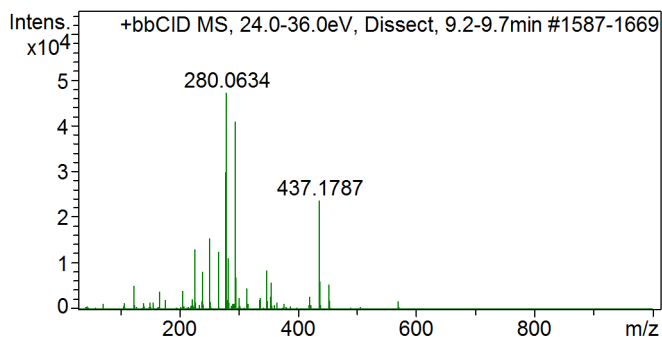

| #  | m/z      | Res.  | S/N   | I     | I %   | FWHM   |
|----|----------|-------|-------|-------|-------|--------|
| 1  | 227.0563 | 29571 | 278.1 | 13130 | 27.8  | 0.0077 |
| 2  | 240.2242 | 30502 | 175.3 | 8275  | 17.5  | 0.0079 |
| 3  | 252.0698 | 30155 | 327.0 | 15439 | 32.7  | 0.0084 |
| 4  | 267.0928 | 31183 | 266.3 | 12572 | 26.7  | 0.0086 |
| 5  | 279.0560 | 31523 | 630.5 | 29768 | 63.1  | 0.0089 |
| 6  | 280.0634 | 31228 | 999.0 | 47164 | 100.0 | 0.0090 |
| 7  | 283.1421 | 31493 | 237.5 | 11214 | 23.8  | 0.0090 |
| 8  | 295.0867 | 33021 | 863.5 | 40769 | 86.4  | 0.0089 |
| 9  | 348.0971 | 31672 | 181.1 | 8553  | 18.1  | 0.0110 |
| 10 | 437.1787 | 32952 | 503.6 | 23776 | 50.4  | 0.0133 |

## Cmpd 79, Dissect, 9.5 min

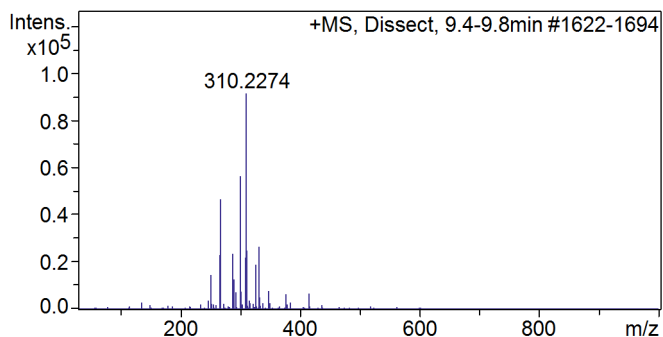

| #  | m/z      | Res.  | S/N   | I     | I %   | FWHM   |
|----|----------|-------|-------|-------|-------|--------|
| 1  | 252.2239 | 30988 | 159.6 | 14661 | 16.0  | 0.0081 |
| 2  | 267.0929 | 31155 | 252.1 | 23158 | 25.3  | 0.0086 |
| 3  | 268.2183 | 32345 | 506.3 | 46508 | 50.8  | 0.0083 |
| 4  | 288.2802 | 31535 | 256.1 | 23524 | 25.7  | 0.0091 |
| 5  | 301.1335 | 33008 | 612.9 | 56303 | 61.4  | 0.0091 |
| 6  | 309.0988 | 32986 | 239.8 | 22033 | 24.0  | 0.0094 |
| 7  | 310.2274 | 31912 | 997.4 | 91626 | 100.0 | 0.0097 |
| 8  | 311.2308 | 31735 | 271.0 | 24900 | 27.2  | 0.0098 |
| 9  | 327.0754 | 30799 | 208.3 | 19140 | 20.9  | 0.0106 |
| 10 | 332.2086 | 32346 | 290.6 | 26700 | 29.1  | 0.0103 |

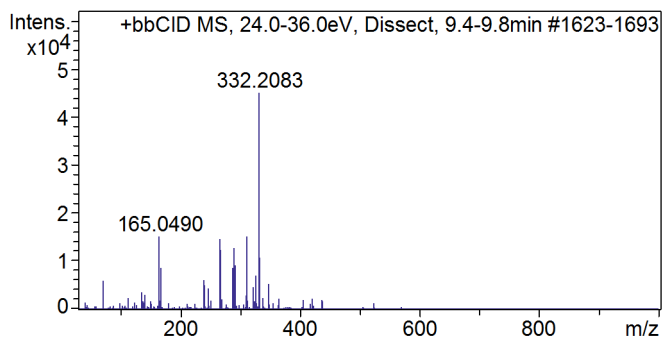

| #  | m/z      | Res.  | S/N   | I     | I %   | FWHM   |
|----|----------|-------|-------|-------|-------|--------|
| 1  | 165.0490 | 26555 | 338.6 | 15253 | 33.9  | 0.0062 |
| 2  | 167.9879 | 27102 | 193.4 | 8712  | 19.3  | 0.0062 |
| 3  | 267.0927 | 31840 | 326.0 | 14684 | 32.6  | 0.0084 |
| 4  | 268.0636 | 28879 | 276.9 | 12476 | 27.7  | 0.0093 |
| 5  | 288.2801 | 31560 | 192.8 | 8684  | 19.3  | 0.0091 |
| 6  | 290.1994 | 31367 | 284.5 | 12816 | 28.5  | 0.0093 |
| 7  | 292.2152 | 32195 | 206.4 | 9297  | 20.6  | 0.0091 |
| 8  | 312.0523 | 31592 | 337.9 | 15224 | 33.8  | 0.0099 |
| 9  | 332.2083 | 33953 | 999.6 | 45030 | 100.0 | 0.0098 |
| 10 | 333.2115 | 31498 | 239.8 | 10804 | 24.0  | 0.0106 |



# Compound Spectrum List Report

## Cmpd 80, Dissect, 9.7 min

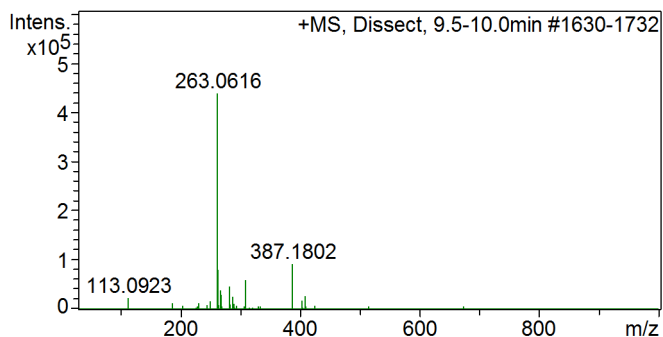

| #  | m/z      | Res.  | S/N   | I      | I %   | FWHM   |
|----|----------|-------|-------|--------|-------|--------|
| 1  | 113.0923 | 22498 | 53.7  | 23660  | 5.4   | 0.0050 |
| 2  | 263.0616 | 34504 | 996.5 | 439220 | 100.0 | 0.0076 |
| 3  | 264.0650 | 31655 | 182.8 | 80584  | 18.3  | 0.0083 |
| 4  | 268.2184 | 32456 | 88.8  | 39139  | 8.9   | 0.0083 |
| 5  | 269.1923 | 31256 | 70.4  | 31045  | 7.1   | 0.0086 |
| 6  | 283.1236 | 31757 | 107.2 | 47232  | 10.8  | 0.0089 |
| 7  | 288.2801 | 31365 | 59.2  | 26074  | 5.9   | 0.0092 |
| 8  | 309.0988 | 32587 | 137.7 | 60680  | 13.8  | 0.0095 |
| 9  | 387.1802 | 33362 | 211.7 | 93306  | 21.2  | 0.0116 |
| 10 | 409.1612 | 31654 | 63.4  | 27929  | 6.4   | 0.0129 |

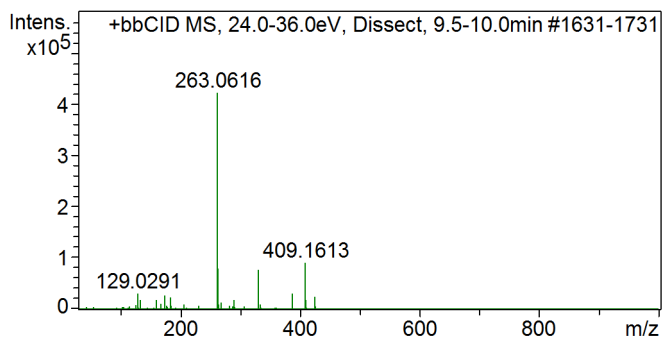

| #  | m/z      | Res.  | S/N   | I      | I %   | FWHM   |
|----|----------|-------|-------|--------|-------|--------|
| 1  | 129.0291 | 24382 | 74.5  | 31500  | 7.5   | 0.0053 |
| 2  | 175.0096 | 28427 | 65.6  | 27708  | 6.6   | 0.0062 |
| 3  | 184.0933 | 27447 | 57.7  | 24397  | 5.8   | 0.0067 |
| 4  | 263.0616 | 34349 | 999.0 | 422223 | 100.0 | 0.0077 |
| 5  | 264.0650 | 31727 | 190.1 | 80331  | 19.0  | 0.0083 |
| 6  | 290.1995 | 31742 | 46.2  | 19506  | 4.6   | 0.0091 |
| 7  | 331.1197 | 34218 | 183.3 | 77493  | 18.4  | 0.0097 |
| 8  | 387.1802 | 32290 | 74.8  | 31602  | 7.5   | 0.0120 |
| 9  | 409.1613 | 35113 | 215.8 | 91211  | 21.6  | 0.0117 |
| 10 | 425.1346 | 32564 | 59.6  | 25190  | 6.0   | 0.0131 |

## Cmpd 81, Dissect, 9.8 min

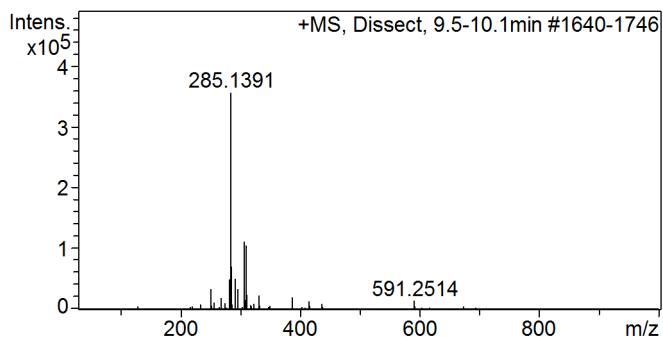

| #  | m/z      | Res.  | S/N   | I      | I %   | FWHM   |
|----|----------|-------|-------|--------|-------|--------|
| 1  | 252.2239 | 31250 | 95.6  | 34064  | 9.6   | 0.0081 |
| 2  | 283.1236 | 31723 | 140.6 | 50090  | 14.1  | 0.0089 |
| 3  | 285.1391 | 34088 | 999.5 | 356149 | 100.0 | 0.0084 |
| 4  | 286.1425 | 31734 | 198.8 | 70847  | 19.9  | 0.0090 |
| 5  | 292.2162 | 30469 | 144.0 | 51324  | 14.4  | 0.0096 |
| 6  | 297.1022 | 31792 | 95.4  | 34000  | 9.5   | 0.0093 |
| 7  | 307.1204 | 33071 | 313.3 | 111636 | 31.3  | 0.0093 |
| 8  | 310.2274 | 31997 | 296.0 | 105473 | 29.6  | 0.0097 |
| 9  | 311.2307 | 31432 | 69.5  | 24763  | 7.0   | 0.0099 |
| 10 | 332.2085 | 32074 | 64.8  | 23096  | 6.5   | 0.0104 |

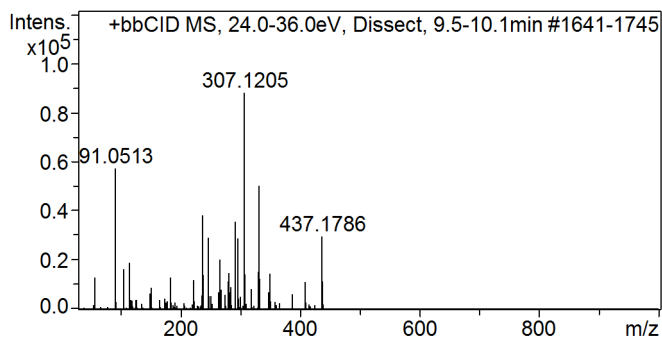

| #  | m/z      | Res.  | S/N   | I     | I %   | FWHM   |
|----|----------|-------|-------|-------|-------|--------|
| 1  | 91.0513  | 20411 | 648.8 | 57206 | 64.9  | 0.0045 |
| 2  | 115.0503 | 22779 | 217.2 | 19152 | 21.7  | 0.0051 |
| 3  | 238.0909 | 29942 | 434.0 | 38266 | 43.4  | 0.0080 |
| 4  | 247.1975 | 31074 | 332.1 | 29279 | 33.2  | 0.0080 |
| 5  | 267.1292 | 30966 | 229.9 | 20273 | 23.0  | 0.0086 |
| 6  | 292.2153 | 32597 | 404.6 | 35679 | 40.5  | 0.0090 |
| 7  | 297.1024 | 31652 | 328.0 | 28920 | 32.8  | 0.0094 |
| 8  | 307.1205 | 34117 | 999.3 | 88109 | 100.0 | 0.0090 |
| 9  | 332.2085 | 33870 | 569.4 | 50206 | 57.0  | 0.0098 |
| 10 | 437.1786 | 33694 | 336.5 | 29673 | 33.7  | 0.0130 |

# Compound Spectrum List Report

## Cmpd 82, Dissect, 9.9 min

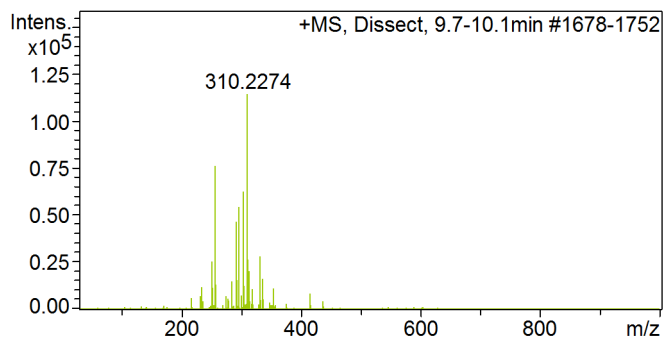

| #  | m/z      | Res.  | S/N   | I      | I %   | FWHM   |
|----|----------|-------|-------|--------|-------|--------|
| 1  | 252.2239 | 31530 | 223.0 | 25514  | 22.3  | 0.0080 |
| 2  | 257.1087 | 31333 | 664.5 | 76015  | 66.5  | 0.0082 |
| 3  | 292.2162 | 30526 | 406.5 | 46496  | 40.7  | 0.0096 |
| 4  | 297.1024 | 32405 | 475.8 | 54425  | 47.6  | 0.0092 |
| 5  | 304.2899 | 31631 | 548.3 | 62718  | 54.8  | 0.0096 |
| 6  | 310.2274 | 31434 | 999.8 | 114375 | 100.0 | 0.0099 |
| 7  | 311.2306 | 30516 | 232.7 | 26623  | 23.3  | 0.0102 |
| 8  | 314.2586 | 32980 | 179.1 | 20485  | 17.9  | 0.0095 |
| 9  | 332.2085 | 32168 | 247.2 | 28279  | 24.7  | 0.0103 |
| 10 | 336.2397 | 33445 | 144.7 | 16556  | 14.5  | 0.0101 |

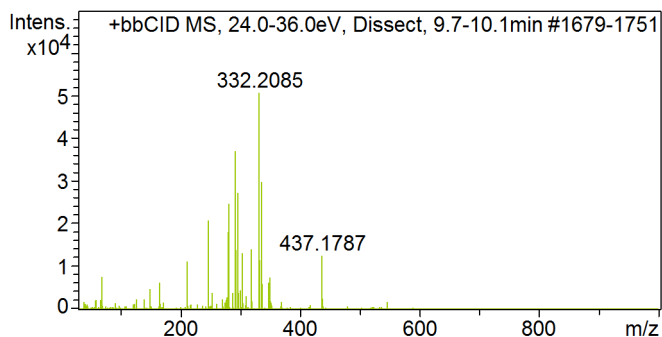

| #  | m/z      | Res.  | S/N   | I     | I %   | FWHM   |
|----|----------|-------|-------|-------|-------|--------|
| 1  | 247.1975 | 30572 | 411.3 | 20845 | 41.1  | 0.0081 |
| 2  | 281.0717 | 30849 | 357.6 | 18125 | 35.8  | 0.0091 |
| 3  | 282.0788 | 29270 | 488.7 | 24769 | 48.9  | 0.0096 |
| 4  | 292.2152 | 33114 | 728.2 | 36909 | 72.8  | 0.0088 |
| 5  | 293.0713 | 33027 | 274.6 | 13916 | 27.5  | 0.0089 |
| 6  | 297.1023 | 31457 | 538.1 | 27273 | 53.8  | 0.0094 |
| 7  | 304.2897 | 31471 | 260.3 | 13193 | 26.0  | 0.0097 |
| 8  | 319.0835 | 30770 | 279.6 | 14172 | 28.0  | 0.0104 |
| 9  | 332.2085 | 33928 | 999.8 | 50674 | 100.0 | 0.0098 |
| 10 | 336.2396 | 34091 | 588.7 | 29839 | 58.9  | 0.0099 |

## Cmpd 83, Dissect, 10.0 min

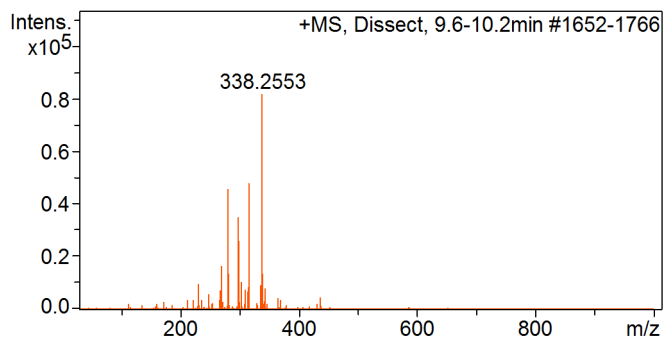

| #  | m/z      | Res.  | S/N   | I     | I %   | FWHM   |
|----|----------|-------|-------|-------|-------|--------|
| 1  | 270.2338 | 30847 | 202.5 | 16568 | 20.3  | 0.0088 |
| 2  | 281.1060 | 29132 | 557.6 | 45607 | 55.8  | 0.0096 |
| 3  | 281.1289 | 27714 | 171.8 | 14049 | 17.2  | 0.0101 |
| 4  | 281.2381 | 28222 | 230.4 | 18849 | 23.1  | 0.0100 |
| 5  | 281.2576 | 29232 | 283.4 | 23179 | 28.4  | 0.0096 |
| 6  | 298.2642 | 31696 | 429.6 | 35138 | 43.0  | 0.0094 |
| 7  | 299.1180 | 31020 | 318.1 | 26020 | 31.8  | 0.0096 |
| 8  | 316.2742 | 32266 | 586.3 | 47955 | 58.7  | 0.0098 |
| 9  | 338.2553 | 33765 | 999.2 | 81733 | 100.0 | 0.0100 |
| 10 | 339.2585 | 29764 | 168.0 | 13745 | 16.8  | 0.0114 |

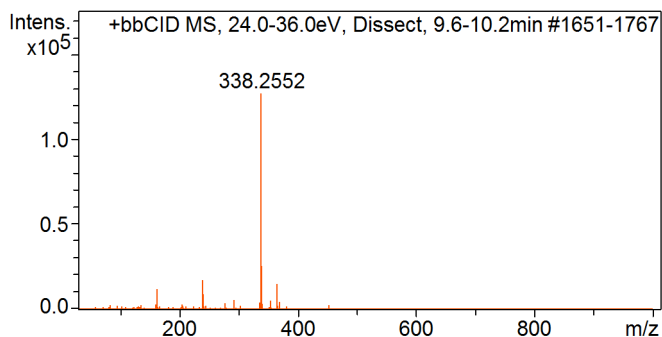

| #  | m/z      | Res.  | S/N   | I      | I %   | FWHM   |
|----|----------|-------|-------|--------|-------|--------|
| 1  | 163.0334 | 26242 | 95.7  | 12167  | 9.6   | 0.0062 |
| 2  | 240.1021 | 25436 | 75.5  | 9600   | 7.6   | 0.0094 |
| 3  | 240.2241 | 29970 | 135.8 | 17276  | 13.6  | 0.0080 |
| 4  | 241.1154 | 23748 | 54.9  | 6985   | 5.5   | 0.0102 |
| 5  | 241.1516 | 25678 | 71.9  | 9150   | 7.2   | 0.0094 |
| 6  | 241.1869 | 24698 | 56.3  | 7167   | 5.6   | 0.0098 |
| 7  | 293.0713 | 33952 | 43.7  | 5556   | 4.4   | 0.0086 |
| 8  | 338.2552 | 34607 | 998.0 | 126947 | 100.0 | 0.0098 |
| 9  | 339.2586 | 30629 | 201.9 | 25680  | 20.2  | 0.0111 |
| 10 | 365.0935 | 30930 | 120.3 | 15307  | 12.1  | 0.0118 |

# Compound Spectrum List Report

## Cmpd 84, Dissect, 10.1 min

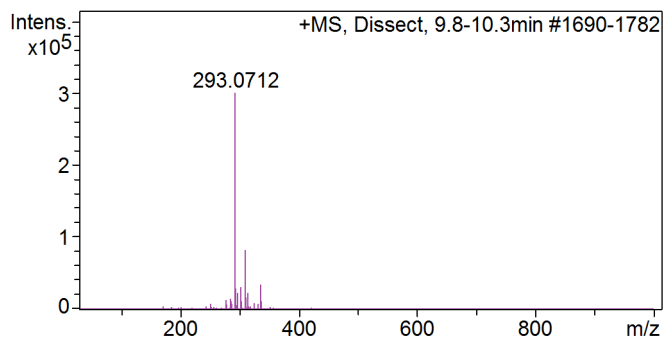

| #  | m/z      | Res.  | S/N   | I      | I %   | FWHM   |
|----|----------|-------|-------|--------|-------|--------|
| 1  | 285.1389 | 29098 | 52.9  | 15926  | 5.3   | 0.0098 |
| 2  | 293.0712 | 34460 | 999.0 | 300678 | 100.0 | 0.0085 |
| 3  | 294.0746 | 32519 | 99.5  | 29938  | 10.0  | 0.0090 |
| 4  | 297.2520 | 31280 | 76.8  | 23108  | 7.7   | 0.0095 |
| 5  | 303.1280 | 32209 | 105.9 | 31875  | 10.6  | 0.0094 |
| 6  | 310.0253 | 31707 | 274.2 | 82533  | 27.4  | 0.0098 |
| 7  | 310.2275 | 30310 | 88.4  | 26600  | 8.8   | 0.0102 |
| 8  | 311.0283 | 29529 | 57.5  | 17293  | 5.8   | 0.0105 |
| 9  | 314.2586 | 33728 | 79.2  | 23837  | 7.9   | 0.0093 |
| 10 | 336.2397 | 33765 | 115.1 | 34637  | 11.5  | 0.0100 |

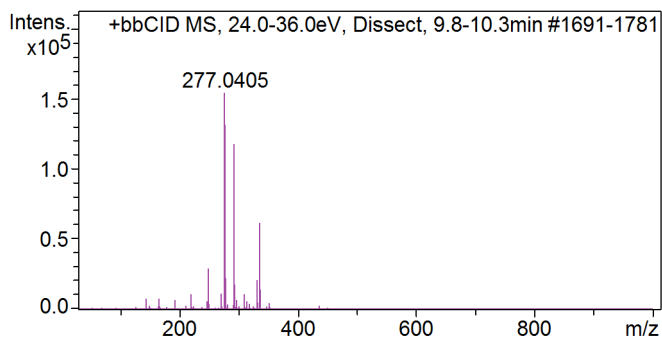

| #  | m/z      | Res.  | S/N    | I      | I %   | FWHM   |
|----|----------|-------|--------|--------|-------|--------|
| 1  | 250.0543 | 30754 | 188.9  | 29153  | 18.9  | 0.0081 |
| 2  | 271.1239 | 30874 | 75.3   | 11620  | 7.5   | 0.0088 |
| 3  | 277.0405 | 33902 | 1000.0 | 154297 | 100.0 | 0.0082 |
| 4  | 278.0477 | 31278 | 850.1  | 131165 | 85.0  | 0.0089 |
| 5  | 279.0512 | 29528 | 146.6  | 22616  | 14.7  | 0.0095 |
| 6  | 293.0713 | 34057 | 761.3  | 117472 | 76.1  | 0.0086 |
| 7  | 294.0746 | 31794 | 117.2  | 18077  | 11.7  | 0.0092 |
| 8  | 332.2085 | 31735 | 138.0  | 21297  | 13.8  | 0.0105 |
| 9  | 336.2396 | 34094 | 400.9  | 61858  | 40.1  | 0.0099 |
| 10 | 337.2430 | 32035 | 94.1   | 14515  | 9.4   | 0.0105 |

## Cmpd 85, Dissect, 10.2 min

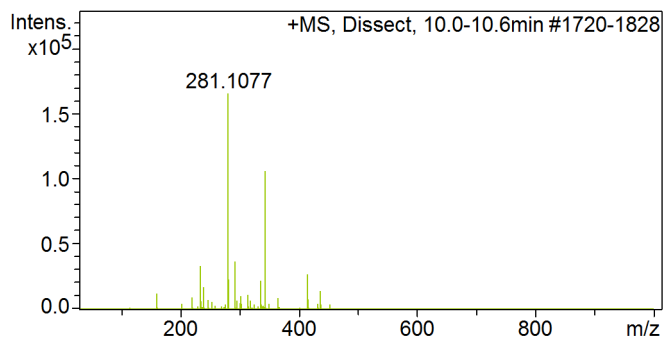

| #  | m/z      | Res.  | S/N   | I      | I %   | FWHM   |
|----|----------|-------|-------|--------|-------|--------|
| 1  | 235.1614 | 29878 | 201.5 | 33429  | 20.2  | 0.0079 |
| 2  | 240.2239 | 30298 | 103.9 | 17226  | 10.4  | 0.0079 |
| 3  | 281.1077 | 35054 | 998.3 | 165573 | 100.0 | 0.0080 |
| 4  | 282.1111 | 32014 | 140.6 | 23326  | 14.1  | 0.0088 |
| 5  | 293.0712 | 33691 | 224.2 | 37183  | 22.5  | 0.0087 |
| 6  | 336.2397 | 33183 | 135.1 | 22409  | 13.5  | 0.0101 |
| 7  | 343.2839 | 34166 | 638.6 | 105919 | 64.0  | 0.0100 |
| 8  | 344.2872 | 31654 | 94.9  | 15738  | 9.5   | 0.0109 |
| 9  | 415.1973 | 32642 | 163.6 | 27141  | 16.4  | 0.0127 |
| 10 | 437.1785 | 32002 | 86.0  | 14265  | 8.6   | 0.0137 |

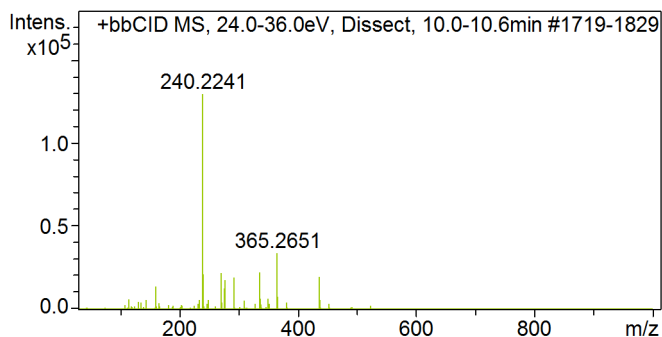

| #  | m/z      | Res.  | S/N   | I      | I %   | FWHM   |
|----|----------|-------|-------|--------|-------|--------|
| 1  | 161.0542 | 26657 | 108.8 | 14135  | 10.9  | 0.0060 |
| 2  | 240.2241 | 32088 | 997.9 | 129670 | 100.0 | 0.0075 |
| 3  | 241.2275 | 30784 | 163.5 | 21251  | 16.4  | 0.0078 |
| 4  | 271.1239 | 30973 | 171.0 | 22222  | 17.1  | 0.0088 |
| 5  | 277.0403 | 33424 | 99.5  | 12928  | 10.0  | 0.0083 |
| 6  | 278.0476 | 31093 | 138.1 | 17951  | 13.8  | 0.0089 |
| 7  | 293.0711 | 33906 | 149.8 | 19465  | 15.0  | 0.0086 |
| 8  | 336.2395 | 33822 | 173.3 | 22523  | 17.4  | 0.0099 |
| 9  | 365.2651 | 33487 | 262.6 | 34120  | 26.3  | 0.0109 |
| 10 | 437.1785 | 33862 | 152.9 | 19863  | 15.3  | 0.0129 |

# Compound Spectrum List Report

## Cmpd 86, Dissect, 10.3 min

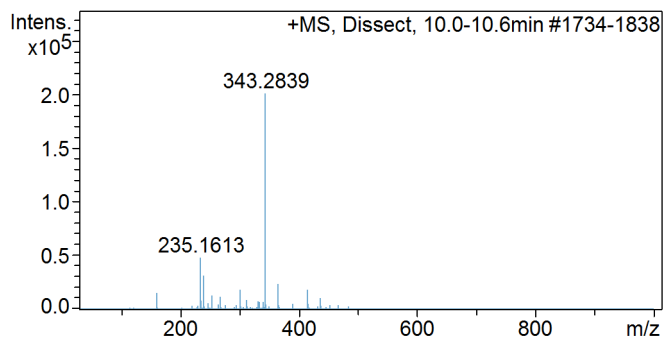

| #  | m/z      | Res.  | S/N   | I      | I %   | FWHM   |
|----|----------|-------|-------|--------|-------|--------|
| 1  | 161.0540 | 25759 | 79.4  | 16028  | 8.0   | 0.0063 |
| 2  | 235.1613 | 29694 | 241.3 | 48692  | 24.2  | 0.0079 |
| 3  | 240.2241 | 30598 | 158.3 | 31943  | 15.9  | 0.0079 |
| 4  | 254.2393 | 30083 | 65.2  | 13164  | 6.5   | 0.0085 |
| 5  | 268.2182 | 30544 | 60.3  | 12170  | 6.0   | 0.0088 |
| 6  | 301.2750 | 30102 | 93.6  | 18891  | 9.4   | 0.0100 |
| 7  | 343.2839 | 34335 | 998.2 | 201469 | 100.0 | 0.0100 |
| 8  | 344.2872 | 31571 | 195.8 | 39507  | 19.6  | 0.0109 |
| 9  | 365.2650 | 30826 | 118.2 | 23854  | 11.8  | 0.0118 |
| 10 | 415.1972 | 32050 | 93.4  | 18850  | 9.4   | 0.0130 |

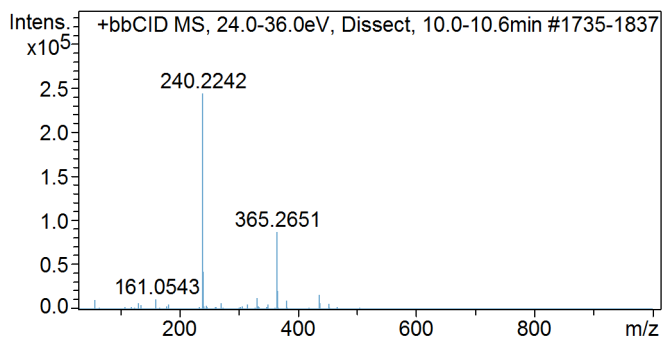

| #  | m/z      | Res.  | S/N   | I      | I %   | FWHM   |
|----|----------|-------|-------|--------|-------|--------|
| 1  | 57.0676  | 17229 | 41.7  | 10229  | 4.2   | 0.0033 |
| 2  | 161.0543 | 26769 | 48.6  | 11928  | 4.9   | 0.0060 |
| 3  | 240.2242 | 32145 | 994.7 | 244256 | 100.0 | 0.0075 |
| 4  | 241.2275 | 30910 | 175.2 | 43011  | 17.6  | 0.0078 |
| 5  | 332.2083 | 31315 | 52.9  | 12984  | 5.3   | 0.0106 |
| 6  | 365.0930 | 32407 | 40.0  | 9833   | 4.0   | 0.0113 |
| 7  | 365.2651 | 33812 | 358.1 | 87931  | 36.0  | 0.0108 |
| 8  | 366.2683 | 30689 | 87.9  | 21591  | 8.8   | 0.0119 |
| 9  | 381.2382 | 28997 | 39.8  | 9783   | 4.0   | 0.0131 |
| 10 | 437.1786 | 33337 | 69.7  | 17106  | 7.0   | 0.0131 |

## Cmpd 87, Dissect, 10.3 min

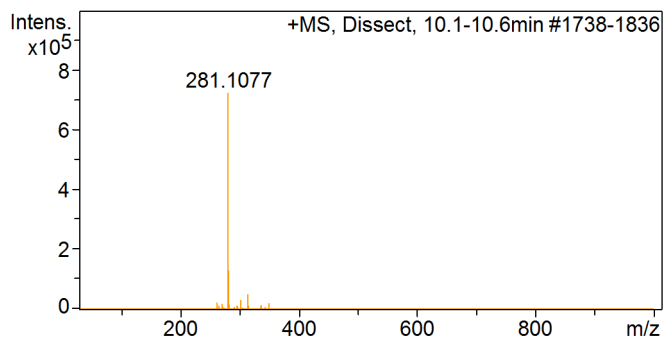

| #  | m/z      | Res.  | S/N   | I      | I %   | FWHM   |
|----|----------|-------|-------|--------|-------|--------|
| 1  | 263.0979 | 29791 | 29.5  | 21360  | 3.0   | 0.0088 |
| 2  | 271.1239 | 29622 | 25.3  | 18347  | 2.5   | 0.0092 |
| 3  | 281.1077 | 36153 | 998.1 | 722559 | 100.0 | 0.0078 |
| 4  | 282.1112 | 32957 | 181.7 | 131535 | 18.2  | 0.0086 |
| 5  | 282.2334 | 30623 | 39.6  | 28683  | 4.0   | 0.0092 |
| 6  | 283.1142 | 27947 | 22.3  | 16155  | 2.2   | 0.0101 |
| 7  | 303.0891 | 30757 | 45.5  | 32922  | 4.6   | 0.0099 |
| 8  | 314.2585 | 33253 | 70.9  | 51310  | 7.1   | 0.0095 |
| 9  | 337.2430 | 31225 | 18.2  | 13196  | 1.8   | 0.0108 |
| 10 | 350.2184 | 31876 | 27.7  | 20020  | 2.8   | 0.0110 |

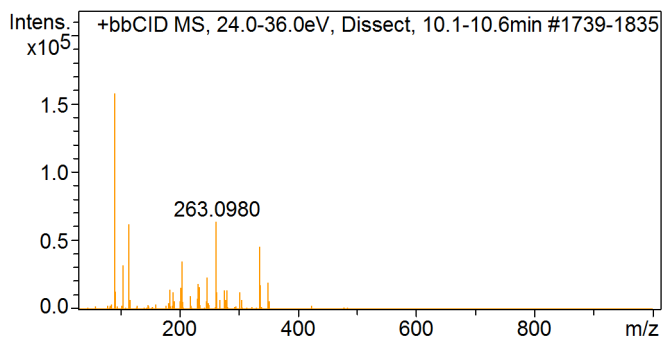

| #  | m/z      | Res.  | S/N   | I      | I %   | FWHM   |
|----|----------|-------|-------|--------|-------|--------|
| 1  | 91.0512  | 20936 | 999.6 | 157732 | 100.0 | 0.0043 |
| 2  | 105.0664 | 21728 | 206.4 | 32576  | 20.7  | 0.0048 |
| 3  | 115.0504 | 23034 | 393.7 | 62120  | 39.4  | 0.0050 |
| 4  | 205.0941 | 27893 | 223.8 | 35308  | 22.4  | 0.0074 |
| 5  | 232.0804 | 28890 | 119.1 | 18787  | 11.9  | 0.0080 |
| 6  | 248.0748 | 28612 | 148.4 | 23419  | 14.8  | 0.0087 |
| 7  | 263.0980 | 32147 | 405.9 | 64042  | 40.6  | 0.0082 |
| 8  | 336.2396 | 33731 | 289.3 | 45657  | 28.9  | 0.0100 |
| 9  | 337.2428 | 30978 | 115.0 | 18151  | 11.5  | 0.0109 |
| 10 | 350.2185 | 32572 | 124.3 | 19607  | 12.4  | 0.0108 |

# Compound Spectrum List Report

## Cmpd 88, Dissect, 10.4 min

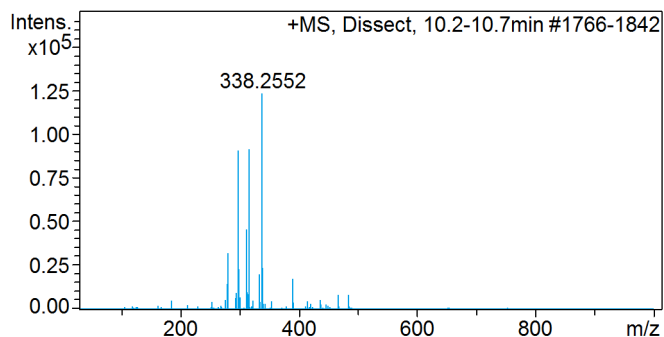

| #  | m/z      | Res.  | S/N   | I      | I %   | FWHM   |
|----|----------|-------|-------|--------|-------|--------|
| 1  | 281.1078 | 35871 | 260.9 | 32268  | 26.1  | 0.0078 |
| 2  | 298.2641 | 32886 | 733.2 | 90677  | 73.4  | 0.0091 |
| 3  | 299.2673 | 30051 | 186.5 | 23062  | 18.7  | 0.0100 |
| 4  | 312.2429 | 32143 | 370.6 | 45835  | 37.1  | 0.0097 |
| 5  | 316.2742 | 33443 | 738.4 | 91313  | 73.9  | 0.0095 |
| 6  | 317.2774 | 30641 | 146.5 | 18120  | 14.7  | 0.0104 |
| 7  | 334.2242 | 31225 | 162.3 | 20067  | 16.2  | 0.0107 |
| 8  | 338.2552 | 34534 | 999.0 | 123545 | 100.0 | 0.0098 |
| 9  | 339.2585 | 30571 | 194.4 | 24042  | 19.5  | 0.0111 |
| 10 | 390.2871 | 30508 | 142.0 | 17560  | 14.2  | 0.0128 |

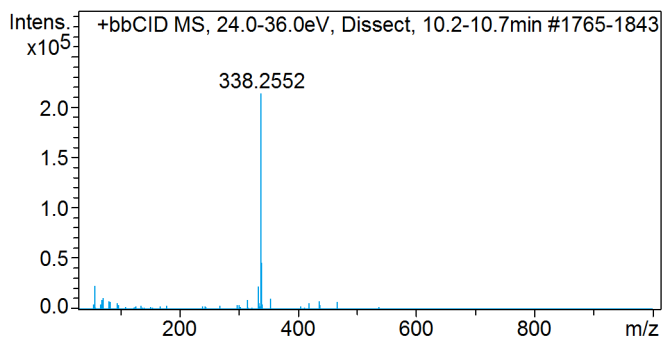

| #  | m/z      | Res.  | S/N   | I      | I %   | FWHM   |
|----|----------|-------|-------|--------|-------|--------|
| 1  | 57.0676  | 17255 | 109.8 | 23554  | 11.0  | 0.0033 |
| 2  | 69.0673  | 18367 | 46.2  | 9912   | 4.6   | 0.0038 |
| 3  | 71.0829  | 18520 | 55.3  | 11853  | 5.5   | 0.0038 |
| 4  | 81.0670  | 19040 | 37.0  | 7929   | 3.7   | 0.0043 |
| 5  | 316.2141 | 31930 | 42.1  | 9032   | 4.2   | 0.0099 |
| 6  | 334.2241 | 32508 | 108.1 | 23189  | 10.9  | 0.0103 |
| 7  | 338.2552 | 35362 | 996.2 | 213649 | 100.0 | 0.0096 |
| 8  | 339.2585 | 32049 | 217.4 | 46615  | 21.8  | 0.0106 |
| 9  | 354.2284 | 30750 | 52.1  | 11181  | 5.2   | 0.0115 |
| 10 | 437.1786 | 33042 | 38.2  | 8191   | 3.8   | 0.0132 |

## Cmpd 89, Dissect, 10.5 min

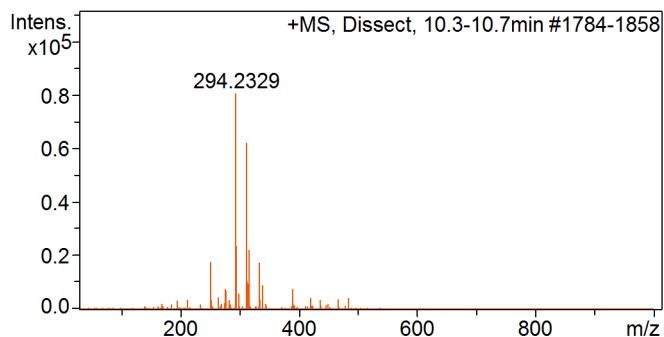

| #  | m/z      | Res.  | S/N   | I     | I %   | FWHM   |
|----|----------|-------|-------|-------|-------|--------|
| 1  | 252.2237 | 31105 | 220.3 | 17777 | 22.0  | 0.0081 |
| 2  | 294.2329 | 32805 | 999.5 | 80657 | 100.0 | 0.0090 |
| 3  | 295.2363 | 31061 | 293.7 | 23699 | 29.4  | 0.0095 |
| 4  | 312.2429 | 32309 | 767.9 | 61968 | 76.8  | 0.0097 |
| 5  | 313.2461 | 30132 | 130.6 | 10541 | 13.1  | 0.0104 |
| 6  | 316.2142 | 30921 | 120.1 | 9694  | 12.0  | 0.0102 |
| 7  | 316.2741 | 33142 | 276.6 | 22319 | 27.7  | 0.0095 |
| 8  | 334.2242 | 31356 | 218.3 | 17620 | 21.8  | 0.0107 |
| 9  | 339.2586 | 30981 | 113.7 | 9173  | 11.4  | 0.0110 |
| 10 | 390.2870 | 29863 | 96.8  | 7814  | 9.7   | 0.0131 |

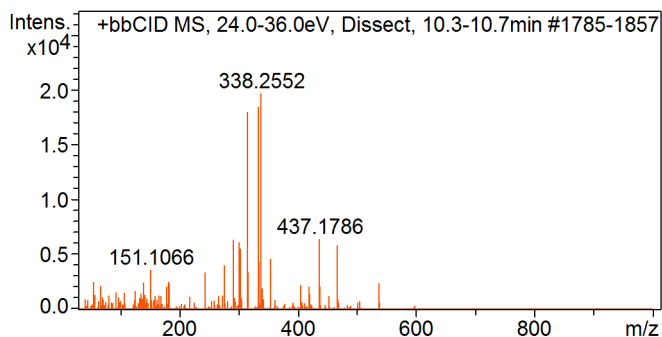

| #  | m/z      | Res.  | S/N   | I     | I %   | FWHM   |
|----|----------|-------|-------|-------|-------|--------|
| 1  | 292.2154 | 31249 | 323.3 | 6370  | 32.4  | 0.0094 |
| 2  | 301.1335 | 30819 | 310.2 | 6111  | 31.0  | 0.0098 |
| 3  | 304.2147 | 31440 | 282.0 | 5557  | 28.2  | 0.0097 |
| 4  | 316.2140 | 32079 | 909.9 | 17928 | 91.1  | 0.0099 |
| 5  | 334.2242 | 32667 | 933.8 | 18399 | 93.5  | 0.0102 |
| 6  | 335.2272 | 30627 | 222.2 | 4379  | 22.2  | 0.0109 |
| 7  | 338.2552 | 34661 | 999.1 | 19685 | 100.0 | 0.0098 |
| 8  | 354.2286 | 29017 | 233.6 | 4602  | 23.4  | 0.0122 |
| 9  | 437.1786 | 32718 | 327.1 | 6445  | 32.7  | 0.0134 |
| 10 | 466.9810 | 31688 | 296.0 | 5832  | 29.6  | 0.0147 |

# Compound Spectrum List Report

## Cmpd 90, Dissect, 10.6 min

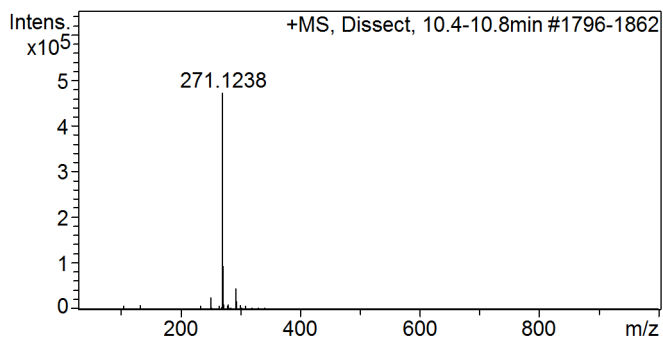

| #  | m/z      | Res.  | S/N   | I      | I %   | FWHM   |
|----|----------|-------|-------|--------|-------|--------|
| 1  | 133.0603 | 23932 | 19.6  | 9295   | 2.0   | 0.0056 |
| 2  | 252.2237 | 30764 | 56.3  | 26683  | 5.6   | 0.0082 |
| 3  | 271.1238 | 34194 | 996.6 | 472648 | 100.0 | 0.0079 |
| 4  | 271.2372 | 28741 | 18.9  | 8950   | 1.9   | 0.0094 |
| 5  | 272.1273 | 32101 | 201.5 | 95573  | 20.2  | 0.0085 |
| 6  | 273.1318 | 15917 | 23.0  | 10890  | 2.3   | 0.0172 |
| 7  | 280.2535 | 26000 | 22.6  | 10722  | 2.3   | 0.0108 |
| 8  | 293.1051 | 31183 | 99.4  | 47131  | 10.0  | 0.0094 |
| 9  | 294.2329 | 32619 | 36.5  | 17322  | 3.7   | 0.0090 |
| 10 | 301.1334 | 30490 | 19.3  | 9137   | 1.9   | 0.0099 |

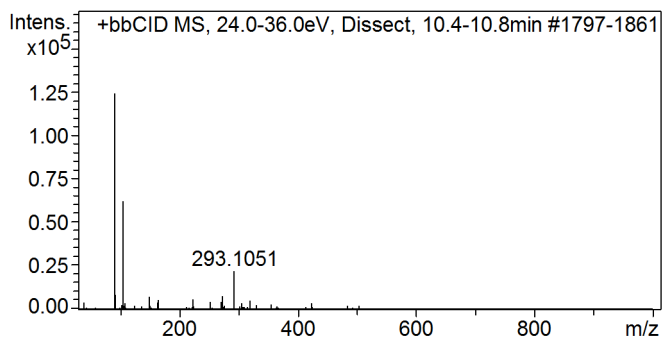

| #  | m/z      | Res.  | S/N   | I      | I %   | FWHM   |
|----|----------|-------|-------|--------|-------|--------|
| 1  | 91.0512  | 20839 | 996.3 | 124308 | 100.0 | 0.0044 |
| 2  | 92.0545  | 19007 | 67.9  | 8470   | 6.8   | 0.0048 |
| 3  | 105.0664 | 21870 | 497.4 | 62059  | 49.9  | 0.0048 |
| 4  | 149.0182 | 23458 | 48.3  | 6027   | 4.8   | 0.0064 |
| 5  | 149.0911 | 25348 | 57.3  | 7152   | 5.8   | 0.0059 |
| 6  | 149.1274 | 25852 | 60.5  | 7550   | 6.1   | 0.0058 |
| 7  | 165.0490 | 25909 | 44.8  | 5594   | 4.5   | 0.0064 |
| 8  | 224.0756 | 26883 | 49.8  | 6213   | 5.0   | 0.0083 |
| 9  | 273.1394 | 30235 | 64.5  | 8050   | 6.5   | 0.0090 |
| 10 | 293.1051 | 32075 | 178.3 | 22250  | 17.9  | 0.0091 |

## Cmpd 91, Dissect, 10.7 min

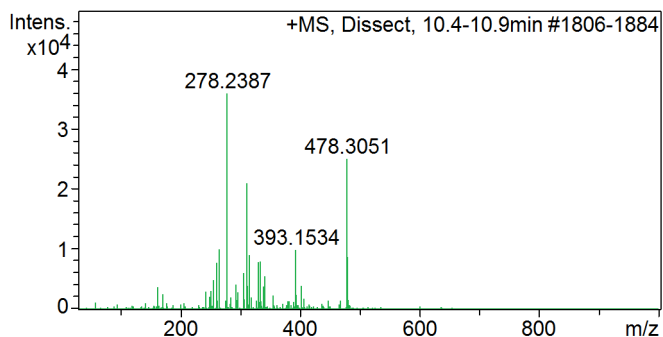

| #  | m/z      | Res.  | S/N   | I     | I %   | FWHM   |
|----|----------|-------|-------|-------|-------|--------|
| 1  | 261.2127 | 28647 | 217.4 | 7825  | 21.7  | 0.0091 |
| 2  | 266.2391 | 30404 | 279.8 | 10070 | 28.0  | 0.0088 |
| 3  | 278.2387 | 31730 | 999.8 | 35983 | 100.0 | 0.0088 |
| 4  | 312.2431 | 31065 | 583.6 | 21003 | 58.4  | 0.0101 |
| 5  | 316.2142 | 30575 | 252.9 | 9101  | 25.3  | 0.0103 |
| 6  | 331.2060 | 30140 | 220.4 | 7934  | 22.0  | 0.0110 |
| 7  | 334.2241 | 30094 | 221.4 | 7968  | 22.1  | 0.0111 |
| 8  | 393.1534 | 30732 | 277.4 | 9983  | 27.7  | 0.0128 |
| 9  | 478.3051 | 31687 | 695.6 | 25034 | 69.6  | 0.0151 |
| 10 | 479.3088 | 29148 | 242.7 | 8734  | 24.3  | 0.0164 |

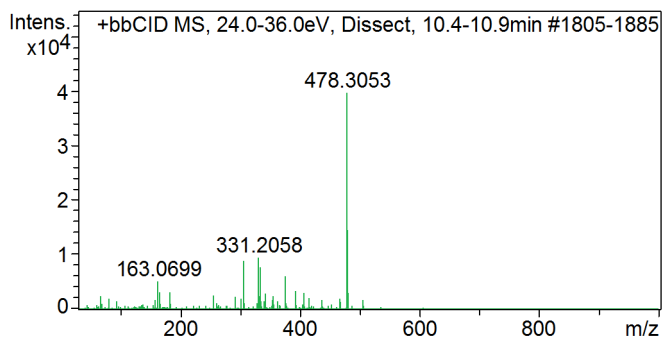

| #  | m/z      | Res.  | S/N   | I     | I %   | FWHM   |
|----|----------|-------|-------|-------|-------|--------|
| 1  | 163.0699 | 26604 | 132.0 | 5237  | 13.2  | 0.0061 |
| 2  | 166.0595 | 27246 | 79.7  | 3162  | 8.0   | 0.0061 |
| 3  | 183.0853 | 28521 | 80.5  | 3193  | 8.1   | 0.0064 |
| 4  | 306.2301 | 31532 | 224.2 | 8898  | 22.4  | 0.0097 |
| 5  | 331.2058 | 31703 | 241.1 | 9569  | 24.1  | 0.0104 |
| 6  | 334.2241 | 31620 | 195.2 | 7747  | 19.5  | 0.0106 |
| 7  | 376.1273 | 30925 | 155.9 | 6188  | 15.6  | 0.0122 |
| 8  | 393.1534 | 26350 | 86.7  | 3440  | 8.7   | 0.0149 |
| 9  | 478.3053 | 32545 | 999.1 | 39650 | 100.0 | 0.0147 |
| 10 | 479.3083 | 30379 | 366.1 | 14528 | 36.6  | 0.0158 |

# Compound Spectrum List Report

## Cmpd 92, Dissect, 10.7 min

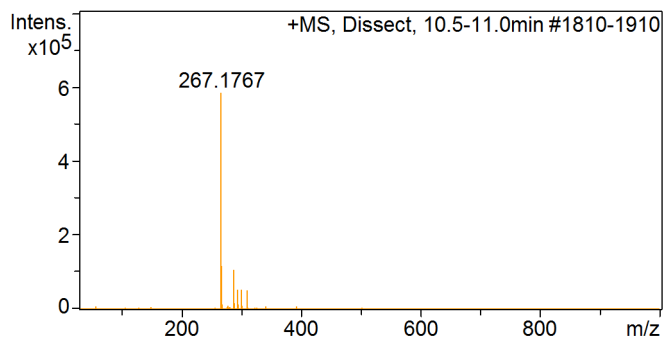

| #  | m/z      | Res.  | S/N   | I      | I %   | FWHM   |
|----|----------|-------|-------|--------|-------|--------|
| 1  | 267.1767 | 34363 | 990.7 | 584739 | 100.0 | 0.0078 |
| 2  | 268.1801 | 30862 | 200.2 | 118194 | 20.2  | 0.0087 |
| 3  | 269.1084 | 29926 | 18.9  | 11162  | 1.9   | 0.0090 |
| 4  | 269.1843 | 25427 | 21.3  | 12559  | 2.1   | 0.0106 |
| 5  | 288.2439 | 32839 | 183.6 | 108361 | 18.5  | 0.0088 |
| 6  | 289.2473 | 29799 | 28.2  | 16670  | 2.9   | 0.0097 |
| 7  | 294.2330 | 32892 | 91.1  | 53780  | 9.2   | 0.0089 |
| 8  | 295.2364 | 31515 | 21.3  | 12589  | 2.2   | 0.0094 |
| 9  | 301.1334 | 31610 | 93.3  | 55089  | 9.4   | 0.0095 |
| 10 | 310.2250 | 31669 | 89.2  | 52642  | 9.0   | 0.0098 |

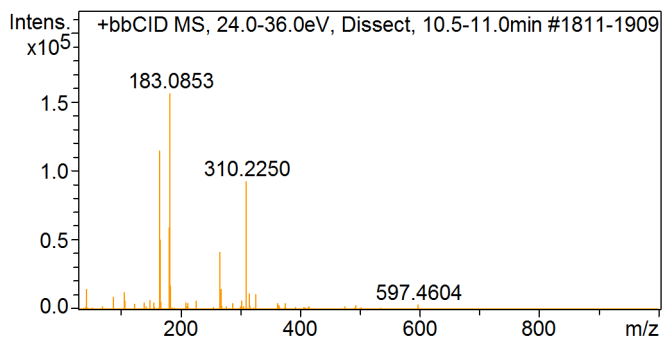

| #  | m/z      | Res.  | S/N   | I      | I %   | FWHM   |
|----|----------|-------|-------|--------|-------|--------|
| 1  | 43.0524  | 15330 | 95.7  | 14949  | 9.6   | 0.0028 |
| 2  | 106.0828 | 21021 | 81.8  | 12777  | 8.2   | 0.0050 |
| 3  | 166.0595 | 27587 | 733.2 | 114506 | 73.4  | 0.0060 |
| 4  | 167.0666 | 23205 | 322.7 | 50398  | 32.3  | 0.0072 |
| 5  | 182.0777 | 28375 | 378.8 | 59166  | 37.9  | 0.0064 |
| 6  | 183.0853 | 28876 | 998.7 | 155974 | 100.0 | 0.0063 |
| 7  | 184.0892 | 23342 | 110.0 | 17182  | 11.0  | 0.0079 |
| 8  | 267.1766 | 31473 | 268.3 | 41901  | 26.9  | 0.0085 |
| 9  | 269.1082 | 30380 | 95.7  | 14945  | 9.6   | 0.0089 |
| 10 | 310.2250 | 32870 | 593.6 | 92708  | 59.4  | 0.0094 |

## Cmpd 93, Dissect, 10.9 min

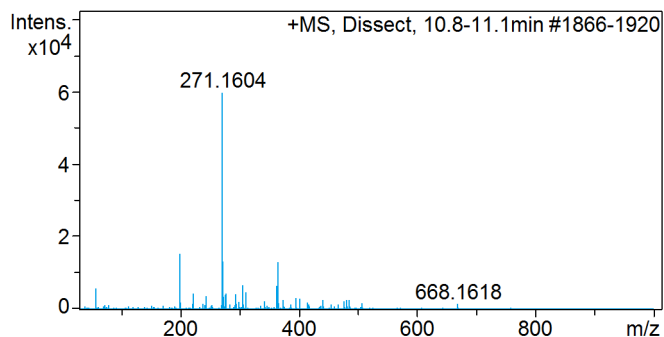

| #  | m/z      | Res.  | S/N   | I     | I %   | FWHM   |
|----|----------|-------|-------|-------|-------|--------|
| 1  | 57.0676  | 17166 | 98.3  | 5877  | 9.8   | 0.0033 |
| 2  | 200.1942 | 29845 | 257.7 | 15404 | 25.8  | 0.0067 |
| 3  | 223.0891 | 29688 | 76.2  | 4554  | 7.6   | 0.0075 |
| 4  | 271.1604 | 30593 | 998.5 | 59691 | 100.0 | 0.0089 |
| 5  | 272.1637 | 29892 | 220.8 | 13198 | 22.1  | 0.0091 |
| 6  | 278.2386 | 30177 | 75.1  | 4489  | 7.5   | 0.0092 |
| 7  | 306.0879 | 30311 | 113.4 | 6780  | 11.4  | 0.0101 |
| 8  | 311.1160 | 30184 | 81.2  | 4855  | 8.1   | 0.0103 |
| 9  | 363.0471 | 32465 | 110.7 | 6620  | 11.1  | 0.0112 |
| 10 | 365.0449 | 31361 | 220.1 | 13157 | 22.0  | 0.0116 |

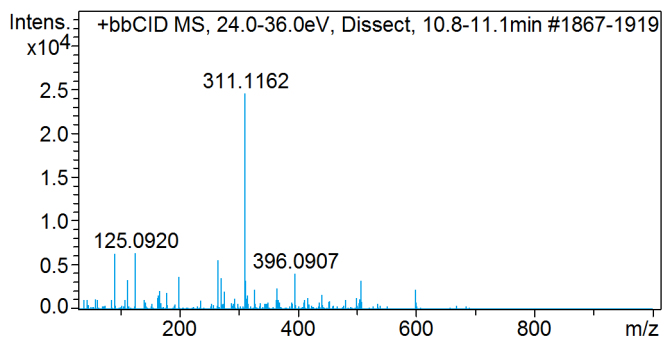

| #  | m/z      | Res.  | S/N   | I     | I %   | FWHM   |
|----|----------|-------|-------|-------|-------|--------|
| 1  | 91.0513  | 19970 | 257.5 | 6333  | 25.8  | 0.0046 |
| 2  | 113.0923 | 22093 | 137.3 | 3376  | 13.7  | 0.0051 |
| 3  | 125.0920 | 23625 | 259.8 | 6391  | 26.0  | 0.0053 |
| 4  | 200.1941 | 28954 | 152.6 | 3754  | 15.3  | 0.0069 |
| 5  | 266.1214 | 28722 | 228.9 | 5630  | 22.9  | 0.0093 |
| 6  | 271.1604 | 28762 | 144.6 | 3556  | 14.5  | 0.0094 |
| 7  | 311.1162 | 33089 | 999.3 | 24580 | 100.0 | 0.0094 |
| 8  | 312.1195 | 30257 | 133.9 | 3292  | 13.4  | 0.0103 |
| 9  | 396.0907 | 31669 | 166.6 | 4098  | 16.7  | 0.0125 |
| 10 | 507.3595 | 30911 | 132.9 | 3269  | 13.3  | 0.0164 |

# Compound Spectrum List Report

## Cmpd 94, Dissect, 11.0 min

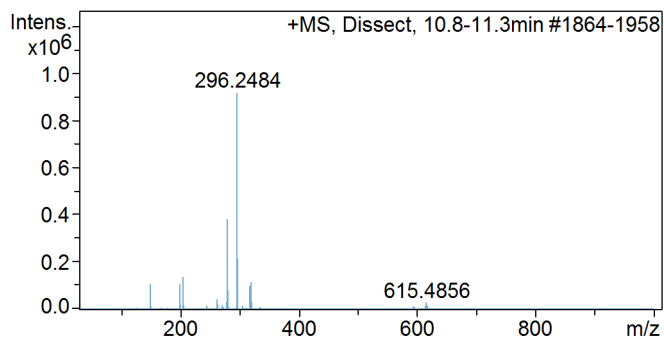

| #  | m/z      | Res.  | S/N   | I      | I %   | FWHM   |
|----|----------|-------|-------|--------|-------|--------|
| 1  | 149.0184 | 26253 | 119.7 | 109994 | 12.0  | 0.0057 |
| 2  | 200.1941 | 29865 | 118.8 | 109171 | 11.9  | 0.0067 |
| 3  | 205.0791 | 30373 | 152.4 | 140078 | 15.3  | 0.0068 |
| 4  | 263.2282 | 31786 | 48.4  | 44520  | 4.9   | 0.0083 |
| 5  | 280.2542 | 36421 | 416.2 | 382525 | 41.7  | 0.0077 |
| 6  | 281.2576 | 32018 | 88.7  | 81553  | 8.9   | 0.0088 |
| 7  | 296.2484 | 38077 | 997.6 | 916947 | 100.0 | 0.0078 |
| 8  | 297.2519 | 35136 | 232.8 | 214016 | 23.3  | 0.0085 |
| 9  | 318.2297 | 34703 | 110.3 | 101380 | 11.1  | 0.0092 |
| 10 | 320.2453 | 33384 | 127.6 | 117330 | 12.8  | 0.0096 |

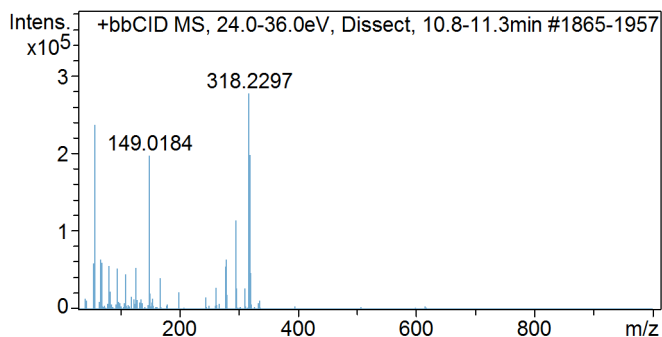

| #  | m/z      | Res.  | S/N   | I      | I %   | FWHM   |
|----|----------|-------|-------|--------|-------|--------|
| 1  | 55.0520  | 17397 | 214.3 | 59649  | 21.5  | 0.0032 |
| 2  | 57.0676  | 17758 | 849.6 | 236425 | 85.2  | 0.0032 |
| 3  | 67.0518  | 18267 | 230.8 | 64233  | 23.1  | 0.0037 |
| 4  | 69.0673  | 18545 | 215.3 | 59906  | 21.6  | 0.0037 |
| 5  | 149.0184 | 27241 | 708.1 | 197049 | 71.0  | 0.0055 |
| 6  | 280.2544 | 32966 | 231.8 | 64495  | 23.2  | 0.0085 |
| 7  | 296.2487 | 33916 | 409.8 | 114051 | 41.1  | 0.0087 |
| 8  | 318.2297 | 36370 | 997.3 | 277527 | 100.0 | 0.0087 |
| 9  | 319.2331 | 33717 | 250.7 | 69777  | 25.1  | 0.0095 |
| 10 | 320.2453 | 34647 | 709.9 | 197563 | 71.2  | 0.0092 |

## Cmpd 95, Dissect, 11.1 min

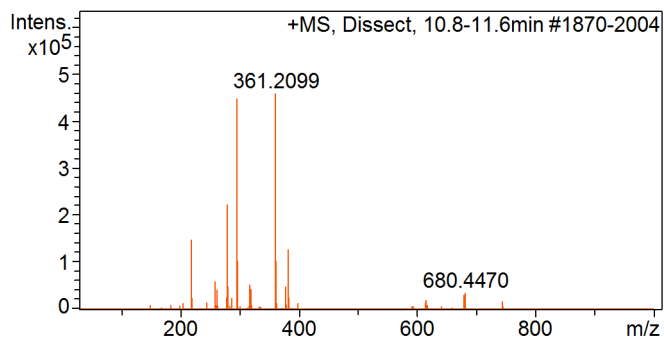

| #  | m/z      | Res.  | S/N   | I      | I %   | FWHM   |
|----|----------|-------|-------|--------|-------|--------|
| 1  | 219.1670 | 30074 | 318.0 | 148674 | 32.3  | 0.0073 |
| 2  | 259.1454 | 30712 | 129.2 | 60405  | 13.1  | 0.0084 |
| 3  | 280.2541 | 36609 | 477.9 | 223424 | 48.6  | 0.0077 |
| 4  | 281.2575 | 31788 | 105.8 | 49438  | 10.8  | 0.0088 |
| 5  | 296.2484 | 37964 | 957.9 | 447810 | 97.4  | 0.0078 |
| 6  | 297.2519 | 35818 | 220.5 | 103091 | 22.4  | 0.0083 |
| 7  | 318.2296 | 34768 | 115.7 | 54063  | 11.8  | 0.0092 |
| 8  | 361.2099 | 37836 | 983.5 | 459739 | 100.0 | 0.0095 |
| 9  | 362.2133 | 33080 | 221.1 | 103345 | 22.5  | 0.0109 |
| 10 | 383.1911 | 34776 | 275.2 | 128634 | 28.0  | 0.0110 |

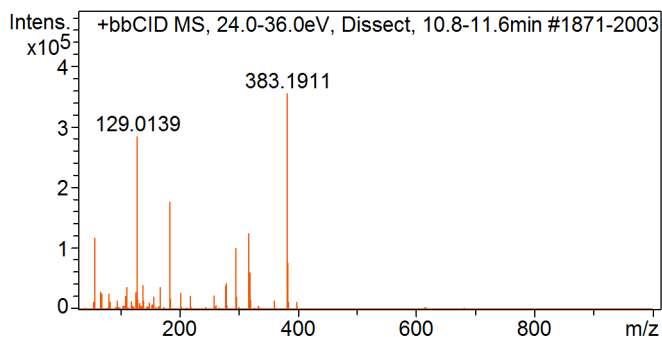

| #  | m/z      | Res.  | S/N   | I      | I %   | FWHM   |
|----|----------|-------|-------|--------|-------|--------|
| 1  | 57.0676  | 17746 | 331.4 | 117985 | 33.2  | 0.0032 |
| 2  | 129.0139 | 25116 | 796.7 | 283622 | 79.8  | 0.0051 |
| 3  | 138.9979 | 24847 | 113.3 | 40324  | 11.3  | 0.0056 |
| 4  | 185.0746 | 29975 | 497.9 | 177257 | 49.9  | 0.0062 |
| 5  | 280.2543 | 32634 | 122.0 | 43438  | 12.2  | 0.0086 |
| 6  | 296.2486 | 34217 | 284.3 | 101214 | 28.5  | 0.0087 |
| 7  | 318.2296 | 36821 | 353.3 | 125782 | 35.4  | 0.0086 |
| 8  | 320.2452 | 34823 | 171.8 | 61168  | 17.2  | 0.0092 |
| 9  | 383.1911 | 37613 | 998.6 | 355516 | 100.0 | 0.0102 |
| 10 | 384.1946 | 32859 | 216.3 | 77002  | 21.7  | 0.0117 |



# Compound Spectrum List Report

## Cmpd 96, Dissect, 11.2 min

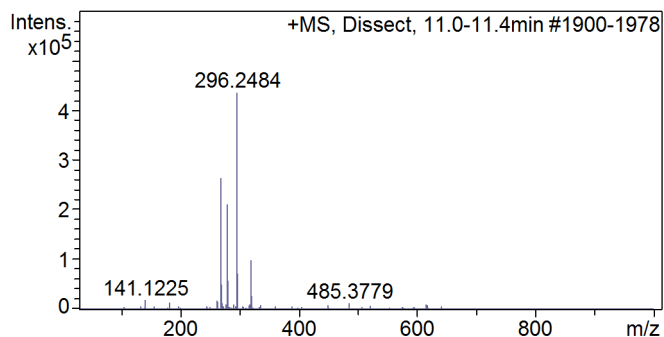

| #  | m/z      | Res.  | S/N   | I      | I %   | FWHM   |
|----|----------|-------|-------|--------|-------|--------|
| 1  | 141.1225 | 24940 | 41.5  | 18057  | 4.2   | 0.0057 |
| 2  | 263.2282 | 31557 | 40.1  | 17478  | 4.0   | 0.0083 |
| 3  | 269.1083 | 32877 | 606.4 | 264083 | 60.7  | 0.0082 |
| 4  | 270.1117 | 29278 | 115.3 | 50221  | 11.5  | 0.0092 |
| 5  | 280.2541 | 36566 | 485.2 | 211313 | 48.6  | 0.0077 |
| 6  | 281.2574 | 31772 | 132.6 | 57764  | 13.3  | 0.0089 |
| 7  | 296.2484 | 37545 | 999.0 | 435041 | 100.0 | 0.0079 |
| 8  | 297.2518 | 36328 | 167.3 | 72862  | 16.7  | 0.0082 |
| 9  | 320.2452 | 33470 | 227.6 | 99109  | 22.8  | 0.0096 |
| 10 | 321.2486 | 30361 | 62.1  | 27050  | 6.2   | 0.0106 |

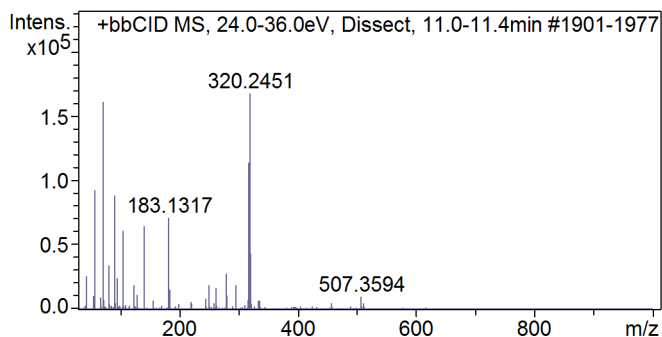

| #  | m/z      | Res.  | S/N   | I      | I %   | FWHM   |
|----|----------|-------|-------|--------|-------|--------|
| 1  | 57.0676  | 17651 | 550.4 | 92682  | 55.2  | 0.0032 |
| 2  | 71.0828  | 19097 | 958.4 | 161387 | 96.2  | 0.0037 |
| 3  | 81.0670  | 20002 | 203.7 | 34293  | 20.4  | 0.0041 |
| 4  | 91.0511  | 20499 | 525.3 | 88445  | 52.7  | 0.0044 |
| 5  | 105.0663 | 21705 | 363.2 | 61152  | 36.4  | 0.0048 |
| 6  | 141.1227 | 25115 | 383.5 | 64575  | 38.5  | 0.0056 |
| 7  | 183.1317 | 28154 | 423.0 | 71230  | 42.4  | 0.0065 |
| 8  | 318.2295 | 37055 | 676.1 | 113850 | 67.8  | 0.0086 |
| 9  | 320.2451 | 34735 | 996.6 | 167805 | 100.0 | 0.0092 |
| 10 | 321.2486 | 31570 | 257.6 | 43369  | 25.8  | 0.0102 |

## Cmpd 97, Dissect, 11.2 min

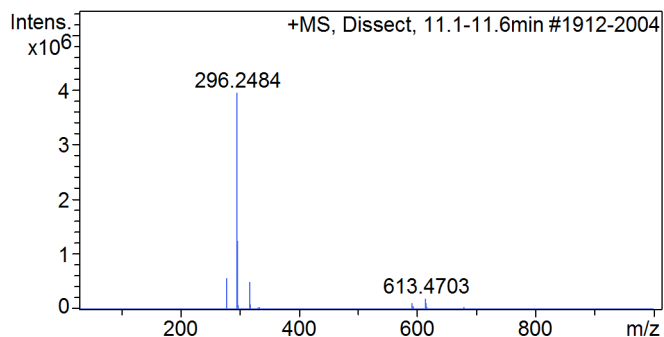

| #  | m/z      | Res.  | S/N   | I       | I %   | FWHM   |
|----|----------|-------|-------|---------|-------|--------|
| 1  | 279.2226 | 33820 | 143.6 | 571449  | 14.5  | 0.0083 |
| 2  | 296.2484 | 37450 | 991.7 | 3947587 | 100.0 | 0.0079 |
| 3  | 297.2518 | 36587 | 313.4 | 1247420 | 31.6  | 0.0081 |
| 4  | 298.2560 | 24554 | 17.7  | 70653   | 1.8   | 0.0121 |
| 5  | 318.2296 | 35238 | 126.5 | 503733  | 12.8  | 0.0090 |
| 6  | 319.2328 | 30812 | 22.7  | 90540   | 2.3   | 0.0104 |
| 7  | 591.4891 | 31345 | 27.5  | 109614  | 2.8   | 0.0189 |
| 8  | 613.4703 | 32720 | 52.1  | 207516  | 5.3   | 0.0187 |
| 9  | 614.4735 | 30870 | 24.4  | 97166   | 2.5   | 0.0199 |
| 10 | 615.4855 | 31447 | 27.6  | 109835  | 2.8   | 0.0196 |

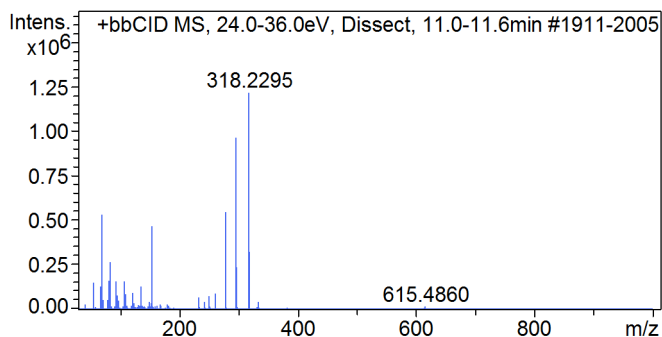

| #  | m/z      | Res.  | S/N   | I       | I %   | FWHM   |
|----|----------|-------|-------|---------|-------|--------|
| 1  | 69.0672  | 19017 | 435.6 | 530925  | 43.7  | 0.0036 |
| 2  | 81.0670  | 20081 | 133.9 | 163240  | 13.4  | 0.0040 |
| 3  | 83.0825  | 20072 | 218.3 | 266021  | 21.9  | 0.0041 |
| 4  | 107.0820 | 21797 | 130.6 | 159140  | 13.1  | 0.0049 |
| 5  | 153.1222 | 27145 | 384.0 | 467966  | 38.5  | 0.0056 |
| 6  | 279.2227 | 32777 | 448.4 | 546464  | 45.0  | 0.0085 |
| 7  | 296.2485 | 35145 | 788.7 | 961200  | 79.1  | 0.0084 |
| 8  | 297.2519 | 32617 | 195.0 | 237697  | 19.6  | 0.0091 |
| 9  | 318.2295 | 37514 | 997.3 | 1215464 | 100.0 | 0.0085 |
| 10 | 319.2330 | 33714 | 266.6 | 324961  | 26.7  | 0.0095 |

# Compound Spectrum List Report

## Cmpd 98, Dissect, 11.3 min

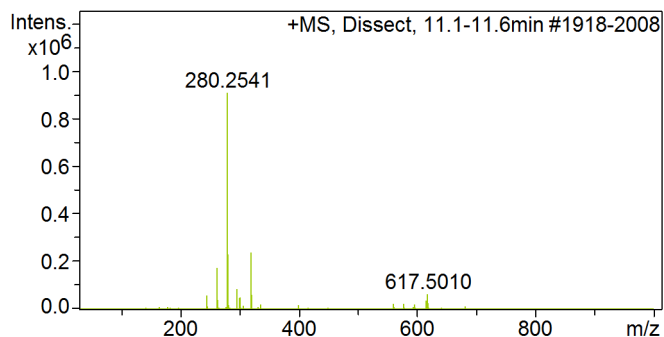

| #  | m/z      | Res.  | S/N   | I      | I %   | FWHM   |
|----|----------|-------|-------|--------|-------|--------|
| 1  | 245.2181 | 30205 | 65.6  | 59933  | 6.6   | 0.0081 |
| 2  | 263.2282 | 32441 | 191.5 | 175077 | 19.2  | 0.0081 |
| 3  | 280.2541 | 37168 | 995.3 | 909947 | 100.0 | 0.0075 |
| 4  | 281.2574 | 32793 | 252.6 | 230963 | 25.4  | 0.0086 |
| 5  | 296.2484 | 37859 | 94.3  | 86195  | 9.5   | 0.0078 |
| 6  | 300.9823 | 31546 | 55.5  | 50766  | 5.6   | 0.0095 |
| 7  | 301.1487 | 31653 | 58.4  | 53416  | 5.9   | 0.0095 |
| 8  | 320.2452 | 34410 | 261.8 | 239326 | 26.3  | 0.0093 |
| 9  | 321.2486 | 31068 | 68.6  | 62736  | 6.9   | 0.0103 |
| 10 | 617.5010 | 30042 | 71.0  | 64872  | 7.1   | 0.0206 |

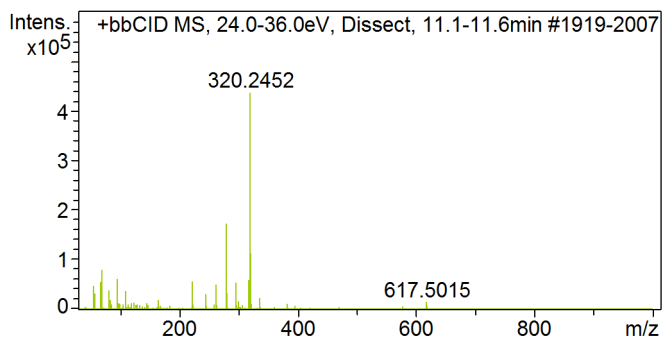

| #  | m/z      | Res.  | S/N   | I      | I %   | FWHM   |
|----|----------|-------|-------|--------|-------|--------|
| 1  | 67.0518  | 18369 | 127.4 | 55682  | 12.8  | 0.0037 |
| 2  | 69.0673  | 19003 | 183.6 | 80196  | 18.4  | 0.0036 |
| 3  | 95.0823  | 21123 | 144.3 | 63057  | 14.4  | 0.0045 |
| 4  | 223.1043 | 29606 | 130.4 | 56966  | 13.1  | 0.0075 |
| 5  | 263.2282 | 30150 | 116.7 | 51001  | 11.7  | 0.0087 |
| 6  | 280.2542 | 33160 | 396.7 | 173318 | 39.7  | 0.0085 |
| 7  | 296.2486 | 34874 | 124.5 | 54405  | 12.5  | 0.0085 |
| 8  | 318.2295 | 37147 | 137.9 | 60260  | 13.8  | 0.0086 |
| 9  | 320.2452 | 36357 | 999.0 | 436495 | 100.0 | 0.0088 |
| 10 | 321.2487 | 32210 | 259.8 | 113496 | 26.0  | 0.0100 |

## Cmpd 99, Dissect, 11.4 min

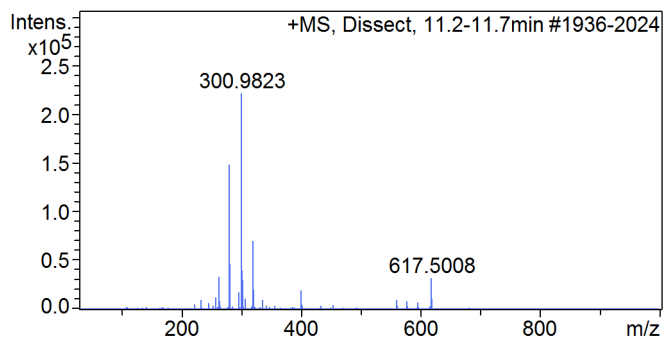

| #  | m/z      | Res.  | S/N   | I      | I %   | FWHM   |
|----|----------|-------|-------|--------|-------|--------|
| 1  | 263.2282 | 31325 | 152.0 | 33778  | 15.2  | 0.0084 |
| 2  | 280.2541 | 36089 | 667.6 | 148334 | 66.9  | 0.0078 |
| 3  | 281.2575 | 31721 | 210.7 | 46816  | 21.1  | 0.0089 |
| 4  | 300.9823 | 32215 | 997.4 | 221619 | 100.0 | 0.0093 |
| 5  | 301.1487 | 31630 | 683.7 | 151920 | 68.6  | 0.0095 |
| 6  | 301.9851 | 28312 | 182.4 | 40518  | 18.3  | 0.0107 |
| 7  | 302.1521 | 30274 | 173.9 | 38644  | 17.4  | 0.0100 |
| 8  | 302.9783 | 29030 | 137.5 | 30562  | 13.8  | 0.0104 |
| 9  | 320.2453 | 33426 | 316.4 | 70315  | 31.7  | 0.0096 |
| 10 | 617.5008 | 29690 | 144.5 | 32097  | 14.5  | 0.0208 |

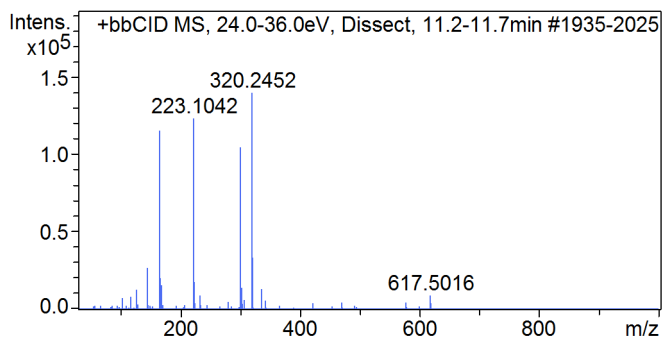

| #  | m/z      | Res.  | S/N   | I      | I %   | FWHM   |
|----|----------|-------|-------|--------|-------|--------|
| 1  | 145.0599 | 25520 | 193.5 | 27057  | 19.4  | 0.0057 |
| 2  | 165.9723 | 27189 | 822.8 | 115060 | 82.3  | 0.0061 |
| 3  | 166.9790 | 20220 | 120.7 | 16883  | 12.1  | 0.0083 |
| 4  | 167.1374 | 26721 | 146.6 | 20498  | 14.7  | 0.0063 |
| 5  | 169.1166 | 27107 | 113.9 | 15933  | 11.4  | 0.0062 |
| 6  | 223.1042 | 29983 | 880.1 | 123074 | 88.1  | 0.0074 |
| 7  | 224.1077 | 29077 | 128.0 | 17906  | 12.8  | 0.0077 |
| 8  | 300.9823 | 31999 | 745.6 | 104266 | 74.6  | 0.0094 |
| 9  | 320.2452 | 34937 | 999.4 | 139757 | 100.0 | 0.0092 |
| 10 | 321.2487 | 31598 | 240.4 | 33614  | 24.1  | 0.0102 |

# Compound Spectrum List Report

## Cmpd 100, Dissect, 11.5 min

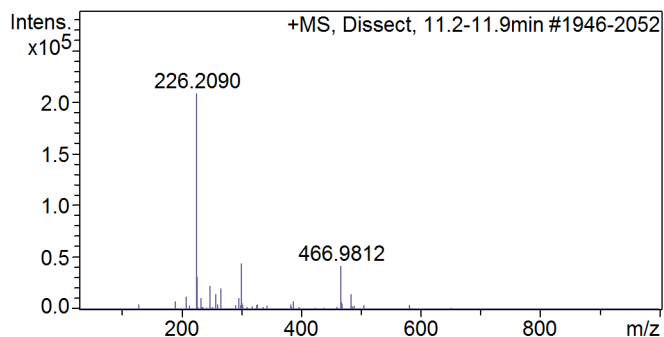

| #  | m/z      | Res.  | S/N   | I      | I %   | FWHM   |
|----|----------|-------|-------|--------|-------|--------|
| 1  | 226.2090 | 31551 | 999.4 | 208773 | 100.0 | 0.0072 |
| 2  | 227.2124 | 29165 | 153.0 | 31964  | 15.3  | 0.0078 |
| 3  | 248.1904 | 29586 | 110.1 | 22995  | 11.0  | 0.0084 |
| 4  | 248.2501 | 29848 | 62.5  | 13061  | 6.3   | 0.0083 |
| 5  | 258.0320 | 29240 | 72.4  | 15127  | 7.2   | 0.0088 |
| 6  | 267.0928 | 30861 | 97.9  | 20459  | 9.8   | 0.0087 |
| 7  | 300.9823 | 32141 | 214.2 | 44741  | 21.4  | 0.0094 |
| 8  | 301.1488 | 30771 | 102.4 | 21391  | 10.2  | 0.0098 |
| 9  | 466.9812 | 34302 | 201.3 | 42049  | 20.1  | 0.0136 |
| 10 | 484.0070 | 31449 | 72.6  | 15171  | 7.3   | 0.0154 |

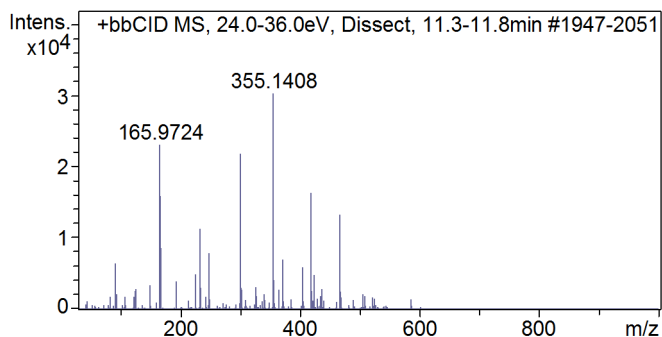

| #  | m/z      | Res.  | S/N   | I     | I %   | FWHM   |
|----|----------|-------|-------|-------|-------|--------|
| 1  | 165.9724 | 27212 | 758.8 | 23008 | 75.9  | 0.0061 |
| 2  | 166.9791 | 20336 | 246.9 | 7486  | 24.7  | 0.0082 |
| 3  | 167.1374 | 27074 | 522.4 | 15841 | 52.3  | 0.0062 |
| 4  | 167.9880 | 27560 | 286.0 | 8673  | 28.6  | 0.0061 |
| 5  | 233.2187 | 30205 | 372.6 | 11299 | 37.3  | 0.0077 |
| 6  | 248.9723 | 30173 | 260.5 | 7899  | 26.1  | 0.0083 |
| 7  | 300.9824 | 31979 | 718.7 | 21793 | 71.9  | 0.0094 |
| 8  | 355.1408 | 32527 | 999.7 | 30312 | 100.0 | 0.0109 |
| 9  | 418.9794 | 31900 | 538.5 | 16328 | 53.9  | 0.0131 |
| 10 | 466.9813 | 33159 | 439.5 | 13327 | 44.0  | 0.0141 |

## Cmpd 101, Dissect, 11.6 min

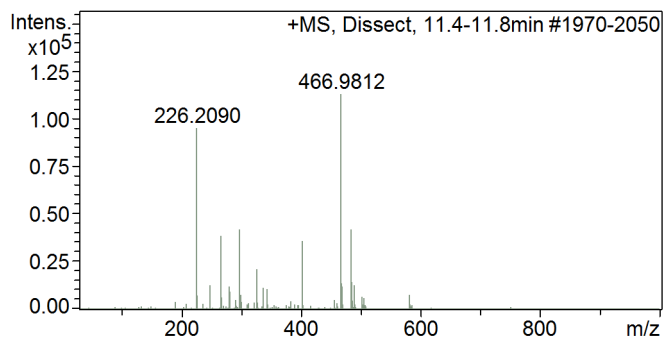

| #  | m/z      | Res.  | S/N   | I      | I %   | FWHM   |
|----|----------|-------|-------|--------|-------|--------|
| 1  | 226.2090 | 30877 | 838.0 | 94826  | 83.8  | 0.0073 |
| 2  | 248.1904 | 30532 | 115.2 | 13030  | 11.5  | 0.0081 |
| 3  | 267.0929 | 30981 | 340.6 | 38537  | 34.1  | 0.0086 |
| 4  | 298.2641 | 32704 | 372.4 | 42142  | 37.3  | 0.0091 |
| 5  | 326.3673 | 31704 | 188.4 | 21319  | 18.8  | 0.0103 |
| 6  | 402.1420 | 38296 | 317.8 | 35961  | 31.8  | 0.0105 |
| 7  | 466.9812 | 34605 | 999.5 | 113100 | 100.0 | 0.0135 |
| 8  | 467.9838 | 30642 | 122.7 | 13887  | 12.3  | 0.0153 |
| 9  | 484.0070 | 31935 | 372.4 | 42139  | 37.3  | 0.0152 |
| 10 | 485.2731 | 32698 | 127.2 | 14396  | 12.7  | 0.0148 |

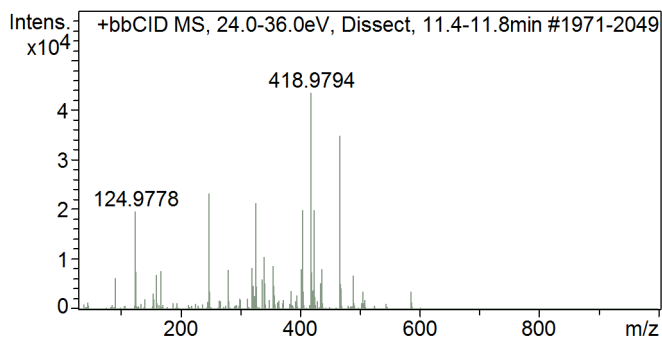

| #  | m/z      | Res.  | S/N   | I     | I %   | FWHM   |
|----|----------|-------|-------|-------|-------|--------|
| 1  | 124.9778 | 24201 | 453.0 | 19696 | 45.3  | 0.0052 |
| 2  | 248.9722 | 30523 | 535.3 | 23279 | 53.6  | 0.0082 |
| 3  | 320.2453 | 32973 | 193.2 | 8403  | 19.3  | 0.0097 |
| 4  | 326.3672 | 32661 | 490.2 | 21318 | 49.1  | 0.0100 |
| 5  | 340.9951 | 31484 | 241.8 | 10516 | 24.2  | 0.0108 |
| 6  | 355.1409 | 32620 | 203.2 | 8838  | 20.3  | 0.0109 |
| 7  | 404.9644 | 32619 | 457.4 | 19891 | 45.8  | 0.0124 |
| 8  | 418.9794 | 32111 | 999.1 | 43444 | 100.0 | 0.0130 |
| 9  | 424.1231 | 34032 | 459.0 | 19957 | 45.9  | 0.0125 |
| 10 | 466.9813 | 33361 | 801.0 | 34829 | 80.2  | 0.0140 |

# Compound Spectrum List Report

## Cmpd 102, Dissect, 11.7 min

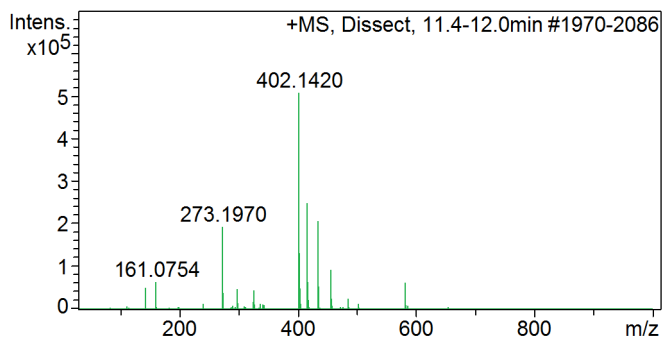

| #  | m/z      | Res.  | S/N   | I      | I %   | FWHM   |
|----|----------|-------|-------|--------|-------|--------|
| 1  | 161.0754 | 26636 | 128.5 | 65360  | 12.9  | 0.0060 |
| 2  | 273.1970 | 33089 | 380.2 | 193381 | 38.1  | 0.0083 |
| 3  | 402.1420 | 38660 | 998.1 | 507630 | 100.0 | 0.0104 |
| 4  | 403.1452 | 33763 | 261.3 | 132886 | 26.2  | 0.0119 |
| 5  | 416.1571 | 37061 | 489.8 | 249142 | 49.1  | 0.0112 |
| 6  | 417.1602 | 32522 | 127.8 | 65004  | 12.8  | 0.0128 |
| 7  | 434.1671 | 35156 | 408.1 | 207587 | 40.9  | 0.0123 |
| 8  | 435.1703 | 31552 | 107.2 | 54513  | 10.7  | 0.0138 |
| 9  | 456.1483 | 33623 | 183.2 | 93154  | 18.4  | 0.0136 |
| 10 | 581.0646 | 33254 | 125.0 | 63576  | 12.5  | 0.0175 |

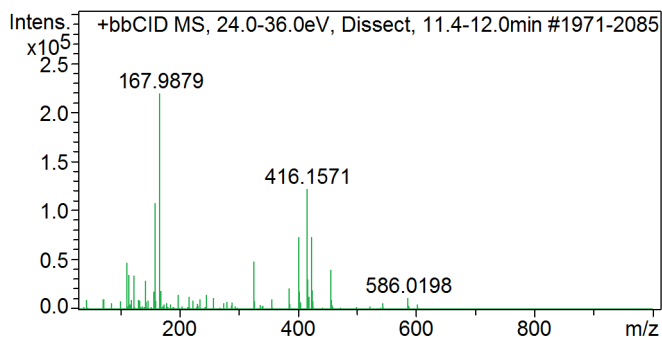

| #  | m/z      | Res.  | S/N   | I      | I %   | FWHM   |
|----|----------|-------|-------|--------|-------|--------|
| 1  | 111.0404 | 21594 | 214.9 | 47357  | 21.6  | 0.0051 |
| 2  | 115.0716 | 22256 | 159.6 | 35176  | 16.0  | 0.0052 |
| 3  | 123.0763 | 23624 | 158.0 | 34811  | 15.9  | 0.0052 |
| 4  | 159.1114 | 27179 | 488.9 | 107739 | 49.1  | 0.0059 |
| 5  | 167.9879 | 28818 | 996.2 | 219521 | 100.0 | 0.0058 |
| 6  | 326.3672 | 32962 | 221.4 | 48793  | 22.2  | 0.0099 |
| 7  | 402.1420 | 34875 | 333.6 | 73517  | 33.5  | 0.0115 |
| 8  | 416.1571 | 37228 | 554.8 | 122258 | 55.7  | 0.0112 |
| 9  | 424.1231 | 34160 | 332.4 | 73250  | 33.4  | 0.0124 |
| 10 | 456.1483 | 32854 | 185.1 | 40786  | 18.6  | 0.0139 |

## Cmpd 103, Dissect, 11.8 min

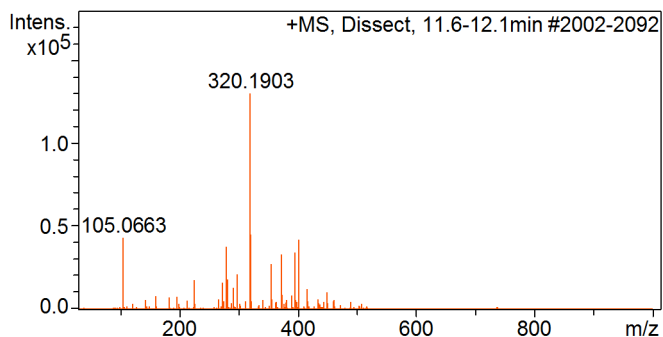

| #  | m/z      | Res.  | S/N   | I      | I %   | FWHM   |
|----|----------|-------|-------|--------|-------|--------|
| 1  | 105.0663 | 21756 | 331.4 | 43093  | 33.2  | 0.0048 |
| 2  | 280.2542 | 34449 | 291.6 | 37918  | 29.2  | 0.0081 |
| 3  | 320.1903 | 33851 | 998.7 | 129861 | 100.0 | 0.0095 |
| 4  | 320.2454 | 32339 | 919.7 | 119583 | 92.1  | 0.0099 |
| 5  | 321.1936 | 30945 | 346.6 | 45063  | 34.7  | 0.0104 |
| 6  | 321.2485 | 30217 | 261.6 | 34018  | 26.2  | 0.0106 |
| 7  | 355.2724 | 31097 | 211.2 | 27465  | 21.1  | 0.0114 |
| 8  | 373.2821 | 32436 | 255.1 | 33164  | 25.5  | 0.0115 |
| 9  | 395.2634 | 31842 | 264.2 | 34355  | 26.5  | 0.0124 |
| 10 | 402.1420 | 36940 | 323.8 | 42109  | 32.4  | 0.0109 |

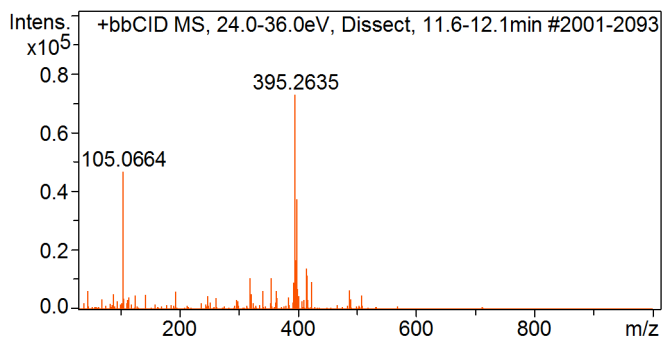

| #  | m/z      | Res.  | S/N   | I     | I %   | FWHM   |
|----|----------|-------|-------|-------|-------|--------|
| 1  | 105.0664 | 21887 | 640.3 | 46797 | 64.2  | 0.0048 |
| 2  | 320.2453 | 33692 | 146.8 | 10731 | 14.7  | 0.0095 |
| 3  | 355.2723 | 31370 | 145.5 | 10636 | 14.6  | 0.0113 |
| 4  | 393.2954 | 33511 | 126.5 | 9244  | 12.7  | 0.0117 |
| 5  | 395.2635 | 33681 | 997.1 | 72882 | 100.0 | 0.0117 |
| 6  | 396.2668 | 31047 | 228.6 | 16709 | 22.9  | 0.0128 |
| 7  | 399.1652 | 32991 | 512.5 | 37457 | 51.4  | 0.0121 |
| 8  | 415.1386 | 32349 | 190.2 | 13905 | 19.1  | 0.0128 |
| 9  | 416.1571 | 36222 | 158.0 | 11547 | 15.8  | 0.0115 |
| 10 | 424.1232 | 32859 | 127.6 | 9330  | 12.8  | 0.0129 |

# Compound Spectrum List Report

## Cmpd 104, Dissect, 11.8 min

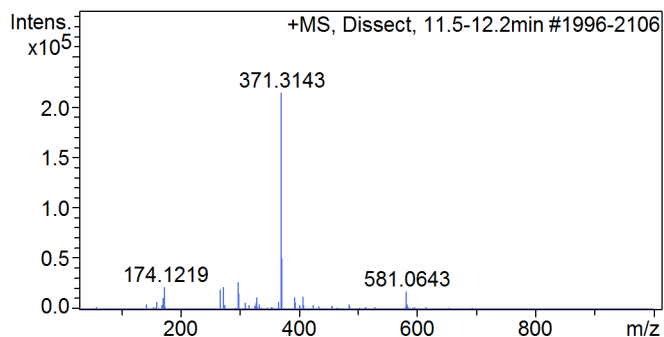

| #  | m/z      | Res.  | S/N   | I      | I %   | FWHM   |
|----|----------|-------|-------|--------|-------|--------|
| 1  | 174.1219 | 26524 | 105.7 | 22629  | 10.6  | 0.0066 |
| 2  | 268.2545 | 29985 | 92.8  | 19875  | 9.3   | 0.0089 |
| 3  | 273.1970 | 32608 | 104.0 | 22278  | 10.4  | 0.0084 |
| 4  | 298.2640 | 36170 | 127.4 | 27283  | 12.7  | 0.0082 |
| 5  | 299.2674 | 31787 | 75.5  | 16164  | 7.6   | 0.0094 |
| 6  | 329.3052 | 31090 | 58.5  | 12531  | 5.9   | 0.0106 |
| 7  | 371.3143 | 35562 | 999.8 | 214088 | 100.0 | 0.0104 |
| 8  | 372.3176 | 30961 | 235.9 | 50522  | 23.6  | 0.0120 |
| 9  | 407.1867 | 31312 | 61.2  | 13101  | 6.1   | 0.0130 |
| 10 | 581.0643 | 32676 | 83.7  | 17921  | 8.4   | 0.0178 |

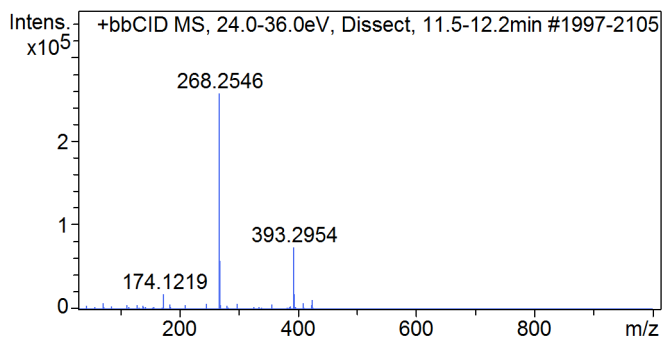

| #  | m/z      | Res.  | S/N   | I      | I %   | FWHM   |
|----|----------|-------|-------|--------|-------|--------|
| 1  | 71.0828  | 18851 | 26.8  | 6902   | 2.7   | 0.0038 |
| 2  | 174.1219 | 26613 | 72.5  | 18660  | 7.3   | 0.0065 |
| 3  | 268.2546 | 32870 | 999.9 | 257343 | 100.0 | 0.0082 |
| 4  | 269.2580 | 31446 | 226.5 | 58282  | 22.6  | 0.0086 |
| 5  | 298.2641 | 32524 | 26.2  | 6744   | 2.6   | 0.0092 |
| 6  | 393.2954 | 33344 | 289.1 | 74397  | 28.9  | 0.0118 |
| 7  | 394.3033 | 28677 | 73.3  | 18856  | 7.3   | 0.0137 |
| 8  | 409.2686 | 29638 | 29.0  | 7468   | 2.9   | 0.0138 |
| 9  | 425.1261 | 29841 | 26.7  | 6873   | 2.7   | 0.0142 |
| 10 | 425.2001 | 30029 | 44.8  | 11521  | 4.5   | 0.0142 |

## Cmpd 105, Dissect, 11.9 min

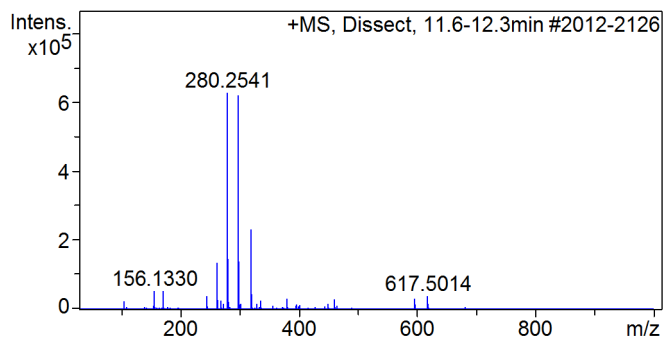

| #  | m/z      | Res.  | S/N   | I      | I %   | FWHM   |
|----|----------|-------|-------|--------|-------|--------|
| 1  | 156.1330 | 26676 | 86.8  | 54911  | 8.8   | 0.0059 |
| 2  | 172.1274 | 27403 | 86.4  | 54599  | 8.7   | 0.0063 |
| 3  | 263.2282 | 31792 | 214.3 | 135497 | 21.6  | 0.0083 |
| 4  | 280.2541 | 36269 | 992.2 | 627327 | 100.0 | 0.0077 |
| 5  | 281.2381 | 31582 | 144.9 | 91600  | 14.6  | 0.0089 |
| 6  | 281.2574 | 31421 | 231.5 | 146392 | 23.3  | 0.0090 |
| 7  | 298.2639 | 36887 | 980.9 | 620155 | 98.9  | 0.0081 |
| 8  | 299.2674 | 31829 | 220.9 | 139660 | 22.3  | 0.0094 |
| 9  | 320.1901 | 35729 | 226.4 | 143110 | 22.8  | 0.0090 |
| 10 | 320.2453 | 33757 | 365.8 | 231244 | 36.9  | 0.0095 |

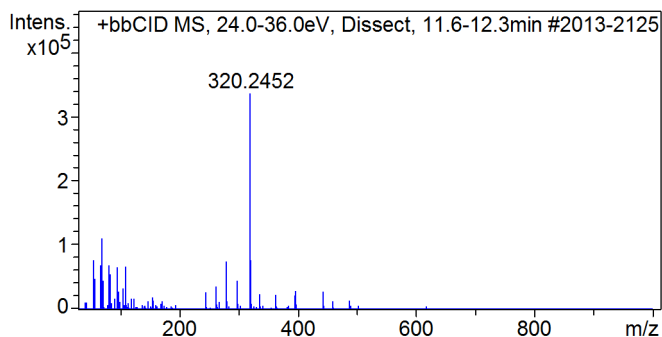

| #  | m/z      | Res.  | S/N   | I      | I %   | FWHM   |
|----|----------|-------|-------|--------|-------|--------|
| 1  | 55.0520  | 17392 | 228.0 | 76971  | 22.9  | 0.0032 |
| 2  | 67.0518  | 18144 | 203.7 | 68771  | 20.4  | 0.0037 |
| 3  | 69.0672  | 18644 | 328.6 | 110936 | 32.9  | 0.0037 |
| 4  | 81.0670  | 19696 | 204.5 | 69055  | 20.5  | 0.0041 |
| 5  | 83.0825  | 19767 | 163.4 | 55183  | 16.4  | 0.0042 |
| 6  | 95.0824  | 20755 | 194.5 | 65679  | 19.5  | 0.0046 |
| 7  | 109.0975 | 22137 | 199.1 | 67211  | 20.0  | 0.0049 |
| 8  | 280.2542 | 32730 | 221.1 | 74648  | 22.2  | 0.0086 |
| 9  | 320.2452 | 34949 | 997.5 | 336801 | 100.0 | 0.0092 |
| 10 | 321.2486 | 32502 | 228.4 | 77125  | 22.9  | 0.0099 |

**Cmpd 106, Dissect, 12.1 min**

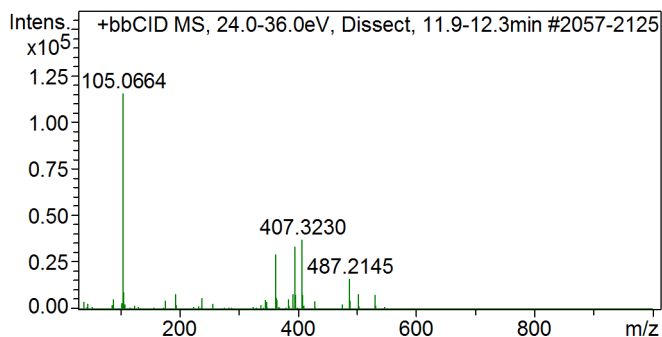

| #  | m/z      | Res.  | S/N   | I      | I %   | FWHM   |
|----|----------|-------|-------|--------|-------|--------|
| 1  | 105.0664 | 21916 | 998.9 | 115638 | 100.0 | 0.0048 |
| 2  | 106.0698 | 21024 | 80.4  | 9305   | 8.0   | 0.0050 |
| 3  | 195.1159 | 26159 | 71.5  | 8278   | 7.2   | 0.0075 |
| 4  | 363.2984 | 33047 | 254.6 | 29471  | 25.5  | 0.0110 |
| 5  | 392.3000 | 30436 | 72.5  | 8393   | 7.3   | 0.0129 |
| 6  | 395.2634 | 33028 | 289.5 | 33511  | 29.0  | 0.0120 |
| 7  | 396.2667 | 29751 | 70.4  | 8145   | 7.0   | 0.0133 |
| 8  | 407.3230 | 34906 | 322.4 | 37330  | 32.3  | 0.0117 |
| 9  | 487.2145 | 31270 | 141.9 | 16427  | 14.2  | 0.0156 |
| 10 | 503.1877 | 30823 | 70.9  | 8210   | 7.1   | 0.0163 |

Mass spectrum showing relative intensity (y-axis, scaled by  $10^4$ ) versus mass-to-charge ratio ( $m/z$ , x-axis). The spectrum displays several peaks, with the most prominent ones labeled at  $m/z$  166.9801, 338.2553, and 451.3473. The title of the plot is "+bbCID MS, 24.0-36.0eV, Dissect, 11.9-12.3min #2065-2135".

| #  | m/z      | Res.  | S/N    | I     | I %   | FWHM   |
|----|----------|-------|--------|-------|-------|--------|
| 1  | 166.9801 | 26796 | 579.8  | 18743 | 58.0  | 0.0062 |
| 2  | 167.9879 | 26865 | 528.3  | 17076 | 52.8  | 0.0063 |
| 3  | 184.0931 | 25181 | 341.1  | 11026 | 34.1  | 0.0073 |
| 4  | 229.2278 | 28250 | 281.9  | 9111  | 28.2  | 0.0081 |
| 5  | 338.2553 | 31799 | 766.1  | 24765 | 76.6  | 0.0106 |
| 6  | 346.2600 | 33086 | 338.7  | 10948 | 33.9  | 0.0105 |
| 7  | 348.2756 | 31225 | 296.1  | 9572  | 29.6  | 0.0112 |
| 8  | 407.3230 | 34173 | 683.5  | 22095 | 68.4  | 0.0119 |
| 9  | 451.3473 | 32384 | 1000.0 | 32324 | 100.0 | 0.0139 |
| 10 | 452.3506 | 32329 | 322.6  | 10427 | 32.3  | 0.0140 |

# Compound Spectrum List Report

## Cmpd 108, Dissect, 12.2 min

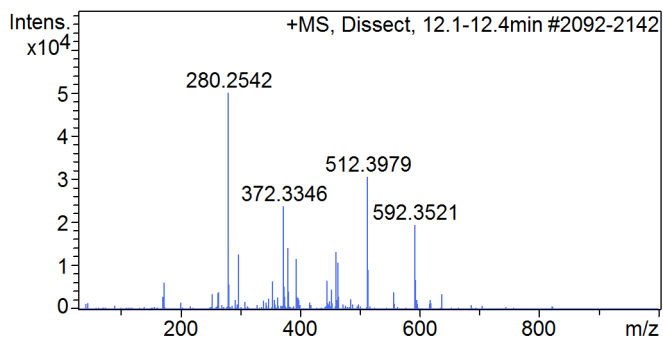

| #  | m/z      | Res.  | S/N    | I     | I %   | FWHM   |
|----|----------|-------|--------|-------|-------|--------|
| 1  | 280.2542 | 32134 | 1000.0 | 50002 | 100.0 | 0.0087 |
| 2  | 298.2641 | 30233 | 255.1  | 12757 | 25.5  | 0.0099 |
| 3  | 372.3346 | 32206 | 476.4  | 23823 | 47.6  | 0.0116 |
| 4  | 380.3240 | 29272 | 285.4  | 14269 | 28.5  | 0.0130 |
| 5  | 394.3158 | 30866 | 235.4  | 11769 | 23.5  | 0.0128 |
| 6  | 460.2778 | 31399 | 267.7  | 13385 | 26.8  | 0.0147 |
| 7  | 463.2288 | 31976 | 215.6  | 10782 | 21.6  | 0.0145 |
| 8  | 512.3979 | 31531 | 612.1  | 30606 | 61.2  | 0.0163 |
| 9  | 513.4011 | 30343 | 185.3  | 9266  | 18.5  | 0.0169 |
| 10 | 592.3521 | 31336 | 390.2  | 19512 | 39.0  | 0.0189 |

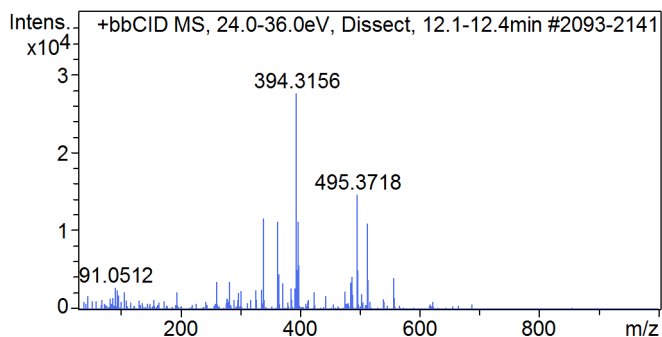

| #  | m/z      | Res.  | S/N   | I     | I %   | FWHM   |
|----|----------|-------|-------|-------|-------|--------|
| 1  | 339.1463 | 31757 | 419.8 | 11598 | 42.0  | 0.0107 |
| 2  | 362.8872 | 30952 | 184.1 | 5088  | 18.4  | 0.0117 |
| 3  | 363.2982 | 31397 | 405.9 | 11214 | 40.6  | 0.0116 |
| 4  | 394.3156 | 32787 | 999.5 | 27614 | 100.0 | 0.0120 |
| 5  | 395.2632 | 31080 | 183.0 | 5057  | 18.3  | 0.0127 |
| 6  | 397.2788 | 30761 | 407.0 | 11245 | 40.7  | 0.0129 |
| 7  | 398.2823 | 31051 | 205.7 | 5683  | 20.6  | 0.0128 |
| 8  | 495.3718 | 31271 | 530.7 | 14663 | 53.1  | 0.0158 |
| 9  | 496.3757 | 31496 | 180.5 | 4986  | 18.1  | 0.0158 |
| 10 | 512.3982 | 32378 | 396.9 | 10965 | 39.7  | 0.0158 |

## Cmpd 109, Dissect, 12.3 min

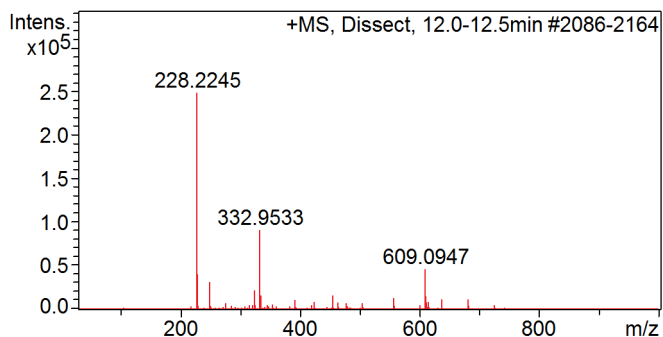

| #  | m/z      | Res.  | S/N   | I      | I %   | FWHM   |
|----|----------|-------|-------|--------|-------|--------|
| 1  | 228.2245 | 33563 | 999.1 | 248086 | 100.0 | 0.0068 |
| 2  | 229.2279 | 30999 | 163.1 | 40497  | 16.3  | 0.0074 |
| 3  | 250.2059 | 31846 | 127.4 | 31644  | 12.8  | 0.0079 |
| 4  | 324.2789 | 32767 | 89.4  | 22207  | 9.0   | 0.0099 |
| 5  | 332.9533 | 33835 | 367.9 | 91354  | 36.8  | 0.0098 |
| 6  | 333.9558 | 29282 | 57.7  | 14330  | 5.8   | 0.0114 |
| 7  | 334.9493 | 29882 | 67.7  | 16805  | 6.8   | 0.0112 |
| 8  | 455.4411 | 34522 | 66.3  | 16460  | 6.6   | 0.0132 |
| 9  | 609.0947 | 32695 | 187.3 | 46500  | 18.7  | 0.0186 |
| 10 | 610.0983 | 29843 | 62.7  | 15561  | 6.3   | 0.0204 |

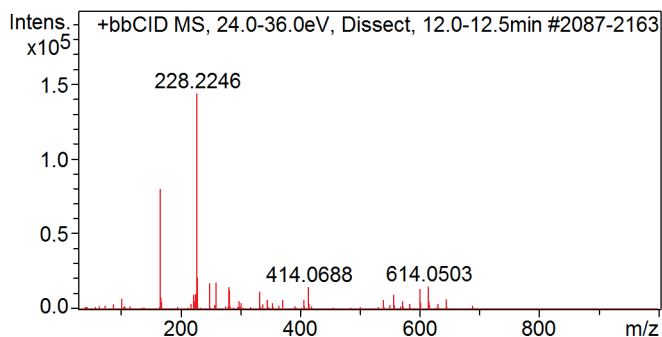

| #  | m/z      | Res.  | S/N   | I      | I %   | FWHM   |
|----|----------|-------|-------|--------|-------|--------|
| 1  | 166.9801 | 27762 | 555.7 | 80071  | 55.7  | 0.0060 |
| 2  | 228.2246 | 32814 | 996.9 | 143645 | 100.0 | 0.0070 |
| 3  | 229.2279 | 30217 | 148.6 | 21409  | 14.9  | 0.0076 |
| 4  | 250.2060 | 31151 | 121.1 | 17445  | 12.1  | 0.0080 |
| 5  | 260.0654 | 31262 | 125.7 | 18114  | 12.6  | 0.0083 |
| 6  | 282.0463 | 30410 | 104.9 | 15119  | 10.5  | 0.0093 |
| 7  | 283.2538 | 30841 | 90.1  | 12978  | 9.0   | 0.0092 |
| 8  | 414.0688 | 31585 | 105.6 | 15209  | 10.6  | 0.0131 |
| 9  | 600.4479 | 30811 | 97.2  | 14012  | 9.8   | 0.0195 |
| 10 | 614.0503 | 32274 | 106.6 | 15365  | 10.7  | 0.0190 |

# Compound Spectrum List Report

## Cmpd 110, Dissect, 12.4 min

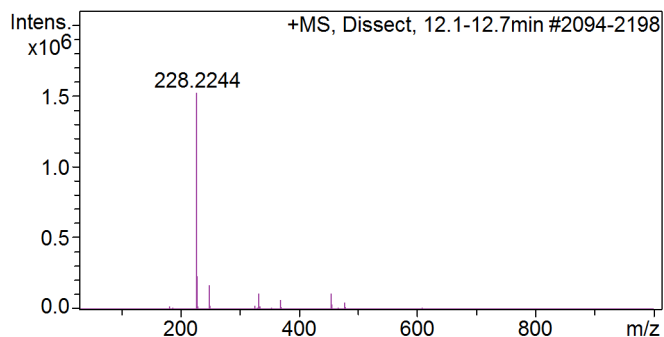

| #  | m/z      | Res.  | S/N   | I       | I %   | FWHM   |
|----|----------|-------|-------|---------|-------|--------|
| 1  | 228.2244 | 34267 | 984.2 | 1522063 | 100.0 | 0.0067 |
| 2  | 229.2278 | 31655 | 153.4 | 237313  | 15.6  | 0.0072 |
| 3  | 250.2059 | 32266 | 111.4 | 172269  | 11.3  | 0.0078 |
| 4  | 251.2090 | 28901 | 17.2  | 26600   | 1.7   | 0.0087 |
| 5  | 326.2581 | 31032 | 15.3  | 23705   | 1.6   | 0.0105 |
| 6  | 332.9533 | 33654 | 74.7  | 115505  | 7.6   | 0.0099 |
| 7  | 370.2827 | 34467 | 42.9  | 66354   | 4.4   | 0.0107 |
| 8  | 455.4412 | 34618 | 73.8  | 114136  | 7.5   | 0.0132 |
| 9  | 456.4446 | 31544 | 21.6  | 33395   | 2.2   | 0.0145 |
| 10 | 477.4223 | 32301 | 29.9  | 46231   | 3.0   | 0.0148 |

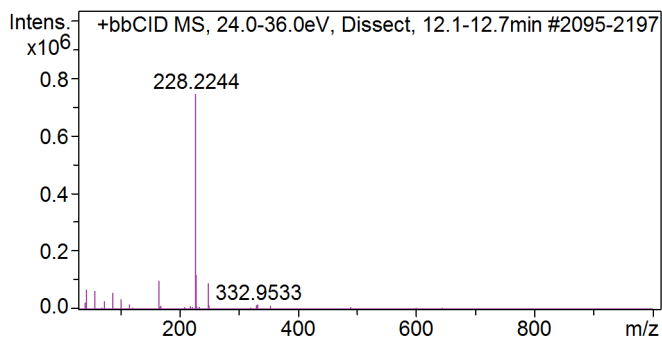

| #  | m/z      | Res.  | S/N   | I      | I %   | FWHM   |
|----|----------|-------|-------|--------|-------|--------|
| 1  | 41.0368  | 15047 | 31.2  | 23333  | 3.1   | 0.0027 |
| 2  | 43.0524  | 15385 | 92.5  | 69186  | 9.3   | 0.0028 |
| 3  | 57.0676  | 17532 | 87.5  | 65455  | 8.8   | 0.0033 |
| 4  | 74.0573  | 18765 | 37.1  | 27723  | 3.7   | 0.0039 |
| 5  | 88.0726  | 19738 | 79.2  | 59211  | 7.9   | 0.0045 |
| 6  | 102.0879 | 20755 | 48.7  | 36430  | 4.9   | 0.0049 |
| 7  | 166.9801 | 27734 | 135.1 | 101060 | 13.5  | 0.0060 |
| 8  | 228.2244 | 33500 | 998.7 | 746757 | 100.0 | 0.0068 |
| 9  | 229.2278 | 31059 | 161.4 | 120709 | 16.2  | 0.0074 |
| 10 | 250.2059 | 31515 | 123.3 | 92200  | 12.3  | 0.0079 |

## Cmpd 111, Dissect, 12.5 min

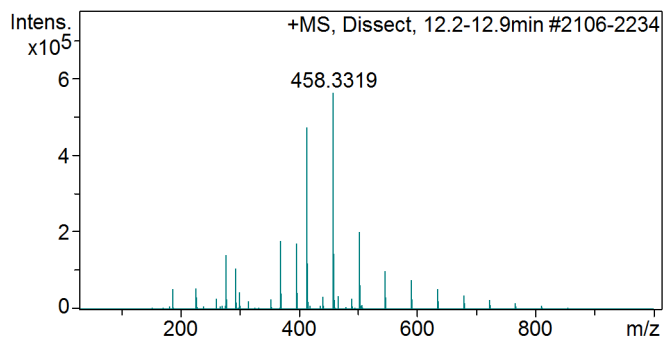

| #  | m/z      | Res.  | S/N   | I      | I %   | FWHM   |
|----|----------|-------|-------|--------|-------|--------|
| 1  | 278.2386 | 32935 | 250.3 | 141221 | 25.1  | 0.0084 |
| 2  | 294.2330 | 32617 | 189.7 | 107057 | 19.0  | 0.0090 |
| 3  | 370.2828 | 34458 | 317.0 | 178864 | 31.8  | 0.0107 |
| 4  | 397.2815 | 34289 | 304.7 | 171900 | 30.6  | 0.0116 |
| 5  | 414.3074 | 38799 | 836.5 | 471984 | 83.9  | 0.0107 |
| 6  | 415.3106 | 33575 | 213.1 | 120247 | 21.4  | 0.0124 |
| 7  | 458.3319 | 41201 | 996.8 | 562402 | 100.0 | 0.0111 |
| 8  | 459.3352 | 33401 | 258.2 | 145709 | 25.9  | 0.0138 |
| 9  | 502.3565 | 35669 | 357.1 | 201466 | 35.8  | 0.0141 |
| 10 | 546.3812 | 33324 | 178.2 | 100524 | 17.9  | 0.0164 |

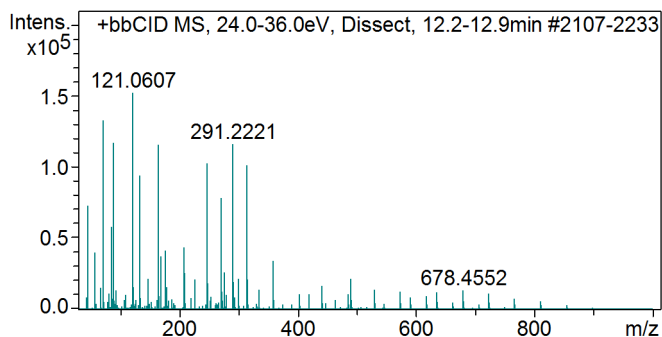

| #  | m/z      | Res.  | S/N   | I      | I %   | FWHM   |
|----|----------|-------|-------|--------|-------|--------|
| 1  | 45.0316  | 15766 | 479.5 | 72962  | 48.0  | 0.0029 |
| 2  | 71.0829  | 19128 | 871.0 | 132526 | 87.2  | 0.0037 |
| 3  | 89.0566  | 20403 | 768.6 | 116953 | 76.9  | 0.0044 |
| 4  | 121.0607 | 23478 | 999.3 | 152047 | 100.0 | 0.0052 |
| 5  | 133.0815 | 24544 | 616.4 | 93797  | 61.7  | 0.0054 |
| 6  | 165.0854 | 27326 | 759.0 | 115493 | 76.0  | 0.0060 |
| 7  | 247.1974 | 31552 | 674.4 | 102615 | 67.5  | 0.0078 |
| 8  | 271.1449 | 31534 | 515.8 | 78486  | 51.6  | 0.0086 |
| 9  | 291.2221 | 32769 | 761.7 | 115903 | 76.2  | 0.0089 |
| 10 | 315.1697 | 33854 | 664.8 | 101161 | 66.5  | 0.0093 |



# Compound Spectrum List Report

## Cmpd 112, Dissect, 12.6 min

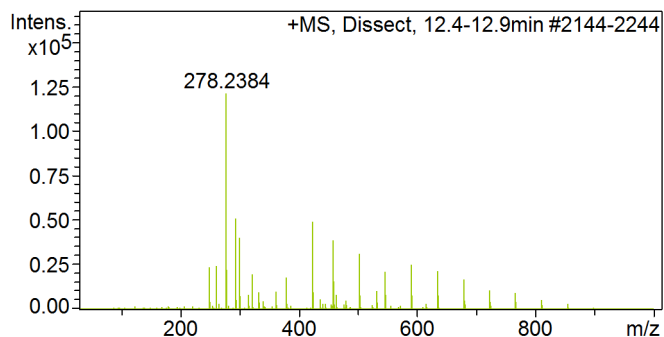

| #  | m/z      | Res.  | S/N   | I      | I %   | FWHM   |
|----|----------|-------|-------|--------|-------|--------|
| 1  | 250.0778 | 31964 | 195.6 | 23713  | 19.6  | 0.0078 |
| 2  | 261.2124 | 30070 | 203.5 | 24674  | 20.4  | 0.0087 |
| 3  | 278.2384 | 33028 | 999.9 | 121221 | 100.0 | 0.0084 |
| 4  | 279.2418 | 29844 | 183.4 | 22235  | 18.3  | 0.0094 |
| 5  | 294.2329 | 32662 | 420.7 | 51002  | 42.1  | 0.0090 |
| 6  | 300.2197 | 32411 | 331.3 | 40170  | 33.1  | 0.0093 |
| 7  | 423.3434 | 32054 | 406.7 | 49310  | 40.7  | 0.0132 |
| 8  | 458.3316 | 39132 | 322.2 | 39061  | 32.2  | 0.0117 |
| 9  | 502.3562 | 35140 | 258.7 | 31360  | 25.9  | 0.0143 |
| 10 | 590.4056 | 33443 | 208.5 | 25281  | 20.9  | 0.0177 |

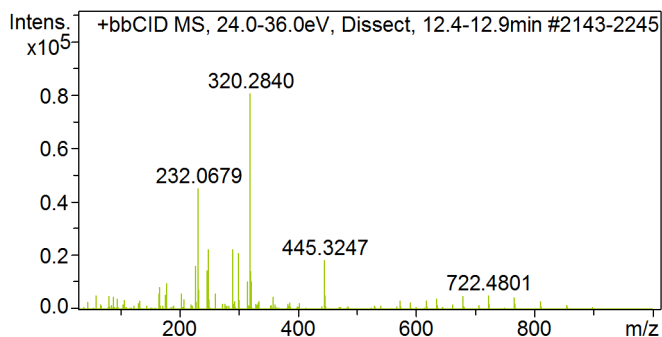

| #  | m/z      | Res.  | S/N   | I     | I %   | FWHM   |
|----|----------|-------|-------|-------|-------|--------|
| 1  | 228.2245 | 29369 | 201.8 | 16265 | 20.2  | 0.0078 |
| 2  | 232.0679 | 32420 | 559.8 | 45106 | 56.0  | 0.0072 |
| 3  | 247.1973 | 31478 | 181.4 | 14617 | 18.2  | 0.0079 |
| 4  | 250.0778 | 32018 | 279.5 | 22520 | 28.0  | 0.0078 |
| 5  | 291.2220 | 32386 | 279.7 | 22542 | 28.0  | 0.0090 |
| 6  | 300.2198 | 31472 | 260.3 | 20977 | 26.1  | 0.0095 |
| 7  | 320.2840 | 33375 | 999.3 | 80522 | 100.0 | 0.0096 |
| 8  | 321.2874 | 31430 | 179.6 | 14473 | 18.0  | 0.0102 |
| 9  | 322.1185 | 29571 | 132.7 | 10697 | 13.3  | 0.0109 |
| 10 | 445.3247 | 31905 | 229.9 | 18523 | 23.0  | 0.0140 |

## Cmpd 113, Dissect, 12.7 min

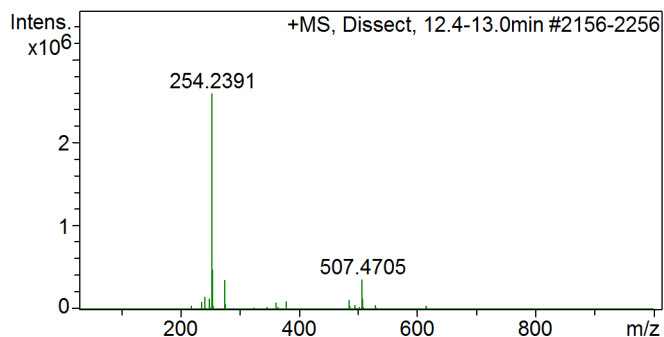

| #  | m/z      | Res.  | S/N   | I       | I %   | FWHM   |
|----|----------|-------|-------|---------|-------|--------|
| 1  | 237.2133 | 30884 | 33.3  | 88231   | 3.4   | 0.0077 |
| 2  | 242.2396 | 32287 | 59.5  | 157807  | 6.1   | 0.0075 |
| 3  | 250.0778 | 32045 | 51.4  | 136182  | 5.2   | 0.0078 |
| 4  | 254.2391 | 36054 | 979.3 | 2595248 | 100.0 | 0.0071 |
| 5  | 255.2426 | 34155 | 181.4 | 480740  | 18.5  | 0.0075 |
| 6  | 276.2203 | 34637 | 135.8 | 359900  | 13.9  | 0.0080 |
| 7  | 379.2249 | 32732 | 35.4  | 93764   | 3.6   | 0.0116 |
| 8  | 485.2726 | 35985 | 45.9  | 121528  | 4.7   | 0.0135 |
| 9  | 507.4705 | 39535 | 136.0 | 360533  | 13.9  | 0.0128 |
| 10 | 508.4736 | 35100 | 50.2  | 133080  | 5.1   | 0.0145 |

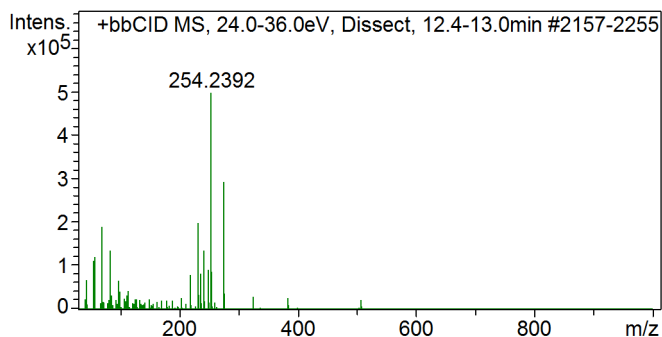

| #  | m/z      | Res.  | S/N   | I      | I %   | FWHM   |
|----|----------|-------|-------|--------|-------|--------|
| 1  | 55.0519  | 17558 | 224.7 | 112116 | 22.5  | 0.0031 |
| 2  | 57.0676  | 17583 | 242.6 | 121066 | 24.3  | 0.0032 |
| 3  | 69.0672  | 18879 | 379.6 | 189461 | 38.1  | 0.0037 |
| 4  | 83.0825  | 20245 | 273.0 | 136221 | 27.4  | 0.0041 |
| 5  | 232.0679 | 32469 | 397.7 | 198474 | 39.9  | 0.0071 |
| 6  | 242.2396 | 31902 | 272.2 | 135861 | 27.3  | 0.0076 |
| 7  | 250.0779 | 32069 | 183.1 | 91375  | 18.4  | 0.0078 |
| 8  | 254.2392 | 34227 | 996.5 | 497301 | 100.0 | 0.0074 |
| 9  | 255.2427 | 31939 | 173.8 | 86734  | 17.4  | 0.0080 |
| 10 | 276.2205 | 33843 | 585.3 | 292075 | 58.7  | 0.0082 |

# Compound Spectrum List Report

## Cmpd 114, Dissect, 12.8 min

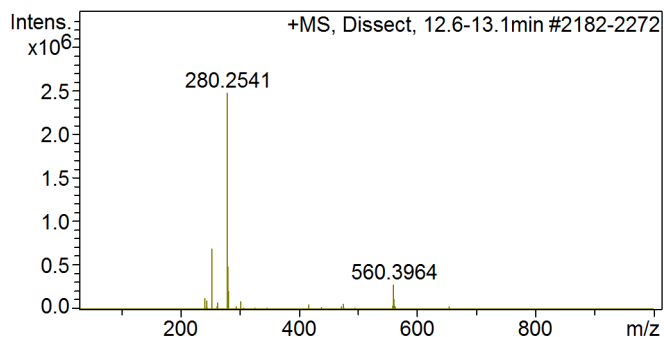

| #  | m/z      | Res.  | S/N   | I       | I %   | FWHM   |
|----|----------|-------|-------|---------|-------|--------|
| 1  | 242.2397 | 32306 | 54.4  | 134763  | 5.4   | 0.0075 |
| 2  | 245.2182 | 30012 | 38.7  | 95720   | 3.9   | 0.0082 |
| 3  | 254.2392 | 34965 | 281.3 | 696562  | 28.1  | 0.0073 |
| 4  | 280.2541 | 32648 | 999.4 | 2474817 | 100.0 | 0.0086 |
| 5  | 281.1058 | 29009 | 115.6 | 286344  | 11.6  | 0.0097 |
| 6  | 281.2379 | 29414 | 56.4  | 139662  | 5.6   | 0.0096 |
| 7  | 281.2574 | 29822 | 198.4 | 491237  | 19.8  | 0.0094 |
| 8  | 282.2685 | 25852 | 85.5  | 211596  | 8.5   | 0.0109 |
| 9  | 560.3964 | 29140 | 115.3 | 285387  | 11.5  | 0.0192 |
| 10 | 561.4004 | 28649 | 49.5  | 122511  | 5.0   | 0.0196 |

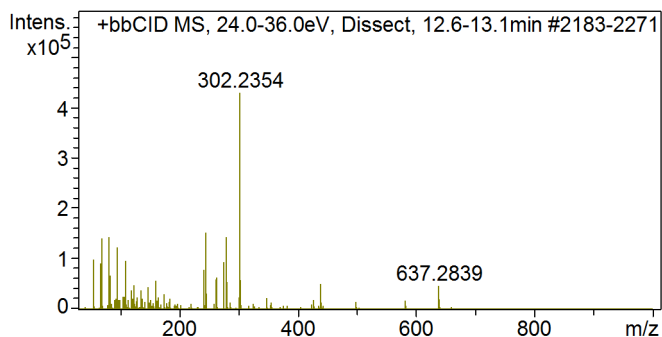

| #  | m/z      | Res.  | S/N   | I      | I %   | FWHM   |
|----|----------|-------|-------|--------|-------|--------|
| 1  | 55.0520  | 17361 | 231.6 | 99421  | 23.2  | 0.0032 |
| 2  | 67.0517  | 17886 | 212.5 | 91214  | 21.3  | 0.0037 |
| 3  | 69.0672  | 18572 | 328.0 | 140820 | 32.8  | 0.0037 |
| 4  | 81.0669  | 19352 | 334.8 | 143706 | 33.5  | 0.0042 |
| 5  | 95.0823  | 20406 | 287.5 | 123414 | 28.8  | 0.0047 |
| 6  | 109.0975 | 22052 | 226.0 | 97015  | 22.6  | 0.0049 |
| 7  | 245.2181 | 29462 | 356.3 | 152951 | 35.6  | 0.0083 |
| 8  | 276.2207 | 32536 | 219.2 | 94097  | 21.9  | 0.0085 |
| 9  | 280.2543 | 31061 | 335.8 | 144132 | 33.6  | 0.0090 |
| 10 | 302.2354 | 31010 | 999.9 | 429225 | 100.0 | 0.0097 |

## Cmpd 115, Dissect, 12.9 min

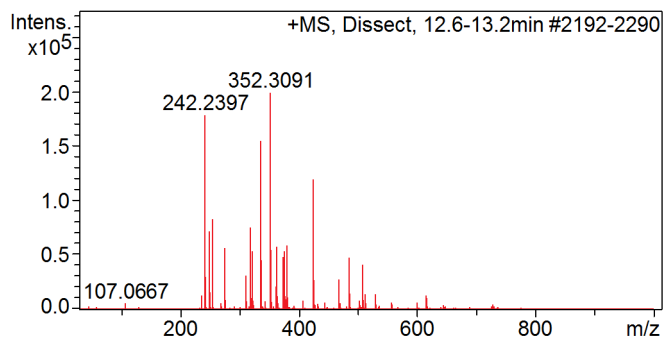

| #  | m/z      | Res.  | S/N   | I      | I %   | FWHM   |
|----|----------|-------|-------|--------|-------|--------|
| 1  | 242.2397 | 32190 | 894.3 | 177850 | 89.5  | 0.0075 |
| 2  | 250.0778 | 30456 | 360.1 | 71603  | 36.0  | 0.0082 |
| 3  | 255.2427 | 31769 | 417.9 | 83110  | 41.8  | 0.0080 |
| 4  | 275.2490 | 30869 | 283.3 | 56338  | 28.3  | 0.0089 |
| 5  | 319.2738 | 31104 | 379.3 | 75429  | 38.0  | 0.0103 |
| 6  | 336.3148 | 33520 | 777.6 | 154645 | 77.8  | 0.0100 |
| 7  | 352.3091 | 34402 | 999.4 | 198742 | 100.0 | 0.0102 |
| 8  | 363.2981 | 31574 | 291.1 | 57896  | 29.1  | 0.0115 |
| 9  | 380.3241 | 31463 | 294.6 | 58589  | 29.5  | 0.0121 |
| 10 | 425.3519 | 30235 | 599.5 | 119214 | 60.0  | 0.0141 |

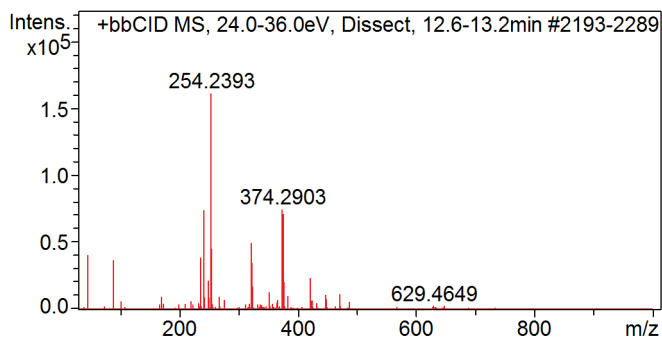

| #  | m/z      | Res.  | S/N   | I      | I %   | FWHM   |
|----|----------|-------|-------|--------|-------|--------|
| 1  | 45.0316  | 15769 | 253.0 | 40753  | 25.3  | 0.0029 |
| 2  | 89.0566  | 19768 | 229.3 | 36938  | 22.9  | 0.0045 |
| 3  | 237.0831 | 29449 | 240.2 | 38704  | 24.0  | 0.0081 |
| 4  | 242.2397 | 31621 | 459.1 | 73967  | 45.9  | 0.0077 |
| 5  | 254.2393 | 31999 | 999.8 | 161064 | 100.0 | 0.0079 |
| 6  | 255.0930 | 30152 | 283.6 | 45689  | 28.4  | 0.0085 |
| 7  | 322.0826 | 29419 | 307.8 | 49593  | 30.8  | 0.0109 |
| 8  | 323.2284 | 21628 | 218.1 | 35128  | 21.8  | 0.0149 |
| 9  | 374.2903 | 33826 | 462.5 | 74507  | 46.3  | 0.0111 |
| 10 | 376.3058 | 32659 | 441.8 | 71181  | 44.2  | 0.0115 |

# Compound Spectrum List Report

## Cmpd 116, Dissect, 13.0 min

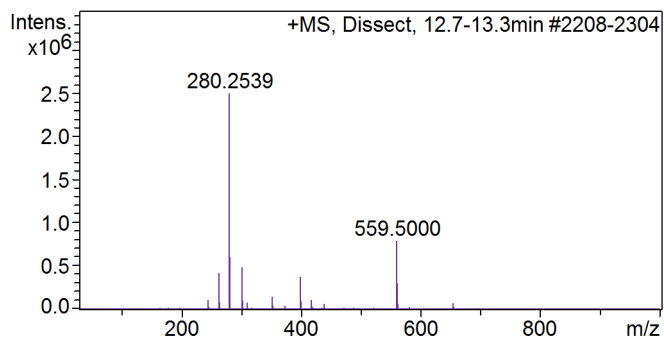

| #  | m/z      | Res.  | S/N   | I       | I %   | FWHM   |
|----|----------|-------|-------|---------|-------|--------|
| 1  | 245.2180 | 31002 | 46.4  | 116331  | 4.7   | 0.0079 |
| 2  | 263.2280 | 34274 | 170.3 | 427244  | 17.1  | 0.0077 |
| 3  | 280.2539 | 35491 | 996.9 | 2501729 | 100.0 | 0.0079 |
| 4  | 281.2572 | 35372 | 242.4 | 608229  | 24.3  | 0.0080 |
| 5  | 302.2351 | 36472 | 194.9 | 489103  | 19.6  | 0.0083 |
| 6  | 352.3090 | 34611 | 61.6  | 154582  | 6.2   | 0.0102 |
| 7  | 399.3443 | 38370 | 150.8 | 378505  | 15.1  | 0.0104 |
| 8  | 417.2702 | 33120 | 46.6  | 116999  | 4.7   | 0.0126 |
| 9  | 559.5000 | 44792 | 317.0 | 795382  | 31.8  | 0.0125 |
| 10 | 560.5032 | 39940 | 123.3 | 309459  | 12.4  | 0.0140 |

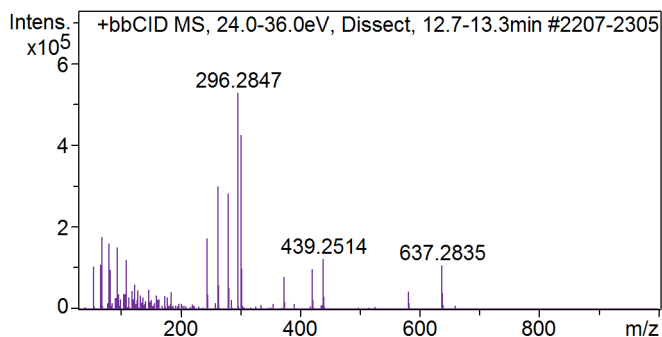

| #  | m/z      | Res.  | S/N   | I      | I %   | FWHM   |
|----|----------|-------|-------|--------|-------|--------|
| 1  | 69.0672  | 19003 | 333.2 | 176296 | 33.4  | 0.0036 |
| 2  | 81.0669  | 20309 | 303.2 | 160452 | 30.4  | 0.0040 |
| 3  | 95.0822  | 21402 | 285.6 | 151107 | 28.6  | 0.0044 |
| 4  | 109.0974 | 22482 | 229.0 | 121193 | 23.0  | 0.0049 |
| 5  | 245.2180 | 32384 | 329.0 | 174109 | 33.0  | 0.0076 |
| 6  | 263.2281 | 33845 | 566.8 | 299926 | 56.8  | 0.0078 |
| 7  | 280.2540 | 34541 | 532.8 | 281927 | 53.4  | 0.0081 |
| 8  | 296.2847 | 35482 | 997.9 | 528067 | 100.0 | 0.0084 |
| 9  | 302.2351 | 35861 | 800.9 | 423834 | 80.3  | 0.0084 |
| 10 | 439.2514 | 34131 | 234.0 | 123841 | 23.5  | 0.0129 |

## Cmpd 117, Dissect, 13.1 min

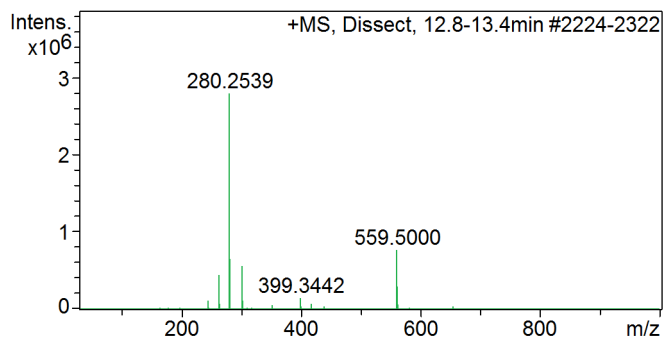

| #  | m/z      | Res.  | S/N   | I       | I %   | FWHM   |
|----|----------|-------|-------|---------|-------|--------|
| 1  | 245.2179 | 31181 | 40.0  | 113039  | 4.0   | 0.0079 |
| 2  | 263.2280 | 34590 | 158.9 | 448893  | 16.0  | 0.0076 |
| 3  | 264.2313 | 31212 | 26.2  | 73951   | 2.6   | 0.0085 |
| 4  | 280.2539 | 35621 | 990.6 | 2798296 | 100.0 | 0.0079 |
| 5  | 281.2572 | 35714 | 231.5 | 653935  | 23.4  | 0.0079 |
| 6  | 302.2351 | 37014 | 200.5 | 566275  | 20.2  | 0.0082 |
| 7  | 303.2385 | 32444 | 39.1  | 110413  | 3.9   | 0.0093 |
| 8  | 399.3442 | 36433 | 52.9  | 149289  | 5.3   | 0.0110 |
| 9  | 559.5000 | 44961 | 272.8 | 770727  | 27.5  | 0.0124 |
| 10 | 560.5033 | 39960 | 107.8 | 304572  | 10.9  | 0.0140 |

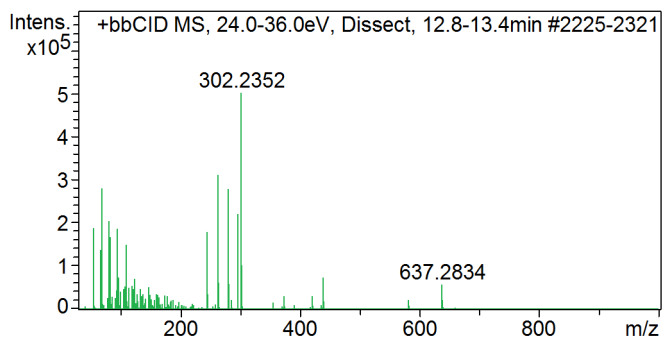

| #  | m/z      | Res.  | S/N   | I      | I %   | FWHM   |
|----|----------|-------|-------|--------|-------|--------|
| 1  | 55.0520  | 17694 | 375.4 | 189045 | 37.7  | 0.0031 |
| 2  | 69.0672  | 19137 | 556.2 | 280080 | 55.8  | 0.0036 |
| 3  | 81.0669  | 20448 | 405.7 | 204281 | 40.7  | 0.0040 |
| 4  | 83.0824  | 20451 | 333.2 | 167778 | 33.5  | 0.0041 |
| 5  | 95.0822  | 21569 | 372.4 | 187537 | 37.4  | 0.0044 |
| 6  | 245.2180 | 32577 | 358.2 | 180372 | 36.0  | 0.0075 |
| 7  | 263.2281 | 33999 | 617.5 | 310929 | 62.0  | 0.0077 |
| 8  | 280.2540 | 34751 | 554.3 | 279099 | 55.6  | 0.0081 |
| 9  | 296.2848 | 34542 | 439.4 | 221244 | 44.1  | 0.0086 |
| 10 | 302.2352 | 36244 | 996.0 | 501527 | 100.0 | 0.0083 |

# Compound Spectrum List Report

## Cmpd 118, Dissect, 13.2 min

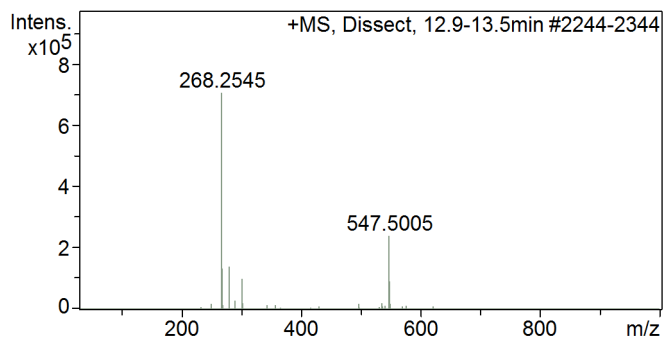

| #  | m/z      | Res.  | S/N   | I      | I %   | FWHM   |
|----|----------|-------|-------|--------|-------|--------|
| 1  | 268.2545 | 35750 | 995.9 | 705614 | 100.0 | 0.0075 |
| 2  | 269.2579 | 32303 | 190.4 | 134865 | 19.1  | 0.0083 |
| 3  | 280.2539 | 37067 | 196.9 | 139504 | 19.8  | 0.0076 |
| 4  | 290.2358 | 32333 | 40.7  | 28846  | 4.1   | 0.0090 |
| 5  | 302.2353 | 35964 | 142.7 | 101094 | 14.3  | 0.0084 |
| 6  | 303.2387 | 31747 | 26.6  | 18871  | 2.7   | 0.0096 |
| 7  | 535.5009 | 31791 | 28.1  | 19875  | 2.8   | 0.0168 |
| 8  | 547.5005 | 36366 | 337.9 | 239432 | 33.9  | 0.0151 |
| 9  | 548.5038 | 32467 | 131.4 | 93088  | 13.2  | 0.0169 |
| 10 | 549.5072 | 30120 | 26.3  | 18629  | 2.6   | 0.0182 |

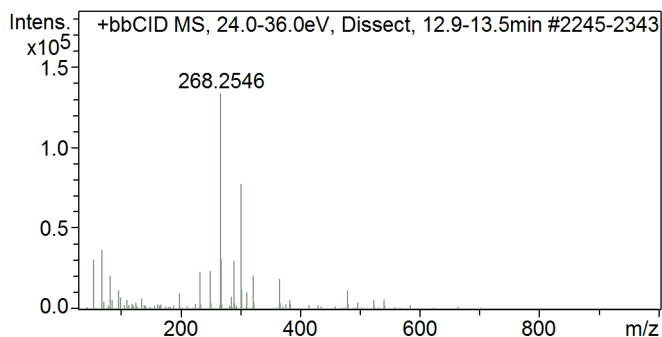

| #  | m/z      | Res.  | S/N   | I      | I %   | FWHM   |
|----|----------|-------|-------|--------|-------|--------|
| 1  | 55.0520  | 17524 | 232.1 | 31133  | 23.3  | 0.0031 |
| 2  | 69.0672  | 18949 | 273.8 | 36730  | 27.5  | 0.0036 |
| 3  | 83.0825  | 20151 | 157.6 | 21143  | 15.8  | 0.0041 |
| 4  | 233.2187 | 29239 | 175.6 | 23554  | 17.6  | 0.0080 |
| 5  | 251.2286 | 29633 | 178.6 | 23964  | 17.9  | 0.0085 |
| 6  | 268.2546 | 32019 | 997.3 | 133803 | 100.0 | 0.0084 |
| 7  | 269.2580 | 30201 | 234.7 | 31493  | 23.5  | 0.0089 |
| 8  | 290.2359 | 31964 | 226.5 | 30393  | 22.7  | 0.0091 |
| 9  | 302.2353 | 35108 | 579.1 | 77692  | 58.1  | 0.0086 |
| 10 | 322.2995 | 37698 | 157.4 | 21118  | 15.8  | 0.0085 |

## Cmpd 119, Dissect, 13.2 min

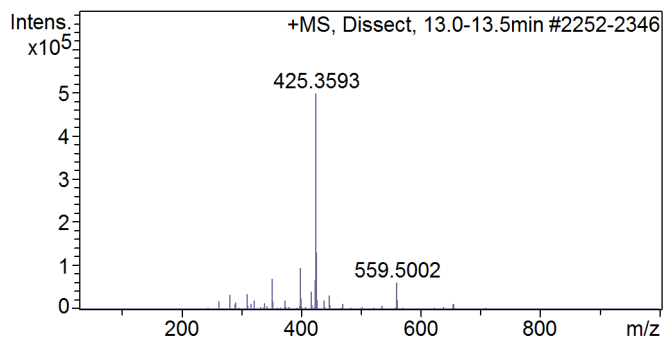

| #  | m/z      | Res.  | S/N   | I      | I %   | FWHM   |
|----|----------|-------|-------|--------|-------|--------|
| 1  | 281.2574 | 32766 | 68.7  | 34377  | 6.9   | 0.0086 |
| 2  | 311.1538 | 30114 | 73.3  | 36662  | 7.3   | 0.0103 |
| 3  | 352.3091 | 30885 | 143.2 | 71680  | 14.4  | 0.0114 |
| 4  | 399.1641 | 30514 | 91.9  | 45968  | 9.2   | 0.0131 |
| 5  | 399.3443 | 31397 | 191.6 | 95877  | 19.2  | 0.0127 |
| 6  | 417.2702 | 30898 | 84.2  | 42134  | 8.4   | 0.0135 |
| 7  | 424.2491 | 33277 | 135.5 | 67821  | 13.6  | 0.0127 |
| 8  | 425.3593 | 40428 | 997.3 | 499037 | 100.0 | 0.0105 |
| 9  | 426.3625 | 34942 | 262.8 | 131499 | 26.4  | 0.0122 |
| 10 | 559.5002 | 35891 | 125.0 | 62562  | 12.5  | 0.0156 |

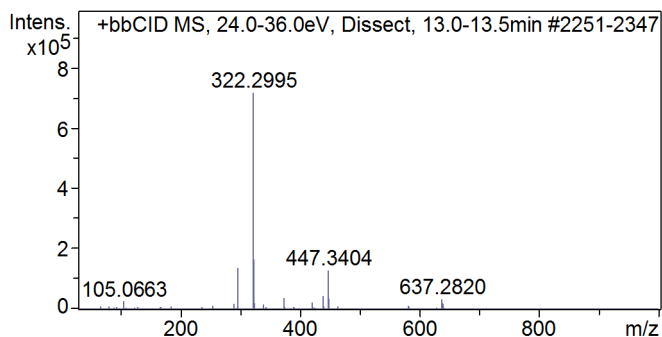

| #  | m/z      | Res.  | S/N   | I      | I %   | FWHM   |
|----|----------|-------|-------|--------|-------|--------|
| 1  | 296.2484 | 30086 | 112.9 | 81103  | 11.3  | 0.0098 |
| 2  | 296.2847 | 30485 | 192.1 | 138030 | 19.2  | 0.0097 |
| 3  | 297.2877 | 27892 | 46.4  | 33353  | 4.7   | 0.0107 |
| 4  | 322.2995 | 37800 | 998.2 | 717261 | 100.0 | 0.0085 |
| 5  | 323.3030 | 32897 | 231.4 | 166302 | 23.2  | 0.0098 |
| 6  | 374.2901 | 32251 | 53.3  | 38331  | 5.3   | 0.0116 |
| 7  | 439.2515 | 31402 | 62.1  | 44610  | 6.2   | 0.0140 |
| 8  | 447.3404 | 34897 | 180.3 | 129525 | 18.1  | 0.0128 |
| 9  | 448.3436 | 31210 | 50.3  | 36136  | 5.0   | 0.0144 |
| 10 | 637.2820 | 30757 | 49.2  | 35381  | 4.9   | 0.0207 |

# Compound Spectrum List Report

## Cmpd 120, Dissect, 13.3 min

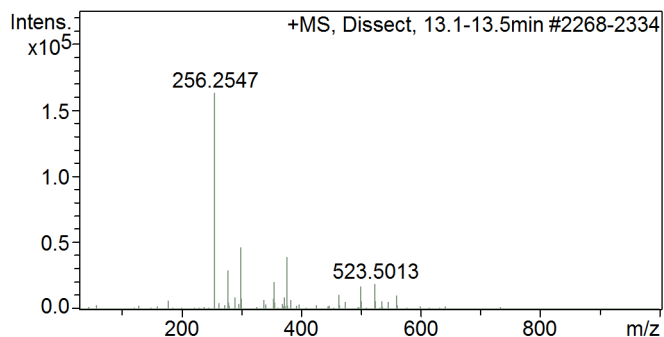

| #  | m/z      | Res.  | S/N   | I      | I %   | FWHM   |
|----|----------|-------|-------|--------|-------|--------|
| 1  | 256.2547 | 31833 | 997.9 | 163126 | 100.0 | 0.0080 |
| 2  | 278.2360 | 33060 | 180.4 | 29484  | 18.1  | 0.0084 |
| 3  | 290.2358 | 32109 | 57.6  | 9420   | 5.8   | 0.0090 |
| 4  | 300.2797 | 31638 | 287.5 | 46997  | 28.8  | 0.0095 |
| 5  | 355.2724 | 30701 | 128.8 | 21057  | 12.9  | 0.0116 |
| 6  | 377.2533 | 32384 | 243.3 | 39774  | 24.4  | 0.0116 |
| 7  | 463.2287 | 31539 | 69.6  | 11374  | 7.0   | 0.0147 |
| 8  | 500.3770 | 30817 | 106.1 | 17337  | 10.6  | 0.0162 |
| 9  | 523.5013 | 31221 | 119.4 | 19510  | 12.0  | 0.0168 |
| 10 | 559.5001 | 31588 | 65.8  | 10758  | 6.6   | 0.0177 |

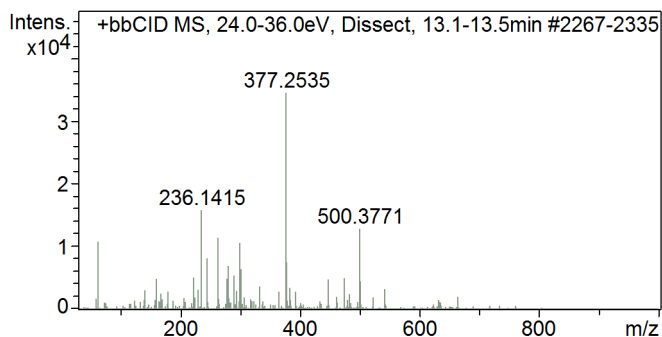

| #  | m/z      | Res.  | S/N   | I     | I %   | FWHM   |
|----|----------|-------|-------|-------|-------|--------|
| 1  | 62.0577  | 17444 | 313.1 | 10808 | 31.3  | 0.0036 |
| 2  | 236.1415 | 29393 | 459.3 | 15854 | 46.0  | 0.0080 |
| 3  | 245.2181 | 29407 | 237.9 | 8211  | 23.8  | 0.0083 |
| 4  | 263.2282 | 30513 | 330.7 | 11415 | 33.1  | 0.0086 |
| 5  | 280.2542 | 31168 | 201.8 | 6966  | 20.2  | 0.0090 |
| 6  | 300.2795 | 30754 | 308.7 | 10655 | 30.9  | 0.0098 |
| 7  | 302.2355 | 32636 | 186.7 | 6443  | 18.7  | 0.0093 |
| 8  | 377.2535 | 31801 | 999.4 | 34496 | 100.0 | 0.0119 |
| 9  | 378.2566 | 29395 | 219.1 | 7563  | 21.9  | 0.0129 |
| 10 | 500.3771 | 31355 | 372.5 | 12859 | 37.3  | 0.0160 |

## Cmpd 121, Dissect, 13.4 min

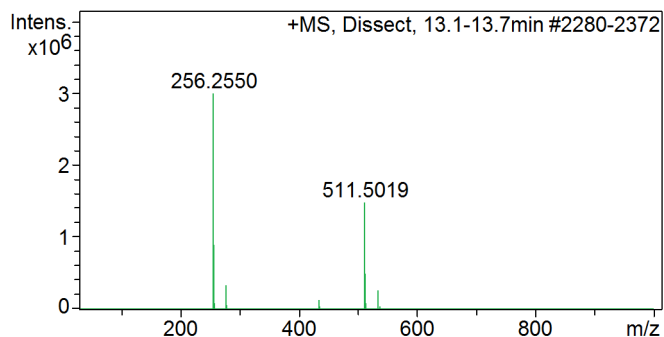

| #  | m/z      | Res.  | S/N   | I       | I %   | FWHM   |
|----|----------|-------|-------|---------|-------|--------|
| 1  | 256.2550 | 22941 | 961.3 | 3003822 | 100.0 | 0.0112 |
| 2  | 257.2581 | 35734 | 287.1 | 896962  | 29.9  | 0.0072 |
| 3  | 258.2612 | 30265 | 26.3  | 82270   | 2.7   | 0.0085 |
| 4  | 278.2360 | 35117 | 109.3 | 341417  | 11.4  | 0.0079 |
| 5  | 434.1567 | 35999 | 41.4  | 129426  | 4.3   | 0.0121 |
| 6  | 511.5019 | 48125 | 474.6 | 1482938 | 49.4  | 0.0106 |
| 7  | 512.5051 | 43563 | 159.5 | 498303  | 16.6  | 0.0118 |
| 8  | 513.5083 | 33802 | 28.3  | 88430   | 2.9   | 0.0152 |
| 9  | 533.4831 | 40017 | 85.3  | 266389  | 8.9   | 0.0133 |
| 10 | 534.4862 | 34756 | 31.3  | 97722   | 3.3   | 0.0154 |

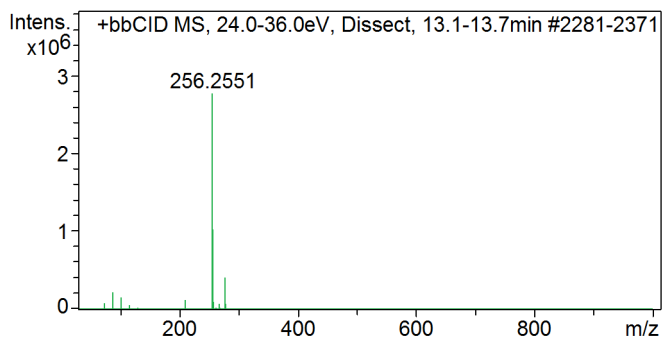

| #  | m/z      | Res.  | S/N   | I       | I %   | FWHM   |
|----|----------|-------|-------|---------|-------|--------|
| 1  | 74.0573  | 19146 | 28.6  | 79664   | 2.9   | 0.0039 |
| 2  | 88.0725  | 21057 | 80.6  | 224680  | 8.1   | 0.0042 |
| 3  | 102.0878 | 21614 | 57.3  | 159761  | 5.7   | 0.0047 |
| 4  | 211.1158 | 31324 | 43.7  | 121957  | 4.4   | 0.0067 |
| 5  | 256.2551 | 20837 | 996.7 | 2778852 | 100.0 | 0.0123 |
| 6  | 257.2581 | 35915 | 368.9 | 1028505 | 37.0  | 0.0072 |
| 7  | 258.2612 | 30864 | 34.3  | 95748   | 3.4   | 0.0084 |
| 8  | 268.1842 | 32664 | 24.4  | 68020   | 2.4   | 0.0082 |
| 9  | 278.2360 | 35826 | 147.6 | 411596  | 14.8  | 0.0078 |
| 10 | 279.2393 | 31519 | 24.2  | 67584   | 2.4   | 0.0089 |

# Compound Spectrum List Report

## Cmpd 122, Dissect, 13.6 min

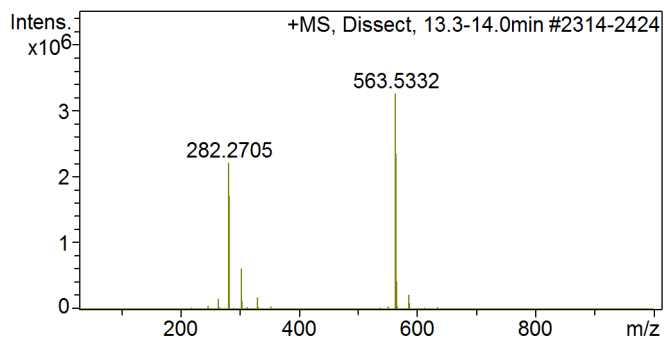

| #  | m/z      | Res.  | S/N   | I       | I %   | FWHM   |
|----|----------|-------|-------|---------|-------|--------|
| 1  | 265.2436 | 33196 | 51.1  | 168390  | 5.2   | 0.0080 |
| 2  | 282.2705 | 15377 | 670.8 | 2210900 | 67.7  | 0.0184 |
| 3  | 283.2727 | 37918 | 518.9 | 1710248 | 52.4  | 0.0075 |
| 4  | 304.2506 | 38084 | 188.4 | 620762  | 19.0  | 0.0080 |
| 5  | 305.2540 | 32389 | 36.6  | 120485  | 3.7   | 0.0094 |
| 6  | 331.2729 | 35154 | 55.8  | 183796  | 5.6   | 0.0094 |
| 7  | 563.5332 | 21794 | 990.6 | 3264698 | 100.0 | 0.0259 |
| 8  | 564.5347 | 49643 | 712.1 | 2346973 | 71.9  | 0.0114 |
| 9  | 565.5378 | 44256 | 130.5 | 430148  | 13.2  | 0.0128 |
| 10 | 585.5124 | 39859 | 68.5  | 225695  | 6.9   | 0.0147 |

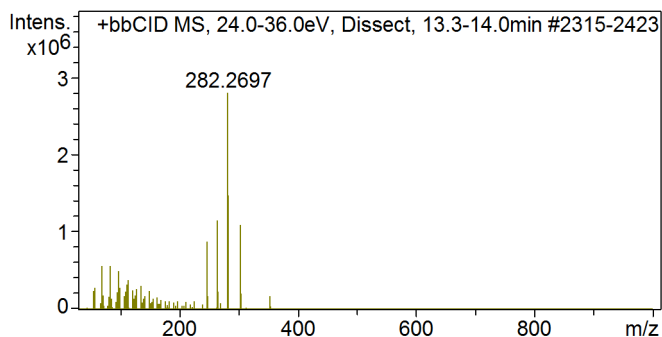

| #  | m/z      | Res.  | S/N   | I       | I %   | FWHM   |
|----|----------|-------|-------|---------|-------|--------|
| 1  | 69.0672  | 19429 | 201.0 | 567020  | 20.2  | 0.0036 |
| 2  | 83.0824  | 21293 | 201.5 | 568444  | 20.3  | 0.0039 |
| 3  | 97.0977  | 22746 | 177.0 | 499437  | 17.8  | 0.0043 |
| 4  | 111.1130 | 23552 | 116.7 | 329414  | 11.8  | 0.0047 |
| 5  | 114.0874 | 23757 | 137.4 | 387645  | 13.8  | 0.0048 |
| 6  | 247.2335 | 35724 | 310.8 | 876977  | 31.3  | 0.0069 |
| 7  | 265.2435 | 36693 | 408.9 | 1153751 | 41.2  | 0.0072 |
| 8  | 282.2697 | 18140 | 993.2 | 2802472 | 100.0 | 0.0156 |
| 9  | 283.2727 | 37968 | 521.5 | 1471629 | 52.5  | 0.0075 |
| 10 | 304.2506 | 39076 | 387.0 | 1092090 | 39.0  | 0.0078 |

## Cmpd 123, Dissect, 13.8 min

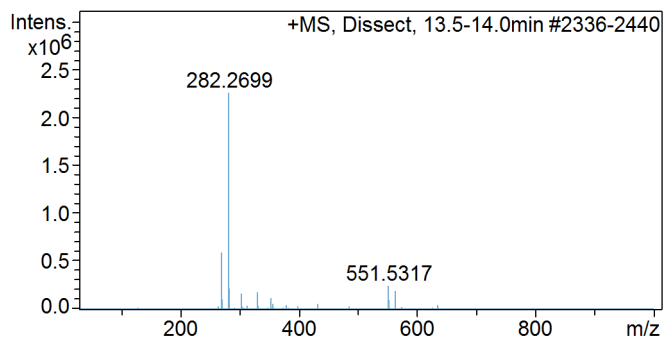

| #  | m/z      | Res.  | S/N   | I       | I %   | FWHM   |
|----|----------|-------|-------|---------|-------|--------|
| 1  | 270.2700 | 34170 | 260.4 | 594283  | 26.3  | 0.0079 |
| 2  | 271.2734 | 30784 | 47.9  | 109380  | 4.8   | 0.0088 |
| 3  | 282.2699 | 22976 | 988.5 | 2255915 | 100.0 | 0.0123 |
| 4  | 283.2728 | 36970 | 96.2  | 219565  | 9.7   | 0.0077 |
| 5  | 304.2507 | 36386 | 73.7  | 168147  | 7.5   | 0.0084 |
| 6  | 331.2728 | 33897 | 78.9  | 180034  | 8.0   | 0.0098 |
| 7  | 353.2542 | 33129 | 54.2  | 123704  | 5.5   | 0.0107 |
| 8  | 551.5317 | 34928 | 110.6 | 252354  | 11.2  | 0.0158 |
| 9  | 552.5348 | 32016 | 45.4  | 103539  | 4.6   | 0.0173 |
| 10 | 563.5320 | 30150 | 85.2  | 194540  | 8.6   | 0.0187 |

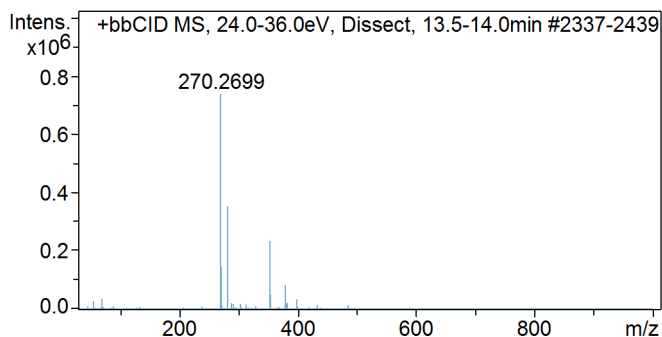

| #  | m/z      | Res.  | S/N   | I      | I %   | FWHM   |
|----|----------|-------|-------|--------|-------|--------|
| 1  | 55.0519  | 17591 | 37.6  | 27826  | 3.8   | 0.0031 |
| 2  | 69.0672  | 19166 | 50.5  | 37394  | 5.1   | 0.0036 |
| 3  | 270.2699 | 34826 | 997.7 | 739094 | 100.0 | 0.0078 |
| 4  | 271.2734 | 31805 | 198.7 | 147227 | 19.9  | 0.0085 |
| 5  | 282.2696 | 24568 | 478.1 | 354159 | 47.9  | 0.0115 |
| 6  | 353.2542 | 36188 | 317.3 | 235028 | 31.8  | 0.0098 |
| 7  | 354.2576 | 31673 | 68.3  | 50603  | 6.8   | 0.0112 |
| 8  | 379.2690 | 33638 | 114.3 | 84654  | 11.5  | 0.0113 |
| 9  | 383.1910 | 32307 | 31.5  | 23332  | 3.2   | 0.0119 |
| 10 | 399.3120 | 30837 | 49.8  | 36879  | 5.0   | 0.0129 |

# Compound Spectrum List Report

## Cmpd 124, Dissect, 13.9 min

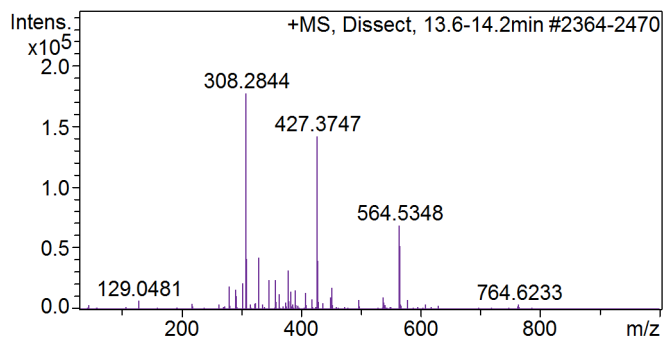

| #  | m/z      | Res.  | S/N   | I      | I %   | FWHM   |
|----|----------|-------|-------|--------|-------|--------|
| 1  | 308.2844 | 32951 | 999.4 | 177499 | 100.0 | 0.0094 |
| 2  | 309.2878 | 30993 | 235.2 | 41775  | 23.5  | 0.0100 |
| 3  | 330.2656 | 30866 | 240.7 | 42747  | 24.1  | 0.0107 |
| 4  | 347.3037 | 30478 | 137.3 | 24377  | 13.7  | 0.0114 |
| 5  | 357.2879 | 32914 | 136.6 | 24263  | 13.7  | 0.0109 |
| 6  | 379.2690 | 32324 | 181.1 | 32169  | 18.1  | 0.0117 |
| 7  | 427.3747 | 33935 | 798.7 | 141843 | 79.9  | 0.0126 |
| 8  | 428.3778 | 31346 | 225.0 | 39951  | 22.5  | 0.0137 |
| 9  | 564.5348 | 33178 | 386.5 | 68636  | 38.7  | 0.0170 |
| 10 | 565.5449 | 28587 | 292.6 | 51964  | 29.3  | 0.0198 |

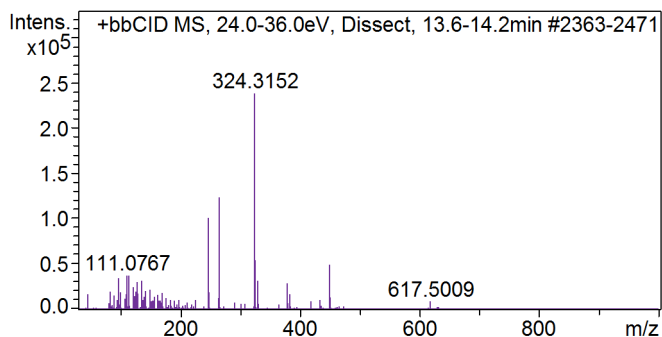

| #  | m/z      | Res.  | S/N   | I      | I %   | FWHM   |
|----|----------|-------|-------|--------|-------|--------|
| 1  | 97.0979  | 19965 | 147.4 | 35135  | 14.8  | 0.0049 |
| 2  | 111.0767 | 21088 | 157.6 | 37567  | 15.8  | 0.0053 |
| 3  | 111.1131 | 21596 | 154.8 | 36888  | 15.5  | 0.0051 |
| 4  | 114.0876 | 21872 | 156.7 | 37342  | 15.7  | 0.0052 |
| 5  | 135.1122 | 24220 | 135.7 | 32332  | 13.6  | 0.0056 |
| 6  | 247.2338 | 30128 | 424.7 | 101213 | 42.5  | 0.0082 |
| 7  | 265.2437 | 30523 | 519.5 | 123801 | 52.0  | 0.0087 |
| 8  | 324.3152 | 34285 | 999.4 | 238182 | 100.0 | 0.0095 |
| 9  | 325.3186 | 31180 | 229.1 | 54595  | 22.9  | 0.0104 |
| 10 | 449.3566 | 31642 | 207.7 | 49504  | 20.8  | 0.0142 |

## Cmpd 125, Dissect, 14.0 min

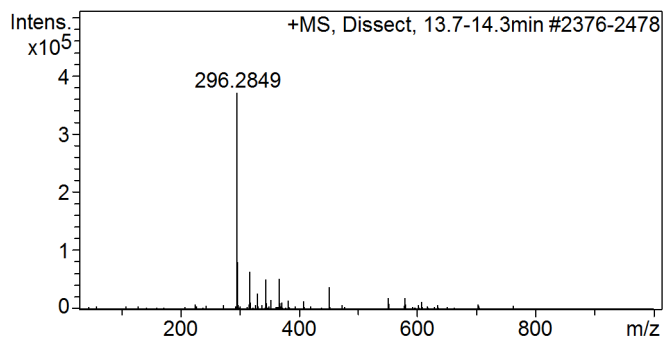

| #  | m/z      | Res.  | S/N   | I      | I %   | FWHM   |
|----|----------|-------|-------|--------|-------|--------|
| 1  | 296.2485 | 30215 | 49.9  | 18557  | 5.0   | 0.0098 |
| 2  | 296.2849 | 34438 | 997.4 | 370732 | 100.0 | 0.0086 |
| 3  | 297.2883 | 31420 | 217.7 | 80911  | 21.8  | 0.0095 |
| 4  | 318.2662 | 32312 | 173.4 | 64465  | 17.4  | 0.0098 |
| 5  | 331.2720 | 28528 | 73.7  | 27406  | 7.4   | 0.0116 |
| 6  | 345.2885 | 32514 | 138.5 | 51469  | 13.9  | 0.0106 |
| 7  | 367.2695 | 32893 | 142.9 | 53105  | 14.3  | 0.0112 |
| 8  | 451.3737 | 31972 | 103.8 | 38589  | 10.4  | 0.0141 |
| 9  | 551.5308 | 30551 | 53.5  | 19869  | 5.4   | 0.0181 |
| 10 | 579.5619 | 31431 | 55.1  | 20489  | 5.5   | 0.0184 |

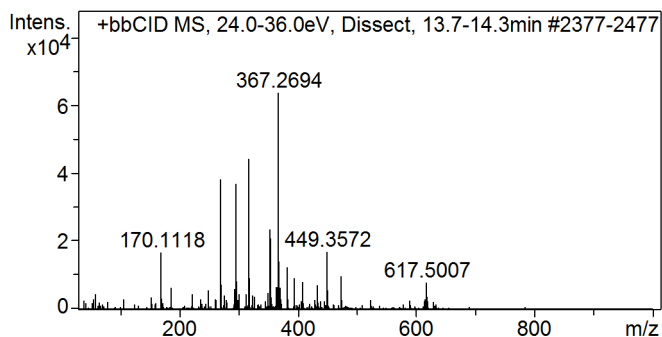

| #  | m/z      | Res.  | S/N   | I     | I %   | FWHM   |
|----|----------|-------|-------|-------|-------|--------|
| 1  | 170.1118 | 26645 | 263.1 | 16754 | 26.3  | 0.0064 |
| 2  | 270.2700 | 32293 | 598.7 | 38125 | 59.9  | 0.0084 |
| 3  | 296.2482 | 30938 | 270.6 | 17232 | 27.1  | 0.0096 |
| 4  | 296.2848 | 31341 | 578.9 | 36860 | 57.9  | 0.0095 |
| 5  | 318.2660 | 32345 | 693.3 | 44149 | 69.3  | 0.0098 |
| 6  | 353.2544 | 29625 | 370.5 | 23594 | 37.1  | 0.0119 |
| 7  | 355.0579 | 31145 | 328.4 | 20914 | 32.9  | 0.0114 |
| 8  | 367.2694 | 34057 | 999.8 | 63664 | 100.0 | 0.0108 |
| 9  | 368.2728 | 30629 | 222.2 | 14150 | 22.2  | 0.0120 |
| 10 | 449.3572 | 31232 | 267.2 | 17014 | 26.7  | 0.0144 |

# Compound Spectrum List Report

## Cmpd 126, Dissect, 14.2 min

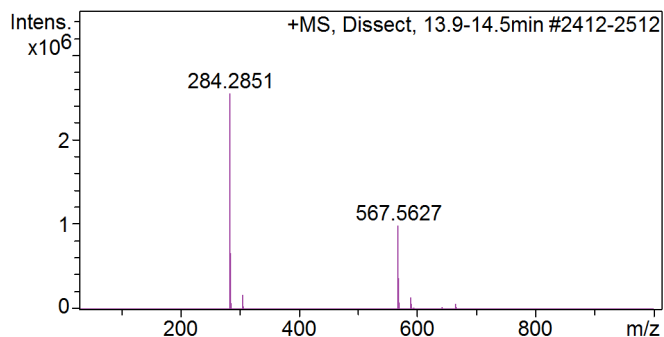

| #  | m/z      | Res.  | S/N   | I       | I %   | FWHM   |
|----|----------|-------|-------|---------|-------|--------|
| 1  | 284.2851 | 30659 | 988.7 | 2550195 | 100.0 | 0.0093 |
| 2  | 285.2885 | 36661 | 257.2 | 663315  | 26.0  | 0.0078 |
| 3  | 286.2916 | 30250 | 27.4  | 70709   | 2.8   | 0.0095 |
| 4  | 306.2664 | 34289 | 67.7  | 174678  | 6.8   | 0.0089 |
| 5  | 567.5627 | 47406 | 384.3 | 991300  | 38.9  | 0.0120 |
| 6  | 568.5659 | 42333 | 145.5 | 375164  | 14.7  | 0.0134 |
| 7  | 569.5691 | 32686 | 29.5  | 76039   | 3.0   | 0.0174 |
| 8  | 589.5438 | 35751 | 57.4  | 147993  | 5.8   | 0.0165 |
| 9  | 590.5469 | 32065 | 24.0  | 62023   | 2.4   | 0.0184 |
| 10 | 664.5621 | 32151 | 26.2  | 67568   | 2.6   | 0.0207 |

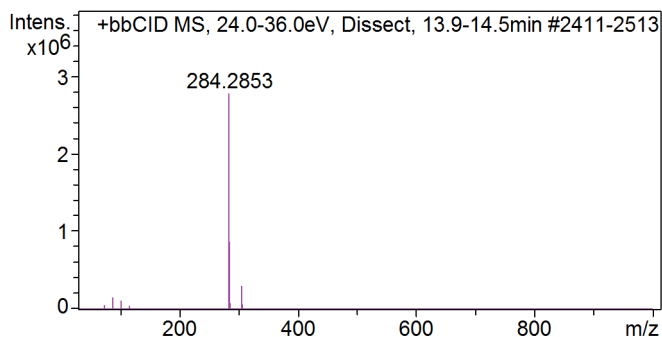

| #  | m/z      | Res.  | S/N   | I       | I %   | FWHM   |
|----|----------|-------|-------|---------|-------|--------|
| 1  | 74.0572  | 19057 | 18.6  | 51876   | 1.9   | 0.0039 |
| 2  | 88.0725  | 20793 | 57.8  | 161117  | 5.8   | 0.0042 |
| 3  | 102.0878 | 21434 | 41.1  | 114438  | 4.1   | 0.0048 |
| 4  | 116.1030 | 22726 | 16.4  | 45596   | 1.6   | 0.0051 |
| 5  | 284.2853 | 23607 | 999.4 | 2784749 | 100.0 | 0.0120 |
| 6  | 285.2690 | 31797 | 8.6   | 23927   | 0.9   | 0.0090 |
| 7  | 285.2884 | 37395 | 313.0 | 872126  | 31.3  | 0.0076 |
| 8  | 286.2916 | 30986 | 28.5  | 79420   | 2.9   | 0.0092 |
| 9  | 306.2663 | 36327 | 111.4 | 310460  | 11.1  | 0.0084 |
| 10 | 307.2696 | 32030 | 22.2  | 61883   | 2.2   | 0.0096 |

## Cmpd 127, Dissect, 14.3 min

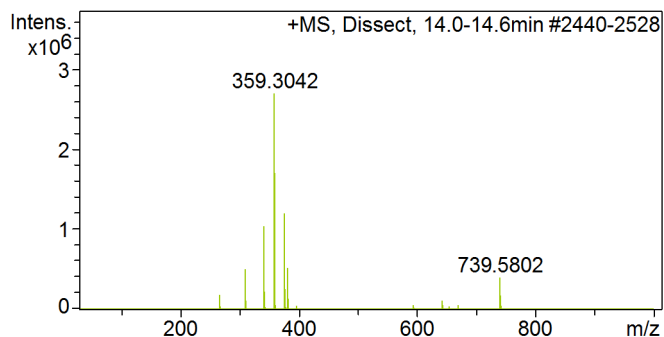

| #  | m/z      | Res.  | S/N   | I       | I %   | FWHM   |
|----|----------|-------|-------|---------|-------|--------|
| 1  | 267.2589 | 33445 | 67.6  | 186951  | 6.9   | 0.0080 |
| 2  | 310.2997 | 36668 | 184.4 | 509783  | 18.8  | 0.0085 |
| 3  | 341.2931 | 40055 | 378.1 | 1045285 | 38.6  | 0.0085 |
| 4  | 342.2966 | 36225 | 82.6  | 228499  | 8.4   | 0.0094 |
| 5  | 359.3042 | 18075 | 978.4 | 2704928 | 100.0 | 0.0199 |
| 6  | 360.3064 | 41612 | 617.0 | 1705751 | 63.1  | 0.0087 |
| 7  | 376.3288 | 42112 | 434.2 | 1200404 | 44.4  | 0.0089 |
| 8  | 377.3323 | 36962 | 94.4  | 261042  | 9.7   | 0.0102 |
| 9  | 381.2841 | 40771 | 189.3 | 523348  | 19.3  | 0.0094 |
| 10 | 739.5802 | 42029 | 145.7 | 402712  | 14.9  | 0.0176 |

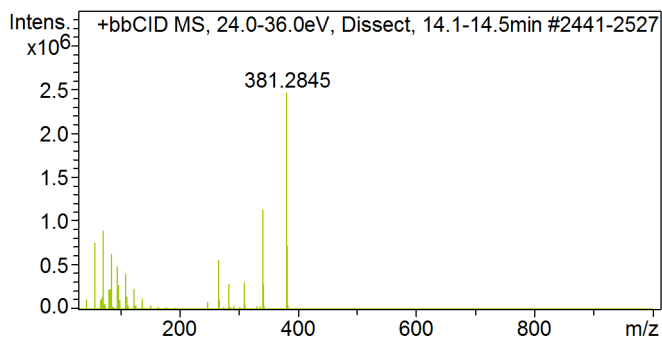

| #  | m/z      | Res.  | S/N   | I       | I %   | FWHM   |
|----|----------|-------|-------|---------|-------|--------|
| 1  | 57.0675  | 17957 | 309.0 | 760844  | 30.9  | 0.0032 |
| 2  | 71.0828  | 19950 | 364.4 | 897097  | 36.4  | 0.0036 |
| 3  | 85.0980  | 21741 | 256.7 | 632021  | 25.7  | 0.0039 |
| 4  | 95.0821  | 22418 | 198.8 | 489327  | 19.9  | 0.0042 |
| 5  | 109.0974 | 23549 | 165.3 | 406878  | 16.5  | 0.0046 |
| 6  | 267.2590 | 36733 | 228.2 | 561821  | 22.8  | 0.0073 |
| 7  | 310.2999 | 35530 | 125.5 | 308957  | 12.6  | 0.0087 |
| 8  | 341.2933 | 38272 | 460.7 | 1134230 | 46.1  | 0.0089 |
| 9  | 381.2845 | 38063 | 999.7 | 2461302 | 100.0 | 0.0100 |
| 10 | 382.2878 | 41254 | 292.9 | 721148  | 29.3  | 0.0093 |



# Compound Spectrum List Report

## Cmpd 128, Dissect, 14.3 min

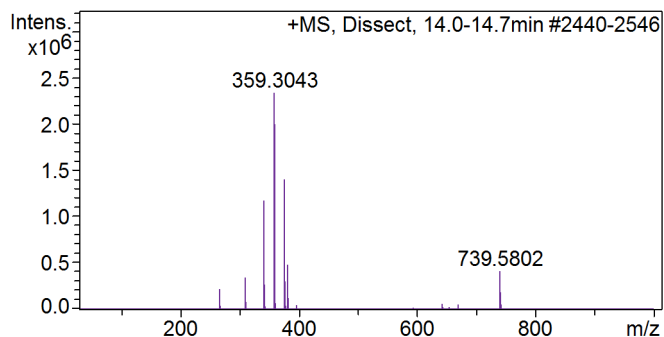

| #  | m/z      | Res.  | S/N   | I       | I %   | FWHM   |
|----|----------|-------|-------|---------|-------|--------|
| 1  | 267.2589 | 33544 | 93.8  | 223498  | 9.6   | 0.0080 |
| 2  | 310.2996 | 35505 | 146.3 | 348868  | 14.9  | 0.0087 |
| 3  | 341.2931 | 40166 | 491.5 | 1171608 | 50.1  | 0.0085 |
| 4  | 342.2966 | 36346 | 113.0 | 269351  | 11.5  | 0.0094 |
| 5  | 359.3043 | 17402 | 980.2 | 2336720 | 100.0 | 0.0206 |
| 6  | 360.3064 | 41764 | 835.7 | 1992159 | 85.3  | 0.0086 |
| 7  | 376.3288 | 42297 | 587.5 | 1400579 | 59.9  | 0.0089 |
| 8  | 377.3323 | 37168 | 129.3 | 308350  | 13.2  | 0.0102 |
| 9  | 381.2841 | 40778 | 202.9 | 483647  | 20.7  | 0.0094 |
| 10 | 739.5802 | 42801 | 175.4 | 418131  | 17.9  | 0.0173 |

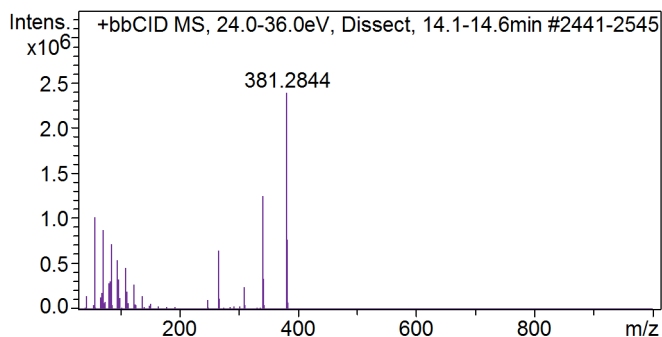

| #  | m/z      | Res.  | S/N   | I       | I %   | FWHM   |
|----|----------|-------|-------|---------|-------|--------|
| 1  | 57.0675  | 17961 | 425.7 | 1017026 | 42.6  | 0.0032 |
| 2  | 71.0828  | 19993 | 368.1 | 879468  | 36.8  | 0.0036 |
| 3  | 85.0980  | 21814 | 302.0 | 721551  | 30.2  | 0.0039 |
| 4  | 95.0821  | 22457 | 228.0 | 544621  | 22.8  | 0.0042 |
| 5  | 109.0973 | 23609 | 192.7 | 460464  | 19.3  | 0.0046 |
| 6  | 267.2589 | 36907 | 271.6 | 648897  | 27.2  | 0.0072 |
| 7  | 341.2932 | 38544 | 522.3 | 1247811 | 52.3  | 0.0089 |
| 8  | 342.2966 | 39449 | 142.1 | 339521  | 14.2  | 0.0087 |
| 9  | 381.2844 | 38061 | 999.1 | 2386885 | 100.0 | 0.0100 |
| 10 | 382.2877 | 41459 | 323.7 | 773288  | 32.4  | 0.0092 |

## Cmpd 129, Dissect, 14.4 min

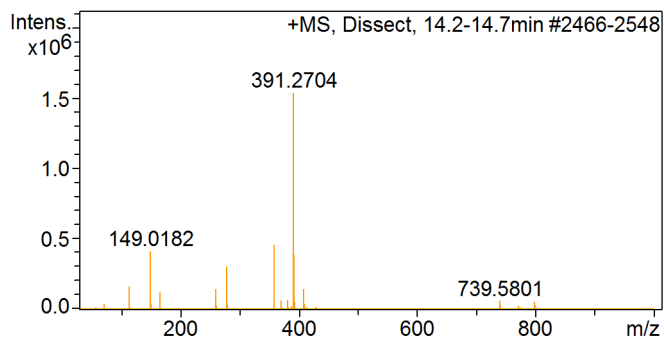

| #  | m/z      | Res.  | S/N   | I       | I %   | FWHM   |
|----|----------|-------|-------|---------|-------|--------|
| 1  | 113.1285 | 22135 | 106.7 | 164018  | 10.7  | 0.0051 |
| 2  | 149.0182 | 27067 | 268.4 | 412498  | 26.9  | 0.0055 |
| 3  | 167.0281 | 27163 | 81.3  | 124953  | 8.1   | 0.0061 |
| 4  | 261.1394 | 32430 | 94.8  | 145714  | 9.5   | 0.0081 |
| 5  | 279.1494 | 34285 | 197.8 | 304000  | 19.8  | 0.0081 |
| 6  | 359.3037 | 20570 | 300.0 | 461087  | 30.0  | 0.0175 |
| 7  | 381.2841 | 40569 | 42.4  | 65169   | 4.2   | 0.0094 |
| 8  | 391.2704 | 43199 | 998.6 | 1534966 | 100.0 | 0.0091 |
| 9  | 392.2738 | 39438 | 255.4 | 392587  | 25.6  | 0.0099 |
| 10 | 408.2963 | 35100 | 94.8  | 145725  | 9.5   | 0.0116 |

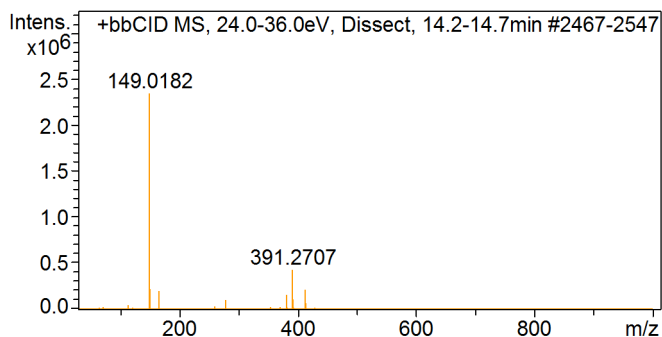

| #  | m/z      | Res.  | S/N   | I       | I %   | FWHM   |
|----|----------|-------|-------|---------|-------|--------|
| 1  | 113.1285 | 22077 | 18.3  | 46860   | 2.0   | 0.0051 |
| 2  | 149.0182 | 28245 | 914.1 | 2346830 | 100.0 | 0.0053 |
| 3  | 150.0215 | 26949 | 88.6  | 227397  | 9.7   | 0.0056 |
| 4  | 167.0282 | 28223 | 79.2  | 203279  | 8.7   | 0.0059 |
| 5  | 279.1496 | 31877 | 38.0  | 97432   | 4.2   | 0.0088 |
| 6  | 381.2843 | 39985 | 62.4  | 160249  | 6.8   | 0.0095 |
| 7  | 391.2707 | 39701 | 168.5 | 432496  | 18.4  | 0.0099 |
| 8  | 392.2740 | 35208 | 43.2  | 110965  | 4.7   | 0.0111 |
| 9  | 413.2518 | 37304 | 84.1  | 215977  | 9.2   | 0.0111 |
| 10 | 414.2552 | 34023 | 24.3  | 62404   | 2.7   | 0.0122 |

# Compound Spectrum List Report

## Cmpd 130, Dissect, 14.5 min

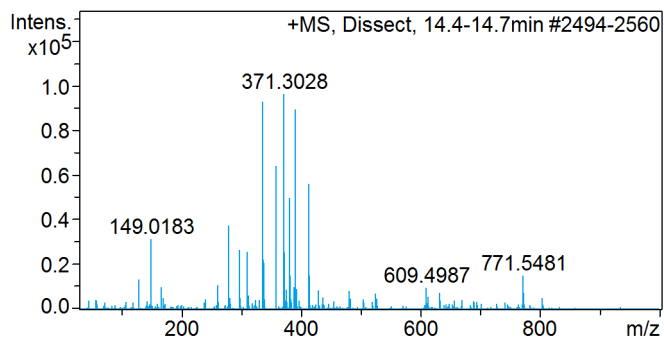

| #  | m/z      | Res.  | S/N   | I     | I %   | FWHM   |
|----|----------|-------|-------|-------|-------|--------|
| 1  | 149.0183 | 26935 | 326.5 | 31414 | 32.7  | 0.0055 |
| 2  | 279.1496 | 33685 | 390.8 | 37603 | 39.1  | 0.0083 |
| 3  | 298.3005 | 30742 | 277.2 | 26670 | 27.7  | 0.0097 |
| 4  | 310.2998 | 30944 | 268.9 | 25875 | 26.9  | 0.0100 |
| 5  | 336.3147 | 33743 | 965.3 | 92881 | 96.5  | 0.0100 |
| 6  | 359.3032 | 33224 | 664.8 | 63971 | 66.5  | 0.0108 |
| 7  | 371.3028 | 34248 | 999.8 | 96205 | 100.0 | 0.0108 |
| 8  | 381.2843 | 38427 | 517.8 | 49826 | 51.8  | 0.0099 |
| 9  | 391.2707 | 41857 | 927.4 | 89233 | 92.8  | 0.0093 |
| 10 | 413.2519 | 32387 | 584.3 | 56223 | 58.4  | 0.0128 |

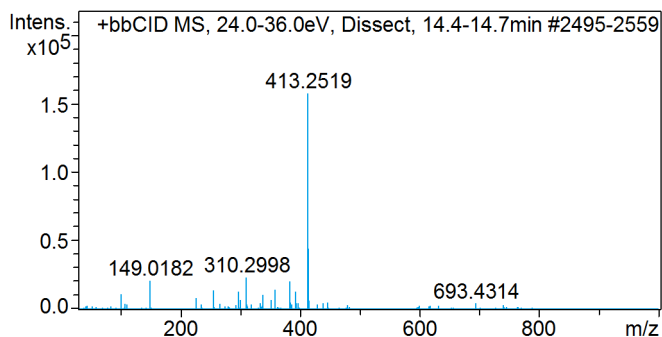

| #  | m/z      | Res.  | S/N   | I      | I %   | FWHM   |
|----|----------|-------|-------|--------|-------|--------|
| 1  | 101.0562 | 21101 | 73.3  | 11565  | 7.3   | 0.0048 |
| 2  | 149.0182 | 28364 | 133.9 | 21128  | 13.4  | 0.0053 |
| 3  | 256.2548 | 29749 | 89.8  | 14168  | 9.0   | 0.0086 |
| 4  | 298.3002 | 31855 | 83.3  | 13145  | 8.3   | 0.0094 |
| 5  | 310.2998 | 31252 | 148.0 | 23363  | 14.8  | 0.0099 |
| 6  | 358.2957 | 30688 | 94.1  | 14851  | 9.4   | 0.0117 |
| 7  | 383.1909 | 33308 | 131.7 | 20780  | 13.2  | 0.0115 |
| 8  | 393.2830 | 28867 | 84.9  | 13402  | 8.5   | 0.0136 |
| 9  | 413.2519 | 37276 | 997.5 | 157432 | 100.0 | 0.0111 |
| 10 | 414.2553 | 34577 | 280.8 | 44314  | 28.1  | 0.0120 |

## Cmpd 131, Dissect, 14.6 min

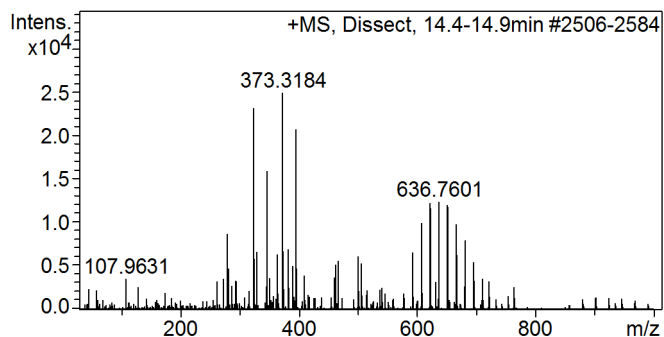

| #  | m/z      | Res.  | S/N   | I     | I %   | FWHM   |
|----|----------|-------|-------|-------|-------|--------|
| 1  | 324.3152 | 31012 | 927.7 | 23106 | 92.8  | 0.0105 |
| 2  | 347.1492 | 38181 | 638.4 | 15900 | 63.9  | 0.0091 |
| 3  | 373.3184 | 31111 | 999.4 | 24892 | 100.0 | 0.0120 |
| 4  | 395.2996 | 30493 | 828.1 | 20626 | 82.9  | 0.0130 |
| 5  | 621.7508 | 35684 | 489.8 | 12199 | 49.0  | 0.0174 |
| 6  | 622.0856 | 35345 | 468.5 | 11669 | 46.9  | 0.0176 |
| 7  | 636.4260 | 33816 | 481.3 | 11988 | 48.2  | 0.0188 |
| 8  | 636.7601 | 34414 | 496.6 | 12369 | 49.7  | 0.0185 |
| 9  | 651.1004 | 36055 | 481.0 | 11981 | 48.1  | 0.0181 |
| 10 | 651.4353 | 33668 | 473.8 | 11801 | 47.4  | 0.0193 |

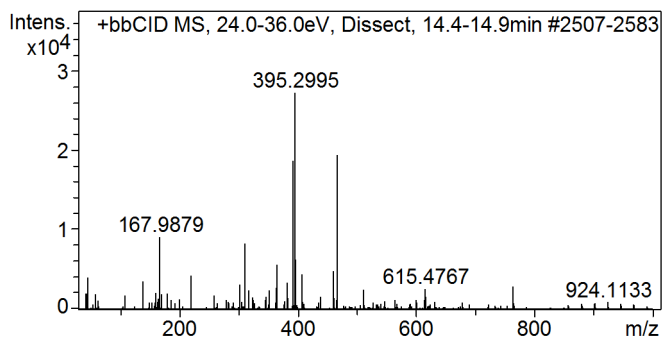

| #  | m/z      | Res.  | S/N   | I     | I %   | FWHM   |
|----|----------|-------|-------|-------|-------|--------|
| 1  | 167.9879 | 26654 | 335.0 | 9117  | 33.5  | 0.0063 |
| 2  | 311.2840 | 29794 | 305.0 | 8300  | 30.5  | 0.0104 |
| 3  | 365.0930 | 31631 | 207.4 | 5644  | 20.7  | 0.0115 |
| 4  | 392.1941 | 31675 | 684.5 | 18629 | 68.5  | 0.0124 |
| 5  | 395.2995 | 32021 | 999.9 | 27213 | 100.0 | 0.0123 |
| 6  | 396.3031 | 29868 | 230.2 | 6264  | 23.0  | 0.0133 |
| 7  | 407.3491 | 31634 | 162.6 | 4426  | 16.3  | 0.0129 |
| 8  | 460.3602 | 30948 | 178.0 | 4843  | 17.8  | 0.0149 |
| 9  | 466.5181 | 31522 | 713.0 | 19405 | 71.3  | 0.0148 |
| 10 | 467.5216 | 30669 | 223.0 | 6068  | 22.3  | 0.0152 |

# Compound Spectrum List Report

## Cmpd 132, Dissect, 14.7 min

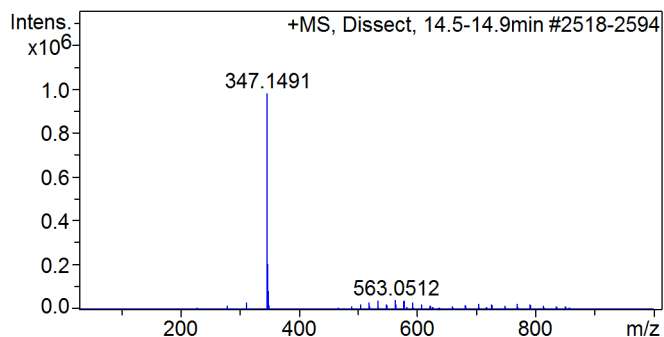

| #  | m/z      | Res.  | S/N   | I      | I %   | FWHM   |
|----|----------|-------|-------|--------|-------|--------|
| 1  | 347.1491 | 39316 | 999.6 | 979662 | 100.0 | 0.0088 |
| 2  | 348.1523 | 32782 | 211.9 | 207677 | 21.2  | 0.0106 |
| 3  | 349.1458 | 26573 | 87.0  | 85266  | 8.7   | 0.0131 |
| 4  | 519.0262 | 36871 | 32.3  | 31645  | 3.2   | 0.0141 |
| 5  | 533.7012 | 36142 | 38.9  | 38138  | 3.9   | 0.0148 |
| 6  | 534.0354 | 36125 | 34.4  | 33707  | 3.4   | 0.0148 |
| 7  | 563.0512 | 35304 | 43.2  | 42367  | 4.3   | 0.0159 |
| 8  | 563.3855 | 36193 | 41.0  | 40177  | 4.1   | 0.0156 |
| 9  | 577.7261 | 35970 | 37.4  | 36693  | 3.7   | 0.0161 |
| 10 | 578.0605 | 37197 | 38.8  | 38051  | 3.9   | 0.0155 |

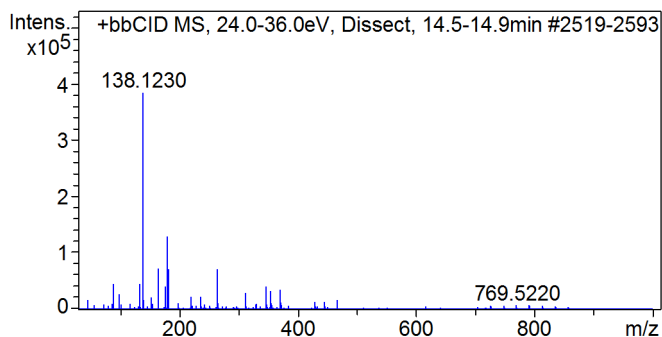

| #  | m/z      | Res.  | S/N   | I      | I %   | FWHM   |
|----|----------|-------|-------|--------|-------|--------|
| 1  | 89.0565  | 20160 | 117.9 | 45371  | 11.8  | 0.0044 |
| 2  | 133.0814 | 24600 | 120.7 | 46416  | 12.1  | 0.0054 |
| 3  | 138.1230 | 26402 | 999.4 | 384425 | 100.0 | 0.0052 |
| 4  | 165.9723 | 27458 | 189.4 | 72843  | 18.9  | 0.0060 |
| 5  | 177.1062 | 28338 | 108.2 | 41626  | 10.8  | 0.0062 |
| 6  | 180.1685 | 29088 | 337.9 | 129969 | 33.8  | 0.0062 |
| 7  | 181.1760 | 27135 | 261.6 | 100628 | 26.2  | 0.0067 |
| 8  | 182.9983 | 28882 | 187.0 | 71942  | 18.7  | 0.0063 |
| 9  | 265.0738 | 32701 | 188.1 | 72363  | 18.8  | 0.0081 |
| 10 | 347.1492 | 32261 | 108.5 | 41720  | 10.9  | 0.0108 |

## Cmpd 133, Dissect, 14.8 min

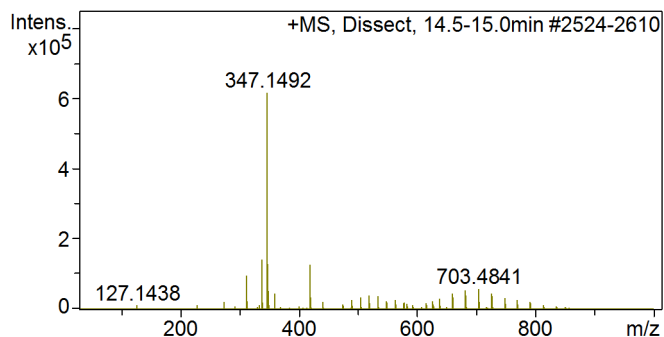

| #  | m/z      | Res.  | S/N   | I      | I %   | FWHM   |
|----|----------|-------|-------|--------|-------|--------|
| 1  | 312.3156 | 32386 | 158.3 | 97501  | 15.8  | 0.0096 |
| 2  | 338.3302 | 37366 | 231.3 | 142469 | 23.1  | 0.0091 |
| 3  | 347.1492 | 38076 | 999.7 | 615659 | 100.0 | 0.0091 |
| 4  | 348.1523 | 31763 | 209.8 | 129226 | 21.0  | 0.0110 |
| 5  | 349.1458 | 26330 | 87.6  | 53970  | 8.8   | 0.0133 |
| 6  | 419.3011 | 35603 | 207.4 | 127734 | 20.7  | 0.0118 |
| 7  | 659.4591 | 34684 | 76.4  | 47058  | 7.6   | 0.0190 |
| 8  | 681.4718 | 33378 | 90.5  | 55727  | 9.1   | 0.0204 |
| 9  | 703.4841 | 33986 | 96.3  | 59284  | 9.6   | 0.0207 |
| 10 | 725.4962 | 31556 | 76.4  | 47043  | 7.6   | 0.0230 |

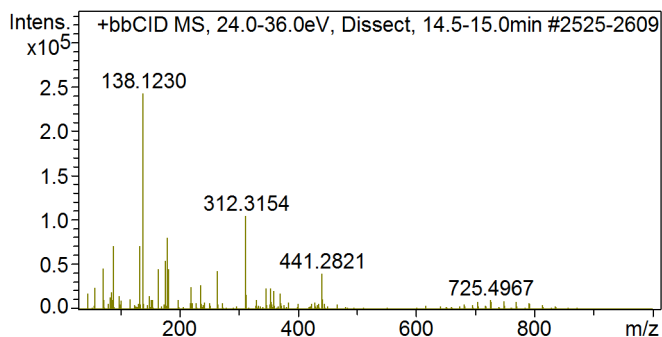

| #  | m/z      | Res.  | S/N    | I      | I %   | FWHM   |
|----|----------|-------|--------|--------|-------|--------|
| 1  | 71.0828  | 19367 | 191.6  | 46491  | 19.2  | 0.0037 |
| 2  | 89.0565  | 20349 | 292.8  | 71035  | 29.3  | 0.0044 |
| 3  | 133.0814 | 24551 | 293.8  | 71276  | 29.4  | 0.0054 |
| 4  | 138.1230 | 26023 | 1000.0 | 242600 | 100.0 | 0.0053 |
| 5  | 165.9723 | 27275 | 187.6  | 45506  | 18.8  | 0.0061 |
| 6  | 177.1062 | 28284 | 224.6  | 54498  | 22.5  | 0.0063 |
| 7  | 180.1685 | 28555 | 332.2  | 80604  | 33.2  | 0.0063 |
| 8  | 181.1759 | 26850 | 250.4  | 60738  | 25.0  | 0.0067 |
| 9  | 182.9983 | 28675 | 187.0  | 45372  | 18.7  | 0.0064 |
| 10 | 312.3154 | 33020 | 433.2  | 105089 | 43.3  | 0.0095 |

# Compound Spectrum List Report

## Cmpd 134, Dissect, 14.8 min

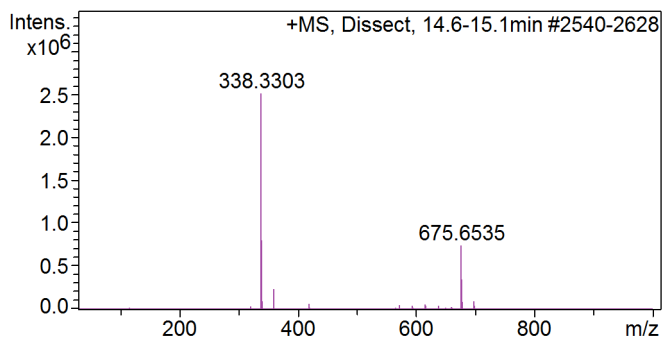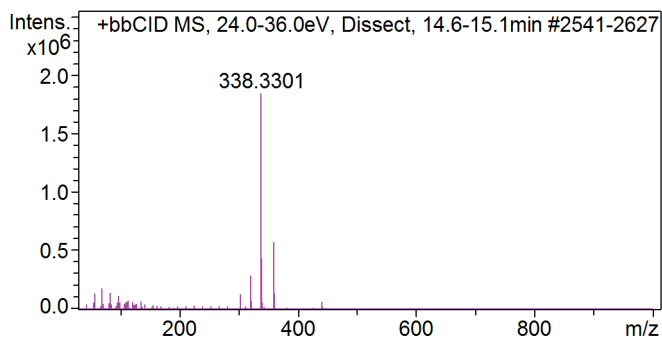

## Cmpd 135, Dissect, 14.9 min

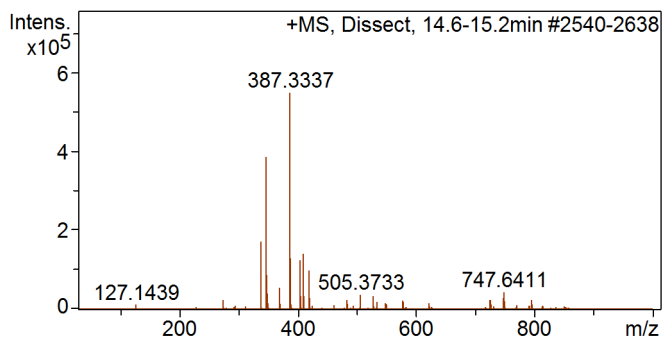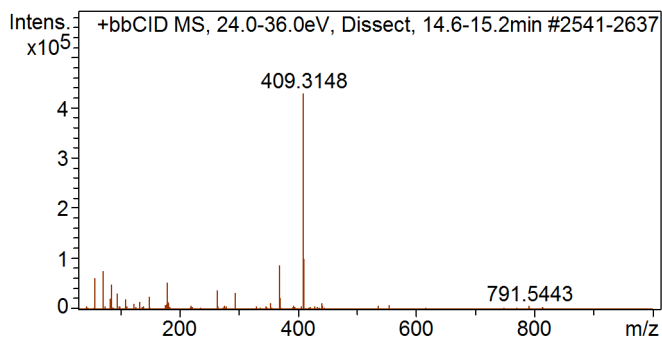

# Compound Spectrum List Report

## Cmpd 136, Dissect, 15.0 min

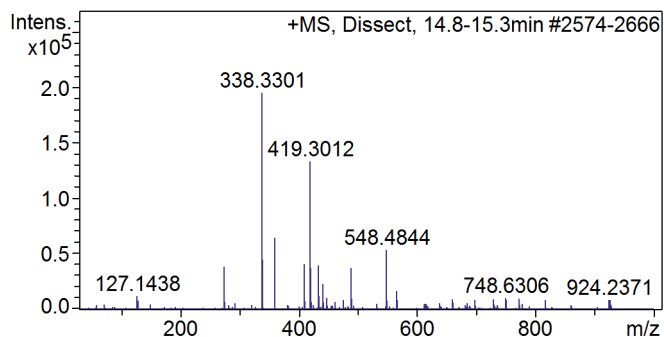

| #  | m/z      | Res.  | S/N   | I      | I %   | FWHM   |
|----|----------|-------|-------|--------|-------|--------|
| 1  | 275.1549 | 31685 | 198.1 | 38675  | 19.8  | 0.0087 |
| 2  | 338.3301 | 39259 | 999.9 | 195204 | 100.0 | 0.0086 |
| 3  | 339.3337 | 36148 | 231.5 | 45198  | 23.2  | 0.0094 |
| 4  | 360.3110 | 33663 | 331.9 | 64798  | 33.2  | 0.0107 |
| 5  | 409.3147 | 34804 | 210.0 | 40998  | 21.0  | 0.0118 |
| 6  | 419.3012 | 35636 | 681.3 | 132994 | 68.1  | 0.0118 |
| 7  | 420.3044 | 31658 | 191.5 | 37382  | 19.2  | 0.0133 |
| 8  | 433.3161 | 33458 | 205.3 | 40072  | 20.5  | 0.0130 |
| 9  | 488.3774 | 30666 | 192.9 | 37663  | 19.3  | 0.0159 |
| 10 | 548.4844 | 33304 | 274.4 | 53576  | 27.4  | 0.0165 |

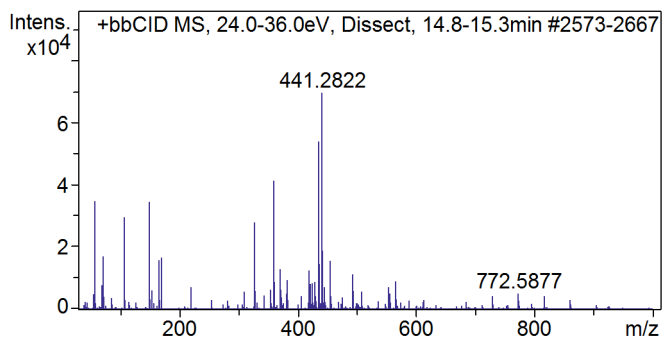

| #  | m/z      | Res.  | S/N   | I     | I %   | FWHM   |
|----|----------|-------|-------|-------|-------|--------|
| 1  | 57.0676  | 17530 | 498.7 | 34725 | 49.9  | 0.0033 |
| 2  | 71.0828  | 19179 | 245.0 | 17056 | 24.5  | 0.0037 |
| 3  | 107.0455 | 22150 | 424.8 | 29575 | 42.5  | 0.0048 |
| 4  | 149.0183 | 26182 | 495.5 | 34497 | 49.6  | 0.0057 |
| 5  | 327.2420 | 31196 | 322.2 | 22430 | 32.2  | 0.0105 |
| 6  | 327.3260 | 31396 | 401.9 | 27984 | 40.2  | 0.0104 |
| 7  | 360.3114 | 35876 | 594.9 | 41419 | 59.5  | 0.0100 |
| 8  | 435.3793 | 33813 | 772.1 | 53755 | 77.2  | 0.0129 |
| 9  | 441.2822 | 33152 | 999.7 | 69604 | 100.0 | 0.0133 |
| 10 | 442.2854 | 31654 | 273.6 | 19052 | 27.4  | 0.0140 |

## Cmpd 137, Dissect, 15.0 min

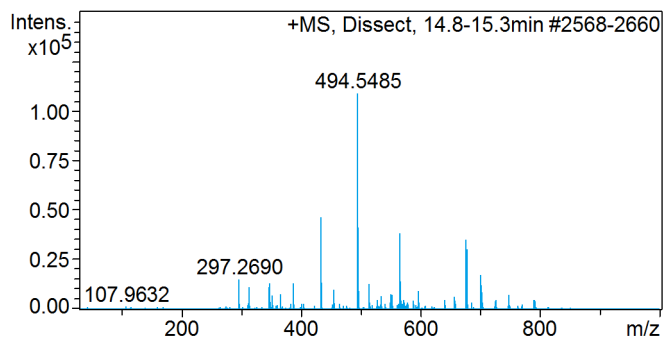

| #  | m/z      | Res.  | S/N   | I      | I %   | FWHM   |
|----|----------|-------|-------|--------|-------|--------|
| 1  | 433.3162 | 33855 | 425.8 | 46417  | 42.6  | 0.0128 |
| 2  | 494.5485 | 33941 | 999.8 | 108982 | 100.0 | 0.0146 |
| 3  | 495.5518 | 32166 | 380.3 | 41450  | 38.0  | 0.0154 |
| 4  | 565.5466 | 34284 | 353.4 | 38521  | 35.3  | 0.0165 |
| 5  | 675.4462 | 33701 | 323.1 | 35214  | 32.3  | 0.0200 |
| 6  | 675.6518 | 35671 | 314.6 | 34287  | 31.5  | 0.0189 |
| 7  | 676.5049 | 36442 | 248.6 | 27101  | 24.9  | 0.0186 |
| 8  | 676.5809 | 36520 | 215.9 | 23538  | 21.6  | 0.0185 |
| 9  | 676.6524 | 34194 | 185.1 | 20173  | 18.5  | 0.0198 |
| 10 | 677.4532 | 36289 | 279.8 | 30498  | 28.0  | 0.0187 |

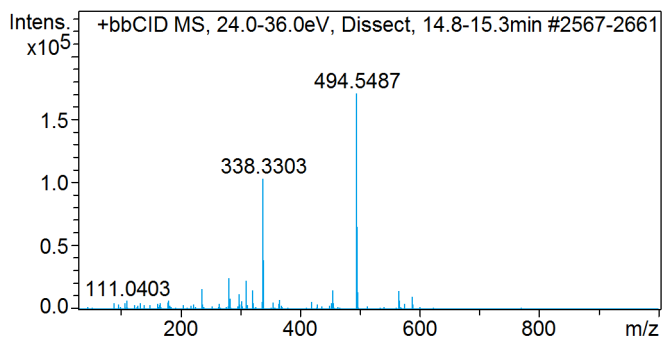

| #  | m/z      | Res.  | S/N   | I      | I %   | FWHM   |
|----|----------|-------|-------|--------|-------|--------|
| 1  | 237.0714 | 29581 | 96.9  | 16566  | 9.7   | 0.0080 |
| 2  | 282.2696 | 33040 | 146.8 | 25104  | 14.7  | 0.0085 |
| 3  | 310.3000 | 33400 | 134.5 | 22996  | 13.5  | 0.0093 |
| 4  | 321.3043 | 31078 | 89.7  | 15339  | 9.0   | 0.0103 |
| 5  | 338.3303 | 32991 | 604.2 | 103316 | 60.5  | 0.0103 |
| 6  | 339.2777 | 31745 | 228.9 | 39134  | 22.9  | 0.0107 |
| 7  | 339.3337 | 31267 | 149.1 | 25492  | 14.9  | 0.0109 |
| 8  | 455.2973 | 32674 | 89.1  | 15240  | 8.9   | 0.0139 |
| 9  | 494.5487 | 35880 | 999.0 | 170821 | 100.0 | 0.0138 |
| 10 | 495.5519 | 33273 | 383.1 | 65503  | 38.3  | 0.0149 |

# Compound Spectrum List Report

## Cmpd 138, Dissect, 15.2 min

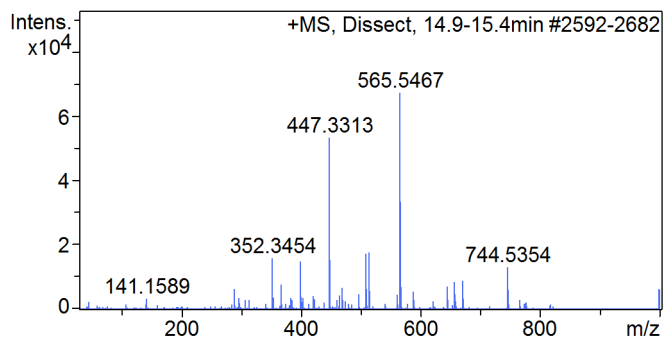

| #  | m/z      | Res.  | S/N   | I     | I %   | FWHM   |
|----|----------|-------|-------|-------|-------|--------|
| 1  | 352.3454 | 31081 | 237.3 | 15976 | 23.7  | 0.0113 |
| 2  | 399.3334 | 30283 | 221.2 | 14890 | 22.1  | 0.0132 |
| 3  | 447.3313 | 34133 | 790.4 | 53211 | 79.1  | 0.0131 |
| 4  | 448.3346 | 32207 | 230.0 | 15482 | 23.0  | 0.0139 |
| 5  | 508.5633 | 31340 | 258.7 | 17420 | 25.9  | 0.0162 |
| 6  | 514.2626 | 31246 | 262.7 | 17685 | 26.3  | 0.0165 |
| 7  | 565.5467 | 34059 | 999.8 | 67310 | 100.0 | 0.0166 |
| 8  | 566.5499 | 32013 | 497.2 | 33477 | 49.7  | 0.0177 |
| 9  | 670.4438 | 29302 | 133.5 | 8991  | 13.4  | 0.0229 |
| 10 | 744.5354 | 28996 | 195.9 | 13186 | 19.6  | 0.0257 |

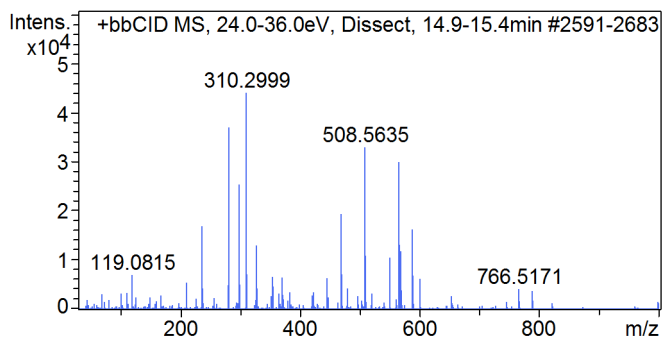

| #  | m/z      | Res.  | S/N   | I     | I %   | FWHM   |
|----|----------|-------|-------|-------|-------|--------|
| 1  | 237.0714 | 29753 | 384.5 | 16947 | 38.5  | 0.0080 |
| 2  | 282.2695 | 32762 | 839.2 | 36990 | 83.9  | 0.0086 |
| 3  | 299.2956 | 32335 | 576.4 | 25406 | 57.7  | 0.0093 |
| 4  | 310.2999 | 33274 | 999.7 | 44064 | 100.0 | 0.0093 |
| 5  | 327.3260 | 32516 | 295.5 | 13026 | 29.6  | 0.0101 |
| 6  | 469.3125 | 31581 | 440.4 | 19408 | 44.0  | 0.0149 |
| 7  | 508.5635 | 31942 | 745.4 | 32851 | 74.6  | 0.0159 |
| 8  | 565.5467 | 33153 | 679.2 | 29937 | 67.9  | 0.0171 |
| 9  | 566.5500 | 31700 | 300.4 | 13241 | 30.1  | 0.0179 |
| 10 | 587.5283 | 30579 | 369.2 | 16273 | 36.9  | 0.0192 |

## Cmpd 139, Dissect, 15.2 min

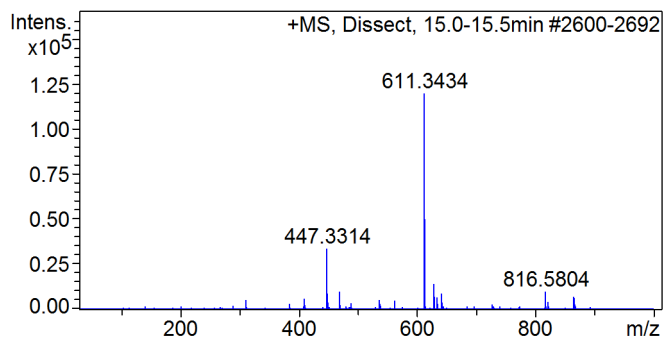

| #  | m/z      | Res.  | S/N   | I      | I %   | FWHM   |
|----|----------|-------|-------|--------|-------|--------|
| 1  | 447.3314 | 34574 | 281.7 | 33744  | 28.2  | 0.0129 |
| 2  | 448.3347 | 32447 | 76.6  | 9181   | 7.7   | 0.0138 |
| 3  | 469.3124 | 31854 | 84.2  | 10081  | 8.4   | 0.0147 |
| 4  | 611.3434 | 34848 | 999.6 | 119732 | 100.0 | 0.0175 |
| 5  | 612.3468 | 31822 | 418.9 | 50180  | 41.9  | 0.0192 |
| 6  | 613.3504 | 30530 | 107.9 | 12921  | 10.8  | 0.0201 |
| 7  | 628.3693 | 29160 | 119.4 | 14307  | 11.9  | 0.0215 |
| 8  | 640.5647 | 31368 | 75.5  | 9045   | 7.6   | 0.0204 |
| 9  | 816.5804 | 29284 | 83.1  | 9954   | 8.3   | 0.0279 |
| 10 | 864.2365 | 28985 | 62.1  | 7433   | 6.2   | 0.0298 |

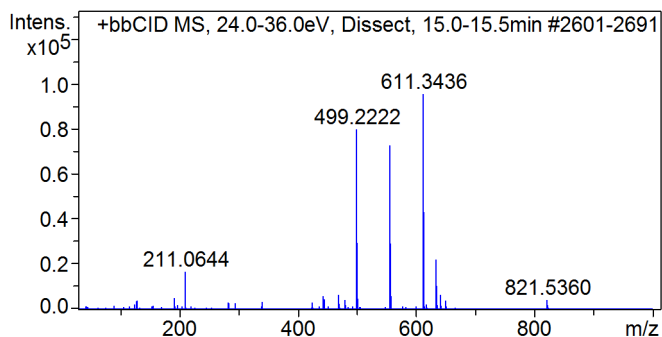

| #  | m/z      | Res.  | S/N   | I     | I %   | FWHM   |
|----|----------|-------|-------|-------|-------|--------|
| 1  | 211.0644 | 28265 | 175.9 | 16807 | 17.6  | 0.0075 |
| 2  | 499.2222 | 33646 | 833.1 | 79617 | 83.3  | 0.0148 |
| 3  | 500.2254 | 32473 | 309.4 | 29570 | 30.9  | 0.0154 |
| 4  | 555.2829 | 32428 | 761.6 | 72783 | 76.2  | 0.0171 |
| 5  | 556.2861 | 31873 | 306.4 | 29282 | 30.6  | 0.0175 |
| 6  | 611.3436 | 34028 | 999.8 | 95549 | 100.0 | 0.0180 |
| 7  | 612.3467 | 32579 | 453.2 | 43311 | 45.3  | 0.0188 |
| 8  | 613.3498 | 30507 | 105.3 | 10063 | 10.5  | 0.0201 |
| 9  | 633.3242 | 31203 | 232.3 | 22205 | 23.2  | 0.0203 |
| 10 | 634.3282 | 31124 | 112.1 | 10708 | 11.2  | 0.0204 |

# Compound Spectrum List Report

Bruker Compass DataAnalysis 4.4

8/28/2021 7:17:53 PM

by: demo

Page 70 of 70

---

---

---
