# Supplementary material for: Assessment of Xenoestrogens in Jordanian Water System: Activity and Identification
Source: MDPI journal article supplement (doi:10.3390/toxics11010063), 2023-01-09
Supplement: s1 [file s1]

## Supplementary Material S2

### List of Potential veterinary drugs pollutants

|    | <b>Name</b>                   | <b>CAS Number</b> |
|----|-------------------------------|-------------------|
| 1  | 2-Acetamido-5-nitrothiazole   | (140-40-9)        |
| 2  | 2-Aminoflubendazole           | (82050-13-3)      |
| 3  | 3-(Methylamino)propylamine    | (6291-84-5)       |
| 4  | 3-Amino-2-oxazolidinone       | (80-65-9)         |
| 5  | 4-Epitetracycline             | (79-85-6)         |
| 6  | 5-Hydroxyflunixin             | (75369-61-8)      |
| 7  | 5-Hydroxymebendazole          | (60254-95-7)      |
| 8  | Albendazole                   | (54965-21-8)      |
| 9  | Albendazole oxide             | (54029-12-8)      |
| 10 | Albendazole sulfone           | (75184-71-3)      |
| 11 | Albendazole-2-aminosulfone    | (80983-34-2)      |
| 12 | Altrenogest                   | (850-52-2)        |
| 13 | Amoxicillin                   | (26787-78-0)      |
| 14 | Ampicillin                    | (69-53-4)         |
| 15 | Amprolium                     | (121-25-5)        |
| 16 | Arprinocid                    | (55779-18-5)      |
| 17 | Azaperol                      | (2804-05-9)       |
| 18 | Azaperone                     | (1649-18-9)       |
| 19 | Baquiloprim                   | (102280-35-3)     |
| 20 | Basic violet 3. Methyl violet | (548-62-9)        |
| 21 | Betamethasone                 | (378-44-9)        |
| 22 | Brombuterol                   | (41937-02-4)      |
| 23 | Cabergoline                   | (81409-90-7)      |
| 24 | Carazolol                     | (57775-29-8)      |
| 25 | Carbadox                      | (6804-07-5)       |
| 26 | Carprofen                     | (53716-49-7)      |
| 27 | Cefalexin                     | (15686-71-2)      |
| 28 | Cefalonium                    | (5575-21-3)       |
| 29 | Cefazolin                     | (25953-19-9)      |
| 30 | Cefquinome                    | (84957-30-2)      |
| 31 | Ceftiofur                     | (80370-57-6)      |
| 32 | Chlordimeform                 | (6164-98-3)       |
| 33 | Chlormadinone acetate         | (302-22-7)        |
| 34 | Chlorpromazine                | (50-53-3)         |
| 35 | Chlortetracycline             | (57-62-5)         |
| 36 | Cimaterol                     | (54239-37-1)      |
| 37 | Cinoxacin                     | (28657-80-9)      |
| 38 | Ciprofloxacin                 | (85721-33-1)      |

|    |                                       |                |
|----|---------------------------------------|----------------|
| 39 | Clazuril                              | (101831-36-1)  |
| 40 | Clenbuterol                           | (37148-27-9)   |
| 41 | Clindamycin                           | (18323-44-9)   |
| 42 | Clorsulon                             | (60200-06-8)   |
| 43 | Closantel                             | (57808-65-8)   |
| 44 | Clostebol                             | (1093-58-9)    |
| 45 | Danofloxacin                          | (112398-08-0)  |
| 46 | Dapsone. 4.4-Diaminodiphenylsulfone   | (80-08-0)      |
| 47 | Decoquate                             | (18507-89-6)   |
| 48 | Demeclocycline                        | (127-33-3)     |
| 49 | Desacetyl cephapirin                  | (38115-21-8)   |
| 50 | Desfuroyl ceftiofur cystein disulfide | (158039-15-7)  |
| 51 | Dexamethasone                         | (50-02-2)      |
| 52 | Diaveridine                           | (5355-16-8)    |
| 53 | Diclazuril                            | (101831-37-2)  |
| 54 | Diclofenac                            | (15307-86-5)   |
| 55 | Dicyclanil                            | (112636-83-6)  |
| 56 | Diethylstilbestrol                    | (56-53-1)      |
| 57 | Difloxacin                            | (98106-17-3)   |
| 58 | Dimetridazole                         | (551-92-8)     |
| 59 | Dimetridazole-2-hydroxy               | (936-05-0)     |
| 60 | Dinitolmide                           | (148-01-6)     |
| 61 | Doramectin                            | (117704-25-3)  |
| 62 | Doxycycline                           | (564-25-0)     |
| 63 | Enoxacin                              | (74011-58-8)   |
| 64 | Enrofloxacin                          | (93106-60-6)   |
| 65 | erythro-Isoxsuprine                   | (579-56-6)     |
| 66 | erythro-Isoxsuprine                   | (579-56-6.HCl) |
| 67 | Erythromycin A                        | (114-07-8)     |
| 68 | Ethopabate                            | (59-06-3)      |
| 69 | Fenbendazole                          | (43210-67-9)   |
| 70 | Fenbendazole sulfone                  | (54029-20-8)   |
| 71 | Fenoterol                             | (13392-18-2)   |
| 72 | Firocoxib                             | (189954-96-9)  |
| 73 | Fleroxacin                            | (79660-72-3)   |
| 74 | Florfenicol                           | (73231-34-2)   |
| 75 | Florfenicol amine                     | (76639-93-5)   |
| 76 | Flubendazole                          | (31430-15-6)   |
| 77 | Flugestone 17-acetate                 | (2529-45-5)    |
| 78 | Flumequine                            | (42835-25-6)   |
| 79 | Flunixin                              | (38677-85-9)   |
| 80 | Fumagillin                            | (23110-15-8)   |
| 81 | Furaltadone                           | (139-91-3)     |

|     |                                |                                        |
|-----|--------------------------------|----------------------------------------|
| 82  | Furazolidone                   | (67-45-8)                              |
| 83  | Gamithromycin                  | (145435-72-9)                          |
| 84  | Halofuginone                   | (55837-20-2)                           |
| 85  | Haloperidol                    | (52-86-8)                              |
| 86  | Imidocarb                      | (27885-92-3)                           |
| 87  | Ipronidazole                   | (14885-29-1)                           |
| 88  | Ipronidazole-hydroxy           | (35175-14-5)                           |
| 89  | Ivermectin B1A                 | (70288-86-7 (70161-11-4 + 70209-81-3)) |
| 90  | Josamycin                      | (16846-24-5)                           |
| 91  | Ketoprofen                     | (22071-15-4)                           |
| 92  | Ketotriclabendazole            | (1201920-88-8)                         |
| 93  | Lasalocid                      | (25999-20-6. Na-salt)                  |
| 94  | Leucocrystal violet            | (603-48-5)                             |
| 95  | Leucomalachite green           | (129-73-7)                             |
| 96  | Leucomalachite green D6        | (1173021-13-0)                         |
| 97  | Leucomycin A5                  | (18361-45-0)                           |
| 98  | Levamisole                     | (14769-73-4)                           |
| 99  | Lincomycin                     | (154-21-2)                             |
| 100 | Lomefloxacin                   | (98079-51-7)                           |
| 101 | Mabuterol                      | (56341-08-3)                           |
| 102 | Maduramicin                    | (79356-08-4)                           |
| 103 | Malachite green                | (569-64-2)                             |
| 104 | Marbofloxacin                  | (115550-35-1)                          |
| 105 | Mebendazole                    | (31431-39-7)                           |
| 106 | Mebendazole-amine              | (52329-60-9)                           |
| 107 | Medroxyprogesterone 17-acetate | (71-58-9)                              |
| 108 | Mefenamic acid                 | (61-68-7)                              |
| 109 | Melengestrol acetate           | (2919-66-6)                            |
| 110 | Meloxicam                      | (71125-38-7)                           |
| 111 | Meloxicam D3                   | (942047-63-4 )                         |
| 112 | Metacycline                    | (914-00-1)                             |
| 113 | Methylprednisolone             | (83-43-2)                              |
| 114 | Metronidazole                  | (443-48-1)                             |
| 115 | Metronidazol-hydroxy           | (4812-40-2)                            |
| 116 | Monensin                       | (17090-79-8)                           |
| 117 | Morantel                       | (20574-50-9)                           |
| 118 | Moxidectin                     | (113507-06-5)                          |
| 119 | Nalidixic acid                 | (389-08-2)                             |
| 120 | Narasin                        | (55134-13-9)                           |
| 121 | Neospiramycin I                | (70253-62-2)                           |
| 122 | Nequinat                       | (13997-19-8)                           |
| 123 | Niclosamide                    | (50-65-7)                              |
| 124 | Nitrofurantoin                 | (67-20-9)                              |

|     |                               |                |
|-----|-------------------------------|----------------|
| 125 | Nitrofurazone                 | (59-87-0)      |
| 126 | Nitrovin. Difurazone          | (804-36-4)     |
| 127 | Nitroxynil                    | (1689-89-0)    |
| 128 | Norfloxacin                   | (70458-96-7)   |
| 129 | Norfloxacin D5                | (1015856-57-1) |
| 130 | Norgestimate                  | (35189-28-7)   |
| 131 | Novobiocin                    | (303-81-1)     |
| 132 | Ofloxacin                     | (82419-36-1)   |
| 133 | Olaquinox                     | (23696-28-8)   |
| 134 | Oleandomycin                  | (3922-90-5)    |
| 135 | Orbifloxacin                  | (113617-63-3)  |
| 136 | Ormetoprim                    | (6981-18-6)    |
| 137 | Oxfendazole                   | (53716-50-0)   |
| 138 | Oxibendazole                  | (20559-55-1)   |
| 139 | Oxolinic acid                 | (14698-29-4)   |
| 140 | Oxyclozanide                  | (2277-92-1)    |
| 141 | Oxyphenbutazone               | (129-20-4)     |
| 142 | Phenylbutazone                | (50-33-9)      |
| 143 | Piperazine                    | (110-85-0)     |
| 144 | Pirlimycin                    | (79548-73-5)   |
| 145 | Ponazuril                     | (69004-04-2)   |
| 146 | Prednisolone                  | (50-24-8)      |
| 147 | Propionylpromazine            | (3568-24-9)    |
| 148 | Pyrimethamine                 | (58-14-0)      |
| 149 | Ractopamine                   | (97825-25-7)   |
| 150 | Rafoxanide                    | (22662-39-1)   |
| 151 | Rifaximin                     | (80621-81-4)   |
| 152 | Robenidine                    | (25875-51-8)   |
| 153 | Ronidazole                    | (7681-76-7)    |
| 154 | Roxithromycin                 | (80214-83-1 )  |
| 155 | Salbutamol                    | (18559-94-9)   |
| 156 | Salicylic acid                | (69-72-7)      |
| 157 | Salinomycin                   | (53003-10-4)   |
| 158 | Sparfloxacin                  | (110871-86-8)  |
| 159 | Sulfabenzamide                | (127-71-9)     |
| 160 | Sulfacetamide                 | (144-80-9)     |
| 161 | Sulfachloropyridazine         | (80-32-0)      |
| 162 | Sulfaclozine                  | (102-65-8)     |
| 163 | Sulfadiazine                  | (68-35-9)      |
| 164 | Sulfadimethoxine              | (122-11-2)     |
| 165 | Sulfadimidine. Sulfamethazine | (57-68-1)      |
| 166 | Sulfadoxine                   | (2447-57-6)    |
| 167 | Sulfaethoxypyridazine         | (963-14-4)     |

|     |                                    |                              |
|-----|------------------------------------|------------------------------|
| 168 | Sulfaguanidine                     | (57-67-0)                    |
| 169 | Sulfamerazine                      | (127-79-7)                   |
| 170 | Sulfameter. Sulfamethoxydiazine    | (651-06-9)                   |
| 171 | Sulfamethizole                     | (144-82-1)                   |
| 172 | Sulfamethoxazole                   | (723-46-6)                   |
| 173 | Sulfamethoxazole D4                | (1020719-86-1)               |
| 174 | Sulfamethoxypyridazine             | (80-35-3)                    |
| 175 | Sulfamonomethoxine                 | (1220-83-3)                  |
| 176 | Sulfamoxole                        | (729-99-7)                   |
| 177 | Sulfanilamide                      | (63-74-1)                    |
| 178 | Sulfanitran                        | (122-16-7)                   |
| 179 | Sulfaphenazole                     | (526-08-9)                   |
| 180 | Sulfapyridine                      | (144-83-2)                   |
| 181 | Sulfaquinoxaline                   | (59-40-5)                    |
| 182 | Sulfathiazole                      | (72-14-0)                    |
| 183 | Sulfatroxazole                     | (23256-23-7)                 |
| 184 | Sulfisomidine                      | (515-64-0)                   |
| 185 | Sulfisoxazole. Sulfafurazole       | (127-69-5)                   |
| 186 | Sulfisozole                        | (73247-57-1) (Na.79921-43-0) |
| 187 | Terbutaline                        | (23031-25-6)                 |
| 188 | Testosterone                       | (58-22-0)                    |
| 189 | Tetracycline                       | (60-54-8)                    |
| 190 | Thiamphenicol                      | (15318-45-3)                 |
| 191 | Tiamulin                           | (55297-95-5)                 |
| 192 | Tilmicosin                         | (108050-54-0)                |
| 193 | Tolfenamic acid                    | (13710-19-5)                 |
| 194 | Toltrazuril                        | (69004-03-1)                 |
| 195 | Toltrazuril sulfoxide              | (69004-15-5)                 |
| 196 | Triclabendazole                    | (68786-66-3)                 |
| 197 | Trimethoprim                       | (738-70-5)                   |
| 198 | Tylosin 3-acetate                  | (63409-10-9)                 |
| 199 | Tylosin A                          | (1401-69-0)                  |
| 200 | Tylosin B. Desmycosin              | (11032-98-7)                 |
| 201 | Valnemulin                         | (101312-92-9)                |
| 202 | Vedaprofen                         | (71109-09-6)                 |
| 203 | Virginiamycin S1. Staphylomycin S1 | (23152-29-6)                 |
| 204 | Xylazine                           | (7361-61-7)                  |
| 205 | Zeranol                            | (26538-44-3)                 |
| 206 | Zilpaterol                         | (117827-79-9)                |
