# Supplementary material for: Assessment of Xenoestrogens in Jordanian Water System: Activity and Identification
Source: MDPI journal article supplement (doi:10.3390/toxics11010063), 2023-01-09
Supplement: s1 [file s1]

# Supplementary Material S3

## List of Potential Insecticides, pesticides and herbicides pollutants

|    | Name                                                           | CAS Number    |
|----|----------------------------------------------------------------|---------------|
| 1  | 1-(4-isopropylphenyl)-urea                                     | (56046-17-4)  |
| 2  | 1.2.3.6-Tetrahydrophthalimide (cis-)                           | (1469-48-3)   |
| 3  | 1-Naphthylaceticacid                                           | (86-87-3)     |
| 4  | 2.3.4.6-Tetrachlorophenol                                      | (58-90-2)     |
| 5  | 2.4 Dimethylphenyl-N-methylformamidine<br>(metabolite Amitraz) | (60397-77-5 ) |
| 6  | 2.4.6-Trichlorophenol                                          | (88-06-2)     |
| 7  | 2-Aminobenzimidazole                                           | (934-32-7)    |
| 8  | 2-Phenylphenol                                                 | (90-43-7)     |
| 9  | 3 5 6-Trichloro-2-pyridinol (TCPy)                             | (6515-38-4)   |
| 10 | 4-Chlor-2-methylphenol                                         | (1570-64-5)   |
| 11 | 4-Methoxy-1.3-phenylenediamine                                 | (615-05-4)    |
| 12 | Acephate                                                       | (30560-19-1)  |
| 13 | Acequinocyl                                                    | (57960-19-7)  |
| 14 | Acetamiprid                                                    | (135410-20-7) |
| 15 | Acetochlor                                                     | (34256-82-1)  |
| 16 | Acibenzolar-S-Methyl                                           | (135158-54-2) |
| 17 | Acifluorfen                                                    | (50594-66-6)  |
| 18 | Aclonifen                                                      | (74070-46-5)  |
| 19 | AD-67                                                          | (71526-07-3)  |
| 20 | Alachlor                                                       | (15972-60-8)  |
| 21 | Alanycarb                                                      | (83130-01-2)  |
| 22 | Albendazole                                                    | (54965-21-8)  |
| 23 | Aldicarb                                                       | (116-06-3)    |
| 24 | Aldicarb-sulfone (Aldoxycarb)                                  | (1646-88-4)   |
| 25 | Aldicarb-sulfoxide                                             | (1646-87-3 )  |
| 26 | Allethrin                                                      | (584-79-2)    |
| 27 | Allidochlor                                                    | (93-71-0)     |
| 28 | Alloxydim                                                      | (55634-91-8)  |
| 29 | Ametoctradin                                                   | (865318-97-4) |
| 30 | Ametryn                                                        | (834-12-8)    |
| 31 | Amicarbazone                                                   | (129909-90-6) |
| 32 | Amidosulfuron                                                  | (120923-37-7) |
| 33 | Aminocarb (Metacil)                                            | (2032-59-9)   |
| 34 | Aminopyralid                                                   | (150114-71-9) |
| 35 | Amisulbrom                                                     | (348635-87-0) |
| 36 | Amitraz                                                        | (33089-61-1)  |

|    |                                       |                |
|----|---------------------------------------|----------------|
| 37 | Amitrole                              | (61-82-5)      |
| 38 | Ancymidol                             | (12771-68-5)   |
| 39 | Anilazine (Zinochlor. Dyrene)         | (101-05-3)     |
| 40 | Anilofos                              | (64249-01-0)   |
| 41 | Anthraquinone                         | (84-65-1)      |
| 42 | Aramite                               | (140-57-8)     |
| 43 | Asana (Esfenvalerate)                 | (66230-04-4)   |
| 44 | Aspon                                 | (3244-90-4)    |
| 45 | Asulam                                | (3337-71-1)    |
| 46 | Asulam metabolite Acetyl Sulfanilamid | (na)           |
| 47 | Atraton                               | (1610-17-9)    |
| 48 | Atrazine                              | (1912-24-9)    |
| 49 | Atrazine 2-Hydroxy                    | (2163-68-0)    |
| 50 | Atrazine D5                           | (163165-75-1 ) |
| 51 | Atrazine-desethyl                     | (6190-65-4)    |
| 52 | Atrazine-desethyl D6                  | (na)           |
| 53 | Atrazine-desisopropyl                 | (1007-28-9)    |
| 54 | AvermectinB1b (Abamectin)             | (71751-41-2)   |
| 55 | Azaconazole                           | (60207-31-0)   |
| 56 | Azadirachtin                          | (11141-17-6)   |
| 57 | Azamethiphos                          | (35575-96-3)   |
| 58 | Azimsulfuron                          | (120162-55-2)  |
| 59 | Azinphos-ethyl                        | (2642-71-9)    |
| 60 | Azinphos-methyl (Guthion)             | (86-50-0)      |
| 61 | Aziprotryne                           | (4658-28-0)    |
| 62 | Azoxystrobin                          | (131860-33-8)  |
| 63 | BAC 10                                | (965-32-2)     |
| 64 | BAC 12                                | (139-07-1)     |
| 65 | BAC 14                                | (139-08-2)     |
| 66 | BAC 16                                | (122-18-9)     |
| 67 | BAC 18                                | (122-19-0)     |
| 68 | Barban (endo) (isomerA)               | (101-27-9)     |
| 69 | Beflubutamid                          | (113614-08-7)  |
| 70 | Benalaxyl                             | (71626-11-4)   |
| 71 | Benazolin                             | (3813-05-6)    |
| 72 | Benazolin-ethyl ester                 | (25059-80-7)   |
| 73 | Bendiocarb                            | (22781-23-3)   |
| 74 | Benfuracarb                           | (82560-54-1)   |
| 75 | Benfuresate                           | (68505-69-1)   |
| 76 | Benodanil                             | (15310-01-7)   |
| 77 | Benomyl                               | (17804-35-2)   |

|     |                                                           |                |
|-----|-----------------------------------------------------------|----------------|
| 78  | Benoxacor                                                 | (98730-04-2)   |
| 79  | Bensulfuron-methyl                                        | (83055-99-6)   |
| 80  | Bensulide                                                 | (741-58-2)     |
| 81  | Bensultap                                                 | (17606-31-4)   |
| 82  | Bentazone                                                 | (25057-89-0)   |
| 83  | Benthiavalicarb-isopropyl                                 | (177406-68-7)  |
| 84  | Benzisothiazol-3(2H)-one 1-2-                             | (2634-33-5)    |
| 85  | Benzofenap                                                | (82692-44-2)   |
| 86  | Benzoic acid 3-6-Dichloro-2-hydroxy- (dicamba metabolite) | (3401-80-7)    |
| 87  | Benzovindiflupyr                                          | (1072957-71-1) |
| 88  | Benzoximate                                               | (29104-30-1)   |
| 89  | Benzoylprop-ethyl                                         | (22212-55-1)   |
| 90  | Benzthiazuron                                             | (1929-88-0)    |
| 91  | Benzylaminopurine 6-                                      | (1214-39-7)    |
| 92  | Bifenazate                                                | (149877-41-8)  |
| 93  | Bifenox                                                   | (42576-02-3)   |
| 94  | Bifenthrin                                                | (82657-04-3)   |
| 95  | Bioallethrin                                              | (584-79-2)     |
| 96  | Bioresmethrin                                             | (28434-01-7)   |
| 97  | Bispyribac                                                | (125401-75-4)  |
| 98  | Bitertanol                                                | (55179-31-2)   |
| 99  | Bixafen                                                   | (581809-46-3)  |
| 100 | Boscalid                                                  | (188425-85-6)  |
| 101 | Brodifacoum                                               | (56073-10-0)   |
| 102 | Bromacil                                                  | (314-40-9)     |
| 103 | Bromadiolone                                              | (28772-56-7)   |
| 104 | Bromfenvinfos                                             | (33399-00-7)   |
| 105 | Bromobutide                                               | (74712-19-9)   |
| 106 | Bromophos (Bromophos-methyl)                              | (2104-96-3)    |
| 107 | Bromophos-ethyl                                           | (4824-78-6)    |
| 108 | Bromoxynil                                                | (1689-84-5)    |
| 109 | Bromuconazole                                             | (116255-48-2)  |
| 110 | BTS 44596 (metabolite prochloraz)                         | (na)           |
| 111 | Bupirimate                                                | (41483-43-6)   |
| 112 | Buprofezin                                                | (953030-84-7)  |
| 113 | Butachlor                                                 | (23184-66-9)   |
| 114 | Butafenacil                                               | (134605-64-4)  |
| 115 | Butamifos                                                 | (36335-67-8)   |
| 116 | Butocarboxim                                              | (34681-10-2)   |
| 117 | Butocarboxim-sulfoxid                                     | (34681-24-8)   |

|     |                                         |                |
|-----|-----------------------------------------|----------------|
| 118 | Butoxycarboxim                          | (34681-23-7)   |
| 119 | Butralin                                | (33629-47-9)   |
| 120 | Buturon                                 | (3766-60-7)    |
| 121 | Butylate                                | (2008-41-5)    |
| 122 | Cadusafos                               | (95465-99-9)   |
| 123 | Cafenstrole                             | (125306-83-4)  |
| 124 | Cambendazole                            | (26097-80-3)   |
| 125 | Captafol                                | (2425-06-1)    |
| 126 | Captan                                  | (133-06-2)     |
| 127 | Carbamate Ethyl-N-(3-hydroxyphenyl)-    | (7159-96-8)    |
| 128 | Carbanilide                             | (102-07-8)     |
| 129 | Carbanolate                             | (671-04-5)     |
| 130 | Carbaryl                                | (63-25-2)      |
| 131 | Carbendazim                             | (10605-21-7)   |
| 132 | Carbetamide                             | (16118-49-3)   |
| 133 | Carbofuran                              | (1563-66-2)    |
| 134 | Carbofuran 3-keto-                      | (16709-30-1)   |
| 135 | Carbofuran D3                           | (1007459-98-4) |
| 136 | Carbofuran-3-hydroxy                    | (16655-82-6)   |
| 137 | Carbophenothion                         | (786-19-6)     |
| 138 | Carbophenothion-Methyl                  | (953-17-3)     |
| 139 | Carbosulfan                             | (55285-14-8)   |
| 140 | Carboxin                                | (5234-68-4)    |
| 141 | Carfentrazone-ethyl                     | (128639-02-1)  |
| 142 | Carpropamid                             | (104030-54-8)  |
| 143 | Carvone                                 | (99-49-0)      |
| 144 | Cetylpyridinium chloride                | (6004-24-6)    |
| 145 | CGA 321113 (Trifloxystrobin Metabolite) | (252913-85-2)  |
| 146 | Chinomethionat                          | (2439-01-2)    |
| 147 | Chlomethoxyfen                          | (32861-85-1)   |
| 148 | Chloramben                              | (133-90-4)     |
| 149 | Chlorantraniliprole                     | (500008-45-7)  |
| 150 | Chlorbromuron                           | (13360-45-7)   |
| 151 | Chlorbufam                              | (1967-16-4)    |
| 152 | Chlordimeform                           | (6164-98-3)    |
| 153 | Chlorfenapyr                            | (122453-73-0)  |
| 154 | Chlorfenprop-methyl                     | (14437-17-3)   |
| 155 | Chlorfenson.Ovex.ephirsulfonate.ovatron | (80-33-1)      |
| 156 | Chlorfenvinphos                         | (470-90-6)     |
| 157 | Chlorfluazuron                          | (71422-67-8)   |
| 158 | Chloridazon-desphenyl-methyl            | (17254-80-7)   |

|     |                                    |               |
|-----|------------------------------------|---------------|
| 159 | Chloridazone                       | (1698-60-8)   |
| 160 | Chlorimuronethyl                   | (90982-32-4)  |
| 161 | Chlormequat                        | (7003-89-6)   |
| 162 | Chlorothalonil-4-hydroxy           | (na)          |
| 163 | Chlorotoluron                      | (15545-48-9)  |
| 164 | Chloroxuron (Chloroxifenidim)      | (1982-47-4)   |
| 165 | Chlorpropham                       | (101-21-3)    |
| 166 | Chlorpyrifos O-analog              | (5598-15-2)   |
| 167 | Chlorpyrifos                       | (2921-88-2)   |
| 168 | Chlorpyrifos-methyl                | (5598-13-0)   |
| 169 | Chlorsulfuron                      | (64902-72-3)  |
| 170 | Chlorthal-dimethyl (DCPA. Dacthal) | (1861-32-1)   |
| 171 | Chlorthiamid                       | (1918-13-4)   |
| 172 | Chlorthion                         | (500-28-7)    |
| 173 | Chlorthiophos                      | (60238-56-4)  |
| 174 | Chlozolate                         | (72391-46-9)  |
| 175 | Chromafenozide                     | (143807-66-3) |
| 176 | Cinidon-ethyl                      | (142891-20-1) |
| 177 | Cinosulfuron                       | (94593-91-6)  |
| 178 | Clethodim                          | (99129-21-2)  |
| 179 | Climbazole                         | (38083-17-9)  |
| 180 | Clodinafop acid                    | (114420-56-3) |
| 181 | Clodinafop-propargyl               | (105512-06-9) |
| 182 | Clofentezine                       | (74115-24-5)  |
| 183 | Clomazone (Command)                | (81777-89-1)  |
| 184 | Clomeprop                          | (84496-56-0)  |
| 185 | Cloprop                            | (101-10-0)    |
| 186 | Clopyralid                         | (1702-17-6)   |
| 187 | Cloquintocet-1-methyl-hexyl ester  | (99607-70-2)  |
| 188 | Cloransulam-methyl                 | (147150-35-4) |
| 189 | Clothiandin                        | (210880-92-5) |
| 190 | Coumachlor                         | (81-82-3)     |
| 191 | Coumafuryl                         | (117-52-2)    |
| 192 | Coumaphos                          | (56-72-4)     |
| 193 | Coumatetralyl                      | (5836-29-3)   |
| 194 | Crimidine                          | (535-89-7)    |
| 195 | Crotoxyphos                        | (7700-17-6)   |
| 196 | Crufomate                          | (299-86-5)    |
| 197 | Cumyluron                          | (99485-76-4)  |
| 198 | Cyanazine                          | (21725-46-2)  |
| 199 | Cyanofenphos                       | (13067-93-1)  |

|     |                                                                   |               |
|-----|-------------------------------------------------------------------|---------------|
| 200 | Cyanophos                                                         | (2636-26-2)   |
| 201 | Cyantraniliprole                                                  | (736994-63-1) |
| 202 | Cyazofamid                                                        | (120116-88-3) |
| 203 | Cyclanilide                                                       | (113136-77-9) |
| 204 | Cycloate                                                          | (1134-23-2)   |
| 205 | Cycloheximide                                                     | (66-81-9)     |
| 206 | Cycloprothrin                                                     | (63935-38-6)  |
| 207 | Cyclosulfamuron                                                   | (136849-15-5) |
| 208 | Cycloxydim                                                        | (101205-02-1) |
| 209 | Cycluron                                                          | (2163-69-1)   |
| 210 | Cyenopyrafen                                                      | (560121-52-0) |
| 211 | Cyflufenamid                                                      | (180409-60-3) |
| 212 | Cyflumetofen                                                      | (400882-07-7) |
| 213 | Cyfluthrin (Baythroid)                                            | (68359-37-5)  |
| 214 | Cyhalofop acid                                                    | (122008-78-0) |
| 215 | Cyhalofop butyl                                                   | (122008-85-9) |
| 216 | Cyhalothrin (lambda-)                                             | (91465-08-6)  |
| 217 | Cymiazole                                                         | (61676-87-7)  |
| 218 | Cymoxanil                                                         | (57966-95-7)  |
| 219 | Cypermethrin                                                      | (52315-07-8)  |
| 220 | Cyphenothrin                                                      | (39515-40-7)  |
| 221 | Cyprazin                                                          | (22936-86-3)  |
| 222 | Cyproconazole                                                     | (94361-06-5)  |
| 223 | Cyprodinil                                                        | (121552-61-2) |
| 224 | Cyromazine                                                        | (66215-27-8)  |
| 225 | Cythioate                                                         | (115-93-5)    |
| 226 | Daimuron (Dymron)                                                 | (42609-52-9)  |
| 227 | Dalapon                                                           | (75-99-0)     |
| 228 | Dazomet                                                           | (533-74-4)    |
| 229 | DCPMU (1-(3,4-DICHLOROPHENYL)-3-METHYL<br>UREA)(Monomethyldiuron) | (3567-62-2)   |
| 230 | DCPU (1,3,4-dichlorophenyl-urea)                                  | (2327-02-8)   |
| 231 | DDA (2,2-bis(4-chlorophenyl)-acetic acid)                         | (83-05-6)     |
| 232 | DDAC-C10                                                          | (7173-51-5)   |
| 233 | DDAC-C12                                                          | (3401-74-9)   |
| 234 | DEET (Diethyltoluamide)                                           | (134-62-3)    |
| 235 | Deltamethrin                                                      | (52918-63-5)  |
| 236 | Demeton-S                                                         | (126-75-0)    |
| 237 | Demeton-S-methyl                                                  | (919-86-8)    |
| 238 | Demeton-S-methylsulfone                                           | (17040-19-6)  |
| 239 | Demeton-S-methylsulfoxid (Oxydemeton-methyl)                      | (301-12-2)    |

|     |                                       |               |
|-----|---------------------------------------|---------------|
| 240 | Desmedipham                           | (13684-56-5)  |
| 241 | Desmetryn                             | (1014-69-3)   |
| 242 | Diafenthiuron                         | (80060-09-9)  |
| 243 | Diafenthiuron metabolite CGA 140408   | (na)          |
| 244 | Diafenthiuron metabolite CGA 177960   | (na)          |
| 245 | Dialifos                              | (10311-84-9)  |
| 246 | Diallate                              | (2303-16-4)   |
| 247 | Diazinon                              | (333-41-5)    |
| 248 | Diazinon-O-analog                     | (962-58-3)    |
| 249 | Dibromo-4-hydroxy-benzoic acid 3-5-   | (3337-62-0)   |
| 250 | Dibutylchloredate                     | (1770-80-5)   |
| 251 | Dicamba                               | (1918-00-9)   |
| 252 | Dicamba-methyl                        | (6597-78-0)   |
| 253 | Dicapthon                             | (2463-84-5)   |
| 254 | Dichlofenthion                        | (97-17-6)     |
| 255 | Dichlofluanid                         | (1085-98-9)   |
| 256 | Dichlormid                            | (37764-25-3)  |
| 257 | Dichlorobenzamide                     | (2008-58-4)   |
| 258 | Dichlorophen                          | (97-23-4)     |
| 259 | Dichlorvos                            | (62-73-7)     |
| 260 | Diclobutrazol                         | (75736-33-3)  |
| 261 | Diclomezine                           | (62865-36-5)  |
| 262 | Dicloran                              | (99-30-9)     |
| 263 | Diclosulam                            | (145701-21-9) |
| 264 | Dicofol                               | (115-32-2)    |
| 265 | Dicrotophos                           | (141-66-2)    |
| 266 | Diethofencarb                         | (87130-20-9)  |
| 267 | Difenacoum                            | (56073-07-5)  |
| 268 | Difenoconazole                        | (119446-68-3) |
| 269 | Difenoxuron                           | (14214-32-5)  |
| 270 | Difenzoquat                           | (49866-87-7)  |
| 271 | Difethialone                          | (104653-34-1) |
| 272 | Diflubenzuron                         | (35367-38-5)  |
| 273 | Diflufenican                          | (83164-33-4)  |
| 274 | Diflufenzopyr                         | (109293-97-2) |
| 275 | Dihydroquinoline 2-2-4-Trimethyl-1-2- | (147-47-7)    |
| 276 | Dikegulac                             | (18467-77-1)  |
| 277 | Dimefuron                             | (34205-21-5)  |
| 278 | Dimepiperate                          | (61432-55-1)  |
| 279 | Dimethachlor                          | (50563-36-5)  |

|     |                                                  |                        |
|-----|--------------------------------------------------|------------------------|
| 280 | Dimethachlor metabolite CGA 369873               | (na)                   |
| 281 | Dimethametryn                                    | (22936-75-0)           |
| 282 | Dimethenamid                                     | (87674-68-8)           |
| 283 | Dimethipin                                       | (55290-64-7)           |
| 284 | Dimethirimol                                     | (5221-53-4)            |
| 285 | Dimethoate                                       | (60-51-5)              |
| 286 | Dimethoate metabolite Desmethyl Dimethoate       | (na)                   |
| 287 | Dimethoate metabolite Dimethoate carboxylic acid | (1113-01-5)            |
| 288 | Dimethomorph                                     | (110488-70-5)          |
| 289 | Dimethylanilin (N.N-)                            | (121-69-7)             |
| 290 | Dimethylphthalate                                | (131-11-3)             |
| 291 | Dimethylvinphos                                  | (2274-67-1)            |
| 292 | Dimetilan                                        | (644-64-4)             |
| 293 | Dimoxystrobin                                    | (149961-52-4)          |
| 294 | Dinex (2-Cyclohexyl-4.6-dinitrophenol)           | (131-89-5)             |
| 295 | Diniconazole                                     | (83657-24-3)           |
| 296 | Dinitramine                                      | (29091-05-2)           |
| 297 | Dinobuton                                        | (973-21-7)             |
| 298 | Dinocap                                          | (39300-45-3)           |
| 299 | Dinocap-Meptyl Ester NH4-adduct                  | (131-72-6 / 6119-92-2) |
| 300 | Dinocap-Meptyl Phenol                            | (3687-22-7)            |
| 301 | Dinoseb                                          | (88-85-7)              |
| 302 | Dinotefuran                                      | (165252-70-0)          |
| 303 | Dinoterb                                         | (1420-07-1)            |
| 304 | Dioxacarb                                        | (6988-21-2)            |
| 305 | Dioxathion                                       | (78-34-2)              |
| 306 | Diphacinone                                      | (82-66-6)              |
| 307 | Diphenamid                                       | (957-51-7)             |
| 308 | Diphenylamine                                    | (122-39-4)             |
| 309 | Diphenylamine N-Nitroso-                         | (86-30-6)              |
| 310 | Dipropetryn                                      | (4147-51-7)            |
| 311 | Diquat                                           | (2764-72-9)            |
| 312 | Disulfiram                                       | (97-77-8)              |
| 313 | Disulfoton                                       | (298-04-4)             |
| 314 | Disulfoton-sulfone                               | (2497-06-5)            |
| 315 | Disulfoton-sulfoxid                              | (2497-07-6)            |
| 316 | Ditalimfos                                       | (5131-24-8)            |
| 317 | Dithianon                                        | (3347-22-6)            |
| 318 | Dithiopyr                                        | (97886-45-8)           |
| 319 | Diuron                                           | (330-54-1)             |
| 320 | Diuron D6                                        | (1007536-67-5)         |



|     |                                                       |               |
|-----|-------------------------------------------------------|---------------|
| 321 | DMSA                                                  | (4710-17-2)   |
| 322 | Dodemorph                                             | (1593-77-7)   |
| 323 | Dodine                                                | (2439-10-3)   |
| 324 | Doramectin                                            | (117704-25-3) |
| 325 | Drazoxolon                                            | (5707-69-7)   |
| 326 | Edifenphos                                            | (17109-49-8)  |
| 327 | Enamectin                                             | (119791-41-2) |
| 328 | Endosulfan                                            | (115-29-7)    |
| 329 | Endosulfan-sulfate                                    | (1031-07-8)   |
| 330 | Endothal                                              | (145-73-3)    |
| 331 | EPN                                                   | (2104-64-5)   |
| 332 | Epoxiconazole                                         | (133855-98-8) |
| 333 | Eprinomectin                                          | (123997-26-2) |
| 334 | EPTC                                                  | (759-94-4)    |
| 335 | Esprocarb                                             | (85785-20-2)  |
| 336 | Etaconazole                                           | (60207-93-4)  |
| 337 | Ethaboxam                                             | (162650-77-3) |
| 338 | Ethametsulfuron-methyl                                | (97780-06-8)  |
| 339 | Ethidimuron                                           | (30043-49-3)  |
| 340 | Ethiofencarb                                          | (29973-13-5)  |
| 341 | Ethiofencarb-sulfone                                  | (53380-23-7)  |
| 342 | Ethiofencarb-sulfoxide                                | (53380-22-6)  |
| 343 | Ethiolate                                             | (2941-55-1)   |
| 344 | Ethion                                                | (563-12-2)    |
| 345 | Ethiprole                                             | (181587-01-9) |
| 346 | Ethirimol                                             | (23947-60-6)  |
| 347 | Ethofumesate                                          | (26225-79-6)  |
| 348 | Ethoprophos. Ethoprop                                 | (13194-48-4)  |
| 349 | Ethoxy-1-2-3-4-tetra-hydro-2-2-4-trimethylchinolin 6- | (16489-90-0)  |
| 350 | Ethoxyquin                                            | (91-53-2)     |
| 351 | Etobenzanid                                           | (79540-50-4)  |
| 352 | Etopenprox                                            | (80844-07-1)  |
| 353 | Etoxazole                                             | (153233-91-1) |
| 354 | Etrimfos                                              | (38260-54-7)  |
| 355 | Famoxadone                                            | (131807-57-3) |
| 356 | Famphur                                               | (52-85-7)     |
| 357 | Fenamidone                                            | (161326-34-7) |
| 358 | Fenamiphos                                            | (22224-92-6)  |
| 359 | Fenamiphos - sulfone                                  | (31972-44-8)  |
| 360 | Fenamiphos sulfoxide                                  | (31972-43-7)  |

|     |                               |               |
|-----|-------------------------------|---------------|
| 361 | Fenarimol                     | (60168-88-9)  |
| 362 | Fenazaquin                    | (120928-09-8) |
| 363 | Fenbuconazole                 | (114369-43-6) |
| 364 | Fenbutatin Oxide              | (13356-08-6)  |
| 365 | Fenclofos.Ronnel              | (299-84-3)    |
| 366 | Fenfuram                      | (24691-80-3)  |
| 367 | Fenhexamid                    | (126833-17-8) |
| 368 | Fenitrothion                  | (122-14-5)    |
| 369 | Fenobucarb                    | (3766-81-2)   |
| 370 | Fenothiocarb                  | (62850-32-2)  |
| 371 | Fenoxanil                     | (115852-48-7) |
| 372 | Fenoxaprop-ethyl              | (66441-23-4)  |
| 373 | Fenoxycarb                    | (79127-80-3)  |
| 374 | Fenpiclonil                   | (74738-17-3)  |
| 375 | Fenpropathrin                 | (39515-41-8)  |
| 376 | Fenpropidin                   | (67306-00-7)  |
| 377 | Fenpropimorph                 | (67564-91-4)  |
| 378 | Fenpropimorph Carboxylic Acid | (121098-45-1) |
| 379 | Fenpyrazamine                 | (473798-59-3) |
| 380 | Fenpyroximate                 | (134098-61-6) |
| 381 | Fenson                        | (80-38-6)     |
| 382 | Fensulfothion                 | (115-90-2)    |
| 383 | Fensulfothion-oxon            | (6552-21-2)   |
| 384 | Fensulfothion-sulfon          | (14255-72-2)  |
| 385 | Fenthion                      | (55-38-9)     |
| 386 | Fenthion-oxon                 | (6552-12-1)   |
| 387 | Fenthion-oxonsulfone          | (14086-35-2)  |
| 388 | Fenthion-oxonsulfoxide        | (6552-13-2)   |
| 389 | Fenthion-sulfon               | (3761-42-0)   |
| 390 | Fenthion-sulfoxide            | (3761-41-9)   |
| 391 | Fenuron                       | (101-42-8)    |
| 392 | Fenvalerate                   | (51630-58-1)  |
| 393 | Ferimzone                     | (89269-64-7)  |
| 394 | Fipronil                      | (120068-37-3) |
| 395 | Fipronil-Desulfinyl           | (205650-65-3) |
| 396 | Fipronil-sulfide              | (120067-83-6) |
| 397 | Fipronilsulfone               | (120068-36-2) |
| 398 | Flamprop                      | (58667-63-3)  |
| 399 | Flamprop-isopropyl            | (52756-22-6)  |
| 400 | Flamprop-methyl               | (52756-25-9)  |
| 401 | Flazasulfuron                 | (104040-78-0) |

|     |                                                                       |               |
|-----|-----------------------------------------------------------------------|---------------|
| 402 | Flocoumafene                                                          | (90035-08-8)  |
| 403 | Flonicamid                                                            | (158062-67-0) |
| 404 | Flonicamid metabolite TFNA-AM                                         | (158062-71-6) |
| 405 | Flonicamid metabolite TFNG                                            | (207502-65-6) |
| 406 | Florasulam                                                            | (145701-23-1) |
| 407 | Fluacrypyrim                                                          | (229977-93-9) |
| 408 | Fluazifop-P-Butyl metabolite CGA 142110                               | (33252-63-0)  |
| 409 | Fluazinam                                                             | (79622-59-6)  |
| 410 | Fluazuron                                                             | (86811-58-7)  |
| 411 | Flubendiamide                                                         | (272451-65-7) |
| 412 | Flubenzimine                                                          | (37893-02-0)  |
| 413 | Flucarbazone                                                          | (145026-88-6) |
| 414 | Fluchloralin                                                          | (33245-39-5)  |
| 415 | Flucycloxuron                                                         | (113036-88-7) |
| 416 | Flucythrinate                                                         | (70124-77-5)  |
| 417 | Fludioxonil                                                           | (131341-86-1) |
| 418 | Flufenacet                                                            | (142459-58-3) |
| 419 | Flufenacet sulfonic acid (FOE 5043-sulfonic acid)                     | (947601-87-8) |
| 420 | Flufenacet thioglycolate sulfoxide (FOE 5043 thioglycolate sulfoxide) | (201668-33-9) |
| 421 | Flufenacet-oxalate (FOE 5043-oxalate)                                 | (201668-31-7) |
| 422 | Flufenoxuron                                                          | (101463-69-8) |
| 423 | Flumequine                                                            | (42835-25-6)  |
| 424 | Flumethrin                                                            | (69770-45-2)  |
| 425 | Flumetsulam                                                           | (98967-40-9)  |
| 426 | Flumiclorac-pentyl                                                    | (87546-18-7)  |
| 427 | Flumioxazin                                                           | (103361-09-7) |
| 428 | Fluometuron                                                           | (2164-17-2)   |
| 429 | Fluopicolide                                                          | (239110-15-7) |
| 430 | Fluopyram                                                             | (658066-35-4) |
| 431 | Fluoroglycofen-ethyl                                                  | (77501-90-7)  |
| 432 | Fluotrimazole                                                         | (31251-03-3)  |
| 433 | Fluoxastrobin                                                         | (361377-29-9) |
| 434 | Flupyradifurone                                                       | (951659-40-8) |
| 435 | Fluquinconazole                                                       | (136426-54-5) |
| 436 | Fluridone                                                             | (59756-60-4)  |
| 437 | Flurochloridone                                                       | (61213-25-0)  |
| 438 | Fluroxypyr                                                            | (69377-81-7)  |
| 439 | Flurprimidol                                                          | (56425-91-3)  |
| 440 | Flurtamone                                                            | (96525-23-4)  |
| 441 | Flusilazole                                                           | (85509-19-9)  |

|     |                               |               |
|-----|-------------------------------|---------------|
| 442 | Flusulfamide                  | (106917-52-6) |
| 443 | Fluthiacet-methyl             | (117337-19-6) |
| 444 | Flutolanil                    | (66332-96-5)  |
| 445 | Flutriafol                    | (76674-21-0)  |
| 446 | Fluvalinate (tau-)            | (102851-06-9) |
| 447 | Fluxapyroxad                  | (907204-31-3) |
| 448 | Folpet                        | (133-07-3)    |
| 449 | Fomesafen                     | (72178-02-0)  |
| 450 | Fonofos                       | (944-22-9)    |
| 451 | Foramsulfuron                 | (173159-57-4) |
| 452 | Forchlorfenuron               | (68157-60-8)  |
| 453 | Formetanate                   | (22259-30-9)  |
| 454 | Formothion                    | (2540-82-1)   |
| 455 | Fosthiazate                   | (98886-44-3)  |
| 456 | Fuberidazole                  | (3878-19-1)   |
| 457 | Furalaxyl                     | (57646-30-7)  |
| 458 | Furametpyr                    | (123572-88-3) |
| 459 | Furathiocarb                  | (65907-30-4)  |
| 460 | Furilazole                    | (121776-33-8) |
| 461 | Furmecyclox                   | (60568-05-0)  |
| 462 | Gibberellic acid              | (77-06-5)     |
| 463 | Glufosinate                   | (51276-47-2)  |
| 464 | Griseofulvin                  | (126-07-8)    |
| 465 | Halfenprox                    | (111872-58-3) |
| 466 | Halofenozide                  | (112226-61-6) |
| 467 | Halosulfuron-methyl           | (100784-20-1) |
| 468 | Heptenophos                   | (23560-59-0)  |
| 469 | Hexaconazole                  | (79983-71-4)  |
| 470 | Hexaflumuron                  | (86479-06-3)  |
| 471 | Hexazinone                    | (51235-04-2)  |
| 472 | Hexythiazox                   | (78587-05-0)  |
| 473 | Homobrassinolide 22(S)-23(S)- | (80483-89-2)  |
| 474 | Hydramethylnon                | (67485-29-4)  |
| 475 | Hymexazol                     | (10004-44-1 ) |
| 476 | Icaridin                      | (119515-38-7) |
| 477 | Imazalil                      | (35554-44-0)  |
| 478 | Imazamethabenz-methyl         | (81405-85-8)  |
| 479 | Imazamox                      | (114311-32-9) |
| 480 | Imazapic                      | (104098-48-8) |
| 481 | Imazapyr                      | (81334-34-1)  |
| 482 | Imazaquin                     | (81335-37-7)  |

|     |                                         |                |
|-----|-----------------------------------------|----------------|
| 483 | Imazethapyr                             | (81335-77-5)   |
| 484 | Imazosulfuron                           | (122548-33-8 ) |
| 485 | Imibenconazole                          | (86598-92-7)   |
| 486 | Imidacloprid                            | (138261-41-3)  |
| 487 | Imiprothrin                             | (72963-72-5)   |
| 488 | Inabenfide                              | (82211-24-3)   |
| 489 | Indanofan                               | (133220-30-1)  |
| 490 | Indole-3-butyric acid                   | (133-32-4)     |
| 491 | Indolyl-acetic-acid-ethyl-ester 3-      | (778-82-5)     |
| 492 | Indoxacarb                              | (173584-44-6)  |
| 493 | Iodocarb                                | (55406-53-6)   |
| 494 | Iodofenphos (Jodfenphos)                | (18181-70-9)   |
| 495 | Iodophenoxyacetic acid 4-               | (1878-94-0)    |
| 496 | Iodosulfuron-methyl                     | (144550-36-7)  |
| 497 | Ioxynil                                 | (1689-83-4)    |
| 498 | Ipconazole                              | (125225-28-7)  |
| 499 | Iprobenfos                              | (26087-47-8)   |
| 500 | Iprodione                               | (36734-19-7)   |
| 501 | Iprodione metabolite RP 30228           | (na)           |
| 502 | Iprovalicarb                            | (140923-17-7)  |
| 503 | Isazophos                               | (42509-80-8)   |
| 504 | Isocarbamid (Azolamide)                 | (30979-48-7)   |
| 505 | Isocarbophos                            | (24353-61-5)   |
| 506 | Isofenphos                              | (25311-71-1)   |
| 507 | Isofenphos-methyl                       | (99675-03-3)   |
| 508 | Isofenphos-Oxon                         | (31120-85-1)   |
| 509 | Isomethiozin                            | (57052-04-7)   |
| 510 | Isoproc carb                            | (2631-40-5)    |
| 511 | Isopropalin                             | (33820-53-0)   |
| 512 | Isoprothiolane                          | (50512-35-1)   |
| 513 | Isoproturon                             | (34123-59-6)   |
| 514 | Isoproturon D6                          | (217487-17-7)  |
| 515 | Isopyrazam                              | (881685-58-1)  |
| 516 | Isothiazolin-3-one 2-Methyl-4-          | (2682-20-4)    |
| 517 | Isothiazolin-3-one 5-Chloro-2-methyl-4- | (26172-55-4)   |
| 518 | Isotianil                               | (224049-04-1)  |
| 519 | Isoxaben                                | (82558-50-7)   |
| 520 | Isoxadifen-ethyl                        | (163520-33-0)  |
| 521 | Isoxaflutole                            | (141112-29-0)  |
| 522 | Isoxathion                              | (18854-01-8)   |

|     |                                           |                                           |
|-----|-------------------------------------------|-------------------------------------------|
| 523 | Ivermectin                                | (70288-86-7 (70161-11-4 +<br>70209-81-3)) |
| 524 | Karbutilate                               | (4849-32-5)                               |
| 525 | KIF-3535-M-31 (metabolite of Mepanipyrim) | ()                                        |
| 526 | Kinetin                                   | (525-79-1)                                |
| 527 | Kresoxim-methyl                           | (143390-89-0)                             |
| 528 | Kresoxim-Methyl metabolite BF 490-1       | (137169-29-0)                             |
| 529 | Lactofen                                  | (77501-63-4)                              |
| 530 | Lenacil                                   | (2164-08-1)                               |
| 531 | Leptophos                                 | (21609-90-5)                              |
| 532 | Lethane 384                               | (112-56-1)                                |
| 533 | Linuron                                   | (330-55-2)                                |
| 534 | Lufenuron                                 | (103055-07-8)                             |
| 535 | Malaoxon                                  | (1634-78-2)                               |
| 536 | Malathion                                 | (121-75-5)                                |
| 537 | Maleic Hydrazide                          | (123-33-1)                                |
| 538 | Mandestrobin                              | (173662-97-0)                             |
| 539 | Mandipropamid                             | (374726-62-2)                             |
| 540 | MCPA-Butoxyethyl-ester                    | (19480-43-4)                              |
| 541 | Mecarbam                                  | (2595-54-2)                               |
| 542 | Mefenacet                                 | (73250-68-7)                              |
| 543 | Mefenpyr-diethyl                          | (135590-91-9)                             |
| 544 | Mefluidide                                | (53780-34-0)                              |
| 545 | Melamine                                  | (108-78-1)                                |
| 546 | Mepanipyrim                               | (110235-47-7)                             |
| 547 | Mepanipyrim metabolite KIF-3535-M-31      | (204571-52-8)                             |
| 548 | Mephosfolan                               | (950-10-7)                                |
| 549 | Mepiquat 4-Hydroxy (Piperidinium)         | (na)                                      |
| 550 | Mepronil                                  | (55814-41-0)                              |
| 551 | Mercaptobenzothiazole                     | (149-30-4)                                |
| 552 | Merphos                                   | (150-50-5)                                |
| 553 | Mesosulfuron-methyl                       | (208465-21-8)                             |
| 554 | Mesotrione                                | (104206-82-8)                             |
| 555 | Mesotrione metabolite AMBA                | (393085-45-5)                             |
| 556 | Metaflumizone                             | (139968-49-3)                             |
| 557 | Metalaxyl                                 | (57837-19-1)                              |
| 558 | Metalaxyl metabolite CGA 107955           | (104390-55-8)                             |
| 559 | Metalaxyl metabolite CGA 108905           | (na)                                      |
| 560 | Metalaxyl metabolite CGA 67869            | (66637-79-4)                              |
| 561 | Metalaxyl metabolite CGA 94689            | (na)                                      |
| 562 | Metamitron                                | (41394-05-2)                              |

|     |                                                                      |                |
|-----|----------------------------------------------------------------------|----------------|
| 563 | Metazachlor                                                          | (67129-08-2)   |
| 564 | Metconazole                                                          | (125116-23-6)  |
| 565 | Methabenzthiazuron                                                   | (18691-97-9)   |
| 566 | Methacrifos                                                          | (62610-77-9)   |
| 567 | Methamidophos                                                        | (10265-92-6)   |
| 568 | Methfuroxam                                                          | (28730-17-8)   |
| 569 | Methidathion                                                         | (950-37-8)     |
| 570 | Methiocarb (Mercaptodimethur)                                        | (2032-65-7)    |
| 571 | Methiocarb-sulfone                                                   | (2179-25-1)    |
| 572 | Methiocarb-sulfoxide                                                 | (2635-10-1)    |
| 573 | Methomyl                                                             | (16752-77-5)   |
| 574 | Methomyl D3                                                          | (1398109-07-3) |
| 575 | Methoprene                                                           | (40596-69-8)   |
| 576 | Methoprotryne                                                        | (841-06-5)     |
| 577 | Methothrin                                                           | (34388-29-9)   |
| 578 | Methoxyfenozone                                                      | (161050-58-4)  |
| 579 | Metobromuron                                                         | (3060-89-7)    |
| 580 | Metolachlor                                                          | (51218-45-2)   |
| 581 | Metolachlor D6                                                       | (1219803-97-0) |
| 582 | Metolcarb                                                            | (1129-41-5)    |
| 583 | Metominostrobin                                                      | (133408-51-2)  |
| 584 | Metosulam                                                            | (139528-85-1)  |
| 585 | Metoxuron                                                            | (19937-59-8)   |
| 586 | Metrafenone                                                          | (220899-03-6)  |
| 587 | Metribuzin                                                           | (21087-64-9)   |
| 588 | Metsulfuron-methyl                                                   | (74223-64-6)   |
| 589 | Mevinphos                                                            | (26718-65-0)   |
| 590 | Mexacarbate                                                          | (315-18-4)     |
| 591 | MGK-264                                                              | (113-48-4)     |
| 592 | Milbemectin A4                                                       | (51596-11-3)   |
| 593 | Molinate                                                             | (2212-67-1)    |
| 594 | Monalide                                                             | (7287-36-7)    |
| 595 | Monocrotophos                                                        | (6923-22-4)    |
| 596 | Monolinuron                                                          | (1746-81-2)    |
| 597 | Monuron                                                              | (150-68-5)     |
| 598 | Moxidectin                                                           | (113507-06-5)  |
| 599 | Myclobutanil                                                         | (88671-89-0)   |
| 600 | N,N-Dimethyl-N'-p-tolylsulphamide (DMST.<br>metabolite tolylfluanid) | (66840-71-9)   |
| 601 | N-2-4-Dimethylphenylformamide (DMF. Metabolite<br>Amitraz)           | (60397-77-5)   |

|     |                                       |               |
|-----|---------------------------------------|---------------|
| 602 | Naled                                 | (300-76-5)    |
| 603 | Naphthalene acetamide                 | (86-86-2)     |
| 604 | Naphthoxyaceticacid (beta-)           | (120-23-0)    |
| 605 | Naproanilide                          | (52570-16-8)  |
| 606 | Napropamide                           | (15299-99-7)  |
| 607 | Naptalam (N-1-Naphthylphthalamicacid) | (132-66-1)    |
| 608 | Neburon                               | (555-37-3)    |
| 609 | Nicosulfuron                          | (111991-09-4) |
| 610 | Nicotine                              | (54-11-5)     |
| 611 | Nitenpyram                            | (150824-47-8) |
| 612 | Nitralin                              | (4726-14-1)   |
| 613 | Nitrofen                              | (1836-75-5)   |
| 614 | Nitroguaiacol 5-                      | (na)          |
| 615 | Nitrothal-isopropyl                   | (10552-74-6)  |
| 616 | Norflurazon                           | (27314-13-2)  |
| 617 | Norflurazon Desmethyl                 | (23576-24-1)  |
| 618 | Novaluron                             | (116714-46-6) |
| 619 | Noviflumuron                          | (121451-02-3) |
| 620 | Nuarimol                              | (63284-71-9)  |
| 621 | Octhilinone                           | (26530-20-1)  |
| 622 | Ofurace                               | (58810-48-3)  |
| 623 | Omethoate                             | (1113-02-6)   |
| 624 | Orbencarb                             | (34622-58-7)  |
| 625 | Orthosulfamuron                       | (213464-77-8) |
| 626 | Oryzalin                              | (19044-88-3)  |
| 627 | Oxabetrinil                           | (94593-79-0)  |
| 628 | Oxadiargyl                            | (39807-15-3)  |
| 629 | Oxadiazon                             | (19666-30-9)  |
| 630 | Oxadixyl                              | (77732-09-3)  |
| 631 | Oxamyl                                | (23135-22-0)  |
| 632 | Oxamyl oxime                          | (30558-43-1)  |
| 633 | Oxasulfuron                           | (144651-06-9) |
| 634 | Oxaziclomefone                        | (153197-14-9) |
| 635 | Oxfendazole                           | (53716-50-0)  |
| 636 | Oxycarboxin                           | (5259-88-1)   |
| 637 | Oxydemeton Methyl Sulfone             | ( 17040-19-6) |
| 638 | Oxyfluorfen                           | (42874-03-3)  |
| 639 | p.p-Dichlorobenzophenone              | (90-98-2)     |
| 640 | Paclobutrazole                        | (76738-62-0)  |
| 641 | Paraoxon                              | (311-45-5)    |
| 642 | Paraoxon-methyl                       | (950-35-6)    |



|     |                                        |                |
|-----|----------------------------------------|----------------|
| 643 | Parathion                              | (56-38-2)      |
| 644 | Parathion-methyl                       | (298-00-0)     |
| 645 | Pebulate                               | (1114-71-2)    |
| 646 | Penconazole                            | (66246-88-6)   |
| 647 | Pencycuron                             | (66063-05-6)   |
| 648 | Pendimethalin                          | (40487-42-1)   |
| 649 | Penflufen                              | (494793-67-8)  |
| 650 | Penfluron                              | (35367-31-8)   |
| 651 | Penoxsulam                             | (219714-96-2)  |
| 652 | Pentachlorophenol. PCP                 | (87-86-5)      |
| 653 | Pentanochlor                           | (2307-68-8)    |
| 654 | Penthiopyrad                           | (183675-82-3)  |
| 655 | Pentoxazone                            | (110956-75-7)  |
| 656 | Permethrin                             | (52645-53-1)   |
| 657 | Permethrin (cis-)                      | (61949-76-6)   |
| 658 | Pethoxamid                             | (106700-29-2)  |
| 659 | Pethoxamide metabolite MET-42          | (na)           |
| 660 | Phenmedipham                           | (13684-63-4)   |
| 661 | Phenmedipham metabolite MHPC           | (13683-89-1)   |
| 662 | Phenothrin                             | (26002-80-2)   |
| 663 | Phenthoate                             | (2597-03-7)    |
| 664 | Phorate                                | (298-02-2)     |
| 665 | Phorate-oxon                           | (2600-69-3)    |
| 666 | Phorate-oxon-sulfone                   | (2588-06-9)    |
| 667 | Phorate-oxon-sulfoxide                 | (2588-05-8)    |
| 668 | Phorate-sulfone                        | (2588-04-7)    |
| 669 | Phorate-sulfoxide                      | (2588-03-6)    |
| 670 | Phosalone                              | (2310-17-0)    |
| 671 | Phosmet                                | (732-11-6)     |
| 672 | Phosmet-oxon                           | (3735-33-9)    |
| 673 | Phosphamidon (Dimecron)                | (13171-21-6)   |
| 674 | Phoxim                                 | (14816-18-3)   |
| 675 | Picolinafen                            | (137641-05-5)  |
| 676 | Picolinicacid-methyl-ester 6-Chloro-2- | (6636-55-1)    |
| 677 | Picoxystrobin                          | (117428-22-5)  |
| 678 | Pindone                                | (83-26-1)      |
| 679 | Pinoxaden                              | (243973-20-8)  |
| 680 | Piperonylbutoxide                      | (51-03-6)      |
| 681 | Piperophos                             | (24151-93-7)   |
| 682 | Pirimicarb                             | (23103-98-2)   |
| 683 | Pirimicarb D6                          | (1015854-66-6) |

|     |                                 |               |
|-----|---------------------------------|---------------|
| 684 | Pirimicarb Desmethyl            | (30614-22-3)  |
| 685 | Pirimicarb Desmethylformamido-  | (27218-04-8)  |
| 686 | Pirimiphos-ethyl                | (23505-41-1)  |
| 687 | Pirimiphos-methyl               | (29232-93-7)  |
| 688 | Prallethrin                     | (23031-36-9)  |
| 689 | Pretilachlor                    | (51218-49-6)  |
| 690 | Primisulfuron-methyl            | (86209-51-0)  |
| 691 | Probenazole                     | (27605-76-1)  |
| 692 | Prochloraz                      | (67747-09-5)  |
| 693 | Prochloraz metabolite BTS 44595 | (139520-94-8) |
| 694 | Prochloraz metabolite BTS 44596 | (na)          |
| 695 | Prochloraz metabolite BTS 9608  | (na)          |
| 696 | Procymidone                     | (32809-16-8)  |
| 697 | Profenophos                     | (41198-08-7)  |
| 698 | Profoxydim                      | (139001-49-3) |
| 699 | Prohexadione                    | (88805-35-0)  |
| 700 | Promecarb                       | (2631-37-0)   |
| 701 | Prometon                        | (1610-18-0)   |
| 702 | Prometryn (Caparol)             | (7287-19-6)   |
| 703 | Propachlor                      | (1918-16-7)   |
| 704 | Propamocarb                     | (24579-73-5)  |
| 705 | Propamocarb-N-oxide             | (na)          |
| 706 | Propanil                        | (709-98-8)    |
| 707 | Propaphos                       | (7292-16-2)   |
| 708 | Propargite                      | (2312-35-8)   |
| 709 | Propazine                       | (139-40-2)    |
| 710 | Propetamphos                    | (31218-83-4)  |
| 711 | Propham                         | (122-42-9)    |
| 712 | Propiconazole                   | (60207-90-1)  |
| 713 | Propionic acid 3-(3-Indolyl)-   | (830-96-6)    |
| 714 | Propoxur                        | (114-26-1)    |
| 715 | Propoxycarbazone                | (145026-81-9) |
| 716 | Propyzamide (Pronamide)         | (23950-58-5)  |
| 717 | Proquinazid                     | (189278-12-4) |
| 718 | Prosulfocarb                    | (52888-80-9)  |
| 719 | Prosulfuron                     | (94125-34-)   |
| 720 | Prothioconazole                 | (178928-70-6) |
| 721 | Prothioconazole desthio         | (120983-64-4) |
| 722 | Prothiofos (Tokuthion)          | (34643-46-4)  |
| 723 | Prothoate                       | (2275-18-5)   |
| 724 | Pymetrozine                     | (123312-89-0) |

|     |                                           |               |
|-----|-------------------------------------------|---------------|
| 725 | Pyracarbolid                              | (24691-76-7)  |
| 726 | Pyraclofos                                | (77458-01-6)  |
| 727 | Pyraclostrobin                            | (175013-18-0) |
| 728 | Pyraflufen-ethyl                          | (129630-19-9) |
| 729 | Pyrasulfotole                             | (365400-11-9) |
| 730 | Pyrazolynate                              | (58011-68-0)  |
| 731 | Pyrazophos                                | (13457-18-6)  |
| 732 | Pyrazoxyfen                               | (71561-11-0)  |
| 733 | Pyrethrin                                 | (121-21-1)    |
| 734 | Pyrethrins: Cinerin                       | (25402-06-6)  |
| 735 | Pyrethrins: Jasmolin                      | (4466-14-2)   |
| 736 | Pyribenzoxim                              | (168088-61-7) |
| 737 | Pyributicarb                              | (88678-67-5)  |
| 738 | Pyridaben                                 | (96489-71-3)  |
| 739 | Pyridafenthion                            | (119-12-0)    |
| 740 | Pyridafol                                 | (40020-01-7)  |
| 741 | Pyridalyl                                 | (179101-81-6) |
| 742 | Pyridate                                  | (55512-33-9)  |
| 743 | Pyrifenox                                 | (88283-41-4)  |
| 744 | Pyrifluquinazon                           | (337458-27-2) |
| 745 | Pyriftalid                                | (135186-78-6) |
| 746 | Pyrimethanil                              | (53112-28-0)  |
| 747 | Pyrimidifen                               | (105779-78-0) |
| 748 | Pyriminobac-methyl                        | (136191-64-5) |
| 749 | Pyrimisulfan                              | (221205-90-9) |
| 750 | Pyriofenone                               | (688046-61-9) |
| 751 | Pyriproxyfen                              | (95737-68-1)  |
| 752 | Pyroquilon                                | (57369-32-1)  |
| 753 | Pyroxsulam                                | (422556-08-9) |
| 754 | Quinalphos                                | (13593-03-8)  |
| 755 | Quinclorac                                | (84087-01-4)  |
| 756 | Quinmerac                                 | (90717-03-6)  |
| 757 | Quinoclamine                              | (2797-51-1)   |
| 758 | Quinolinol 1-2-Dihydro-2-2-4-trimethyl-6- | (na)          |
| 759 | Quinolinone 2-2-4-Trimethyl-6(2H)-        | (na)          |
| 760 | Quinoxiphen                               | (124495-18-7) |
| 761 | Rabenzazole                               | (40341-04-6)  |
| 762 | Resmethrin                                | (10453-86-8)  |
| 763 | Rimsulfuron                               | (122931-48-0) |
| 764 | Rotenone                                  | (83-79-4)     |
| 765 | Saflufenacil                              | (372137-35-4) |

|     |                                  |                                   |
|-----|----------------------------------|-----------------------------------|
| 766 | Saflufenacil Didesmethyl-        | (na)                              |
| 767 | Saflufenacil M800H11             | (na)                              |
| 768 | Saflufenacil M800H35             | (na)                              |
| 769 | Saflufenacil Metabolite M800H35  | (1246768-31-9)                    |
| 770 | Schradan                         | (152-16-9)                        |
| 771 | Sebuthylazine                    | (7286-69-3)                       |
| 772 | Secbumeton                       | (26259-45-0)                      |
| 773 | Sedaxane                         | (874967-67-6)                     |
| 774 | Sethoxydim                       | (74051-80-2)                      |
| 775 | Siduron                          | (1982-49-6)                       |
| 776 | Silafluofen                      | (105024-66-6)                     |
| 777 | Silthiofam                       | (175217-20-6)                     |
| 778 | Simazine                         | (122-34-9)                        |
| 779 | Simazine 2-Hydroxy               | (2599-11-3)                       |
| 780 | Simeconazole                     | (149508-90-7)                     |
| 781 | Simetryn                         | (1014-70-6)                       |
| 782 | Spinetoram                       | (187166-40-1)                     |
| 783 | Spinosad A                       | (168316-95-8. 131929-60-7)        |
| 784 | Spinosad D                       | (168316-95-8. 131929-63-0)        |
| 785 | Spinosyn B or K                  | (168316-95-8. 131929-63-0<br>(B)) |
| 786 | Spirodiclofen                    | (148477-71-8)                     |
| 787 | Spiromesifen                     | (283594-90-1)                     |
| 788 | Spirotetramate                   | (203313-25-1)                     |
| 789 | Spirotetramate-enol              | (203312-38-3)                     |
| 790 | Spirotetramate-enol-glucoside    | (1172614-86-6 )                   |
| 791 | Spirotetramate-keto-hydroxy      | (1172134-11-0 )                   |
| 792 | Spirotetramate-mono-hydroxy      | (1172134-12-1 )                   |
| 793 | Spiroxamine                      | (118134-30-8)                     |
| 794 | Sulcotrione                      | (99105-77-8)                      |
| 795 | Sulcotrione metabolite CMBA      | (na)                              |
| 796 | Sulfanilamide                    | (63-74-1)                         |
| 797 | Sulfentrazone                    | (122836-35-5)                     |
| 798 | Sulfometuron-methyl              | (74222-97-2)                      |
| 799 | Sulfosulfuron                    | (141776-32-1)                     |
| 800 | Sulfotepp                        | (3689-24-5)                       |
| 801 | Sulfoxaflor                      | (946578-00-3)                     |
| 802 | Sulprofos (Bolstar)              | (35400-43-2)                      |
| 803 | SWEP.MCC                         | (1918-18-9)                       |
| 804 | TBSA Triflurosulfuron metabolite | (1869-24-5)                       |
| 805 | TCMTB                            | (21564-17-0)                      |

|     |                              |               |
|-----|------------------------------|---------------|
| 806 | Tebuconazole                 | (107534-96-3) |
| 807 | Tebuconazole D6              | (na)          |
| 808 | Tebufenozide                 | (112410-23-8) |
| 809 | Tebufenpyrad                 | (119168-77-3) |
| 810 | Tebupirimphos                | (96182-53-5)  |
| 811 | Tebutame                     | (35256-85-0)  |
| 812 | Tebuthiuron                  | (34014-18-1)  |
| 813 | Tecloftalam                  | (76280-91-6)  |
| 814 | Teflubenzuron                | (83121-18-0)  |
| 815 | Tefluthrin                   | (79538-32-2)  |
| 816 | Tembotrione                  | (335104-84-2) |
| 817 | Temephos                     | (3383-96-8)   |
| 818 | TEPP                         | (107-49-3)    |
| 819 | Tepraloxydim                 | (149979-41-9) |
| 820 | Terbacil                     | (5902-51-2)   |
| 821 | Terbufos                     | (13071-79-9)  |
| 822 | Terbufos-Oxon-sulfone        | (na?)         |
| 823 | Terbufos-Oxon-sulfoxide      | (56165-57-2)  |
| 824 | Terbufossulfone              | (56070-16-7)  |
| 825 | Terbufos-sulfoxid            | (10548-10-4)  |
| 826 | Terbumeton                   | (33693-04-8)  |
| 827 | Terbuthylazine               | (5915-41-3)   |
| 828 | Terbuthylazine-Desethyl      | (30125-63-4)  |
| 829 | Terbutryn                    | (886-50-0)    |
| 830 | Tetrachlorvinphos (Stirofos) | (22248-79-9)  |
| 831 | Tetraconazole                | (112281-77-3) |
| 832 | Tetradifon                   | (116-29-0)    |
| 833 | Tetramethrin                 | (7696-12-0)   |
| 834 | TFNA (metabolite flonicamid) | (158063-66-2) |
| 835 | Thenylchlor                  | (96491-05-3)  |
| 836 | Thiabendazole                | (148-79-8)    |
| 837 | Thiabendazole-5-hydroxy      | (948-71-0)    |
| 838 | Thiacloprid                  | (111988-49-9) |
| 839 | Thiamethoxam                 | (153719-23-4) |
| 840 | Thiazafluron                 | (25366-23-8)  |
| 841 | Thiazopyr                    | (117718-60-2) |
| 842 | Thidiazuron                  | (51707-55-2)  |
| 843 | Thiencarbazone-methyl        | (317815-83-1) |
| 844 | Thifensulfuron-methyl        | (79277-27-3)  |
| 845 | Thifluzamide                 | (130000-40-7) |
| 846 | Thiobencarb                  | (28249-77-6)  |

|     |                                           |               |
|-----|-------------------------------------------|---------------|
| 847 | Thiocyclam                                | (31895-21-3)  |
| 848 | Thiodicarb                                | (59669-26-0)  |
| 849 | Thiofanox                                 | (39196-18-4)  |
| 850 | Thiofanox sulfone                         | (39184-59-3)  |
| 851 | Thiofanox sulfoxide                       | (39184-27-5)  |
| 852 | Thiomethon                                | (640-15-3)    |
| 853 | Thionazin (Zinophos)                      | (297-97-2)    |
| 854 | Thiophanate-methyl                        | (23564-05-8)  |
| 855 | Thiophanat-ethyl                          | (23564-06-9)  |
| 856 | Thiosultap                                | (98968-92-4)  |
| 857 | Thiram (Tetramethylthiuramdisulfide.TMTD) | (137-26-8)    |
| 858 | Tiocarbazil                               | (36756-79-3)  |
| 859 | Tolclofos-methyl                          | (57018-04-9)  |
| 860 | Tolfenpyrad                               | (129558-76-5) |
| 861 | Tolyfluanid                               | (731-27-1)    |
| 862 | Topramezone                               | (210631-68-8) |
| 863 | Topramezone metabolite M670H05            | (223646-24-0) |
| 864 | Tralkoxydim                               | (87820-88-0)  |
| 865 | Tralomethrin                              | (66841-25-6)  |
| 866 | Transfluthrin                             | (118712-89-3) |
| 867 | Triadimefon                               | (43121-43-3)  |
| 868 | Triadimenol                               | (55219-65-3)  |
| 869 | Triallate                                 | (2303-17-5)   |
| 870 | Triapenthenol                             | (76608-88-3)  |
| 871 | Triasulfuron                              | (82097-50-5)  |
| 872 | Triazamate                                | (112143-82-5) |
| 873 | Triazophos                                | (24017-47-8)  |
| 874 | Triazoxide                                | (72459-58-6)  |
| 875 | Tribenuron methyl                         | (101200-48-0) |
| 876 | Tribufos (Merphos oxide. DEF)             | (78-48-8)     |
| 877 | Trichlamide                               | (70193-21-4)  |
| 878 | Trichlorfon (Dylox)                       | (52-68-6)     |
| 879 | Triclocarban                              | (101-20-2)    |
| 880 | Triclopyr                                 | (55335-06-3)  |
| 881 | Triclopyr-methylester                     | (60825-26-5)  |
| 882 | Triclosan                                 | (3380-34-5)   |
| 883 | Tricyclazole                              | (41814-78-2)  |
| 884 | Tridemorph                                | ( 81412-43-3) |
| 885 | Trietazine                                | (1912-26-1)   |
| 886 | Trifloxystrobin                           | (141517-21-7) |
| 887 | Trifloxysulfuron                          | (145099-21-4) |

|     |                                       |                              |
|-----|---------------------------------------|------------------------------|
| 888 | Triflumizol                           | (68694-11-1. old:99387-89-0) |
| 889 | Triflumizol Metabolite FM-6-1         | (131549-75-2)                |
| 890 | Triflumizole                          | (99387-89-0)                 |
| 891 | Triflumizole FM-6-1                   | (109849-99-2)                |
| 892 | Triflumuron                           | (64628-44-0)                 |
| 893 | Triflusufuron-m metabolite IN-D8526   | (na)                         |
| 894 | Triflusulfuron-methyl                 | (126535-15-7)                |
| 895 | Triforine                             | (26644-46-2)                 |
| 896 | Trimethacarb (2.3.5-)                 | (12407-86-2)                 |
| 897 | Trinexapac free acid                  | (104273-73-6)                |
| 898 | Trinexapac-ethyl                      | (95266-40-3)                 |
| 899 | Triphenylphosphate                    | (115-86-6)                   |
| 900 | Triticonazole                         | (131983-72-7)                |
| 901 | Tritosulfuron                         | (142469-14-5)                |
| 902 | Tritosulfuron metabolite AMTT         | (5311-05-7)                  |
| 903 | Uniconazole                           | (83657-22-1)                 |
| 904 | Uracil                                | (66-22-8)                    |
| 905 | Valifenalate                          | (283159-90-0)                |
| 906 | Vamidothion                           | (2275-23-2)                  |
| 907 | Vegadex (Sulfallate)                  | (95-06-7)                    |
| 908 | Vernolate                             | (1929-77-7)                  |
| 909 | Vinclozolin                           | (50471-44-8)                 |
| 910 | Warfarin                              | (81-81-2)                    |
| 911 | XMC                                   | (2655-14-3)                  |
| 912 | Zoxamide                              | (156052-68-5)                |
| 913 | 3 5 6-Trichloro-2-pyridinol (TCPy)    | (6515-38-4)                  |
| 914 | 4-Chlor-2-methylphenol                | (1570-64-5)                  |
| 915 | AD-67                                 | (71526-07-3)                 |
| 916 | Aminobenzimidazole 2-                 | (934-32-7)                   |
| 917 | Anilazine (Zinochlor)                 | (101-05-3)                   |
| 918 | Anthraquinone                         | (84-65-1)                    |
| 919 | Asulam                                | (3337-71-1)                  |
| 920 | Asulam metabolite Acetyl Sulfanilamid | (na)                         |
| 921 | BAC 10                                | (965-32-2)                   |
| 922 | BAC 12                                | (139-07-1)                   |
| 923 | BAC 14                                | (139-08-2)                   |
| 924 | BAC 16                                | (122-18-9)                   |
| 925 | BAC 18                                | (122-19-0)                   |
| 926 | Benfuresate NH4-adduct                | (68505-69-1)                 |
| 927 | Benzisothiazol-3(2H)-one 1-2-         | (2634-33-5)                  |

|     |                                                           |                        |
|-----|-----------------------------------------------------------|------------------------|
| 928 | Benzoic acid 3-6-Dichloro-2-hydroxy- (dicamba metabolite) | (3401-80-7)            |
| 929 | Benzovindiflupyr                                          | (1072957-71-1)         |
| 930 | Benzylaminopurine 6-                                      | (1214-39-7)            |
| 931 | Carbamate Ethyl-N-(3-hydroxyphenyl)-                      | (7159-96-8)            |
| 932 | Carbanilide                                               | (102-07-8)             |
| 933 | Carbanolate                                               | (671-04-5)             |
| 934 | Carbophenothion-Methyl                                    | (953-17-3)             |
| 935 | Cetylpyridinium chloride                                  | (6004-24-6)            |
| 936 | Chinomethionat                                            | (2439-01-2)            |
| 937 | Chlorantraniliprole                                       | (500008-45-7)          |
| 938 | Chlorfluazuron                                            | (71422-67-8)           |
| 939 | Chloridazon-desphenyl-methyl                              | (17254-80-7)           |
| 940 | Chlorothalonil-4-hydroxy                                  | (na)                   |
| 941 | Chlozolate                                                | (72391-46-9)           |
| 942 | Cloprop                                                   | (101-10-0)             |
| 943 | Coumafuryl                                                | (117-52-2)             |
| 944 | Cycloxydim                                                | (101205-02-1)          |
| 945 | Cyenoxyrafen                                              | (560121-52-0)          |
| 946 | Cyhalofop acid                                            | (122008-78-0)          |
| 947 | DDAC-C10                                                  | (7173-51-5)            |
| 948 | DDAC-C12                                                  | (3401-74-9)            |
| 949 | Diafenthiuron metabolite CGA 140408                       | (na)                   |
| 950 | Diafenthiuron metabolite CGA 177960                       | (na)                   |
| 951 | Dibromo-4-hydroxy-benzoic acid 3-5-                       | (3337-62-0)            |
| 952 | Difenacoum                                                | (56073-07-5)           |
| 953 | Dihydroquinoline 2-2-4-Trimethyl-1-2-                     | (147-47-7)             |
| 954 | Dimethachlor metabolite CGA 369873                        | (na)                   |
| 955 | Dimethoate metabolite Desmethyl Dimethoate                | (na)                   |
| 956 | Dimethoate metabolite Dimethoate carboxylic acid          | (1113-01-5)            |
| 957 | Dinocap-Meptyl Ester NH4-adduct                           | (131-72-6 / 6119-92-2) |
| 958 | Dinocap-Meptyl Phenol                                     | (3687-22-7)            |
| 959 | Diphenylamine N-Nitroso-                                  | (86-30-6)              |
| 960 | Dithianon                                                 | (3347-22-6)            |
| 961 | DMSA                                                      | (4710-17-2)            |
| 962 | Ethoxy-1-2-3-4-tetra-hydro-2-2-4-trimethylchinolin 6-     | (16489-90-0)           |
| 963 | Fenpropimorph Carboxylic Acid                             | (121098-45-1)          |
| 964 | Fensulfothion-oxon                                        | (6552-21-2)            |
| 965 | Fipronil-desulfinyl                                       | (205650-65-3)          |



|      |                                                                       |               |
|------|-----------------------------------------------------------------------|---------------|
| 966  | Fipronil-sulfide                                                      | (120067-83-6) |
| 967  | Flonicamid metabolite TFNA-AM                                         | (158062-71-6) |
| 968  | Flonicamid metabolite TFNG                                            | (207502-65-6) |
| 969  | Florasulam                                                            | (145701-23-1) |
| 970  | Fluazifop-P-Butyl metabolite CGA 142110                               | (33252-63-0)  |
| 971  | Fluazinam                                                             | (79622-59-6)  |
| 972  | Fluchloralin                                                          | (33245-39-5)  |
| 973  | Flufenacet sulfonic acid (FOE 5043-sulfonic acid)                     | (947601-87-8) |
| 974  | Flufenacet thioglycolate sulfoxide (FOE 5043 thioglycolate sulfoxide) | (201668-33-9) |
| 975  | Flufenacet-oxalate (FOE 5043-oxalate)                                 | (201668-31-7) |
| 976  | Fluometuron                                                           | (2164-17-2)   |
| 977  | Flusulfamide                                                          | (106917-52-6) |
| 978  | Folpet                                                                | (133-07-3)    |
| 979  | Formothion                                                            | (2540-82-1)   |
| 980  | Halosulfuron-methyl                                                   | (100784-20-1) |
| 981  | Homobrassinolide 22(S)-23(S)-                                         | (80483-89-2)  |
| 982  | Imazapic                                                              | (104098-48-8) |
| 983  | Indole-3-butyric acid                                                 | (133-32-4)    |
| 984  | Indolyl-acetic-acid-ethyl-ester 3-                                    | (778-82-5)    |
| 985  | Iodocarb                                                              | (55406-53-6)  |
| 986  | Iodophenoxyacetic acid 4-                                             | (1878-94-0)   |
| 987  | Iprodione metabolite RP 30228                                         | (na)          |
| 988  | Isofenphos-Oxon                                                       | (31120-85-1)  |
| 989  | Isothiazolin-3-one 2-Methyl-4- Peak 1                                 | (2682-20-4)   |
| 990  | Isothiazolin-3-one 5-Chloro-2-methyl-4-                               | (26172-55-4)  |
| 991  | Isotianil                                                             | (224049-04-1) |
| 992  | Kinetin                                                               | (525-79-1)    |
| 993  | Kresoxim-Methyl metabolite BF 490-1                                   | (137169-29-0) |
| 994  | Mandestrobin                                                          | (173662-97-0) |
| 995  | Mepanipyrim metabolite KIF-3535-M-31                                  | (204571-52-8) |
| 996  | Mepiquat 4-Hydroxy (Piperidinium)                                     | (na)          |
| 997  | Mesotrione metabolite AMBA                                            | (393085-45-5) |
| 998  | Metaflumizone e-isomere                                               | (139968-49-3) |
| 999  | Metalaxyl metabolite CGA 107955                                       | (104390-55-8) |
| 1000 | Metalaxyl metabolite CGA 108905                                       | (na)          |
| 1001 | Metalaxyl metabolite CGA 67869                                        | (66637-79-4)  |
| 1002 | Metalaxyl metabolite CGA 94689                                        | (na)          |
| 1003 | Milbemectin A4                                                        | (51596-11-3)  |
| 1004 | Naproanilide                                                          | (52570-16-8)  |
| 1005 | Nitroguaiacol 5-                                                      | (na)          |

|      |                                           |                |
|------|-------------------------------------------|----------------|
| 1006 | Noviflumuron                              | (121451-02-3)  |
| 1007 | Orthosulfamuron                           | (213464-77-8)  |
| 1008 | Penflufen                                 | (494793-67-8)  |
| 1009 | Pentachlorophenol                         | (87-86-5)      |
| 1010 | Penthiopyrad                              | (183675-82-3)  |
| 1011 | Pethoxamide metabolite MET-42             | (na)           |
| 1012 | Phenkapton                                | (2275-14-1)    |
| 1013 | Phenmedipham metabolite MHPC              | (13683-89-1)   |
| 1014 | Picolinicacid-methyl-ester 6-Chloro-2-    | (6636-55-1)    |
| 1015 | Pindone                                   | (83-26-1)      |
| 1016 | Prallethrin                               | (23031-36-9)   |
| 1017 | Prochloraz metabolite BTS 44595           | (139520-94-8)  |
| 1018 | Prochloraz metabolite BTS 44596           | (na)           |
| 1019 | Prochloraz metabolite BTS 9608            | (na)           |
| 1020 | Prohexadione                              | (88805-35-0)   |
| 1021 | Propamocarb-N-oxide                       | (na)           |
| 1022 | Propionic acid 3-(3-Indolyl)-             | (830-96-6)     |
| 1023 | Propoxycarbazone                          | (145026-81-9)  |
| 1024 | Prothiofos                                | (34643-46-4)   |
| 1025 | Prothoate                                 | (2275-18-5)    |
| 1026 | Pyrasulfotole                             | (365400-11-9)  |
| 1027 | Pyribenzoxim                              | (168088-61-7)  |
| 1028 | Pyridafenthion                            | (119-12-0)     |
| 1029 | Pyridafol                                 | (40020-01-7)   |
| 1030 | Pyrimisulfan                              | (221205-90-9)  |
| 1031 | Pyriofenone                               | (688046-61-9)  |
| 1032 | Quinolinol 1-2-Dihydro-2-2-4-trimethyl-6- | (na)           |
| 1033 | Quinolinone 2-2-4-Trimethyl-6(2H)-        | (na)           |
| 1034 | Saflufenacil Didesmethyl-                 | (na)           |
| 1035 | Saflufenacil Metabolite M800H35           | (1246768-31-9) |
| 1036 | Sedaxane                                  | (874967-67-6)  |
| 1037 | Sulcotrione metabolite CMBA               | (na)           |
| 1038 | Sulfanilamide                             | (63-74-1)      |
| 1039 | Sulfentrazone                             | (122836-35-5)  |
| 1040 | Sulfoxaflor                               | (946578-00-3)  |
| 1041 | TBSA Triflusulfuron metabolite            | (1869-24-5)    |
| 1042 | Tecloftalam                               | (76280-91-6)   |
| 1043 | Terbuthylazine-Desethyl                   | (30125-63-4)   |
| 1044 | Thiabendazole-5-hydroxy                   | (948-71-0)     |
| 1045 | Thifluzamide                              | (130000-40-7)  |
| 1046 | Thiomethon                                | (640-15-3)     |

|      |                                     |               |
|------|-------------------------------------|---------------|
| 1047 | Thionazin                           | (297-97-2)    |
| 1048 | Thiosultap                          | (98968-92-4)  |
| 1049 | Topramezone                         | (210631-68-8) |
| 1050 | Topramezone metabolite M670H05      | (223646-24-0) |
| 1051 | Transfluthrin                       | (118712-89-3) |
| 1052 | Triapenthenol                       | (76608-88-3)  |
| 1053 | Trichlamide                         | (70193-21-4)  |
| 1054 | Triclosan                           | (3380-34-5)   |
| 1055 | Triflumizole FM-6-1                 | (109849-99-2) |
| 1056 | Triflusufuron-m metabolite IN-D8526 | (na)          |
| 1057 | Triflusulfuron-methyl               | (126535-15-7) |
| 1058 | Trinexapac free acid                | (104273-73-6) |
| 1059 | Tritosulfuron metabolite AMTT       | (5311-05-7)   |
| 1060 | Uracil                              | (66-22-8)     |
